# Supplementary material for: Droplet Hamilton Dynamics 1: the rolling angle of a water droplet on an inclined surface
Source: Research Square preprint supplement (doi:10.21203/rs.3.rs-8817038/v1), 2026-02-10
Supplement: Supplementary file 1 [file 2a078155ce5a1127e6591236.xlsx]

## Sheet: (29,30.3)
																					whole potentials of the equilibrium droplet		the unit length energy barrier
0	0	0	0.001934	0	1.18e-05	1.18e-05	0.003868	0.003868	0	4.70027e-05		(0,0,0)	-4.474	-255.5	1.804	1.804	-967.9	70.22	162.9		2.751e-06		2.9e-06
0.2	0	0	0.00185513	0.00938631	1.17e-05	1.18e-05	0.00387431	0.00388377	6.99958e-06	4.48302e-05		(1,0,0)	5.295	1017	22.45	22.45	3444	-52.21	-365.1
0.4	0	0	0.00178876	0.0113787	1.16e-05	1.19e-05	0.00389124	0.0039261	1.02416e-05	4.36984e-05		(0,1,0)	2.071	-4.552	-0.5668	-0.5668	-19.07	-9.022	-0.4274
0.8	0	0	0.0016712	0.0128285	1.14e-05	1.28e-05	0.0039521	0.00408345	1.2816e-05	4.16937e-05		(0,0,1)	1.769	3.913	-0.2862	-0.2862	11.42	3.493	-0.5125
1.2	0	0	0.00155235	0.0144357	1.09e-05	1.58e-05	0.00405119	0.00459503	1.58248e-05	3.96648e-05		(2,0,0)	-3.538	-1271	-40.97	-40.97	-4144	-19.53	388.2
1.6	0	0	0.0014336	0.0156319	1.03e-05	1.79e-05	0.00418826	0.0049758	1.79301e-05	3.77148e-05		(1,1,0)	-3.18	10.86	1.399	1.399	31.92	19.47	-1.003
2	0	0	0.00119936	0.017163	9.07e-06	2.02e-05	0.00445571	0.00546317	2.02478e-05	3.68332e-05		(1,0,1)	-3.153	-9.357	0.3749	0.3749	-32.15	-6.066	2.591
2.1	0	0	0.0011693	0.017551	8.82e-06	2.09e-05	0.00451035	0.00558666	2.08983e-05	3.6648e-05		(0,2,0)	-0.02889	-0.0528	-0.0042	-0.0042	0.0528	-0.03146	0.03583
2.2	0	0	0.00114137	0.0179051	8.57e-06	2.15e-05	0.00456551	0.00569937	2.14664e-05	3.64399e-05		(0,1,1)	-0.04098	0.1122	0.0128	0.0128	0.417	0.179	0.02586
2.3	0	0	0.00111529	0.0182304	8.32e-06	2.2e-05	0.00462122	0.00580293	2.19625e-05	3.62147e-05		(0,0,2)	-0.02451	-0.03695	0.002709	0.002709	-0.06828	-0.08464	-0.02506
2.4	0	0	0.0010908	0.0185315	8.06e-06	2.24e-05	0.00467747	0.00589876	2.23961e-05	3.59781e-05		(3,0,0)	4.29	673.2	28.81	28.81	2118	38.84	-182.3
2.5	0	0	0.00106985	0.0188191	7.81e-06	2.28e-05	0.00473215	0.00602837	2.28039e-05	3.58277e-05		(2,1,0)	1.703	-9.048	-1.227	-1.227	-19.01	-14.36	1.904
2.6	0	0	0.00104996	0.0190906	7.56e-06	2.32e-05	0.0047874	0.0061665	2.31679e-05	3.56699e-05		(2,0,1)	1.832	7.375	-0.1217	-0.1217	26.51	3.293	-2.851
2.7	0	0	0.00103103	0.0194514	7.31e-06	2.37e-05	0.00484321	0.00630602	2.37449e-05	3.58889e-05		(1,2,0)	0.02714	0.1146	0.01474	0.01474	0.009409	0.09684	-0.03519
2.8	0	0	0.00101487	0.0197611	7.06e-06	2.42e-05	0.00489743	0.00644157	2.42046e-05	3.60072e-05		(1,1,1)	0.04664	-0.1702	-0.02143	-0.02143	-0.4658	-0.2567	-0.01578
2.9	0	0	0.000997592	0.0201078	6.8e-06	2.47e-05	0.00495423	0.00658358	2.47398e-05	3.62338e-05		(1,0,2)	0.03017	0.04756	-0.003328	-0.003328	0.1237	0.1047	0.0273
3	0	0	0.000982837	0.0204052	6.55e-06	2.52e-05	0.0050094	0.00672149	2.51613e-05	3.63571e-05		(0,3,0)	0.0002341	-0.000973	-0.0001901	-0.0001901	-0.0002778	-0.001288	-0.0005978
3.2	0	0	0.000953608	0.0210003	6.03e-06	2.6e-05	0.0051229	0.00700525	2.59818e-05	3.66241e-05		(0,2,1)	0.0001755	0.001008	0.0001261	0.0001261	-0.00132	0.0007736	-0.0001297
3.4	0	0	0.000925734	0.0215966	5.5e-06	2.68e-05	0.00523924	0.0072961	2.67807e-05	3.69806e-05		(0,1,2)	0.0002818	-0.00092	-9.636e-05	-9.636e-05	-0.002767	-0.001255	-0.0002882
3.6	0	0	0.000899863	0.0221563	4.96e-06	2.75e-05	0.00535716	0.00759089	2.74708e-05	3.72932e-05		(0,0,3)	0.0001055	0.0002619	-2.297e-06	-2.297e-06	0.0003992	0.0005866	0.0001967
3.8	0	0	0.000874795	0.022725	4.41e-06	2.82e-05	0.00547799	0.00789298	2.81567e-05	3.76709e-05		(4,0,0)	-0.7099	-129.9	-6.92	-6.92	-394.3	-12.37	32.64
4	0	0	0.000852274	0.0232491	3.86e-06	2.87e-05	0.00559876	0.0081949	2.87231e-05	3.79823e-05		(3,1,0)	-0.3412	2.667	0.3794	0.3794	4.124	3.616	-0.6983
4.2	0	0	0.000831	0.023755	3.31e-06	2.92e-05	0.00572104	0.0085006	2.9227e-05	3.82735e-05		(3,0,1)	-0.3328	-1.941	-0.01057	-0.01057	-6.788	-0.5289	0.8858
2.3	0	-5	0.0018974	0.00924168	1.16e-05	1.19e-05	0.00390168	0.00395219	6.73781e-06	4.2735e-05		(2,2,0)	-0.003518	-0.06469	-0.009492	-0.009492	-0.0323	-0.0505	0.0119
1.9	0	-4	0.00187693	0.00920902	1.16e-05	1.19e-05	0.00391137	0.00397644	6.67361e-06	3.51309e-05		(2,1,1)	-0.01592	0.06498	0.009439	0.009439	0.1347	0.09337	-0.001085
2.3	0	-4	0.00174653	0.0115416	1.1e-05	1.25e-05	0.00404047	0.00429918	1.0143e-05	4.04879e-05		(2,0,2)	-0.008915	-0.01382	0.001027	0.001027	-0.04801	-0.03103	-0.007085
1.7	0	-3	0.00187475	0.00944522	1.16e-05	1.19e-05	0.00390829	0.00396873	7.02591e-06	4.26189e-05		(1,3,0)	-0.0002542	0.00108	0.0001849	0.0001849	0.0005645	0.0006756	6.073e-05
1.9	0	-3	0.0017081	0.0135535	1.1e-05	1.4e-05	0.00403969	0.00431423	1.39904e-05	4.14987e-05		(1,2,1)	8.749e-05	-0.0009857	-0.0001598	-0.0001598	0.0002545	-0.0007525	0.0001266
2.3	0	-3	0.00152931	0.0141062	1.01e-05	1.44e-05	0.00424031	0.00479879	1.44139e-05	4.13939e-05		(1,1,2)	-0.0001758	0.0007381	8.359e-05	8.359e-05	0.001603	0.0008982	0.0001222
1.5	0	-2	0.00183927	0.00991083	1.15e-05	1.2e-05	0.00392484	0.00401009	7.70286e-06	4.17107e-05		(1,0,3)	-6.623e-05	-0.000168	1.908e-06	1.908e-06	-0.0002956	-0.0003762	-0.0001176
1.7	0	-2	0.0017012	0.0118907	1.1e-05	1.25e-05	0.0040263	0.00426376	1.08046e-05	4.18235e-05		(0,4,0)	1.834e-06	-4.234e-06	-6.348e-07	-6.348e-07	-9.497e-06	5.802e-06	7.102e-06
2.3	0	-2	0.00136706	0.0161114	9.37e-06	1.81e-05	0.00438959	0.00517197	1.81294e-05	3.60263e-05		(0,3,1)	-3.84e-06	5.64e-06	1.348e-06	1.348e-06	7.501e-06	3.493e-06	-5.779e-07
1.5	0	-1	0.0016683	0.0121928	1.1e-05	1.25e-05	0.00402742	0.00426655	1.13574e-05	4.13201e-05		(0,2,2)	-1.083e-07	-3.597e-06	-4.886e-07	-4.886e-07	4.651e-06	-2.369e-06	3.893e-07
1.7	0	-1	0.00151287	0.0139937	1.04e-05	1.45e-05	0.00415437	0.00458393	1.44905e-05	3.98062e-05		(0,1,3)	-6.057e-07	2.031e-06	2.026e-07	2.026e-07	5.499e-06	2.811e-06	8.893e-07
2.3	0	-1	0.00130054	0.0182756	9.1e-06	2.3e-05	0.00445078	0.00581729	2.2985e-05	3.80645e-05		(0,0,4)	-1.355e-07	-6.588e-07	-1.969e-08	-1.969e-08	-1.069e-06	-1.267e-06	-4.39e-07
2.5	0	-1	0.00117472	0.0178752	8.29e-06	2.11e-05	0.00462728	0.00576621	2.10848e-05	3.63695e-05
1.5	0	1	0.00139784	0.0153502	1.03e-05	1.73e-05	0.0041897	0.00488613	1.72835e-05	3.76728e-05
1.7	0	1	0.00133096	0.0164617	9.88e-06	1.94e-05	0.00427807	0.00523991	1.9448e-05	3.7009e-05
1.9	0	1	0.00118007	0.0174126	9.14e-06	2.09e-05	0.00444098	0.0055426	2.09148e-05	3.6318e-05
2.3	0	1	0.00106582	0.0189695	8.11e-06	2.35e-05	0.00466673	0.00603817	2.35263e-05	3.61835e-05
1.5	0	2	0.00134413	0.0162509	1.01e-05	1.92e-05	0.00422192	0.00517283	1.92172e-05	3.65046e-05
1.7	0	2	0.00117574	0.0173064	9.4e-06	2.09e-05	0.00438362	0.0055088	2.09488e-05	3.62122e-05
2.3	0	2	0.00100334	0.0198458	7.85e-06	2.54e-05	0.0047242	0.00631712	2.54069e-05	3.69532e-05
2.7	0	2	0.000918224	0.0213747	6.75e-06	2.79e-05	0.00496504	0.00680378	2.78871e-05	3.81634e-05
2.9	0	2	0.000879233	0.0220842	6.18e-06	2.89e-05	0.00509153	0.00702963	2.89346e-05	3.87031e-05
1.5	0	3	0.00118413	0.0170622	9.7e-06	2.07e-05	0.00431792	0.00543108	2.069e-05	3.61633e-05
1.7	0	3	0.00110943	0.017882	9.2e-06	2.21e-05	0.00442871	0.00569202	2.2123e-05	3.55718e-05
2.1	0	3	0.000991969	0.0198178	8.14e-06	2.57e-05	0.00465931	0.00630821	2.57224e-05	3.71114e-05
2.3	0	3	0.000944313	0.0206274	7.6e-06	2.71e-05	0.00477851	0.00656589	2.71037e-05	3.77467e-05
2.5	0	3	0.000898593	0.0214112	7.03e-06	2.84e-05	0.00490341	0.0068154	2.8377e-05	3.83989e-05
2.9	0	3	0.000821002	0.0227405	5.87e-06	3.02e-05	0.00515908	0.00723854	3.02225e-05	3.922e-05
1.5	0	4	0.0013982	0.0171876	1.03e-05	2.17e-05	0.00418948	0.005471	2.16699e-05	3.47882e-05
1.7	0	4	0.00105019	0.0186977	9.01e-06	2.4e-05	0.00446899	0.00595167	2.39542e-05	3.63724e-05
1.9	0	4	0.000992072	0.0196192	8.49e-06	2.57e-05	0.00458387	0.00624498	2.56614e-05	3.70374e-05
2.3	0	4	0.000887234	0.0213332	7.36e-06	2.86e-05	0.00483103	0.00679056	2.86413e-05	3.85112e-05
2.5	0	4	0.000846529	0.0219758	6.8e-06	2.95e-05	0.00495547	0.00699511	2.95415e-05	3.88121e-05
1.5	0	5	0.00106925	0.0182733	9.39e-06	2.33e-05	0.00438685	0.00581658	2.33367e-05	3.60797e-05
1.7	0	5	0.00099976	0.0193412	8.86e-06	2.54e-05	0.00450328	0.00615651	2.54219e-05	3.69584e-05
1.9	0	5	0.000941041	0.0202542	8.31e-06	2.71e-05	0.00462265	0.00644711	2.71001e-05	3.76948e-05
2.3	0	5	0.000839275	0.0218258	7.16e-06	2.97e-05	0.00487515	0.00694735	2.96774e-05	3.88484e-05
2.5	0	5	0.000795972	0.0224844	6.56e-06	3.06e-05	0.00500603	0.007157	3.05734e-05	3.91843e-05
1.5	0	6	0.00101872	0.0189278	9.25e-06	2.49e-05	0.00441717	0.00602492	2.48555e-05	3.67529e-05
1.7	0	6	0.000952954	0.019911	8.71e-06	2.67e-05	0.00453511	0.00633786	2.67379e-05	3.75239e-05
1.9	0	6	0.000892508	0.0208129	8.14e-06	2.84e-05	0.00465953	0.00662496	2.83689e-05	3.82678e-05
2.3	0	6	0.000789298	0.0223364	6.95e-06	3.08e-05	0.00492113	0.00710989	3.07579e-05	3.93188e-05
2.5	0	6	0.00074727	0.0229369	6.34e-06	3.15e-05	0.00505473	0.00730105	3.14701e-05	3.95067e-05
1.3	0	7	0.0010529	0.0183326	9.66e-06	2.38e-05	0.00432617	0.00583546	2.38376e-05	3.63624e-05
1.5	0	7	0.000976055	0.0194379	9.13e-06	2.61e-05	0.00444277	0.00618729	2.6052e-05	3.72117e-05
1.7	0	7	0.000905339	0.0204749	8.56e-06	2.81e-05	0.00456749	0.00651735	2.80572e-05	3.81798e-05
1.9	0	7	0.00084622	0.0213134	7.98e-06	2.95e-05	0.00469471	0.00678428	2.95058e-05	3.87875e-05
2.1	0	7	0.000795114	0.0220219	7.39e-06	3.06e-05	0.00482466	0.00700978	3.05651e-05	3.91573e-05
2.3	0	7	0.000745261	0.0227096	6.77e-06	3.15e-05	0.00496164	0.0072287	3.15034e-05	3.95207e-05
2.5	0	7	0.000700706	0.0233268	6.13e-06	3.22e-05	0.00510129	0.00742514	3.22118e-05	3.97477e-05
1.5	0	8	0.000933059	0.0199402	9.01e-06	2.72e-05	0.00446856	0.00634716	2.72463e-05	3.77528e-05
1.7	0	8	0.000864006	0.0209096	8.44e-06	2.91e-05	0.0045956	0.00665574	2.90674e-05	3.85916e-05
1.9	0	8	0.000806006	0.0216856	7.84e-06	3.03e-05	0.00472528	0.00690273	3.03282e-05	3.90571e-05
2.1	0	8	0.000752223	0.0223984	7.23e-06	3.14e-05	0.00486069	0.00712963	3.13587e-05	3.94401e-05
2.3	0	8	0.000703604	0.0230274	6.59e-06	3.21e-05	0.00499996	0.00732985	3.21118e-05	3.96557e-05
2.5	0	8	0.00065649	0.0236622	5.93e-06	3.28e-05	0.00514551	0.00753191	3.28205e-05	3.99238e-05
1.5	0	9	0.000893059	0.0203758	8.9e-06	2.83e-05	0.00449256	0.00648581	2.82866e-05	3.82034e-05
1.7	0	9	0.000825213	0.0212801	8.31e-06	2.99e-05	0.00462198	0.00677365	2.99196e-05	3.89055e-05
1.9	0	9	0.000768287	0.0219941	7.71e-06	3.1e-05	0.00475394	0.00700095	3.09904e-05	3.9226e-05
2.1	0	9	0.000711805	0.0227122	7.07e-06	3.2e-05	0.00489464	0.00722952	3.19942e-05	3.96238e-05
2.3	0	9	0.000660501	0.0233653	6.41e-06	3.28e-05	0.00503962	0.0074374	3.27674e-05	3.99032e-05
1.5	0	10	0.000855866	0.020753	8.8e-06	2.92e-05	0.00451488	0.0066059	2.91877e-05	3.85771e-05
1.7	0	10	0.000789031	0.0215868	8.2e-06	3.06e-05	0.00464658	0.00687128	3.06106e-05	3.91124e-05
1.9	0	10	0.000729343	0.0223112	7.58e-06	3.17e-05	0.00478354	0.00710187	3.16724e-05	3.94729e-05
2.1	0	10	0.000674025	0.0229714	6.93e-06	3.25e-05	0.00492638	0.00731201	3.24927e-05	3.97252e-05
2.3	1	-4	0.00191246	0.00855909	1.17e-05	1.18e-05	0.00388781	0.00391753	5.79994e-06	4.32013e-05
1.9	1	-3	0.0018762	0.00925031	1.16e-05	1.2e-05	0.00391193	0.00397782	6.73262e-06	3.51295e-05
2.3	1	-3	0.00173788	0.0116233	1.09e-05	1.26e-05	0.00404843	0.00431908	1.02666e-05	4.02978e-05
1.5	1	-2	0.00193261	0.0079058	1.17e-05	1.18e-05	0.00386884	0.00387009	4.97265e-06	4.18704e-05
1.7	1	-2	0.00184607	0.00994065	1.15e-05	1.2e-05	0.00392779	0.00401747	7.74342e-06	4.25795e-05
1.9	1	-2	0.00165255	0.0149683	1.08e-05	1.69e-05	0.0040819	0.00476454	1.68827e-05	4.37125e-05
2.3	1	-2	0.00147519	0.0143602	9.83e-06	1.48e-05	0.0042901	0.00492326	1.47558e-05	3.61614e-05
1.5	1	-1	0.0017831	0.0106911	1.13e-05	1.22e-05	0.00395854	0.00409435	8.88639e-06	4.14457e-05
1.7	1	-1	0.00164137	0.0126172	1.08e-05	1.27e-05	0.00406699	0.00436548	1.20408e-05	4.16021e-05
2.3	1	-1	0.00133401	0.0169866	9.24e-06	2e-05	0.00441999	0.00540701	2.0005e-05	3.69641e-05
1.5	1	0	0.00159073	0.0130313	1.08e-05	1.28e-05	0.00407396	0.0043829	1.28216e-05	4.00011e-05
1.7	1	0	0.0014578	0.0146593	1.03e-05	1.58e-05	0.00419182	0.00467754	1.57543e-05	3.91766e-05
2.3	1	0	0.00129122	0.0190947	9.06e-06	2.5e-05	0.00445936	0.00607804	2.50401e-05	3.89713e-05
2.5	1	0	0.00114137	0.0182095	8.14e-06	2.17e-05	0.00466063	0.00584957	2.171e-05	3.6029e-05
1.5	1	1	0.00144419	0.0147271	1.04e-05	1.6e-05	0.00416189	0.00468779	1.60192e-05	3.83075e-05
1.7	1	1	0.00135554	0.0160009	9.96e-06	1.85e-05	0.00426135	0.00509324	1.84501e-05	3.7574e-05
2.3	1	1	0.00110542	0.0183714	8.28e-06	2.23e-05	0.0046303	0.00584781	2.22559e-05	3.55696e-05
2.5	1	1	0.00105743	0.0192485	7.76e-06	2.38e-05	0.00474457	0.00612699	2.37876e-05	3.62605e-05
1.5	1	2	0.00136376	0.0158791	1.02e-05	1.84e-05	0.00421015	0.00505449	1.84015e-05	3.70734e-05
1.7	1	2	0.0013187	0.0168234	9.84e-06	2.03e-05	0.0042864	0.00535504	2.02705e-05	3.63056e-05
1.9	1	2	0.00113813	0.0177582	8.99e-06	2.16e-05	0.00447286	0.00565262	2.15874e-05	3.57998e-05
2.3	1	2	0.00103065	0.0194769	7.96e-06	2.46e-05	0.00469908	0.00619969	2.46148e-05	3.66537e-05
2.5	1	2	0.000987149	0.0202667	7.44e-06	2.59e-05	0.00481485	0.00645109	2.59456e-05	3.72525e-05
2.9	1	2	0.000908839	0.0217093	6.33e-06	2.82e-05	0.00505719	0.00691029	2.81761e-05	3.83339e-05
1.5	1	3	0.00121949	0.0168044	9.8e-06	2.02e-05	0.00429671	0.00534902	2.01739e-05	3.66621e-05
1.7	1	3	0.00113387	0.017643	9.27e-06	2.16e-05	0.00441208	0.00561595	2.16222e-05	3.57139e-05
1.9	1	3	0.00106993	0.0185927	8.76e-06	2.34e-05	0.00452469	0.00591825	2.33726e-05	3.61267e-05
2.1	1	3	0.00101532	0.0195139	8.23e-06	2.51e-05	0.00463969	0.00621148	2.50547e-05	3.68453e-05
2.3	1	3	0.00168257	0.020978	1.07e-05	3.3e-05	0.00409931	0.00667751	3.30163e-05	3.95088e-05
2.9	1	3	0.000847953	0.0224204	6.01e-06	2.96e-05	0.00512781	0.00713665	2.95822e-05	3.88898e-05
1.5	1	4	0.00114584	0.0174062	9.6e-06	2.14e-05	0.00434089	0.00554058	2.14123e-05	3.58302e-05
1.7	1	4	0.00107362	0.0183725	9.08e-06	2.32e-05	0.00445306	0.00584813	2.32167e-05	3.601e-05
2.3	1	4	0.00090802	0.0210859	7.45e-06	2.81e-05	0.0048119	0.00671186	2.81047e-05	3.82607e-05
2.5	1	4	0.000864519	0.0218074	6.88e-06	2.92e-05	0.00493748	0.00694152	2.92096e-05	3.87663e-05
2.7	1	4	0.000826939	0.0224148	6.3e-06	3e-05	0.00506363	0.00713486	2.99939e-05	3.90173e-05
2.9	1	4	0.000787613	0.0230737	5.69e-06	3.08e-05	0.00519781	0.00734458	3.08492e-05	3.94159e-05
1.5	1	5	0.00108509	0.0180798	9.43e-06	2.29e-05	0.00437735	0.00575499	2.28978e-05	3.59884e-05
1.7	1	5	0.00101907	0.019088	8.92e-06	2.48e-05	0.00449015	0.00607589	2.48383e-05	3.66676e-05
1.9	1	5	0.000956992	0.0200762	8.37e-06	2.67e-05	0.00461053	0.00639046	2.67022e-05	3.75718e-05
2.1	1	5	0.000904296	0.0208993	7.81e-06	2.81e-05	0.00473295	0.00665247	2.81187e-05	3.81924e-05
2.3	1	5	0.000856914	0.0216459	7.24e-06	2.93e-05	0.00485892	0.00689012	2.92991e-05	3.87116e-05
2.7	1	5	0.000770437	0.0230028	6.02e-06	3.12e-05	0.00512465	0.00732203	3.11609e-05	3.95139e-05
1.5	1	6	0.00161437	0.0174379	1.09e-05	2.3e-05	0.00405978	0.00555065	2.30413e-05	3.39216e-05
1.7	1	6	0.000968618	0.0197163	8.76e-06	2.63e-05	0.00452446	0.00627589	2.62842e-05	3.73018e-05
1.9	1	6	0.000908838	0.0206256	8.2e-06	2.79e-05	0.00464712	0.00656532	2.79417e-05	3.80617e-05
2.3	1	6	0.000807442	0.0221373	7.03e-06	3.03e-05	0.00490443	0.00704653	3.03273e-05	3.90783e-05
2.5	1	6	0.000762393	0.0228094	6.41e-06	3.12e-05	0.00503961	0.00726047	3.1227e-05	3.94465e-05
1.3	1	7	0.00106853	0.0181281	9.7e-06	2.34e-05	0.00431805	0.00577037	2.33551e-05	3.61234e-05
1.5	1	7	0.000987774	0.0193107	9.16e-06	2.58e-05	0.00443574	0.0061468	2.57557e-05	3.71399e-05
1.7	1	7	0.000921247	0.0202799	8.61e-06	2.76e-05	0.00455667	0.00645529	2.75961e-05	3.79131e-05
1.9	1	7	0.000862942	0.0211175	8.04e-06	2.91e-05	0.004682	0.0067219	2.90519e-05	3.85146e-05
2.3	1	7	0.0007599	0.0225816	6.83e-06	3.12e-05	0.00494817	0.00718795	3.12444e-05	3.94244e-05
2.5	1	7	0.000716153	0.0231878	6.2e-06	3.19e-05	0.00508585	0.00738092	3.19392e-05	3.96209e-05
1.5	1	8	0.000944887	0.0198076	9.05e-06	2.69e-05	0.00446147	0.00630497	2.69311e-05	3.76211e-05
1.7	1	8	0.000876487	0.0207711	8.47e-06	2.87e-05	0.00458711	0.00661166	2.87412e-05	3.84265e-05
1.9	1	8	0.000819288	0.0215461	7.89e-06	3e-05	0.00471518	0.00685834	3.00099e-05	3.88873e-05
2.1	1	8	0.000766323	0.0222569	7.28e-06	3.1e-05	0.00484885	0.00708458	3.10479e-05	3.92663e-05
2.3	1	8	0.000714574	0.0229569	6.64e-06	3.2e-05	0.00498987	0.00730741	3.19883e-05	3.96639e-05
1.5	1	9	0.000905057	0.020238	8.94e-06	2.8e-05	0.00448537	0.00644195	2.79534e-05	3.80222e-05
1.7	1	9	0.000837954	0.0211354	8.35e-06	2.96e-05	0.00461331	0.00672759	2.95744e-05	3.86929e-05
1.9	1	9	0.000778006	0.021919	7.75e-06	3.08e-05	0.00474656	0.00697702	3.08317e-05	3.91947e-05
2.3	1	9	0.000671678	0.0232862	6.46e-06	3.26e-05	0.00502934	0.00741224	3.26213e-05	3.98646e-05
1.5	1	10	0.000864362	0.0206792	8.83e-06	2.9e-05	0.00450978	0.0065824	2.90157e-05	3.85396e-05
1.7	1	10	0.00079823	0.0215134	8.23e-06	3.04e-05	0.00464032	0.00684792	3.04475e-05	3.90706e-05
1.9	1	10	0.000739261	0.0222296	7.61e-06	3.15e-05	0.004776	0.00707591	3.14962e-05	3.94018e-05
2.1	1	10	0.000684661	0.0228876	6.97e-06	3.23e-05	0.00491745	0.00728536	3.23219e-05	3.965e-05
2.3	2	-3	0.00189882	0.00926439	1.16e-05	1.19e-05	0.00390036	0.00394891	6.77326e-06	4.42939e-05
1.7	2	-2	0.00192662	0.00811381	1.17e-05	1.18e-05	0.00387302	0.00388055	5.23211e-06	4.25122e-05
1.9	2	-2	0.00180784	0.0110588	1.13e-05	1.22e-05	0.00396388	0.00410771	9.49534e-06	3.77155e-05
2.3	2	-2	0.0016249	0.0127672	1.05e-05	1.3e-05	0.00415237	0.00457892	1.20677e-05	3.84388e-05
1.5	2	-1	0.00187708	0.00929945	1.16e-05	1.19e-05	0.00390215	0.00395337	6.82148e-06	4.18902e-05
1.7	2	-1	0.00175303	0.0112606	1.12e-05	1.23e-05	0.00399106	0.00417565	9.77696e-06	4.22347e-05
1.9	2	-1	0.00150814	0.0189795	1.03e-05	2.64e-05	0.00419166	0.00604138	2.64096e-05	4.9243e-05
2.3	2	-1	0.00139353	0.0154905	9.48e-06	1.69e-05	0.00436524	0.00511109	1.68582e-05	3.54582e-05
1.5	2	0	0.00168487	0.0120111	1.11e-05	1.24e-05	0.00401748	0.00424169	1.10493e-05	4.14824e-05
1.7	2	0	0.001526	0.0138499	1.05e-05	1.42e-05	0.00414544	0.0045616	1.42259e-05	3.99754e-05
2.3	2	0	0.00129852	0.0182865	9.09e-06	2.3e-05	0.00445264	0.00582077	2.30022e-05	3.82579e-05
1.5	2	1	0.00148968	0.0141355	1.05e-05	1.49e-05	0.00413459	0.00453449	1.48589e-05	3.8775e-05
1.7	2	1	0.00138865	0.015527	1.01e-05	1.75e-05	0.00423883	0.00494241	1.74702e-05	3.81676e-05
2.3	2	1	0.00113782	0.0180829	8.41e-06	2.17e-05	0.00460048	0.00575598	2.17145e-05	3.59254e-05
2.5	2	1	0.00108898	0.0187683	7.9e-06	2.28e-05	0.00471302	0.00598056	2.27822e-05	3.58099e-05
1.5	2	2	0.00138622	0.0155128	1.03e-05	1.76e-05	0.00419667	0.00493789	1.76211e-05	3.74746e-05
1.7	2	2	0.00124728	0.0167011	9.62e-06	1.97e-05	0.00433497	0.00531613	1.97411e-05	3.7091e-05
1.9	2	2	0.00116731	0.017515	9.1e-06	2.11e-05	0.00445068	0.0055752	2.11123e-05	3.61481e-05
2.3	2	2	0.00140584	0.0207406	9.54e-06	3.03e-05	0.0043539	0.00660193	3.03054e-05	3.99552e-05
2.5	2	2	0.00101063	0.0199462	7.54e-06	2.53e-05	0.00479137	0.00634908	2.52681e-05	3.69749e-05
2.9	2	2	0.000933563	0.0213891	6.46e-06	2.75e-05	0.00502851	0.00680837	2.75277e-05	3.80316e-05
1.5	2	3	0.00133964	0.0164096	1.01e-05	1.96e-05	0.00422461	0.00522335	1.95814e-05	3.62999e-05
1.7	2	3	0.00115877	0.0174488	9.35e-06	2.12e-05	0.00439515	0.00555414	2.12356e-05	3.6021e-05
2.3	2	3	0.0009878	0.0200725	7.78e-06	2.59e-05	0.0047385	0.00638928	2.59044e-05	3.72354e-05
2.5	2	3	0.000943606	0.0208481	7.24e-06	2.72e-05	0.00485839	0.00663616	2.71823e-05	3.78381e-05
2.7	2	3	0.000905628	0.0215184	6.69e-06	2.82e-05	0.00497864	0.00684953	2.81765e-05	3.82524e-05
2.9	2	3	0.000866065	0.0222302	6.11e-06	2.92e-05	0.0051068	0.00707609	2.92186e-05	3.87957e-05
1.5	2	4	0.00116685	0.01724	9.65e-06	2.11e-05	0.00432829	0.00548767	2.107e-05	3.60706e-05
1.7	2	4	0.00140453	0.0175276	1.01e-05	2.23e-05	0.00422804	0.0055792	2.23214e-05	3.49761e-05
2.1	2	4	0.000976298	0.0200203	8.08e-06	2.62e-05	0.00467247	0.00637266	2.61698e-05	3.72995e-05
2.3	2	4	0.000928169	0.0208219	7.53e-06	2.75e-05	0.00479336	0.00662783	2.75228e-05	3.79194e-05
2.9	2	4	0.000806463	0.0228735	5.79e-06	3.05e-05	0.00517594	0.00728087	3.04631e-05	3.92471e-05
1.5	2	5	0.00110101	0.0178659	9.47e-06	2.24e-05	0.00436779	0.00568689	2.2411e-05	3.57868e-05
1.7	2	5	0.00103078	0.0189561	8.95e-06	2.45e-05	0.00448219	0.00603391	2.4543e-05	3.66351e-05
1.9	2	5	0.00097263	0.0198703	8.42e-06	2.62e-05	0.00459864	0.00632493	2.62308e-05	3.73172e-05
2.1	2	5	0.000916779	0.020773	7.86e-06	2.78e-05	0.00472247	0.00661224	2.78475e-05	3.81387e-05
2.3	2	5	0.000870092	0.0215115	7.29e-06	2.9e-05	0.0048468	0.00684733	2.90169e-05	3.86273e-05
2.5	2	5	0.000828472	0.0221645	6.71e-06	2.99e-05	0.00497353	0.00705517	2.99284e-05	3.89575e-05
2.7	2	5	0.000785103	0.0228632	6.1e-06	3.09e-05	0.00510881	0.00727757	3.08924e-05	3.94243e-05
1.5	2	6	0.00104968	0.018523	9.33e-06	2.39e-05	0.00439859	0.00589605	2.39107e-05	3.6294e-05
1.7	2	6	0.000980356	0.0195805	8.8e-06	2.6e-05	0.00451648	0.00623266	2.59727e-05	3.71932e-05
1.9	2	6	0.000921048	0.0204909	8.24e-06	2.76e-05	0.00463784	0.00652245	2.76382e-05	3.79446e-05
2.1	2	6	0.000866604	0.0213227	7.66e-06	2.91e-05	0.00476461	0.00678723	2.90552e-05	3.86077e-05
2.3	2	6	0.000817208	0.0220741	7.07e-06	3.02e-05	0.00489545	0.00702641	3.02162e-05	3.91372e-05
2.5	2	6	0.000776705	0.0226619	6.48e-06	3.09e-05	0.00502529	0.00721351	3.09236e-05	3.92928e-05
1.5	2	7	0.000999359	0.0191672	9.2e-06	2.54e-05	0.00442879	0.0061011	2.54167e-05	3.69809e-05
1.7	2	7	0.000933159	0.0201384	8.65e-06	2.73e-05	0.00454857	0.00641024	2.72647e-05	3.77444e-05
1.9	2	7	0.000871718	0.021047	8.07e-06	2.89e-05	0.00467533	0.00669948	2.89035e-05	3.85248e-05
2.3	2	7	0.000769947	0.0225024	6.87e-06	3.11e-05	0.00493893	0.00716275	3.10909e-05	3.9403e-05
2.5	2	7	0.000726811	0.0231067	6.25e-06	3.18e-05	0.00507519	0.0073551	3.17918e-05	3.95963e-05
1.3	2	8	0.00103341	0.0185645	9.62e-06	2.44e-05	0.00433631	0.00590927	2.43841e-05	3.65389e-05
1.5	2	8	0.000952835	0.0197294	9.07e-06	2.67e-05	0.0044567	0.00628005	2.67493e-05	3.7595e-05
1.7	2	8	0.000888626	0.0206241	8.51e-06	2.84e-05	0.00457885	0.00656486	2.83912e-05	3.82098e-05
1.9	2	8	0.000828313	0.0214693	7.92e-06	2.98e-05	0.00470832	0.00683388	2.98439e-05	3.88514e-05
2.1	2	8	0.000775965	0.0221791	7.32e-06	3.09e-05	0.00484075	0.00705983	3.08887e-05	3.92271e-05
2.3	2	8	0.000724844	0.0228775	6.68e-06	3.18e-05	0.00498042	0.00728213	3.18352e-05	3.9622e-05
2.5	2	8	0.000679067	0.0234995	6.03e-06	3.25e-05	0.00512293	0.00748012	3.25335e-05	3.98564e-05
1.5	2	9	0.000913134	0.0201554	8.96e-06	2.78e-05	0.00448052	0.00641566	2.77579e-05	3.79552e-05
1.7	2	9	0.000846581	0.0210533	8.38e-06	2.94e-05	0.00460744	0.00670149	2.9386e-05	3.86211e-05
1.9	2	9	0.000787241	0.0218365	7.78e-06	3.07e-05	0.00473954	0.00695077	3.065e-05	3.91198e-05
2.1	2	9	0.000732103	0.0225516	7.15e-06	3.17e-05	0.00487759	0.00717838	3.16663e-05	3.951e-05
2.3	2	9	0.000682137	0.0231922	6.5e-06	3.24e-05	0.00501971	0.0073823	3.24284e-05	3.97573e-05
1.5	2	10	0.000872589	0.0205859	8.85e-06	2.88e-05	0.00450485	0.00655269	2.87883e-05	3.84128e-05
1.7	2	10	0.000807041	0.0214197	8.26e-06	3.02e-05	0.00463433	0.0068181	3.02255e-05	3.89397e-05
1.9	2	10	0.000748676	0.0221418	7.65e-06	3.13e-05	0.00476885	0.00704796	3.12996e-05	3.9293e-05
1.9	3	-2	0.00188684	0.00889465	1.16e-05	1.19e-05	0.00390384	0.0039576	6.23782e-06	3.47675e-05
2.3	3	-2	0.0017657	0.0113034	1.1e-05	1.25e-05	0.00402284	0.0042551	9.77232e-06	4.07888e-05
1.5	3	-1	0.00192996	0.00811296	1.17e-05	1.18e-05	0.00387043	0.00387406	5.23452e-06	4.19059e-05
1.7	3	-1	0.00183598	0.0101086	1.14e-05	1.21e-05	0.00393466	0.00403464	7.99314e-06	4.25936e-05
1.9	3	-1	0.00163385	0.0154665	1.07e-05	1.8e-05	0.00409611	0.00492314	1.79611e-05	4.44448e-05
2.3	3	-1	0.00145746	0.0145254	9.75e-06	1.5e-05	0.00430642	0.00496404	1.50371e-05	3.5778e-05
1.5	3	0	0.0017468	0.0111792	1.12e-05	1.23e-05	0.00398032	0.00414879	9.66261e-06	4.12734e-05
1.7	3	0	0.00159664	0.0130895	1.07e-05	1.29e-05	0.0040974	0.00444151	1.28603e-05	4.08428e-05
2.3	3	0	0.00132291	0.0173554	9.19e-06	2.08e-05	0.0044302	0.00552441	2.08318e-05	3.72098e-05
1.5	3	1	0.00154079	0.0135868	1.07e-05	1.38e-05	0.00410393	0.00445782	1.38334e-05	3.94592e-05
1.7	3	1	0.00142071	0.0151065	1.02e-05	1.66e-05	0.00421704	0.00480855	1.6626e-05	3.86476e-05
2.3	3	1	0.0011627	0.0178388	8.52e-06	2.12e-05	0.0045776	0.00567825	2.12467e-05	3.61642e-05
2.5	3	1	0.00111299	0.0184241	8.01e-06	2.21e-05	0.00468901	0.00592053	2.20775e-05	3.55893e-05
1.5	3	2	0.00140609	0.0152027	1.03e-05	1.7e-05	0.00418475	0.00483918	1.69738e-05	3.77287e-05
1.7	3	2	0.00133727	0.0163503	9.9e-06	1.92e-05	0.00427378	0.00520447	1.9206e-05	3.72179e-05
1.9	3	2	0.00119298	0.0173172	9.18e-06	2.07e-05	0.00443117	0.00551224	2.07353e-05	3.6517e-05
2.3	3	2	0.00107759	0.018784	8.16e-06	2.31e-05	0.0046559	0.00597913	2.31271e-05	3.59465e-05
1.5	3	3	0.0012666	0.0163629	9.93e-06	1.93e-05	0.00426844	0.00520847	1.92608e-05	3.71077e-05
1.7	3	3	0.00117579	0.0172862	9.4e-06	2.09e-05	0.00438358	0.00550236	2.09e-05	3.61592e-05
2.3	3	3	0.0010034	0.0198548	7.85e-06	2.54e-05	0.00472415	0.00631999	2.54303e-05	3.70069e-05
2.5	3	3	0.000959559	0.0206389	7.31e-06	2.67e-05	0.00484244	0.00656958	2.67373e-05	3.76247e-05
2.9	3	3	0.000883231	0.022016	6.2e-06	2.88e-05	0.00508689	0.00700792	2.87859e-05	3.85717e-05
1.5	3	4	0.0011798	0.0171003	9.69e-06	2.08e-05	0.00432052	0.00544321	2.07693e-05	3.61217e-05
1.7	3	4	0.00110541	0.0179382	9.18e-06	2.22e-05	0.00443144	0.00570989	2.22475e-05	3.56248e-05
2.3	3	4	0.000940333	0.0206796	7.58e-06	2.72e-05	0.00478217	0.00658251	2.7218e-05	3.78081e-05
2.5	3	4	0.000894455	0.0214638	7.01e-06	2.85e-05	0.00490755	0.00683215	2.84898e-05	3.84614e-05
2.9	3	4	0.000820407	0.0227167	5.86e-06	3.02e-05	0.00515977	0.00723096	3.01546e-05	3.91009e-05
1.5	3	5	0.00141031	0.0172252	1.03e-05	2.18e-05	0.00418222	0.00548295	2.1804e-05	3.47016e-05
1.7	3	5	0.00104242	0.018802	8.99e-06	2.42e-05	0.00447428	0.00598486	2.41914e-05	3.64787e-05
1.9	3	5	0.000984308	0.0197203	8.46e-06	2.59e-05	0.00458977	0.00627718	2.58905e-05	3.71505e-05
2.1	3	5	0.000928838	0.0206233	7.9e-06	2.75e-05	0.00471234	0.00656461	2.75126e-05	3.79646e-05
2.3	3	5	0.000882683	0.0213605	7.34e-06	2.87e-05	0.00483521	0.00679924	2.8687e-05	3.84489e-05
1.5	3	6	0.00105754	0.0184332	9.35e-06	2.37e-05	0.00439388	0.00586747	2.37065e-05	3.62701e-05
1.7	3	6	0.000988201	0.0194955	8.82e-06	2.58e-05	0.00451114	0.00620563	2.57807e-05	3.71596e-05
1.9	3	6	0.000929204	0.0204074	8.27e-06	2.75e-05	0.00463165	0.00649587	2.74534e-05	3.79042e-05
2.3	3	6	0.000830176	0.021908	7.12e-06	2.98e-05	0.00488352	0.00697354	2.98444e-05	3.8881e-05
2.5	3	6	0.000786351	0.0225757	6.52e-06	3.08e-05	0.00501565	0.00718606	3.07554e-05	3.92447e-05
1.5	3	7	0.00100711	0.0190761	9.22e-06	2.52e-05	0.00442413	0.0060721	2.52039e-05	3.69083e-05
1.7	3	7	0.000941119	0.0200493	8.67e-06	2.71e-05	0.00454316	0.00638188	2.70588e-05	3.76645e-05
1.9	3	7	0.000880102	0.0209511	8.1e-06	2.87e-05	0.00466896	0.00666894	2.86833e-05	3.8415e-05
2.1	3	7	0.000827196	0.0217212	7.51e-06	2.99e-05	0.00479772	0.00691406	2.99213e-05	3.89334e-05
2.3	3	7	0.000779336	0.0224111	6.91e-06	3.09e-05	0.00493029	0.00713369	3.08997e-05	3.9314e-05
1.3	3	8	0.00104117	0.0184674	9.64e-06	2.42e-05	0.00433227	0.00587836	2.41534e-05	3.64354e-05
1.5	3	8	0.000960612	0.0196355	9.09e-06	2.65e-05	0.00445203	0.00625016	2.6525e-05	3.74831e-05
1.7	3	8	0.000893038	0.020601	8.53e-06	2.83e-05	0.00457585	0.00655751	2.83478e-05	3.82772e-05
1.9	3	8	0.000833133	0.0214468	7.94e-06	2.98e-05	0.00470466	0.00682673	2.98069e-05	3.8916e-05
2.3	3	8	0.000734429	0.0227729	6.72e-06	3.16e-05	0.0049716	0.00724883	3.16077e-05	3.94713e-05
2.5	3	8	0.000685133	0.0234682	6.06e-06	3.25e-05	0.00511687	0.00747016	3.24907e-05	3.98892e-05
1.5	3	9	0.000917318	0.0201274	8.97e-06	2.77e-05	0.00447801	0.00640675	2.76975e-05	3.7996e-05
1.7	3	9	0.000851134	0.0210263	8.4e-06	2.93e-05	0.00460435	0.00669287	2.93319e-05	3.86585e-05
1.9	3	9	0.000792201	0.0218025	7.8e-06	3.06e-05	0.00473577	0.00693994	3.05814e-05	3.91291e-05
2.1	3	9	0.000737472	0.0225244	7.17e-06	3.16e-05	0.00487308	0.00716975	3.16228e-05	3.95431e-05
2.3	3	9	0.000687911	0.0231568	6.53e-06	3.24e-05	0.0050144	0.00737103	3.23682e-05	3.97632e-05
1.5	3	10	0.000880568	0.020486	8.87e-06	2.85e-05	0.00450006	0.00652089	2.85422e-05	3.82426e-05
1.7	3	10	0.000811717	0.0213892	8.27e-06	3.02e-05	0.00463115	0.00680839	3.0162e-05	3.89521e-05
1.9	3	10	0.000753749	0.0221039	7.66e-06	3.12e-05	0.00476499	0.0070359	3.12205e-05	3.92778e-05
2.3	3	10	0.000643851	0.023489	6.34e-06	3.3e-05	0.00505494	0.00747678	3.30017e-05	3.99918e-05
2.3	4	-2	0.00184148	0.0102976	1.14e-05	1.21e-05	0.00395312	0.00408079	8.2558e-06	4.20504e-05
1.7	4	-1	0.00188291	0.00933464	1.16e-05	1.19e-05	0.00390274	0.00395486	6.87215e-06	4.27352e-05
1.9	4	-1	0.00177806	0.0110474	1.12e-05	1.23e-05	0.00398651	0.00416429	9.4212e-06	4.31764e-05
2.3	4	-1	0.00153627	0.0140375	1.01e-05	1.43e-05	0.00423391	0.00478278	1.42964e-05	4.15037e-05
1.5	4	0	0.00179192	0.0105822	1.14e-05	1.21e-05	0.00395325	0.00408113	8.71811e-06	4.15182e-05
1.7	4	0	0.00164953	0.0125262	1.09e-05	1.26e-05	0.00406144	0.0043516	1.18843e-05	4.16792e-05
2.3	4	0	0.00133724	0.0168915	9.25e-06	1.98e-05	0.00441702	0.00537672	1.97957e-05	3.68696e-05
1.5	4	1	0.00157588	0.0132025	1.08e-05	1.31e-05	0.00408287	0.00440518	1.31313e-05	3.98621e-05
1.7	4	1	0.00144667	0.0147985	1.02e-05	1.6e-05	0.00419939	0.00471049	1.60247e-05	3.90399e-05
2.3	4	1	0.00129183	0.019229	9.06e-06	2.54e-05	0.00445879	0.00612077	2.53968e-05	3.90854e-05
1.5	4	2	0.00142426	0.0149769	1.04e-05	1.65e-05	0.00417384	0.00476731	1.6518e-05	3.80266e-05
1.7	4	2	0.00134396	0.0161871	9.92e-06	1.88e-05	0.00426923	0.00515251	1.88455e-05	3.732e-05
1.9	4	2	0.00120623	0.0171744	9.23e-06	2.04e-05	0.00442111	0.00546677	2.04441e-05	3.66061e-05
2.3	4	2	0.00108949	0.018613	8.21e-06	2.28e-05	0.00464495	0.00592472	2.27666e-05	3.58249e-05
1.5	4	3	0.00134879	0.0161067	1.02e-05	1.89e-05	0.00421913	0.00512694	1.88908e-05	3.66202e-05
1.7	4	3	0.00118873	0.0171795	9.44e-06	2.07e-05	0.00437479	0.00546841	2.0687e-05	3.63148e-05
2.3	4	3	0.00101503	0.0196859	7.9e-06	2.51e-05	0.00471345	0.00626623	2.50619e-05	3.68043e-05
2.5	4	3	0.000971349	0.0204716	7.36e-06	2.64e-05	0.00483065	0.00651632	2.63769e-05	3.7415e-05
2.9	4	3	0.000891964	0.0219162	6.24e-06	2.86e-05	0.00507676	0.00697614	2.85901e-05	3.85113e-05
1.5	4	4	0.00119278	0.0170161	9.72e-06	2.06e-05	0.00431273	0.0054164	2.06044e-05	3.63292e-05
1.7	4	4	0.00111349	0.0178312	9.21e-06	2.2e-05	0.00442595	0.00567583	2.2012e-05	3.55612e-05
2.1	4	4	0.000995899	0.0197723	8.16e-06	2.56e-05	0.00465601	0.00629372	2.56242e-05	3.70939e-05
2.3	4	4	0.000948361	0.0205824	7.62e-06	2.7e-05	0.00477479	0.00655159	2.7009e-05	3.77259e-05
2.5	4	4	0.000902832	0.021366	7.05e-06	2.83e-05	0.00489917	0.006801	2.82846e-05	3.8376e-05
2.9	4	4	0.00082567	0.0226937	5.89e-06	3.01e-05	0.00515366	0.00722363	3.01343e-05	3.91954e-05
1.5	4	5	0.00139839	0.0171894	1.03e-05	2.17e-05	0.00418937	0.00547155	2.16749e-05	3.47935e-05
1.7	4	5	0.00105018	0.0186969	9.01e-06	2.4e-05	0.00446899	0.0059514	2.3952e-05	3.63667e-05
1.9	4	5	0.000992065	0.0196182	8.49e-06	2.57e-05	0.00458387	0.00624467	2.56588e-05	3.70317e-05
2.3	4	5	0.000887217	0.0213321	7.36e-06	2.86e-05	0.00483104	0.00679022	2.86383e-05	3.85057e-05
2.5	4	5	0.000846506	0.0219748	6.8e-06	2.95e-05	0.00495549	0.00699479	2.95387e-05	3.88069e-05
1.5	4	6	0.00106533	0.0183242	9.38e-06	2.35e-05	0.0043892	0.00583277	2.34534e-05	3.61253e-05
1.7	4	6	0.000995888	0.0193899	8.84e-06	2.55e-05	0.00450592	0.006172	2.55339e-05	3.70079e-05
1.9	4	6	0.000937068	0.0203022	8.3e-06	2.72e-05	0.00462567	0.00646239	2.72094e-05	3.77474e-05
2.1	4	6	0.000883415	0.0211329	7.73e-06	2.86e-05	0.00475049	0.0067268	2.86337e-05	3.84041e-05
2.3	4	6	0.000834908	0.0218747	7.14e-06	2.98e-05	0.00487917	0.00696292	2.97832e-05	3.89038e-05
2.5	4	6	0.00079139	0.0225416	6.54e-06	3.07e-05	0.00501061	0.00717521	3.06974e-05	3.9266e-05
1.5	4	7	0.00101477	0.0189671	9.24e-06	2.49e-05	0.00441954	0.00603742	2.49445e-05	3.67309e-05
1.7	4	7	0.000945158	0.0200118	8.69e-06	2.7e-05	0.00454041	0.00636996	2.69754e-05	3.76653e-05
1.9	4	7	0.000884393	0.0209139	8.12e-06	2.86e-05	0.0046657	0.00665711	2.86035e-05	3.84128e-05
2.1	4	7	0.00083178	0.0216839	7.53e-06	2.98e-05	0.00479386	0.00690221	2.98453e-05	3.89298e-05
2.3	4	7	0.000784221	0.0223661	6.93e-06	3.08e-05	0.0049258	0.00711936	3.08072e-05	3.92837e-05
1.3	4	8	0.00104508	0.0184242	9.64e-06	2.41e-05	0.00433024	0.0058646	2.40524e-05	3.64204e-05
1.5	4	8	0.000968241	0.0195252	9.11e-06	2.63e-05	0.00444746	0.00621506	2.62568e-05	3.72793e-05
1.7	4	8	0.000897177	0.0205608	8.54e-06	2.83e-05	0.00457304	0.0065447	2.8256e-05	3.82538e-05
1.9	4	8	0.000841317	0.0213352	7.97e-06	2.95e-05	0.00469844	0.00679121	2.95404e-05	3.87062e-05
2.3	4	8	0.000739428	0.0227314	6.74e-06	3.15e-05	0.00496701	0.00723563	3.15255e-05	3.94435e-05
2.7	4	8	0.000647652	0.0240183	5.42e-06	3.3e-05	0.00525726	0.00764528	3.29928e-05	4.00406e-05
1.5	4	9	0.000921307	0.0200844	8.98e-06	2.76e-05	0.00447562	0.00639307	2.75952e-05	3.79555e-05
1.7	4	9	0.000855371	0.0209836	8.41e-06	2.92e-05	0.00460147	0.00667928	2.92328e-05	3.86157e-05
1.9	4	9	0.000796724	0.0217595	7.81e-06	3.05e-05	0.00473233	0.00692627	3.04854e-05	3.90847e-05
2.1	4	9	0.000742283	0.0224735	7.19e-06	3.15e-05	0.00486904	0.00715353	3.1509e-05	3.94714e-05
2.3	4	9	0.00069301	0.0231118	6.55e-06	3.23e-05	0.00500971	0.00735673	3.22768e-05	3.97154e-05
2.5	4	9	0.000645244	0.0237421	5.88e-06	3.3e-05	0.00515676	0.00755734	3.29602e-05	3.9962e-05
1.5	4	10	0.000880935	0.0205099	8.87e-06	2.86e-05	0.00449984	0.00652852	2.86105e-05	3.83702e-05
1.7	4	10	0.000816045	0.0213443	8.29e-06	3.01e-05	0.00462821	0.00679412	3.00565e-05	3.8893e-05
1.9	4	10	0.000754512	0.0221298	7.67e-06	3.13e-05	0.00476441	0.00704414	3.12979e-05	3.94033e-05
2.1	4	10	0.000701107	0.0227854	7.03e-06	3.21e-05	0.00490363	0.00725281	3.21347e-05	3.9645e-05
2.3	4	10	0.00064904	0.0234335	6.36e-06	3.29e-05	0.00505016	0.00745911	3.28811e-05	3.99022e-05

## Sheet: (30,30.3)
																					whole potentials of the equilibrium droplet		the unit length energy barrier
0	0	0	0.001934	0	1.18e-05	1.18e-05	0.003868	0.003868	0	4.70027e-05		(0,0,0)	2.762	-128.7	2.02	3.235	-806.7	-177.5	103.3		2.749e-06		2.9e-06
0.2	0	0	0.00185826	0.00940113	1.17e-05	1.18e-05	0.00387406	0.00388315	7.02215e-06	4.49559e-05		(1,0,0)	-0.7775	620.7	22.04	51.99	2947	721.2	-175.5
0.4	0	0	0.00179856	0.0113936	1.17e-05	1.18e-05	0.00388967	0.00392217	1.02727e-05	4.37953e-05		(0,1,0)	-1.831	-2.875	-0.5132	-0.5747	-17.46	-7.399	1.124
0.8	0	0	0.00167916	0.0128465	1.14e-05	1.29e-05	0.00394955	0.00408917	1.28603e-05	4.17876e-05		(0,0,1)	-1.534	1.789	-0.2461	-0.006471	8.749	6.2	0.1112
1.2	0	0	0.00155976	0.0144571	1.09e-05	1.59e-05	0.00404763	0.00460184	1.5886e-05	3.97556e-05		(2,0,0)	4.247	-817.5	-41	-102.3	-3582	-901.1	167.7
1.6	0	0	0.00144036	0.015654	1.03e-05	1.8e-05	0.00418393	0.00498283	1.80001e-05	3.77892e-05		(1,1,0)	2.829	7.423	1.317	1.986	28.78	17.13	-4.146
2	0	0	0.00120502	0.0171623	9.09e-06	2.03e-05	0.00445118	0.00546293	2.02681e-05	3.68702e-05		(1,0,1)	2.722	-4.464	0.3007	-0.3666	-26.05	-13.32	0.7166
2.1	0	0	0.00117482	0.0175501	8.84e-06	2.09e-05	0.00450571	0.00558636	2.09192e-05	3.66848e-05		(0,2,0)	0.02514	-0.05224	-0.005062	-0.01907	0.04988	-0.05687	0.03876
2.2	0	0	0.00114676	0.017904	8.59e-06	2.15e-05	0.00456078	0.00569903	2.1488e-05	3.64765e-05		(0,1,1)	0.03609	0.08802	0.01185	0.01611	0.395	0.145	-0.004156
2.3	0	0	0.00112055	0.0182292	8.34e-06	2.2e-05	0.00461638	0.00580252	2.19845e-05	3.62509e-05		(0,0,2)	0.02142	-0.02288	0.002094	-0.002892	-0.05116	-0.07995	-0.01868
2.4	0	0	0.00109595	0.0185301	8.08e-06	2.24e-05	0.00467253	0.00589831	2.24186e-05	3.60142e-05		(3,0,0)	-1.187	448.2	29.01	71.67	1843	474.1	-70.95
2.5	0	0	0.0010749	0.0188175	7.84e-06	2.28e-05	0.0047271	0.00601575	2.28268e-05	3.58636e-05		(2,1,0)	-1.53	-6.778	-1.181	-2.018	-17.07	-13.74	3.918
2.6	0	0	0.00105492	0.0190888	7.58e-06	2.32e-05	0.00478225	0.00615362	2.31912e-05	3.57058e-05		(2,0,1)	-1.571	3.733	-0.07686	0.4778	22.01	9.287	-1.113
2.7	0	0	0.0010359	0.0194495	7.33e-06	2.38e-05	0.00483795	0.00629288	2.37688e-05	3.5925e-05		(1,2,0)	-0.02341	0.1165	0.01552	0.03926	0.01746	0.152	-0.03466
2.8	0	0	0.00101965	0.0197589	7.08e-06	2.42e-05	0.00489207	0.00642817	2.42289e-05	3.60432e-05		(1,1,1)	-0.04121	-0.1391	-0.02033	-0.03172	-0.4398	-0.2238	0.02368
2.9	0	0	0.0010023	0.0201055	6.83e-06	2.48e-05	0.00494877	0.00656993	2.47646e-05	3.62701e-05		(1,0,2)	-0.02633	0.02645	-0.002551	0.004098	0.09822	0.112	0.02037
3	0	0	0.000987474	0.0203953	6.57e-06	2.52e-05	0.00500383	0.00670758	2.51685e-05	3.63676e-05		(0,3,0)	-0.0002073	-0.001017	-0.000183	-0.0002987	-0.000351	-0.001545	-0.0006282
3.2	0	0	0.000958107	0.0209974	6.06e-06	2.6e-05	0.00511714	0.00699086	2.60079e-05	3.66609e-05		(0,2,1)	-0.0001519	0.001013	0.0001308	0.0003051	-0.001271	0.0009532	-0.0001472
3.4	0	0	0.000930103	0.0215859	5.53e-06	2.68e-05	0.0052333	0.00728125	2.67889e-05	3.69918e-05		(0,1,2)	-0.0002477	-0.000789	-9.055e-05	-0.0001394	-0.002653	-0.0009667	-0.000102
3.6	0	0	0.000904109	0.0221527	4.99e-06	2.75e-05	0.00535104	0.00757561	2.74983e-05	3.73305e-05		(0,0,3)	-9.258e-05	0.0002154	4.437e-07	3.243e-05	0.0003447	0.0004254	0.0001344
3.8	0	0	0.000878923	0.0227134	4.44e-06	2.82e-05	0.00547172	0.00787729	2.81656e-05	3.76829e-05		(4,0,0)	0.1098	-89	-6.975	-16.85	-345	-91.08	12.05
4	0	0	0.000856296	0.0232371	3.89e-06	2.87e-05	0.00559233	0.00817882	2.87325e-05	3.79947e-05		(3,1,0)	0.31	2.185	0.3696	0.6625	3.747	3.803	-1.042
4.2	0	0	0.00083492	0.0237426	3.34e-06	2.92e-05	0.00571445	0.00848414	2.92366e-05	3.82862e-05		(3,0,1)	0.2825	-1.064	-0.01899	-0.1682	-5.717	-2.085	0.3743
2.3	0	-3	0.00153652	0.0141017	1.01e-05	1.44e-05	0.00423368	0.00478219	1.44283e-05	4.14354e-05		(2,2,0)	0.002903	-0.06593	-0.009579	-0.01998	-0.03586	-0.0797	-0.0003619
1.5	0	-2	0.00184795	0.00990916	1.15e-05	1.2e-05	0.00391963	0.00399707	7.71057e-06	4.17525e-05		(2,1,1)	0.01411	0.05543	0.00903	0.01437	0.1275	0.08765	-0.01151
1.7	0	-2	0.00170923	0.0118885	1.11e-05	1.24e-05	0.00402085	0.00425012	1.08155e-05	4.18654e-05		(2,0,2)	0.007767	-0.00623	0.0007937	-0.001261	-0.03897	-0.03784	-0.005887
2.3	0	-2	0.00137351	0.0161138	9.4e-06	1.82e-05	0.00438365	0.00515713	1.81608e-05	3.60887e-05		(1,3,0)	0.0002246	0.001092	0.0001769	0.0002676	0.0005876	0.0009231	0.0005789
1.5	0	-1	0.00167617	0.0121916	1.1e-05	1.25e-05	0.0040227	0.00425474	1.13688e-05	4.13615e-05		(1,2,1)	-7.86e-05	-0.0009979	-0.0001565	-0.0002695	0.0002076	-0.0009459	-4.328e-06
1.7	0	-1	0.00152001	0.0139923	1.05e-05	1.45e-05	0.00414952	0.00457179	1.45051e-05	3.98461e-05		(1,1,2)	0.0001548	0.0006589	7.971e-05	0.0001289	0.001543	0.0007468	5.077e-07
2.3	0	-1	0.00130668	0.0182785	9.12e-06	2.3e-05	0.00444514	0.00581823	2.30237e-05	3.81287e-05		(1,0,3)	5.808e-05	-0.0001347	1.607e-07	-2.008e-05	-0.0002573	-0.0003045	-6.826e-05
2.5	0	-1	0.00118026	0.0178725	8.32e-06	2.11e-05	0.00462174	0.00575235	2.1106e-05	3.6406e-05		(0,4,0)	-1.612e-06	-3.862e-06	-5.719e-07	-3.574e-07	-9.096e-06	5.999e-06	7.359e-08
1.5	0	1	0.00140443	0.0153504	1.03e-05	1.73e-05	0.00418574	0.00488618	1.73008e-05	3.77106e-05		(0,3,1)	3.376e-06	5.723e-06	1.23e-06	1.171e-06	7.573e-06	3.913e-06	1.652e-06
1.7	0	1	0.00133724	0.0164613	9.9e-06	1.95e-05	0.0042738	0.00523979	1.94675e-05	3.70462e-05		(0,2,2)	8.979e-08	-3.58e-06	-4.911e-07	-9.922e-07	4.482e-06	-2.544e-06	4.358e-07
1.9	0	1	0.00118564	0.0174125	9.16e-06	2.09e-05	0.00443675	0.00554256	2.09358e-05	3.63545e-05		(0,1,3)	5.322e-07	1.735e-06	1.927e-07	3.393e-07	5.299e-06	2.011e-06	4.899e-07
2.3	0	1	0.00107085	0.0189687	8.13e-06	2.35e-05	0.0046621	0.00603792	2.35499e-05	3.62199e-05		(0,0,4)	1.193e-07	-5.866e-07	-2.358e-08	-9.148e-08	-9.89e-07	-7.624e-07	-3.42e-07
1.5	0	2	0.00135047	0.0162514	1.02e-05	1.92e-05	0.00421812	0.00517299	1.92365e-05	3.65411e-05
1.7	0	2	0.00118129	0.0173072	9.42e-06	2.1e-05	0.00437984	0.00550904	2.09698e-05	3.62486e-05
2.3	0	2	0.00100808	0.0198457	7.87e-06	2.54e-05	0.00471985	0.00631708	2.54324e-05	3.69903e-05
2.7	0	2	0.000922556	0.0213669	6.77e-06	2.79e-05	0.00496036	0.0068013	2.78963e-05	3.81759e-05
2.9	0	2	0.000883381	0.0220761	6.2e-06	2.89e-05	0.00508672	0.00702703	2.89443e-05	3.87161e-05
1.5	0	3	0.00118972	0.0170638	9.72e-06	2.07e-05	0.00431457	0.00543159	2.07108e-05	3.61997e-05
1.7	0	3	0.00111467	0.0178833	9.21e-06	2.21e-05	0.00442515	0.00569242	2.21451e-05	3.56074e-05
2.1	0	3	0.000996649	0.0198186	8.16e-06	2.57e-05	0.00465537	0.00630845	2.57481e-05	3.71486e-05
2.3	0	3	0.000948769	0.0206209	7.62e-06	2.71e-05	0.00477441	0.00656385	2.71125e-05	3.77588e-05
2.5	0	3	0.000902833	0.0214044	7.05e-06	2.84e-05	0.00489917	0.00681324	2.83865e-05	3.84117e-05
2.9	0	3	0.000824877	0.0227332	5.89e-06	3.02e-05	0.00515458	0.00723619	3.0233e-05	3.92337e-05
1.5	0	4	0.00140479	0.0171878	1.03e-05	2.17e-05	0.00418552	0.00547103	2.16915e-05	3.4823e-05
1.7	0	4	0.00105514	0.0186995	9.03e-06	2.4e-05	0.00446562	0.00595223	2.39781e-05	3.64087e-05
1.9	0	4	0.000996753	0.0196208	8.5e-06	2.57e-05	0.00458031	0.00624548	2.56871e-05	3.70745e-05
2.3	0	4	0.00089142	0.0213273	7.38e-06	2.87e-05	0.00482717	0.00678869	2.86509e-05	3.85241e-05
2.5	0	4	0.000850523	0.0219696	6.81e-06	2.96e-05	0.00495148	0.00699314	2.95516e-05	3.88254e-05
1.5	0	5	0.0010743	0.0182758	9.4e-06	2.34e-05	0.00438382	0.00581736	2.33601e-05	3.61159e-05
1.7	0	5	0.00100448	0.0193435	8.87e-06	2.54e-05	0.00450008	0.00615724	2.54474e-05	3.69955e-05
1.9	0	5	0.000945481	0.0202493	8.33e-06	2.71e-05	0.00461927	0.00644556	2.71086e-05	3.77067e-05
2.3	0	5	0.000843236	0.0218204	7.18e-06	2.97e-05	0.0048715	0.00694564	2.96875e-05	3.88616e-05
2.5	0	5	0.000799728	0.0224788	6.58e-06	3.06e-05	0.00500227	0.00715522	3.0584e-05	3.91979e-05
1.5	0	6	0.00102353	0.0189308	9.26e-06	2.49e-05	0.00441428	0.00602585	2.48805e-05	3.67899e-05
1.7	0	6	0.000957451	0.0199068	8.72e-06	2.67e-05	0.00453205	0.00633654	2.67463e-05	3.75357e-05
1.9	0	6	0.000896719	0.0208155	8.16e-06	2.84e-05	0.00465633	0.00662579	2.83973e-05	3.83061e-05
2.3	0	6	0.000793022	0.0223315	6.97e-06	3.08e-05	0.0049177	0.00710835	3.07686e-05	3.93326e-05
2.5	0	6	0.000750795	0.0229319	6.36e-06	3.15e-05	0.0050512	0.00729947	3.14813e-05	3.95207e-05
1.3	0	7	0.00105787	0.0183295	9.67e-06	2.38e-05	0.00432359	0.00583446	2.38445e-05	3.63729e-05
1.5	0	7	0.00098066	0.0194345	9.14e-06	2.61e-05	0.00444	0.00618619	2.60601e-05	3.72232e-05
1.7	0	7	0.000909611	0.0204712	8.58e-06	2.81e-05	0.00456459	0.00651617	2.80664e-05	3.81924e-05
1.9	0	7	0.000850213	0.0213095	8e-06	2.95e-05	0.00469168	0.00678302	2.95158e-05	3.88006e-05
2.1	0	7	0.000798866	0.0220177	7.41e-06	3.06e-05	0.00482151	0.00700845	3.05757e-05	3.91709e-05
2.3	0	7	0.000748778	0.0227053	6.78e-06	3.15e-05	0.0049584	0.00722733	3.15145e-05	3.95347e-05
2.5	0	7	0.000704012	0.0233223	6.15e-06	3.22e-05	0.00509799	0.00742372	3.22233e-05	3.97619e-05
1.5	0	8	0.000937462	0.0199371	9.03e-06	2.73e-05	0.00446592	0.00634616	2.7255e-05	3.77648e-05
1.7	0	8	0.000868083	0.0209063	8.45e-06	2.91e-05	0.00459282	0.00665468	2.90772e-05	3.86046e-05
1.9	0	8	0.00080981	0.021682	7.86e-06	3.03e-05	0.00472238	0.00690159	3.03386e-05	3.90705e-05
2.1	0	8	0.000755772	0.0223947	7.24e-06	3.14e-05	0.00485771	0.00712845	3.13698e-05	3.94541e-05
2.3	0	8	0.000706924	0.0230235	6.61e-06	3.21e-05	0.00499691	0.00732862	3.21232e-05	3.96698e-05
2.5	0	8	0.000659587	0.0236508	5.94e-06	3.28e-05	0.00514241	0.00752828	3.28114e-05	3.99127e-05
1.5	0	9	0.000897273	0.020373	8.92e-06	2.83e-05	0.00449004	0.00648492	2.82959e-05	3.82159e-05
1.7	0	9	0.000829106	0.021277	8.33e-06	2.99e-05	0.00461933	0.00677269	2.99298e-05	3.89187e-05
1.9	0	9	0.000771913	0.0219837	7.73e-06	3.1e-05	0.00475119	0.00699764	3.09809e-05	3.9214e-05
2.1	0	9	0.000715163	0.0227089	7.09e-06	3.2e-05	0.00489182	0.00722848	3.20056e-05	3.9638e-05
2.3	0	9	0.000663618	0.0233545	6.42e-06	3.28e-05	0.00503675	0.00743396	3.27582e-05	3.98921e-05
1.5	0	10	0.000859905	0.0207506	8.81e-06	2.92e-05	0.00451246	0.00660511	2.91976e-05	3.85901e-05
1.7	0	10	0.000792754	0.0215841	8.21e-06	3.06e-05	0.00464405	0.00687043	3.06212e-05	3.91259e-05
1.9	0	10	0.000732785	0.0223011	7.59e-06	3.17e-05	0.00478092	0.00709866	3.1663e-05	3.94613e-05
2.1	0	10	0.000677205	0.0229685	6.94e-06	3.25e-05	0.00492371	0.0073111	3.25044e-05	3.97394e-05
2.3	0	10	0.000622963	0.0236313	6.25e-06	3.33e-05	0.00507415	0.00752208	3.32594e-05	4.00306e-05
2.5	0	10	0.000574389	0.0242145	5.56e-06	3.38e-05	0.00522761	0.00770772	3.37529e-05	4.01358e-05
2.7	0	10	0.000528499	0.0247804	4.83e-06	3.41e-05	0.00538594	0.00788784	3.41496e-05	4.02005e-05
2.3	1	-4	0.00192149	0.00855421	1.17e-05	1.18e-05	0.00387951	0.00389678	5.80575e-06	4.32447e-05
1.9	1	-3	0.00188505	0.00925403	1.16e-05	1.19e-05	0.0039052	0.00396101	6.74971e-06	3.52187e-05
2.3	1	-3	0.00174608	0.011618	1.1e-05	1.25e-05	0.00404089	0.00430022	1.02768e-05	4.03381e-05
1.3	1	-2	0.00187548	0.0167032	1.16e-05	2.2e-05	0.00389843	0.00531678	2.20281e-05	6.27071e-05
1.7	1	-2	0.00185479	0.00993808	1.15e-05	1.2e-05	0.00392187	0.00400266	7.75119e-06	4.26222e-05
1.9	1	-2	0.00166035	0.0149691	1.08e-05	1.69e-05	0.00407598	0.00476483	1.69099e-05	4.3783e-05
2.3	1	-2	0.00148215	0.0143561	9.86e-06	1.48e-05	0.0042837	0.00490725	1.47706e-05	3.61976e-05
1.5	1	-1	0.00179151	0.0106895	1.14e-05	1.21e-05	0.00395349	0.00408173	8.8953e-06	4.14873e-05
1.7	1	-1	0.00164911	0.0126152	1.09e-05	1.26e-05	0.00406173	0.00435231	1.20529e-05	4.16438e-05
2.3	1	-1	0.0013403	0.0169832	9.26e-06	2e-05	0.0044142	0.00540593	2.0025e-05	3.70012e-05
1.5	1	0	0.00159824	0.0130304	1.08e-05	1.28e-05	0.00406946	0.00437164	1.28345e-05	4.00413e-05
1.7	1	0	0.00146468	0.0146581	1.03e-05	1.58e-05	0.00418714	0.00466585	1.57701e-05	3.92159e-05
2.3	1	0	0.00129731	0.0190914	9.08e-06	2.51e-05	0.00445375	0.00607699	2.50651e-05	3.90104e-05
2.5	1	0	0.00114676	0.0182071	8.16e-06	2.17e-05	0.00465524	0.00583611	2.17318e-05	3.60651e-05
1.5	1	1	0.001451	0.014727	1.04e-05	1.6e-05	0.0041578	0.00468775	1.60352e-05	3.83459e-05
1.7	1	1	0.00136194	0.0160003	9.98e-06	1.85e-05	0.004257	0.00509306	1.84686e-05	3.76117e-05
2.3	1	1	0.00111063	0.0183703	8.3e-06	2.23e-05	0.0046255	0.00584743	2.22782e-05	3.56053e-05
2.5	1	1	0.00106241	0.019247	7.78e-06	2.38e-05	0.00473959	0.0061265	2.38114e-05	3.62969e-05
1.5	1	2	0.00137019	0.0158795	1.02e-05	1.84e-05	0.00420628	0.0050546	1.84199e-05	3.71105e-05
1.7	1	2	0.00132492	0.0168231	9.86e-06	2.03e-05	0.00428217	0.00535494	2.02908e-05	3.6342e-05
1.9	1	2	0.0011435	0.0177584	9.01e-06	2.16e-05	0.00446878	0.00565268	2.1609e-05	3.58357e-05
2.3	1	2	0.00103551	0.0194765	7.98e-06	2.46e-05	0.00469461	0.00619956	2.46395e-05	3.66905e-05
2.5	1	2	0.000991807	0.0202589	7.46e-06	2.6e-05	0.00481019	0.00644862	2.59536e-05	3.7264e-05
2.9	1	2	0.000913127	0.0217008	6.35e-06	2.82e-05	0.00505221	0.00690759	2.81855e-05	3.83467e-05
1.5	1	3	0.00122524	0.0168058	9.81e-06	2.02e-05	0.00429325	0.00534945	2.01942e-05	3.66989e-05
1.7	1	3	0.00113923	0.0176442	9.29e-06	2.16e-05	0.00440845	0.00561631	2.1644e-05	3.57497e-05
1.9	1	3	0.00107498	0.0185936	8.78e-06	2.34e-05	0.00452086	0.00591852	2.33961e-05	3.61629e-05
2.1	1	3	0.00102011	0.0195145	8.25e-06	2.51e-05	0.00463567	0.00621165	2.50798e-05	3.68823e-05
2.3	1	3	0.00169051	0.020976	1.07e-05	3.31e-05	0.00409201	0.00667688	3.30707e-05	3.95739e-05
2.9	1	3	0.000851954	0.0224127	6.03e-06	2.96e-05	0.00512317	0.00713418	2.95923e-05	3.89031e-05
1.5	1	4	0.00115125	0.0174081	9.61e-06	2.14e-05	0.00433765	0.00554115	2.14337e-05	3.58661e-05
1.7	1	4	0.00107869	0.0183741	9.1e-06	2.32e-05	0.00444961	0.00584865	2.324e-05	3.60462e-05
2.3	1	4	0.000912304	0.0210869	7.47e-06	2.81e-05	0.00480796	0.00671218	2.81329e-05	3.8299e-05
2.5	1	4	0.000868598	0.021801	6.9e-06	2.92e-05	0.0049334	0.00693948	2.92195e-05	3.87795e-05
2.7	1	4	0.000830841	0.0224081	6.32e-06	3e-05	0.00505941	0.00713272	3.00042e-05	3.90307e-05
2.9	1	4	0.00079133	0.0230743	5.71e-06	3.09e-05	0.0051935	0.00734476	3.08801e-05	3.94554e-05
1.5	1	5	0.00109021	0.0180821	9.44e-06	2.29e-05	0.00437428	0.00575572	2.29207e-05	3.60245e-05
1.7	1	5	0.00102388	0.0190901	8.93e-06	2.49e-05	0.00448688	0.00607656	2.48632e-05	3.67045e-05
1.9	1	5	0.000961507	0.0200713	8.38e-06	2.67e-05	0.0046071	0.00638888	2.67106e-05	3.75837e-05
2.1	1	5	0.000908562	0.0209011	7.83e-06	2.81e-05	0.00472937	0.00665303	2.81469e-05	3.82306e-05
2.3	1	5	0.000860958	0.0216404	7.25e-06	2.93e-05	0.0048552	0.00688836	2.93091e-05	3.87247e-05
2.7	1	5	0.000774071	0.0229968	6.04e-06	3.12e-05	0.00512072	0.00732012	3.11719e-05	3.95279e-05
1.5	1	6	0.00162199	0.0174366	1.09e-05	2.31e-05	0.00405521	0.00555023	2.30644e-05	3.39556e-05
1.7	1	6	0.000973188	0.0197188	8.77e-06	2.63e-05	0.00452135	0.0062767	2.63105e-05	3.73392e-05
1.9	1	6	0.000913127	0.020621	8.22e-06	2.8e-05	0.00464386	0.00656388	2.79508e-05	3.80741e-05
2.3	1	6	0.000811252	0.0221323	7.04e-06	3.03e-05	0.00490093	0.00704494	3.03378e-05	3.90918e-05
2.5	1	6	0.00076599	0.0228043	6.43e-06	3.12e-05	0.00503601	0.00725883	3.12381e-05	3.94605e-05
1.3	1	7	0.00107357	0.0181249	9.71e-06	2.34e-05	0.00431542	0.00576934	2.33617e-05	3.61336e-05
1.5	1	7	0.000992434	0.0193072	9.18e-06	2.58e-05	0.00443294	0.00614567	2.57636e-05	3.71513e-05
1.7	1	7	0.000925593	0.0202761	8.63e-06	2.76e-05	0.00455372	0.00645407	2.76051e-05	3.79254e-05
1.9	1	7	0.000867014	0.0211134	8.06e-06	2.91e-05	0.00467891	0.00672059	2.90616e-05	3.85274e-05
2.3	1	7	0.000763486	0.0225771	6.84e-06	3.13e-05	0.00494487	0.00718652	3.12554e-05	3.94383e-05
2.5	1	7	0.000719533	0.0231832	6.22e-06	3.2e-05	0.00508247	0.00737944	3.19505e-05	3.9635e-05
1.5	1	8	0.000949345	0.0198044	9.06e-06	2.69e-05	0.00445879	0.00630395	2.69397e-05	3.76331e-05
1.7	1	8	0.000880623	0.0207746	8.49e-06	2.88e-05	0.0045843	0.00661277	2.877e-05	3.8465e-05
1.9	1	8	0.000823153	0.0215424	7.9e-06	3e-05	0.00471224	0.00685716	3.00201e-05	3.89006e-05
2.1	1	8	0.000769938	0.022253	7.29e-06	3.11e-05	0.00484581	0.00708334	3.10587e-05	3.92799e-05
2.3	1	8	0.000717946	0.022953	6.65e-06	3.2e-05	0.00498677	0.00730615	3.19997e-05	3.9678e-05
1.5	1	9	0.000909328	0.0202351	8.95e-06	2.8e-05	0.0044828	0.00644102	2.79625e-05	3.80346e-05
1.7	1	9	0.000841908	0.0211392	8.37e-06	2.96e-05	0.00461062	0.00672882	2.9604e-05	3.87317e-05
1.9	1	9	0.000781677	0.0219157	7.76e-06	3.08e-05	0.00474376	0.00697599	3.08425e-05	3.92083e-05
2.3	1	9	0.000674847	0.0232753	6.47e-06	3.26e-05	0.00502642	0.00740876	3.26121e-05	3.98535e-05
1.5	1	10	0.00086844	0.0206767	8.84e-06	2.9e-05	0.00450734	0.00658159	2.90255e-05	3.85526e-05
1.7	1	10	0.000801996	0.0215106	8.24e-06	3.05e-05	0.00463776	0.00684703	3.0458e-05	3.90841e-05
1.9	1	10	0.000742748	0.0222267	7.63e-06	3.15e-05	0.00477335	0.00707499	3.15073e-05	3.94157e-05
2.1	1	10	0.000687891	0.0228846	6.98e-06	3.23e-05	0.00491473	0.0072844	3.23334e-05	3.96641e-05
2.3	1	10	0.000634372	0.0235443	6.3e-06	3.31e-05	0.00506366	0.00749438	3.30925e-05	3.99522e-05
2.5	1	10	0.000586514	0.0241237	5.61e-06	3.36e-05	0.00521549	0.00767882	3.35897e-05	4.00549e-05
2.7	1	10	0.000537019	0.024765	4.88e-06	3.42e-05	0.00537674	0.00788295	3.41752e-05	4.0309e-05
2.9	1	10	0.000494608	0.0252931	4.14e-06	3.44e-05	0.00553769	0.00805104	3.44386e-05	4.02769e-05
2.3	2	0	0.00130464	0.0182832	9.11e-06	2.3e-05	0.00444701	0.00581973	2.30252e-05	3.82963e-05
1.5	2	1	0.00149671	0.0141352	1.06e-05	1.49e-05	0.00413038	0.00452394	1.48738e-05	3.8814e-05
1.7	2	1	0.00139521	0.0155263	1.01e-05	1.75e-05	0.00423438	0.00494217	1.74877e-05	3.82057e-05
2.3	2	1	0.00114319	0.0180815	8.44e-06	2.17e-05	0.00459554	0.00575551	2.17363e-05	3.59614e-05
2.5	2	1	0.00109412	0.0187665	7.92e-06	2.28e-05	0.00470789	0.00597355	2.2805e-05	3.58458e-05
1.5	2	2	0.00139276	0.015513	1.03e-05	1.76e-05	0.00419274	0.00493795	1.76387e-05	3.75123e-05
1.7	2	2	0.00125317	0.0167013	9.64e-06	1.98e-05	0.00433097	0.0053162	1.97609e-05	3.71281e-05
1.9	2	2	0.00117282	0.017515	9.11e-06	2.11e-05	0.00444649	0.00557518	2.11334e-05	3.61843e-05
2.3	2	2	0.00141248	0.0207423	9.56e-06	3.04e-05	0.0043478	0.00660247	3.03554e-05	4.0021e-05
2.5	2	2	0.0010154	0.0199383	7.56e-06	2.53e-05	0.0047866	0.00634655	2.52758e-05	3.69861e-05
2.9	2	2	0.000937968	0.0213803	6.49e-06	2.75e-05	0.0050234	0.00680557	2.75367e-05	3.8044e-05
1.5	2	3	0.00134596	0.0164102	1.01e-05	1.96e-05	0.00422082	0.00522353	1.96011e-05	3.63364e-05
1.7	2	3	0.00116424	0.0174497	9.37e-06	2.13e-05	0.00439144	0.00555442	2.12569e-05	3.60572e-05
2.3	2	3	0.000992461	0.0200656	7.8e-06	2.59e-05	0.00473422	0.00638709	2.59124e-05	3.72469e-05
2.5	2	3	0.000948059	0.0208408	7.26e-06	2.72e-05	0.00485394	0.00663383	2.7191e-05	3.78502e-05
2.7	2	3	0.000909901	0.0215107	6.71e-06	2.82e-05	0.00497403	0.00684708	2.81858e-05	3.8265e-05
2.9	2	3	0.000870151	0.0222223	6.13e-06	2.92e-05	0.00510207	0.00707356	2.92286e-05	3.88089e-05
1.5	2	4	0.00117236	0.0172417	9.67e-06	2.11e-05	0.00432498	0.00548821	2.10911e-05	3.61067e-05
1.7	2	4	0.00141115	0.0175266	1.01e-05	2.23e-05	0.00422353	0.00557889	2.23438e-05	3.50112e-05
2.1	2	4	0.000980904	0.0200143	8.1e-06	2.62e-05	0.0046686	0.00637076	2.61779e-05	3.7311e-05
2.3	2	4	0.000932549	0.0208156	7.55e-06	2.75e-05	0.00478933	0.00662582	2.75317e-05	3.79316e-05
2.9	2	4	0.000810269	0.0228663	5.81e-06	3.05e-05	0.00517153	0.00727858	3.04737e-05	3.92608e-05
1.5	2	5	0.00110621	0.0178681	9.49e-06	2.24e-05	0.00436468	0.00568759	2.24335e-05	3.58228e-05
1.7	2	5	0.00103565	0.0189581	8.97e-06	2.46e-05	0.00447888	0.00603454	2.45676e-05	3.66719e-05
1.9	2	5	0.000977218	0.0198721	8.44e-06	2.63e-05	0.00459515	0.00632549	2.62571e-05	3.73548e-05
2.1	2	5	0.000921104	0.0207676	7.87e-06	2.79e-05	0.00471883	0.00661052	2.78566e-05	3.81512e-05
2.3	2	5	0.000874198	0.0215058	7.31e-06	2.9e-05	0.00484302	0.00684552	2.90267e-05	3.86404e-05
2.5	2	5	0.000832381	0.0221585	6.73e-06	2.99e-05	0.00496962	0.00705327	2.99387e-05	3.89709e-05
2.7	2	5	0.000788808	0.022857	6.11e-06	3.09e-05	0.00510481	0.0072756	3.09032e-05	3.94382e-05
1.5	2	6	0.00105464	0.0185256	9.35e-06	2.39e-05	0.00439562	0.00589689	2.39347e-05	3.63305e-05
1.7	2	6	0.000984982	0.0195829	8.81e-06	2.6e-05	0.00451333	0.00623344	2.59987e-05	3.72304e-05
1.9	2	6	0.000925394	0.0204863	8.26e-06	2.76e-05	0.00463454	0.00652098	2.76472e-05	3.79569e-05
2.1	2	6	0.000870693	0.0213178	7.68e-06	2.91e-05	0.00476118	0.00678568	2.9065e-05	3.86208e-05
2.3	2	6	0.000821064	0.022069	7.08e-06	3.02e-05	0.0048919	0.00702478	3.02266e-05	3.91507e-05
2.5	2	6	0.00078037	0.0226565	6.49e-06	3.09e-05	0.00502163	0.00721179	3.09344e-05	3.93066e-05
1.5	2	7	0.00100408	0.0191636	9.21e-06	2.54e-05	0.00442595	0.00609995	2.54245e-05	3.69922e-05
1.7	2	7	0.000937562	0.0201344	8.66e-06	2.73e-05	0.00454558	0.00640898	2.72734e-05	3.77565e-05
1.9	2	7	0.000875831	0.0210428	8.09e-06	2.89e-05	0.00467221	0.00669814	2.89131e-05	3.85377e-05
2.3	2	7	0.00077358	0.0224978	6.89e-06	3.11e-05	0.00493559	0.00716129	3.11018e-05	3.94169e-05
2.5	2	7	0.00073024	0.023102	6.27e-06	3.18e-05	0.00507176	0.00735359	3.18031e-05	3.96104e-05
1.3	2	8	0.00103829	0.0185615	9.63e-06	2.44e-05	0.00433377	0.00590831	2.43913e-05	3.65497e-05
1.5	2	8	0.00095733	0.0197261	9.08e-06	2.68e-05	0.004454	0.00627902	2.67578e-05	3.76069e-05
1.7	2	8	0.000892819	0.0206275	8.52e-06	2.84e-05	0.004576	0.00656593	2.84196e-05	3.82481e-05
1.9	2	8	0.000832221	0.0214655	7.93e-06	2.99e-05	0.00470535	0.00683268	2.98541e-05	3.88646e-05
2.1	2	8	0.000779625	0.0221751	7.33e-06	3.09e-05	0.00483767	0.00705856	3.08994e-05	3.92407e-05
2.3	2	8	0.000728263	0.0228734	6.7e-06	3.18e-05	0.00497728	0.00728083	3.18465e-05	3.96361e-05
2.5	2	8	0.000682271	0.0234878	6.05e-06	3.25e-05	0.00511973	0.0074764	3.25243e-05	3.98452e-05
1.5	2	9	0.000917443	0.0201524	8.97e-06	2.78e-05	0.00447793	0.00641471	2.77669e-05	3.79674e-05
1.7	2	9	0.000850575	0.0210501	8.39e-06	2.94e-05	0.00460473	0.00670047	2.93959e-05	3.86341e-05
1.9	2	9	0.000790955	0.0218331	7.79e-06	3.07e-05	0.00473671	0.00694969	3.06606e-05	3.91333e-05
2.1	2	9	0.000735557	0.0225481	7.16e-06	3.17e-05	0.00487469	0.00717727	3.16775e-05	3.9524e-05
2.3	2	9	0.000685355	0.0231886	6.52e-06	3.24e-05	0.00501675	0.00738117	3.24401e-05	3.97717e-05
2.5	2	9	0.000636665	0.023822	5.84e-06	3.31e-05	0.00516534	0.00758277	3.31194e-05	4.00225e-05
1.5	2	10	0.000876706	0.0205901	8.86e-06	2.88e-05	0.00450238	0.00655403	2.88171e-05	3.84512e-05
1.7	2	10	0.000810849	0.0214239	8.27e-06	3.03e-05	0.00463174	0.00681945	3.02559e-05	3.89788e-05
1.9	2	10	0.000752208	0.0221388	7.66e-06	3.13e-05	0.00476616	0.00704699	3.13105e-05	3.93068e-05
2.3	2	10	0.000640981	0.0235186	6.33e-06	3.31e-05	0.00505758	0.00748622	3.30655e-05	4e-05
1.9	3	-2	0.00189574	0.00889827	1.16e-05	1.19e-05	0.00389707	0.00394069	6.25378e-06	3.48565e-05
2.3	3	-2	0.00177403	0.0112981	1.11e-05	1.24e-05	0.00401517	0.00423594	9.78212e-06	4.08297e-05
1.9	3	-1	0.00164156	0.0154675	1.07e-05	1.8e-05	0.00409026	0.00492347	1.79899e-05	4.4516e-05
2.3	3	-1	0.00146434	0.0145214	9.78e-06	1.51e-05	0.00430009	0.00494823	1.50522e-05	3.58138e-05
1.5	3	0	0.00175505	0.0111778	1.13e-05	1.22e-05	0.00397537	0.00413643	9.67232e-06	4.13148e-05
1.7	3	0	0.00160418	0.0130876	1.07e-05	1.29e-05	0.00409228	0.0044287	1.28732e-05	4.08837e-05
2.3	3	0	0.00132915	0.0173521	9.21e-06	2.09e-05	0.00442446	0.00552336	2.08527e-05	3.72471e-05
1.5	3	1	0.00154806	0.0135862	1.07e-05	1.38e-05	0.00409957	0.00444691	1.38473e-05	3.94988e-05
1.7	3	1	0.00142742	0.0151056	1.02e-05	1.66e-05	0.00421248	0.00480825	1.66427e-05	3.86863e-05
2.3	3	1	0.00116818	0.0178371	8.54e-06	2.13e-05	0.00457255	0.00567772	2.12681e-05	3.62005e-05
2.5	3	1	0.00111824	0.018422	8.03e-06	2.21e-05	0.00468376	0.0059074	2.20997e-05	3.5625e-05
1.5	3	2	0.00141272	0.0152028	1.03e-05	1.7e-05	0.00418077	0.00483921	1.69908e-05	3.77665e-05
1.7	3	2	0.00134358	0.0163499	9.92e-06	1.92e-05	0.00426949	0.00520434	1.92253e-05	3.72552e-05
1.9	3	2	0.00119861	0.017317	9.2e-06	2.08e-05	0.00442689	0.00551217	2.07561e-05	3.65536e-05
2.3	3	2	0.00108267	0.0187831	8.18e-06	2.32e-05	0.00465122	0.00597884	2.31503e-05	3.59827e-05
1.5	3	3	0.00127258	0.0163639	9.94e-06	1.93e-05	0.00426485	0.0052088	1.92802e-05	3.7145e-05
1.7	3	3	0.00118134	0.0172869	9.42e-06	2.09e-05	0.00437981	0.00550261	2.0921e-05	3.61954e-05
2.3	3	3	0.00100814	0.0198547	7.87e-06	2.55e-05	0.00471979	0.00631995	2.54558e-05	3.70439e-05
2.5	3	3	0.000964087	0.0206315	7.33e-06	2.67e-05	0.00483791	0.00656721	2.67458e-05	3.76366e-05
2.9	3	3	0.000887399	0.0220078	6.22e-06	2.88e-05	0.00508206	0.0070053	2.87955e-05	3.85846e-05
1.5	3	4	0.00118536	0.017102	9.7e-06	2.08e-05	0.00431718	0.00544373	2.07902e-05	3.61579e-05
1.7	3	4	0.00111063	0.0179395	9.2e-06	2.23e-05	0.00442789	0.00571031	2.22698e-05	3.56605e-05
2.3	3	4	0.00094477	0.0206731	7.6e-06	2.72e-05	0.00477809	0.00658045	2.72267e-05	3.78202e-05
2.5	3	4	0.000898676	0.0214571	7.03e-06	2.85e-05	0.00490332	0.00683	2.84993e-05	3.84742e-05
2.9	3	4	0.000824278	0.0227093	5.88e-06	3.02e-05	0.00515528	0.00722861	3.0165e-05	3.91144e-05
1.5	3	5	0.00141696	0.0172253	1.03e-05	2.18e-05	0.00417822	0.00548297	2.18258e-05	3.47364e-05
1.7	3	5	0.00104733	0.0188038	9e-06	2.42e-05	0.00447093	0.00598545	2.42156e-05	3.65151e-05
1.9	3	5	0.000988953	0.019722	8.48e-06	2.59e-05	0.00458624	0.00627771	2.59165e-05	3.71878e-05
2.1	3	5	0.000933221	0.0206178	7.92e-06	2.75e-05	0.00470865	0.00656285	2.75215e-05	3.79769e-05
2.3	3	5	0.000886848	0.0213546	7.36e-06	2.87e-05	0.00483138	0.00679738	2.86965e-05	3.84617e-05
1.5	3	6	0.00106252	0.0184357	9.37e-06	2.37e-05	0.00439089	0.00586828	2.37302e-05	3.63065e-05
1.7	3	6	0.000992863	0.019498	8.83e-06	2.58e-05	0.00450797	0.00620639	2.58066e-05	3.71969e-05
1.9	3	6	0.000933589	0.0204027	8.29e-06	2.75e-05	0.00462831	0.00649438	2.74623e-05	3.79165e-05
2.3	3	6	0.000834092	0.02191	7.14e-06	2.99e-05	0.00487992	0.00697417	2.98744e-05	3.892e-05
2.5	3	6	0.000790061	0.0225702	6.54e-06	3.08e-05	0.00501194	0.00718431	3.07661e-05	3.92583e-05
1.5	3	7	0.00101187	0.0190724	9.23e-06	2.52e-05	0.00442128	0.00607092	2.52115e-05	3.69194e-05
1.7	3	7	0.00094556	0.0200453	8.69e-06	2.71e-05	0.00454014	0.00638062	2.70675e-05	3.76765e-05
1.9	3	7	0.000884255	0.0209538	8.12e-06	2.87e-05	0.00466581	0.0066698	2.8712e-05	3.84534e-05
2.1	3	7	0.000831099	0.0217167	7.53e-06	2.99e-05	0.00479444	0.00691264	2.99316e-05	3.89468e-05
2.3	3	7	0.000783013	0.0224064	6.93e-06	3.09e-05	0.00492691	0.00713219	3.09105e-05	3.93278e-05
1.3	3	8	0.00104608	0.0184644	9.65e-06	2.42e-05	0.00432972	0.00587739	2.41605e-05	3.6446e-05
1.5	3	8	0.000965145	0.0196322	9.1e-06	2.65e-05	0.00444931	0.00624911	2.65334e-05	3.74949e-05
1.7	3	8	0.000897252	0.0205974	8.54e-06	2.84e-05	0.00457299	0.00655636	2.83571e-05	3.82898e-05
1.9	3	8	0.000837064	0.021443	7.95e-06	2.98e-05	0.00470167	0.00682552	2.98171e-05	3.89293e-05
2.3	3	8	0.000737894	0.0227687	6.74e-06	3.16e-05	0.00496842	0.0072475	3.16189e-05	3.94853e-05
2.5	3	8	0.000688365	0.023464	6.07e-06	3.25e-05	0.00511364	0.00746883	3.25025e-05	3.99037e-05
2.7	3	8	0.000645104	0.0240584	5.41e-06	3.31e-05	0.00526001	0.00765803	3.3083e-05	4.00865e-05
1.5	3	9	0.000921646	0.0201244	8.98e-06	2.77e-05	0.00447541	0.0064058	2.77065e-05	3.80083e-05
1.7	3	9	0.000855149	0.0210231	8.41e-06	2.93e-05	0.00460162	0.00669186	2.93419e-05	3.86716e-05
1.9	3	9	0.000795939	0.0217991	7.81e-06	3.06e-05	0.00473293	0.00693887	3.05921e-05	3.91427e-05
2.1	3	9	0.000740952	0.0225136	7.18e-06	3.16e-05	0.00487016	0.00716631	3.16136e-05	3.95315e-05
2.3	3	9	0.000691157	0.0231532	6.54e-06	3.24e-05	0.00501142	0.00736988	3.23799e-05	3.97775e-05
1.5	3	10	0.000884723	0.0204901	8.88e-06	2.86e-05	0.00449757	0.00652221	2.85708e-05	3.82809e-05
1.7	3	10	0.000815547	0.0213863	8.28e-06	3.02e-05	0.00462855	0.00680746	3.01723e-05	3.89655e-05
1.9	3	10	0.000757306	0.0221009	7.68e-06	3.12e-05	0.00476229	0.00703494	3.12315e-05	3.92916e-05
2.3	3	10	0.00064689	0.0234784	6.35e-06	3.3e-05	0.00505214	0.00747341	3.29926e-05	3.99808e-05
2.5	3	10	0.000599935	0.0240543	5.67e-06	3.35e-05	0.00520206	0.00765673	3.34957e-05	4.00806e-05
2.3	4	-2	0.00185017	0.0102922	1.14e-05	1.21e-05	0.00394512	0.0040608	8.26407e-06	4.20925e-05
1.7	4	-1	0.00189179	0.00933205	1.16e-05	1.19e-05	0.0038967	0.00393975	6.87903e-06	4.2778e-05
1.9	4	-1	0.00178645	0.011044	1.12e-05	1.23e-05	0.00398014	0.00414835	9.43064e-06	4.32197e-05
2.3	4	-1	0.00154352	0.0140329	1.01e-05	1.43e-05	0.00422724	0.00476611	1.43107e-05	4.15453e-05
1.5	4	0	0.00180037	0.0105806	1.14e-05	1.21e-05	0.00394818	0.00406844	8.72687e-06	4.15599e-05
1.7	4	0	0.00165731	0.0125241	1.09e-05	1.26e-05	0.00405615	0.00433837	1.18962e-05	4.1721e-05
2.3	4	0	0.00134355	0.0168881	9.28e-06	1.98e-05	0.00441122	0.00537564	1.98155e-05	3.69065e-05
1.5	4	1	0.00158331	0.0132017	1.08e-05	1.31e-05	0.00407841	0.00439403	1.31444e-05	3.9902e-05
1.7	4	1	0.00145349	0.0147973	1.03e-05	1.6e-05	0.00419474	0.00471013	1.60407e-05	3.9079e-05
2.3	4	1	0.00129793	0.0192257	9.08e-06	2.54e-05	0.00445319	0.00611972	2.54223e-05	3.91247e-05
1.5	4	2	0.00143098	0.0149769	1.04e-05	1.65e-05	0.00416981	0.00476731	1.65346e-05	3.80648e-05
1.7	4	2	0.0013503	0.0161866	9.94e-06	1.89e-05	0.00426492	0.00515236	1.88644e-05	3.73575e-05
1.9	4	2	0.00121192	0.017174	9.25e-06	2.05e-05	0.00441678	0.00546665	2.04646e-05	3.66427e-05
2.3	4	2	0.00109463	0.018612	8.23e-06	2.28e-05	0.00464022	0.00592439	2.27894e-05	3.58608e-05
1.5	4	3	0.00135515	0.0161072	1.02e-05	1.89e-05	0.00421531	0.00512708	1.89097e-05	3.66568e-05
1.7	4	3	0.00119433	0.0171802	9.46e-06	2.07e-05	0.00437097	0.00546862	2.07077e-05	3.63511e-05
2.3	4	3	0.00101982	0.0196857	7.92e-06	2.51e-05	0.00470905	0.00626616	2.50871e-05	3.68412e-05
2.5	4	3	0.000975932	0.020464	7.38e-06	2.64e-05	0.00482607	0.0065139	2.63851e-05	3.74266e-05
2.9	4	3	0.000896173	0.0219152	6.26e-06	2.86e-05	0.00507188	0.00697583	2.86188e-05	3.85498e-05
1.5	4	4	0.00119841	0.0170176	9.74e-06	2.06e-05	0.00430935	0.00541687	2.0625e-05	3.63656e-05
1.7	4	4	0.00111874	0.0178324	9.22e-06	2.2e-05	0.00442238	0.00567624	2.20341e-05	3.55969e-05
2.1	4	4	0.0010006	0.0197731	8.18e-06	2.56e-05	0.00465206	0.00629396	2.56499e-05	3.71311e-05
2.3	4	4	0.000952836	0.0205759	7.64e-06	2.7e-05	0.00477067	0.00654951	2.70176e-05	3.77379e-05
2.5	4	4	0.000907092	0.0213591	7.07e-06	2.83e-05	0.00489491	0.00679883	2.8294e-05	3.83888e-05
2.9	4	4	0.000829565	0.0226863	5.91e-06	3.01e-05	0.00514914	0.00722126	3.01447e-05	3.92091e-05
1.5	4	5	0.00140499	0.0171896	1.03e-05	2.17e-05	0.00418541	0.00547161	2.16967e-05	3.48284e-05
1.7	4	5	0.00105514	0.0186986	9.03e-06	2.4e-05	0.00446562	0.00595196	2.39759e-05	3.6403e-05
1.9	4	5	0.000996746	0.0196198	8.5e-06	2.57e-05	0.00458031	0.00624518	2.56846e-05	3.70689e-05
2.3	4	5	0.000891403	0.0213262	7.38e-06	2.86e-05	0.00482719	0.00678835	2.86479e-05	3.85186e-05
2.5	4	5	0.0008505	0.0219686	6.81e-06	2.95e-05	0.0049515	0.00699281	2.95487e-05	3.882e-05
1.5	4	6	0.00107035	0.0183267	9.39e-06	2.35e-05	0.00438619	0.00583357	2.3477e-05	3.61615e-05
1.7	4	6	0.00100059	0.0193922	8.86e-06	2.56e-05	0.00450272	0.00617274	2.55595e-05	3.7045e-05
1.9	4	6	0.000941489	0.0202974	8.31e-06	2.72e-05	0.00462231	0.00646087	2.72181e-05	3.77595e-05
2.1	4	6	0.000887583	0.0211278	7.75e-06	2.86e-05	0.00474699	0.00672518	2.86432e-05	3.84169e-05
2.3	4	6	0.000838847	0.0218693	7.16e-06	2.98e-05	0.00487554	0.00696122	2.97933e-05	3.89171e-05
2.5	4	6	0.000795124	0.022536	6.56e-06	3.07e-05	0.00500688	0.00717344	3.07081e-05	3.92797e-05
1.5	4	7	0.00101955	0.0189634	9.25e-06	2.5e-05	0.00441667	0.00603623	2.49519e-05	3.67418e-05
1.7	4	7	0.000949618	0.0200078	8.7e-06	2.7e-05	0.00453738	0.00636867	2.6984e-05	3.76773e-05
1.9	4	7	0.000888566	0.0209167	8.13e-06	2.86e-05	0.00466253	0.00665798	2.86323e-05	3.84514e-05
2.1	4	7	0.000835704	0.0216794	7.55e-06	2.99e-05	0.00479057	0.00690076	2.98555e-05	3.89432e-05
2.3	4	7	0.000787922	0.0223614	6.95e-06	3.08e-05	0.00492239	0.00711784	3.08179e-05	3.92973e-05
1.3	4	8	0.00105002	0.0184211	9.66e-06	2.41e-05	0.00432767	0.00586363	2.40595e-05	3.64311e-05
1.5	4	8	0.00097281	0.0195218	9.12e-06	2.63e-05	0.00444471	0.00621398	2.6265e-05	3.7291e-05
1.7	4	8	0.00090141	0.0205572	8.55e-06	2.83e-05	0.00457016	0.00654355	2.82653e-05	3.82665e-05
1.9	4	8	0.000845287	0.0213313	7.98e-06	2.96e-05	0.00469542	0.00678997	2.95504e-05	3.87193e-05
2.3	4	8	0.000742917	0.0227271	6.76e-06	3.15e-05	0.0049638	0.00723428	3.15366e-05	3.94573e-05
2.7	4	8	0.000650708	0.0240063	5.44e-06	3.3e-05	0.00525396	0.00764146	3.29837e-05	4.00295e-05
1.5	4	9	0.000925654	0.0200814	8.99e-06	2.76e-05	0.00447301	0.00639212	2.76042e-05	3.79678e-05
1.7	4	9	0.000859407	0.0209803	8.42e-06	2.92e-05	0.00459872	0.00667825	2.92427e-05	3.86287e-05
1.9	4	9	0.000800483	0.0217561	7.83e-06	3.05e-05	0.00472947	0.00692518	3.0496e-05	3.90982e-05
2.1	4	9	0.000745785	0.0224699	7.2e-06	3.15e-05	0.0048661	0.00715239	3.15202e-05	3.94854e-05
2.3	4	9	0.00069628	0.0231082	6.56e-06	3.23e-05	0.0050067	0.00735556	3.22884e-05	3.97297e-05
2.5	4	9	0.000648288	0.0237384	5.89e-06	3.3e-05	0.00515371	0.00755617	3.29722e-05	3.99765e-05
1.5	4	10	0.000885091	0.0205141	8.88e-06	2.86e-05	0.00449734	0.00652983	2.86391e-05	3.84086e-05
1.7	4	10	0.000819896	0.0213414	8.3e-06	3.01e-05	0.00462559	0.00679318	3.00667e-05	3.89062e-05
1.9	4	10	0.000758072	0.0221268	7.68e-06	3.13e-05	0.0047617	0.00704317	3.13089e-05	3.94171e-05
2.1	4	10	0.000704416	0.0227822	7.04e-06	3.21e-05	0.00490085	0.00725181	3.21462e-05	3.96592e-05
2.3	4	10	0.000652103	0.0234303	6.38e-06	3.29e-05	0.00504734	0.0074581	3.2893e-05	3.99167e-05
2.5	4	10	0.000605435	0.0240044	5.7e-06	3.34e-05	0.00519657	0.00764083	3.33972e-05	4.00148e-05

## Sheet: (31,30.3)
																					whole potentials of the equilibrium droplet		the unit length energy barrier
0	0	0	0.001934	0	1.18e-05	1.18e-05	0.003868	0.003868	0	4.70027e-05		(0,0,0)	1.632	-129.3	2.013	3.212	-749.2	-169.2	170.4		2.746e-06		2.9e-06
0.2	0	0	0.00185798	0.00941205	1.17e-05	1.18e-05	0.00387408	0.0038832	7.03844e-06	4.50688e-05		(1,0,0)	-0.01921	623.4	22.07	52.01	2766	697.8	-387.5
0.4	0	0	0.00179829	0.0114043	1.17e-05	1.18e-05	0.00388971	0.00392228	1.02919e-05	4.38934e-05		(0,1,0)	-1.178	-3.015	-0.5187	-0.5796	-16.98	-8.392	1.146
0.8	0	0	0.00167891	0.0128599	1.14e-05	1.29e-05	0.00394963	0.00409344	1.28869e-05	4.1897e-05		(0,0,1)	-0.9835	1.829	-0.2508	-0.0109	7.825	6.158	-0.5239
1.2	0	0	0.00155953	0.0144691	1.09e-05	1.59e-05	0.00404775	0.00460567	1.5912e-05	3.98495e-05		(2,0,0)	3.263	-821.5	-40.99	-102.3	-3376	-878.1	412.5
1.6	0	0	0.00144014	0.0156664	1.03e-05	1.8e-05	0.00418407	0.00498677	1.8028e-05	3.78811e-05		(1,1,0)	1.823	7.745	1.326	1.994	27.8	18.9	-3.732
2	0	0	0.00120484	0.0171712	9.09e-06	2.03e-05	0.00445133	0.00546576	2.02884e-05	3.69072e-05		(1,0,1)	1.744	-4.556	0.3093	-0.358	-23.9	-12.92	2.372
2.1	0	0	0.00117464	0.0175592	8.84e-06	2.09e-05	0.00450586	0.00558927	2.09402e-05	3.67215e-05		(0,2,0)	0.01609	-0.05326	-0.00499	-0.01901	0.04959	-0.05458	0.01547
2.2	0	0	0.00114658	0.0179133	8.59e-06	2.15e-05	0.00456093	0.00570198	2.15095e-05	3.6513e-05		(0,1,1)	0.0232	0.09046	0.01195	0.01619	0.3895	0.1597	-0.00166
2.3	0	0	0.00112038	0.0182387	8.34e-06	2.2e-05	0.00461653	0.00580554	2.20066e-05	3.62873e-05		(0,0,2)	0.01376	-0.0234	0.002164	-0.002825	-0.04567	-0.0846	-0.0204
2.4	0	0	0.00109578	0.0185397	8.08e-06	2.24e-05	0.00467269	0.00590138	2.24411e-05	3.60503e-05		(3,0,0)	-0.4421	450.7	29.01	71.62	1740	464.9	-193.6
2.5	0	0	0.00107474	0.0188273	7.84e-06	2.28e-05	0.00472726	0.00601615	2.28496e-05	3.58995e-05		(2,1,0)	-0.9881	-7.02	-1.187	-2.024	-16.43	-14.38	3.427
2.6	0	0	0.00105476	0.0190987	7.58e-06	2.32e-05	0.00478241	0.00615403	2.32144e-05	3.57415e-05		(2,0,1)	-1.005	3.805	-0.08194	0.4722	20.4	8.827	-2.531
2.7	0	0	0.00103574	0.0194596	7.33e-06	2.38e-05	0.00483812	0.0062933	2.37926e-05	3.59609e-05		(1,2,0)	-0.01496	0.1179	0.01547	0.03924	0.01949	0.115	-0.01816
2.8	0	0	0.0010195	0.0197692	7.08e-06	2.43e-05	0.00489224	0.0064286	2.42532e-05	3.60794e-05		(1,1,1)	-0.02652	-0.1428	-0.02045	-0.03184	-0.4332	-0.2359	0.02012
2.9	0	0	0.00100215	0.0201087	6.82e-06	2.48e-05	0.00494895	0.00657037	2.47717e-05	3.62806e-05		(1,0,2)	-0.01691	0.02725	-0.002639	0.00401	0.08984	0.1135	0.02253
3	0	0	0.000987325	0.020406	6.57e-06	2.52e-05	0.00500401	0.00670803	2.51938e-05	3.64041e-05		(0,3,0)	-0.0001332	-0.001018	-0.000184	-0.0002996	-0.0003853	-0.0008153	-0.0001931
3.2	0	0	0.000957962	0.021001	6.06e-06	2.6e-05	0.00511733	0.00699132	2.60156e-05	3.66717e-05		(0,2,1)	-9.7e-05	0.001024	0.0001306	0.0003052	-0.001256	0.0008239	-8.737e-05
3.4	0	0	0.000929962	0.0215896	5.53e-06	2.68e-05	0.00523349	0.00728173	2.6797e-05	3.70031e-05		(0,1,2)	-0.0001592	-0.0008035	-9.116e-05	-0.0001398	-0.002628	-0.001068	-0.0001221
3.6	0	0	0.000903972	0.0221567	4.99e-06	2.75e-05	0.00535124	0.0075761	2.75069e-05	3.73422e-05		(0,0,3)	-5.947e-05	0.000218	1.366e-07	3.215e-05	0.0003295	0.0004859	0.0001565
3.8	0	0	0.00087879	0.0227175	4.44e-06	2.82e-05	0.00547192	0.0078778	2.81746e-05	3.76949e-05		(4,0,0)	0.006966	-89.54	-6.974	-16.84	-326.2	-89.78	34.52
4	0	0	0.000856166	0.0232413	3.89e-06	2.87e-05	0.00559253	0.00817934	2.87418e-05	3.8007e-05		(3,1,0)	0.2007	2.244	0.3711	0.6642	3.617	3.704	-0.9612
4.2	0	0	0.000834794	0.023755	3.34e-06	2.93e-05	0.00571467	0.00848467	2.92659e-05	3.83245e-05		(3,0,1)	0.1803	-1.082	-0.01808	-0.1671	-5.326	-1.948	0.7769
2.3	0	-5	0.00190606	0.00924145	1.16e-05	1.19e-05	0.0038937	0.00393226	6.75133e-06	4.28207e-05		(2,2,0)	0.001833	-0.06649	-0.009588	-0.02	-0.03699	-0.05692	0.005737
1.9	0	-4	0.0018855	0.00922112	1.16e-05	1.19e-05	0.00390486	0.00396015	6.70238e-06	3.52824e-05		(2,1,1)	0.009087	0.05678	0.009081	0.01442	0.1258	0.08829	-0.01203
2.3	0	-4	0.00175451	0.0115424	1.1e-05	1.25e-05	0.00403313	0.00428083	1.01633e-05	4.05691e-05		(2,0,2)	0.004984	-0.006525	0.0008202	-0.001234	-0.03592	-0.0366	-0.005984
1.7	0	-3	0.00188331	0.00944761	1.16e-05	1.19e-05	0.00390247	0.00395418	7.03999e-06	4.27044e-05		(1,3,0)	0.0001445	0.001097	0.0001779	0.0002688	0.0006031	0.0006555	4.961e-05
1.9	0	-3	0.0017159	0.01357	1.1e-05	1.4e-05	0.00403376	0.00431946	1.40454e-05	4.16619e-05		(1,2,1)	-5.096e-05	-0.001005	-0.0001571	-0.0002704	0.000192	-0.0008016	7.052e-05
2.3	0	-3	0.00153629	0.0141091	1.01e-05	1.44e-05	0.00423389	0.00478273	1.44428e-05	4.1477e-05		(1,1,2)	9.953e-05	0.00067	8.015e-05	0.0001293	0.001531	0.0007867	1.509e-05
1.5	0	-2	0.00184767	0.00991435	1.15e-05	1.2e-05	0.0039198	0.00399749	7.71831e-06	4.17944e-05		(1,0,3)	3.731e-05	-0.0001366	3.581e-07	-1.989e-05	-0.0002463	-0.0003309	-9.571e-05
1.7	0	-2	0.00170897	0.0118947	1.11e-05	1.24e-05	0.00402102	0.00425056	1.08263e-05	4.19075e-05		(0,4,0)	-1.038e-06	-3.926e-06	-5.792e-07	-3.674e-07	-8.927e-06	5.13e-07	2.406e-06
2.3	0	-2	0.0013733	0.0161222	9.4e-06	1.82e-05	0.00438384	0.00515761	1.8179e-05	3.61248e-05		(0,3,1)	2.169e-06	5.742e-06	1.243e-06	1.186e-06	7.638e-06	3.172e-06	-6.655e-07
1.5	0	-1	0.00167592	0.012198	1.1e-05	1.25e-05	0.00402285	0.00425512	1.13802e-05	4.1403e-05		(0,2,2)	5.598e-08	-3.605e-06	-4.915e-07	-9.94e-07	4.433e-06	-2.246e-06	4.945e-07
1.7	0	-1	0.00151977	0.0139996	1.05e-05	1.45e-05	0.00414967	0.00457218	1.45196e-05	3.98861e-05		(0,1,3)	3.419e-07	1.762e-06	1.938e-07	3.392e-07	5.251e-06	2.285e-06	5.101e-07
2.3	0	-1	0.00130648	0.0182881	9.12e-06	2.3e-05	0.00444532	0.00582128	2.30468e-05	3.81669e-05		(0,0,4)	7.666e-08	-5.912e-07	-2.316e-08	-9.117e-08	-9.686e-07	-9.43e-07	-3.31e-07
2.5	0	-1	0.00118008	0.0178818	8.32e-06	2.11e-05	0.00462192	0.0057528	2.11271e-05	3.64425e-05
1.5	0	1	0.00140422	0.0153583	1.03e-05	1.73e-05	0.00418587	0.00488871	1.73182e-05	3.77483e-05
1.7	0	1	0.00133704	0.0164698	9.9e-06	1.95e-05	0.00427394	0.0052425	1.9487e-05	3.70832e-05
1.9	0	1	0.00118546	0.0174215	9.16e-06	2.1e-05	0.00443689	0.00554543	2.09568e-05	3.63908e-05
2.3	0	1	0.00107069	0.0189785	8.13e-06	2.36e-05	0.00466225	0.00604105	2.35735e-05	3.62562e-05
1.5	0	2	0.00135026	0.0162598	1.02e-05	1.93e-05	0.00421824	0.00517567	1.92558e-05	3.65778e-05
1.7	0	2	0.00118111	0.0173161	9.42e-06	2.1e-05	0.00437997	0.00551188	2.09908e-05	3.62848e-05
2.3	0	2	0.00100793	0.019856	7.87e-06	2.55e-05	0.00471999	0.00632035	2.54579e-05	3.70274e-05
2.7	0	2	0.000922417	0.0213707	6.77e-06	2.79e-05	0.00496051	0.00680251	2.79053e-05	3.81883e-05
2.9	0	2	0.000883247	0.0220802	6.2e-06	2.9e-05	0.00508687	0.00702835	2.89541e-05	3.87291e-05
1.5	0	3	0.00118954	0.0170726	9.72e-06	2.07e-05	0.00431467	0.00543438	2.07316e-05	3.62359e-05
1.7	0	3	0.0011145	0.0178925	9.21e-06	2.22e-05	0.00442526	0.00569535	2.21673e-05	3.56431e-05
2.1	0	3	0.000996499	0.0198288	8.16e-06	2.58e-05	0.0046555	0.00631172	2.5774e-05	3.71859e-05
2.3	0	3	0.000948625	0.0206315	7.62e-06	2.71e-05	0.00477454	0.00656723	2.71396e-05	3.77966e-05
2.5	0	3	0.000902696	0.0214083	7.05e-06	2.84e-05	0.0048993	0.00681446	2.83958e-05	3.84243e-05
2.9	0	3	0.000824752	0.0227375	5.89e-06	3.02e-05	0.00515473	0.00723756	3.02435e-05	3.92473e-05
1.5	0	4	0.00140458	0.0171967	1.03e-05	2.17e-05	0.00418565	0.00547387	2.17133e-05	3.48579e-05
1.7	0	4	0.00105498	0.0187091	9.03e-06	2.4e-05	0.00446573	0.0059553	2.40022e-05	3.64452e-05
1.9	0	4	0.000996602	0.0196308	8.5e-06	2.57e-05	0.00458042	0.00624869	2.57128e-05	3.71116e-05
2.3	0	4	0.000891285	0.0213311	7.38e-06	2.87e-05	0.0048273	0.00678991	2.86604e-05	3.85369e-05
2.5	0	4	0.000850395	0.0219809	6.81e-06	2.96e-05	0.00495161	0.00699674	2.95812e-05	3.88643e-05
1.5	0	5	0.00107413	0.0182852	9.4e-06	2.34e-05	0.00438392	0.00582035	2.33836e-05	3.61521e-05
1.7	0	5	0.00100433	0.0193535	8.87e-06	2.55e-05	0.00450018	0.0061604	2.54729e-05	3.70325e-05
1.9	0	5	0.000945338	0.0202597	8.33e-06	2.71e-05	0.00461938	0.00644887	2.71358e-05	3.77446e-05
2.3	0	5	0.000843108	0.0218244	7.18e-06	2.97e-05	0.00487162	0.00694691	2.96976e-05	3.88749e-05
2.5	0	5	0.000799608	0.022483	6.58e-06	3.06e-05	0.00500239	0.00715656	3.05947e-05	3.92116e-05
1.5	0	6	0.00102337	0.0189404	9.26e-06	2.49e-05	0.00441438	0.00602893	2.49054e-05	3.68267e-05
1.7	0	6	0.000957306	0.019917	8.72e-06	2.68e-05	0.00453215	0.00633979	2.67731e-05	3.75733e-05
1.9	0	6	0.000896583	0.0208192	8.16e-06	2.84e-05	0.00465644	0.00662697	2.84067e-05	3.83187e-05
2.3	0	6	0.000792902	0.0223357	6.97e-06	3.08e-05	0.00491781	0.00710969	3.07794e-05	3.93463e-05
2.5	0	6	0.000750682	0.0229363	6.36e-06	3.15e-05	0.00505132	0.00730085	3.14924e-05	3.95347e-05
1.3	0	7	0.00105771	0.0183389	9.67e-06	2.39e-05	0.00432367	0.00583744	2.38684e-05	3.64095e-05
1.5	0	7	0.000980512	0.0194444	9.14e-06	2.61e-05	0.00444009	0.00618935	2.60862e-05	3.72605e-05
1.7	0	7	0.000909473	0.0204816	8.58e-06	2.81e-05	0.00456468	0.00651951	2.80945e-05	3.82307e-05
1.9	0	7	0.000850085	0.0213204	8e-06	2.95e-05	0.00469177	0.0067865	2.95454e-05	3.88395e-05
2.1	0	7	0.000798746	0.0220218	7.41e-06	3.06e-05	0.00482161	0.00700975	3.05863e-05	3.91844e-05
2.3	0	7	0.000748665	0.0227096	6.78e-06	3.15e-05	0.00495851	0.0072287	3.15257e-05	3.95487e-05
2.5	0	7	0.000703906	0.0233268	6.15e-06	3.22e-05	0.00509809	0.00742515	3.22349e-05	3.97761e-05
1.5	0	8	0.00093732	0.0199473	9.03e-06	2.73e-05	0.00446601	0.00634942	2.72824e-05	3.78027e-05
1.7	0	8	0.000867951	0.02091	8.45e-06	2.91e-05	0.00459291	0.00665587	2.90869e-05	3.86175e-05
1.9	0	8	0.000809687	0.021686	7.86e-06	3.03e-05	0.00472248	0.00690286	3.03491e-05	3.9084e-05
2.1	0	8	0.000755658	0.0223988	7.24e-06	3.14e-05	0.00485781	0.00712977	3.13807e-05	3.94678e-05
2.3	0	8	0.000706817	0.0230279	6.61e-06	3.21e-05	0.00499701	0.00733	3.21346e-05	3.96839e-05
2.5	0	8	0.000659487	0.0236553	5.94e-06	3.28e-05	0.00514251	0.00752972	3.28232e-05	3.9927e-05
1.5	0	9	0.000897138	0.0203834	8.92e-06	2.83e-05	0.00449012	0.00648823	2.83242e-05	3.82542e-05
1.7	0	9	0.000828981	0.0212809	8.33e-06	2.99e-05	0.00461941	0.00677392	2.994e-05	3.8932e-05
1.9	0	9	0.000771796	0.0219878	7.73e-06	3.1e-05	0.00475128	0.00699892	3.09916e-05	3.92275e-05
2.1	0	9	0.000715055	0.0227132	7.08e-06	3.2e-05	0.00489191	0.00722984	3.2017e-05	3.96521e-05
2.3	0	9	0.000663518	0.0233589	6.42e-06	3.28e-05	0.00503684	0.00743538	3.277e-05	3.99065e-05
1.5	0	10	0.000859775	0.0207542	8.81e-06	2.92e-05	0.00451253	0.00660627	2.92073e-05	3.8603e-05
1.7	0	10	0.000792634	0.021588	8.21e-06	3.06e-05	0.00464413	0.00687167	3.06317e-05	3.91394e-05
1.9	0	10	0.000732674	0.0223053	7.59e-06	3.17e-05	0.00478101	0.00709999	3.16742e-05	3.94751e-05
2.1	0	10	0.000677103	0.0229654	6.94e-06	3.25e-05	0.00492379	0.00731012	3.2495e-05	3.9728e-05
2.3	0	10	0.000622869	0.0236283	6.25e-06	3.33e-05	0.00507424	0.00752111	3.32502e-05	4.00195e-05
2.5	0	10	0.000574302	0.0242192	5.55e-06	3.38e-05	0.0052277	0.0077092	3.37652e-05	4.01504e-05
2.7	0	10	0.000528419	0.0247772	4.83e-06	3.41e-05	0.00538603	0.00788684	3.41403e-05	4.01897e-05
2.3	1	-4	0.0019212	0.00855879	1.17e-05	1.18e-05	0.00387978	0.00389745	5.81157e-06	4.3288e-05
1.9	1	-3	0.00188477	0.009266	1.16e-05	1.19e-05	0.00390542	0.00396155	6.7668e-06	3.53079e-05
2.3	1	-3	0.00174581	0.0116242	1.1e-05	1.25e-05	0.00404113	0.00430083	1.02871e-05	4.03785e-05
1.7	1	-2	0.0018545	0.00994331	1.15e-05	1.2e-05	0.00392206	0.00400314	7.75896e-06	4.2665e-05
1.9	1	-2	0.0016601	0.0149815	1.08e-05	1.69e-05	0.00407617	0.00476877	1.69371e-05	4.38534e-05
2.3	1	-2	0.00148193	0.0143636	9.86e-06	1.48e-05	0.00428391	0.00490777	1.47854e-05	3.6234e-05
1.5	1	-1	0.00179124	0.0106951	1.14e-05	1.21e-05	0.00395365	0.00408214	8.90423e-06	4.15289e-05
1.7	1	-1	0.00164886	0.0126217	1.09e-05	1.26e-05	0.0040619	0.00435274	1.2065e-05	4.16856e-05
2.3	1	-1	0.0013401	0.0169982	9.26e-06	2.01e-05	0.00441439	0.00541068	2.00593e-05	3.70645e-05
1.5	1	0	0.001598	0.0130372	1.08e-05	1.28e-05	0.0040696	0.00437201	1.28473e-05	4.00814e-05
1.7	1	0	0.00146446	0.0146658	1.03e-05	1.58e-05	0.00418729	0.00466825	1.57859e-05	3.92552e-05
2.3	1	0	0.00129712	0.0191014	9.08e-06	2.51e-05	0.00445393	0.00608017	2.50903e-05	3.90495e-05
2.5	1	0	0.00114658	0.0182166	8.16e-06	2.18e-05	0.00465542	0.00583654	2.17536e-05	3.61013e-05
1.5	1	1	0.00145078	0.0147346	1.04e-05	1.61e-05	0.00415793	0.00469018	1.60513e-05	3.83843e-05
1.7	1	1	0.00136173	0.0160086	9.98e-06	1.85e-05	0.00425714	0.0050957	1.84871e-05	3.76493e-05
2.3	1	1	0.00111046	0.0183798	8.3e-06	2.23e-05	0.00462565	0.00585048	2.23006e-05	3.5641e-05
2.5	1	1	0.00106225	0.019257	7.78e-06	2.38e-05	0.00473975	0.00612969	2.38353e-05	3.63332e-05
1.5	1	2	0.00136998	0.0158877	1.02e-05	1.84e-05	0.00420641	0.00505721	1.84384e-05	3.71478e-05
1.7	1	2	0.00132472	0.0168317	9.86e-06	2.03e-05	0.00428231	0.00535771	2.03111e-05	3.63784e-05
1.9	1	2	0.00114333	0.0177676	9.01e-06	2.16e-05	0.00446891	0.00565559	2.16306e-05	3.58716e-05
2.3	1	2	0.00103535	0.0194866	7.98e-06	2.47e-05	0.00469475	0.00620277	2.46642e-05	3.67273e-05
2.5	1	2	0.000991657	0.0202695	7.46e-06	2.6e-05	0.00481034	0.00645197	2.59797e-05	3.73015e-05
2.9	1	2	0.000912989	0.0217121	6.35e-06	2.82e-05	0.00505237	0.00691117	2.82137e-05	3.8385e-05
1.5	1	3	0.00122506	0.0168144	9.81e-06	2.02e-05	0.00429337	0.00535219	2.02144e-05	3.67356e-05
1.7	1	3	0.00113905	0.0176532	9.29e-06	2.17e-05	0.00440856	0.00561919	2.16656e-05	3.57855e-05
1.9	1	3	0.00107481	0.0186031	8.78e-06	2.34e-05	0.00452098	0.00592156	2.34194e-05	3.61991e-05
2.1	1	3	0.00101996	0.0195245	8.25e-06	2.51e-05	0.0046358	0.00621485	2.51049e-05	3.69193e-05
2.3	1	3	0.00169026	0.0210007	1.07e-05	3.31e-05	0.00409224	0.00668474	3.31466e-05	3.96647e-05
2.9	1	3	0.000851825	0.0224169	6.03e-06	2.96e-05	0.00512332	0.00713552	2.96024e-05	3.89164e-05
1.5	1	4	0.00115107	0.017417	9.61e-06	2.15e-05	0.00433776	0.00554402	2.14553e-05	3.59021e-05
1.7	1	4	0.00107853	0.0183835	9.1e-06	2.33e-05	0.00444972	0.00585164	2.32632e-05	3.60822e-05
2.3	1	4	0.000912166	0.0210907	7.47e-06	2.81e-05	0.00480809	0.00671338	2.81422e-05	3.83117e-05
2.5	1	4	0.000868467	0.021805	6.9e-06	2.92e-05	0.00493353	0.00694076	2.92294e-05	3.87926e-05
2.7	1	4	0.000830716	0.0224197	6.32e-06	3e-05	0.00505955	0.00713641	3.00343e-05	3.90698e-05
2.9	1	4	0.00079121	0.0230787	5.71e-06	3.09e-05	0.00519364	0.00734617	3.0891e-05	3.94693e-05
1.5	1	5	0.00109004	0.0180914	9.44e-06	2.29e-05	0.00437437	0.00575868	2.29437e-05	3.60606e-05
1.7	1	5	0.00102372	0.0190999	8.93e-06	2.49e-05	0.00448699	0.00607967	2.48881e-05	3.67412e-05
1.9	1	5	0.000961362	0.0200747	8.38e-06	2.67e-05	0.0046072	0.00638997	2.6719e-05	3.75955e-05
2.1	1	5	0.000908425	0.0209048	7.83e-06	2.82e-05	0.00472948	0.0066542	2.81561e-05	3.82431e-05
2.3	1	5	0.000860828	0.0216443	7.25e-06	2.93e-05	0.00485532	0.0068896	2.93189e-05	3.87377e-05
2.7	1	5	0.000773954	0.0230012	6.04e-06	3.12e-05	0.00512085	0.00732151	3.11829e-05	3.95417e-05
1.5	1	6	0.00162174	0.0174456	1.09e-05	2.31e-05	0.00405536	0.00555312	2.30876e-05	3.39897e-05
1.7	1	6	0.000973041	0.019729	8.77e-06	2.63e-05	0.00452145	0.00627993	2.63369e-05	3.73766e-05
1.9	1	6	0.000912989	0.0206316	8.21e-06	2.8e-05	0.00464397	0.00656723	2.79787e-05	3.81122e-05
2.3	1	6	0.000811129	0.0221437	7.04e-06	3.04e-05	0.00490104	0.00704856	3.03682e-05	3.9131e-05
2.5	1	6	0.000765874	0.0228086	6.43e-06	3.12e-05	0.00503613	0.00726019	3.1249e-05	3.94743e-05
1.3	1	7	0.00107341	0.0181342	9.71e-06	2.34e-05	0.00431551	0.0057723	2.33852e-05	3.61699e-05
1.5	1	7	0.000992284	0.0193171	9.18e-06	2.58e-05	0.00443303	0.00614881	2.57894e-05	3.71886e-05
1.7	1	7	0.000925453	0.0202864	8.63e-06	2.76e-05	0.00455381	0.00645737	2.76327e-05	3.79633e-05
1.9	1	7	0.000866882	0.0211171	8.06e-06	2.91e-05	0.00467901	0.00672179	2.90713e-05	3.85403e-05
2.3	1	7	0.00076337	0.0225814	6.84e-06	3.13e-05	0.00494498	0.00718787	3.12664e-05	3.94522e-05
2.5	1	7	0.000719424	0.0231876	6.22e-06	3.2e-05	0.00508258	0.00738084	3.19619e-05	3.96491e-05
1.5	1	8	0.000949201	0.0198145	9.06e-06	2.7e-05	0.00445888	0.00630716	2.69666e-05	3.76707e-05
1.7	1	8	0.00088049	0.0207783	8.49e-06	2.88e-05	0.00458439	0.00661394	2.87796e-05	3.84778e-05
1.9	1	8	0.000823029	0.0215534	7.9e-06	3.01e-05	0.00471234	0.00686067	3.00502e-05	3.89396e-05
2.1	1	8	0.000769822	0.0222571	7.29e-06	3.11e-05	0.00484591	0.00708466	3.10695e-05	3.92936e-05
2.3	1	8	0.000717837	0.0229573	6.65e-06	3.2e-05	0.00498687	0.00730754	3.20111e-05	3.96921e-05
1.5	1	9	0.00090919	0.0202454	8.95e-06	2.8e-05	0.00448289	0.00644431	2.79905e-05	3.80727e-05
1.7	1	9	0.000841781	0.021143	8.37e-06	2.96e-05	0.00461071	0.00673004	2.96141e-05	3.87448e-05
1.9	1	9	0.000781558	0.0219197	7.76e-06	3.09e-05	0.00474386	0.00697727	3.08532e-05	3.92219e-05
2.3	1	9	0.000674745	0.0232798	6.47e-06	3.26e-05	0.00502651	0.00741018	3.26239e-05	3.98678e-05
1.5	1	10	0.000868309	0.0206803	8.84e-06	2.9e-05	0.00450741	0.00658275	2.90352e-05	3.85655e-05
1.7	1	10	0.000801875	0.0215145	8.24e-06	3.05e-05	0.00463784	0.00684828	3.04685e-05	3.90976e-05
1.9	1	10	0.000742636	0.0222309	7.62e-06	3.15e-05	0.00477344	0.00707631	3.15184e-05	3.94296e-05
2.1	1	10	0.000687787	0.0228889	6.98e-06	3.23e-05	0.00491482	0.00728577	3.23449e-05	3.96783e-05
2.3	1	10	0.000634277	0.0235412	6.3e-06	3.31e-05	0.00506374	0.00749341	3.30833e-05	3.9941e-05
2.5	1	10	0.000586425	0.0241206	5.61e-06	3.36e-05	0.00521558	0.00767784	3.35805e-05	4.00439e-05
2.7	1	10	0.000536938	0.024762	4.88e-06	3.42e-05	0.00537683	0.00788199	3.41662e-05	4.02984e-05
2.9	1	10	0.000494533	0.025298	4.14e-06	3.45e-05	0.00553778	0.0080526	3.44513e-05	4.02918e-05
2.3	2	-3	0.00190749	0.00926415	1.16e-05	1.19e-05	0.00389239	0.00392896	6.78684e-06	4.43827e-05
1.9	2	-2	0.00181609	0.0110728	1.13e-05	1.22e-05	0.00395761	0.00409202	9.53466e-06	3.78716e-05
2.3	2	-2	0.00163232	0.0127691	1.05e-05	1.3e-05	0.00414554	0.00456186	1.20919e-05	3.85159e-05
1.5	2	-1	0.00188566	0.00930261	1.16e-05	1.19e-05	0.00389701	0.00394052	6.83517e-06	4.19743e-05
1.7	2	-1	0.00176103	0.0112641	1.12e-05	1.23e-05	0.00398562	0.00416204	9.79657e-06	4.23194e-05
2.3	2	-1	0.00139989	0.0155007	9.51e-06	1.69e-05	0.00435938	0.00509645	1.69045e-05	3.55557e-05
1.5	2	0	0.00169257	0.0120161	1.11e-05	1.24e-05	0.00401286	0.00423015	1.10714e-05	4.15656e-05
1.7	2	0	0.00153297	0.0138556	1.05e-05	1.43e-05	0.0041407	0.00454975	1.42545e-05	4.00556e-05
2.3	2	0	0.00130445	0.018299	9.11e-06	2.31e-05	0.00444719	0.00582476	2.3064e-05	3.83608e-05
1.5	2	1	0.00149648	0.0141425	1.06e-05	1.49e-05	0.00413051	0.00452428	1.48887e-05	3.88528e-05
1.7	2	1	0.001395	0.0155343	1.01e-05	1.75e-05	0.00423452	0.00494473	1.75052e-05	3.82441e-05
2.3	2	1	0.00114302	0.0180908	8.43e-06	2.18e-05	0.0045957	0.00575849	2.1758e-05	3.59975e-05
2.5	2	1	0.00109395	0.0187762	7.92e-06	2.28e-05	0.00470805	0.00597666	2.28279e-05	3.58817e-05
1.5	2	2	0.00139255	0.0155211	1.03e-05	1.77e-05	0.00419287	0.00494051	1.76564e-05	3.75499e-05
1.7	2	2	0.00125298	0.01671	9.64e-06	1.98e-05	0.0043311	0.00531894	1.97807e-05	3.71654e-05
1.9	2	2	0.00117265	0.0175241	9.11e-06	2.12e-05	0.00444663	0.00557808	2.11547e-05	3.62206e-05
2.3	2	2	0.00141226	0.0207532	9.56e-06	3.04e-05	0.004348	0.00660593	3.03858e-05	4.00611e-05
2.5	2	2	0.00101525	0.0199486	7.56e-06	2.53e-05	0.00478675	0.00634984	2.53011e-05	3.70231e-05
2.9	2	2	0.000937826	0.0213842	6.48e-06	2.75e-05	0.00502356	0.0068068	2.75456e-05	3.80563e-05
1.5	2	3	0.00134576	0.0164187	1.01e-05	1.96e-05	0.00422094	0.00522622	1.96207e-05	3.63727e-05
1.7	2	3	0.00116406	0.0174587	9.36e-06	2.13e-05	0.00439156	0.00555729	2.12782e-05	3.60933e-05
2.3	2	3	0.000992311	0.020076	7.8e-06	2.59e-05	0.00473435	0.00639038	2.59383e-05	3.72842e-05
2.5	2	3	0.000947915	0.0208516	7.26e-06	2.72e-05	0.00485409	0.00663727	2.72183e-05	3.78882e-05
2.7	2	3	0.000909764	0.0215219	6.71e-06	2.82e-05	0.00497417	0.00685063	2.82141e-05	3.83033e-05
2.9	2	3	0.00087002	0.0222337	6.13e-06	2.93e-05	0.00510222	0.00707722	2.92578e-05	3.88477e-05
1.5	2	4	0.00117218	0.0172506	9.67e-06	2.11e-05	0.00432509	0.00549103	2.11123e-05	3.61429e-05
1.7	2	4	0.00141094	0.0175357	1.01e-05	2.24e-05	0.00422368	0.00558178	2.23661e-05	3.50462e-05
2.1	2	4	0.000980756	0.0200247	8.1e-06	2.62e-05	0.00466873	0.00637405	2.62042e-05	3.73485e-05
2.3	2	4	0.000932408	0.0208264	7.55e-06	2.76e-05	0.00478946	0.00662923	2.75593e-05	3.79696e-05
2.9	2	4	0.000810146	0.0228707	5.81e-06	3.05e-05	0.00517167	0.00727997	3.04843e-05	3.92744e-05
1.5	2	5	0.00110604	0.0178772	9.49e-06	2.25e-05	0.00436478	0.0056905	2.24559e-05	3.58586e-05
1.7	2	5	0.00103549	0.0189678	8.97e-06	2.46e-05	0.00447899	0.00603764	2.45922e-05	3.67086e-05
1.9	2	5	0.000977071	0.0198754	8.44e-06	2.63e-05	0.00459527	0.00632655	2.62652e-05	3.73663e-05
2.1	2	5	0.000920965	0.0207782	7.87e-06	2.79e-05	0.00471895	0.00661392	2.78845e-05	3.81895e-05
2.3	2	5	0.000874065	0.0215169	7.31e-06	2.91e-05	0.00484314	0.00684904	2.90558e-05	3.86792e-05
2.5	2	5	0.000832255	0.0221626	6.73e-06	2.99e-05	0.00496975	0.00705457	2.99489e-05	3.89843e-05
2.7	2	5	0.000788689	0.0228613	6.11e-06	3.09e-05	0.00510494	0.00727698	3.09141e-05	3.94521e-05
1.5	2	6	0.00105448	0.0185351	9.35e-06	2.4e-05	0.00439571	0.00589991	2.39587e-05	3.63669e-05
1.7	2	6	0.000984833	0.0195929	8.81e-06	2.6e-05	0.00451343	0.00623663	2.60247e-05	3.72677e-05
1.9	2	6	0.000925254	0.0204968	8.26e-06	2.77e-05	0.00463465	0.00652433	2.76749e-05	3.7995e-05
2.1	2	6	0.000870562	0.0213217	7.68e-06	2.91e-05	0.00476129	0.0067869	2.90747e-05	3.86337e-05
2.3	2	6	0.00082094	0.0220731	7.08e-06	3.02e-05	0.00489202	0.00702607	3.0237e-05	3.91642e-05
2.5	2	6	0.000780252	0.0226608	6.49e-06	3.09e-05	0.00502175	0.00721315	3.09452e-05	3.93203e-05
1.5	2	7	0.00100392	0.0191733	9.21e-06	2.54e-05	0.00442605	0.00610307	2.54499e-05	3.70293e-05
1.7	2	7	0.00093742	0.0201447	8.66e-06	2.73e-05	0.00454567	0.00641226	2.73007e-05	3.77943e-05
1.9	2	7	0.000875699	0.0210466	8.09e-06	2.89e-05	0.00467231	0.00669934	2.89228e-05	3.85506e-05
2.3	2	7	0.000773463	0.0225021	6.89e-06	3.11e-05	0.00493569	0.00716264	3.11128e-05	3.94308e-05
2.5	2	7	0.00073013	0.0231064	6.26e-06	3.18e-05	0.00507187	0.00735498	3.18144e-05	3.96244e-05
1.3	2	8	0.00103813	0.018571	9.63e-06	2.44e-05	0.00433385	0.00591134	2.44158e-05	3.65863e-05
1.5	2	8	0.000957186	0.0197362	9.08e-06	2.68e-05	0.00445409	0.00628224	2.67847e-05	3.76446e-05
1.7	2	8	0.000892684	0.0206311	8.52e-06	2.84e-05	0.00457609	0.00656707	2.84289e-05	3.82606e-05
1.9	2	8	0.000832095	0.0214694	7.93e-06	2.99e-05	0.00470545	0.00683393	2.98643e-05	3.88779e-05
2.1	2	8	0.000779508	0.0221792	7.33e-06	3.09e-05	0.00483777	0.00705987	3.09102e-05	3.92543e-05
2.3	2	8	0.000728153	0.0228777	6.7e-06	3.19e-05	0.00497738	0.00728221	3.18578e-05	3.96502e-05
2.5	2	8	0.000682168	0.0234923	6.05e-06	3.25e-05	0.00511983	0.00747783	3.2536e-05	3.98595e-05
1.5	2	9	0.000917304	0.0201627	8.97e-06	2.78e-05	0.00447802	0.00641799	2.77947e-05	3.80054e-05
1.7	2	9	0.000850446	0.0210609	8.39e-06	2.94e-05	0.00460482	0.00670389	2.94253e-05	3.86728e-05
1.9	2	9	0.000790836	0.0218371	7.79e-06	3.07e-05	0.00473681	0.00695095	3.06711e-05	3.91468e-05
2.1	2	9	0.000735446	0.0225523	7.16e-06	3.17e-05	0.00487479	0.00717861	3.16887e-05	3.9538e-05
2.3	2	9	0.000685252	0.0231855	6.52e-06	3.24e-05	0.00501685	0.00738019	3.24308e-05	3.97603e-05
2.5	2	9	0.000636569	0.0238265	5.84e-06	3.31e-05	0.00516543	0.00758421	3.31313e-05	4.0037e-05
1.5	2	10	0.000876574	0.0205937	8.86e-06	2.88e-05	0.00450246	0.00655519	2.88267e-05	3.8464e-05
1.7	2	10	0.000810727	0.0214278	8.27e-06	3.03e-05	0.00463183	0.00682068	3.02662e-05	3.89922e-05
1.9	2	10	0.000752094	0.0221356	7.66e-06	3.13e-05	0.00476625	0.00704599	3.1301e-05	3.92948e-05
2.3	2	10	0.000640884	0.0235231	6.33e-06	3.31e-05	0.00505767	0.00748765	3.30775e-05	4.00145e-05
1.9	3	-2	0.00189546	0.00890986	1.16e-05	1.19e-05	0.00389729	0.00394123	6.26973e-06	3.49454e-05
2.3	3	-2	0.00177376	0.0113041	1.11e-05	1.24e-05	0.00401542	0.00423655	9.79192e-06	4.08706e-05
1.7	3	-1	0.00184436	0.0101113	1.15e-05	1.2e-05	0.00392896	0.00402039	8.00917e-06	4.2679e-05
1.9	3	-1	0.00164131	0.0154802	1.07e-05	1.8e-05	0.00409044	0.00492751	1.80186e-05	4.45871e-05
2.3	3	-1	0.00146411	0.0145291	9.78e-06	1.51e-05	0.00430029	0.00494874	1.50673e-05	3.58497e-05
1.5	3	0	0.00175478	0.0111836	1.13e-05	1.22e-05	0.00397553	0.00413683	9.68199e-06	4.13562e-05
1.7	3	0	0.00160393	0.0130944	1.07e-05	1.29e-05	0.00409245	0.00442911	1.28861e-05	4.09247e-05
2.3	3	0	0.00132895	0.0173612	9.21e-06	2.09e-05	0.00442464	0.00552625	2.08736e-05	3.72845e-05
1.5	3	1	0.00154782	0.0135932	1.07e-05	1.39e-05	0.00409971	0.00444726	1.38611e-05	3.95383e-05
1.7	3	1	0.0014272	0.0151134	1.02e-05	1.67e-05	0.00421263	0.00481075	1.66594e-05	3.87251e-05
2.3	3	1	0.00116801	0.0178463	8.54e-06	2.13e-05	0.00457271	0.00568066	2.12893e-05	3.62367e-05
2.5	3	1	0.00111807	0.0184316	8.03e-06	2.21e-05	0.00468393	0.00590782	2.21218e-05	3.56607e-05
1.5	3	2	0.00141251	0.0152107	1.03e-05	1.7e-05	0.00418089	0.00484172	1.70079e-05	3.78045e-05
1.7	3	2	0.00134337	0.0163584	9.92e-06	1.92e-05	0.00426963	0.00520704	1.92446e-05	3.72925e-05
1.9	3	2	0.00119843	0.0173259	9.2e-06	2.08e-05	0.00442703	0.00551502	2.07769e-05	3.65902e-05
2.3	3	2	0.00108251	0.0187928	8.18e-06	2.32e-05	0.00465137	0.00598194	2.31735e-05	3.60187e-05
1.5	3	3	0.00127238	0.0163723	9.94e-06	1.93e-05	0.00426497	0.00521148	1.92995e-05	3.71822e-05
1.7	3	3	0.00118116	0.0172959	9.42e-06	2.09e-05	0.00437993	0.00550545	2.0942e-05	3.62318e-05
2.3	3	3	0.00100799	0.019865	7.87e-06	2.55e-05	0.00471993	0.00632322	2.54813e-05	3.70811e-05
2.5	3	3	0.000963942	0.0206421	7.33e-06	2.68e-05	0.00483806	0.00657059	2.67725e-05	3.76743e-05
2.9	3	3	0.000887265	0.0220119	6.22e-06	2.88e-05	0.00508221	0.0070066	2.88052e-05	3.85975e-05
1.5	3	4	0.00118519	0.0171107	9.7e-06	2.08e-05	0.00431729	0.00544652	2.0811e-05	3.61941e-05
1.7	3	4	0.00111046	0.0179487	9.2e-06	2.23e-05	0.00442801	0.00571326	2.22922e-05	3.56963e-05
2.3	3	4	0.000944627	0.0206838	7.6e-06	2.73e-05	0.00477822	0.00658385	2.7254e-05	3.78581e-05
2.5	3	4	0.00089854	0.021461	7.03e-06	2.85e-05	0.00490346	0.00683123	2.85087e-05	3.84869e-05
2.9	3	4	0.000824153	0.0227136	5.88e-06	3.02e-05	0.00515542	0.00722997	3.01754e-05	3.9128e-05
1.5	3	5	0.00141675	0.0172342	1.03e-05	2.18e-05	0.00417835	0.00548582	2.18478e-05	3.47713e-05
1.7	3	5	0.00104718	0.0188135	9e-06	2.42e-05	0.00447104	0.00598853	2.42399e-05	3.65518e-05
1.9	3	5	0.000988803	0.0197321	8.48e-06	2.59e-05	0.00458635	0.00628093	2.59424e-05	3.7225e-05
2.1	3	5	0.00093308	0.0206284	7.92e-06	2.75e-05	0.00470877	0.00656622	2.7549e-05	3.80149e-05
2.3	3	5	0.000886714	0.0213585	7.36e-06	2.87e-05	0.0048315	0.00679861	2.87061e-05	3.84744e-05
1.5	3	6	0.00106236	0.0184452	9.37e-06	2.38e-05	0.00439098	0.00587129	2.3754e-05	3.63429e-05
1.7	3	6	0.000992713	0.0195079	8.83e-06	2.58e-05	0.00450808	0.00620957	2.58324e-05	3.72341e-05
1.9	3	6	0.000933447	0.0204132	8.29e-06	2.75e-05	0.00462842	0.00649771	2.74898e-05	3.79545e-05
2.3	3	6	0.000833966	0.021914	7.14e-06	2.99e-05	0.00488003	0.00697546	2.98846e-05	3.89333e-05
2.5	3	6	0.000789942	0.0225744	6.54e-06	3.08e-05	0.00501206	0.00718565	3.07768e-05	3.92719e-05
1.5	3	7	0.00101171	0.0190822	9.23e-06	2.52e-05	0.00442137	0.00607405	2.52369e-05	3.69565e-05
1.7	3	7	0.000945417	0.0200556	8.69e-06	2.71e-05	0.00454024	0.00638388	2.70946e-05	3.77142e-05
1.9	3	7	0.000884122	0.0209575	8.11e-06	2.87e-05	0.00466591	0.00667099	2.87215e-05	3.84662e-05
2.1	3	7	0.000830973	0.0217278	7.53e-06	3e-05	0.00479454	0.00691618	2.99616e-05	3.89858e-05
2.3	3	7	0.000782895	0.0224106	6.92e-06	3.09e-05	0.00492702	0.00713352	3.09213e-05	3.93415e-05
1.3	3	8	0.00104593	0.0184738	9.65e-06	2.42e-05	0.0043298	0.00588039	2.41847e-05	3.64825e-05
1.5	3	8	0.000964999	0.0196422	9.1e-06	2.66e-05	0.0044494	0.00625231	2.656e-05	3.75325e-05
1.7	3	8	0.000897116	0.020608	8.54e-06	2.84e-05	0.00457308	0.00655973	2.83856e-05	3.83283e-05
1.9	3	8	0.000836938	0.0214469	7.95e-06	2.98e-05	0.00470177	0.00682676	2.98273e-05	3.89425e-05
2.3	3	8	0.000737783	0.022773	6.74e-06	3.16e-05	0.00496852	0.00724886	3.163e-05	3.94992e-05
2.5	3	8	0.000688261	0.0234685	6.07e-06	3.25e-05	0.00511374	0.00747025	3.25141e-05	3.99179e-05
2.7	3	8	0.000645007	0.024063	5.41e-06	3.31e-05	0.00526011	0.00765951	3.3095e-05	4.01011e-05
1.5	3	9	0.000921507	0.0201347	8.98e-06	2.77e-05	0.0044755	0.00640906	2.77342e-05	3.80464e-05
1.7	3	9	0.00085502	0.0210268	8.41e-06	2.94e-05	0.00460171	0.00669303	2.93516e-05	3.86845e-05
1.9	3	9	0.000795818	0.0218031	7.81e-06	3.06e-05	0.00473302	0.00694013	3.06026e-05	3.91562e-05
2.1	3	9	0.00074084	0.0225179	7.18e-06	3.16e-05	0.00487025	0.00716766	3.16248e-05	3.95455e-05
2.3	3	9	0.000691052	0.0231575	6.54e-06	3.24e-05	0.00501151	0.00737127	3.23914e-05	3.97917e-05
1.5	3	10	0.000884589	0.0204937	8.88e-06	2.86e-05	0.00449765	0.00652335	2.85802e-05	3.82936e-05
1.7	3	10	0.000815424	0.0213902	8.28e-06	3.02e-05	0.00462863	0.0068087	3.01827e-05	3.89788e-05
1.9	3	10	0.000757191	0.022105	7.68e-06	3.12e-05	0.00476238	0.00703624	3.12424e-05	3.93053e-05
2.3	3	10	0.000646792	0.0234829	6.35e-06	3.3e-05	0.00505223	0.00747483	3.30045e-05	3.99953e-05
2.5	3	10	0.000599844	0.024059	5.67e-06	3.35e-05	0.00520216	0.00765821	3.35079e-05	4.00951e-05
2.3	4	-2	0.00184989	0.0102977	1.14e-05	1.21e-05	0.00394538	0.00406145	8.27237e-06	4.21348e-05
1.7	4	-1	0.0018915	0.00933697	1.16e-05	1.19e-05	0.0038969	0.00394024	6.88594e-06	4.2821e-05
1.9	4	-1	0.00178618	0.0110498	1.12e-05	1.23e-05	0.00398034	0.00414886	9.44011e-06	4.32631e-05
2.3	4	-1	0.00154328	0.0140403	1.01e-05	1.43e-05	0.00422746	0.00476665	1.4325e-05	4.1587e-05
1.5	4	0	0.0018001	0.0105862	1.14e-05	1.21e-05	0.00394834	0.00406885	8.73559e-06	4.16014e-05
1.7	4	0	0.00165706	0.0125306	1.09e-05	1.26e-05	0.00405632	0.0043388	1.19081e-05	4.17628e-05
2.3	4	0	0.00134334	0.0169029	9.27e-06	1.98e-05	0.0044114	0.00538037	1.98495e-05	3.69697e-05
1.5	4	1	0.00158307	0.0132086	1.08e-05	1.32e-05	0.00407856	0.00439439	1.31576e-05	3.99421e-05
1.7	4	1	0.00145327	0.014805	1.03e-05	1.61e-05	0.00419489	0.00471258	1.60568e-05	3.91182e-05
2.3	4	1	0.00129773	0.0192357	9.08e-06	2.54e-05	0.00445337	0.0061229	2.54477e-05	3.91638e-05
1.5	4	2	0.00143076	0.0149847	1.04e-05	1.66e-05	0.00416994	0.00476978	1.65512e-05	3.8103e-05
1.7	4	2	0.00135009	0.016195	9.94e-06	1.89e-05	0.00426506	0.00515503	1.88833e-05	3.73948e-05
1.9	4	2	0.00121173	0.0171829	9.25e-06	2.05e-05	0.00441692	0.00546948	2.04851e-05	3.66795e-05
2.3	4	2	0.00109447	0.0186217	8.23e-06	2.28e-05	0.00464037	0.00592747	2.28123e-05	3.58967e-05
1.5	4	3	0.00135495	0.0161155	1.02e-05	1.89e-05	0.00421543	0.00512973	1.89287e-05	3.66937e-05
1.7	4	3	0.00119415	0.0171891	9.46e-06	2.07e-05	0.0043711	0.00547145	2.07285e-05	3.63877e-05
2.3	4	3	0.00101966	0.0196959	7.92e-06	2.51e-05	0.00470919	0.00626939	2.51121e-05	3.6878e-05
2.5	4	3	0.000975785	0.0204746	7.38e-06	2.64e-05	0.00482622	0.00651728	2.64116e-05	3.74641e-05
2.9	4	3	0.000896037	0.0219192	6.26e-06	2.86e-05	0.00507204	0.00697711	2.86283e-05	3.85627e-05
1.5	4	4	0.00119823	0.0170264	9.74e-06	2.06e-05	0.00430946	0.00541966	2.06457e-05	3.64021e-05
1.7	4	4	0.00111857	0.0178416	9.22e-06	2.21e-05	0.00442249	0.00567916	2.20562e-05	3.56325e-05
2.1	4	4	0.00100045	0.0197833	8.18e-06	2.57e-05	0.00465218	0.00629721	2.56756e-05	3.71683e-05
2.3	4	4	0.000952692	0.0205866	7.64e-06	2.7e-05	0.0047708	0.00655291	2.70448e-05	3.77758e-05
2.5	4	4	0.000906955	0.021363	7.07e-06	2.83e-05	0.00489504	0.00680006	2.83034e-05	3.84015e-05
2.9	4	4	0.00082944	0.0226905	5.91e-06	3.02e-05	0.00514929	0.00722262	3.01551e-05	3.92226e-05
1.5	4	5	0.00140477	0.0171984	1.03e-05	2.17e-05	0.00418554	0.00547443	2.17184e-05	3.48633e-05
1.7	4	5	0.00105498	0.0187083	9.03e-06	2.4e-05	0.00446573	0.00595503	2.4e-05	3.64395e-05
1.9	4	5	0.000996595	0.0196299	8.5e-06	2.57e-05	0.00458043	0.00624838	2.57102e-05	3.71059e-05
2.3	4	5	0.000891268	0.0213301	7.38e-06	2.87e-05	0.00482731	0.00678957	2.86574e-05	3.85313e-05
2.5	4	5	0.000850372	0.0219799	6.81e-06	2.96e-05	0.00495163	0.00699641	2.95783e-05	3.8859e-05
1.5	4	6	0.00107019	0.0183361	9.39e-06	2.35e-05	0.00438629	0.00583656	2.35005e-05	3.61977e-05
1.7	4	6	0.00100044	0.0194022	8.86e-06	2.56e-05	0.00450282	0.0061759	2.55851e-05	3.70822e-05
1.9	4	6	0.000941347	0.0203078	8.31e-06	2.72e-05	0.00462242	0.00646418	2.72453e-05	3.77972e-05
2.1	4	6	0.000887449	0.0211316	7.74e-06	2.87e-05	0.0047471	0.00672639	2.86527e-05	3.84297e-05
2.3	4	6	0.00083872	0.0218806	7.16e-06	2.98e-05	0.00487566	0.0069648	2.98232e-05	3.89561e-05
2.5	4	6	0.000795004	0.0225403	6.56e-06	3.07e-05	0.005007	0.00717479	3.07188e-05	3.92934e-05
1.5	4	7	0.0010194	0.0189731	9.25e-06	2.5e-05	0.00441676	0.00603932	2.49769e-05	3.67786e-05
1.7	4	7	0.000949475	0.0200112	8.7e-06	2.7e-05	0.00453748	0.00636975	2.69925e-05	3.76892e-05
1.9	4	7	0.000888432	0.0209204	8.13e-06	2.86e-05	0.00466263	0.00665917	2.86418e-05	3.84641e-05
2.1	4	7	0.000835578	0.0216833	7.55e-06	2.99e-05	0.00479067	0.00690202	2.98657e-05	3.89564e-05
2.3	4	7	0.000787803	0.0223656	6.95e-06	3.08e-05	0.0049225	0.00711918	3.08287e-05	3.93111e-05
1.3	4	8	0.00104986	0.0184305	9.66e-06	2.41e-05	0.00432775	0.00586662	2.40836e-05	3.64676e-05
1.5	4	8	0.000972663	0.0195318	9.12e-06	2.63e-05	0.0044448	0.00621716	2.62913e-05	3.73282e-05
1.7	4	8	0.000901274	0.0205677	8.55e-06	2.83e-05	0.00457025	0.00654689	2.82936e-05	3.83048e-05
1.9	4	8	0.000845159	0.0213352	7.98e-06	2.96e-05	0.00469552	0.00679119	2.95604e-05	3.87323e-05
2.3	4	8	0.000742805	0.0227314	6.76e-06	3.15e-05	0.0049639	0.00723563	3.15477e-05	3.94712e-05
2.7	4	8	0.000650609	0.024011	5.43e-06	3.3e-05	0.00525406	0.00764294	3.29957e-05	4.0044e-05
1.5	4	9	0.000925514	0.0200917	8.99e-06	2.76e-05	0.00447309	0.00639538	2.76318e-05	3.80058e-05
1.7	4	9	0.000859277	0.0209841	8.42e-06	2.93e-05	0.00459881	0.00667944	2.92525e-05	3.86417e-05
1.9	4	9	0.000800362	0.0217601	7.82e-06	3.05e-05	0.00472956	0.00692644	3.05065e-05	3.91118e-05
2.1	4	9	0.000745673	0.0224741	7.2e-06	3.15e-05	0.0048662	0.00715372	3.15312e-05	3.94993e-05
2.3	4	9	0.000696175	0.0231125	6.56e-06	3.23e-05	0.0050068	0.00735695	3.22999e-05	3.97439e-05
2.5	4	9	0.00064819	0.0237429	5.89e-06	3.3e-05	0.00515381	0.00755761	3.29841e-05	3.9991e-05
1.5	4	10	0.000884958	0.0205177	8.88e-06	2.86e-05	0.00449743	0.00653098	2.86486e-05	3.84214e-05
1.7	4	10	0.000819772	0.0213453	8.3e-06	3.01e-05	0.00462568	0.00679441	3.0077e-05	3.89195e-05
1.9	4	10	0.000757957	0.0221309	7.68e-06	3.13e-05	0.00476179	0.00704449	3.132e-05	3.9431e-05
2.1	4	10	0.000704309	0.0227865	7.04e-06	3.22e-05	0.00490094	0.00725315	3.21575e-05	3.96732e-05
2.3	4	10	0.000652004	0.0234348	6.38e-06	3.29e-05	0.00504744	0.00745953	3.29049e-05	3.99311e-05
2.5	4	10	0.000605344	0.024009	5.7e-06	3.34e-05	0.00519666	0.00764229	3.34093e-05	4.00293e-05

## Sheet: (32,30.3)
																					whole potentials of the equilibrium droplet		the unit length energy barrier
0	0	0	0.001934	0	1.18e-05	1.18e-05	0.003868	0.003868	0	4.70027e-05		(0,0,0)	4.083	-248	2.091	3.453	-760.7	-118.2	170		2.744e-06		2.9e-06
0.2	0	0	0.00185623	0.00942752	1.17e-05	1.18e-05	0.00387422	0.00388355	7.06133e-06	4.51951e-05		(1,0,0)	-1.15	992.6	21.92	51.65	2801	538.3	-385.8
0.4	0	0	0.00179802	0.0114238	1.17e-05	1.18e-05	0.00388976	0.00392239	1.03269e-05	4.40038e-05		(0,1,0)	-2.706	-4.304	-0.4919	-0.5556	-16.79	-8.108	1.128
0.8	0	0	0.00167352	0.0128896	1.14e-05	1.29e-05	0.00395135	0.00410289	1.29408e-05	4.20177e-05		(0,0,1)	-2.267	3.741	-0.2306	0.005031	7.976	5.467	-0.5116
1.2	0	0	0.00155891	0.0144984	1.09e-05	1.6e-05	0.00404804	0.00461498	1.59752e-05	3.99401e-05		(2,0,0)	4.776	-1241	-41.01	-102.3	-3415	-695.8	410.5
1.6	0	0	0.0014395	0.0158188	1.03e-05	1.84e-05	0.00418448	0.00503529	1.83786e-05	3.79449e-05		(1,1,0)	4.181	10.33	1.283	1.951	27.38	18.29	-3.689
2	0	0	0.00120466	0.0171801	9.09e-06	2.03e-05	0.00445147	0.00546859	2.03087e-05	3.69441e-05		(1,0,1)	4.023	-8.969	0.272	-0.3896	-24.25	-11.23	2.343
2.1	0	0	0.00117446	0.0175683	8.84e-06	2.1e-05	0.00450601	0.00559217	2.09612e-05	3.67583e-05		(0,2,0)	0.03715	-0.0519	-0.005371	-0.01927	0.05142	-0.05446	0.01525
2.2	0	0	0.00114641	0.0179226	8.59e-06	2.15e-05	0.00456108	0.00570494	2.1531e-05	3.65495e-05		(0,1,1)	0.05334	0.108	0.01148	0.01585	0.3845	0.1576	-0.001441
2.3	0	0	0.00112021	0.0182481	8.34e-06	2.2e-05	0.00461669	0.00580855	2.20286e-05	3.63236e-05		(0,0,2)	0.03167	-0.03523	0.001857	-0.00309	-0.04607	-0.08255	-0.02056
2.4	0	0	0.00109562	0.0185493	8.08e-06	2.25e-05	0.00467285	0.00590443	2.24635e-05	3.60864e-05		(3,0,0)	-1.754	657.6	29.07	71.8	1759	374.6	-192.5
2.5	0	0	0.00107458	0.018837	7.83e-06	2.29e-05	0.00472742	0.00601656	2.28725e-05	3.59354e-05		(2,1,0)	-2.261	-8.674	-1.161	-1.996	-16.13	-13.97	3.398
2.6	0	0	0.0010546	0.0191086	7.58e-06	2.32e-05	0.00478258	0.00615444	2.32376e-05	3.57773e-05		(2,0,1)	-2.322	7.091	-0.05971	0.4924	20.65	7.514	-2.51
2.7	0	0	0.00103559	0.0194627	7.33e-06	2.38e-05	0.00483829	0.00629372	2.37992e-05	3.59709e-05		(1,2,0)	-0.03458	0.1134	0.01579	0.03944	0.01671	0.1164	-0.0181
2.8	0	0	0.00101935	0.0197724	7.08e-06	2.43e-05	0.00489241	0.00642903	2.426e-05	3.60896e-05		(1,1,1)	-0.06091	-0.1644	-0.01989	-0.03135	-0.4262	-0.233	0.0198
2.9	0	0	0.001002	0.0201192	6.82e-06	2.48e-05	0.00494912	0.00657081	2.47965e-05	3.63169e-05		(1,0,2)	-0.03893	0.04505	-0.002252	0.004352	0.09043	0.1091	0.02276
3	0	0	0.000987177	0.0204166	6.57e-06	2.52e-05	0.00500419	0.00670847	2.5219e-05	3.64405e-05		(0,3,0)	-0.0003067	-0.0009716	-0.0001804	-0.0002972	-0.0003732	-0.0008504	-0.0001875
3.2	0	0	0.000957819	0.0210119	6.06e-06	2.6e-05	0.00511751	0.00699178	2.60416e-05	3.67085e-05		(0,2,1)	-0.0002245	0.0009962	0.0001325	0.0003053	-0.001283	0.000831	-8.642e-05
3.4	0	0	0.000929823	0.0216009	5.53e-06	2.68e-05	0.00523368	0.0072822	2.68239e-05	3.70401e-05		(0,1,2)	-0.0003661	-0.0008946	-8.834e-05	-0.0001383	-0.002588	-0.001069	-0.0001232
3.6	0	0	0.000903837	0.0221606	4.99e-06	2.75e-05	0.00535143	0.00757659	2.75154e-05	3.73538e-05		(0,0,3)	-0.0001369	0.000254	1.517e-06	3.332e-05	0.0003278	0.0004937	0.0001574
3.8	0	0	0.000878659	0.0227293	4.44e-06	2.82e-05	0.00547212	0.0078783	2.82028e-05	3.77327e-05		(4,0,0)	0.1609	-126.9	-6.989	-16.89	-329.6	-73.43	34.31
4	0	0	0.000856038	0.0232456	3.89e-06	2.88e-05	0.00559274	0.00817985	2.87511e-05	3.80193e-05		(3,1,0)	0.4585	2.582	0.3651	0.6571	3.547	3.62	-0.9559
4.2	0	0	0.000834669	0.0237595	3.33e-06	2.93e-05	0.00571488	0.00848519	2.92756e-05	3.83372e-05		(3,0,1)	0.4174	-1.873	-0.02214	-0.1711	-5.386	-1.622	0.7719
2.3	0	-5	0.00190577	0.00924638	1.16e-05	1.19e-05	0.00389397	0.00393292	6.75808e-06	4.28636e-05		(2,2,0)	0.004269	-0.06432	-0.009608	-0.01999	-0.03604	-0.05769	0.005825
1.9	0	-4	0.00188522	0.00923304	1.16e-05	1.19e-05	0.00390507	0.00396069	6.71935e-06	3.53717e-05		(2,1,1)	0.02086	0.06303	0.008867	0.0142	0.1234	0.08747	-0.01195
2.3	0	-4	0.00175424	0.0115485	1.1e-05	1.25e-05	0.00403337	0.00428144	1.01735e-05	4.06097e-05		(2,0,2)	0.01148	-0.01293	0.0007045	-0.001337	-0.03612	-0.03472	-0.006066
1.7	0	-3	0.00188303	0.00945258	1.16e-05	1.19e-05	0.00390266	0.00395466	7.04705e-06	4.27472e-05		(1,3,0)	0.0003325	0.001078	0.000174	0.0002652	0.0005978	0.0006648	4.566e-05
1.9	0	-3	0.00171564	0.0135858	1.1e-05	1.41e-05	0.00403395	0.0043245	1.40775e-05	4.1757e-05		(1,2,1)	-0.0001164	-0.0009777	-0.0001552	-0.0002672	0.0002117	-0.0008118	7.118e-05
2.3	0	-3	0.00153606	0.0141166	1.01e-05	1.45e-05	0.0042341	0.00478326	1.44573e-05	4.15184e-05		(1,1,2)	0.0002288	0.0007202	7.821e-05	0.0001279	0.001503	0.0007874	1.6e-05
1.5	0	-2	0.0018474	0.00991952	1.15e-05	1.2e-05	0.00391996	0.00399791	7.72603e-06	4.18361e-05		(1,0,3)	8.588e-05	-0.0001625	-5.189e-07	-2.064e-05	-0.0002449	-0.0003325	-9.635e-05
1.7	0	-2	0.00170871	0.0119008	1.11e-05	1.24e-05	0.0040212	0.00425099	1.08371e-05	4.19494e-05		(0,4,0)	-2.387e-06	-4.215e-06	-5.497e-07	-3.285e-07	-8.952e-06	7.941e-07	2.393e-06
2.3	0	-2	0.00137309	0.0161365	9.4e-06	1.82e-05	0.00438403	0.00515808	1.82104e-05	3.61874e-05		(0,3,1)	4.993e-06	5.647e-06	1.185e-06	1.128e-06	7.545e-06	3.259e-06	-6.866e-07
1.5	0	-1	0.00167567	0.0122043	1.1e-05	1.25e-05	0.004023	0.0042555	1.13916e-05	4.14444e-05		(0,2,2)	1.328e-07	-3.545e-06	-4.916e-07	-9.889e-07	4.549e-06	-2.26e-06	4.918e-07
1.7	0	-1	0.00151955	0.0140069	1.05e-05	1.45e-05	0.00414983	0.00457257	1.45342e-05	3.9926e-05		(0,1,3)	7.867e-07	1.967e-06	1.89e-07	3.391e-07	5.144e-06	2.297e-06	5.121e-07
2.3	0	-1	0.00130628	0.0183039	9.12e-06	2.31e-05	0.0044455	0.00582632	2.30857e-05	3.82312e-05		(0,0,4)	1.739e-07	-6.441e-07	-2.509e-08	-9.281e-08	-9.625e-07	-9.799e-07	-3.327e-07
2.5	0	-1	0.0011799	0.0178912	8.31e-06	2.11e-05	0.0046221	0.00575324	2.11483e-05	3.64789e-05
1.5	0	1	0.00140401	0.0153663	1.03e-05	1.73e-05	0.00418599	0.00489123	1.73355e-05	3.77861e-05
1.7	0	1	0.00133684	0.0164783	9.9e-06	1.95e-05	0.00427407	0.00524521	1.95065e-05	3.71204e-05
1.9	0	1	0.00118528	0.0174305	9.16e-06	2.1e-05	0.00443702	0.00554829	2.09778e-05	3.64273e-05
2.3	0	1	0.00107052	0.0189883	8.13e-06	2.36e-05	0.0046624	0.00604418	2.35971e-05	3.62924e-05
1.5	0	2	0.00135006	0.0162682	1.02e-05	1.93e-05	0.00421836	0.00517832	1.9275e-05	3.66144e-05
1.7	0	2	0.00118093	0.017325	9.42e-06	2.1e-05	0.00438009	0.00551472	2.10118e-05	3.63212e-05
2.3	0	2	0.00100777	0.0198593	7.87e-06	2.55e-05	0.00472013	0.0063214	2.54655e-05	3.70385e-05
2.7	0	2	0.000922279	0.0213818	6.77e-06	2.79e-05	0.00496066	0.00680604	2.79333e-05	3.82266e-05
2.9	0	2	0.000883115	0.0220916	6.2e-06	2.9e-05	0.00508703	0.00703198	2.89831e-05	3.87679e-05
1.5	0	3	0.00118936	0.0170814	9.71e-06	2.08e-05	0.00431478	0.00543717	2.07523e-05	3.62722e-05
1.7	0	3	0.00111433	0.0179017	9.21e-06	2.22e-05	0.00442537	0.00569828	2.21895e-05	3.56788e-05
2.1	0	3	0.00099635	0.0198321	8.16e-06	2.58e-05	0.00465563	0.00631276	2.57818e-05	3.71972e-05
2.3	0	3	0.000948483	0.0206351	7.62e-06	2.71e-05	0.00477468	0.00656837	2.71482e-05	3.78086e-05
2.5	0	3	0.000902561	0.0214193	7.05e-06	2.84e-05	0.00489944	0.00681799	2.84243e-05	3.84628e-05
2.9	0	3	0.000824629	0.0227418	5.89e-06	3.03e-05	0.00515487	0.00723892	3.02539e-05	3.92608e-05
1.5	0	4	0.00140437	0.0172055	1.03e-05	2.17e-05	0.00418578	0.00547669	2.1735e-05	3.48928e-05
1.7	0	4	0.00105483	0.0187187	9.03e-06	2.4e-05	0.00446584	0.00595835	2.40262e-05	3.64818e-05
1.9	0	4	0.000996453	0.0196341	8.5e-06	2.57e-05	0.00458054	0.00624972	2.57206e-05	3.71229e-05
2.3	0	4	0.000891152	0.0213421	7.38e-06	2.87e-05	0.00482742	0.00679341	2.86891e-05	3.85755e-05
2.5	0	4	0.000850267	0.0219849	6.81e-06	2.96e-05	0.00495173	0.00699802	2.95912e-05	3.88774e-05
1.5	0	5	0.00107397	0.0182945	9.4e-06	2.34e-05	0.00438402	0.00582332	2.34069e-05	3.61883e-05
1.7	0	5	0.00100418	0.0193566	8.87e-06	2.55e-05	0.00450028	0.0061614	2.54806e-05	3.70437e-05
1.9	0	5	0.000945196	0.0202632	8.33e-06	2.71e-05	0.00461949	0.00644998	2.71444e-05	3.77565e-05
2.3	0	5	0.000842982	0.0218356	7.18e-06	2.97e-05	0.00487174	0.00695049	2.97274e-05	3.89138e-05
2.5	0	5	0.000799488	0.0224946	6.58e-06	3.06e-05	0.00500251	0.00716024	3.06253e-05	3.92508e-05
1.5	0	6	0.00102322	0.0189501	9.26e-06	2.49e-05	0.00441447	0.00603201	2.49303e-05	3.68636e-05
1.7	0	6	0.000957163	0.0199204	8.72e-06	2.68e-05	0.00453225	0.00634086	2.67815e-05	3.75851e-05
1.9	0	6	0.000896449	0.0208229	8.16e-06	2.84e-05	0.00465654	0.00662813	2.8416e-05	3.83313e-05
2.3	0	6	0.000792783	0.0223399	6.97e-06	3.08e-05	0.00491792	0.007111	3.079e-05	3.936e-05
2.5	0	6	0.00075057	0.0229406	6.36e-06	3.15e-05	0.00505143	0.00730222	3.15035e-05	3.95485e-05
1.3	0	7	0.00105755	0.0183482	9.67e-06	2.39e-05	0.00432375	0.00584042	2.38923e-05	3.64458e-05
1.5	0	7	0.000980365	0.0194476	9.14e-06	2.61e-05	0.00444018	0.00619037	2.60942e-05	3.72719e-05
1.7	0	7	0.000909337	0.0204852	8.58e-06	2.81e-05	0.00456477	0.00652064	2.81036e-05	3.82431e-05
1.9	0	7	0.000849958	0.0213243	8e-06	2.96e-05	0.00469187	0.00678773	2.95554e-05	3.88527e-05
2.1	0	7	0.000798626	0.0220258	7.4e-06	3.06e-05	0.00482171	0.00701103	3.05968e-05	3.91979e-05
2.3	0	7	0.000748553	0.0227139	6.78e-06	3.15e-05	0.00495861	0.00723005	3.15368e-05	3.95625e-05
2.5	0	7	0.000703801	0.0233312	6.14e-06	3.22e-05	0.0050982	0.00742655	3.22463e-05	3.97903e-05
1.5	0	8	0.00093718	0.0199506	9.03e-06	2.73e-05	0.00446609	0.00635048	2.7291e-05	3.78147e-05
1.7	0	8	0.000867822	0.0209138	8.45e-06	2.91e-05	0.004593	0.00665706	2.90967e-05	3.86304e-05
1.9	0	8	0.000809566	0.0216899	7.86e-06	3.04e-05	0.00472257	0.00690411	3.03595e-05	3.90974e-05
2.1	0	8	0.000755545	0.022403	7.24e-06	3.14e-05	0.0048579	0.00713111	3.13918e-05	3.94817e-05
2.3	0	8	0.000706711	0.0230323	6.61e-06	3.21e-05	0.00499711	0.0073314	3.21461e-05	3.9698e-05
2.5	0	8	0.000659389	0.0236598	5.94e-06	3.28e-05	0.00514261	0.00753115	3.2835e-05	3.99414e-05
1.5	0	9	0.000897003	0.0203869	8.92e-06	2.83e-05	0.0044902	0.00648935	2.83335e-05	3.82667e-05
1.7	0	9	0.000828857	0.0212847	8.33e-06	3e-05	0.0046195	0.00677514	2.99502e-05	3.89453e-05
1.9	0	9	0.00077168	0.021999	7.73e-06	3.1e-05	0.00475136	0.00700251	3.10227e-05	3.92669e-05
2.1	0	9	0.000714948	0.0227175	7.08e-06	3.2e-05	0.004892	0.00723119	3.20283e-05	3.96661e-05
2.3	0	9	0.000663418	0.0233634	6.42e-06	3.28e-05	0.00503694	0.00743679	3.27818e-05	3.99208e-05
1.5	0	10	0.000859646	0.0207648	8.81e-06	2.92e-05	0.00451261	0.00660964	2.92366e-05	3.86417e-05
1.7	0	10	0.000792515	0.0215919	8.21e-06	3.06e-05	0.00464421	0.00687293	3.06423e-05	3.91529e-05
1.9	0	10	0.000732564	0.0223094	7.59e-06	3.17e-05	0.00478109	0.0071013	3.16853e-05	3.9489e-05
2.1	0	10	0.000677002	0.0229697	6.94e-06	3.25e-05	0.00492388	0.00731149	3.25066e-05	3.97421e-05
2.3	0	10	0.000622776	0.0236328	6.25e-06	3.33e-05	0.00507433	0.00752254	3.32622e-05	4.0034e-05
2.5	0	10	0.000574216	0.0242161	5.55e-06	3.38e-05	0.00522778	0.00770821	3.37559e-05	4.01394e-05
2.7	0	10	0.00052834	0.024782	4.83e-06	3.42e-05	0.00538611	0.00788836	3.41528e-05	4.02044e-05
2.3	1	-4	0.00192091	0.00856336	1.17e-05	1.18e-05	0.00388004	0.00389811	5.81738e-06	4.33313e-05
1.9	1	-3	0.00188448	0.00927798	1.16e-05	1.19e-05	0.00390563	0.00396208	6.78394e-06	3.53973e-05
2.3	1	-3	0.00174555	0.0116304	1.1e-05	1.25e-05	0.00404137	0.00430143	1.02974e-05	4.0419e-05
1.7	1	-2	0.00185423	0.00994853	1.15e-05	1.2e-05	0.00392225	0.00400361	7.76674e-06	4.27077e-05
1.9	1	-2	0.00165985	0.0149985	1.08e-05	1.7e-05	0.00407636	0.00477416	1.69746e-05	4.39504e-05
2.3	1	-2	0.00148171	0.0143712	9.85e-06	1.48e-05	0.00428411	0.00490828	1.48002e-05	3.62702e-05
1.5	1	-1	0.00179097	0.0107007	1.14e-05	1.21e-05	0.00395382	0.00408254	8.91313e-06	4.15704e-05
1.7	1	-1	0.00164861	0.0126283	1.09e-05	1.26e-05	0.00406206	0.00435316	1.2077e-05	4.17272e-05
2.3	1	-1	0.0013399	0.0170071	9.26e-06	2.01e-05	0.00441457	0.00541351	2.00794e-05	3.71016e-05
1.5	1	0	0.00159776	0.013044	1.08e-05	1.29e-05	0.00406975	0.00437236	1.28602e-05	4.01215e-05
1.7	1	0	0.00146424	0.0146734	1.03e-05	1.58e-05	0.00418744	0.00467068	1.58017e-05	3.92945e-05
2.3	1	0	0.00129692	0.0191177	9.08e-06	2.51e-05	0.00445411	0.00608536	2.51321e-05	3.91146e-05
2.5	1	0	0.00114641	0.0182261	8.16e-06	2.18e-05	0.00465559	0.00583697	2.17754e-05	3.61374e-05
1.5	1	1	0.00145057	0.0147422	1.04e-05	1.61e-05	0.00415806	0.0046926	1.60674e-05	3.84228e-05
1.7	1	1	0.00136153	0.0160169	9.98e-06	1.85e-05	0.00425728	0.00509834	1.85056e-05	3.7687e-05
2.3	1	1	0.0011103	0.0183893	8.3e-06	2.23e-05	0.00462581	0.00585351	2.23229e-05	3.56767e-05
2.5	1	1	0.0010621	0.019267	7.78e-06	2.39e-05	0.0047399	0.00613287	2.38592e-05	3.63696e-05
1.5	1	2	0.00136978	0.0158959	1.02e-05	1.85e-05	0.00420653	0.00505981	1.84568e-05	3.71849e-05
1.7	1	2	0.00132452	0.0168405	9.86e-06	2.03e-05	0.00428244	0.00536049	2.03315e-05	3.64148e-05
1.9	1	2	0.00114316	0.0177767	9.01e-06	2.17e-05	0.00446904	0.00565851	2.16523e-05	3.59075e-05
2.3	1	2	0.0010352	0.0194967	7.98e-06	2.47e-05	0.0046949	0.00620598	2.46889e-05	3.6764e-05
2.5	1	2	0.000991508	0.0202729	7.46e-06	2.6e-05	0.00481049	0.00645306	2.59876e-05	3.73129e-05
2.9	1	2	0.000912853	0.021716	6.35e-06	2.82e-05	0.00505253	0.00691243	2.8223e-05	3.83977e-05
1.5	1	3	0.00122488	0.0168231	9.81e-06	2.02e-05	0.00429347	0.00535495	2.02347e-05	3.67725e-05
1.7	1	3	0.00113888	0.0176623	9.29e-06	2.17e-05	0.00440868	0.00562209	2.16873e-05	3.58214e-05
1.9	1	3	0.00107465	0.0186127	8.77e-06	2.34e-05	0.0045211	0.00592461	2.34429e-05	3.62354e-05
2.1	1	3	0.0010198	0.0195277	8.25e-06	2.51e-05	0.00463592	0.00621587	2.51124e-05	3.69303e-05
2.3	1	3	0.00169001	0.0210186	1.07e-05	3.32e-05	0.00409247	0.00669044	3.32012e-05	3.973e-05
2.9	1	3	0.000851698	0.0224285	6.03e-06	2.96e-05	0.00512347	0.0071392	2.9632e-05	3.89553e-05
1.5	1	4	0.0011509	0.0174259	9.61e-06	2.15e-05	0.00433786	0.00554685	2.14767e-05	3.5938e-05
1.7	1	4	0.00107837	0.0183929	9.1e-06	2.33e-05	0.00444983	0.00585465	2.32865e-05	3.61184e-05
2.3	1	4	0.00091203	0.0210945	7.47e-06	2.82e-05	0.00480821	0.00671458	2.81514e-05	3.83242e-05
2.5	1	4	0.000868337	0.021809	6.89e-06	2.92e-05	0.00493366	0.00694202	2.92392e-05	3.88056e-05
2.7	1	4	0.000830591	0.0224239	6.32e-06	3e-05	0.00505968	0.00713774	3.00446e-05	3.90832e-05
2.9	1	4	0.000791092	0.0230831	5.71e-06	3.09e-05	0.00519377	0.00734757	3.09018e-05	3.9483e-05
1.5	1	5	0.00108988	0.0181007	9.44e-06	2.3e-05	0.00437447	0.00576162	2.29666e-05	3.60967e-05
1.7	1	5	0.00102357	0.0191029	8.93e-06	2.49e-05	0.00448709	0.00608065	2.48955e-05	3.67521e-05
1.9	1	5	0.000961218	0.020085	8.38e-06	2.67e-05	0.00460731	0.00639326	2.67458e-05	3.76331e-05
2.1	1	5	0.000908289	0.0209085	7.82e-06	2.82e-05	0.0047296	0.00665538	2.81653e-05	3.82556e-05
2.3	1	5	0.000860699	0.0216483	7.25e-06	2.93e-05	0.00485544	0.00689086	2.93288e-05	3.87507e-05
2.7	1	5	0.000773839	0.0230056	6.04e-06	3.12e-05	0.00512097	0.0073229	3.11938e-05	3.95556e-05
1.5	1	6	0.0016215	0.0174547	1.09e-05	2.31e-05	0.0040555	0.00555599	2.31106e-05	3.40237e-05
1.7	1	6	0.000972896	0.0197322	8.77e-06	2.63e-05	0.00452155	0.00628097	2.6345e-05	3.73881e-05
1.9	1	6	0.000912852	0.0206352	8.21e-06	2.8e-05	0.00464407	0.00656838	2.79878e-05	3.81246e-05
2.3	1	6	0.000811008	0.0221478	7.04e-06	3.04e-05	0.00490115	0.00704985	3.03786e-05	3.91444e-05
2.5	1	6	0.00076576	0.0228129	6.43e-06	3.13e-05	0.00503624	0.00726156	3.126e-05	3.94882e-05
1.3	1	7	0.00107325	0.0181435	9.71e-06	2.34e-05	0.00431559	0.00577524	2.34086e-05	3.62061e-05
1.5	1	7	0.000992136	0.0193202	9.18e-06	2.58e-05	0.00443312	0.00614982	2.57973e-05	3.71998e-05
1.7	1	7	0.000925315	0.0202899	8.63e-06	2.76e-05	0.00455391	0.00645847	2.76415e-05	3.79755e-05
1.9	1	7	0.000866753	0.0211279	8.05e-06	2.91e-05	0.00467911	0.00672523	2.91004e-05	3.85789e-05
2.3	1	7	0.000763256	0.0225856	6.84e-06	3.13e-05	0.00494508	0.00718921	3.12773e-05	3.94659e-05
2.5	1	7	0.000719316	0.023192	6.22e-06	3.2e-05	0.00508268	0.00738224	3.19732e-05	3.96631e-05
1.5	1	8	0.000949059	0.0198179	9.06e-06	2.7e-05	0.00445896	0.00630823	2.69752e-05	3.76826e-05
1.7	1	8	0.000880358	0.020782	8.49e-06	2.88e-05	0.00458448	0.0066151	2.87891e-05	3.84906e-05
1.9	1	8	0.000822906	0.0215573	7.9e-06	3.01e-05	0.00471243	0.00686191	3.00604e-05	3.89528e-05
2.1	1	8	0.000769707	0.0222612	7.29e-06	3.11e-05	0.00484601	0.00708597	3.10803e-05	3.93073e-05
2.3	1	8	0.00071773	0.0229617	6.65e-06	3.2e-05	0.00498697	0.00730892	3.20225e-05	3.97063e-05
1.5	1	9	0.000909054	0.0202489	8.95e-06	2.8e-05	0.00448297	0.00644541	2.79995e-05	3.8085e-05
1.7	1	9	0.000841655	0.0211468	8.37e-06	2.96e-05	0.00461079	0.00673123	2.9624e-05	3.87578e-05
1.9	1	9	0.000781442	0.0219237	7.76e-06	3.09e-05	0.00474394	0.00697854	3.08638e-05	3.92354e-05
2.3	1	9	0.000674644	0.0232841	6.47e-06	3.26e-05	0.00502661	0.00741158	3.26355e-05	3.9882e-05
1.5	1	10	0.000868179	0.0206839	8.84e-06	2.9e-05	0.00450749	0.0065839	2.90448e-05	3.85783e-05
1.7	1	10	0.000801755	0.0215184	8.24e-06	3.05e-05	0.00463793	0.00684952	3.04789e-05	3.9111e-05
1.9	1	10	0.000742525	0.022235	7.62e-06	3.15e-05	0.00477352	0.00707761	3.15294e-05	3.94433e-05
2.1	1	10	0.000687685	0.0228932	6.98e-06	3.24e-05	0.0049149	0.00728714	3.23564e-05	3.96924e-05
2.3	1	10	0.000634182	0.0235457	6.3e-06	3.31e-05	0.00506383	0.00749483	3.30952e-05	3.99554e-05
2.5	1	10	0.000586338	0.0241252	5.61e-06	3.36e-05	0.00521566	0.0076793	3.35926e-05	4.00583e-05
2.7	1	10	0.000536858	0.0247589	4.87e-06	3.42e-05	0.00537691	0.007881	3.4157e-05	4.02875e-05
2.9	1	10	0.000494459	0.0252948	4.14e-06	3.44e-05	0.00553787	0.00805159	3.4442e-05	4.02809e-05
2.3	2	-3	0.00190721	0.0092691	1.16e-05	1.19e-05	0.00389265	0.00392962	6.79364e-06	4.44272e-05
1.9	2	-2	0.00181582	0.0110865	1.13e-05	1.22e-05	0.00395781	0.00409254	9.55774e-06	3.79633e-05
2.3	2	-2	0.00163208	0.0127758	1.05e-05	1.3e-05	0.00414577	0.00456242	1.2104e-05	3.85544e-05
1.5	2	-1	0.00188537	0.00930747	1.16e-05	1.19e-05	0.00389718	0.00394094	6.84201e-06	4.20163e-05
1.7	2	-1	0.00176077	0.01127	1.12e-05	1.23e-05	0.0039858	0.00416249	9.80639e-06	4.23618e-05
2.3	2	-1	0.00139968	0.0155146	9.51e-06	1.69e-05	0.00435958	0.00509694	1.6934e-05	3.56177e-05
1.5	2	0	0.00169231	0.0120223	1.11e-05	1.24e-05	0.00401301	0.00423053	1.10825e-05	4.16072e-05
1.7	2	0	0.00153274	0.0138629	1.05e-05	1.43e-05	0.00414086	0.00455015	1.42688e-05	4.00957e-05
2.3	2	0	0.00130425	0.0183086	9.11e-06	2.31e-05	0.00444737	0.0058278	2.30871e-05	3.83991e-05
1.5	2	1	0.00149626	0.0141498	1.06e-05	1.49e-05	0.00413065	0.00452462	1.49036e-05	3.88917e-05
1.7	2	1	0.00139479	0.0155424	1.01e-05	1.75e-05	0.00423467	0.00494729	1.75227e-05	3.82824e-05
2.3	2	1	0.00114285	0.0181002	8.43e-06	2.18e-05	0.00459586	0.00576148	2.17798e-05	3.60335e-05
2.5	2	1	0.00109379	0.018786	7.92e-06	2.29e-05	0.00470821	0.00597978	2.28508e-05	3.59176e-05
1.5	2	2	0.00139234	0.0155291	1.03e-05	1.77e-05	0.00419299	0.00494306	1.76741e-05	3.75875e-05
1.7	2	2	0.00125279	0.0167186	9.64e-06	1.98e-05	0.00433122	0.00532169	1.98005e-05	3.72026e-05
1.9	2	2	0.00117247	0.0175331	9.11e-06	2.12e-05	0.00444676	0.00558095	2.11758e-05	3.62569e-05
2.3	2	2	0.00141205	0.0207707	9.56e-06	3.04e-05	0.00434819	0.00661151	3.04357e-05	4.01269e-05
2.5	2	2	0.00101509	0.0199589	7.56e-06	2.53e-05	0.00478691	0.00635313	2.53264e-05	3.70602e-05
2.9	2	2	0.000937686	0.0213952	6.48e-06	2.76e-05	0.00502372	0.00681032	2.75731e-05	3.80944e-05
1.5	2	3	0.00134556	0.0164271	1.01e-05	1.96e-05	0.00422106	0.00522891	1.96403e-05	3.64092e-05
1.7	2	3	0.00116389	0.0174677	9.36e-06	2.13e-05	0.00439168	0.00556015	2.12995e-05	3.61295e-05
2.3	2	3	0.000992162	0.0200794	7.8e-06	2.59e-05	0.00473449	0.00639147	2.59463e-05	3.72956e-05
2.5	2	3	0.000947774	0.0208553	7.26e-06	2.72e-05	0.00485423	0.00663844	2.7227e-05	3.79002e-05
2.7	2	3	0.000909628	0.0215258	6.71e-06	2.82e-05	0.00497432	0.00685187	2.82233e-05	3.83159e-05
2.9	2	3	0.000869889	0.0222379	6.13e-06	2.93e-05	0.00510237	0.00707853	2.92677e-05	3.88609e-05
1.5	2	4	0.00117201	0.0172594	9.67e-06	2.11e-05	0.0043252	0.00549385	2.11334e-05	3.61791e-05
1.7	2	4	0.00141073	0.0175448	1.01e-05	2.24e-05	0.00422382	0.00558467	2.23885e-05	3.50814e-05
2.1	2	4	0.000980609	0.020028	8.1e-06	2.62e-05	0.00466885	0.00637512	2.62123e-05	3.736e-05
2.3	2	4	0.000932268	0.02083	7.55e-06	2.76e-05	0.00478959	0.00663039	2.75681e-05	3.79818e-05
2.9	2	4	0.000810025	0.022875	5.81e-06	3.05e-05	0.00517181	0.00728134	3.04949e-05	3.9288e-05
1.5	2	5	0.00110588	0.0178864	9.49e-06	2.25e-05	0.00436487	0.00569343	2.24785e-05	3.58945e-05
1.7	2	5	0.00103534	0.0189708	8.97e-06	2.46e-05	0.00447909	0.0060386	2.45994e-05	3.67194e-05
1.9	2	5	0.000976925	0.0198857	8.44e-06	2.63e-05	0.00459538	0.0063298	2.62915e-05	3.74037e-05
2.1	2	5	0.000920827	0.0207819	7.87e-06	2.79e-05	0.00471906	0.00661509	2.78936e-05	3.82018e-05
2.3	2	5	0.000873935	0.0215208	7.31e-06	2.91e-05	0.00484326	0.00685028	2.90655e-05	3.86921e-05
2.5	2	5	0.00083213	0.0221667	6.73e-06	3e-05	0.00496987	0.00705587	2.99591e-05	3.89976e-05
2.7	2	5	0.000788571	0.0228656	6.11e-06	3.09e-05	0.00510506	0.00727836	3.09249e-05	3.94658e-05
1.5	2	6	0.00105432	0.0185446	9.35e-06	2.4e-05	0.00439581	0.00590292	2.39826e-05	3.64033e-05
1.7	2	6	0.000984686	0.0195962	8.81e-06	2.6e-05	0.00451353	0.00623766	2.60327e-05	3.72791e-05
1.9	2	6	0.000925116	0.0205003	8.26e-06	2.77e-05	0.00463475	0.00652546	2.76838e-05	3.80071e-05
2.1	2	6	0.000870432	0.0213326	7.68e-06	2.91e-05	0.0047614	0.00679038	2.91038e-05	3.86723e-05
2.3	2	6	0.000820817	0.0220772	7.08e-06	3.02e-05	0.00489213	0.00702739	3.02475e-05	3.91777e-05
2.5	2	6	0.000780135	0.022665	6.49e-06	3.1e-05	0.00502187	0.0072145	3.0956e-05	3.9334e-05
1.5	2	7	0.00100377	0.0191765	9.21e-06	2.55e-05	0.00442614	0.00610406	2.54576e-05	3.70404e-05
1.7	2	7	0.00093728	0.0201482	8.66e-06	2.73e-05	0.00454577	0.00641335	2.73094e-05	3.78063e-05
1.9	2	7	0.000875568	0.0210574	8.09e-06	2.9e-05	0.00467241	0.00670277	2.89517e-05	3.85892e-05
2.3	2	7	0.000773348	0.0225063	6.88e-06	3.11e-05	0.0049358	0.00716397	3.11236e-05	3.94445e-05
2.5	2	7	0.000730021	0.0231107	6.26e-06	3.18e-05	0.00507198	0.00735637	3.18256e-05	3.96384e-05
1.3	2	8	0.00103798	0.0185805	9.63e-06	2.44e-05	0.00433393	0.00591435	2.44402e-05	3.66229e-05
1.5	2	8	0.000957043	0.0197395	9.08e-06	2.68e-05	0.00445417	0.00628327	2.6793e-05	3.76564e-05
1.7	2	8	0.00089255	0.0206347	8.52e-06	2.84e-05	0.00457619	0.00656822	2.84382e-05	3.82731e-05
1.9	2	8	0.00083197	0.0214732	7.93e-06	2.99e-05	0.00470554	0.00683515	2.98743e-05	3.8891e-05
2.1	2	8	0.000779391	0.0221833	7.33e-06	3.09e-05	0.00483787	0.00706117	3.09209e-05	3.92679e-05
2.3	2	8	0.000728044	0.022882	6.69e-06	3.19e-05	0.00497748	0.00728358	3.18691e-05	3.96642e-05
2.5	2	8	0.000682066	0.0234968	6.05e-06	3.25e-05	0.00511993	0.00747926	3.25477e-05	3.98738e-05
1.5	2	9	0.000917167	0.0201661	8.97e-06	2.78e-05	0.0044781	0.00641908	2.78036e-05	3.80177e-05
1.7	2	9	0.000850319	0.0210646	8.39e-06	2.94e-05	0.0046049	0.00670509	2.94352e-05	3.86858e-05
1.9	2	9	0.000790717	0.0218411	7.79e-06	3.07e-05	0.00473689	0.00695223	3.06817e-05	3.91603e-05
2.1	2	9	0.000735336	0.0225565	7.16e-06	3.17e-05	0.00487488	0.00717995	3.16998e-05	3.95519e-05
2.3	2	9	0.000685149	0.0231899	6.52e-06	3.24e-05	0.00501694	0.00738157	3.24423e-05	3.97744e-05
2.5	2	9	0.000636474	0.0238235	5.84e-06	3.31e-05	0.00516553	0.00758324	3.31221e-05	4.00259e-05
1.5	2	10	0.000876443	0.0205973	8.86e-06	2.88e-05	0.00450253	0.00655633	2.88362e-05	3.84768e-05
1.7	2	10	0.000810605	0.0214316	8.27e-06	3.03e-05	0.00463191	0.0068219	3.02765e-05	3.90054e-05
1.9	2	10	0.000751981	0.0221469	7.66e-06	3.13e-05	0.00476633	0.00704959	3.13323e-05	3.93341e-05
2.3	2	10	0.000640788	0.0235201	6.33e-06	3.31e-05	0.00505775	0.00748668	3.30683e-05	4.00033e-05
1.9	3	-2	0.00189517	0.00892146	1.16e-05	1.19e-05	0.00389751	0.00394177	6.28572e-06	3.50345e-05
2.3	3	-2	0.00177349	0.0113101	1.11e-05	1.24e-05	0.00401567	0.00423716	9.80172e-06	4.09115e-05
1.7	3	-1	0.00184408	0.0101166	1.15e-05	1.2e-05	0.00392914	0.00402086	8.01718e-06	4.27218e-05
1.9	3	-1	0.00164107	0.0154975	1.07e-05	1.81e-05	0.00409063	0.00493302	1.80581e-05	4.46847e-05
2.3	3	-1	0.0014639	0.0145366	9.78e-06	1.51e-05	0.0043005	0.00494924	1.50823e-05	3.58856e-05
1.5	3	0	0.00175452	0.0111895	1.13e-05	1.22e-05	0.00397569	0.00413722	9.6917e-06	4.13976e-05
1.7	3	0	0.00160369	0.0131013	1.07e-05	1.29e-05	0.00409261	0.00442952	1.2899e-05	4.09656e-05
2.3	3	0	0.00132876	0.0173764	9.21e-06	2.09e-05	0.00442483	0.00553108	2.09092e-05	3.7348e-05
1.5	3	1	0.00154759	0.0136002	1.07e-05	1.39e-05	0.00409985	0.00444761	1.3875e-05	3.95779e-05
1.7	3	1	0.00142699	0.0151212	1.02e-05	1.67e-05	0.00421277	0.00481324	1.6676e-05	3.87639e-05
2.3	3	1	0.00116783	0.0178556	8.54e-06	2.13e-05	0.00457287	0.00568362	2.13107e-05	3.6273e-05
2.5	3	1	0.0011179	0.0184412	8.03e-06	2.21e-05	0.0046841	0.00590824	2.2144e-05	3.56964e-05
1.5	3	2	0.0014123	0.0152186	1.03e-05	1.7e-05	0.00418102	0.00484422	1.70249e-05	3.78423e-05
1.7	3	2	0.00134317	0.0163668	9.92e-06	1.93e-05	0.00426976	0.00520972	1.92638e-05	3.73299e-05
1.9	3	2	0.00119825	0.0173349	9.2e-06	2.08e-05	0.00442717	0.00551787	2.07977e-05	3.66269e-05
2.3	3	2	0.00108234	0.0188026	8.18e-06	2.32e-05	0.00465152	0.00598504	2.31967e-05	3.60548e-05
1.5	3	3	0.00127219	0.0163808	9.94e-06	1.93e-05	0.00426508	0.00521415	1.93188e-05	3.72194e-05
1.7	3	3	0.00118098	0.0173048	9.42e-06	2.1e-05	0.00438005	0.00550827	2.09629e-05	3.6268e-05
2.3	3	3	0.00100783	0.0198683	7.87e-06	2.55e-05	0.00472007	0.00632427	2.5489e-05	3.70923e-05
2.5	3	3	0.000963797	0.0206458	7.33e-06	2.68e-05	0.0048382	0.00657175	2.6781e-05	3.76862e-05
2.9	3	3	0.000887132	0.0220233	6.22e-06	2.88e-05	0.00508237	0.00701022	2.8834e-05	3.86362e-05
1.5	3	4	0.00118501	0.0171195	9.7e-06	2.08e-05	0.00431739	0.00544931	2.08318e-05	3.62304e-05
1.7	3	4	0.00111029	0.017958	9.2e-06	2.23e-05	0.00442812	0.0057162	2.23145e-05	3.5732e-05
2.3	3	4	0.000944486	0.0206874	7.6e-06	2.73e-05	0.00477835	0.00658499	2.72626e-05	3.78701e-05
2.5	3	4	0.000898406	0.021472	7.03e-06	2.85e-05	0.00490359	0.00683476	2.85373e-05	3.85255e-05
2.9	3	4	0.00082403	0.0227179	5.88e-06	3.02e-05	0.00515556	0.00723133	3.01858e-05	3.91413e-05
1.5	3	5	0.00141654	0.0172431	1.03e-05	2.19e-05	0.00417848	0.00548864	2.18696e-05	3.4806e-05
1.7	3	5	0.00104702	0.0188232	9e-06	2.43e-05	0.00447115	0.00599161	2.42642e-05	3.65884e-05
1.9	3	5	0.000988655	0.0197354	8.48e-06	2.6e-05	0.00458646	0.00628198	2.59504e-05	3.72364e-05
2.1	3	5	0.00093294	0.020632	7.92e-06	2.76e-05	0.00470889	0.00656737	2.75579e-05	3.80271e-05
2.3	3	5	0.000886581	0.0213694	7.36e-06	2.87e-05	0.00483162	0.0068021	2.87348e-05	3.8513e-05
1.5	3	6	0.00106221	0.0184546	9.37e-06	2.38e-05	0.00439108	0.0058743	2.37778e-05	3.63793e-05
1.7	3	6	0.000992565	0.0195112	8.83e-06	2.58e-05	0.00450818	0.00621059	2.58403e-05	3.72455e-05
1.9	3	6	0.000933308	0.0204167	8.29e-06	2.75e-05	0.00462853	0.00649883	2.74986e-05	3.79666e-05
2.3	3	6	0.000833842	0.0219181	7.14e-06	2.99e-05	0.00488014	0.00697674	2.98948e-05	3.89465e-05
2.5	3	6	0.000789824	0.0225786	6.54e-06	3.08e-05	0.00501218	0.00718698	3.07874e-05	3.92855e-05
1.5	3	7	0.00101156	0.0190852	9.23e-06	2.52e-05	0.00442146	0.00607502	2.52444e-05	3.69675e-05
1.7	3	7	0.000945275	0.0200589	8.69e-06	2.71e-05	0.00454033	0.00638496	2.71031e-05	3.77261e-05
1.9	3	7	0.00088399	0.0209612	8.11e-06	2.87e-05	0.00466601	0.00667217	2.8731e-05	3.84789e-05
2.1	3	7	0.000830849	0.0217318	7.53e-06	3e-05	0.00479465	0.00691743	2.99717e-05	3.89991e-05
2.3	3	7	0.000782778	0.0224148	6.92e-06	3.09e-05	0.00492712	0.00713485	3.0932e-05	3.93551e-05
1.3	3	8	0.00104577	0.0184832	9.65e-06	2.42e-05	0.00432988	0.00588339	2.42089e-05	3.6519e-05
1.5	3	8	0.000964855	0.0196455	9.1e-06	2.66e-05	0.00444949	0.00625335	2.65683e-05	3.75441e-05
1.7	3	8	0.000896982	0.0206116	8.54e-06	2.84e-05	0.00457317	0.00656087	2.83949e-05	3.83408e-05
1.9	3	8	0.000836812	0.0214508	7.95e-06	2.98e-05	0.00470186	0.00682799	2.98374e-05	3.89558e-05
2.3	3	8	0.000737672	0.0227772	6.74e-06	3.16e-05	0.00496862	0.00725021	3.16411e-05	3.9513e-05
2.5	3	8	0.000688158	0.023473	6.07e-06	3.25e-05	0.00511384	0.00747168	3.25258e-05	3.99323e-05
2.7	3	8	0.00064491	0.02406	5.41e-06	3.31e-05	0.00526022	0.00765853	3.30858e-05	4.00899e-05
1.5	3	9	0.000921369	0.0201381	8.98e-06	2.77e-05	0.00447558	0.00641016	2.77432e-05	3.80587e-05
1.7	3	9	0.000854892	0.0210376	8.41e-06	2.94e-05	0.00460179	0.00669646	2.93811e-05	3.87233e-05
1.9	3	9	0.000795699	0.0218142	7.81e-06	3.06e-05	0.00473311	0.00694368	3.06333e-05	3.91955e-05
2.1	3	9	0.000740729	0.022522	7.18e-06	3.16e-05	0.00487035	0.00716899	3.16359e-05	3.95594e-05
2.3	3	9	0.000690949	0.0231619	6.54e-06	3.24e-05	0.00501161	0.00737267	3.2403e-05	3.98059e-05
1.5	3	10	0.000884457	0.0204973	8.88e-06	2.86e-05	0.00449773	0.00652449	2.85896e-05	3.83061e-05
1.7	3	10	0.000815302	0.0214011	8.28e-06	3.02e-05	0.00462872	0.00681218	3.02129e-05	3.90178e-05
1.9	3	10	0.000757078	0.022109	7.67e-06	3.13e-05	0.00476246	0.00703752	3.12532e-05	3.9319e-05
2.3	3	10	0.000646695	0.0234873	6.35e-06	3.3e-05	0.00505232	0.00747625	3.30164e-05	4.00096e-05
2.5	3	10	0.000599754	0.0240635	5.67e-06	3.35e-05	0.00520225	0.00765966	3.352e-05	4.01096e-05
2.3	4	-2	0.00184962	0.0103032	1.14e-05	1.21e-05	0.00394563	0.00406208	8.28064e-06	4.21769e-05
1.7	4	-1	0.00189122	0.00934186	1.16e-05	1.19e-05	0.00389709	0.00394072	6.89282e-06	4.28638e-05
1.9	4	-1	0.00178591	0.0110556	1.12e-05	1.23e-05	0.00398055	0.00414937	9.44955e-06	4.33063e-05
2.3	4	-1	0.00154305	0.0140477	1.01e-05	1.43e-05	0.00422767	0.00476718	1.43394e-05	4.16286e-05
1.5	4	0	0.00179983	0.0105917	1.14e-05	1.21e-05	0.0039485	0.00406925	8.74434e-06	4.16431e-05
1.7	4	0	0.00165681	0.0125371	1.09e-05	1.26e-05	0.00405649	0.00433922	1.192e-05	4.18046e-05
2.3	4	0	0.00134314	0.0169117	9.27e-06	1.99e-05	0.00441159	0.00538318	1.98693e-05	3.70067e-05
1.5	4	1	0.00158284	0.0132154	1.08e-05	1.32e-05	0.0040787	0.00439474	1.31708e-05	3.9982e-05
1.7	4	1	0.00145305	0.0148127	1.03e-05	1.61e-05	0.00419504	0.00471503	1.60729e-05	3.91574e-05
2.3	4	1	0.00129754	0.0192521	9.08e-06	2.55e-05	0.00445354	0.00612813	2.54901e-05	3.92291e-05
1.5	4	2	0.00143055	0.0149924	1.04e-05	1.66e-05	0.00417007	0.00477223	1.65677e-05	3.81411e-05
1.7	4	2	0.00134989	0.0162034	9.94e-06	1.89e-05	0.00426519	0.0051577	1.89022e-05	3.74323e-05
1.9	4	2	0.00121155	0.0171918	9.25e-06	2.05e-05	0.00441706	0.00547231	2.05056e-05	3.67162e-05
2.3	4	2	0.0010943	0.0186313	8.23e-06	2.28e-05	0.00464052	0.00593054	2.28351e-05	3.59326e-05
1.5	4	3	0.00135475	0.0161238	1.02e-05	1.89e-05	0.00421555	0.00513237	1.89476e-05	3.67303e-05
1.7	4	3	0.00119398	0.0171979	9.46e-06	2.07e-05	0.00437122	0.00547426	2.07492e-05	3.6424e-05
2.3	4	3	0.00101951	0.0196991	7.92e-06	2.51e-05	0.00470933	0.00627042	2.51196e-05	3.68891e-05
2.5	4	3	0.000975639	0.0204782	7.38e-06	2.64e-05	0.00482636	0.0065184	2.64198e-05	3.74758e-05
2.9	4	3	0.000895903	0.0219233	6.26e-06	2.86e-05	0.00507219	0.00697839	2.86378e-05	3.85755e-05
1.5	4	4	0.00119805	0.0170351	9.74e-06	2.07e-05	0.00430957	0.00542245	2.06664e-05	3.64385e-05
1.7	4	4	0.00111841	0.0178508	9.22e-06	2.21e-05	0.0044226	0.00568208	2.20783e-05	3.56682e-05
2.1	4	4	0.0010003	0.0197866	8.18e-06	2.57e-05	0.00465231	0.00629825	2.56834e-05	3.71795e-05
2.3	4	4	0.000952549	0.0205901	7.64e-06	2.71e-05	0.00477093	0.00655404	2.70533e-05	3.77877e-05
2.5	4	4	0.000906819	0.021374	7.07e-06	2.83e-05	0.00489518	0.00680357	2.83317e-05	3.84399e-05
2.9	4	4	0.000829316	0.0226948	5.91e-06	3.02e-05	0.00514943	0.00722398	3.01655e-05	3.92361e-05
1.5	4	5	0.00140456	0.0172073	1.03e-05	2.17e-05	0.00418566	0.00547727	2.17402e-05	3.48982e-05
1.7	4	5	0.00105482	0.0187179	9.03e-06	2.4e-05	0.00446584	0.00595808	2.4024e-05	3.64761e-05
1.9	4	5	0.000996446	0.0196331	8.5e-06	2.57e-05	0.00458054	0.00624941	2.5718e-05	3.71172e-05
2.3	4	5	0.000891135	0.021341	7.38e-06	2.87e-05	0.00482744	0.00679306	2.86861e-05	3.85699e-05
2.5	4	5	0.000850245	0.0219839	6.81e-06	2.96e-05	0.00495176	0.0069977	2.95883e-05	3.88721e-05
1.5	4	6	0.00107003	0.0183455	9.39e-06	2.35e-05	0.00438638	0.00583954	2.3524e-05	3.62339e-05
1.7	4	6	0.00100029	0.0194053	8.86e-06	2.56e-05	0.00450292	0.0061769	2.55928e-05	3.70933e-05
1.9	4	6	0.000941206	0.0203113	8.31e-06	2.73e-05	0.00462252	0.00646529	2.7254e-05	3.78093e-05
2.1	4	6	0.000887316	0.0211424	7.74e-06	2.87e-05	0.00474721	0.00672984	2.86814e-05	3.84681e-05
2.3	4	6	0.000838595	0.0218846	7.16e-06	2.98e-05	0.00487577	0.00696607	2.98333e-05	3.89694e-05
2.5	4	6	0.000794885	0.0225445	6.56e-06	3.07e-05	0.00500712	0.00717613	3.07295e-05	3.9307e-05
1.5	4	7	0.00101925	0.0189828	9.25e-06	2.5e-05	0.00441685	0.00604242	2.5002e-05	3.68154e-05
1.7	4	7	0.000949333	0.0200214	8.7e-06	2.7e-05	0.00453757	0.00637302	2.70196e-05	3.7727e-05
1.9	4	7	0.000888299	0.0209241	8.13e-06	2.87e-05	0.00466273	0.00666034	2.86512e-05	3.84768e-05
2.1	4	7	0.000835453	0.0216945	7.55e-06	2.99e-05	0.00479078	0.00690556	2.98956e-05	3.89954e-05
2.3	4	7	0.000787685	0.022377	6.94e-06	3.09e-05	0.00492261	0.00712283	3.08596e-05	3.93504e-05
1.3	4	8	0.0010497	0.0184399	9.66e-06	2.41e-05	0.00432784	0.00586962	2.41077e-05	3.65041e-05
1.5	4	8	0.000972517	0.019535	9.12e-06	2.63e-05	0.00444489	0.00621818	2.62994e-05	3.73398e-05
1.7	4	8	0.000901139	0.0205713	8.55e-06	2.83e-05	0.00457034	0.00654804	2.83029e-05	3.83173e-05
1.9	4	8	0.000845033	0.021339	7.98e-06	2.96e-05	0.00469562	0.0067924	2.95703e-05	3.87453e-05
2.3	4	8	0.000742694	0.0227357	6.76e-06	3.16e-05	0.004964	0.00723699	3.15588e-05	3.94851e-05
2.7	4	8	0.000650512	0.0240156	5.43e-06	3.3e-05	0.00525417	0.0076444	3.30076e-05	4.00585e-05
1.5	4	9	0.000925376	0.0200951	8.99e-06	2.76e-05	0.00447317	0.00639647	2.76407e-05	3.80181e-05
1.7	4	9	0.000859148	0.0209948	8.42e-06	2.93e-05	0.0045989	0.00668285	2.92818e-05	3.86804e-05
1.9	4	9	0.000800242	0.021764	7.82e-06	3.05e-05	0.00472966	0.0069277	3.05169e-05	3.91251e-05
2.1	4	9	0.000745561	0.0224783	7.2e-06	3.15e-05	0.00486629	0.00715505	3.15423e-05	3.95132e-05
2.3	4	9	0.00069607	0.0231169	6.56e-06	3.23e-05	0.0050069	0.00735834	3.23114e-05	3.9758e-05
2.5	4	9	0.000648093	0.0237474	5.89e-06	3.3e-05	0.00515391	0.00755905	3.29959e-05	4.00054e-05
1.5	4	10	0.000884825	0.0205213	8.88e-06	2.87e-05	0.0044975	0.00653212	2.86581e-05	3.8434e-05
1.7	4	10	0.000819649	0.0213561	8.3e-06	3.01e-05	0.00462576	0.00679787	3.01071e-05	3.89585e-05
1.9	4	10	0.000757844	0.022135	7.68e-06	3.13e-05	0.00476188	0.00704579	3.13309e-05	3.94448e-05
2.1	4	10	0.000704204	0.0227834	7.04e-06	3.21e-05	0.00490103	0.00725218	3.21482e-05	3.96617e-05
2.3	4	10	0.000651907	0.0234392	6.38e-06	3.29e-05	0.00504753	0.00746094	3.29167e-05	3.99454e-05
2.5	4	10	0.000605253	0.0240059	5.7e-06	3.34e-05	0.00519675	0.00764131	3.34e-05	4.00181e-05

## Sheet: (33,30.3)
																					whole potentials of the equilibrium droplet		the unit length energy barrier
0	0	0	0.001934	0	1.18e-05	1.18e-05	0.003868	0.003868	0	4.70027e-05		(0,0,0)	2.718	-252.2	2.053	3.274	-784	-170.4	165.1		2.741e-06		2.9e-06
0.2	0	0	0.00185743	0.00943794	1.17e-05	1.18e-05	0.00387413	0.00388331	7.07713e-06	4.53082e-05		(1,0,0)	-1.019	1005	21.98	51.92	2873	701	-371
0.4	0	0	0.00179776	0.0114353	1.17e-05	1.19e-05	0.0038898	0.0039225	1.03477e-05	4.41156e-05		(0,1,0)	-1.749	-4.415	-0.5021	-0.5696	-16.96	-8.446	1.073
0.8	0	0	0.00167841	0.0128948	1.14e-05	1.3e-05	0.00394979	0.00410456	1.29565e-05	4.21007e-05		(0,0,1)	-1.467	3.826	-0.2369	-0.001842	8.363	6.202	-0.4272
1.2	0	0	0.00155906	0.0145081	1.09e-05	1.6e-05	0.00404797	0.00461809	1.5997e-05	4.00345e-05		(2,0,0)	4.546	-1256	-41	-102.3	-3496	-880.9	394
1.6	0	0	0.00143972	0.0157109	1.03e-05	1.81e-05	0.00418434	0.00500092	1.81292e-05	3.80612e-05		(1,1,0)	2.701	10.56	1.299	1.976	27.71	19	-3.578
2	0	0	0.00120448	0.017189	9.09e-06	2.03e-05	0.00445162	0.00547142	2.0329e-05	3.69811e-05		(1,0,1)	2.603	-9.166	0.2836	-0.3756	-25.13	-13	2.152
2.1	0	0	0.00117429	0.0175774	8.84e-06	2.1e-05	0.00450616	0.00559505	2.09821e-05	3.67951e-05		(0,2,0)	0.02408	-0.05188	-0.005228	-0.01912	0.05129	-0.05437	0.01519
2.2	0	0	0.00114624	0.0179319	8.59e-06	2.16e-05	0.00456123	0.0057079	2.15526e-05	3.65861e-05		(0,1,1)	0.03449	0.1097	0.01165	0.01603	0.3873	0.1608	-0.0006376
2.3	0	0	0.00112005	0.0182575	8.34e-06	2.21e-05	0.00461684	0.00581156	2.20506e-05	3.63599e-05		(0,0,2)	0.02047	-0.03586	0.001953	-0.002965	-0.04856	-0.08528	-0.02115
2.4	0	0	0.00109546	0.0185589	8.08e-06	2.25e-05	0.004673	0.0059075	2.2486e-05	3.61224e-05		(3,0,0)	-1.333	664.8	29.04	71.7	1799	465.9	-184.5
2.5	0	0	0.00107442	0.0188468	7.83e-06	2.29e-05	0.00472758	0.00601696	2.28954e-05	3.59713e-05		(2,1,0)	-1.458	-8.825	-1.17	-2.011	-16.34	-14.44	3.328
2.6	0	0	0.00105444	0.0191185	7.58e-06	2.33e-05	0.00478274	0.00615485	2.32608e-05	3.5813e-05		(2,0,1)	-1.504	7.239	-0.06667	0.4834	21.31	8.876	-2.37
2.7	0	0	0.00103543	0.0194728	7.33e-06	2.38e-05	0.00483845	0.00629413	2.3823e-05	3.60069e-05		(1,2,0)	-0.02246	0.1132	0.01565	0.03928	0.0164	0.1152	-0.01819
2.8	0	0	0.0010192	0.0197826	7.08e-06	2.43e-05	0.00489258	0.00642945	2.42843e-05	3.61256e-05		(1,1,1)	-0.03936	-0.1665	-0.02009	-0.0316	-0.4293	-0.2373	0.01881
2.9	0	0	0.00100185	0.0201296	6.82e-06	2.48e-05	0.0049493	0.00657124	2.48213e-05	3.63532e-05		(1,0,2)	-0.02517	0.04599	-0.002372	0.004193	0.09418	0.1143	0.02363
3	0	0	0.000987031	0.0204199	6.57e-06	2.52e-05	0.00500436	0.00670891	2.52263e-05	3.6451e-05		(0,3,0)	-0.0001981	-0.0009689	-0.0001813	-0.0002978	-0.0003646	-0.0008272	-0.0001834
3.2	0	0	0.000957677	0.0210228	6.06e-06	2.61e-05	0.00511769	0.00699223	2.60677e-05	3.67452e-05		(0,2,1)	-0.000146	0.0009968	0.0001316	0.0003049	-0.001289	0.000824	-8.682e-05
3.4	0	0	0.000929685	0.0216121	5.53e-06	2.69e-05	0.00523387	0.00728267	2.68507e-05	3.70772e-05		(0,1,2)	-0.0002368	-0.0009028	-8.934e-05	-0.000139	-0.002607	-0.001077	-0.0001278
3.6	0	0	0.000903703	0.0221721	4.99e-06	2.75e-05	0.00535163	0.00757707	2.75429e-05	3.73911e-05		(0,0,3)	-8.844e-05	0.0002564	1.082e-06	3.275e-05	0.0003359	0.0004902	0.0001595
3.8	0	0	0.000878529	0.0227334	4.44e-06	2.82e-05	0.00547232	0.00787879	2.82117e-05	3.77445e-05		(4,0,0)	0.1462	-128.2	-6.98	-16.86	-336.8	-89.91	32.9
4	0	0	0.000855911	0.0232577	3.89e-06	2.88e-05	0.00559294	0.00818036	2.87798e-05	3.80573e-05		(3,1,0)	0.2948	2.613	0.367	0.6605	3.584	3.719	-0.9424
4.2	0	0	0.000834546	0.0237639	3.33e-06	2.93e-05	0.00571508	0.00848571	2.92851e-05	3.83497e-05		(3,0,1)	0.2706	-1.909	-0.02084	-0.1693	-5.542	-1.957	0.7391
2.3	0	-5	0.00190549	0.00925132	1.16e-05	1.19e-05	0.00389423	0.00393357	6.76484e-06	4.29064e-05		(2,2,0)	0.002819	-0.0641	-0.009576	-0.01996	-0.03578	-0.05706	0.005924
1.9	0	-4	0.00188494	0.00924849	1.16e-05	1.19e-05	0.00390529	0.00396122	6.74148e-06	3.54882e-05		(2,1,1)	0.01346	0.06369	0.008935	0.01431	0.1241	0.08876	-0.01168
2.3	0	-4	0.00175399	0.0115547	1.1e-05	1.25e-05	0.00403361	0.00428203	1.01837e-05	4.06503e-05		(2,0,2)	0.007424	-0.01327	0.0007397	-0.00129	-0.03747	-0.03685	-0.006375
1.7	0	-3	0.00188275	0.00945753	1.16e-05	1.19e-05	0.00390285	0.00395513	7.0541e-06	4.279e-05		(1,3,0)	0.0002142	0.001074	0.0001749	0.0002663	0.0005955	0.0006593	4.328e-05
1.9	0	-3	0.00171539	0.0136016	1.1e-05	1.41e-05	0.00403415	0.00432953	1.41096e-05	4.18522e-05		(1,2,1)	-7.45e-05	-0.0009761	-0.0001555	-0.0002684	0.0002157	-0.0008039	7.211e-05
2.3	0	-3	0.00153584	0.014124	1.01e-05	1.45e-05	0.00423431	0.00478378	1.44717e-05	4.15599e-05		(1,1,2)	0.0001479	0.0007259	7.887e-05	0.0001286	0.001514	0.0007919	1.867e-05
1.5	0	-2	0.00184712	0.00992467	1.15e-05	1.2e-05	0.00392013	0.00399832	7.73374e-06	4.18779e-05		(1,0,3)	5.548e-05	-0.0001638	-2.494e-07	-2.029e-05	-0.0002507	-0.0003336	-9.782e-05
1.7	0	-2	0.00170846	0.0119071	1.11e-05	1.24e-05	0.00402137	0.00425142	1.0848e-05	4.19913e-05		(0,4,0)	-1.536e-06	-4.005e-06	-5.571e-07	-3.466e-07	-9.066e-06	5.943e-07	2.377e-06
2.3	0	-2	0.00137289	0.0161508	9.4e-06	1.82e-05	0.00438422	0.00515855	1.82419e-05	3.62499e-05		(0,3,1)	3.226e-06	5.791e-06	1.203e-06	1.155e-06	7.621e-06	3.207e-06	-6.925e-07
1.5	0	-1	0.00167542	0.0122106	1.1e-05	1.25e-05	0.00402315	0.00425587	1.1403e-05	4.14859e-05		(0,2,2)	8.781e-08	-3.481e-06	-4.909e-07	-9.906e-07	4.549e-06	-2.241e-06	4.911e-07
1.7	0	-1	0.00151932	0.0140141	1.05e-05	1.45e-05	0.00414998	0.00457295	1.45487e-05	3.9966e-05		(0,1,3)	5.088e-07	1.883e-06	1.907e-07	3.389e-07	5.196e-06	2.307e-06	5.222e-07
2.3	0	-1	0.00130609	0.0183134	9.12e-06	2.31e-05	0.00444568	0.00582934	2.31087e-05	3.82695e-05		(0,0,4)	1.14e-07	-6.428e-07	-2.446e-08	-9.184e-08	-9.75e-07	-9.526e-07	-3.36e-07
2.5	0	-1	0.00117973	0.0179005	8.31e-06	2.12e-05	0.00462227	0.00575368	2.11694e-05	3.65154e-05
1.5	0	1	0.0014038	0.0153742	1.03e-05	1.74e-05	0.00418612	0.00489375	1.73528e-05	3.78239e-05
1.7	0	1	0.00133664	0.0164868	9.9e-06	1.95e-05	0.0042742	0.00524792	1.9526e-05	3.71576e-05
1.9	0	1	0.00118511	0.0174395	9.16e-06	2.1e-05	0.00443716	0.00555116	2.09988e-05	3.64638e-05
2.3	0	1	0.00107037	0.0189982	8.13e-06	2.36e-05	0.00466254	0.0060473	2.36207e-05	3.63287e-05
1.5	0	2	0.00134986	0.0162766	1.02e-05	1.93e-05	0.00421848	0.00518099	1.92943e-05	3.66511e-05
1.7	0	2	0.00118076	0.0173339	9.42e-06	2.1e-05	0.0043802	0.00551755	2.10328e-05	3.63575e-05
2.3	0	2	0.00100763	0.0198695	7.87e-06	2.55e-05	0.00472027	0.00632466	2.5491e-05	3.70756e-05
2.7	0	2	0.000922142	0.0213856	6.77e-06	2.79e-05	0.00496081	0.00680725	2.79423e-05	3.82389e-05
2.9	0	2	0.000882984	0.0220957	6.2e-06	2.9e-05	0.00508718	0.00703327	2.89927e-05	3.87808e-05
1.5	0	3	0.00118919	0.0170901	9.71e-06	2.08e-05	0.00431489	0.00543995	2.0773e-05	3.63084e-05
1.7	0	3	0.00111417	0.0179109	9.21e-06	2.22e-05	0.00442549	0.0057012	2.22117e-05	3.57145e-05
2.1	0	3	0.000996202	0.0198423	8.16e-06	2.58e-05	0.00465575	0.00631602	2.58076e-05	3.72343e-05
2.3	0	3	0.000948343	0.0206457	7.62e-06	2.72e-05	0.0047748	0.00657174	2.71753e-05	3.78463e-05
2.5	0	3	0.000902428	0.0214232	7.05e-06	2.84e-05	0.00489957	0.00681921	2.84336e-05	3.84754e-05
2.9	0	3	0.000824506	0.0227535	5.89e-06	3.03e-05	0.00515501	0.00724265	3.02841e-05	3.93001e-05
1.5	0	4	0.00140416	0.0172144	1.03e-05	2.18e-05	0.0041859	0.00547952	2.17568e-05	3.49277e-05
1.7	0	4	0.00105467	0.0187283	9.03e-06	2.41e-05	0.00446594	0.00596142	2.40503e-05	3.65183e-05
1.9	0	4	0.000996306	0.0196442	8.5e-06	2.57e-05	0.00458065	0.00625294	2.57464e-05	3.71601e-05
2.3	0	4	0.00089102	0.0213459	7.38e-06	2.87e-05	0.00482754	0.00679463	2.86986e-05	3.85882e-05
2.5	0	4	0.000850142	0.021989	6.81e-06	2.96e-05	0.00495186	0.0069993	2.96012e-05	3.88905e-05
1.5	0	5	0.00107381	0.0183039	9.4e-06	2.34e-05	0.00438411	0.0058263	2.34303e-05	3.62244e-05
1.7	0	5	0.00100403	0.0193665	8.87e-06	2.55e-05	0.00450038	0.00616456	2.55061e-05	3.70807e-05
1.9	0	5	0.000945056	0.0202736	8.33e-06	2.72e-05	0.0046196	0.00645327	2.71715e-05	3.77942e-05
2.3	0	5	0.000842857	0.0218396	7.18e-06	2.97e-05	0.00487185	0.00695175	2.97374e-05	3.89269e-05
2.5	0	5	0.00079937	0.0224987	6.58e-06	3.06e-05	0.00500263	0.00716156	3.06358e-05	3.92643e-05
1.5	0	6	0.00102307	0.0189531	9.26e-06	2.49e-05	0.00441456	0.00603297	2.49377e-05	3.68745e-05
1.7	0	6	0.000957021	0.0199306	8.72e-06	2.68e-05	0.00453235	0.00634411	2.68083e-05	3.76227e-05
1.9	0	6	0.000896316	0.0208335	8.16e-06	2.84e-05	0.00465664	0.00663152	2.84444e-05	3.83696e-05
2.3	0	6	0.000792666	0.022344	6.97e-06	3.08e-05	0.00491803	0.00711232	3.08007e-05	3.93736e-05
2.5	0	6	0.000750458	0.0229449	6.36e-06	3.15e-05	0.00505154	0.00730359	3.15145e-05	3.95624e-05
1.3	0	7	0.0010574	0.0183576	9.67e-06	2.39e-05	0.00432383	0.00584339	2.39161e-05	3.64822e-05
1.5	0	7	0.00098022	0.0194575	9.14e-06	2.61e-05	0.00444027	0.00619353	2.61203e-05	3.73092e-05
1.7	0	7	0.000909203	0.0204956	8.58e-06	2.81e-05	0.00456486	0.00652396	2.81317e-05	3.82813e-05
1.9	0	7	0.000849832	0.0213281	8e-06	2.96e-05	0.00469197	0.00678894	2.95653e-05	3.88657e-05
2.1	0	7	0.000798508	0.0220299	7.4e-06	3.06e-05	0.00482181	0.00701233	3.06074e-05	3.92114e-05
2.3	0	7	0.000748442	0.0227181	6.78e-06	3.15e-05	0.00495871	0.0072314	3.15478e-05	3.95764e-05
2.5	0	7	0.000703696	0.0233356	6.14e-06	3.23e-05	0.0050983	0.00742795	3.22577e-05	3.98044e-05
1.5	0	8	0.000937041	0.0199608	9.02e-06	2.73e-05	0.00446618	0.00635373	2.73184e-05	3.78525e-05
1.7	0	8	0.000867693	0.0209244	8.45e-06	2.91e-05	0.00459309	0.00666045	2.91258e-05	3.86691e-05
1.9	0	8	0.000809447	0.0216939	7.86e-06	3.04e-05	0.00472266	0.00690537	3.03699e-05	3.91108e-05
2.1	0	8	0.000755433	0.0224072	7.24e-06	3.14e-05	0.004858	0.00713242	3.14027e-05	3.94955e-05
2.3	0	8	0.000706606	0.0230366	6.61e-06	3.22e-05	0.0049972	0.00733276	3.21574e-05	3.9712e-05
2.5	0	8	0.000659291	0.0236643	5.94e-06	3.28e-05	0.00514271	0.00753257	3.28467e-05	3.99556e-05
1.5	0	9	0.000896871	0.0203973	8.92e-06	2.84e-05	0.00449028	0.00649267	2.83619e-05	3.83051e-05
1.7	0	9	0.000828734	0.0212956	8.33e-06	3e-05	0.00461958	0.0067786	2.99802e-05	3.89843e-05
1.9	0	9	0.000771566	0.022003	7.72e-06	3.1e-05	0.00475145	0.00700377	3.10333e-05	3.92804e-05
2.1	0	9	0.000714843	0.0227217	7.08e-06	3.2e-05	0.00489209	0.00723254	3.20396e-05	3.96801e-05
2.3	0	9	0.00066332	0.0233678	6.42e-06	3.28e-05	0.00503703	0.0074382	3.27935e-05	3.9935e-05
1.5	0	10	0.000859519	0.0207684	8.81e-06	2.92e-05	0.00451269	0.0066108	2.92463e-05	3.86546e-05
1.7	0	10	0.000792398	0.0216029	8.21e-06	3.07e-05	0.00464429	0.00687642	3.06729e-05	3.9192e-05
1.9	0	10	0.000732456	0.0223135	7.59e-06	3.17e-05	0.00478117	0.0071026	3.16963e-05	3.95027e-05
2.1	0	10	0.000676901	0.022974	6.94e-06	3.25e-05	0.00492396	0.00731286	3.25181e-05	3.97562e-05
2.3	0	10	0.000622684	0.0236372	6.25e-06	3.33e-05	0.00507441	0.00752396	3.32741e-05	4.00483e-05
2.5	0	10	0.000574131	0.0242207	5.55e-06	3.38e-05	0.00522787	0.00770968	3.37681e-05	4.01538e-05
2.7	0	10	0.000528262	0.0247789	4.83e-06	3.41e-05	0.0053862	0.00788735	3.41435e-05	4.01934e-05
2.3	1	-4	0.00192063	0.00856793	1.17e-05	1.18e-05	0.00388031	0.00389876	5.8232e-06	4.33746e-05
1.9	1	-3	0.0018842	0.00928995	1.16e-05	1.19e-05	0.00390584	0.00396261	6.80108e-06	3.54868e-05
2.3	1	-3	0.0017453	0.0116366	1.1e-05	1.25e-05	0.00404161	0.00430202	1.03077e-05	4.04594e-05
1.7	1	-2	0.00185395	0.00995374	1.15e-05	1.2e-05	0.00392243	0.00400408	7.77451e-06	4.27504e-05
1.9	1	-2	0.0016596	0.0150154	1.08e-05	1.7e-05	0.00407654	0.00477954	1.70121e-05	4.40476e-05
2.3	1	-2	0.00148149	0.0143787	9.85e-06	1.48e-05	0.00428431	0.00490878	1.4815e-05	3.63064e-05
1.5	1	-1	0.00179071	0.0107062	1.14e-05	1.21e-05	0.00395397	0.00408294	8.92204e-06	4.1612e-05
1.7	1	-1	0.00164837	0.0126349	1.09e-05	1.26e-05	0.00406223	0.00435357	1.20891e-05	4.17689e-05
2.3	1	-1	0.0013397	0.0170219	9.26e-06	2.01e-05	0.00441476	0.00541824	2.01136e-05	3.71649e-05
1.5	1	0	0.00159752	0.0130507	1.08e-05	1.29e-05	0.00406989	0.00437272	1.2873e-05	4.01616e-05
1.7	1	0	0.00146402	0.014681	1.03e-05	1.58e-05	0.00418759	0.0046731	1.58175e-05	3.93337e-05
2.3	1	0	0.00129673	0.0191341	9.08e-06	2.52e-05	0.00445429	0.00609056	2.5174e-05	3.91797e-05
2.5	1	0	0.00114624	0.0182356	8.16e-06	2.18e-05	0.00465576	0.00583739	2.17972e-05	3.61736e-05
1.5	1	1	0.00145035	0.0147499	1.04e-05	1.61e-05	0.00415819	0.00469503	1.60835e-05	3.84612e-05
1.7	1	1	0.00136133	0.0160252	9.98e-06	1.85e-05	0.00425742	0.00510097	1.85241e-05	3.77247e-05
2.3	1	1	0.00111013	0.0183989	8.3e-06	2.23e-05	0.00462596	0.00585654	2.23452e-05	3.57124e-05
2.5	1	1	0.00106194	0.0192769	7.78e-06	2.39e-05	0.00474006	0.00613604	2.3883e-05	3.6406e-05
1.5	1	2	0.00136958	0.015904	1.02e-05	1.85e-05	0.00420665	0.00506241	1.84752e-05	3.7222e-05
1.7	1	2	0.00132433	0.0168492	9.86e-06	2.04e-05	0.00428258	0.00536325	2.03518e-05	3.64512e-05
1.9	1	2	0.00114299	0.0177859	9.01e-06	2.17e-05	0.00446917	0.00566142	2.16739e-05	3.59434e-05
2.3	1	2	0.00103505	0.0194998	7.98e-06	2.47e-05	0.00469504	0.00620698	2.46961e-05	3.67748e-05
2.5	1	2	0.000991362	0.0202834	7.46e-06	2.6e-05	0.00481064	0.0064564	2.60136e-05	3.73502e-05
2.9	1	2	0.000912718	0.0217273	6.35e-06	2.83e-05	0.00505269	0.00691601	2.82512e-05	3.8436e-05
1.5	1	3	0.00122469	0.0168317	9.81e-06	2.03e-05	0.00429358	0.0053577	2.02549e-05	3.68093e-05
1.7	1	3	0.00113871	0.0176714	9.29e-06	2.17e-05	0.00440879	0.00562498	2.1709e-05	3.58573e-05
1.9	1	3	0.00107449	0.0186223	8.77e-06	2.35e-05	0.00452123	0.00592767	2.34664e-05	3.62716e-05
2.1	1	3	0.00101965	0.0195378	8.25e-06	2.51e-05	0.00463605	0.00621908	2.51376e-05	3.69672e-05
2.3	1	3	0.00168976	0.0210433	1.07e-05	3.33e-05	0.0040927	0.00669828	3.32772e-05	3.9821e-05
2.9	1	3	0.000851572	0.0224326	6.03e-06	2.96e-05	0.00512362	0.00714052	2.9642e-05	3.89684e-05
1.5	1	4	0.00115073	0.0174349	9.61e-06	2.15e-05	0.00433796	0.0055497	2.14982e-05	3.59739e-05
1.7	1	4	0.00107821	0.0184024	9.1e-06	2.33e-05	0.00444994	0.00585765	2.33098e-05	3.61545e-05
2.3	1	4	0.000911895	0.0211053	7.47e-06	2.82e-05	0.00480834	0.00671802	2.81795e-05	3.83625e-05
2.5	1	4	0.000868208	0.0218202	6.89e-06	2.93e-05	0.00493379	0.00694559	2.92684e-05	3.88444e-05
2.7	1	4	0.000830468	0.022428	6.32e-06	3.01e-05	0.00505981	0.00713905	3.00548e-05	3.90965e-05
2.9	1	4	0.000790975	0.0230874	5.71e-06	3.09e-05	0.00519391	0.00734895	3.09125e-05	3.94968e-05
1.5	1	5	0.00108972	0.0181099	9.44e-06	2.3e-05	0.00437457	0.00576457	2.29896e-05	3.61327e-05
1.7	1	5	0.00102342	0.0191127	8.93e-06	2.49e-05	0.0044872	0.00608376	2.49203e-05	3.67888e-05
1.9	1	5	0.000961076	0.0200953	8.38e-06	2.68e-05	0.00460742	0.00639653	2.67725e-05	3.76707e-05
2.1	1	5	0.000908154	0.0209192	7.82e-06	2.82e-05	0.00472971	0.00665879	2.81934e-05	3.82938e-05
2.3	1	5	0.000860572	0.0216594	7.25e-06	2.94e-05	0.00485555	0.00689439	2.93581e-05	3.87895e-05
2.7	1	5	0.000773724	0.0230099	6.04e-06	3.12e-05	0.0051211	0.00732429	3.12048e-05	3.95695e-05
1.5	1	6	0.00162126	0.0174637	1.09e-05	2.31e-05	0.00405565	0.00555887	2.31337e-05	3.40577e-05
1.7	1	6	0.000972752	0.0197423	8.77e-06	2.64e-05	0.00452165	0.00628419	2.63714e-05	3.74255e-05
1.9	1	6	0.000912717	0.0206457	8.21e-06	2.8e-05	0.00464418	0.00657174	2.80158e-05	3.81627e-05
2.3	1	6	0.000810888	0.0221518	7.04e-06	3.04e-05	0.00490126	0.00705115	3.0389e-05	3.91578e-05
2.5	1	6	0.000765646	0.0228171	6.43e-06	3.13e-05	0.00503635	0.00726292	3.12709e-05	3.95019e-05
1.3	1	7	0.00107309	0.0181527	9.71e-06	2.34e-05	0.00431567	0.00577817	2.34319e-05	3.62422e-05
1.5	1	7	0.000991989	0.0193301	9.18e-06	2.58e-05	0.00443321	0.00615295	2.5823e-05	3.7237e-05
1.7	1	7	0.000925178	0.0203003	8.62e-06	2.77e-05	0.004554	0.00646178	2.76692e-05	3.80135e-05
1.9	1	7	0.000866625	0.0211317	8.05e-06	2.91e-05	0.0046792	0.00672642	2.911e-05	3.85916e-05
2.3	1	7	0.000763143	0.0225898	6.84e-06	3.13e-05	0.00494519	0.00719055	3.12882e-05	3.94796e-05
2.5	1	7	0.00071921	0.0231963	6.22e-06	3.2e-05	0.00508279	0.00738363	3.19845e-05	3.96771e-05
1.5	1	8	0.000948919	0.019828	9.06e-06	2.7e-05	0.00445905	0.00631144	2.70021e-05	3.77203e-05
1.7	1	8	0.000880228	0.0207925	8.49e-06	2.88e-05	0.00458456	0.00661847	2.88178e-05	3.8529e-05
1.9	1	8	0.000822784	0.0215612	7.9e-06	3.01e-05	0.00471252	0.00686314	3.00705e-05	3.89659e-05
2.1	1	8	0.000769593	0.0222653	7.29e-06	3.11e-05	0.0048461	0.00708727	3.10911e-05	3.93209e-05
2.3	1	8	0.000717624	0.022966	6.65e-06	3.2e-05	0.00498707	0.00731029	3.20338e-05	3.97202e-05
1.5	1	9	0.00090892	0.0202592	8.95e-06	2.8e-05	0.00448305	0.00644869	2.80275e-05	3.8123e-05
1.7	1	9	0.00084153	0.0211506	8.37e-06	2.96e-05	0.00461088	0.00673244	2.9634e-05	3.87708e-05
1.9	1	9	0.000781326	0.0219277	7.76e-06	3.09e-05	0.00474403	0.00697981	3.08744e-05	3.92489e-05
2.3	1	9	0.000674544	0.0232886	6.47e-06	3.26e-05	0.0050267	0.00741298	3.26472e-05	3.98963e-05
1.5	1	10	0.000868051	0.0206944	8.84e-06	2.91e-05	0.00450757	0.00658725	2.90738e-05	3.86168e-05
1.7	1	10	0.000801637	0.0215223	8.24e-06	3.05e-05	0.00463801	0.00685076	3.04894e-05	3.91244e-05
1.9	1	10	0.000742415	0.0222391	7.62e-06	3.15e-05	0.00477361	0.00707891	3.15404e-05	3.9457e-05
2.1	1	10	0.000687583	0.0228975	6.98e-06	3.24e-05	0.00491499	0.00728849	3.23678e-05	3.97063e-05
2.3	1	10	0.000634088	0.0235502	6.3e-06	3.31e-05	0.00506392	0.00749625	3.31071e-05	3.99697e-05
2.5	1	10	0.000586251	0.0241298	5.61e-06	3.36e-05	0.00521575	0.00768075	3.36047e-05	4.00728e-05
2.7	1	10	0.000536778	0.0247637	4.87e-06	3.42e-05	0.005377	0.00788251	3.41695e-05	4.03022e-05
2.9	1	10	0.000494386	0.0252916	4.14e-06	3.44e-05	0.00553795	0.00805058	3.44327e-05	4.027e-05
2.3	2	-3	0.00190693	0.00927405	1.16e-05	1.19e-05	0.00389291	0.00393027	6.80044e-06	4.44716e-05
1.9	2	-2	0.00181555	0.0111002	1.13e-05	1.22e-05	0.00395802	0.00409305	9.58085e-06	3.80551e-05
2.3	2	-2	0.00163184	0.0127826	1.05e-05	1.3e-05	0.00414599	0.00456297	1.21161e-05	3.85929e-05
1.5	2	-1	0.0018851	0.00931232	1.16e-05	1.19e-05	0.00389734	0.00394136	6.84885e-06	4.20583e-05
1.7	2	-1	0.00176051	0.0112759	1.12e-05	1.23e-05	0.00398597	0.00416294	9.81621e-06	4.24042e-05
2.3	2	-1	0.00139947	0.0155284	9.51e-06	1.7e-05	0.00435977	0.00509741	1.69635e-05	3.56797e-05
1.5	2	0	0.00169206	0.0120286	1.11e-05	1.24e-05	0.00401316	0.00423091	1.10936e-05	4.16488e-05
1.7	2	0	0.00153251	0.01387	1.05e-05	1.43e-05	0.00414101	0.00455053	1.4283e-05	4.01358e-05
2.3	2	0	0.00130406	0.0183243	9.11e-06	2.31e-05	0.00444755	0.00583282	2.31259e-05	3.84636e-05
1.5	2	1	0.00149603	0.0141571	1.06e-05	1.49e-05	0.00413078	0.00452495	1.49185e-05	3.89307e-05
1.7	2	1	0.00139458	0.0155504	1.01e-05	1.75e-05	0.00423481	0.00494986	1.75403e-05	3.83207e-05
2.3	2	1	0.00114268	0.0181096	8.43e-06	2.18e-05	0.00459601	0.00576447	2.18016e-05	3.60695e-05
2.5	2	1	0.00109362	0.0187957	7.92e-06	2.29e-05	0.00470838	0.00598287	2.28736e-05	3.59536e-05
1.5	2	2	0.00139214	0.0155371	1.03e-05	1.77e-05	0.00419312	0.00494561	1.76918e-05	3.76251e-05
1.7	2	2	0.00125261	0.0167272	9.64e-06	1.98e-05	0.00433135	0.00532443	1.98203e-05	3.72397e-05
1.9	2	2	0.0011723	0.0175421	9.11e-06	2.12e-05	0.00444689	0.00558383	2.1197e-05	3.62931e-05
2.3	2	2	0.00141184	0.0207882	9.56e-06	3.05e-05	0.00434838	0.00661709	3.04857e-05	4.01929e-05
2.5	2	2	0.00101494	0.0199623	7.56e-06	2.53e-05	0.00478706	0.0063542	2.53341e-05	3.70714e-05
2.9	2	2	0.000937547	0.0214063	6.48e-06	2.76e-05	0.00502388	0.00681385	2.76007e-05	3.81325e-05
1.5	2	3	0.00134536	0.0164356	1.01e-05	1.97e-05	0.00422118	0.00523161	1.966e-05	3.64457e-05
1.7	2	3	0.00116372	0.0174767	9.36e-06	2.13e-05	0.00439179	0.00556301	2.13208e-05	3.61656e-05
2.3	2	3	0.000992016	0.0200897	7.8e-06	2.6e-05	0.00473463	0.00639476	2.59722e-05	3.73329e-05
2.5	2	3	0.000947633	0.020866	7.26e-06	2.73e-05	0.00485437	0.00664186	2.72542e-05	3.79381e-05
2.7	2	3	0.000909493	0.0215369	6.71e-06	2.83e-05	0.00497447	0.0068554	2.82515e-05	3.83542e-05
2.9	2	3	0.000869761	0.022242	6.13e-06	2.93e-05	0.00510252	0.00707983	2.92775e-05	3.88739e-05
1.5	2	4	0.00117183	0.0172683	9.67e-06	2.12e-05	0.0043253	0.00549667	2.11546e-05	3.62153e-05
1.7	2	4	0.00141052	0.0175539	1.01e-05	2.24e-05	0.00422397	0.00558757	2.2411e-05	3.51165e-05
2.1	2	4	0.000980464	0.0200383	8.1e-06	2.62e-05	0.00466897	0.0063784	2.62385e-05	3.73974e-05
2.3	2	4	0.00093213	0.0208407	7.55e-06	2.76e-05	0.00478972	0.00663381	2.75957e-05	3.80198e-05
2.9	2	4	0.000809905	0.0228793	5.81e-06	3.05e-05	0.00517195	0.0072827	3.05053e-05	3.93015e-05
1.5	2	5	0.00110571	0.0178956	9.49e-06	2.25e-05	0.00436497	0.00569634	2.2501e-05	3.59305e-05
1.7	2	5	0.00103518	0.0189805	8.97e-06	2.46e-05	0.0044792	0.00604169	2.4624e-05	3.67561e-05
1.9	2	5	0.00097678	0.0198959	8.44e-06	2.63e-05	0.00459549	0.00633305	2.63178e-05	3.74411e-05
2.1	2	5	0.000920691	0.0207926	7.87e-06	2.79e-05	0.00471918	0.00661848	2.79215e-05	3.82401e-05
2.3	2	5	0.000873805	0.0215247	7.31e-06	2.91e-05	0.00484338	0.00685152	2.90752e-05	3.8705e-05
2.5	2	5	0.000832007	0.0221781	6.73e-06	3e-05	0.00496999	0.0070595	2.99891e-05	3.90366e-05
2.7	2	5	0.000788454	0.0228774	6.11e-06	3.1e-05	0.00510519	0.0072821	3.09558e-05	3.95053e-05
1.5	2	6	0.00105416	0.0185541	9.35e-06	2.4e-05	0.0043959	0.00590594	2.40066e-05	3.64397e-05
1.7	2	6	0.00098454	0.0196062	8.81e-06	2.61e-05	0.00451363	0.00624085	2.60587e-05	3.73164e-05
1.9	2	6	0.000924979	0.0205108	8.26e-06	2.77e-05	0.00463486	0.00652879	2.77114e-05	3.80451e-05
2.1	2	6	0.000870303	0.0213364	7.68e-06	2.91e-05	0.00476151	0.00679159	2.91135e-05	3.86852e-05
2.3	2	6	0.000820696	0.0220885	7.08e-06	3.03e-05	0.00489224	0.00703098	3.02777e-05	3.92169e-05
2.5	2	6	0.00078002	0.0226766	6.49e-06	3.1e-05	0.00502198	0.00721819	3.09869e-05	3.93733e-05
1.5	2	7	0.00100362	0.0191863	9.21e-06	2.55e-05	0.00442622	0.00610718	2.54831e-05	3.70775e-05
1.7	2	7	0.000937141	0.0201584	8.66e-06	2.73e-05	0.00454586	0.00641663	2.73367e-05	3.78442e-05
1.9	2	7	0.000875438	0.0210611	8.08e-06	2.9e-05	0.00467251	0.00670396	2.89613e-05	3.86019e-05
2.3	2	7	0.000773233	0.0225105	6.88e-06	3.11e-05	0.00493591	0.00716531	3.11345e-05	3.94583e-05
2.5	2	7	0.000729913	0.0231151	6.26e-06	3.18e-05	0.00507209	0.00735775	3.18368e-05	3.96524e-05
1.3	2	8	0.00103782	0.0185899	9.63e-06	2.45e-05	0.00433401	0.00591736	2.44646e-05	3.66595e-05
1.5	2	8	0.000956901	0.0197496	9.08e-06	2.68e-05	0.00445426	0.00628648	2.68198e-05	3.76941e-05
1.7	2	8	0.000892418	0.0206452	8.52e-06	2.85e-05	0.00457628	0.00657158	2.84667e-05	3.83114e-05
1.9	2	8	0.000831847	0.0214842	7.93e-06	2.99e-05	0.00470564	0.00683864	2.99042e-05	3.89299e-05
2.1	2	8	0.000779276	0.0221874	7.33e-06	3.09e-05	0.00483797	0.00706246	3.09315e-05	3.92814e-05
2.3	2	8	0.000727937	0.0228863	6.69e-06	3.19e-05	0.00497758	0.00728494	3.18803e-05	3.96782e-05
2.5	2	8	0.000681965	0.0235012	6.05e-06	3.26e-05	0.00512004	0.00748068	3.25593e-05	3.9888e-05
1.5	2	9	0.000917031	0.0201764	8.97e-06	2.78e-05	0.00447818	0.00642235	2.78314e-05	3.80556e-05
1.7	2	9	0.000850193	0.0210684	8.39e-06	2.94e-05	0.00460499	0.00670627	2.9445e-05	3.86987e-05
1.9	2	9	0.0007906	0.021845	7.79e-06	3.07e-05	0.00473698	0.00695349	3.06922e-05	3.91737e-05
2.1	2	9	0.000735227	0.0225607	7.16e-06	3.17e-05	0.00487497	0.00718128	3.17109e-05	3.95657e-05
2.3	2	9	0.000685048	0.0231943	6.51e-06	3.25e-05	0.00501704	0.00738296	3.24538e-05	3.97885e-05
2.5	2	9	0.00063638	0.023828	5.84e-06	3.31e-05	0.00516562	0.00758468	3.3134e-05	4.00402e-05
1.5	2	10	0.000876313	0.0206078	8.86e-06	2.89e-05	0.00450261	0.00655966	2.8865e-05	3.85152e-05
1.7	2	10	0.000810485	0.0214355	8.27e-06	3.03e-05	0.00463199	0.00682313	3.02868e-05	3.90187e-05
1.9	2	10	0.00075187	0.022151	7.66e-06	3.13e-05	0.00476642	0.00705087	3.13431e-05	3.93478e-05
2.3	2	10	0.000640694	0.0235245	6.33e-06	3.31e-05	0.00505784	0.00748809	3.30801e-05	4.00177e-05
1.9	3	-2	0.00189489	0.00893304	1.16e-05	1.19e-05	0.00389772	0.0039423	6.30171e-06	3.51236e-05
2.3	3	-2	0.00177323	0.0113161	1.11e-05	1.24e-05	0.00401591	0.00423777	9.81152e-06	4.09524e-05
1.7	3	-1	0.00184381	0.0101219	1.15e-05	1.2e-05	0.00392933	0.00402132	8.0252e-06	4.27645e-05
1.9	3	-1	0.00164082	0.0155103	1.07e-05	1.81e-05	0.00409082	0.00493707	1.80869e-05	4.4756e-05
2.3	3	-1	0.00146368	0.0145443	9.78e-06	1.51e-05	0.0043007	0.00494974	1.50974e-05	3.59216e-05
1.5	3	0	0.00175426	0.0111953	1.13e-05	1.22e-05	0.00397585	0.00413761	9.70141e-06	4.14391e-05
1.7	3	0	0.00160346	0.0131081	1.07e-05	1.29e-05	0.00409277	0.00442993	1.29119e-05	4.10065e-05
2.3	3	0	0.00132856	0.0173915	9.21e-06	2.09e-05	0.00442501	0.00553589	2.09447e-05	3.74115e-05
1.5	3	1	0.00154736	0.0136073	1.07e-05	1.39e-05	0.00409998	0.00444796	1.38889e-05	3.96175e-05
1.7	3	1	0.00142677	0.0151291	1.02e-05	1.67e-05	0.00421291	0.00481573	1.66927e-05	3.88027e-05
2.3	3	1	0.00116766	0.0178649	8.54e-06	2.13e-05	0.00457303	0.00568657	2.1332e-05	3.63094e-05
2.5	3	1	0.00111774	0.0184508	8.03e-06	2.22e-05	0.00468426	0.00590865	2.21661e-05	3.57321e-05
1.5	3	2	0.00141209	0.0152264	1.03e-05	1.7e-05	0.00418115	0.00484671	1.70419e-05	3.78801e-05
1.7	3	2	0.00134297	0.0163753	9.92e-06	1.93e-05	0.0042699	0.00521242	1.92831e-05	3.73672e-05
1.9	3	2	0.00119808	0.0173438	9.2e-06	2.08e-05	0.0044273	0.00552072	2.08185e-05	3.66635e-05
2.3	3	2	0.00108218	0.0188123	8.18e-06	2.32e-05	0.00465167	0.00598814	2.32199e-05	3.60908e-05
1.5	3	3	0.00127201	0.0163892	9.94e-06	1.93e-05	0.0042652	0.00521683	1.93381e-05	3.72566e-05
1.7	3	3	0.00118081	0.0173136	9.42e-06	2.1e-05	0.00438017	0.0055111	2.09838e-05	3.63042e-05
2.3	3	3	0.00100768	0.0198785	7.87e-06	2.55e-05	0.00472021	0.00632754	2.55145e-05	3.71293e-05
2.5	3	3	0.000963655	0.0206564	7.33e-06	2.68e-05	0.00483834	0.00657513	2.68077e-05	3.77238e-05
2.9	3	3	0.000887001	0.0220273	6.22e-06	2.88e-05	0.00508252	0.00701151	2.88436e-05	3.8649e-05
1.5	3	4	0.00118483	0.0171283	9.7e-06	2.09e-05	0.0043175	0.00545212	2.08527e-05	3.62666e-05
1.7	3	4	0.00111013	0.0179672	9.2e-06	2.23e-05	0.00442823	0.00571913	2.23368e-05	3.57677e-05
2.3	3	4	0.000944346	0.020698	7.6e-06	2.73e-05	0.00477848	0.00658839	2.72899e-05	3.7908e-05
2.5	3	4	0.000898273	0.0214759	7.03e-06	2.85e-05	0.00490373	0.00683599	2.85467e-05	3.85382e-05
2.9	3	4	0.000823908	0.0227296	5.88e-06	3.02e-05	0.00515571	0.00723505	3.02159e-05	3.91805e-05
1.5	3	5	0.00141633	0.017252	1.03e-05	2.19e-05	0.0041786	0.00549148	2.18915e-05	3.48408e-05
1.7	3	5	0.00104686	0.0188262	9e-06	2.43e-05	0.00447125	0.00599256	2.42713e-05	3.6599e-05
1.9	3	5	0.000988509	0.0197456	8.48e-06	2.6e-05	0.00458657	0.00628521	2.59764e-05	3.72737e-05
2.1	3	5	0.000932802	0.0206426	7.92e-06	2.76e-05	0.00470901	0.00657075	2.75855e-05	3.80651e-05
2.3	3	5	0.00088645	0.0213733	7.36e-06	2.87e-05	0.00483175	0.00680332	2.87443e-05	3.85256e-05
1.5	3	6	0.00106205	0.0184641	9.37e-06	2.38e-05	0.00439117	0.0058773	2.38016e-05	3.64157e-05
1.7	3	6	0.000992418	0.0195212	8.83e-06	2.59e-05	0.00450828	0.00621378	2.58662e-05	3.72828e-05
1.9	3	6	0.00093317	0.0204271	8.28e-06	2.75e-05	0.00462863	0.00650216	2.75261e-05	3.80046e-05
2.3	3	6	0.000833718	0.021922	7.14e-06	2.99e-05	0.00488026	0.006978	2.99048e-05	3.89597e-05
2.5	3	6	0.000789707	0.0225828	6.54e-06	3.08e-05	0.00501229	0.00718832	3.0798e-05	3.92991e-05
1.5	3	7	0.00101141	0.019095	9.23e-06	2.53e-05	0.00442155	0.00607812	2.52696e-05	3.70045e-05
1.7	3	7	0.000945136	0.0200692	8.69e-06	2.71e-05	0.00454043	0.00638822	2.71302e-05	3.77639e-05
1.9	3	7	0.000883859	0.0209719	8.11e-06	2.88e-05	0.00466611	0.00667558	2.87597e-05	3.85174e-05
2.1	3	7	0.000830726	0.0217357	7.53e-06	3e-05	0.00479475	0.00691869	2.99819e-05	3.90124e-05
2.3	3	7	0.000782662	0.0224189	6.92e-06	3.09e-05	0.00492723	0.00713617	3.09427e-05	3.93688e-05
1.3	3	8	0.00104561	0.0184926	9.65e-06	2.42e-05	0.00432996	0.00588638	2.4233e-05	3.65555e-05
1.5	3	8	0.000964712	0.0196555	9.1e-06	2.66e-05	0.00444957	0.00625653	2.65948e-05	3.75817e-05
1.7	3	8	0.000896849	0.0206221	8.54e-06	2.84e-05	0.00457326	0.00656422	2.84233e-05	3.83791e-05
1.9	3	8	0.000836689	0.0214617	7.95e-06	2.99e-05	0.00470196	0.00683149	2.98673e-05	3.89948e-05
2.3	3	8	0.000737563	0.0227815	6.73e-06	3.17e-05	0.00496872	0.00725156	3.16522e-05	3.95269e-05
2.5	3	8	0.000688057	0.0234699	6.07e-06	3.25e-05	0.00511394	0.00747069	3.25165e-05	3.99208e-05
2.7	3	8	0.000644815	0.0240646	5.41e-06	3.31e-05	0.00526032	0.00766	3.30978e-05	4.01044e-05
1.5	3	9	0.000921233	0.0201484	8.98e-06	2.78e-05	0.00447566	0.00641344	2.7771e-05	3.80968e-05
1.7	3	9	0.000854765	0.0210412	8.41e-06	2.94e-05	0.00460188	0.00669764	2.93908e-05	3.87362e-05
1.9	3	9	0.000795582	0.0218182	7.81e-06	3.06e-05	0.0047332	0.00694495	3.06438e-05	3.9209e-05
2.1	3	9	0.000740619	0.0225262	7.18e-06	3.16e-05	0.00487044	0.00717032	3.1647e-05	3.95732e-05
2.3	3	9	0.000690847	0.0231663	6.54e-06	3.24e-05	0.0050117	0.00737406	3.24145e-05	3.982e-05
1.5	3	10	0.000884326	0.0205077	8.88e-06	2.86e-05	0.0044978	0.00652781	2.86182e-05	3.83444e-05
1.7	3	10	0.000815181	0.0214049	8.28e-06	3.02e-05	0.0046288	0.0068134	3.02232e-05	3.90311e-05
1.9	3	10	0.000756966	0.0221131	7.67e-06	3.13e-05	0.00476255	0.00703881	3.1264e-05	3.93326e-05
2.3	3	10	0.0006466	0.0234918	6.35e-06	3.3e-05	0.00505241	0.00747766	3.30282e-05	4.0024e-05
2.5	3	10	0.000599666	0.0240604	5.67e-06	3.35e-05	0.00520233	0.00765868	3.35107e-05	4.00985e-05
2.3	4	-2	0.00184934	0.0103087	1.14e-05	1.21e-05	0.00394588	0.00406271	8.28891e-06	4.2219e-05
1.7	4	-1	0.00189094	0.00934676	1.16e-05	1.19e-05	0.00389728	0.0039412	6.89971e-06	4.29066e-05
1.9	4	-1	0.00178565	0.0110614	1.12e-05	1.23e-05	0.00398075	0.00414987	9.45899e-06	4.33496e-05
2.3	4	-1	0.00154283	0.0140551	1.01e-05	1.44e-05	0.00422788	0.0047677	1.43537e-05	4.16702e-05
1.5	4	0	0.00179956	0.0105972	1.14e-05	1.21e-05	0.00394866	0.00406966	8.7531e-06	4.16848e-05
1.7	4	0	0.00165657	0.0125436	1.09e-05	1.26e-05	0.00405665	0.00433963	1.19319e-05	4.18464e-05
2.3	4	0	0.00134294	0.0169266	9.27e-06	1.99e-05	0.00441177	0.0053879	1.99033e-05	3.707e-05
1.5	4	1	0.0015826	0.0132222	1.08e-05	1.32e-05	0.00407884	0.00439509	1.31839e-05	4.00219e-05
1.7	4	1	0.00145284	0.0148204	1.03e-05	1.61e-05	0.00419519	0.00471748	1.6089e-05	3.91965e-05
2.3	4	1	0.00129735	0.0192621	9.08e-06	2.55e-05	0.00445372	0.00613133	2.55156e-05	3.92684e-05
1.5	4	2	0.00143034	0.0150002	1.04e-05	1.66e-05	0.0041702	0.0047747	1.65843e-05	3.81792e-05
1.7	4	2	0.00134969	0.0162118	9.94e-06	1.89e-05	0.00426533	0.00516038	1.89212e-05	3.74698e-05
1.9	4	2	0.00121137	0.0172006	9.25e-06	2.05e-05	0.0044172	0.00547513	2.05261e-05	3.67529e-05
2.3	4	2	0.00109414	0.018641	8.23e-06	2.29e-05	0.00464067	0.0059336	2.28579e-05	3.59685e-05
1.5	4	3	0.00135454	0.0161321	1.02e-05	1.9e-05	0.00421567	0.00513502	1.89666e-05	3.6767e-05
1.7	4	3	0.0011938	0.0172067	9.46e-06	2.08e-05	0.00437134	0.00547707	2.07699e-05	3.64604e-05
2.3	4	3	0.00101936	0.0197093	7.92e-06	2.51e-05	0.00470947	0.00627366	2.51447e-05	3.69259e-05
2.5	4	3	0.000975494	0.0204887	7.38e-06	2.64e-05	0.00482651	0.00652176	2.64462e-05	3.75133e-05
2.9	4	3	0.00089577	0.0219346	6.26e-06	2.87e-05	0.00507235	0.00698201	2.86665e-05	3.86141e-05
1.5	4	4	0.00119787	0.0170438	9.74e-06	2.07e-05	0.00430968	0.00542522	2.0687e-05	3.64749e-05
1.7	4	4	0.00111824	0.01786	9.22e-06	2.21e-05	0.00442272	0.005685	2.21004e-05	3.57039e-05
2.1	4	4	0.00100015	0.0197967	8.18e-06	2.57e-05	0.00465243	0.0063015	2.57091e-05	3.72167e-05
2.3	4	4	0.000952408	0.0206007	7.64e-06	2.71e-05	0.00477106	0.00655741	2.70803e-05	3.78255e-05
2.5	4	4	0.000906685	0.0213779	7.07e-06	2.83e-05	0.00489531	0.00680479	2.8341e-05	3.84526e-05
2.9	4	4	0.000829193	0.0226991	5.91e-06	3.02e-05	0.00514958	0.00722534	3.01759e-05	3.92496e-05
1.5	4	5	0.00140436	0.0172162	1.03e-05	2.18e-05	0.00418579	0.00548008	2.17619e-05	3.49331e-05
1.7	4	5	0.00105467	0.0187275	9.03e-06	2.4e-05	0.00446595	0.00596113	2.4048e-05	3.65126e-05
1.9	4	5	0.000996299	0.0196432	8.5e-06	2.57e-05	0.00458065	0.00625263	2.57438e-05	3.71544e-05
2.3	4	5	0.000891003	0.0213449	7.38e-06	2.87e-05	0.00482756	0.00679428	2.86956e-05	3.85827e-05
2.5	4	5	0.000850119	0.0219879	6.81e-06	2.96e-05	0.00495188	0.00699898	2.95983e-05	3.88852e-05
1.5	4	6	0.00106987	0.0183549	9.39e-06	2.35e-05	0.00438648	0.00584254	2.35476e-05	3.62702e-05
1.7	4	6	0.00100014	0.0194153	8.86e-06	2.56e-05	0.00450302	0.00618007	2.56184e-05	3.71304e-05
1.9	4	6	0.000941067	0.0203217	8.31e-06	2.73e-05	0.00462263	0.00646861	2.72813e-05	3.78471e-05
2.1	4	6	0.000887185	0.0211462	7.74e-06	2.87e-05	0.00474733	0.00673103	2.86908e-05	3.84808e-05
2.3	4	6	0.000838471	0.0218886	7.16e-06	2.98e-05	0.00487589	0.00696734	2.98434e-05	3.89825e-05
2.5	4	6	0.000794767	0.0225486	6.56e-06	3.07e-05	0.00500723	0.00717745	3.074e-05	3.93205e-05
1.5	4	7	0.0010191	0.0189858	9.25e-06	2.5e-05	0.00441694	0.00604338	2.50094e-05	3.68263e-05
1.7	4	7	0.000949192	0.0200317	8.7e-06	2.7e-05	0.00453767	0.00637628	2.70466e-05	3.77647e-05
1.9	4	7	0.000888168	0.0209348	8.13e-06	2.87e-05	0.00466283	0.00666374	2.86798e-05	3.85152e-05
2.1	4	7	0.000835329	0.0216984	7.55e-06	2.99e-05	0.00479088	0.00690682	2.99058e-05	3.90087e-05
2.3	4	7	0.000787569	0.0223812	6.94e-06	3.09e-05	0.00492272	0.00712414	3.08702e-05	3.93641e-05
1.3	4	8	0.00104954	0.0184493	9.65e-06	2.41e-05	0.00432792	0.00587261	2.41318e-05	3.65406e-05
1.5	4	8	0.000972373	0.019545	9.12e-06	2.63e-05	0.00444498	0.00622136	2.63257e-05	3.73772e-05
1.7	4	8	0.000901006	0.0205818	8.55e-06	2.83e-05	0.00457044	0.00655138	2.83312e-05	3.83557e-05
1.9	4	8	0.000844908	0.0213499	7.98e-06	2.96e-05	0.00469571	0.00679588	2.95999e-05	3.87841e-05
2.3	4	8	0.000742584	0.0227399	6.76e-06	3.16e-05	0.0049641	0.00723832	3.15697e-05	3.94988e-05
2.7	4	8	0.000650416	0.0240202	5.43e-06	3.3e-05	0.00525427	0.00764586	3.30194e-05	4.00729e-05
1.5	4	9	0.000925239	0.0201053	8.99e-06	2.77e-05	0.00447326	0.00639973	2.76683e-05	3.8056e-05
1.7	4	9	0.000859021	0.0209985	8.42e-06	2.93e-05	0.00459899	0.00668404	2.92916e-05	3.86932e-05
1.9	4	9	0.000800124	0.0217751	7.82e-06	3.05e-05	0.00472975	0.00693123	3.05474e-05	3.91642e-05
2.1	4	9	0.000745451	0.0224824	7.2e-06	3.16e-05	0.00486638	0.00715638	3.15533e-05	3.95269e-05
2.3	4	9	0.000695967	0.0231138	6.56e-06	3.23e-05	0.00500699	0.00735735	3.2302e-05	3.97465e-05
2.5	4	9	0.000647997	0.0237443	5.89e-06	3.3e-05	0.005154	0.00755806	3.29866e-05	3.99941e-05
1.5	4	10	0.000884694	0.0205317	8.88e-06	2.87e-05	0.00449758	0.00653544	2.86867e-05	3.84724e-05
1.7	4	10	0.000819528	0.02136	8.3e-06	3.01e-05	0.00462584	0.0067991	3.01174e-05	3.89717e-05
1.9	4	10	0.000757732	0.0221391	7.68e-06	3.13e-05	0.00476196	0.00704708	3.13418e-05	3.94585e-05
2.1	4	10	0.0007041	0.0227876	7.04e-06	3.22e-05	0.00490112	0.00725352	3.21595e-05	3.96757e-05
2.3	4	10	0.00065181	0.0234361	6.38e-06	3.29e-05	0.00504762	0.00745995	3.29073e-05	3.9934e-05
2.5	4	10	0.000605164	0.0240104	5.7e-06	3.34e-05	0.00519684	0.00764275	3.3412e-05	4.00325e-05

## Sheet: (32,25.4)
																					whole potentials of the equilibrium droplet		the unit length energy barrier
0	0	0	0.00182368	0	1.04e-05	1.04e-05	0.00364736	0.00364736	0	4.17933e-05		(0,0,0)	-1.399	-241.5	-6.962	-21.47	-352.2	-180.9	-11.49		2.493e-06		2.9e-06
0.2	0	0	0.00176403	0.00815717	1.04e-05	1.05e-05	0.00365452	0.00365929	5.28812e-06	4.09677e-05		(1,0,0)	-0.5066	813.5	38.5	86.8	1102	729.4	288.8
0.4	0	0	0.00175468	0.0105385	1.04e-05	1.05e-05	0.00366392	0.00367496	8.81112e-06	4.0276e-05		(0,1,0)	0.1138	-0.4366	-0.1825	-0.03567	-0.3476	0.3046	-0.4013
0.8	0	0	0.00169535	0.0122897	1.02e-05	1.19e-05	0.00370896	0.00394479	1.1885e-05	3.92388e-05		(0,0,1)	0.2112	6.712	-0.2336	0.2017	8.946	4.052	-0.2467
1.2	0	0	0.00157668	0.0142191	9.6e-06	1.56e-05	0.0038252	0.00463464	1.55786e-05	3.81477e-05		(2,0,0)	3.615	-881.8	-41.23	-96.76	-1155	-897.7	-466.2
1.6	0	0	0.00145801	0.0157167	8.77e-06	1.85e-05	0.0039984	0.00523603	1.84537e-05	3.71279e-05		(1,1,0)	-0.2257	-0.3396	0.4092	0.1297	-1.338	-0.893	0.5441
1.9	0	0	0.00133935	0.0162404	7.81e-06	1.9e-05	0.0041995	0.00554198	1.90207e-05	3.33799e-05		(1,0,1)	-0.3501	-13.04	0.3945	-0.3868	-17.84	-9.395	-1.382
2	0	0	0.0011771	0.0167767	6.74e-06	1.95e-05	0.00442326	0.0058706	1.95299e-05	3.29966e-05		(0,2,0)	0.001512	0.009307	-0.003741	-0.002871	0.01997	0.003262	0.002451
2.1	0	0	0.00114576	0.0170783	6.37e-06	2e-05	0.00450154	0.00602665	1.99706e-05	3.26646e-05		(0,1,1)	-0.001703	0.007456	0.002201	-0.0003911	0.006507	-0.004311	0.01317
2.2	0	0	0.00111738	0.0173509	6e-06	2.03e-05	0.00457968	0.00617343	2.03429e-05	3.23333e-05		(0,0,2)	-0.003698	-0.07083	0.005563	-0.0001229	-0.08527	-0.03305	0.01196
2.3	0	0	0.00109021	0.0177611	5.62e-06	2.1e-05	0.00465955	0.00637157	2.10321e-05	3.2629e-05		(3,0,0)	-0.4536	407.9	22.22	50.21	531.9	464	289.9
2.4	0	0	0.00106604	0.0181721	5.24e-06	2.17e-05	0.00473836	0.00657103	2.17293e-05	3.29693e-05		(2,1,0)	0.1846	0.8249	-0.3577	-0.1327	1.283	0.5082	-0.4203
2.5	0	0	0.00104152	0.0185819	4.85e-06	2.24e-05	0.00482061	0.00677399	2.2413e-05	3.33277e-05		(2,0,1)	0.1884	8.313	-0.2348	0.1987	11.42	6.873	2.183
2.6	0	0	0.00101716	0.0189526	4.44e-06	2.3e-05	0.00490553	0.00696603	2.29928e-05	3.3601e-05		(1,2,0)	0.0001018	-0.008485	-0.0002707	-0.000332	-0.00474	0.004999	0.004398
2.3	0	-10	0.000994917	0.0107223	4.99e-06	1.37e-05	0.00479105	0.00555352	7.49928e-06	4.0218e-05		(1,1,1)	0.001191	0.001765	-0.0009896	0.001488	0.007926	0.004943	-0.01539
2.3	0	-4	0.00176447	0.0129919	1.01e-05	1.32e-05	0.00372908	0.00418143	1.32334e-05	3.32138e-05		(1,0,2)	0.005383	0.07772	-0.01006	-0.003619	0.1021	0.04491	-0.00714
1.5	0	-2	0.00145388	0.0116617	8.86e-06	1.14e-05	0.00398018	0.00420206	1.01927e-05	3.81854e-05		(0,3,0)	-3.665e-05	6.227e-06	8.753e-05	6.536e-05	-0.0001471	-8.807e-05	-6.574e-05
1.7	0	-2	0.00165678	0.0130779	9.64e-06	1.32e-05	0.0038176	0.00425848	1.31964e-05	3.66694e-05		(0,2,1)	1.315e-05	-0.0001713	-3.076e-05	-2.305e-05	-0.000195	3.528e-05	1.767e-05
2.3	0	-2	0.00148242	0.017921	8.2e-06	2.35e-05	0.0041183	0.0060575	2.34916e-05	3.70432e-05		(0,1,2)	-3.621e-06	1.838e-05	2.23e-05	3.262e-05	-6.401e-07	-8.046e-07	-0.0001459
1.5	0	2	0.000944074	0.0169596	6.67e-06	1.99e-05	0.00443901	0.00594473	1.99044e-05	3.35523e-05		(0,0,3)	2.222e-05	0.0003888	-3.314e-05	1.374e-06	0.0003929	0.0001536	-7.106e-05
1.7	0	2	0.0011183	0.0179149	7.01e-06	2.25e-05	0.00436685	0.00623022	2.24855e-05	3.48321e-05		(4,0,0)	0.4495	-69.88	-5.421	-10.59	-93.98	-88.31	-61.99
1.9	0	2	0.0010365	0.0189742	6.16e-06	2.45e-05	0.00454475	0.00672635	2.4471e-05	3.57793e-05		(3,1,0)	-0.06672	-0.1435	0.1471	0.08809	-0.119	-0.02767	0.1006
2.3	0	2	0.000969384	0.0205928	4.82e-06	2.75e-05	0.00482629	0.00751122	2.75007e-05	3.73134e-05		(3,0,1)	-0.02633	-1.808	0.02673	-0.05047	-2.415	-1.617	-0.7688
2.5	0	2	0.000853096	0.0213979	3.5e-06	2.84e-05	0.00510324	0.00801091	2.83813e-05	3.76156e-05		(2,2,0)	0.0003075	-0.001242	-0.0008189	-0.0008603	-0.005998	-0.003739	-0.00135
2.7	0	2	0.000807707	0.0220825	2.59e-06	2.93e-05	0.00529324	0.00840764	2.93207e-05	3.8061e-05		(2,1,1)	-0.0003553	-0.004367	0.0002139	-0.0006086	-0.003608	1.681e-05	0.005173
2.9	0	2	0.000760204	0.0226909	1.61e-06	3e-05	0.00549781	0.00878992	2.99766e-05	3.82859e-05		(2,0,2)	-0.001845	-0.01821	0.004121	0.00258	-0.02877	-0.01372	-0.0003511
1.5	0	4	0.000718929	0.0188921	5.7e-06	2.39e-05	0.00464164	0.0067649	2.38674e-05	3.54798e-05		(1,3,0)	-1.495e-06	2.336e-05	3.509e-06	4.956e-06	8.271e-05	2.785e-05	-2.431e-06
1.7	0	4	0.00098805	0.0194779	6.38e-06	2.6e-05	0.0044997	0.00687208	2.59848e-05	3.65226e-05		(1,2,1)	-5.395e-06	0.0001027	1.535e-05	1.391e-05	1.962e-05	-5.655e-05	-3.402e-05
1.9	0	4	0.000911548	0.0203796	5.48e-06	2.76e-05	0.00468719	0.00733147	2.75631e-05	3.72482e-05		(1,1,2)	4.723e-06	-3.866e-05	-1.899e-05	-2.379e-05	-1.627e-05	1.045e-05	9.13e-05
2.1	0	4	0.000845455	0.0211505	4.56e-06	2.88e-05	0.00487992	0.00775481	2.87554e-05	3.77352e-05		(1,0,3)	-1.663e-05	-0.0001987	3.143e-05	1.256e-05	-0.0002186	-8.717e-05	3.859e-05
2.3	0	4	0.000786647	0.0218417	3.62e-06	2.97e-05	0.00507847	0.00815864	2.96894e-05	3.80799e-05		(0,4,0)	1.945e-07	-1.817e-07	-4.635e-07	-3.549e-07	1.689e-07	2.363e-07	2.721e-07
2.5	0	4	0.000732919	0.0224617	2.64e-06	3.04e-05	0.0052835	0.00854482	3.03834e-05	3.8274e-05		(0,3,1)	-5.119e-09	1.998e-07	1.797e-08	2.394e-08	7.706e-07	2.644e-07	1.228e-07
2.7	0	4	0.000684274	0.0230509	1.64e-06	3.1e-05	0.0054932	0.00892596	3.09575e-05	3.84286e-05		(0,2,2)	-3.66e-08	4.503e-07	7.318e-08	4.387e-08	3.554e-07	-2.439e-07	-8.964e-08
2.9	0	4	0.000638362	0.0236819	6.01e-07	3.16e-05	0.00570981	0.00933146	3.15961e-05	3.8712e-05		(0,1,3)	4.362e-08	-2.234e-07	-1.298e-07	-1.337e-07	-1.624e-07	8.247e-08	4.686e-07
1.5	0	6	0.000590736	0.020153	5.15e-06	2.66e-05	0.00475701	0.00730086	2.66422e-05	3.67567e-05		(0,0,4)	-5.428e-08	-8.646e-07	7.912e-08	-7.035e-09	-6.915e-07	-3.584e-07	8.102e-08
1.7	0	6	0.000881216	0.0204843	5.86e-06	2.82e-05	0.00460867	0.00731023	2.82157e-05	3.73855e-05
1.9	0	6	0.000808181	0.0212659	4.92e-06	2.94e-05	0.00480503	0.00774064	2.94311e-05	3.78431e-05
2.1	0	6	0.000741676	0.0219907	3.94e-06	3.04e-05	0.00501068	0.00816314	3.04282e-05	3.82265e-05
2.3	0	6	0.000679267	0.0226453	2.91e-06	3.12e-05	0.00522665	0.00857195	3.11632e-05	3.84621e-05
2.5	0	6	0.000622628	0.0232328	1.85e-06	3.17e-05	0.00544894	0.00896344	3.16669e-05	3.85451e-05
2.7	0	6	0.000571702	0.023853	7.65e-07	3.22e-05	0.00567556	0.00937357	3.22238e-05	3.87534e-05
2.9	0	6	0.000519505	0.0244018	-3.86e-07	3.25e-05	0.00591663	0.00976858	3.25042e-05	3.87301e-05
1.3	0	8	0.000474774	0.0201272	5.42e-06	2.68e-05	0.00469951	0.00724971	2.68296e-05	3.68425e-05
1.5	0	8	0.000872083	0.0204136	6.36e-06	2.85e-05	0.0045038	0.00720535	2.85216e-05	3.7443e-05
1.7	0	8	0.000789504	0.0212509	5.41e-06	2.99e-05	0.00470222	0.00765653	2.98953e-05	3.79795e-05
1.9	0	8	0.000712123	0.0219901	4.4e-06	3.09e-05	0.00491454	0.00808939	3.09077e-05	3.83353e-05
2.1	0	8	0.000642042	0.0226158	3.34e-06	3.15e-05	0.00513622	0.00849213	3.15358e-05	3.84364e-05
2.3	0	8	0.000580897	0.023225	2.26e-06	3.21e-05	0.0053624	0.00889531	3.20797e-05	3.85524e-05
2.5	0	8	0.000521866	0.0238414	1.13e-06	3.26e-05	0.00560008	0.0093128	3.25705e-05	3.86893e-05
2.7	0	8	0.000464695	0.0243762	-6.27e-08	3.28e-05	0.00584892	0.00970867	3.2771e-05	3.85821e-05
2.9	0	8	0.000415644	0.0249379	-1.25e-06	3.3e-05	0.00609734	0.0101163	3.3038e-05	3.85867e-05
1.5	0	10	0.000365747	0.0217432	4.18e-06	3e-05	0.0049595	0.0080327	2.99961e-05	3.79635e-05
1.7	0	10	0.000703233	0.0217953	4.99e-06	3.1e-05	0.00479022	0.0079218	3.09905e-05	3.82232e-05
1.9	0	10	0.00062621	0.022487	3.93e-06	3.18e-05	0.00501248	0.00834877	3.1808e-05	3.84739e-05
2.1	0	10	0.000553024	0.0231378	2.8e-06	3.24e-05	0.00524839	0.00877513	3.24209e-05	3.86341e-05
2.3	0	10	0.000485037	0.0237217	1.63e-06	3.28e-05	0.00549469	0.00918683	3.27778e-05	3.8612e-05
2.5	0	10	0.000424143	0.0243023	4.25e-07	3.31e-05	0.00574667	0.0096035	3.30854e-05	3.86064e-05
2.7	0	10	0.000365673	0.0248611	-8.29e-07	3.33e-05	0.00600933	0.010021	3.32708e-05	3.85184e-05
2.9	0	10	0.000311622	0.0253951	-2.11e-06	3.34e-05	0.00627834	0.0104339	3.3353e-05	3.83625e-05
2.3	1	-4	0.000261765	0.0123776	1.57e-07	1.66e-05	0.0058028	0.00723976	8.50912e-06	3.95732e-05
1.5	1	-2	0.00179707	0.00949416	1.03e-05	1.05e-05	0.00367131	0.00368728	7.14174e-06	3.94411e-05
2.3	1	-2	0.0016793	0.0155636	9.5e-06	1.86e-05	0.0038466	0.00508693	1.85924e-05	3.46788e-05
1.5	1	0	0.00129535	0.0139781	8.18e-06	1.43e-05	0.00412286	0.00472731	1.42803e-05	3.49745e-05
1.7	1	0	0.00141418	0.0149237	8.45e-06	1.64e-05	0.00406505	0.00501237	1.64439e-05	3.3348e-05
2.3	1	0	0.00130639	0.0177731	7.04e-06	2.22e-05	0.00436122	0.00617709	2.21525e-05	3.46603e-05
2.5	1	0	0.00105028	0.0191212	4.91e-06	2.38e-05	0.00480746	0.00696162	2.37844e-05	3.55244e-05
1.5	1	2	0.000997716	0.0165258	6.9e-06	1.91e-05	0.00439073	0.00576227	1.90556e-05	3.30632e-05
1.7	1	2	0.00126983	0.0172494	7.75e-06	2.14e-05	0.00421228	0.005895	2.14099e-05	3.43472e-05
2.3	1	2	0.00107202	0.0200388	5.5e-06	2.67e-05	0.00468465	0.00720701	2.66602e-05	3.69079e-05
2.5	1	2	0.00088899	0.021054	3.75e-06	2.77e-05	0.00504939	0.00784345	2.77165e-05	3.73643e-05
2.7	1	2	0.00084171	0.0217367	2.85e-06	2.87e-05	0.00523815	0.00823636	2.86601e-05	3.77914e-05
2.9	1	2	0.000796177	0.0223314	1.91e-06	2.93e-05	0.00543522	0.00860581	2.93205e-05	3.79996e-05
1.5	1	4	0.000756726	0.0183232	5.86e-06	2.26e-05	0.00460762	0.0065383	2.25803e-05	3.37375e-05
1.7	1	4	0.00138948	0.0185695	8.33e-06	2.53e-05	0.00409024	0.00625575	2.5347e-05	3.62277e-05
1.9	1	4	0.000936534	0.0200964	5.62e-06	2.69e-05	0.00465871	0.00720871	2.69303e-05	3.69266e-05
2.1	1	4	0.000872271	0.020923	4.72e-06	2.83e-05	0.00484613	0.00764638	2.82968e-05	3.75747e-05
2.3	1	4	0.000811327	0.0216148	3.78e-06	2.92e-05	0.00504441	0.00804867	2.92363e-05	3.79038e-05
2.5	1	4	0.000759234	0.022289	2.83e-06	3.01e-05	0.00524403	0.00844998	3.01067e-05	3.82609e-05
2.7	1	4	0.000707926	0.0228805	1.82e-06	3.07e-05	0.00545488	0.0088319	3.06852e-05	3.8402e-05
2.9	1	4	0.000663375	0.023502	8.09e-07	3.13e-05	0.00566629	0.00922888	3.13273e-05	3.86733e-05
1.5	1	6	0.000617079	0.0199678	5.26e-06	2.63e-05	0.0047333	0.00721672	2.62581e-05	3.66249e-05
1.7	1	6	0.000898492	0.0203155	5.94e-06	2.78e-05	0.00459105	0.00723678	2.7835e-05	3.7234e-05
1.9	1	6	0.000827036	0.0211547	5.02e-06	2.92e-05	0.00478353	0.0076839	2.92278e-05	3.78559e-05
2.1	1	6	0.000757991	0.0218196	4.04e-06	3.01e-05	0.00499013	0.00808414	3.0057e-05	3.80477e-05
2.3	1	6	0.000701025	0.0225206	3.05e-06	3.1e-05	0.00519662	0.00850217	3.09693e-05	3.84484e-05
2.5	1	6	0.000641488	0.0231112	1.98e-06	3.15e-05	0.00542065	0.00889545	3.14759e-05	3.85197e-05
2.7	1	6	0.000591728	0.0237238	9.2e-07	3.2e-05	0.00564312	0.00929884	3.20357e-05	3.87194e-05
2.9	1	6	0.00054067	0.0242642	-2.1e-07	3.23e-05	0.0058798	0.00968666	3.23185e-05	3.86891e-05
1.3	1	8	0.000496981	0.0199296	5.51e-06	2.64e-05	0.00468219	0.00716595	2.63813e-05	3.65813e-05
1.5	1	8	0.00088893	0.0202897	6.43e-06	2.82e-05	0.00448864	0.00715006	2.8249e-05	3.73459e-05
1.7	1	8	0.000803899	0.0211298	5.48e-06	2.96e-05	0.00468754	0.00760161	2.9628e-05	3.78692e-05
1.9	1	8	0.000727823	0.0218645	4.48e-06	3.06e-05	0.00489664	0.00802945	3.06454e-05	3.82131e-05
2.1	1	8	0.000658968	0.0225459	3.44e-06	3.14e-05	0.0051149	0.0084496	3.1449e-05	3.84801e-05
2.3	1	8	0.000594741	0.0231594	2.35e-06	3.2e-05	0.0053433	0.00885576	3.19954e-05	3.85879e-05
2.5	1	8	0.000536729	0.0237699	1.23e-06	3.25e-05	0.00557779	0.0092682	3.24877e-05	3.87171e-05
2.7	1	8	0.000480526	0.0242987	5.97e-08	3.27e-05	0.00582327	0.00965893	3.26905e-05	3.86054e-05
2.9	1	8	0.000432332	0.0248544	-1.11e-06	3.3e-05	0.00606831	0.0100613	3.29599e-05	3.86067e-05
1.5	1	10	0.000383229	0.0216638	4.26e-06	2.99e-05	0.00494377	0.00799151	2.98542e-05	3.79463e-05
1.7	1	10	0.00071417	0.0217268	5.05e-06	3.09e-05	0.00477906	0.00788821	3.08528e-05	3.81947e-05
1.9	1	10	0.00063822	0.0224142	4e-06	3.17e-05	0.00499878	0.00831115	3.16728e-05	3.84358e-05
2.1	1	10	0.000566074	0.02306	2.88e-06	3.23e-05	0.00523194	0.00873301	3.22878e-05	3.85891e-05
2.3	1	10	0.000499066	0.0236385	1.72e-06	3.26e-05	0.00547533	0.00913998	3.26471e-05	3.85628e-05
2.5	1	10	0.000439039	0.0242135	5.32e-07	3.3e-05	0.00572432	0.00955178	3.2957e-05	3.85542e-05
2.7	1	10	0.000381374	0.0247667	-7.07e-07	3.31e-05	0.0059839	0.00996426	3.31451e-05	3.84648e-05
2.9	1	10	0.000328024	0.0252949	-1.98e-06	3.32e-05	0.0062498	0.0103722	3.32299e-05	3.8308e-05
1.7	2	-2	0.000278801	0.0108467	2.92e-06	1.5e-05	0.00522314	0.00627365	7.15363e-06	4.0125e-05
2.3	2	-2	0.00163272	0.013474	9.19e-06	1.38e-05	0.00391089	0.00444021	1.37757e-05	3.25353e-05
1.5	2	0	0.00141919	0.0130678	8.71e-06	1.27e-05	0.00401141	0.00436051	1.27282e-05	3.67809e-05
1.7	2	0	0.00149861	0.0142546	8.87e-06	1.52e-05	0.00397894	0.00473755	1.52324e-05	3.47558e-05
2.3	2	0	0.00136892	0.0193492	7.45e-06	2.66e-05	0.00427493	0.00666018	2.66487e-05	3.82386e-05
1.5	2	2	0.00123509	0.0155294	7.92e-06	1.75e-05	0.00417709	0.00528555	1.74597e-05	3.22855e-05
1.7	2	2	0.00119691	0.01689	7.4e-06	2.03e-05	0.00428666	0.00582142	2.02642e-05	3.3719e-05
2.3	2	2	0.00110774	0.0196754	5.73e-06	2.59e-05	0.00463536	0.00704086	2.59149e-05	3.65629e-05
2.5	2	2	0.000919389	0.0207605	3.97e-06	2.71e-05	0.0050038	0.00770153	2.71493e-05	3.71738e-05
2.7	2	2	0.000869878	0.0214438	3.07e-06	2.81e-05	0.00519252	0.00809271	2.80971e-05	3.75827e-05
2.9	2	2	0.000826009	0.022093	2.16e-06	2.89e-05	0.00538331	0.0084768	2.89332e-05	3.79533e-05
1.5	2	4	0.000783986	0.0182487	5.98e-06	2.25e-05	0.00458308	0.00649517	2.24897e-05	3.48417e-05
1.7	2	4	0.00103527	0.0189577	6.61e-06	2.48e-05	0.00445154	0.00665412	2.48177e-05	3.60052e-05
2.1	2	4	0.000957013	0.0205476	5.23e-06	2.78e-05	0.00473936	0.00743076	2.77771e-05	3.73104e-05
2.3	2	4	0.000834779	0.021431	3.93e-06	2.89e-05	0.00501204	0.00795638	2.88927e-05	3.78049e-05
2.5	2	4	0.000780059	0.0221073	2.97e-06	2.98e-05	0.00521279	0.00835807	2.97658e-05	3.81501e-05
2.7	2	4	0.000730049	0.0226906	1.99e-06	3.03e-05	0.00541904	0.00873238	3.03483e-05	3.828e-05
2.9	2	4	0.000686688	0.0233034	1e-06	3.1e-05	0.00562573	0.00912139	3.09937e-05	3.85413e-05
1.5	2	6	0.000641546	0.0190506	5.37e-06	2.4e-05	0.00471128	0.00687003	2.39888e-05	3.31326e-05
1.7	2	6	0.00168271	0.0188601	9.76e-06	2.76e-05	0.00379115	0.00612016	2.75765e-05	3.7175e-05
1.9	2	6	0.000841179	0.021034	5.1e-06	2.9e-05	0.00476741	0.00762789	2.89725e-05	3.77842e-05
2.1	2	6	0.000773371	0.0217569	4.13e-06	3e-05	0.00497075	0.00804626	2.99788e-05	3.81424e-05
2.3	2	6	0.000713396	0.0223998	3.13e-06	3.07e-05	0.00517955	0.00844376	3.0722e-05	3.83553e-05
2.5	2	6	0.000659066	0.0230368	2.11e-06	3.14e-05	0.00539428	0.00884713	3.14036e-05	3.85933e-05
2.7	2	6	0.000606015	0.0235918	1.03e-06	3.18e-05	0.00561998	0.00923002	3.17938e-05	3.86092e-05
2.9	2	6	0.00056023	0.024176	-4.77e-08	3.23e-05	0.00584576	0.00962662	3.22504e-05	3.87483e-05
1.3	2	8	0.000513003	0.0197888	5.57e-06	2.61e-05	0.00466969	0.00710631	2.60643e-05	3.64257e-05
1.5	2	8	0.000901542	0.0202191	6.49e-06	2.81e-05	0.00447728	0.00711654	2.81069e-05	3.73562e-05
1.7	2	8	0.00081377	0.021063	5.53e-06	2.95e-05	0.00467747	0.00756986	2.94905e-05	3.78681e-05
1.9	2	8	0.000738716	0.0217946	4.54e-06	3.05e-05	0.00488422	0.00799426	3.05119e-05	3.82015e-05
2.1	2	8	0.000670817	0.0224719	3.51e-06	3.13e-05	0.00509997	0.00841049	3.13183e-05	3.84592e-05
2.3	2	8	0.000607508	0.0230806	2.44e-06	3.19e-05	0.00532568	0.00881229	3.18667e-05	3.85599e-05
2.5	2	8	0.000550367	0.0236858	1.33e-06	3.24e-05	0.00555733	0.00922011	3.2361e-05	3.86829e-05
2.7	2	8	0.00049499	0.0242722	1.72e-07	3.27e-05	0.00579984	0.00963109	3.2736e-05	3.87421e-05
2.9	2	8	0.000443049	0.0247733	-1.02e-06	3.28e-05	0.00604966	0.010015	3.28368e-05	3.85655e-05
1.5	2	10	0.000399118	0.021574	4.33e-06	2.97e-05	0.00492947	0.0079476	2.96764e-05	3.78716e-05
1.7	2	10	0.000724501	0.0216465	5.1e-06	3.07e-05	0.00476852	0.00785086	3.06786e-05	3.81108e-05
1.9	2	10	0.000649467	0.0223301	4.06e-06	3.15e-05	0.00498596	0.00827002	3.1501e-05	3.8344e-05
2.1	2	10	0.000578208	0.0229711	2.96e-06	3.21e-05	0.00521665	0.00868764	3.21177e-05	3.84914e-05
2.3	2	10	0.00051204	0.0236065	1.81e-06	3.27e-05	0.00545742	0.00911405	3.26503e-05	3.86376e-05
2.5	2	10	0.000448327	0.0241891	5.99e-07	3.3e-05	0.00571039	0.00953175	3.29611e-05	3.86253e-05
2.7	2	10	0.000391278	0.0247389	-6.31e-07	3.32e-05	0.00596785	0.00994131	3.31508e-05	3.85338e-05
2.9	2	10	0.00033847	0.0252639	-1.89e-06	3.32e-05	0.00623163	0.0103463	3.32375e-05	3.83757e-05
1.9	3	-2	0.00028974	0.0116518	2.1e-06	1.55e-05	0.00539605	0.00656185	8.03154e-06	3.30668e-05
2.3	3	-2	0.0017975	0.0119784	1.03e-05	1.13e-05	0.00368349	0.00383168	1.1343e-05	3.54004e-05
1.5	3	0	0.00158231	0.0120821	9.41e-06	1.12e-05	0.00386459	0.00400941	1.11687e-05	3.74419e-05
1.7	3	0	0.0015938	0.0135504	9.33e-06	1.4e-05	0.00388184	0.00444897	1.40049e-05	3.59132e-05
2.3	3	0	0.00143517	0.0185003	7.89e-06	2.48e-05	0.00418351	0.00630142	2.47512e-05	3.75662e-05
1.5	3	2	0.00123117	0.0152807	7.9e-06	1.69e-05	0.00418062	0.00520304	1.68945e-05	3.2112e-05
1.7	3	2	0.00128787	0.016331	7.84e-06	1.93e-05	0.00419389	0.00556927	1.92523e-05	3.28634e-05
1.9	3	2	0.00125572	0.017521	7.36e-06	2.18e-05	0.00429484	0.00604449	2.17759e-05	3.45123e-05
2.1	3	2	0.00106112	0.0187895	5.86e-06	2.37e-05	0.00460818	0.00670506	2.37418e-05	3.55185e-05
2.3	3	2	0.000997927	0.0196668	5.01e-06	2.52e-05	0.0047869	0.00714583	2.52469e-05	3.62343e-05
2.5	3	2	0.000944711	0.0204437	4.15e-06	2.65e-05	0.00496581	0.0075571	2.64904e-05	3.68239e-05
1.5	3	4	0.000896506	0.017843	6.46e-06	2.19e-05	0.00448182	0.00628327	2.18721e-05	3.45031e-05
1.7	3	4	0.00105486	0.0186958	6.7e-06	2.42e-05	0.00443156	0.00654802	2.4219e-05	3.56483e-05
2.1	3	4	0.000976999	0.0204132	5.35e-06	2.75e-05	0.00471418	0.00736357	2.753e-05	3.7278e-05
2.3	3	4	0.000849187	0.0213058	4.03e-06	2.86e-05	0.00499216	0.00789527	2.86486e-05	3.77608e-05
2.5	3	4	0.000795536	0.0219764	3.09e-06	2.95e-05	0.00518958	0.00829151	2.95239e-05	3.80966e-05
2.7	3	4	0.000746544	0.0225536	2.12e-06	3.01e-05	0.00539232	0.00866011	3.01092e-05	3.82171e-05
2.9	3	4	0.000704102	0.0231598	1.15e-06	3.08e-05	0.00559543	0.00904318	3.07571e-05	3.84704e-05
1.5	3	6	0.000659853	0.0196179	5.45e-06	2.55e-05	0.0046948	0.00706288	2.55088e-05	3.62562e-05
1.7	3	6	0.000927637	0.020055	6.08e-06	2.73e-05	0.00456132	0.00712189	2.7262e-05	3.70144e-05
1.9	3	6	0.00085463	0.0208936	5.17e-06	2.87e-05	0.00475208	0.00756545	2.86598e-05	3.76142e-05
2.1	3	6	0.000787855	0.0216119	4.22e-06	2.97e-05	0.0049525	0.00797892	2.96688e-05	3.79643e-05
2.3	3	6	0.000728823	0.0223128	3.23e-06	3.06e-05	0.00515826	0.00839497	3.0588e-05	3.83468e-05
2.5	3	6	0.00067118	0.0229555	2.19e-06	3.13e-05	0.00537611	0.00880236	3.12719e-05	3.85771e-05
2.7	3	6	0.000618888	0.0235055	1.13e-06	3.17e-05	0.00559912	0.00918089	3.16639e-05	3.85868e-05
2.9	3	6	0.000573822	0.0240844	6.52e-08	3.21e-05	0.00582211	0.00957288	3.2122e-05	3.87207e-05
1.3	3	8	0.000527288	0.0196982	5.62e-06	2.59e-05	0.00465855	0.00706577	2.58744e-05	3.63669e-05
1.5	3	8	0.000909992	0.0201385	6.52e-06	2.79e-05	0.00446968	0.0070824	2.79194e-05	3.72859e-05
1.7	3	8	0.000823095	0.0209804	5.58e-06	2.93e-05	0.00466796	0.00753289	2.93062e-05	3.77895e-05
1.9	3	8	0.000748881	0.0217091	4.6e-06	3.03e-05	0.00487263	0.00795402	3.03306e-05	3.81149e-05
2.1	3	8	0.000681763	0.0223827	3.58e-06	3.11e-05	0.00508618	0.0083666	3.11395e-05	3.83655e-05
2.3	3	8	0.000619201	0.0230493	2.51e-06	3.19e-05	0.00530954	0.00878814	3.18619e-05	3.86375e-05
2.5	3	8	0.000558459	0.0235992	1.39e-06	3.22e-05	0.00554519	0.00917733	3.21856e-05	3.8579e-05
2.7	3	8	0.000508074	0.0241686	2.73e-07	3.26e-05	0.00577864	0.00957436	3.25626e-05	3.86354e-05
2.9	3	8	0.000456751	0.0247285	-9.07e-07	3.28e-05	0.00602582	0.00997952	3.28353e-05	3.86312e-05
1.5	3	10	0.00040883	0.0214798	4.37e-06	2.95e-05	0.00492072	0.00790633	2.946e-05	3.77336e-05
1.7	3	10	0.000734241	0.0216144	5.14e-06	3.06e-05	0.00475859	0.00783151	3.06382e-05	3.81444e-05
1.9	3	10	0.00065584	0.0223031	4.09e-06	3.15e-05	0.0049787	0.00825442	3.14622e-05	3.83712e-05
2.1	3	10	0.000585198	0.0229415	3e-06	3.21e-05	0.00520785	0.00866969	3.20801e-05	3.85134e-05
2.3	3	10	0.000519619	0.023574	1.86e-06	3.26e-05	0.00544696	0.00909357	3.26139e-05	3.86563e-05
2.5	3	10	0.000456444	0.0241536	6.57e-07	3.29e-05	0.00569821	0.00950865	3.29259e-05	3.86414e-05
2.7	3	10	0.00039989	0.0247002	-5.64e-07	3.31e-05	0.0059539	0.00991552	3.31169e-05	3.85484e-05
2.9	3	10	0.000347516	0.025222	-1.81e-06	3.32e-05	0.00621588	0.0103179	3.32047e-05	3.83891e-05
1.9	4	-2	0.00029918	0.00989908	2.15e-06	1.54e-05	0.00538529	0.00654391	5.80685e-06	3.20521e-05
1.5	4	0	0.00175069	0.0112393	1.01e-05	1.06e-05	0.00371305	0.00375684	9.9328e-06	3.83626e-05
1.7	4	0	0.00167337	0.0129587	9.72e-06	1.3e-05	0.00380068	0.00421038	1.29965e-05	3.70505e-05
2.3	4	0	0.00149127	0.0178375	8.26e-06	2.33e-05	0.00410608	0.00602053	2.33231e-05	3.70475e-05
1.5	4	2	0.00123657	0.0151454	7.93e-06	1.66e-05	0.00417576	0.00515406	1.66108e-05	3.31682e-05
1.7	4	2	0.00125514	0.0161285	7.68e-06	1.87e-05	0.00422727	0.00552145	1.86691e-05	3.26431e-05
1.9	4	2	0.00125621	0.0172663	7.36e-06	2.11e-05	0.00429428	0.00595623	2.11493e-05	3.41839e-05
2.3	4	2	0.00108093	0.0193125	5.55e-06	2.48e-05	0.00467235	0.00693717	2.48138e-05	3.60578e-05
2.5	4	2	0.000961418	0.0202376	4.27e-06	2.61e-05	0.00494075	0.00746325	2.60654e-05	3.66312e-05
1.5	4	4	0.000914023	0.0176756	6.54e-06	2.15e-05	0.00446605	0.00621382	2.15213e-05	3.43615e-05
1.7	4	4	0.00106667	0.0185465	6.76e-06	2.39e-05	0.00441951	0.00648724	2.38829e-05	3.54941e-05
2.1	4	4	0.000988997	0.0202662	5.43e-06	2.72e-05	0.00469906	0.00729942	2.72033e-05	3.7098e-05
2.3	4	4	0.000862664	0.0211525	4.12e-06	2.83e-05	0.00497356	0.00782483	2.83235e-05	3.75732e-05
2.5	4	4	0.000809839	0.0218177	3.19e-06	2.92e-05	0.00516812	0.00821595	2.91995e-05	3.79029e-05
2.7	4	4	0.000761643	0.0224541	2.23e-06	3e-05	0.00536786	0.00860405	2.99596e-05	3.81948e-05
2.9	4	4	0.000715709	0.0230678	1.24e-06	3.06e-05	0.00557523	0.00899258	3.0609e-05	3.84418e-05
1.5	4	6	0.000672076	0.0195207	5.5e-06	2.53e-05	0.0046838	0.00702007	2.5303e-05	3.61723e-05
1.7	4	6	0.000935881	0.020029	6.12e-06	2.72e-05	0.00455292	0.00710637	2.72298e-05	3.71003e-05
1.9	4	6	0.000859656	0.0208098	5.2e-06	2.85e-05	0.00474635	0.0075308	2.84573e-05	3.75132e-05
2.1	4	6	0.000797483	0.0215804	4.28e-06	2.96e-05	0.00494037	0.00795816	2.9641e-05	3.80354e-05
2.3	4	6	0.000735	0.0222251	3.28e-06	3.04e-05	0.00514974	0.0083556	3.03897e-05	3.82349e-05
2.5	4	6	0.00068207	0.0228536	2.27e-06	3.11e-05	0.00535977	0.00875113	3.1075e-05	3.846e-05
2.7	4	6	0.000630351	0.0234631	1.22e-06	3.16e-05	0.00558055	0.00915059	3.16407e-05	3.86416e-05
2.9	4	6	0.000581483	0.0240515	1.29e-07	3.21e-05	0.00580878	0.00955009	3.20997e-05	3.87715e-05
1.3	4	8	0.000535401	0.0196626	5.65e-06	2.58e-05	0.00465222	0.00704843	2.58082e-05	3.6397e-05
1.5	4	8	0.00091434	0.0200466	6.54e-06	2.77e-05	0.00446577	0.00704711	2.76835e-05	3.71272e-05
1.7	4	8	0.000831903	0.0209426	5.62e-06	2.92e-05	0.00465897	0.00751247	2.92448e-05	3.78044e-05
1.9	4	8	0.000754321	0.0216768	4.63e-06	3.03e-05	0.00486643	0.00793746	3.02714e-05	3.81243e-05
2.1	4	8	0.000687702	0.0223485	3.61e-06	3.11e-05	0.00507869	0.0083481	3.10819e-05	3.83698e-05
2.3	4	8	0.000625615	0.0229504	2.55e-06	3.16e-05	0.00530069	0.00874375	3.16335e-05	3.84611e-05
2.5	4	8	0.000569642	0.0235481	1.47e-06	3.21e-05	0.00552842	0.0091449	3.21301e-05	3.85753e-05
2.7	4	8	0.000515376	0.0241266	3.29e-07	3.25e-05	0.00576681	0.00954897	3.25082e-05	3.86297e-05
2.9	4	8	0.000464453	0.0246835	-8.43e-07	3.28e-05	0.00601242	0.0099516	3.27818e-05	3.86236e-05
1.5	4	10	0.000416898	0.0214365	4.4e-06	2.94e-05	0.00491346	0.00788495	2.93763e-05	3.7707e-05
1.7	4	10	0.000739405	0.0215762	5.17e-06	3.06e-05	0.00475332	0.00781357	3.05566e-05	3.81128e-05
1.9	4	10	0.000661481	0.0222629	4.12e-06	3.14e-05	0.00497227	0.00823459	3.13819e-05	3.83352e-05
2.1	4	10	0.000591297	0.022899	3.03e-06	3.2e-05	0.00520016	0.00864775	3.20007e-05	3.8474e-05
2.3	4	10	0.000526155	0.023529	1.9e-06	3.25e-05	0.00543794	0.00906937	3.25355e-05	3.86149e-05
2.5	4	10	0.000463378	0.0241059	7.06e-07	3.28e-05	0.00568781	0.00948211	3.28486e-05	3.85985e-05
2.7	4	10	0.000407191	0.0246498	-5.07e-07	3.3e-05	0.00594207	0.00988661	3.30409e-05	3.85048e-05
2.9	4	10	0.000355137	0.0252328	-1.75e-06	3.33e-05	0.00620262	0.0103127	3.32984e-05	3.85178e-05
2.3	5	-2	0.000302476	0.0120312	4.26e-07	1.65e-05	0.00574662	0.00714613	8.10891e-06	3.98334e-05
1.5	5	0	0.00181659	0.0107821	1.04e-05	1.05e-05	0.00365374	0.00365799	9.24047e-06	3.87725e-05
1.7	5	0	0.00171643	0.0126037	9.93e-06	1.24e-05	0.00375676	0.00407147	1.23922e-05	3.72795e-05
2.3	5	0	0.0015282	0.0174024	8.5e-06	2.24e-05	0.00405512	0.00583786	2.23989e-05	3.66486e-05
2.5	5	0	0.00124379	0.0168424	6.3e-06	1.94e-05	0.0045172	0.00595331	1.93713e-05	3.32224e-05
1.5	5	2	0.00113844	0.0151265	7.5e-06	1.63e-05	0.00426408	0.00520025	1.6317e-05	3.29677e-05
1.7	5	2	0.00131421	0.0158846	7.97e-06	1.83e-05	0.00416702	0.00540011	1.82997e-05	3.24694e-05
1.9	5	2	0.00125835	0.0171032	7.37e-06	2.08e-05	0.00429184	0.00589836	2.07605e-05	3.3956e-05
2.3	5	2	0.00109284	0.0191388	5.63e-06	2.44e-05	0.00465592	0.00686328	2.44365e-05	3.58168e-05
1.5	5	4	0.000973622	0.0174908	6.8e-06	2.13e-05	0.00441241	0.00611324	2.12671e-05	3.42161e-05
1.7	5	4	0.00107454	0.0180497	6.8e-06	2.27e-05	0.00441148	0.00630794	2.26515e-05	3.36358e-05
2.1	5	4	0.00137224	0.0194251	7.73e-06	2.71e-05	0.00421618	0.00664152	2.7133e-05	3.71132e-05
2.3	5	4	0.000867433	0.0211154	4.15e-06	2.83e-05	0.00496698	0.00780625	2.82544e-05	3.75835e-05
2.5	5	4	0.000814993	0.0217787	3.22e-06	2.91e-05	0.00516039	0.00819558	2.91312e-05	3.79093e-05
2.7	5	4	0.000767171	0.022413	2.28e-06	2.99e-05	0.0053589	0.00858176	2.98923e-05	3.81975e-05
2.9	5	4	0.000721581	0.0230245	1.29e-06	3.05e-05	0.00556501	0.00896828	3.05427e-05	3.84415e-05
1.5	5	6	0.000678274	0.0194737	5.53e-06	2.52e-05	0.00467823	0.00699924	2.5205e-05	3.61414e-05
1.7	5	6	0.000940003	0.0199231	6.14e-06	2.7e-05	0.00454871	0.00706567	2.69617e-05	3.68834e-05
1.9	5	6	0.000868025	0.0207582	5.25e-06	2.84e-05	0.00473681	0.00750499	2.83613e-05	3.74726e-05
2.1	5	6	0.000802324	0.021535	4.3e-06	2.95e-05	0.00493427	0.00793684	2.9546e-05	3.7992e-05
2.3	5	6	0.000740187	0.022178	3.31e-06	3.03e-05	0.00514258	0.00833251	3.02957e-05	3.81883e-05
2.5	5	6	0.000687574	0.0228045	2.31e-06	3.1e-05	0.00535152	0.00872615	3.09818e-05	3.84105e-05
2.7	5	6	0.000636155	0.0234117	1.26e-06	3.15e-05	0.00557115	0.00912361	3.15483e-05	3.85898e-05
2.9	5	6	0.000587577	0.0239979	1.8e-07	3.2e-05	0.00579818	0.00952103	3.20084e-05	3.87181e-05
1.3	5	8	0.00054177	0.0196108	5.67e-06	2.57e-05	0.00464725	0.00702629	2.56937e-05	3.63293e-05
1.5	5	8	0.000918419	0.0200614	6.56e-06	2.77e-05	0.0044621	0.00704952	2.77416e-05	3.72353e-05
1.7	5	8	0.00083242	0.0209011	5.62e-06	2.91e-05	0.00465844	0.00749719	2.91316e-05	3.77298e-05
1.9	5	8	0.000759082	0.021627	4.65e-06	3.02e-05	0.004861	0.00791506	3.01593e-05	3.8047e-05
2.1	5	8	0.000692776	0.022297	3.65e-06	3.1e-05	0.0050723	0.00832399	3.09707e-05	3.82897e-05
2.3	5	8	0.000630987	0.0229594	2.59e-06	3.17e-05	0.00529328	0.00874154	3.16954e-05	3.85559e-05
2.5	5	8	0.000570995	0.0235671	1.48e-06	3.22e-05	0.00552639	0.00915078	3.21923e-05	3.86682e-05
2.7	5	8	0.000516914	0.024145	3.41e-07	3.26e-05	0.00576432	0.00955444	3.25704e-05	3.87205e-05
2.9	5	8	0.000466164	0.0247014	-8.29e-07	3.28e-05	0.00600944	0.00995667	3.28442e-05	3.8713e-05
1.5	5	10	0.00041877	0.021451	4.41e-06	2.94e-05	0.00491178	0.007889	2.94241e-05	3.77887e-05
1.7	5	10	0.000740017	0.0215922	5.17e-06	3.06e-05	0.0047527	0.00781889	3.06052e-05	3.81912e-05
1.9	5	10	0.000662287	0.0222787	4.13e-06	3.14e-05	0.00497135	0.0082397	3.1431e-05	3.8411e-05
2.1	5	10	0.000592286	0.0229144	3.04e-06	3.21e-05	0.00519892	0.0086526	3.20501e-05	3.85476e-05
2.3	5	10	0.00052732	0.023482	1.91e-06	3.24e-05	0.00543634	0.00905003	3.24138e-05	3.85108e-05
2.5	5	10	0.000469125	0.024108	7.48e-07	3.29e-05	0.00567919	0.0094765	3.28981e-05	3.86689e-05
2.7	5	10	0.000408674	0.0246639	-4.96e-07	3.31e-05	0.00593967	0.00989048	3.30906e-05	3.85743e-05
2.9	5	10	0.000356757	0.0251825	-1.74e-06	3.32e-05	0.00619981	0.0102901	3.31798e-05	3.84137e-05
2.3	6	-2	0.000308835	0.0119127	4.68e-07	1.64e-05	0.00573785	0.0071315	7.96063e-06	4.0005e-05
1.7	6	0	0.00171705	0.0125599	9.93e-06	1.23e-05	0.00375613	0.00405696	1.23075e-05	3.74029e-05
2.3	6	0	0.0015348	0.0173137	8.55e-06	2.22e-05	0.00404601	0.00580172	2.22069e-05	3.65249e-05
1.5	6	2	0.00124588	0.0149878	7.97e-06	1.63e-05	0.00416738	0.00509543	1.62906e-05	3.29403e-05
1.7	6	2	0.00131404	0.01589	7.97e-06	1.83e-05	0.00416719	0.00540204	1.83115e-05	3.25085e-05
1.9	6	2	0.00125795	0.0171089	7.37e-06	2.08e-05	0.00429229	0.00590062	2.07727e-05	3.39913e-05
2.3	6	2	0.00109285	0.0191445	5.63e-06	2.45e-05	0.0046559	0.0068653	2.4451e-05	3.58496e-05
2.5	6	2	0.000973681	0.0201346	4.36e-06	2.59e-05	0.00492236	0.00741232	2.58785e-05	3.65927e-05
1.5	6	4	0.000922841	0.0175627	6.58e-06	2.13e-05	0.00445812	0.00616885	2.12759e-05	3.42403e-05
1.7	6	4	0.00107455	0.0180554	6.8e-06	2.27e-05	0.00441147	0.00630993	2.26659e-05	3.36651e-05
2.1	6	4	0.00137137	0.0194308	7.73e-06	2.71e-05	0.00421727	0.00664432	2.71439e-05	3.71344e-05
2.3	6	4	0.000867522	0.0211193	4.15e-06	2.83e-05	0.00496686	0.00780762	2.82655e-05	3.76039e-05
2.5	6	4	0.000815113	0.0217826	3.23e-06	2.91e-05	0.00516021	0.00819693	2.91426e-05	3.79295e-05
2.7	6	4	0.000767322	0.0224168	2.28e-06	2.99e-05	0.00535866	0.00858305	2.99037e-05	3.82171e-05
2.9	6	4	0.000721761	0.0230283	1.29e-06	3.06e-05	0.0055647	0.00896952	3.05542e-05	3.84606e-05
1.5	6	6	0.000678481	0.0194764	5.53e-06	2.52e-05	0.00467804	0.00700007	2.52127e-05	3.61577e-05
1.7	6	6	0.000940037	0.019926	6.15e-06	2.7e-05	0.00454868	0.0070667	2.69699e-05	3.6899e-05
1.9	6	6	0.000868086	0.0207611	5.25e-06	2.84e-05	0.00473674	0.00750599	2.83696e-05	3.74876e-05
2.1	6	6	0.000802414	0.0215379	4.3e-06	2.96e-05	0.00493415	0.00793781	2.95544e-05	3.80064e-05
2.3	6	6	0.000740304	0.0221808	3.31e-06	3.03e-05	0.00514242	0.00833346	3.03043e-05	3.82025e-05
2.5	6	6	0.000687716	0.0228073	2.31e-06	3.1e-05	0.00535131	0.00872707	3.09905e-05	3.84244e-05
2.7	6	6	0.000636321	0.0234144	1.26e-06	3.16e-05	0.00557088	0.00912449	3.15571e-05	3.86035e-05
2.9	6	6	0.000587766	0.0240005	1.81e-07	3.2e-05	0.00579785	0.00952185	3.20171e-05	3.87314e-05
1.3	6	8	0.000541981	0.0196128	5.68e-06	2.57e-05	0.00464708	0.00702691	2.56998e-05	3.63417e-05
1.5	6	8	0.000918449	0.0200636	6.56e-06	2.77e-05	0.00446207	0.00705027	2.77478e-05	3.7247e-05
1.7	6	8	0.000832476	0.0209034	5.62e-06	2.91e-05	0.00465839	0.00749794	2.91381e-05	3.77411e-05
1.9	6	8	0.000759162	0.0216292	4.65e-06	3.02e-05	0.00486091	0.0079158	3.01659e-05	3.80579e-05
2.1	6	8	0.000692879	0.0222992	3.65e-06	3.1e-05	0.00507217	0.00832471	3.09775e-05	3.83004e-05
2.3	6	8	0.000631112	0.0229615	2.59e-06	3.17e-05	0.0052931	0.00874223	3.17022e-05	3.85664e-05
2.5	6	8	0.000571141	0.0235692	1.48e-06	3.22e-05	0.00552617	0.00915141	3.2199e-05	3.86782e-05
2.7	6	8	0.00051708	0.0241471	3.42e-07	3.26e-05	0.00576405	0.00955504	3.25772e-05	3.87304e-05
2.9	6	8	0.000466349	0.0247033	-8.28e-07	3.29e-05	0.00600912	0.00995721	3.28509e-05	3.87227e-05
1.5	6	10	0.000418972	0.0214526	4.41e-06	2.94e-05	0.0049116	0.00788943	2.94292e-05	3.77974e-05
1.7	6	10	0.000740083	0.0215939	5.17e-06	3.06e-05	0.00475263	0.00781947	3.06105e-05	3.81998e-05
1.9	6	10	0.000662374	0.0222804	4.13e-06	3.14e-05	0.00497125	0.00824026	3.14363e-05	3.84192e-05
2.1	6	10	0.000592393	0.0229161	3.04e-06	3.21e-05	0.00519878	0.00865312	3.20554e-05	3.85555e-05
2.3	6	10	0.000527446	0.0234836	1.91e-06	3.24e-05	0.00543616	0.00905053	3.24192e-05	3.85187e-05
2.5	6	10	0.000469269	0.0241096	7.49e-07	3.29e-05	0.00567898	0.00947696	3.29035e-05	3.86766e-05
2.7	6	10	0.000408834	0.0246654	-4.95e-07	3.31e-05	0.00593941	0.0098909	3.3096e-05	3.85818e-05
2.9	6	10	0.000356932	0.025184	-1.74e-06	3.32e-05	0.0061995	0.0102905	3.31852e-05	3.84212e-05
1.9	7	-2	0.000309024	0.00967174	2.2e-06	1.54e-05	0.00537407	0.00652521	5.55302e-06	3.23384e-05
1.5	7	0	0.00177804	0.0110759	1.03e-05	1.06e-05	0.00368843	0.00371582	9.68934e-06	3.8562e-05
1.7	7	0	0.00168995	0.0128384	9.8e-06	1.28e-05	0.00378376	0.00416207	1.27954e-05	3.72542e-05
2.3	7	0	0.00150463	0.0175107	8.35e-06	2.25e-05	0.00408765	0.00589724	2.25492e-05	3.64995e-05
1.5	7	2	0.00124436	0.015068	7.96e-06	1.65e-05	0.00416874	0.00512353	1.64616e-05	3.26647e-05
1.7	7	2	0.00130502	0.016004	7.92e-06	1.85e-05	0.0041764	0.00544663	1.85453e-05	3.25815e-05
1.9	7	2	0.00125685	0.0172116	7.36e-06	2.1e-05	0.00429355	0.00593689	2.10183e-05	3.4104e-05
2.3	7	2	0.0010849	0.0192541	5.58e-06	2.47e-05	0.00466688	0.00691234	2.46865e-05	3.59737e-05
1.5	7	4	0.000965485	0.0175481	6.76e-06	2.14e-05	0.00441974	0.00613815	2.13798e-05	3.42494e-05
1.7	7	4	0.00107059	0.0185517	6.78e-06	2.39e-05	0.00441552	0.00648624	2.39126e-05	3.55623e-05
2.1	7	4	0.000989084	0.0202781	5.43e-06	2.72e-05	0.00469895	0.00730363	2.72358e-05	3.71607e-05
2.3	7	4	0.000862935	0.0211642	4.12e-06	2.84e-05	0.00497319	0.00782887	2.83565e-05	3.76339e-05
2.5	7	4	0.000810204	0.0218293	3.19e-06	2.92e-05	0.00516757	0.00821991	2.92331e-05	3.79622e-05
2.7	7	4	0.000762099	0.0224655	2.24e-06	3e-05	0.00536712	0.00860787	2.99935e-05	3.82525e-05
2.9	7	4	0.000716251	0.023079	1.25e-06	3.06e-05	0.00557429	0.00899626	3.06432e-05	3.84985e-05
1.5	7	6	0.0006727	0.0194631	5.5e-06	2.52e-05	0.00468324	0.00699899	2.51565e-05	3.60394e-05
1.7	7	6	0.000939791	0.019968	6.14e-06	2.71e-05	0.00454893	0.00708177	2.70825e-05	3.69664e-05
1.9	7	6	0.000863741	0.0208107	5.22e-06	2.85e-05	0.00474169	0.00752766	2.8482e-05	3.75579e-05
2.1	7	6	0.000797757	0.0215259	4.28e-06	2.95e-05	0.00494002	0.00793782	2.94933e-05	3.79009e-05
2.3	7	6	0.000739453	0.0222234	3.3e-06	3.04e-05	0.00514359	0.00835034	3.0415e-05	3.82768e-05
2.5	7	6	0.000682498	0.0228619	2.28e-06	3.11e-05	0.00535913	0.00875381	3.11006e-05	3.8501e-05
2.7	7	6	0.00063085	0.0234711	1.22e-06	3.17e-05	0.00557974	0.00915315	3.16665e-05	3.86818e-05
2.9	7	6	0.000582051	0.0239951	1.34e-07	3.2e-05	0.00580779	0.00952695	3.1954e-05	3.86354e-05
1.3	7	8	0.000540453	0.0195981	5.67e-06	2.57e-05	0.00464828	0.0070225	2.56562e-05	3.62524e-05
1.5	7	8	0.00091823	0.0200474	6.56e-06	2.77e-05	0.00446226	0.00704474	2.77022e-05	3.7162e-05
1.7	7	8	0.000832071	0.0208873	5.62e-06	2.91e-05	0.0046588	0.00749248	2.90912e-05	3.76593e-05
1.9	7	8	0.00075858	0.0216752	4.65e-06	3.03e-05	0.00486157	0.00793315	3.02911e-05	3.81568e-05
2.1	7	8	0.000688012	0.0223549	3.62e-06	3.11e-05	0.0050783	0.00835021	3.11018e-05	3.84011e-05
2.3	7	8	0.000625991	0.0229567	2.56e-06	3.17e-05	0.00530017	0.00874576	3.16535e-05	3.84917e-05
2.5	7	8	0.00057008	0.0235542	1.47e-06	3.22e-05	0.00552776	0.0091468	3.21502e-05	3.86054e-05
2.7	7	8	0.000515874	0.0241325	3.33e-07	3.25e-05	0.00576601	0.00955074	3.25283e-05	3.8659e-05
2.9	7	8	0.000465007	0.0246892	-8.39e-07	3.28e-05	0.00601145	0.00995323	3.28019e-05	3.86524e-05
1.5	7	10	0.000417504	0.0214412	4.41e-06	2.94e-05	0.00491292	0.00788625	2.93917e-05	3.77333e-05
1.7	7	10	0.000739603	0.0215813	5.17e-06	3.06e-05	0.00475312	0.00781528	3.05722e-05	3.8138e-05
1.9	7	10	0.000661742	0.022268	4.12e-06	3.14e-05	0.00497197	0.00823624	3.13977e-05	3.83596e-05
2.1	7	10	0.000591617	0.022904	3.04e-06	3.2e-05	0.00519976	0.0086493	3.20166e-05	3.84977e-05
2.3	7	10	0.000526532	0.0235338	1.9e-06	3.26e-05	0.00543742	0.00907085	3.25516e-05	3.86382e-05
2.5	7	10	0.000463809	0.0241105	7.1e-07	3.29e-05	0.00568717	0.00948345	3.28645e-05	3.86211e-05
2.7	7	10	0.000407671	0.0246543	-5.04e-07	3.31e-05	0.0059413	0.00988785	3.30569e-05	3.85272e-05
2.9	7	10	0.000355661	0.0252371	-1.75e-06	3.33e-05	0.00620171	0.0103138	3.33144e-05	3.85399e-05
1.9	8	-2	0.000303042	0.0110871	2.17e-06	1.54e-05	0.00538089	0.00653657	7.28936e-06	3.24125e-05
2.3	8	-2	0.00181776	0.0116478	1.04e-05	1.08e-05	0.00365553	0.00371174	1.07802e-05	3.62999e-05
1.5	8	0	0.00163021	0.0118475	9.62e-06	1.09e-05	0.00382148	0.00393756	1.08226e-05	3.7736e-05
1.7	8	0	0.00161667	0.0133849	9.44e-06	1.37e-05	0.00385851	0.00438152	1.3722e-05	3.621e-05
2.3	8	0	0.00145226	0.0183322	8e-06	2.44e-05	0.00415992	0.00622698	2.44037e-05	3.74642e-05
1.5	8	2	0.00123157	0.0152377	7.9e-06	1.68e-05	0.00418026	0.0051882	1.68007e-05	3.22937e-05
1.7	8	2	0.0012925	0.0162829	7.86e-06	1.92e-05	0.00418916	0.00554981	1.91548e-05	3.28737e-05
1.9	8	2	0.00125489	0.0174112	7.35e-06	2.15e-05	0.00429578	0.00600723	2.15002e-05	3.43112e-05
2.3	8	2	0.00106901	0.0220298	5.48e-06	3.22e-05	0.00468881	0.00792642	3.21989e-05	3.93964e-05
2.5	8	2	0.00139399	0.0192841	7.37e-06	2.64e-05	0.00429189	0.00665052	2.63923e-05	3.67913e-05
1.5	8	4	0.00090097	0.0177861	6.48e-06	2.17e-05	0.0044778	0.00626053	2.17476e-05	3.44349e-05
1.7	8	4	0.00105878	0.0186428	6.72e-06	2.41e-05	0.00442756	0.00652664	2.40985e-05	3.55769e-05
2.1	8	4	0.000980978	0.0203607	5.38e-06	2.74e-05	0.00470917	0.00734094	2.74115e-05	3.71995e-05
2.3	8	4	0.000853614	0.0212513	4.06e-06	2.85e-05	0.00498605	0.00787058	2.85306e-05	3.76805e-05
2.5	8	4	0.000800211	0.0219201	3.12e-06	2.94e-05	0.00518256	0.00826514	2.9406e-05	3.80147e-05
2.7	8	4	0.000751457	0.0225601	2.16e-06	3.02e-05	0.00538436	0.00865679	3.01645e-05	3.83106e-05
2.9	8	4	0.000705013	0.0231129	1.16e-06	3.06e-05	0.00559384	0.00902372	3.06402e-05	3.83853e-05
1.5	8	6	0.000665188	0.0195593	5.47e-06	2.54e-05	0.00469	0.00703838	2.5377e-05	3.61538e-05
1.7	8	6	0.00093163	0.0200627	6.1e-06	2.73e-05	0.00455725	0.00712156	2.73015e-05	3.70896e-05
1.9	8	6	0.000854954	0.0209077	5.18e-06	2.87e-05	0.00475171	0.00757029	2.87003e-05	3.7687e-05
2.1	8	6	0.000788318	0.0216258	4.22e-06	2.97e-05	0.00495192	0.00798364	2.971e-05	3.80347e-05
2.3	8	6	0.000729416	0.0222635	3.24e-06	3.05e-05	0.00515744	0.00837581	3.0457e-05	3.82382e-05
2.5	8	6	0.000676092	0.0228943	2.23e-06	3.11e-05	0.00536874	0.00877338	3.11414e-05	3.84674e-05
2.7	8	6	0.000623997	0.023506	1.17e-06	3.17e-05	0.00559085	0.00917498	3.1706e-05	3.8652e-05
2.9	8	6	0.000574766	0.0240972	7.31e-08	3.22e-05	0.00582047	0.00957677	3.21642e-05	3.87846e-05
1.3	8	8	0.00052834	0.0197081	5.62e-06	2.59e-05	0.00465772	0.00706872	2.59039e-05	3.64268e-05
1.5	8	8	0.00091015	0.0200872	6.52e-06	2.78e-05	0.00446954	0.00706424	2.77779e-05	3.71629e-05
1.7	8	8	0.000827291	0.0209842	5.6e-06	2.93e-05	0.00466368	0.00753099	2.93379e-05	3.78444e-05
1.9	8	8	0.000749288	0.0217198	4.6e-06	3.04e-05	0.00487217	0.0079576	3.03629e-05	3.8168e-05
2.1	8	8	0.000682282	0.0223933	3.58e-06	3.12e-05	0.00508552	0.00837004	3.11721e-05	3.84169e-05
2.3	8	8	0.000619828	0.0229974	2.52e-06	3.17e-05	0.00530868	0.00876768	3.17228e-05	3.8511e-05
2.5	8	8	0.000563503	0.0235975	1.42e-06	3.22e-05	0.00553763	0.00917098	3.22187e-05	3.8628e-05
2.7	8	8	0.000508902	0.0241784	2.79e-07	3.26e-05	0.0057773	0.00957725	3.25957e-05	3.86835e-05
2.9	8	8	0.000457672	0.024738	-9e-07	3.29e-05	0.00602421	0.00998218	3.28684e-05	3.86785e-05
1.5	8	10	0.000409836	0.0214875	4.37e-06	2.95e-05	0.00491982	0.00790849	2.94855e-05	3.7777e-05
1.7	8	10	0.000734573	0.0216229	5.14e-06	3.07e-05	0.00475825	0.00783434	3.06641e-05	3.81859e-05
1.9	8	10	0.000656275	0.0223115	4.09e-06	3.15e-05	0.0049782	0.00825714	3.14884e-05	3.84114e-05
2.1	8	10	0.000585732	0.0229497	3e-06	3.21e-05	0.00520717	0.00867226	3.21064e-05	3.85524e-05
2.3	8	10	0.000520248	0.02352	1.86e-06	3.25e-05	0.0054461	0.00907207	3.2469e-05	3.85185e-05
2.5	8	10	0.000461585	0.0240864	6.94e-07	3.28e-05	0.0056905	0.00947645	3.27819e-05	3.85039e-05
2.7	8	10	0.000405193	0.0246941	-5.23e-07	3.31e-05	0.00594531	0.00990674	3.31434e-05	3.85853e-05
2.9	8	10	0.000348388	0.0252293	-1.81e-06	3.32e-05	0.00621437	0.0103197	3.32313e-05	3.84256e-05
1.7	9	-2	0.000300118	0.0104062	3.03e-06	1.49e-05	0.00520139	0.00623741	6.60725e-06	4.00418e-05
2.3	9	-2	0.00176472	0.0129835	1.01e-05	1.32e-05	0.00372873	0.00417853	1.32171e-05	3.3199e-05
1.5	9	0	0.00145397	0.0128202	8.86e-06	1.23e-05	0.0039801	0.00426145	1.23186e-05	3.71813e-05
1.7	9	0	0.00152607	0.0140715	9e-06	1.49e-05	0.00395092	0.00466047	1.49178e-05	3.51537e-05
2.3	9	0	0.00138781	0.0191184	7.58e-06	2.61e-05	0.00424886	0.00656122	2.61343e-05	3.80493e-05
2.5	9	0	0.00123282	0.0179468	6.22e-06	2.19e-05	0.00453365	0.00635473	2.19339e-05	3.4556e-05
1.5	9	2	0.00105821	0.0156908	7.16e-06	1.73e-05	0.00433628	0.0054383	1.73399e-05	3.24156e-05
1.7	9	2	0.00120556	0.0167692	7.44e-06	2e-05	0.00427784	0.00577402	2.00058e-05	3.35723e-05
2.3	9	2	0.00111574	0.0195636	5.78e-06	2.57e-05	0.00462431	0.00699294	2.56689e-05	3.64018e-05
2.5	9	2	0.000927746	0.0206459	4.03e-06	2.69e-05	0.00499126	0.00765008	2.69053e-05	3.70074e-05
1.5	9	4	0.000878627	0.0180063	6.39e-06	2.22e-05	0.00449791	0.00635168	2.22136e-05	3.46299e-05
1.7	9	4	0.00104305	0.0188408	6.65e-06	2.45e-05	0.0044436	0.00660743	2.45458e-05	3.57896e-05
2.1	9	4	0.000964905	0.0204937	5.28e-06	2.77e-05	0.00472942	0.0074039	2.76772e-05	3.72659e-05
2.3	9	4	0.000839446	0.021383	3.96e-06	2.88e-05	0.0050056	0.00793381	2.87935e-05	3.77576e-05
2.5	9	4	0.000785031	0.0220574	3.01e-06	2.97e-05	0.00520533	0.00833374	2.96672e-05	3.81005e-05
2.7	9	4	0.000735311	0.0227032	2.03e-06	3.04e-05	0.00541052	0.00873097	3.04228e-05	3.84045e-05
2.9	9	4	0.000687977	0.0232628	1.01e-06	3.09e-05	0.00562348	0.00910385	3.08964e-05	3.84872e-05
1.5	9	6	0.000647324	0.0190228	5.39e-06	2.39e-05	0.00470608	0.00685642	2.39396e-05	3.31518e-05
1.7	9	6	0.00166754	0.018846	9.69e-06	2.75e-05	0.00380662	0.00612796	2.74586e-05	3.70966e-05
1.9	9	6	0.000845569	0.0209827	5.12e-06	2.89e-05	0.00476241	0.00760551	2.88552e-05	3.77038e-05
2.1	9	6	0.00077806	0.021704	4.16e-06	2.99e-05	0.00496484	0.00802226	2.98621e-05	3.80599e-05
2.3	9	6	0.000718356	0.0223453	3.17e-06	3.06e-05	0.00517271	0.00841807	3.06062e-05	3.82709e-05
2.5	9	6	0.000664282	0.0229804	2.15e-06	3.13e-05	0.00538646	0.00881962	3.12885e-05	3.8507e-05
2.7	9	6	0.000611473	0.0235969	1.07e-06	3.19e-05	0.00561113	0.00922549	3.18513e-05	3.86975e-05
2.9	9	6	0.000561551	0.024129	-3.67e-08	3.21e-05	0.00584346	0.00960625	3.21365e-05	3.86594e-05
1.3	9	8	0.000518912	0.0197966	5.59e-06	2.61e-05	0.00466508	0.00710579	2.6105e-05	3.65074e-05
1.5	9	8	0.000901773	0.0201719	6.49e-06	2.8e-05	0.00447708	0.00709977	2.79768e-05	3.72541e-05
1.7	9	8	0.000818098	0.021009	5.55e-06	2.94e-05	0.00467305	0.00754707	2.93611e-05	3.77645e-05
1.9	9	8	0.000743323	0.0217392	4.57e-06	3.04e-05	0.00487897	0.00796992	3.03832e-05	3.80959e-05
2.1	9	8	0.000675682	0.0224149	3.54e-06	3.12e-05	0.00509384	0.00838448	3.11905e-05	3.83519e-05
2.3	9	8	0.000612619	0.023084	2.47e-06	3.19e-05	0.00531862	0.00880825	3.19118e-05	3.86282e-05
2.5	9	8	0.000551391	0.0236367	1.34e-06	3.22e-05	0.00555579	0.00919983	3.22346e-05	3.85735e-05
2.7	9	8	0.00050056	0.0242089	2.15e-07	3.26e-05	0.00579081	0.00959934	3.26106e-05	3.86325e-05
2.9	9	8	0.000448819	0.0247718	-9.73e-07	3.29e-05	0.00603962	0.0100071	3.28823e-05	3.86302e-05
1.5	9	10	0.000400517	0.0215215	4.33e-06	2.95e-05	0.00492821	0.00792732	2.95383e-05	3.77519e-05
1.7	9	10	0.000728981	0.0216508	5.12e-06	3.07e-05	0.00476395	0.0078489	3.07143e-05	3.81677e-05
1.9	9	10	0.000650078	0.0223415	4.06e-06	3.15e-05	0.00498527	0.00827374	3.1537e-05	3.83992e-05
2.1	9	10	0.000578956	0.0229823	2.96e-06	3.22e-05	0.00521571	0.00869115	3.21539e-05	3.85449e-05
2.3	9	10	0.000512919	0.0235555	1.81e-06	3.25e-05	0.00545621	0.00909345	3.25156e-05	3.85142e-05
2.5	9	10	0.000453759	0.0241249	6.38e-07	3.28e-05	0.00570224	0.00950036	3.28274e-05	3.8502e-05
2.7	9	10	0.000396902	0.0247355	-5.87e-07	3.32e-05	0.00595874	0.00993326	3.31874e-05	3.85846e-05
2.9	9	10	0.000339684	0.0252738	-1.88e-06	3.33e-05	0.00622951	0.0103489	3.3274e-05	3.84257e-05
2.3	10	-4	0.000291046	0.0115625	3.5e-07	1.65e-05	0.0057624	0.00717242	7.47138e-06	4.01959e-05
2.3	10	-2	0.00173099	0.0148978	9.84e-06	1.73e-05	0.00377527	0.00482432	1.72561e-05	3.39175e-05
1.5	10	0	0.00132068	0.0137584	8.29e-06	1.39e-05	0.00410006	0.0046404	1.38903e-05	3.53348e-05
1.7	10	0	0.00143576	0.0147679	8.56e-06	1.62e-05	0.00404304	0.00494686	1.6165e-05	3.36885e-05
1.5	10	2	0.00131999	0.0159488	8.28e-06	1.87e-05	0.00410068	0.0053796	1.86633e-05	3.28285e-05
1.7	10	2	0.00127131	0.0170819	7.76e-06	2.1e-05	0.00421077	0.00583672	2.10015e-05	3.40597e-05
2.3	10	2	0.00108386	0.0199268	5.57e-06	2.64e-05	0.00466832	0.00715488	2.64352e-05	3.6782e-05
2.5	10	2	0.000897674	0.0210119	3.82e-06	2.77e-05	0.00503637	0.0078184	2.76643e-05	3.74114e-05
2.7	10	2	0.000846872	0.0216376	2.89e-06	2.84e-05	0.00522979	0.00819279	2.84373e-05	3.76555e-05
2.9	10	2	0.000805817	0.022283	1.99e-06	2.93e-05	0.00541844	0.00857509	2.92706e-05	3.80377e-05
1.5	10	4	0.000762637	0.0182962	5.89e-06	2.25e-05	0.0046023	0.00652507	2.25339e-05	3.381e-05
1.7	10	4	0.00138006	0.018491	8.29e-06	2.51e-05	0.00409985	0.00623648	2.50909e-05	3.6042e-05
1.9	10	4	0.000944565	0.0200495	5.66e-06	2.68e-05	0.00464955	0.00718519	2.6846e-05	3.69153e-05
2.1	10	4	0.000876833	0.0208821	4.75e-06	2.82e-05	0.00484039	0.00762719	2.82131e-05	3.75586e-05
2.3	10	4	0.000816271	0.0215723	3.81e-06	2.92e-05	0.00503758	0.00802781	2.91538e-05	3.78844e-05
2.5	10	4	0.000764528	0.0222447	2.86e-06	3e-05	0.00523609	0.00842729	3.0025e-05	3.82384e-05
2.7	10	4	0.000713553	0.0228341	1.86e-06	3.06e-05	0.00544577	0.00880726	3.06044e-05	3.83764e-05
2.9	10	4	0.000669309	0.0234534	8.58e-07	3.12e-05	0.00565597	0.00920224	3.12475e-05	3.86453e-05
1.5	10	6	0.000623312	0.0199184	5.29e-06	2.62e-05	0.00472769	0.00719481	2.61526e-05	3.65742e-05
1.7	10	6	0.000902707	0.0203327	5.96e-06	2.79e-05	0.00458675	0.00723967	2.79023e-05	3.73588e-05
1.9	10	6	0.000827668	0.0211158	5.03e-06	2.91e-05	0.00478281	0.00766922	2.91238e-05	3.77981e-05
2.1	10	6	0.000762905	0.021834	4.07e-06	3.01e-05	0.00498394	0.00808478	3.0127e-05	3.81647e-05
2.3	10	6	0.000702115	0.0224807	3.06e-06	3.09e-05	0.00519512	0.00848598	3.08672e-05	3.83851e-05
2.5	10	6	0.000647016	0.0231222	2.02e-06	3.15e-05	0.00541236	0.00889348	3.1547e-05	3.86306e-05
2.7	10	6	0.000593232	0.0236821	9.31e-07	3.19e-05	0.00564069	0.0092807	3.19353e-05	3.86521e-05
2.9	10	6	0.000546753	0.0242715	-1.6e-07	3.24e-05	0.00586921	0.00968186	3.23901e-05	3.87956e-05
1.3	10	8	0.00049886	0.0199464	5.51e-06	2.64e-05	0.00468072	0.00717094	2.64324e-05	3.66825e-05
1.5	10	8	0.000889246	0.0203083	6.43e-06	2.83e-05	0.00448835	0.00715639	2.83021e-05	3.74423e-05
1.7	10	8	0.000804437	0.0210865	5.48e-06	2.95e-05	0.00468699	0.00758564	2.95096e-05	3.77836e-05
1.9	10	8	0.000732614	0.0218128	4.51e-06	3.05e-05	0.00489118	0.00800628	3.0528e-05	3.81249e-05
2.1	10	8	0.000664059	0.0224925	3.47e-06	3.13e-05	0.00510848	0.00842471	3.13327e-05	3.83899e-05
2.3	10	8	0.000600119	0.0231039	2.39e-06	3.19e-05	0.00533587	0.00882893	3.18797e-05	3.84961e-05
2.5	10	8	0.000542381	0.0237123	1.27e-06	3.24e-05	0.00556931	0.0092394	3.23731e-05	3.86242e-05
2.7	10	8	0.000486435	0.024302	1.05e-07	3.27e-05	0.0058137	0.00965317	3.27471e-05	3.86869e-05
2.9	10	8	0.000433973	0.0248704	-1.1e-06	3.3e-05	0.00606545	0.0100657	3.30165e-05	3.86868e-05
1.5	10	10	0.000385017	0.0216141	4.27e-06	2.97e-05	0.00494216	0.00797196	2.97252e-05	3.78414e-05
1.7	10	10	0.000718799	0.0217342	5.07e-06	3.09e-05	0.00477434	0.0078872	3.08979e-05	3.8266e-05
1.9	10	10	0.000639011	0.0224286	4e-06	3.17e-05	0.00499788	0.00831578	3.17181e-05	3.85046e-05
2.1	10	10	0.000567038	0.0230126	2.89e-06	3.22e-05	0.00523073	0.00871413	3.21615e-05	3.84792e-05
2.3	10	10	0.000504551	0.023641	1.76e-06	3.27e-05	0.00546776	0.00913522	3.26928e-05	3.86284e-05
2.5	10	10	0.000440319	0.0242267	5.41e-07	3.3e-05	0.0057224	0.00955554	3.30026e-05	3.86185e-05
2.7	10	10	0.000382795	0.0247795	-6.96e-07	3.32e-05	0.00598159	0.00996773	3.31909e-05	3.85282e-05
2.9	10	10	0.000329571	0.0253075	-1.96e-06	3.33e-05	0.00624711	0.0103754	3.32761e-05	3.8371e-05

## Sheet: (33,25.4)
																					whole potentials of the equilibrium droplet		the unit length energy barrier
0	0	0	0.00182368	0	1.04e-05	1.04e-05	0.00364736	0.00364736	0	4.17933e-05		(0,0,0)	-1.399	-241.5	-6.966	-21.5	-354.2	-181.6	-11.09		2.49e-06		2.9e-06
0.2	0	0	0.00175407	0.00815187	1.04e-05	1.05e-05	0.00365571	0.00366128	5.2801e-06	4.09684e-05		(1,0,0)	-0.5077	813.6	38.52	86.87	1107	730.2	288.4
0.4	0	0	0.00169439	0.0105368	1.03e-05	1.05e-05	0.00367839	0.00369908	8.78511e-06	4.02782e-05		(0,1,0)	0.1139	-0.4389	-0.1837	-0.03685	-0.3479	0.2997	-0.4048
0.8	0	0	0.00157504	0.0123276	9.88e-06	1.18e-05	0.00376671	0.0039875	1.18338e-05	3.92433e-05		(0,0,1)	0.2113	6.712	-0.2345	0.202	9.003	4.084	-0.2626
1.2	0	0	0.00145568	0.0142904	9.18e-06	1.55e-05	0.00391232	0.0047101	1.54917e-05	3.81554e-05		(2,0,0)	3.616	-881.8	-41.22	-96.76	-1159	-897.4	-466.4
1.6	0	0	0.00133633	0.0158252	8.21e-06	1.83e-05	0.00411522	0.00534715	1.83283e-05	3.71388e-05		(1,1,0)	-0.2258	-0.3364	0.4114	0.132	-1.349	-0.8808	0.5418
1.9	0	0	0.00117692	0.0165021	6.93e-06	1.9e-05	0.00438466	0.00575017	1.90207e-05	3.33799e-05		(1,0,1)	-0.3501	-13.04	0.3963	-0.3871	-17.95	-9.442	-1.363
2	0	0	0.00114559	0.0168309	6.56e-06	1.95e-05	0.00446107	0.00591368	1.95299e-05	3.29966e-05		(0,2,0)	0.001513	0.009315	-0.003753	-0.002883	0.02009	0.003278	0.002506
2.1	0	0	0.00111721	0.0171304	6.2e-06	2e-05	0.00453751	0.00606809	1.99706e-05	3.26646e-05		(0,1,1)	-0.001703	0.007486	0.002214	-0.000378	0.006485	-0.004361	0.01338
2.2	0	0	0.00109004	0.0174037	5.82e-06	2.03e-05	0.00461576	0.00621539	2.03429e-05	3.23333e-05		(0,0,2)	-0.003698	-0.07084	0.005584	-0.000119	-0.0859	-0.03347	0.01215
2.3	0	0	0.00106588	0.017811	5.46e-06	2.1e-05	0.00469312	0.00641126	2.10321e-05	3.2629e-05		(3,0,0)	-0.4542	407.9	22.2	50.18	533.2	-181.6	290.3
2.4	0	0	0.00104136	0.0182258	5.07e-06	2.17e-05	0.0047739	0.00661373	2.17293e-05	3.29693e-05		(2,1,0)	0.1847	0.825	-0.3592	-0.134	1.298	730.2	-0.4216
2.5	0	0	0.00101701	0.0186383	4.67e-06	2.24e-05	0.00485736	0.00681885	2.2413e-05	3.33277e-05		(2,0,1)	0.1884	8.315	-0.2359	0.1986	11.49	0.2997	2.178
2.6	0	0	0.00099477	0.0190069	4.27e-06	2.3e-05	0.00494046	0.00700921	2.29928e-05	3.3601e-05		(1,2,0)	0.0001028	-0.008521	-0.0002795	-0.0003487	-0.004898	4.084	0.00455
1.9	0	-4	0.0017642	0.0106009	1.01e-05	1.06e-05	0.00371516	0.00376036	8.83307e-06	4.07173e-05		(1,1,1)	0.00119	0.001737	-0.0009956	0.001483	0.008089	-897.4	-0.01558
2.3	0	-4	0.00145366	0.0134974	8.01e-06	1.32e-05	0.00415798	0.00458367	1.32334e-05	3.32138e-05		(1,0,2)	0.005385	0.07774	-0.01009	-0.003632	0.1029	-0.8808	-0.007321
1.5	0	-2	0.00165653	0.0114731	9.73e-06	1.09e-05	0.0037978	0.00389809	1.01927e-05	3.81854e-05		(0,3,0)	-3.667e-05	6.319e-06	8.79e-05	6.578e-05	-0.0001469	-9.442	-6.724e-05
1.7	0	-2	0.0014822	0.0132875	8.79e-06	1.32e-05	0.00399567	0.00442525	1.31964e-05	3.66694e-05		(0,2,1)	1.316e-05	-0.0001714	-3.092e-05	-2.324e-05	-0.0001964	0.003278	1.76e-05
2.3	0	-2	0.00123614	0.0184547	6.58e-06	2.35e-05	0.00445817	0.00648218	2.34916e-05	3.70432e-05		(0,1,2)	-3.633e-06	1.821e-05	2.237e-05	3.27e-05	8.853e-09	-0.004361	-0.0001482
1.5	0	2	0.00111813	0.0167332	7.42e-06	1.99e-05	0.00428235	0.00576455	1.99044e-05	3.35523e-05		(0,0,3)	2.223e-05	0.0003888	-3.327e-05	1.335e-06	0.0003961	-0.03347	-7.18e-05
1.7	0	2	0.00103634	0.0180433	6.61e-06	2.25e-05	0.00445044	0.00633241	2.24855e-05	3.48321e-05		(4,0,0)	0.4499	-69.86	-5.418	-10.58	-94.07	-88.04	-62.13
1.9	0	2	0.000969241	0.0190971	5.8e-06	2.45e-05	0.00462142	0.00682413	2.4471e-05	3.57793e-05		(3,1,0)	-0.06675	-0.144	0.1476	0.08845	-0.1234	-0.02968	0.1027
2.3	0	2	0.000852969	0.0208658	4.05e-06	2.75e-05	0.00498694	0.00772842	2.75007e-05	3.73134e-05		(3,0,1)	-0.02633	-1.808	0.02691	-0.05041	-2.426	-1.619	-0.7694
2.5	0	2	0.000807588	0.0215157	3.17e-06	2.84e-05	0.0051715	0.00810466	2.83813e-05	3.76156e-05		(2,2,0)	0.0003079	-0.001234	-0.0008197	-0.0008574	-0.00597	-0.003635	-0.001433
2.7	0	2	0.000760091	0.0222178	2.22e-06	2.93e-05	0.00537037	0.00851533	2.93207e-05	3.8061e-05		(2,1,1)	-0.0003553	-0.004362	0.0002149	-0.00061	-0.003688	-6.273e-05	0.005256
2.9	0	2	0.000718822	0.0228187	1.27e-06	3e-05	0.00556981	0.00889155	2.99766e-05	3.82859e-05		(2,0,2)	-0.001846	-0.01822	0.004134	0.002586	-0.029	-0.01384	-0.0003134
1.5	0	4	0.000987904	0.0185089	6.86e-06	2.39e-05	0.00439956	0.00646001	2.38674e-05	3.54798e-05		(1,3,0)	-1.504e-06	2.336e-05	3.534e-06	4.974e-06	8.32e-05	2.782e-05	-2.222e-06
1.7	0	4	0.000911413	0.019607	6.01e-06	2.6e-05	0.00457787	0.00697481	2.59848e-05	3.65226e-05		(1,2,1)	-5.396e-06	0.0001027	1.544e-05	1.404e-05	2.051e-05	-5.492e-05	-3.495e-05
1.9	0	4	0.00084533	0.020508	5.12e-06	2.76e-05	0.00476268	0.00743364	2.75631e-05	3.72482e-05		(1,1,2)	4.734e-06	-3.867e-05	-1.907e-05	-2.389e-05	-1.688e-05	9.169e-06	9.27e-05
2.1	0	4	0.000786531	0.0212795	4.21e-06	2.88e-05	0.00495417	0.00785745	2.87554e-05	3.77352e-05		(1,0,3)	-1.664e-05	-0.0001988	3.154e-05	1.261e-05	-0.0002203	-8.847e-05	3.903e-05
2.3	0	4	0.000732811	0.0219729	3.26e-06	2.97e-05	0.00515276	0.008263	2.96894e-05	3.80799e-05		(0,4,0)	1.946e-07	-1.8e-07	-4.654e-07	-3.57e-07	1.6e-07	2.287e-07	2.769e-07
2.5	0	4	0.000684173	0.0225923	2.29e-06	3.04e-05	0.00535662	0.00864872	3.03834e-05	3.8274e-05		(0,3,1)	-5.135e-09	1.993e-07	1.796e-08	2.36e-08	7.713e-07	2.611e-07	1.273e-07
2.7	0	4	0.000638267	0.0231852	1.28e-06	3.1e-05	0.00556773	0.00903287	3.09575e-05	3.84286e-05		(0,2,2)	-3.665e-08	4.481e-07	7.371e-08	4.449e-08	3.682e-07	-2.393e-07	-8.933e-08
2.9	0	4	0.000590648	0.0238331	2.05e-07	3.16e-05	0.00579284	0.00945177	3.15961e-05	3.8712e-05		(0,1,3)	4.368e-08	-2.226e-07	-1.303e-07	-1.344e-07	-1.671e-07	7.704e-08	4.752e-07
1.5	0	6	0.000881085	0.019716	6.4e-06	2.66e-05	0.0044957	0.00695313	2.66422e-05	3.67567e-05		(0,0,4)	-5.429e-08	-8.634e-07	7.948e-08	-6.739e-09	-7.019e-07	-3.62e-07	8.156e-08
1.7	0	6	0.000808061	0.0206127	5.5e-06	2.82e-05	0.00468329	0.00741241	2.82157e-05	3.73855e-05
1.9	0	6	0.000741566	0.0213994	4.56e-06	2.94e-05	0.00488097	0.00784685	2.94311e-05	3.78431e-05
2.1	0	6	0.000679167	0.0221315	3.56e-06	3.04e-05	0.00508945	0.00827514	3.04282e-05	3.82265e-05
2.3	0	6	0.000622536	0.0227869	2.53e-06	3.12e-05	0.00530494	0.00868462	3.11632e-05	3.84621e-05
2.5	0	6	0.000571617	0.0233723	1.48e-06	3.17e-05	0.00552546	0.00907445	3.16669e-05	3.85451e-05
2.7	0	6	0.000519429	0.0240087	3.61e-07	3.22e-05	0.00576025	0.0094975	3.22238e-05	3.87534e-05
2.9	0	6	0.000474703	0.0245458	-7.58e-07	3.25e-05	0.00599458	0.00988316	3.25042e-05	3.87301e-05
1.3	0	8	0.000871954	0.0196074	6.9e-06	2.68e-05	0.00438971	0.00683601	2.68296e-05	3.68425e-05
1.5	0	8	0.000789387	0.0205424	6e-06	2.85e-05	0.00457822	0.00730783	2.85216e-05	3.7443e-05
1.7	0	8	0.000712017	0.0213909	5.03e-06	2.99e-05	0.00478126	0.00776794	2.98953e-05	3.79795e-05
1.9	0	8	0.000641947	0.0221342	4.02e-06	3.09e-05	0.00499454	0.00820406	3.09077e-05	3.83353e-05
2.1	0	8	0.000580811	0.0227561	2.97e-06	3.15e-05	0.00521338	0.00860383	3.15358e-05	3.84364e-05
2.3	0	8	0.000521788	0.0233746	1.87e-06	3.21e-05	0.00544397	0.00901442	3.20797e-05	3.85524e-05
2.5	0	8	0.000464626	0.0240002	7.15e-07	3.26e-05	0.00568594	0.00943913	3.25705e-05	3.86893e-05
2.7	0	8	0.000415583	0.0245237	-4.43e-07	3.28e-05	0.00592848	0.00982609	3.2771e-05	3.85821e-05
2.9	0	8	0.000365693	0.0250997	-1.66e-06	3.3e-05	0.00618426	0.0102451	3.3038e-05	3.85867e-05
1.5	0	10	0.000703129	0.0212044	5.63e-06	3e-05	0.00465586	0.00760396	2.99961e-05	3.79635e-05
1.7	0	10	0.000626118	0.0219372	4.62e-06	3.1e-05	0.00486887	0.00803469	3.09905e-05	3.82232e-05
1.9	0	10	0.000552942	0.0226397	3.53e-06	3.18e-05	0.005096	0.00847022	3.1808e-05	3.84739e-05
2.1	0	10	0.000484965	0.023296	2.39e-06	3.24e-05	0.00533414	0.00890101	3.24209e-05	3.86341e-05
2.3	0	10	0.000424081	0.0238777	1.23e-06	3.28e-05	0.00557881	0.00931099	3.27778e-05	3.8612e-05
2.5	0	10	0.000365619	0.0244659	6.32e-09	3.31e-05	0.00583445	0.00973368	3.30854e-05	3.86064e-05
2.7	0	10	0.000311576	0.0250249	-1.25e-06	3.33e-05	0.00609697	0.0101513	3.32708e-05	3.85184e-05
2.9	0	10	0.000261727	0.0255576	-2.53e-06	3.34e-05	0.00636516	0.0105631	3.3353e-05	3.83625e-05
2.3	1	-4	0.0017968	0.0103757	1.03e-05	1.06e-05	0.00368445	0.00370918	8.50912e-06	3.95732e-05
1.7	1	-2	0.00167906	0.0113857	9.74e-06	1.09e-05	0.00379488	0.00389322	1.00433e-05	3.9202e-05
2.3	1	-2	0.00129515	0.0163041	6.97e-06	1.86e-05	0.00437673	0.00567624	1.85924e-05	3.46788e-05
1.5	1	0	0.00141397	0.0138474	8.69e-06	1.43e-05	0.0040161	0.0046233	1.42803e-05	3.49745e-05
1.7	1	0	0.00130619	0.0150684	7.93e-06	1.64e-05	0.0041752	0.00512752	1.64439e-05	3.3348e-05
2.3	1	0	0.00105013	0.0183124	5.35e-06	2.22e-05	0.00471487	0.0066062	2.21525e-05	3.46603e-05
2.5	1	0	0.000997568	0.0192461	4.53e-06	2.38e-05	0.00488653	0.00706104	2.37844e-05	3.55244e-05
1.5	1	2	0.00126965	0.0161797	8.07e-06	1.91e-05	0.00414599	0.00548684	1.90556e-05	3.30632e-05
1.7	1	2	0.00107186	0.0175521	6.79e-06	2.14e-05	0.00441421	0.00613588	2.14099e-05	3.43472e-05
2.3	1	2	0.000888858	0.0204616	4.29e-06	2.67e-05	0.00493741	0.00754347	2.66602e-05	3.69079e-05
2.5	1	2	0.000841585	0.0211753	3.41e-06	2.77e-05	0.0051205	0.00793996	2.77165e-05	3.73643e-05
2.7	1	2	0.00079606	0.021865	2.5e-06	2.87e-05	0.0053121	0.00833843	2.86601e-05	3.77914e-05
2.9	1	2	0.000756614	0.0224522	1.58e-06	2.93e-05	0.00550405	0.00870191	2.93205e-05	3.79996e-05
1.5	1	4	0.00138928	0.0174468	8.58e-06	2.26e-05	0.00403832	0.00584087	2.25803e-05	3.37375e-05
1.7	1	4	0.000936395	0.0193233	6.13e-06	2.53e-05	0.00455239	0.0068556	2.5347e-05	3.62277e-05
1.9	1	4	0.000872142	0.0202198	5.27e-06	2.69e-05	0.00473211	0.00730692	2.69303e-05	3.69266e-05
2.1	1	4	0.000811207	0.0210555	4.36e-06	2.83e-05	0.00492308	0.0077519	2.82968e-05	3.75747e-05
2.3	1	4	0.000759122	0.021741	3.43e-06	2.92e-05	0.00511645	0.0081491	2.92363e-05	3.79038e-05
2.5	1	4	0.000707821	0.0224261	2.46e-06	3.01e-05	0.00532115	0.00855907	3.01067e-05	3.82609e-05
2.7	1	4	0.000663277	0.0230103	1.47e-06	3.07e-05	0.00552721	0.00893519	3.06852e-05	3.8402e-05
2.9	1	4	0.000616988	0.0236484	4.24e-07	3.13e-05	0.005747	0.00934535	3.13273e-05	3.86733e-05
1.5	1	6	0.000898359	0.0195476	6.47e-06	2.63e-05	0.00448015	0.00688229	2.62581e-05	3.66249e-05
1.7	1	6	0.000826913	0.0204403	5.59e-06	2.78e-05	0.00466406	0.00733608	2.7835e-05	3.7234e-05
1.9	1	6	0.000757879	0.0212928	4.65e-06	2.92e-05	0.00486237	0.00779378	2.92278e-05	3.78559e-05
2.1	1	6	0.000700921	0.0219474	3.69e-06	3.01e-05	0.00506204	0.00818577	3.0057e-05	3.80477e-05
2.3	1	6	0.000641393	0.022669	2.66e-06	3.1e-05	0.00527892	0.00862023	3.09693e-05	3.84484e-05
2.5	1	6	0.00059164	0.0232471	1.62e-06	3.15e-05	0.00549542	0.0090036	3.14759e-05	3.85197e-05
2.7	1	6	0.00054059	0.0238757	5.24e-07	3.2e-05	0.00572597	0.00941972	3.20357e-05	3.87194e-05
2.9	1	6	0.000496907	0.0244044	-5.74e-07	3.23e-05	0.00595594	0.00979827	3.23185e-05	3.86891e-05
1.3	1	8	0.000888799	0.019421	6.97e-06	2.64e-05	0.00437657	0.00676126	2.63813e-05	3.65813e-05
1.5	1	8	0.00080378	0.0204217	6.07e-06	2.82e-05	0.00456527	0.00725507	2.8249e-05	3.73459e-05
1.7	1	8	0.000727715	0.0212668	5.11e-06	2.96e-05	0.00476524	0.00771066	2.9628e-05	3.78692e-05
1.9	1	8	0.000658871	0.0220055	4.11e-06	3.06e-05	0.00497524	0.00814164	3.06454e-05	3.82131e-05
2.1	1	8	0.000594653	0.0226931	3.05e-06	3.14e-05	0.00519593	0.00856676	3.1449e-05	3.84801e-05
2.3	1	8	0.00053665	0.0233063	1.97e-06	3.2e-05	0.00542346	0.00897266	3.19954e-05	3.85879e-05
2.5	1	8	0.000480454	0.0239258	8.29e-07	3.25e-05	0.0056622	0.00939224	3.24877e-05	3.87171e-05
2.7	1	8	0.000432268	0.0244435	-3.14e-07	3.27e-05	0.00590145	0.00977417	3.26905e-05	3.86054e-05
2.9	1	8	0.000383173	0.0250135	-1.52e-06	3.3e-05	0.00615384	0.0101879	3.29599e-05	3.86067e-05
1.5	1	10	0.000714064	0.0211368	5.68e-06	2.99e-05	0.00464601	0.00757209	2.98542e-05	3.79463e-05
1.7	1	10	0.000638126	0.0218664	4.67e-06	3.09e-05	0.00485662	0.00799928	3.08528e-05	3.81947e-05
1.9	1	10	0.00056599	0.0225644	3.6e-06	3.17e-05	0.00508113	0.00843062	3.16728e-05	3.84358e-05
2.1	1	10	0.000498992	0.0232156	2.48e-06	3.23e-05	0.00531647	0.00885683	3.22878e-05	3.85891e-05
2.3	1	10	0.000438974	0.023792	1.32e-06	3.26e-05	0.00555825	0.00926213	3.26471e-05	3.85628e-05
2.5	1	10	0.000381318	0.0243745	1.19e-07	3.3e-05	0.0058109	0.00967992	3.2957e-05	3.85542e-05
2.7	1	10	0.000327975	0.024928	-1.12e-06	3.31e-05	0.0060704	0.0100927	3.31451e-05	3.84648e-05
2.9	1	10	0.000278759	0.025455	-2.39e-06	3.32e-05	0.00633552	0.0104996	3.32299e-05	3.8308e-05
1.9	2	-2	0.00163247	0.0137567	9.41e-06	1.45e-05	0.00386534	0.0045072	1.44773e-05	3.86934e-05
2.3	2	-2	0.00141898	0.0138287	7.78e-06	1.38e-05	0.00420585	0.00472245	1.37757e-05	3.25353e-05
1.5	2	0	0.00149838	0.0129854	9.05e-06	1.27e-05	0.00394013	0.00429495	1.27282e-05	3.67809e-05
1.7	2	0	0.00136871	0.0144221	8.23e-06	1.52e-05	0.00411143	0.00487086	1.52324e-05	3.47558e-05
2.3	2	0	0.00123491	0.0196585	6.57e-06	2.66e-05	0.00445986	0.00690629	2.66487e-05	3.82386e-05
1.5	2	2	0.00119673	0.0155762	7.75e-06	1.75e-05	0.00421161	0.00532275	1.74597e-05	3.22855e-05
1.7	2	2	0.00110758	0.0170229	6.96e-06	2.03e-05	0.00437779	0.00592717	2.02642e-05	3.3719e-05
2.3	2	2	0.000919253	0.0201044	4.49e-06	2.59e-05	0.00489547	0.00738224	2.59149e-05	3.65629e-05
2.5	2	2	0.000869749	0.0208862	3.62e-06	2.71e-05	0.00507826	0.00780155	2.71493e-05	3.71738e-05
2.7	2	2	0.000825887	0.0215662	2.73e-06	2.81e-05	0.00526378	0.00819009	2.80971e-05	3.75827e-05
2.9	2	2	0.00078387	0.0222208	1.81e-06	2.89e-05	0.00545663	0.00857848	2.89332e-05	3.79533e-05
1.5	2	4	0.00103511	0.0179015	7.06e-06	2.25e-05	0.00435707	0.00621884	2.24897e-05	3.48417e-05
1.7	2	4	0.000956872	0.0190867	6.23e-06	2.48e-05	0.0045315	0.00675682	2.48177e-05	3.60052e-05
2.1	2	4	0.000834656	0.0208109	4.5e-06	2.78e-05	0.00489353	0.00764024	2.77771e-05	3.73104e-05
2.3	2	4	0.000779943	0.0215628	3.57e-06	2.89e-05	0.00508772	0.00806125	2.88927e-05	3.78049e-05
2.5	2	4	0.000729941	0.0222401	2.62e-06	2.98e-05	0.00528797	0.00846381	2.97658e-05	3.81501e-05
2.7	2	4	0.000686586	0.0228163	1.65e-06	3.03e-05	0.00548945	0.00883238	3.03483e-05	3.828e-05
2.9	2	4	0.000641451	0.0234454	6.27e-07	3.1e-05	0.00570444	0.00923436	3.09937e-05	3.85413e-05
1.5	2	6	0.00168246	0.017564	9.84e-06	2.4e-05	0.00377445	0.0056871	2.39888e-05	3.31326e-05
1.7	2	6	0.000841055	0.0203206	5.66e-06	2.76e-05	0.00464964	0.00728241	2.75765e-05	3.7175e-05
1.9	2	6	0.000773257	0.021169	4.73e-06	2.9e-05	0.00484484	0.00773534	2.89725e-05	3.77842e-05
2.1	2	6	0.000713291	0.0218911	3.77e-06	3e-05	0.00504645	0.00815312	2.99788e-05	3.81424e-05
2.3	2	6	0.000658968	0.0225347	2.77e-06	3.07e-05	0.00525466	0.00855109	3.0722e-05	3.83553e-05
2.5	2	6	0.000605925	0.0231815	1.73e-06	3.14e-05	0.00547399	0.00896229	3.14036e-05	3.85933e-05
2.7	2	6	0.000560147	0.0237275	6.76e-07	3.18e-05	0.00569428	0.00933803	3.17938e-05	3.86092e-05
2.9	2	6	0.000512927	0.0243274	-4.41e-07	3.23e-05	0.00592807	0.00974713	3.22504e-05	3.87483e-05
1.3	2	8	0.000901408	0.0192877	7.01e-06	2.61e-05	0.00436673	0.00670757	2.60643e-05	3.64257e-05
1.5	2	8	0.000813649	0.020355	6.11e-06	2.81e-05	0.00455639	0.00722466	2.81069e-05	3.73562e-05
1.7	2	8	0.000738607	0.0211979	5.16e-06	2.95e-05	0.00475413	0.00767719	2.94905e-05	3.78681e-05
1.9	2	8	0.000670718	0.0219333	4.17e-06	3.05e-05	0.00496174	0.00810465	3.05119e-05	3.82015e-05
2.1	2	8	0.000607418	0.0226167	3.13e-06	3.13e-05	0.00517985	0.00852574	3.13183e-05	3.84592e-05
2.3	2	8	0.000550285	0.023225	2.06e-06	3.19e-05	0.00540464	0.00892721	3.18667e-05	3.85599e-05
2.5	2	8	0.000494917	0.0238391	9.32e-07	3.24e-05	0.0056405	0.00934209	3.2361e-05	3.86829e-05
2.7	2	8	0.000442984	0.0244283	-2.31e-07	3.27e-05	0.00588409	0.00975536	3.2736e-05	3.87421e-05
2.9	2	8	0.000399059	0.0249154	-1.39e-06	3.28e-05	0.0061262	0.010128	3.28368e-05	3.85655e-05
1.5	2	10	0.000724393	0.0210573	5.72e-06	2.97e-05	0.00463672	0.00753645	2.96764e-05	3.78716e-05
1.7	2	10	0.000649371	0.021784	4.73e-06	3.07e-05	0.00484516	0.00796029	3.06786e-05	3.81108e-05
1.9	2	10	0.000578122	0.0224779	3.67e-06	3.15e-05	0.0050673	0.00838771	3.1501e-05	3.8344e-05
2.1	2	10	0.000511965	0.0231244	2.56e-06	3.21e-05	0.00530012	0.00880958	3.21177e-05	3.84914e-05
2.3	2	10	0.00044826	0.0237694	1.39e-06	3.27e-05	0.00554544	0.00924371	3.26503e-05	3.86376e-05
2.5	2	10	0.00039122	0.0243484	1.9e-07	3.3e-05	0.00579605	0.00965854	3.29611e-05	3.86253e-05
2.7	2	10	0.00033842	0.0248986	-1.04e-06	3.32e-05	0.00605348	0.0100684	3.31508e-05	3.85338e-05
2.9	2	10	0.000289697	0.0254224	-2.3e-06	3.32e-05	0.00631649	0.0104725	3.32375e-05	3.83757e-05
1.9	3	-2	0.00179723	0.0100739	1.03e-05	1.05e-05	0.00367751	0.00369761	8.03154e-06	3.30668e-05
2.3	3	-2	0.00158208	0.0123028	8.86e-06	1.14e-05	0.00398077	0.00420305	1.1343e-05	3.54004e-05
1.5	3	0	0.00159356	0.0120712	9.46e-06	1.12e-05	0.00385446	0.00399253	1.11687e-05	3.74419e-05
1.7	3	0	0.00143496	0.0137469	8.56e-06	1.4e-05	0.00404386	0.00460529	1.40049e-05	3.59132e-05
2.3	3	0	0.00123099	0.0189544	6.54e-06	2.48e-05	0.00446527	0.00666281	2.47512e-05	3.75662e-05
1.5	3	2	0.00128768	0.015213	8.15e-06	1.69e-05	0.00412976	0.00514915	1.68945e-05	3.2112e-05
1.7	3	2	0.00125553	0.0163779	7.68e-06	1.93e-05	0.00422687	0.00560658	1.92523e-05	3.28634e-05
1.9	3	2	0.00106097	0.0178567	6.3e-06	2.18e-05	0.00451686	0.00631159	2.17759e-05	3.45123e-05
2.1	3	2	0.000997779	0.0189155	5.48e-06	2.37e-05	0.004688	0.00680532	2.37418e-05	3.55185e-05
2.3	3	2	0.000944571	0.0197867	4.66e-06	2.52e-05	0.00486053	0.00724121	2.52469e-05	3.62343e-05
2.5	3	2	0.000896373	0.0205646	3.81e-06	2.65e-05	0.00503832	0.00765331	2.64904e-05	3.68239e-05
1.5	3	4	0.0010547	0.0176273	7.14e-06	2.19e-05	0.00433944	0.00611161	2.18721e-05	3.45031e-05
1.7	3	4	0.000976855	0.0188226	6.32e-06	2.42e-05	0.00451112	0.00664896	2.4219e-05	3.56483e-05
2.1	3	4	0.000849061	0.0206872	4.59e-06	2.75e-05	0.00487538	0.00758163	2.753e-05	3.7278e-05
2.3	3	4	0.000795418	0.0214345	3.67e-06	2.86e-05	0.00506636	0.00799766	2.86486e-05	3.77608e-05
2.5	3	4	0.000746433	0.022106	2.73e-06	2.95e-05	0.00526323	0.00839469	2.95239e-05	3.80966e-05
2.7	3	4	0.000703998	0.0226761	1.79e-06	3.01e-05	0.00546124	0.00875761	3.01092e-05	3.82171e-05
2.9	3	4	0.000659755	0.0232985	7.79e-07	3.08e-05	0.00567259	0.00915351	3.07571e-05	3.84704e-05
1.5	3	6	0.0009275	0.0192237	6.6e-06	2.55e-05	0.00445392	0.00674923	2.55088e-05	3.62562e-05
1.7	3	6	0.000854504	0.0201812	5.73e-06	2.73e-05	0.00463592	0.0072223	2.7262e-05	3.70144e-05
1.9	3	6	0.000787738	0.0210259	4.81e-06	2.87e-05	0.00482833	0.0076707	2.86598e-05	3.76142e-05
2.1	3	6	0.000728715	0.0217434	3.86e-06	2.97e-05	0.00502702	0.00808356	2.96688e-05	3.79643e-05
2.3	3	6	0.00067108	0.0224556	2.85e-06	3.06e-05	0.00523795	0.00850859	3.0588e-05	3.83468e-05
2.5	3	6	0.000618797	0.0230979	1.82e-06	3.13e-05	0.00545468	0.00891564	3.12719e-05	3.85771e-05
2.7	3	6	0.000573737	0.0236388	7.81e-07	3.17e-05	0.00567227	0.009287	3.16639e-05	3.85868e-05
2.9	3	6	0.00052721	0.0242333	-3.22e-07	3.21e-05	0.00590322	0.00969139	3.2122e-05	3.87207e-05
1.3	3	8	0.000909857	0.0192065	7.05e-06	2.59e-05	0.00436014	0.00667445	2.58744e-05	3.63669e-05
1.5	3	8	0.000822973	0.0202726	6.15e-06	2.79e-05	0.004548	0.00718909	2.79194e-05	3.72859e-05
1.7	3	8	0.00074877	0.0211133	5.21e-06	2.93e-05	0.00474377	0.0076387	2.93062e-05	3.77895e-05
1.9	3	8	0.000681662	0.0218458	4.23e-06	3.03e-05	0.00494926	0.00806282	3.03306e-05	3.81149e-05
2.1	3	8	0.000619109	0.0225254	3.2e-06	3.11e-05	0.00516512	0.00848017	3.11395e-05	3.83655e-05
2.3	3	8	0.000558376	0.0232028	2.11e-06	3.19e-05	0.00539348	0.00891029	3.18619e-05	3.86375e-05
2.5	3	8	0.000507999	0.0237383	1.03e-06	3.22e-05	0.00562088	0.00928804	3.21856e-05	3.8579e-05
2.7	3	8	0.000456683	0.0243225	-1.25e-07	3.26e-05	0.00586189	0.00969684	3.25626e-05	3.86354e-05
2.9	3	8	0.00040877	0.0248835	-1.31e-06	3.28e-05	0.0061093	0.0101029	3.28353e-05	3.86312e-05
1.5	3	10	0.000734132	0.020965	5.77e-06	2.95e-05	0.00462795	0.00749666	2.946e-05	3.77336e-05
1.7	3	10	0.000655743	0.021758	4.76e-06	3.06e-05	0.00483866	0.00794577	3.06382e-05	3.81444e-05
1.9	3	10	0.000585111	0.0224496	3.71e-06	3.15e-05	0.00505933	0.00837102	3.14622e-05	3.83712e-05
2.1	3	10	0.000519542	0.0230933	2.6e-06	3.21e-05	0.00529057	0.00879049	3.20801e-05	3.85134e-05
2.3	3	10	0.000456376	0.0237355	1.44e-06	3.26e-05	0.00553424	0.00922207	3.26139e-05	3.86563e-05
2.5	3	10	0.000399831	0.0243114	2.51e-07	3.29e-05	0.00578313	0.00963427	3.29259e-05	3.86414e-05
2.7	3	10	0.000347465	0.0248585	-9.69e-07	3.31e-05	0.00603883	0.0100415	3.31169e-05	3.85484e-05
2.9	3	10	0.000299136	0.0253792	-2.22e-06	3.32e-05	0.00630007	0.0104429	3.32047e-05	3.83891e-05
2.3	4	-2	0.00175043	0.0108712	9.97e-06	1.07e-05	0.00374844	0.00381583	9.23333e-06	3.87344e-05
1.5	4	0	0.00167312	0.0113106	9.8e-06	1.08e-05	0.00378287	0.0038732	9.9328e-06	3.83626e-05
1.7	4	0	0.00149105	0.0131759	8.83e-06	1.3e-05	0.00398664	0.00438322	1.29965e-05	3.70505e-05
2.3	4	0	0.00123639	0.0183878	6.58e-06	2.33e-05	0.00445782	0.00645846	2.33231e-05	3.70475e-05
1.5	4	2	0.00125495	0.0151236	8e-06	1.66e-05	0.00415921	0.00513668	1.66108e-05	3.31682e-05
1.7	4	2	0.00125602	0.0161273	7.68e-06	1.87e-05	0.00422637	0.00552045	1.86691e-05	3.26431e-05
1.9	4	2	0.00108077	0.0175643	6.4e-06	2.11e-05	0.00449427	0.00619335	2.11493e-05	3.41839e-05
2.3	4	2	0.000961276	0.019579	4.77e-06	2.48e-05	0.00483748	0.00714923	2.48138e-05	3.60578e-05
2.5	4	2	0.000913888	0.0203555	3.93e-06	2.61e-05	0.00501205	0.00755708	2.60654e-05	3.66312e-05
1.5	4	4	0.00106651	0.0174694	7.19e-06	2.15e-05	0.00432881	0.00604968	2.15213e-05	3.43615e-05
1.7	4	4	0.000988851	0.0186722	6.38e-06	2.39e-05	0.00449889	0.00658725	2.38829e-05	3.54941e-05
2.1	4	4	0.000862536	0.0205354	4.67e-06	2.72e-05	0.0048584	0.00751368	2.72033e-05	3.7098e-05
2.3	4	4	0.000809719	0.0212785	3.77e-06	2.83e-05	0.00504663	0.00792507	2.83235e-05	3.75732e-05
2.5	4	4	0.00076153	0.0219446	2.84e-06	2.92e-05	0.00524058	0.0083169	2.91995e-05	3.79029e-05
2.7	4	4	0.000715603	0.0225863	1.88e-06	3e-05	0.00544244	0.0087093	2.99596e-05	3.81948e-05
2.9	4	4	0.000671976	0.0232042	8.81e-07	3.06e-05	0.00565132	0.00910112	3.0609e-05	3.84418e-05
1.5	4	6	0.000935742	0.0191339	6.63e-06	2.53e-05	0.0044465	0.00671233	2.5303e-05	3.61723e-05
1.7	4	6	0.000859529	0.0201606	5.75e-06	2.72e-05	0.00463079	0.00721114	2.72298e-05	3.71003e-05
1.9	4	6	0.000797365	0.0209325	4.86e-06	2.85e-05	0.00481736	0.00762846	2.84573e-05	3.75132e-05
2.1	4	6	0.000734891	0.0217195	3.9e-06	2.96e-05	0.00501923	0.00806885	2.9641e-05	3.80354e-05
2.3	4	6	0.000681969	0.0223558	2.93e-06	3.04e-05	0.00522292	0.0084596	3.03897e-05	3.82349e-05
2.5	4	6	0.000630258	0.022994	1.9e-06	3.11e-05	0.00543749	0.00886283	3.1075e-05	3.846e-05
2.7	4	6	0.000581397	0.0236076	8.4e-07	3.16e-05	0.00565986	0.0092656	3.16407e-05	3.86416e-05
2.9	4	6	0.000535322	0.024199	-2.55e-07	3.21e-05	0.0058891	0.00966741	3.20997e-05	3.87715e-05
1.3	4	8	0.000914205	0.0191763	7.06e-06	2.58e-05	0.00435675	0.00666146	2.58082e-05	3.6397e-05
1.5	4	8	0.00083178	0.0201733	6.19e-06	2.77e-05	0.00454007	0.0071479	2.76835e-05	3.71272e-05
1.7	4	8	0.000754209	0.0210815	5.24e-06	2.92e-05	0.00473822	0.00762296	2.92448e-05	3.78044e-05
1.9	4	8	0.0006876	0.0218124	4.26e-06	3.03e-05	0.00494249	0.00804535	3.02714e-05	3.81243e-05
2.1	4	8	0.000625523	0.02249	3.24e-06	3.11e-05	0.00515704	0.00846071	3.10819e-05	3.83698e-05
2.3	4	8	0.000569558	0.0230914	2.19e-06	3.16e-05	0.00537805	0.00885592	3.16335e-05	3.84611e-05
2.5	4	8	0.0005153	0.0236978	1.08e-06	3.21e-05	0.00560993	0.00926402	3.21301e-05	3.85753e-05
2.7	4	8	0.000464385	0.0242792	-6.51e-08	3.25e-05	0.00584942	0.0096704	3.25082e-05	3.86297e-05
2.9	4	8	0.000416837	0.0248371	-1.24e-06	3.28e-05	0.00609527	0.0100739	3.27818e-05	3.86236e-05
1.5	4	10	0.000739295	0.020927	5.79e-06	2.94e-05	0.00462331	0.00747951	2.93763e-05	3.7707e-05
1.7	4	10	0.000661383	0.0217187	4.79e-06	3.06e-05	0.0048329	0.00792698	3.05566e-05	3.81128e-05
1.9	4	10	0.00059121	0.0224083	3.74e-06	3.14e-05	0.00505238	0.00835029	3.13819e-05	3.83352e-05
2.1	4	10	0.000526077	0.0230496	2.64e-06	3.2e-05	0.00528234	0.00876759	3.20007e-05	3.8474e-05
2.3	4	10	0.00046331	0.0236892	1.49e-06	3.25e-05	0.00552467	0.00919691	3.25355e-05	3.86149e-05
2.5	4	10	0.000407131	0.0242625	3.04e-07	3.28e-05	0.00577218	0.00960677	3.28486e-05	3.85985e-05
2.7	4	10	0.000355084	0.024807	-9.11e-07	3.3e-05	0.00602649	0.0100117	3.30409e-05	3.85048e-05
2.9	4	10	0.000302431	0.0254042	-2.19e-06	3.33e-05	0.00629433	0.0104491	3.32984e-05	3.85178e-05
2.3	5	-2	0.00181632	0.0101039	1.04e-05	1.05e-05	0.00365751	0.00366428	8.10891e-06	3.98334e-05
1.5	5	0	0.00171617	0.0108711	9.99e-06	1.07e-05	0.00374412	0.00380862	9.24047e-06	3.87725e-05
1.7	5	0	0.00152797	0.012823	9.01e-06	1.24e-05	0.00394898	0.00424592	1.23922e-05	3.72795e-05
2.3	5	0	0.0012436	0.0180045	6.63e-06	2.24e-05	0.00444787	0.00631706	2.23989e-05	3.66486e-05
2.5	5	0	0.00113827	0.0170681	5.54e-06	1.94e-05	0.00467547	0.0061329	1.93713e-05	3.32224e-05
1.5	5	2	0.00131401	0.0149197	8.26e-06	1.63e-05	0.00410606	0.0050357	1.6317e-05	3.29677e-05
1.7	5	2	0.00125816	0.0159639	7.69e-06	1.83e-05	0.00422419	0.00546315	1.82997e-05	3.24694e-05
1.9	5	2	0.00109268	0.017382	6.47e-06	2.08e-05	0.0044807	0.00612021	2.07605e-05	3.3956e-05
2.3	5	2	0.000973478	0.0194026	4.85e-06	2.44e-05	0.00482064	0.00707321	2.44365e-05	3.58168e-05
1.5	5	4	0.00107438	0.0173553	7.23e-06	2.13e-05	0.00432173	0.00600543	2.12671e-05	3.42161e-05
1.7	5	4	0.00137203	0.0175818	8.25e-06	2.27e-05	0.00410804	0.00593562	2.26515e-05	3.36358e-05
2.1	5	4	0.000867305	0.0204987	4.7e-06	2.71e-05	0.00485239	0.00749589	2.7133e-05	3.71132e-05
2.3	5	4	0.000814872	0.0212403	3.8e-06	2.83e-05	0.00503951	0.00790565	2.82544e-05	3.75835e-05
2.5	5	4	0.000767057	0.0219044	2.88e-06	2.91e-05	0.00523229	0.00829563	2.91312e-05	3.79093e-05
2.7	5	4	0.000721474	0.0225441	1.92e-06	2.99e-05	0.00543293	0.00868611	2.98923e-05	3.81975e-05
2.9	5	4	0.000678173	0.0231598	9.32e-07	3.05e-05	0.00564054	0.00907589	3.05427e-05	3.84415e-05
1.5	5	6	0.000939864	0.0190908	6.65e-06	2.52e-05	0.00444279	0.00669452	2.5205e-05	3.61414e-05
1.7	5	6	0.000867896	0.0200468	5.79e-06	2.7e-05	0.00462226	0.00716413	2.69617e-05	3.68834e-05
1.9	5	6	0.000802206	0.0208876	4.89e-06	2.84e-05	0.00481184	0.00760801	2.83613e-05	3.74726e-05
2.1	5	6	0.000740077	0.0216731	3.93e-06	2.95e-05	0.0050127	0.00804675	2.9546e-05	3.7992e-05
2.3	5	6	0.000687472	0.0223077	2.96e-06	3.03e-05	0.00521533	0.00843573	3.02957e-05	3.81883e-05
2.5	5	6	0.000636061	0.0229438	1.94e-06	3.1e-05	0.00542879	0.00883704	3.09818e-05	3.84105e-05
2.7	5	6	0.00058749	0.0235551	8.87e-07	3.15e-05	0.00564999	0.00923777	3.15483e-05	3.85898e-05
2.9	5	6	0.00054169	0.0241442	-2.02e-07	3.2e-05	0.00587802	0.00963749	3.20084e-05	3.87181e-05
1.3	5	8	0.000918283	0.0191285	7.08e-06	2.57e-05	0.00435357	0.00664251	2.56937e-05	3.63293e-05
1.5	5	8	0.000832297	0.0201936	6.19e-06	2.77e-05	0.00453961	0.00715477	2.77416e-05	3.72353e-05
1.7	5	8	0.000758969	0.0210322	5.26e-06	2.91e-05	0.00473336	0.00760144	2.91316e-05	3.77298e-05
1.9	5	8	0.000692673	0.0217617	4.29e-06	3.02e-05	0.00493671	0.00802225	3.01593e-05	3.8047e-05
2.1	5	8	0.000630894	0.0224375	3.27e-06	3.1e-05	0.00515027	0.00843585	3.09707e-05	3.82897e-05
2.3	5	8	0.000570911	0.0231106	2.19e-06	3.17e-05	0.00537618	0.00886187	3.16954e-05	3.85559e-05
2.5	5	8	0.000516838	0.0237164	1.09e-06	3.22e-05	0.00560762	0.00926961	3.21923e-05	3.86682e-05
2.7	5	8	0.000466095	0.0242973	-5.19e-08	3.26e-05	0.00584665	0.00967557	3.25704e-05	3.87205e-05
2.9	5	8	0.000418708	0.0248547	-1.22e-06	3.28e-05	0.00609201	0.0100787	3.28442e-05	3.8713e-05
1.5	5	10	0.000739907	0.0209431	5.79e-06	2.94e-05	0.00462276	0.00748482	2.94241e-05	3.77887e-05
1.7	5	10	0.000662189	0.0217345	4.79e-06	3.06e-05	0.00483208	0.00793211	3.06052e-05	3.81912e-05
1.9	5	10	0.000592199	0.0224238	3.75e-06	3.14e-05	0.00505125	0.00835519	3.1431e-05	3.8411e-05
2.1	5	10	0.000527242	0.0230647	2.65e-06	3.21e-05	0.00528087	0.00877221	3.20501e-05	3.85476e-05
2.3	5	10	0.000469056	0.0236303	1.52e-06	3.24e-05	0.00551674	0.00916805	3.24138e-05	3.85108e-05
2.5	5	10	0.000408613	0.0242767	3.14e-07	3.29e-05	0.00576996	0.00961072	3.28981e-05	3.86689e-05
2.7	5	10	0.000356704	0.0248208	-8.98e-07	3.31e-05	0.00602386	0.0100153	3.30906e-05	3.85743e-05
2.9	5	10	0.000308789	0.0253383	-2.14e-06	3.32e-05	0.00628327	0.0104141	3.31798e-05	3.84137e-05
1.5	6	0	0.00171679	0.0108459	9.99e-06	1.07e-05	0.00374356	0.00380769	9.1985e-06	3.87241e-05
1.7	6	0	0.00153458	0.0127714	9.04e-06	1.23e-05	0.00394225	0.00422529	1.23075e-05	3.74029e-05
2.3	6	0	0.0012457	0.0179228	6.64e-06	2.22e-05	0.00444498	0.00628642	2.22069e-05	3.65249e-05
1.5	6	2	0.00131384	0.0149078	8.26e-06	1.63e-05	0.00410621	0.00503178	1.62906e-05	3.29403e-05
1.7	6	2	0.00125777	0.0159696	7.69e-06	1.83e-05	0.00422459	0.00546536	1.83115e-05	3.25085e-05
1.9	6	2	0.00109269	0.0173871	6.47e-06	2.08e-05	0.00448069	0.00612199	2.07727e-05	3.39913e-05
2.3	6	2	0.000973537	0.0194083	4.85e-06	2.45e-05	0.00482056	0.0070752	2.4451e-05	3.58496e-05
2.5	6	2	0.000922704	0.0202606	4e-06	2.59e-05	0.00499882	0.0075126	2.58785e-05	3.65927e-05
1.5	6	4	0.00107439	0.0173589	7.23e-06	2.13e-05	0.00432172	0.00600666	2.12759e-05	3.42403e-05
1.7	6	4	0.00137117	0.0175888	8.24e-06	2.27e-05	0.00410892	0.00593858	2.26659e-05	3.36651e-05
2.1	6	4	0.000867394	0.0205027	4.7e-06	2.71e-05	0.00485228	0.00749725	2.71439e-05	3.71344e-05
2.3	6	4	0.000814992	0.0212442	3.8e-06	2.83e-05	0.00503935	0.00790698	2.82655e-05	3.76039e-05
2.5	6	4	0.000767209	0.0219083	2.88e-06	2.91e-05	0.00523207	0.00829694	2.91426e-05	3.79295e-05
2.7	6	4	0.000721654	0.0225479	1.92e-06	2.99e-05	0.00543264	0.00868735	2.99037e-05	3.82171e-05
2.9	6	4	0.000678381	0.0231635	9.34e-07	3.06e-05	0.00564018	0.00907708	3.05542e-05	3.84606e-05
1.5	6	6	0.000939898	0.0190937	6.65e-06	2.52e-05	0.00444276	0.0066955	2.52127e-05	3.61577e-05
1.7	6	6	0.000867958	0.0200497	5.79e-06	2.7e-05	0.0046222	0.00716513	2.69699e-05	3.6899e-05
1.9	6	6	0.000802296	0.0208905	4.89e-06	2.84e-05	0.00481174	0.00760898	2.83696e-05	3.74876e-05
2.1	6	6	0.000740195	0.0216759	3.93e-06	2.96e-05	0.00501255	0.00804769	2.95544e-05	3.80064e-05
2.3	6	6	0.000687614	0.0223105	2.96e-06	3.03e-05	0.00521513	0.00843665	3.03043e-05	3.82025e-05
2.5	6	6	0.000636226	0.0229466	1.94e-06	3.1e-05	0.00542854	0.00883792	3.09905e-05	3.84244e-05
2.7	6	6	0.000587679	0.0235578	8.88e-07	3.16e-05	0.00564968	0.00923861	3.15571e-05	3.86035e-05
2.9	6	6	0.000541901	0.0241468	-2e-07	3.2e-05	0.00587765	0.00963827	3.20171e-05	3.87314e-05
1.3	6	8	0.000918313	0.0191307	7.08e-06	2.57e-05	0.00435355	0.00664327	2.56998e-05	3.63417e-05
1.5	6	8	0.000832353	0.0201958	6.19e-06	2.77e-05	0.00453955	0.0071555	2.77478e-05	3.7247e-05
1.7	6	8	0.000759049	0.0210344	5.26e-06	2.91e-05	0.00473328	0.00760217	2.91381e-05	3.77411e-05
1.9	6	8	0.000692776	0.0217639	4.29e-06	3.02e-05	0.00493659	0.00802296	3.01659e-05	3.80579e-05
2.1	6	8	0.000631019	0.0224397	3.27e-06	3.1e-05	0.00515011	0.00843655	3.09775e-05	3.83004e-05
2.3	6	8	0.000571057	0.0231127	2.2e-06	3.17e-05	0.00537598	0.00886253	3.17022e-05	3.85664e-05
2.5	6	8	0.000517004	0.0237185	1.09e-06	3.22e-05	0.00560737	0.00927021	3.2199e-05	3.86782e-05
2.7	6	8	0.00046628	0.0242992	-5.05e-08	3.26e-05	0.00584635	0.00967614	3.25772e-05	3.87304e-05
2.9	6	8	0.00041891	0.0248566	-1.22e-06	3.29e-05	0.00609166	0.0100792	3.28509e-05	3.87227e-05
1.5	6	10	0.000739973	0.0209448	5.79e-06	2.94e-05	0.0046227	0.00748539	2.94292e-05	3.77974e-05
1.7	6	10	0.000662276	0.0217362	4.79e-06	3.06e-05	0.00483199	0.00793267	3.06105e-05	3.81998e-05
1.9	6	10	0.000592306	0.0224255	3.75e-06	3.14e-05	0.00505113	0.00835572	3.14363e-05	3.84192e-05
2.1	6	10	0.000527368	0.0230663	2.65e-06	3.21e-05	0.00528071	0.00877271	3.20554e-05	3.85555e-05
2.3	6	10	0.000469199	0.0236319	1.52e-06	3.24e-05	0.00551654	0.00916852	3.24192e-05	3.85187e-05
2.5	6	10	0.000408774	0.0242782	3.15e-07	3.29e-05	0.00576972	0.00961115	3.29035e-05	3.86766e-05
2.7	6	10	0.000356879	0.0248223	-8.97e-07	3.31e-05	0.00602358	0.0100157	3.3096e-05	3.85818e-05
2.9	6	10	0.000308978	0.0253397	-2.13e-06	3.32e-05	0.00628294	0.0104144	3.31852e-05	3.84212e-05
2.3	7	-2	0.00177778	0.0105984	1.01e-05	1.06e-05	0.0037107	0.00375294	8.83602e-06	3.92616e-05
1.5	7	0	0.0016897	0.0111561	9.87e-06	1.08e-05	0.00376794	0.00384832	9.68934e-06	3.8562e-05
1.7	7	0	0.0015044	0.0130578	8.89e-06	1.28e-05	0.00397302	0.00433661	1.27954e-05	3.72542e-05
2.3	7	0	0.00124418	0.0180636	6.63e-06	2.25e-05	0.00444707	0.00633725	2.25492e-05	3.64995e-05
1.5	7	2	0.00130482	0.0149965	8.22e-06	1.65e-05	0.00411433	0.00506661	1.64616e-05	3.26647e-05
1.7	7	2	0.00125666	0.0160728	7.69e-06	1.85e-05	0.00422572	0.00550139	1.85453e-05	3.25815e-05
1.9	7	2	0.00108474	0.0175031	6.43e-06	2.1e-05	0.00448976	0.00616879	2.10183e-05	3.4104e-05
2.3	7	2	0.000965343	0.0195197	4.79e-06	2.47e-05	0.00483187	0.00712368	2.46865e-05	3.59737e-05
1.5	7	4	0.00107043	0.0174066	7.21e-06	2.14e-05	0.00432529	0.00602556	2.13798e-05	3.42494e-05
1.7	7	4	0.000988938	0.0186837	6.38e-06	2.39e-05	0.0044988	0.00659123	2.39126e-05	3.55623e-05
2.1	7	4	0.000862807	0.0205471	4.67e-06	2.72e-05	0.00485806	0.00751771	2.72358e-05	3.71607e-05
2.3	7	4	0.000810084	0.02129	3.77e-06	2.84e-05	0.00504612	0.007929	2.83565e-05	3.76339e-05
2.5	7	4	0.000761987	0.021956	2.84e-06	2.92e-05	0.0052399	0.00832073	2.92331e-05	3.79622e-05
2.7	7	4	0.000716145	0.0225976	1.88e-06	3e-05	0.00544157	0.00871299	2.99935e-05	3.82525e-05
2.9	7	4	0.0006726	0.0232152	8.86e-07	3.06e-05	0.00565024	0.00910465	3.06432e-05	3.84985e-05
1.5	7	6	0.000939652	0.0190728	6.65e-06	2.52e-05	0.00444298	0.00668832	2.51565e-05	3.60394e-05
1.7	7	6	0.000863613	0.020099	5.77e-06	2.71e-05	0.00462663	0.00718602	2.70825e-05	3.69664e-05
1.9	7	6	0.000797638	0.020941	4.86e-06	2.85e-05	0.00481705	0.00763134	2.8482e-05	3.75579e-05
2.1	7	6	0.000739343	0.0216554	3.93e-06	2.95e-05	0.00501362	0.00804087	2.94933e-05	3.79009e-05
2.3	7	6	0.000682397	0.0223641	2.93e-06	3.04e-05	0.00522233	0.00846228	3.0415e-05	3.82768e-05
2.5	7	6	0.000630756	0.0230021	1.91e-06	3.11e-05	0.00543675	0.0088654	3.11006e-05	3.8501e-05
2.7	7	6	0.000581964	0.0236155	8.44e-07	3.17e-05	0.00565894	0.00926805	3.16665e-05	3.86818e-05
2.9	7	6	0.000540373	0.0241279	-2.13e-07	3.2e-05	0.00588031	0.00963264	3.1954e-05	3.86354e-05
1.3	7	8	0.000918094	0.0191148	7.08e-06	2.57e-05	0.00435372	0.00663785	2.56562e-05	3.62524e-05
1.5	7	8	0.000831948	0.0201798	6.19e-06	2.77e-05	0.00453992	0.00715011	2.77022e-05	3.7162e-05
1.7	7	8	0.000758467	0.0210185	5.26e-06	2.91e-05	0.00473388	0.00759688	2.90912e-05	3.76593e-05
1.9	7	8	0.00068791	0.0218189	4.27e-06	3.03e-05	0.00494214	0.00804746	3.02911e-05	3.81568e-05
2.1	7	8	0.000625899	0.0224963	3.24e-06	3.11e-05	0.00515656	0.00846274	3.11018e-05	3.84011e-05
2.3	7	8	0.000569996	0.0230976	2.19e-06	3.17e-05	0.00537744	0.00885784	3.16535e-05	3.84917e-05
2.5	7	8	0.000515798	0.0237038	1.08e-06	3.22e-05	0.00560918	0.00926583	3.21502e-05	3.86054e-05
2.7	7	8	0.000464938	0.024285	-6.09e-08	3.25e-05	0.00584852	0.00967207	3.25283e-05	3.8659e-05
2.9	7	8	0.000417442	0.0248428	-1.23e-06	3.28e-05	0.00609421	0.0100754	3.28019e-05	3.86524e-05
1.5	7	10	0.000739493	0.0209322	5.79e-06	2.94e-05	0.00462313	0.00748122	2.93917e-05	3.77333e-05
1.7	7	10	0.000661644	0.0217237	4.79e-06	3.06e-05	0.00483264	0.00792863	3.05722e-05	3.8138e-05
1.9	7	10	0.00059153	0.0224133	3.74e-06	3.14e-05	0.00505201	0.00835186	3.13977e-05	3.83596e-05
2.1	7	10	0.000526454	0.0230545	2.64e-06	3.2e-05	0.00528187	0.00876908	3.20166e-05	3.84977e-05
2.3	7	10	0.00046374	0.023694	1.49e-06	3.26e-05	0.00552408	0.00919831	3.25516e-05	3.86382e-05
2.5	7	10	0.00040761	0.0242671	3.07e-07	3.29e-05	0.00577146	0.00960804	3.28645e-05	3.86211e-05
2.7	7	10	0.000355608	0.0248114	-9.06e-07	3.31e-05	0.00602564	0.0100129	3.30569e-05	3.85272e-05
2.9	7	10	0.000302997	0.0254085	-2.18e-06	3.33e-05	0.00629335	0.0104502	3.33144e-05	3.85399e-05
1.9	8	-2	0.00181749	0.009577	1.04e-05	1.05e-05	0.00365441	0.00365912	7.28936e-06	3.24125e-05
2.3	8	-2	0.00162997	0.0119234	9.17e-06	1.12e-05	0.00391468	0.00409289	1.07802e-05	3.62999e-05
1.5	8	0	0.00161644	0.0118607	9.56e-06	1.1e-05	0.00383388	0.00395823	1.08226e-05	3.7736e-05
1.7	8	0	0.00145204	0.0135864	8.64e-06	1.37e-05	0.00402643	0.00454189	1.3722e-05	3.621e-05
2.3	8	0	0.00123139	0.01882	6.55e-06	2.44e-05	0.00446472	0.00661517	2.44037e-05	3.74642e-05
1.5	8	2	0.00129231	0.0151652	8.17e-06	1.68e-05	0.00412559	0.00513043	1.68007e-05	3.22937e-05
1.7	8	2	0.00125471	0.0163376	7.68e-06	1.92e-05	0.00422771	0.00559331	1.91548e-05	3.28737e-05
1.9	8	2	0.00106885	0.0177298	6.34e-06	2.15e-05	0.00450787	0.00626076	2.15002e-05	3.43112e-05
2.3	8	2	0.00139379	0.0212058	7.62e-06	3.22e-05	0.00424061	0.00727075	3.21989e-05	3.93964e-05
2.5	8	2	0.000900837	0.0205153	3.84e-06	2.64e-05	0.00503162	0.00763025	2.63923e-05	3.67913e-05
1.5	8	4	0.00105863	0.0175717	7.16e-06	2.17e-05	0.00433591	0.00608994	2.17476e-05	3.44349e-05
1.7	8	4	0.000980833	0.0187693	6.34e-06	2.41e-05	0.00450706	0.00662726	2.40985e-05	3.55769e-05
2.1	8	4	0.000853488	0.0206332	4.61e-06	2.74e-05	0.0048698	0.00755776	2.74115e-05	3.71995e-05
2.3	8	4	0.000800093	0.0213791	3.7e-06	2.85e-05	0.00505991	0.00797229	2.85306e-05	3.76805e-05
2.5	8	4	0.000751346	0.0220489	2.77e-06	2.94e-05	0.00525586	0.00836761	2.9406e-05	3.80147e-05
2.7	8	4	0.000704908	0.0226943	1.8e-06	3.02e-05	0.00545977	0.00876356	3.01645e-05	3.83106e-05
2.9	8	4	0.000665089	0.0232375	8.23e-07	3.06e-05	0.00566331	0.00912285	3.06402e-05	3.83853e-05
1.5	8	6	0.000931492	0.0191681	6.61e-06	2.54e-05	0.00445033	0.00672711	2.5377e-05	3.61538e-05
1.7	8	6	0.000854827	0.0201953	5.73e-06	2.73e-05	0.00463559	0.00722709	2.73015e-05	3.70896e-05
1.9	8	6	0.000788202	0.0210398	4.81e-06	2.87e-05	0.00482781	0.00767539	2.87003e-05	3.7687e-05
2.1	8	6	0.000729308	0.0217571	3.86e-06	2.97e-05	0.00502627	0.00808812	2.971e-05	3.80347e-05
2.3	8	6	0.000675991	0.0223953	2.89e-06	3.05e-05	0.00523117	0.0084807	3.0457e-05	3.82382e-05
2.5	8	6	0.000623905	0.0230358	1.86e-06	3.11e-05	0.00544702	0.008886	3.11414e-05	3.84674e-05
2.7	8	6	0.000574681	0.0236518	7.88e-07	3.17e-05	0.00567074	0.00929095	3.1706e-05	3.8652e-05
2.9	8	6	0.000528262	0.0242458	-3.13e-07	3.22e-05	0.00590139	0.00969508	3.21642e-05	3.87846e-05
1.3	8	8	0.000910015	0.0192172	7.05e-06	2.59e-05	0.00436002	0.00667809	2.59039e-05	3.64268e-05
1.5	8	8	0.000827168	0.0202147	6.17e-06	2.78e-05	0.00454422	0.00716572	2.77779e-05	3.71629e-05
1.7	8	8	0.000749177	0.021124	5.22e-06	2.93e-05	0.00474335	0.00764225	2.93379e-05	3.78444e-05
1.9	8	8	0.000682181	0.0218564	4.24e-06	3.04e-05	0.00494867	0.00806627	3.03629e-05	3.8168e-05
2.1	8	8	0.000619737	0.0225358	3.21e-06	3.12e-05	0.00516433	0.00848347	3.11721e-05	3.84169e-05
2.3	8	8	0.00056342	0.0231394	2.14e-06	3.17e-05	0.00538652	0.00888071	3.17228e-05	3.8511e-05
2.5	8	8	0.000508827	0.0237483	1.03e-06	3.22e-05	0.00561964	0.00929099	3.22187e-05	3.8628e-05
2.7	8	8	0.000457604	0.0243321	-1.18e-07	3.26e-05	0.0058604	0.00969957	3.25957e-05	3.86835e-05
2.9	8	8	0.000409776	0.0248927	-1.3e-06	3.29e-05	0.00610755	0.0101054	3.28684e-05	3.86785e-05
1.5	8	10	0.000734464	0.0209736	5.77e-06	2.95e-05	0.00462765	0.00749948	2.94855e-05	3.7777e-05
1.7	8	10	0.000656178	0.0217664	4.76e-06	3.07e-05	0.00483821	0.00794849	3.06641e-05	3.81859e-05
1.9	8	10	0.000585646	0.0224579	3.71e-06	3.15e-05	0.00505872	0.00837362	3.14884e-05	3.84114e-05
2.1	8	10	0.000520171	0.0231013	2.61e-06	3.21e-05	0.00528978	0.00879293	3.21064e-05	3.85524e-05
2.3	8	10	0.000461516	0.0236696	1.47e-06	3.25e-05	0.00552715	0.00919114	3.2469e-05	3.85185e-05
2.5	8	10	0.000405133	0.0242434	2.89e-07	3.28e-05	0.00577518	0.00960144	3.27819e-05	3.85039e-05
2.7	8	10	0.000348336	0.0248659	-9.63e-07	3.31e-05	0.00603742	0.0100434	3.31434e-05	3.85853e-05
2.9	8	10	0.000300074	0.0253863	-2.21e-06	3.32e-05	0.00629843	0.0104447	3.32313e-05	3.84256e-05
1.9	9	-2	0.00176445	0.0105909	1.01e-05	1.06e-05	0.00371488	0.00375989	8.81678e-06	4.06979e-05
2.3	9	-2	0.00145375	0.0134889	8.01e-06	1.32e-05	0.00415786	0.00458073	1.32171e-05	3.3199e-05
1.5	9	0	0.00152585	0.0127467	9.17e-06	1.23e-05	0.00391541	0.00420292	1.23186e-05	3.71813e-05
1.7	9	0	0.00138761	0.0142483	8.32e-06	1.49e-05	0.00409216	0.00480111	1.49178e-05	3.51537e-05
2.3	9	0	0.00123264	0.019473	6.55e-06	2.61e-05	0.004463	0.00684345	2.61343e-05	3.80493e-05
2.5	9	0	0.00105805	0.0183446	4.97e-06	2.19e-05	0.0047958	0.00667125	2.19339e-05	3.4556e-05
1.5	9	2	0.00120538	0.0155121	7.79e-06	1.73e-05	0.00420383	0.0052961	1.73399e-05	3.24156e-05
1.7	9	2	0.00111558	0.0169022	7e-06	2e-05	0.00436963	0.00587985	2.00058e-05	3.35723e-05
2.3	9	2	0.000927608	0.0199898	4.54e-06	2.57e-05	0.00488394	0.00733205	2.56689e-05	3.64018e-05
2.5	9	2	0.000878497	0.02077	3.68e-06	2.69e-05	0.00506514	0.00774886	2.69053e-05	3.70074e-05
1.5	9	4	0.0010429	0.0177806	7.09e-06	2.22e-05	0.00435007	0.00617204	2.22136e-05	3.46299e-05
1.7	9	4	0.000964762	0.018969	6.27e-06	2.45e-05	0.00452346	0.00670942	2.45458e-05	3.57896e-05
2.1	9	4	0.000839322	0.0207634	4.53e-06	2.77e-05	0.00488765	0.00761851	2.76772e-05	3.72659e-05
2.3	9	4	0.000784915	0.0215138	3.6e-06	2.88e-05	0.00508086	0.00803791	2.87935e-05	3.77576e-05
2.5	9	4	0.000735202	0.0221893	2.65e-06	2.97e-05	0.00528008	0.0084387	2.96672e-05	3.81005e-05
2.7	9	4	0.000687875	0.0228405	1.66e-06	3.04e-05	0.00548736	0.00884024	3.04228e-05	3.84045e-05
2.9	9	4	0.000647228	0.0233904	6.75e-07	3.09e-05	0.00569439	0.00920545	3.08964e-05	3.84872e-05
1.5	9	6	0.0016673	0.0175677	9.78e-06	2.39e-05	0.00378811	0.00569848	2.39396e-05	3.31518e-05
1.7	9	6	0.000845444	0.0202696	5.68e-06	2.75e-05	0.00464516	0.00726078	2.74586e-05	3.70966e-05
1.9	9	6	0.000777944	0.0211168	4.76e-06	2.89e-05	0.0048395	0.00771227	2.88552e-05	3.77038e-05
2.1	9	6	0.00071825	0.0218374	3.8e-06	2.99e-05	0.0050402	0.00812843	2.98621e-05	3.80599e-05
2.3	9	6	0.000664183	0.0224793	2.81e-06	3.06e-05	0.00524747	0.00852469	3.06062e-05	3.82709e-05
2.5	9	6	0.000611382	0.0231242	1.77e-06	3.13e-05	0.00546581	0.00893405	3.12885e-05	3.8507e-05
2.7	9	6	0.000561468	0.023745	6.86e-07	3.19e-05	0.00569214	0.00934336	3.18513e-05	3.86975e-05
2.9	9	6	0.000518835	0.0242655	-3.92e-07	3.21e-05	0.00591779	0.00971488	3.21365e-05	3.86594e-05
1.3	9	8	0.00090164	0.0193025	7.01e-06	2.61e-05	0.00436655	0.00671256	2.6105e-05	3.65074e-05
1.5	9	8	0.000817977	0.0203011	6.13e-06	2.8e-05	0.00455249	0.00720261	2.79768e-05	3.72541e-05
1.7	9	8	0.000743213	0.021143	5.19e-06	2.94e-05	0.00474944	0.00765377	2.93611e-05	3.77645e-05
1.9	9	8	0.000675582	0.0218771	4.2e-06	3.04e-05	0.00495619	0.00807966	3.03832e-05	3.80959e-05
2.1	9	8	0.000612528	0.0225589	3.16e-06	3.12e-05	0.00517341	0.00849905	3.11905e-05	3.83519e-05
2.3	9	8	0.000551309	0.0232388	2.07e-06	3.19e-05	0.00540323	0.00893147	3.19118e-05	3.86282e-05
2.5	9	8	0.000500486	0.0237771	9.72e-07	3.22e-05	0.00563215	0.0093116	3.22346e-05	3.85735e-05
2.7	9	8	0.000448753	0.0243642	-1.86e-07	3.26e-05	0.00587474	0.0097229	3.26106e-05	3.86325e-05
2.9	9	8	0.000400458	0.0249281	-1.37e-06	3.29e-05	0.00612377	0.0101315	3.28823e-05	3.86302e-05
1.5	9	10	0.000728873	0.0210012	5.74e-06	2.95e-05	0.00463269	0.00751324	2.95383e-05	3.77519e-05
1.7	9	10	0.000649982	0.0217955	4.73e-06	3.07e-05	0.00484453	0.00796403	3.07143e-05	3.81677e-05
1.9	9	10	0.00057887	0.0224892	3.67e-06	3.15e-05	0.00506644	0.00839126	3.1537e-05	3.83992e-05
2.1	9	10	0.000512843	0.0231354	2.56e-06	3.22e-05	0.00529901	0.00881293	3.21539e-05	3.85449e-05
2.3	9	10	0.000453692	0.0237065	1.42e-06	3.25e-05	0.00553794	0.0092136	3.25156e-05	3.85142e-05
2.5	9	10	0.000396844	0.0242833	2.3e-07	3.28e-05	0.00578761	0.00962647	3.28274e-05	3.8502e-05
2.7	9	10	0.000339634	0.0249087	-1.03e-06	3.32e-05	0.00605152	0.010071	3.31874e-05	3.85846e-05
2.9	9	10	0.000291003	0.0254321	-2.28e-06	3.33e-05	0.00631422	0.0104749	3.3274e-05	3.84257e-05
1.7	10	-2	0.00173073	0.0108598	1e-05	1.07e-05	0.00374216	0.00380537	9.22443e-06	3.97188e-05
2.3	10	-2	0.00132049	0.0156602	7.13e-06	1.73e-05	0.00434177	0.00543101	1.72561e-05	3.39175e-05
1.5	10	0	0.00143555	0.0136335	8.78e-06	1.39e-05	0.00399668	0.00454107	1.38903e-05	3.53348e-05
1.7	10	0	0.00131979	0.014922	7.99e-06	1.62e-05	0.00416132	0.00506947	1.6165e-05	3.36885e-05
1.5	10	2	0.00127112	0.0160104	8.07e-06	1.87e-05	0.00414466	0.00542859	1.86633e-05	3.28285e-05
1.7	10	2	0.0010837	0.017366	6.84e-06	2.1e-05	0.00440214	0.00606282	2.10015e-05	3.40597e-05
2.3	10	2	0.000897541	0.0203551	4.35e-06	2.64e-05	0.00492543	0.00749569	2.64352e-05	3.6782e-05
2.5	10	2	0.000846746	0.0211421	3.45e-06	2.77e-05	0.00511276	0.00792198	2.76643e-05	3.74114e-05
2.7	10	2	0.000805697	0.0217529	2.57e-06	2.84e-05	0.00529649	0.00828449	2.84373e-05	3.76555e-05
2.9	10	2	0.000762524	0.0224151	1.63e-06	2.93e-05	0.00549377	0.00868016	2.92706e-05	3.80377e-05
1.5	10	4	0.00137986	0.0174419	8.54e-06	2.25e-05	0.0040468	0.00584524	2.25339e-05	3.381e-05
1.7	10	4	0.000944426	0.0192121	6.17e-06	2.51e-05	0.0045442	0.0068103	2.50909e-05	3.6042e-05
1.9	10	4	0.000876703	0.0201794	5.29e-06	2.68e-05	0.00472691	0.00728853	2.6846e-05	3.69153e-05
2.1	10	4	0.00081615	0.0210137	4.39e-06	2.82e-05	0.00491685	0.0077319	2.82131e-05	3.75586e-05
2.3	10	4	0.000764415	0.0216975	3.47e-06	2.92e-05	0.00510915	0.00812742	2.91538e-05	3.78844e-05
2.5	10	4	0.000713447	0.0223807	2.5e-06	3e-05	0.00531271	0.00853553	3.0025e-05	3.82384e-05
2.7	10	4	0.00066921	0.0229628	1.52e-06	3.06e-05	0.0055176	0.00890971	3.06044e-05	3.83764e-05
2.9	10	4	0.000623219	0.0235986	4.76e-07	3.12e-05	0.00573616	0.00931781	3.12475e-05	3.86453e-05
1.5	10	6	0.000902574	0.019502	6.49e-06	2.62e-05	0.00447635	0.00686345	2.61526e-05	3.65742e-05
1.7	10	6	0.000827546	0.0204639	5.6e-06	2.79e-05	0.00466342	0.00734407	2.79023e-05	3.73588e-05
1.9	10	6	0.000762792	0.0212451	4.67e-06	2.91e-05	0.00485677	0.00777211	2.91238e-05	3.77981e-05
2.1	10	6	0.000702012	0.0219705	3.7e-06	3.01e-05	0.00506066	0.00819335	3.0127e-05	3.81647e-05
2.3	10	6	0.000646921	0.0226178	2.7e-06	3.09e-05	0.00527129	0.00859508	3.08672e-05	3.83851e-05
2.5	10	6	0.000593144	0.0232693	1.64e-06	3.15e-05	0.00549316	0.00901049	3.1547e-05	3.86306e-05
2.7	10	6	0.000546672	0.0238202	5.71e-07	3.19e-05	0.00571611	0.00939059	3.19353e-05	3.86521e-05
2.9	10	6	0.000498786	0.0244254	-5.58e-07	3.24e-05	0.00595268	0.00980432	3.23901e-05	3.87956e-05
1.3	10	8	0.000889115	0.0194394	6.97e-06	2.64e-05	0.00437632	0.00676748	2.64324e-05	3.66825e-05
1.5	10	8	0.000804318	0.02044	6.07e-06	2.83e-05	0.00456479	0.00726122	2.83021e-05	3.74423e-05
1.7	10	8	0.000732506	0.0212157	5.13e-06	2.95e-05	0.00476036	0.00768839	2.95096e-05	3.77836e-05
1.9	10	8	0.000663961	0.0219529	4.14e-06	3.05e-05	0.00496944	0.00811776	3.0528e-05	3.81249e-05
2.1	10	8	0.00060003	0.0226388	3.09e-06	3.13e-05	0.00518916	0.00854113	3.13327e-05	3.83899e-05
2.3	10	8	0.000542301	0.0232499	2.01e-06	3.19e-05	0.00541566	0.00894507	3.18797e-05	3.84961e-05
2.5	10	8	0.000486363	0.0238672	8.71e-07	3.24e-05	0.00565334	0.00936266	3.23731e-05	3.86242e-05
2.7	10	8	0.000433909	0.0244597	-3.01e-07	3.27e-05	0.00589879	0.0097787	3.27471e-05	3.86869e-05
2.9	10	8	0.00038496	0.0250291	-1.5e-06	3.3e-05	0.00615073	0.0101921	3.30165e-05	3.86868e-05
1.5	10	10	0.000718692	0.0210837	5.7e-06	2.97e-05	0.00464185	0.00754986	2.97252e-05	3.78414e-05
1.7	10	10	0.000638916	0.0218809	4.68e-06	3.09e-05	0.00485582	0.00800397	3.08979e-05	3.8266e-05
1.9	10	10	0.000566955	0.0225785	3.61e-06	3.17e-05	0.00508003	0.00843505	3.17181e-05	3.85046e-05
2.1	10	10	0.000504476	0.0231575	2.51e-06	3.22e-05	0.00530956	0.00882939	3.21615e-05	3.84792e-05
2.3	10	10	0.000440253	0.0238054	1.33e-06	3.27e-05	0.00555649	0.00926601	3.26928e-05	3.86284e-05
2.5	10	10	0.000382739	0.0243874	1.29e-07	3.3e-05	0.00580877	0.00968346	3.30026e-05	3.86185e-05
2.7	10	10	0.000329523	0.0249405	-1.11e-06	3.32e-05	0.00606789	0.0100959	3.31909e-05	3.85282e-05
2.9	10	10	0.000280423	0.0254673	-2.37e-06	3.33e-05	0.00633263	0.0105026	3.32761e-05	3.8371e-05

## Sheet: (34,25.4)
																					whole potentials of the equilibrium droplet		the unit length energy barrier
0	0	0	0.00182368	0	1.04e-05	1.04e-05	0.00364736	0.00364736	0	4.17933e-05		(0,0,0)	-7.486	-238.9	-6.97	-21.42	-251.6	-179.7	-11.7		2.488e-06		2.9e-06
0.2	0	0	0.00175472	0.00815539	1.04e-05	1.05e-05	0.00365564	0.00366115	5.28473e-06	4.08717e-05		(1,0,0)	-2.906	805.8	38.52	86.72	795.1	727.9	289
0.4	0	0	0.00169595	0.010557	1.03e-05	1.05e-05	0.00367802	0.00369845	8.81945e-06	4.01795e-05		(0,1,0)	0.617	-0.4255	-0.1803	-0.03373	-0.1177	0.3105	-0.4016
0.8	0	0	0.00157842	0.0123675	9.89e-06	1.19e-05	0.00376509	0.00399955	1.1914e-05	3.91412e-05		(0,0,1)	1.138	6.647	-0.2315	0.2008	6.805	4.001	-0.2305
1.2	0	0	0.00146089	0.0143532	9.2e-06	1.56e-05	0.00390857	0.00472856	1.56386e-05	3.80481e-05		(2,0,0)	5.748	-873.9	-41.31	-96.8	-810	-898.4	-466.2
1.6	0	0	0.00134336	0.015911	8.25e-06	1.85e-05	0.00410847	0.00537184	1.85496e-05	3.70259e-05		(1,1,0)	-1.223	-0.3481	0.4049	0.1262	-1.667	-0.9102	0.5523
1.9	0	0	0.00117675	0.0164904	6.93e-06	1.9e-05	0.00438486	0.00574621	1.89931e-05	3.33313e-05		(1,0,1)	-1.885	-12.9	0.3909	-0.3852	-13.17	-9.322	-1.41
2	0	0	0.00114543	0.0168189	6.56e-06	1.95e-05	0.00446127	0.00590959	1.95014e-05	3.29485e-05		(0,2,0)	0.008185	0.009104	-0.003719	-0.00286	0.0179	0.00323	0.002384
2.1	0	0	0.00111705	0.0171182	6.2e-06	1.99e-05	0.00453771	0.00606391	1.99415e-05	3.26169e-05		(0,1,1)	-0.009239	0.007328	0.002173	-0.0004147	0.003801	-0.004142	0.01313
2.2	0	0	0.00108989	0.0173912	5.82e-06	2.03e-05	0.00461597	0.00621108	2.03131e-05	3.22859e-05		(0,0,2)	-0.01993	-0.07026	0.005523	-0.0001205	-0.06883	-0.0324	0.0117
2.3	0	0	0.00106573	0.0177983	5.45e-06	2.1e-05	0.00469333	0.00640683	2.10014e-05	3.25813e-05		(3,0,0)	-2.38	404.6	22.29	50.3	363.7	465.5	289.7
2.4	0	0	0.00104121	0.0182128	5.07e-06	2.17e-05	0.00477412	0.00660919	2.16977e-05	3.29213e-05		(2,1,0)	0.9994	0.8184	-0.3547	-0.131	1.387	0.5088	-0.4241
2.5	0	0	0.00101686	0.0186251	4.67e-06	2.24e-05	0.00485759	0.00681416	2.23804e-05	3.32793e-05		(2,0,1)	1.014	8.221	-0.2325	0.1981	8.11	6.846	2.198
2.6	0	0	0.000994624	0.0190008	4.27e-06	2.3e-05	0.00494069	0.00700713	2.29773e-05	3.35783e-05		(1,2,0)	0.0005651	-0.008172	-0.0002555	-0.000305	-0.001377	0.005453	0.00433
1.9	0	-4	0.00176395	0.0105939	1.01e-05	1.06e-05	0.00371546	0.00376086	8.82085e-06	4.0661e-05		(1,1,1)	0.006468	0.00174	-0.0009739	0.001497	0.009381	0.00468	-0.01539
2.3	0	-4	0.00145345	0.0134879	8.01e-06	1.32e-05	0.00415828	0.0045806	1.32141e-05	3.31652e-05		(1,0,2)	0.02903	0.07695	-0.009992	-0.003614	0.07974	0.04424	-0.006796
1.5	0	-2	0.00165629	0.0114652	9.73e-06	1.09e-05	0.00379801	0.00389845	1.01784e-05	3.81318e-05		(0,3,0)	-0.0001985	6.636e-06	8.686e-05	6.481e-05	-0.0001507	-9.122e-05	-6.461e-05
1.7	0	-2	0.00148198	0.0132783	8.78e-06	1.32e-05	0.00399589	0.00442232	1.31777e-05	3.66173e-05		(0,2,1)	7.123e-05	-0.0001682	-3.046e-05	-2.274e-05	-0.0001639	3.755e-05	1.796e-05
2.3	0	-2	0.00123596	0.0184476	6.58e-06	2.35e-05	0.00445842	0.00647989	2.34727e-05	3.70134e-05		(0,1,2)	-1.944e-05	1.893e-05	2.22e-05	3.254e-05	4.204e-06	-4.188e-06	-0.0001453
1.5	0	2	0.00111797	0.0167277	7.42e-06	1.99e-05	0.0042825	0.00576275	1.98908e-05	3.35295e-05		(0,0,3)	0.0001198	0.000387	-3.287e-05	1.393e-06	0.0003411	0.0001505	-6.951e-05
1.7	0	2	0.00103619	0.018032	6.61e-06	2.25e-05	0.0044506	0.00632854	2.24567e-05	3.47875e-05		(4,0,0)	2.396	-69.39	-5.433	-10.62	-63.8	-88.77	-61.9
1.9	0	2	0.000969099	0.0190912	5.8e-06	2.45e-05	0.00462158	0.00682216	2.44554e-05	3.57565e-05		(3,1,0)	-0.3607	-0.1392	0.1461	0.08765	-0.1142	-0.02428	0.09986
2.3	0	2	0.000852845	0.0208583	4.05e-06	2.75e-05	0.00498711	0.00772577	2.74802e-05	3.72856e-05		(3,0,1)	-0.1418	-1.788	0.02636	-0.05044	-1.649	-1.617	-0.7708
2.5	0	2	0.000807469	0.021511	3.17e-06	2.84e-05	0.00517168	0.00810302	2.83681e-05	3.75981e-05		(2,2,0)	0.001651	-0.00134	-0.0008177	-0.0008656	-0.007197	-0.003919	-0.001295
2.7	0	2	0.00075998	0.022212	2.22e-06	2.93e-05	0.00537055	0.00851325	2.93047e-05	3.80403e-05		(2,1,1)	-0.001922	-0.004294	0.0002109	-0.0006067	-0.003291	0.0001759	0.005156
2.9	0	2	0.000718717	0.0228114	1.27e-06	3e-05	0.00557	0.00888886	2.99567e-05	3.82604e-05		(2,0,2)	-0.009951	-0.01797	0.004098	0.002576	-0.02142	-0.01357	-0.0004593
1.5	0	4	0.00098776	0.018499	6.86e-06	2.38e-05	0.00439969	0.00645664	2.38413e-05	3.54412e-05		(1,3,0)	-8.002e-06	2.342e-05	3.47e-06	4.927e-06	8.34e-05	2.788e-05	-2.745e-06
1.7	0	4	0.00091128	0.0196001	6.01e-06	2.6e-05	0.00457801	0.00697245	2.59659e-05	3.6496e-05		(1,2,1)	-2.936e-05	0.0001013	1.52e-05	1.371e-05	-2.949e-06	-5.936e-05	-3.35e-05
1.9	0	4	0.000845207	0.0204978	5.12e-06	2.75e-05	0.00476282	0.00743007	2.75352e-05	3.72105e-05		(1,1,2)	2.548e-05	-3.772e-05	-1.886e-05	-2.366e-05	-1.106e-05	1.305e-05	9.092e-05
2.1	0	4	0.000786416	0.0212699	4.21e-06	2.87e-05	0.00495431	0.00785401	2.87288e-05	3.77003e-05		(1,0,3)	-8.967e-05	-0.0001969	3.122e-05	1.253e-05	-0.0001866	-8.542e-05	3.749e-05
2.3	0	4	0.000732704	0.0219644	3.26e-06	2.97e-05	0.00515291	0.00825993	2.96658e-05	3.80495e-05		(0,4,0)	1.052e-06	-1.994e-07	-4.6e-07	-3.521e-07	1.742e-07	2.494e-07	2.69e-07
2.5	0	4	0.000684073	0.0225871	2.29e-06	3.04e-05	0.00535677	0.00864684	3.03687e-05	3.82555e-05		(0,3,1)	-2.789e-08	1.947e-07	1.789e-08	2.414e-08	7.812e-07	2.697e-07	1.191e-07
2.7	0	4	0.000638174	0.023187	1.28e-06	3.1e-05	0.00556788	0.00903365	3.09614e-05	3.84335e-05		(0,2,2)	-1.989e-07	4.632e-07	7.225e-08	4.277e-08	2.496e-07	-2.513e-07	-9.026e-08
2.9	0	4	0.000590562	0.0238258	2.04e-07	3.16e-05	0.00579298	0.00944898	3.1576e-05	3.86873e-05		(0,1,3)	2.352e-07	-2.28e-07	-1.288e-07	-1.33e-07	-1.427e-07	9.414e-08	4.668e-07
1.5	0	6	0.000880956	0.0197094	6.4e-06	2.66e-05	0.00449581	0.00695087	2.66237e-05	3.67312e-05		(0,0,4)	-2.929e-07	-8.746e-07	7.876e-08	-7.224e-09	-6.454e-07	-3.54e-07	7.794e-08
1.7	0	6	0.000807943	0.0206093	5.5e-06	2.82e-05	0.00468341	0.00741128	2.82058e-05	3.73724e-05
1.9	0	6	0.000741457	0.0213995	4.56e-06	2.94e-05	0.00488109	0.00784696	2.94306e-05	3.78425e-05
2.1	0	6	0.000679067	0.0221248	3.56e-06	3.04e-05	0.00508957	0.00827274	3.04092e-05	3.82026e-05
2.3	0	6	0.000622445	0.0227841	2.53e-06	3.12e-05	0.00530506	0.00868368	3.11551e-05	3.84521e-05
2.5	0	6	0.000571533	0.0233693	1.48e-06	3.17e-05	0.00552558	0.00907338	3.16582e-05	3.85344e-05
2.7	0	6	0.000519352	0.0240061	3.6e-07	3.22e-05	0.00576037	0.00949657	3.22162e-05	3.87442e-05
2.9	0	6	0.000474634	0.0245455	-7.59e-07	3.25e-05	0.0059947	0.00988314	3.25029e-05	3.87285e-05
1.3	0	8	0.000871826	0.0195994	6.9e-06	2.68e-05	0.00438981	0.00683329	2.68072e-05	3.68116e-05
1.5	0	8	0.000789272	0.0205403	6e-06	2.85e-05	0.00457833	0.00730719	2.85155e-05	3.7435e-05
1.7	0	8	0.000711913	0.0213888	5.03e-06	2.99e-05	0.00478136	0.00776727	2.9889e-05	3.79716e-05
1.9	0	8	0.000641853	0.0221296	4.02e-06	3.09e-05	0.00499464	0.00820245	3.08944e-05	3.83187e-05
2.1	0	8	0.000580726	0.0227518	2.97e-06	3.15e-05	0.00521348	0.00860226	3.15232e-05	3.84211e-05
2.3	0	8	0.000521712	0.0233708	1.87e-06	3.21e-05	0.00544408	0.00901303	3.20687e-05	3.85392e-05
2.5	0	8	0.000464558	0.0239984	7.15e-07	3.26e-05	0.00568604	0.00943851	3.25652e-05	3.8683e-05
2.7	0	8	0.000415522	0.0245253	-4.43e-07	3.28e-05	0.00592858	0.00982678	3.27747e-05	3.85865e-05
2.9	0	8	0.000365639	0.0251012	-1.66e-06	3.3e-05	0.00618435	0.0102457	3.30415e-05	3.85908e-05
1.5	0	10	0.000703026	0.0211961	5.63e-06	3e-05	0.00465595	0.00760106	2.99722e-05	3.79331e-05
1.7	0	10	0.000626026	0.0219341	4.62e-06	3.1e-05	0.00486897	0.00803362	3.09812e-05	3.82116e-05
1.9	0	10	0.000552861	0.0226367	3.53e-06	3.18e-05	0.00509609	0.00846917	3.17991e-05	3.84632e-05
2.1	0	10	0.000484894	0.0232935	2.39e-06	3.24e-05	0.00533423	0.00890011	3.24134e-05	3.86252e-05
2.3	0	10	0.000424018	0.023877	1.23e-06	3.28e-05	0.00557889	0.00931078	3.27754e-05	3.86091e-05
2.5	0	10	0.000365565	0.0244654	5.94e-09	3.31e-05	0.00583453	0.00973355	3.30837e-05	3.86044e-05
2.7	0	10	0.00031153	0.0250261	-1.25e-06	3.33e-05	0.00609704	0.0101519	3.32738e-05	3.85219e-05
2.9	0	10	0.000261688	0.02556	-2.53e-06	3.34e-05	0.00636523	0.0105642	3.33591e-05	3.83695e-05
2.3	1	-4	0.00179654	0.0103688	1.03e-05	1.06e-05	0.00368481	0.00370978	8.49729e-06	3.95182e-05
1.7	1	-2	0.00167881	0.0113779	9.74e-06	1.09e-05	0.00379513	0.00389364	1.00292e-05	3.91471e-05
2.3	1	-2	0.00129496	0.0162914	6.96e-06	1.86e-05	0.00437699	0.00567196	1.85625e-05	3.46231e-05
1.5	1	0	0.00141377	0.0138376	8.69e-06	1.43e-05	0.00401628	0.00462015	1.42597e-05	3.49241e-05
1.7	1	0	0.001306	0.0150577	7.93e-06	1.64e-05	0.00417539	0.00512399	1.642e-05	3.32995e-05
2.3	1	0	0.00104997	0.0183089	5.35e-06	2.21e-05	0.00471508	0.00660508	2.21433e-05	3.46459e-05
2.5	1	0	0.000997422	0.0192375	4.53e-06	2.38e-05	0.00488675	0.00705803	2.37623e-05	3.54914e-05
1.5	1	2	0.00126946	0.0161676	8.07e-06	1.9e-05	0.00414616	0.00548285	1.90266e-05	3.30129e-05
1.7	1	2	0.00107171	0.01754	6.79e-06	2.14e-05	0.00441437	0.00613174	2.13797e-05	3.42988e-05
2.3	1	2	0.000888728	0.0204512	4.29e-06	2.66e-05	0.00493759	0.00753978	2.66324e-05	3.68694e-05
2.5	1	2	0.000841462	0.0211693	3.41e-06	2.77e-05	0.00512069	0.00793786	2.77001e-05	3.73422e-05
2.7	1	2	0.000795943	0.0218558	2.5e-06	2.86e-05	0.00531229	0.00833504	2.8635e-05	3.77583e-05
2.9	1	2	0.000756504	0.0224458	1.58e-06	2.93e-05	0.00550425	0.00869958	2.9303e-05	3.7977e-05
1.5	1	4	0.00138908	0.0174361	8.58e-06	2.26e-05	0.00403851	0.00583739	2.25517e-05	3.36947e-05
1.7	1	4	0.000936258	0.0193166	6.13e-06	2.53e-05	0.00455253	0.00685334	2.53289e-05	3.62018e-05
1.9	1	4	0.000872014	0.0202159	5.27e-06	2.69e-05	0.00473226	0.00730561	2.69192e-05	3.69114e-05
2.1	1	4	0.000811088	0.0210457	4.36e-06	2.83e-05	0.00492323	0.00774839	2.82697e-05	3.75386e-05
2.3	1	4	0.000759011	0.0217363	3.43e-06	2.92e-05	0.0051166	0.00814747	2.92231e-05	3.78867e-05
2.5	1	4	0.000707717	0.0224165	2.46e-06	3.01e-05	0.00532131	0.00855551	3.00801e-05	3.82271e-05
2.7	1	4	0.00066318	0.023011	1.47e-06	3.07e-05	0.00552737	0.00893555	3.06861e-05	3.84032e-05
2.9	1	4	0.000616898	0.0236431	4.23e-07	3.13e-05	0.00574716	0.00934336	3.13125e-05	3.86551e-05
1.5	1	6	0.000898227	0.0195424	6.47e-06	2.62e-05	0.00448027	0.00688056	2.62437e-05	3.66048e-05
1.7	1	6	0.000826792	0.0204362	5.59e-06	2.78e-05	0.00466419	0.0073347	2.78232e-05	3.72181e-05
1.9	1	6	0.000757768	0.0212844	4.65e-06	2.92e-05	0.0048625	0.00779079	2.9204e-05	3.7825e-05
2.1	1	6	0.000700819	0.0219469	3.69e-06	3.01e-05	0.00506217	0.00818571	3.00552e-05	3.80453e-05
2.3	1	6	0.000641299	0.0226636	2.66e-06	3.1e-05	0.00527905	0.0086183	3.09541e-05	3.84296e-05
2.5	1	6	0.000591554	0.0232443	1.62e-06	3.15e-05	0.00549555	0.00900261	3.14677e-05	3.85096e-05
2.7	1	6	0.00054051	0.0238758	5.24e-07	3.2e-05	0.00572609	0.00941985	3.20353e-05	3.87189e-05
2.9	1	6	0.000496835	0.0244085	-5.74e-07	3.23e-05	0.00595607	0.00980001	3.23288e-05	3.87013e-05
1.3	1	8	0.000888669	0.0194127	6.97e-06	2.64e-05	0.00437667	0.00675843	2.63582e-05	3.65493e-05
1.5	1	8	0.000803662	0.0204192	6.07e-06	2.82e-05	0.00456538	0.00725429	2.82418e-05	3.73364e-05
1.7	1	8	0.000727609	0.0212602	5.11e-06	2.96e-05	0.00476535	0.00770834	2.9609e-05	3.78449e-05
1.9	1	8	0.000658774	0.0219989	4.11e-06	3.06e-05	0.00497535	0.00813927	3.06264e-05	3.81893e-05
2.1	1	8	0.000594566	0.0226928	3.05e-06	3.14e-05	0.00519604	0.00856673	3.14476e-05	3.84783e-05
2.3	1	8	0.000536571	0.0233013	1.97e-06	3.2e-05	0.00542357	0.0089708	3.1981e-05	3.85707e-05
2.5	1	8	0.000480384	0.0239234	8.28e-07	3.25e-05	0.0056623	0.0093914	3.24808e-05	3.87088e-05
2.7	1	8	0.000432205	0.0244448	-3.14e-07	3.27e-05	0.00590155	0.00977475	3.26934e-05	3.86089e-05
2.9	1	8	0.000383117	0.0250146	-1.52e-06	3.3e-05	0.00615394	0.0101885	3.29625e-05	3.86098e-05
1.5	1	10	0.000713959	0.021129	5.68e-06	2.98e-05	0.00464611	0.00756938	2.98318e-05	3.79178e-05
1.7	1	10	0.000638032	0.0218663	4.67e-06	3.09e-05	0.00485672	0.00799931	3.0852e-05	3.81936e-05
1.9	1	10	0.000565907	0.0225592	3.6e-06	3.17e-05	0.00508122	0.00842876	3.16578e-05	3.84176e-05
2.1	1	10	0.000498919	0.0232128	2.48e-06	3.23e-05	0.00531656	0.00885582	3.22795e-05	3.85792e-05
2.3	1	10	0.00043891	0.0237919	1.32e-06	3.26e-05	0.00555834	0.00926218	3.26465e-05	3.8562e-05
2.5	1	10	0.000381262	0.0243753	1.18e-07	3.3e-05	0.00581099	0.00968029	3.29587e-05	3.85563e-05
2.7	1	10	0.000327927	0.0249303	-1.12e-06	3.32e-05	0.00607048	0.0100936	3.31507e-05	3.84713e-05
2.9	1	10	0.000278718	0.0254595	-2.39e-06	3.32e-05	0.00633559	0.0105015	3.32413e-05	3.83212e-05
1.9	2	-2	0.00163223	0.0137438	9.41e-06	1.44e-05	0.00386561	0.00450312	1.44494e-05	3.8619e-05
2.3	2	-2	0.00141877	0.0138188	7.78e-06	1.38e-05	0.00420614	0.00471925	1.37554e-05	3.24875e-05
1.5	2	0	0.00149816	0.0129764	9.05e-06	1.27e-05	0.00394032	0.00429208	1.27101e-05	3.67287e-05
1.7	2	0	0.00136851	0.0144119	8.23e-06	1.52e-05	0.00411163	0.00486754	1.52104e-05	3.47058e-05
2.3	2	0	0.00123473	0.0196474	6.57e-06	2.66e-05	0.00446011	0.00690256	2.66174e-05	3.81936e-05
1.5	2	2	0.00119656	0.0155702	7.75e-06	1.74e-05	0.00421177	0.00532081	1.74459e-05	3.22601e-05
1.7	2	2	0.00110742	0.0170163	6.96e-06	2.02e-05	0.00437795	0.00592497	2.02478e-05	3.36916e-05
2.3	2	2	0.000919118	0.0200954	4.49e-06	2.59e-05	0.00489566	0.00737906	2.58909e-05	3.65292e-05
2.5	2	2	0.000869622	0.0208755	3.62e-06	2.71e-05	0.00507845	0.00779771	2.71208e-05	3.71348e-05
2.7	2	2	0.000825766	0.021557	2.73e-06	2.81e-05	0.00526398	0.00818673	2.80722e-05	3.75494e-05
2.9	2	2	0.000783756	0.0222139	1.81e-06	2.89e-05	0.00545683	0.00857595	2.89143e-05	3.79284e-05
1.5	2	4	0.00103496	0.017894	7.06e-06	2.25e-05	0.00435721	0.00621634	2.24704e-05	3.48118e-05
1.7	2	4	0.000956732	0.0190793	6.23e-06	2.48e-05	0.00453165	0.00675429	2.47978e-05	3.59765e-05
2.1	2	4	0.000834534	0.0208098	4.5e-06	2.78e-05	0.00489368	0.00763998	2.77737e-05	3.73059e-05
2.3	2	4	0.000779829	0.0215589	3.57e-06	2.89e-05	0.00508787	0.00805992	2.88816e-05	3.77904e-05
2.5	2	4	0.000729835	0.0222345	2.61e-06	2.97e-05	0.00528813	0.00846177	2.97499e-05	3.81297e-05
2.7	2	4	0.000686486	0.022816	1.65e-06	3.03e-05	0.00548961	0.0088324	3.03469e-05	3.82782e-05
2.9	2	4	0.000641357	0.0234419	6.26e-07	3.1e-05	0.0057046	0.00923311	3.09837e-05	3.8529e-05
1.5	2	6	0.00168222	0.0175457	9.84e-06	2.39e-05	0.00377467	0.00568133	2.39378e-05	3.3062e-05
1.7	2	6	0.000840932	0.0203135	5.66e-06	2.76e-05	0.00464976	0.00727995	2.75566e-05	3.71482e-05
1.9	2	6	0.000773144	0.0211608	4.73e-06	2.89e-05	0.00484497	0.00773244	2.89494e-05	3.77541e-05
2.1	2	6	0.000713186	0.021882	3.77e-06	3e-05	0.00504658	0.00814981	2.99531e-05	3.81096e-05
2.3	2	6	0.000658872	0.0225273	2.77e-06	3.07e-05	0.00525479	0.00854838	3.07012e-05	3.83294e-05
2.5	2	6	0.000605837	0.0231747	1.73e-06	3.14e-05	0.00547412	0.00895976	3.13845e-05	3.85698e-05
2.7	2	6	0.000560065	0.0237298	6.75e-07	3.18e-05	0.00569442	0.00933905	3.17994e-05	3.8616e-05
2.9	2	6	0.000512852	0.0243237	-4.41e-07	3.22e-05	0.0059282	0.00974573	3.22399e-05	3.87358e-05
1.3	2	8	0.000901276	0.0192841	7.01e-06	2.61e-05	0.00436684	0.00670639	2.60541e-05	3.64115e-05
1.5	2	8	0.00081353	0.0203496	6.11e-06	2.81e-05	0.00455649	0.00722284	2.80916e-05	3.7336e-05
1.7	2	8	0.000738499	0.021191	5.16e-06	2.95e-05	0.00475424	0.00767478	2.94708e-05	3.78429e-05
1.9	2	8	0.00067062	0.0219286	4.17e-06	3.05e-05	0.00496185	0.008103	3.04983e-05	3.81846e-05
2.1	2	8	0.000607329	0.0226131	3.13e-06	3.13e-05	0.00517996	0.00852444	3.13076e-05	3.8446e-05
2.3	2	8	0.000550205	0.0232263	2.06e-06	3.19e-05	0.00540476	0.00892778	3.18696e-05	3.85633e-05
2.5	2	8	0.000494844	0.0238378	9.32e-07	3.24e-05	0.00564061	0.00934166	3.23569e-05	3.8678e-05
2.7	2	8	0.000442919	0.0244263	-2.31e-07	3.27e-05	0.00588419	0.00975462	3.273e-05	3.8735e-05
2.9	2	8	0.000399001	0.0249182	-1.39e-06	3.28e-05	0.0061263	0.0101292	3.28436e-05	3.85734e-05
1.5	2	10	0.000724287	0.0210512	5.72e-06	2.97e-05	0.00463681	0.00753431	2.96585e-05	3.78489e-05
1.7	2	10	0.000649276	0.0217801	4.73e-06	3.07e-05	0.00484525	0.00795895	3.06672e-05	3.80965e-05
1.9	2	10	0.000578038	0.0224782	3.67e-06	3.15e-05	0.00506739	0.00838789	3.15013e-05	3.83444e-05
2.1	2	10	0.00051189	0.0231211	2.56e-06	3.21e-05	0.00530021	0.00880841	3.21081e-05	3.84798e-05
2.3	2	10	0.000448195	0.0237684	1.39e-06	3.26e-05	0.00554553	0.00924339	3.26471e-05	3.86338e-05
2.5	2	10	0.000391163	0.0243481	1.89e-07	3.3e-05	0.00579614	0.00965847	3.29598e-05	3.86238e-05
2.7	2	10	0.000338371	0.0249001	-1.04e-06	3.32e-05	0.00605356	0.0100691	3.31543e-05	3.85379e-05
2.9	2	10	0.000289655	0.0254255	-2.3e-06	3.32e-05	0.00631656	0.0104738	3.32454e-05	3.83849e-05
1.9	3	-2	0.00179697	0.0100607	1.03e-05	1.05e-05	0.00367781	0.00369811	8.01001e-06	3.29781e-05
2.3	3	-2	0.00158184	0.0122943	8.85e-06	1.14e-05	0.00398109	0.00420358	1.13267e-05	3.53495e-05
1.5	3	0	0.00159333	0.0120629	9.46e-06	1.12e-05	0.00385468	0.00399288	1.1153e-05	3.7389e-05
1.7	3	0	0.00143475	0.0137374	8.55e-06	1.4e-05	0.00404407	0.00460222	1.3985e-05	3.5862e-05
2.3	3	0	0.00123081	0.018945	6.54e-06	2.47e-05	0.00446552	0.0066597	2.47257e-05	3.75274e-05
1.5	3	2	0.00128749	0.015202	8.14e-06	1.69e-05	0.00412993	0.00514555	1.68697e-05	3.20648e-05
1.7	3	2	0.00125535	0.0163717	7.68e-06	1.92e-05	0.00422706	0.00560458	1.92371e-05	3.28374e-05
1.9	3	2	0.00106081	0.0178442	6.3e-06	2.17e-05	0.00451703	0.00630729	2.17448e-05	3.44629e-05
2.1	3	2	0.000997633	0.0189036	5.48e-06	2.37e-05	0.00468818	0.00680119	2.37114e-05	3.54731e-05
2.3	3	2	0.000944433	0.0197794	4.66e-06	2.52e-05	0.00486072	0.00723866	2.52274e-05	3.62063e-05
2.5	3	2	0.000896242	0.0205601	3.81e-06	2.65e-05	0.00503852	0.00765178	2.6478e-05	3.68067e-05
1.5	3	4	0.00105455	0.0176221	7.14e-06	2.19e-05	0.00433958	0.00610989	2.18586e-05	3.44819e-05
1.7	3	4	0.000976712	0.0188194	6.32e-06	2.42e-05	0.00451127	0.00664794	2.42102e-05	3.56354e-05
2.1	3	4	0.000848937	0.0206821	4.58e-06	2.75e-05	0.00487554	0.00757987	2.75157e-05	3.72586e-05
2.3	3	4	0.000795302	0.0214295	3.67e-06	2.86e-05	0.00506652	0.00799592	2.86346e-05	3.77422e-05
2.5	3	4	0.000746324	0.0221018	2.73e-06	2.95e-05	0.00526339	0.00839322	2.95119e-05	3.80811e-05
2.7	3	4	0.000703895	0.022672	1.79e-06	3.01e-05	0.00546141	0.00875616	3.00976e-05	3.82023e-05
2.9	3	4	0.000659659	0.0232933	7.78e-07	3.07e-05	0.00567276	0.00915158	3.07425e-05	3.84521e-05
1.5	3	6	0.000927364	0.0192194	6.6e-06	2.55e-05	0.00445404	0.00674782	2.54969e-05	3.62393e-05
1.7	3	6	0.000854379	0.020174	5.73e-06	2.72e-05	0.00463605	0.00721981	2.72419e-05	3.6987e-05
1.9	3	6	0.000787623	0.0210202	4.81e-06	2.86e-05	0.00482846	0.00766876	2.86439e-05	3.75934e-05
2.1	3	6	0.000728609	0.021739	3.86e-06	2.97e-05	0.00502715	0.00808202	2.96561e-05	3.7948e-05
2.3	3	6	0.000670982	0.0224505	2.85e-06	3.06e-05	0.00523808	0.00850677	3.05736e-05	3.83286e-05
2.5	3	6	0.000618706	0.0230953	1.82e-06	3.13e-05	0.00545482	0.00891474	3.12642e-05	3.85677e-05
2.7	3	6	0.000573654	0.0236394	7.8e-07	3.17e-05	0.0056724	0.0092873	3.16646e-05	3.85877e-05
2.9	3	6	0.000527133	0.0242293	-3.23e-07	3.21e-05	0.00590335	0.00968988	3.21107e-05	3.87071e-05
1.3	3	8	0.000909724	0.0191995	7.04e-06	2.59e-05	0.00436025	0.00667212	2.58553e-05	3.63401e-05
1.5	3	8	0.000822853	0.0202666	6.15e-06	2.79e-05	0.0045481	0.00718703	2.79023e-05	3.7263e-05
1.7	3	8	0.000748661	0.0211078	5.21e-06	2.93e-05	0.00474388	0.0076368	2.92904e-05	3.77692e-05
1.9	3	8	0.000681563	0.0218444	4.23e-06	3.03e-05	0.00494937	0.00806237	3.0326e-05	3.81092e-05
2.1	3	8	0.000619019	0.0225266	3.2e-06	3.11e-05	0.00516523	0.00848068	3.1142e-05	3.83685e-05
2.3	3	8	0.000558294	0.0231987	2.11e-06	3.19e-05	0.00539359	0.00890881	3.18501e-05	3.86231e-05
2.5	3	8	0.000507925	0.0237369	1.03e-06	3.22e-05	0.00562099	0.00928756	3.21812e-05	3.85736e-05
2.7	3	8	0.000456617	0.0243231	-1.25e-07	3.26e-05	0.005862	0.00969713	3.25635e-05	3.86365e-05
2.9	3	8	0.00040871	0.0248848	-1.31e-06	3.28e-05	0.00610941	0.0101035	3.28384e-05	3.86348e-05
1.5	3	10	0.000734025	0.0209618	5.77e-06	2.95e-05	0.00462805	0.00749558	2.94505e-05	3.77216e-05
1.7	3	10	0.000655647	0.0217545	4.76e-06	3.06e-05	0.00483875	0.00794459	3.0628e-05	3.81317e-05
1.9	3	10	0.000585026	0.0224518	3.71e-06	3.15e-05	0.00505943	0.00837192	3.14679e-05	3.83781e-05
2.1	3	10	0.000519466	0.0230935	2.6e-06	3.21e-05	0.00529067	0.00879061	3.208e-05	3.85133e-05
2.3	3	10	0.00045631	0.0237336	1.44e-06	3.26e-05	0.00553433	0.0092214	3.26082e-05	3.86496e-05
2.5	3	10	0.000399773	0.0243104	2.51e-07	3.29e-05	0.00578322	0.00963394	3.29228e-05	3.86378e-05
2.7	3	10	0.000347414	0.0248594	-9.7e-07	3.31e-05	0.00603891	0.0100419	3.31189e-05	3.85507e-05
2.9	3	10	0.000299092	0.0253827	-2.22e-06	3.32e-05	0.00630014	0.0104444	3.32135e-05	3.83992e-05
2.3	4	-2	0.00175018	0.0108639	9.96e-06	1.07e-05	0.0037488	0.00381642	9.22033e-06	3.86799e-05
1.5	4	0	0.00167287	0.0113029	9.8e-06	1.08e-05	0.00378309	0.00387357	9.91886e-06	3.83088e-05
1.7	4	0	0.00149083	0.0131668	8.83e-06	1.3e-05	0.00398687	0.0043803	1.2978e-05	3.6998e-05
2.3	4	0	0.00123621	0.0183701	6.58e-06	2.33e-05	0.00445807	0.00645241	2.32772e-05	3.69745e-05
1.5	4	2	0.00125477	0.0151127	8e-06	1.66e-05	0.00415938	0.0051331	1.65865e-05	3.31198e-05
1.7	4	2	0.00125584	0.0161147	7.68e-06	1.86e-05	0.00422656	0.00551627	1.86394e-05	3.25912e-05
1.9	4	2	0.00108061	0.0175528	6.4e-06	2.11e-05	0.00449445	0.00618941	2.1121e-05	3.41383e-05
2.3	4	2	0.000961135	0.0195724	4.77e-06	2.48e-05	0.00483767	0.00714696	2.47963e-05	3.60323e-05
2.5	4	2	0.000913754	0.0203477	3.93e-06	2.6e-05	0.00501225	0.00755433	2.60446e-05	3.6602e-05
1.5	4	4	0.00106635	0.0174587	7.19e-06	2.15e-05	0.00432895	0.00604608	2.14945e-05	3.43188e-05
1.7	4	4	0.000988706	0.0186646	6.38e-06	2.39e-05	0.00449903	0.00658466	2.38628e-05	3.54643e-05
2.1	4	4	0.00086241	0.0205308	4.67e-06	2.72e-05	0.00485856	0.00751209	2.71903e-05	3.70804e-05
2.3	4	4	0.0008096	0.0212762	3.77e-06	2.83e-05	0.00504679	0.00792433	2.83166e-05	3.75641e-05
2.5	4	4	0.000761419	0.0219375	2.84e-06	2.92e-05	0.00524075	0.00831432	2.91798e-05	3.78773e-05
2.7	4	4	0.000715498	0.022584	1.88e-06	3e-05	0.00544261	0.00870851	2.99525e-05	3.81857e-05
2.9	4	4	0.000671878	0.0232022	8.8e-07	3.06e-05	0.0056515	0.00910044	3.06028e-05	3.84341e-05
1.5	4	6	0.000935605	0.0191267	6.63e-06	2.53e-05	0.00444663	0.00670988	2.52833e-05	3.6144e-05
1.7	4	6	0.000859403	0.0201483	5.75e-06	2.72e-05	0.00463092	0.00720682	2.71959e-05	3.70542e-05
1.9	4	6	0.000797249	0.020928	4.86e-06	2.84e-05	0.00481749	0.00762693	2.84445e-05	3.74964e-05
2.1	4	6	0.000734784	0.0217133	3.9e-06	2.96e-05	0.00501937	0.00806667	2.96236e-05	3.80131e-05
2.3	4	6	0.000681869	0.0223547	2.93e-06	3.04e-05	0.00522306	0.00845928	3.0386e-05	3.82303e-05
2.5	4	6	0.000630166	0.022989	1.9e-06	3.11e-05	0.00543763	0.00886099	3.10607e-05	3.84423e-05
2.7	4	6	0.000581312	0.0236025	8.39e-07	3.16e-05	0.00566	0.00926371	3.16264e-05	3.86242e-05
2.9	4	6	0.000535244	0.0241985	-2.55e-07	3.21e-05	0.00588924	0.00966732	3.20978e-05	3.87692e-05
1.3	4	8	0.000914071	0.0191653	7.06e-06	2.58e-05	0.00435685	0.00665772	2.57782e-05	3.63547e-05
1.5	4	8	0.000831659	0.0201693	6.19e-06	2.77e-05	0.00454018	0.00714656	2.7672e-05	3.71118e-05
1.7	4	8	0.000754099	0.0210752	5.24e-06	2.92e-05	0.00473833	0.00762078	2.92269e-05	3.77813e-05
1.9	4	8	0.000687499	0.0218114	4.26e-06	3.03e-05	0.00494261	0.00804506	3.0268e-05	3.81201e-05
2.1	4	8	0.000625431	0.0224852	3.24e-06	3.11e-05	0.00515715	0.00845899	3.1068e-05	3.83526e-05
2.3	4	8	0.000569475	0.023094	2.18e-06	3.16e-05	0.00537816	0.00885701	3.16401e-05	3.84691e-05
2.5	4	8	0.000515225	0.0237001	1.08e-06	3.21e-05	0.00561004	0.00926501	3.21358e-05	3.85823e-05
2.7	4	8	0.000464317	0.0242804	-6.57e-08	3.25e-05	0.00584953	0.00967097	3.2511e-05	3.8633e-05
2.9	4	8	0.000416776	0.0248392	-1.24e-06	3.28e-05	0.00609537	0.0100748	3.27867e-05	3.86293e-05
1.5	4	10	0.000739187	0.0209243	5.79e-06	2.94e-05	0.0046234	0.0074786	2.93681e-05	3.76965e-05
1.7	4	10	0.000661287	0.0217167	4.79e-06	3.06e-05	0.004833	0.00792633	3.05505e-05	3.81052e-05
1.9	4	10	0.000591123	0.0224055	3.74e-06	3.14e-05	0.00505247	0.00834933	3.13736e-05	3.83251e-05
2.1	4	10	0.000526	0.0230531	2.64e-06	3.2e-05	0.00528244	0.00876899	3.20099e-05	3.84851e-05
2.3	4	10	0.000463242	0.0236885	1.48e-06	3.25e-05	0.00552476	0.00919668	3.25329e-05	3.86118e-05
2.5	4	10	0.000407071	0.0242633	3.03e-07	3.29e-05	0.00577227	0.00960715	3.28503e-05	3.86006e-05
2.7	4	10	0.000355032	0.0248094	-9.11e-07	3.3e-05	0.00602657	0.0100127	3.30468e-05	3.85117e-05
2.9	4	10	0.000302387	0.0254053	-2.19e-06	3.33e-05	0.00629441	0.0104496	3.33008e-05	3.85206e-05
2.3	5	-2	0.00181606	0.0100972	1.04e-05	1.05e-05	0.00365788	0.00366489	8.09764e-06	3.9778e-05
1.5	5	0	0.00171592	0.0108637	9.99e-06	1.07e-05	0.00374434	0.003809	9.22751e-06	3.87182e-05
1.7	5	0	0.00152775	0.0128142	9.01e-06	1.24e-05	0.00394921	0.00424313	1.23747e-05	3.72269e-05
2.3	5	0	0.00124342	0.0179903	6.63e-06	2.24e-05	0.00444812	0.00631222	2.23624e-05	3.6589e-05
2.5	5	0	0.0011381	0.0170616	5.54e-06	1.94e-05	0.00467572	0.00613073	1.93558e-05	3.31958e-05
1.5	5	2	0.00131382	0.014909	8.26e-06	1.63e-05	0.00410623	0.0050322	1.62932e-05	3.29195e-05
1.7	5	2	0.00125798	0.015955	7.69e-06	1.83e-05	0.00422438	0.00546024	1.82788e-05	3.24324e-05
1.9	5	2	0.00109252	0.0173753	6.47e-06	2.07e-05	0.00448088	0.00611796	2.07438e-05	3.39288e-05
2.3	5	2	0.000973336	0.0193956	4.85e-06	2.44e-05	0.00482083	0.00707078	2.4418e-05	3.57897e-05
1.5	5	4	0.00107423	0.01735	7.23e-06	2.13e-05	0.00432187	0.00600369	2.12536e-05	3.41943e-05
1.7	5	4	0.00137183	0.0175737	8.25e-06	2.26e-05	0.00410824	0.00593304	2.26299e-05	3.36037e-05
2.1	5	4	0.000867178	0.0204914	4.69e-06	2.71e-05	0.00485255	0.00749332	2.71128e-05	3.70855e-05
2.3	5	4	0.000814753	0.0212364	3.8e-06	2.82e-05	0.00503968	0.00790434	2.82434e-05	3.75688e-05
2.5	5	4	0.000766945	0.0218967	2.88e-06	2.91e-05	0.00523246	0.00829284	2.911e-05	3.78817e-05
2.7	5	4	0.000721369	0.0225421	1.92e-06	2.99e-05	0.0054331	0.00868546	2.98862e-05	3.81896e-05
2.9	5	4	0.000678074	0.0231512	9.31e-07	3.05e-05	0.00564071	0.00907267	3.05194e-05	3.84122e-05
1.5	5	6	0.000939726	0.0190815	6.65e-06	2.52e-05	0.00444292	0.00669135	2.51799e-05	3.61055e-05
1.7	5	6	0.000867769	0.020045	5.79e-06	2.7e-05	0.00462239	0.00716357	2.69562e-05	3.68758e-05
1.9	5	6	0.000802088	0.0208833	4.89e-06	2.83e-05	0.00481197	0.00760654	2.8349e-05	3.74563e-05
2.1	5	6	0.000739969	0.021668	3.93e-06	2.95e-05	0.00501284	0.00804494	2.95313e-05	3.7973e-05
2.3	5	6	0.000687372	0.0223083	2.96e-06	3.03e-05	0.00521546	0.00843608	3.02968e-05	3.81896e-05
2.5	5	6	0.000635968	0.0229412	1.94e-06	3.1e-05	0.00542893	0.00883615	3.09742e-05	3.8401e-05
2.7	5	6	0.000587404	0.0235532	8.86e-07	3.15e-05	0.00565013	0.00923714	3.15426e-05	3.85828e-05
2.9	5	6	0.000541611	0.0241395	-2.02e-07	3.2e-05	0.00587816	0.00963569	3.19951e-05	3.87021e-05
1.3	5	8	0.000918148	0.0191172	7.08e-06	2.57e-05	0.00435368	0.00663866	2.56629e-05	3.62857e-05
1.5	5	8	0.000832175	0.020186	6.19e-06	2.77e-05	0.00453971	0.00715216	2.77202e-05	3.72067e-05
1.7	5	8	0.000758858	0.0210274	5.26e-06	2.91e-05	0.00473348	0.00759979	2.91178e-05	3.77119e-05
1.9	5	8	0.000692572	0.0217628	4.29e-06	3.02e-05	0.00493682	0.00802276	3.01619e-05	3.80503e-05
2.1	5	8	0.000630801	0.0224354	3.27e-06	3.1e-05	0.00515039	0.00843512	3.09641e-05	3.82816e-05
2.3	5	8	0.000570827	0.0231047	2.19e-06	3.17e-05	0.0053763	0.00885972	3.16788e-05	3.85358e-05
2.5	5	8	0.000516762	0.0237109	1.09e-06	3.22e-05	0.00560774	0.00926752	3.21766e-05	3.86493e-05
2.7	5	8	0.000466027	0.0242958	-5.24e-08	3.26e-05	0.00584676	0.00967506	3.25659e-05	3.87151e-05
2.9	5	8	0.000418646	0.0248545	-1.22e-06	3.28e-05	0.00609212	0.0100787	3.28432e-05	3.87119e-05
1.5	5	10	0.000739799	0.0209383	5.79e-06	2.94e-05	0.00462285	0.00748317	2.94101e-05	3.77707e-05
1.7	5	10	0.000662092	0.0217311	4.79e-06	3.06e-05	0.00483218	0.00793095	3.05951e-05	3.81786e-05
1.9	5	10	0.000592112	0.0224202	3.75e-06	3.14e-05	0.00505135	0.00835394	3.14205e-05	3.83982e-05
2.1	5	10	0.000527164	0.0230604	2.65e-06	3.2e-05	0.00528097	0.00877065	3.20376e-05	3.85326e-05
2.3	5	10	0.000468987	0.0236318	1.52e-06	3.24e-05	0.00551684	0.00916873	3.24176e-05	3.85153e-05
2.5	5	10	0.000408554	0.024276	3.14e-07	3.29e-05	0.00577005	0.0096105	3.28957e-05	3.86661e-05
2.7	5	10	0.000356652	0.0248221	-8.98e-07	3.31e-05	0.00602395	0.0100159	3.30938e-05	3.8578e-05
2.9	5	10	0.000308744	0.0253414	-2.14e-06	3.32e-05	0.00628335	0.0104154	3.31876e-05	3.84228e-05
1.5	6	0	0.00171654	0.0108385	9.99e-06	1.07e-05	0.00374378	0.00380807	9.18562e-06	3.86698e-05
1.7	6	0	0.00153435	0.0127626	9.04e-06	1.23e-05	0.00394248	0.00422251	1.22901e-05	3.735e-05
2.3	6	0	0.00124551	0.0179137	6.64e-06	2.22e-05	0.00444523	0.00628338	2.21833e-05	3.64861e-05
1.5	6	2	0.00131365	0.0148971	8.26e-06	1.63e-05	0.00410638	0.00502827	1.62667e-05	3.28919e-05
1.7	6	2	0.00125758	0.0159583	7.69e-06	1.83e-05	0.00422478	0.00546161	1.8285e-05	3.24615e-05
1.9	6	2	0.00109253	0.0173787	6.47e-06	2.08e-05	0.00448087	0.00611914	2.07519e-05	3.39573e-05
2.3	6	2	0.000973395	0.0193998	4.85e-06	2.44e-05	0.00482075	0.00707224	2.44288e-05	3.58171e-05
2.5	6	2	0.000922569	0.0202555	3.99e-06	2.59e-05	0.00499903	0.00751086	2.58647e-05	3.65733e-05
1.5	6	4	0.00107423	0.0173525	7.23e-06	2.13e-05	0.00432186	0.00600453	2.12596e-05	3.42141e-05
1.7	6	4	0.00137097	0.017578	8.24e-06	2.26e-05	0.00410913	0.00593511	2.26375e-05	3.36229e-05
2.1	6	4	0.000867267	0.0204945	4.69e-06	2.71e-05	0.00485244	0.00749438	2.71216e-05	3.71039e-05
2.3	6	4	0.000814873	0.0212396	3.8e-06	2.83e-05	0.00503951	0.00790541	2.82527e-05	3.75869e-05
2.5	6	4	0.000767096	0.0219001	2.88e-06	2.91e-05	0.00523224	0.00829394	2.91199e-05	3.79e-05
2.7	6	4	0.000721548	0.0225454	1.92e-06	2.99e-05	0.00543281	0.00868653	2.98964e-05	3.82077e-05
2.9	6	4	0.000678281	0.0231546	9.33e-07	3.05e-05	0.00564035	0.00907372	3.05299e-05	3.843e-05
1.5	6	6	0.00093976	0.0190838	6.65e-06	2.52e-05	0.00444289	0.00669212	2.5186e-05	3.61195e-05
1.7	6	6	0.000867831	0.0200473	5.79e-06	2.7e-05	0.00462233	0.00716436	2.69628e-05	3.68894e-05
1.9	6	6	0.000802178	0.0208857	4.89e-06	2.84e-05	0.00481187	0.00760734	2.8356e-05	3.74697e-05
2.1	6	6	0.000740087	0.0216704	3.93e-06	2.95e-05	0.00501269	0.00804573	2.95386e-05	3.79861e-05
2.3	6	6	0.000687513	0.0223108	2.96e-06	3.03e-05	0.00521527	0.00843688	3.03045e-05	3.82027e-05
2.5	6	6	0.000636133	0.0229437	1.94e-06	3.1e-05	0.00542868	0.00883694	3.09822e-05	3.84141e-05
2.7	6	6	0.000587593	0.0235558	8.88e-07	3.16e-05	0.00564982	0.00923791	3.15509e-05	3.85959e-05
2.9	6	6	0.000541822	0.024142	-2.01e-07	3.2e-05	0.00587779	0.00963645	3.20037e-05	3.87152e-05
1.3	6	8	0.000918179	0.0191189	7.08e-06	2.57e-05	0.00435365	0.00663925	2.56677e-05	3.62963e-05
1.5	6	8	0.000832231	0.0201878	6.19e-06	2.77e-05	0.00453966	0.00715276	2.77254e-05	3.72169e-05
1.7	6	8	0.000758938	0.0210292	5.26e-06	2.91e-05	0.0047334	0.00760041	2.91234e-05	3.77222e-05
1.9	6	8	0.000692675	0.0217647	4.29e-06	3.02e-05	0.00493671	0.00802335	3.01676e-05	3.80601e-05
2.1	6	8	0.000630926	0.0224374	3.27e-06	3.1e-05	0.00515023	0.00843577	3.09705e-05	3.82918e-05
2.3	6	8	0.000570973	0.0231068	2.19e-06	3.17e-05	0.0053761	0.00886036	3.16855e-05	3.8546e-05
2.5	6	8	0.000516928	0.0237128	1.09e-06	3.22e-05	0.00560749	0.0092681	3.21832e-05	3.86592e-05
2.7	6	8	0.000466212	0.0242978	-5.1e-08	3.26e-05	0.00584646	0.00967566	3.25729e-05	3.87253e-05
2.9	6	8	0.000418849	0.0248557	-1.22e-06	3.28e-05	0.00609177	0.0100789	3.2848e-05	3.87192e-05
1.5	6	10	0.000739865	0.0209398	5.79e-06	2.94e-05	0.00462279	0.00748366	2.94146e-05	3.77786e-05
1.7	6	10	0.000662179	0.0217327	4.79e-06	3.06e-05	0.00483209	0.00793147	3.06001e-05	3.81868e-05
1.9	6	10	0.000592219	0.0224218	3.75e-06	3.14e-05	0.00505123	0.00835444	3.14256e-05	3.84061e-05
2.1	6	10	0.00052729	0.023062	2.65e-06	3.2e-05	0.00528081	0.00877114	3.20429e-05	3.85405e-05
2.3	6	10	0.000469131	0.0236334	1.52e-06	3.24e-05	0.00551664	0.0091692	3.2423e-05	3.85231e-05
2.5	6	10	0.000408714	0.0242768	3.15e-07	3.29e-05	0.00576981	0.00961064	3.28991e-05	3.86714e-05
2.7	6	10	0.000356827	0.024823	-8.97e-07	3.31e-05	0.00602366	0.0100161	3.30974e-05	3.85834e-05
2.9	6	10	0.000308933	0.0253431	-2.14e-06	3.32e-05	0.00628302	0.0104158	3.31935e-05	3.84307e-05
2.3	7	-2	0.00177752	0.0105913	1.01e-05	1.06e-05	0.00371106	0.00375353	8.82368e-06	3.92068e-05
1.5	7	0	0.00168946	0.0111485	9.87e-06	1.08e-05	0.00376816	0.0038487	9.67573e-06	3.85078e-05
1.7	7	0	0.00150418	0.0130488	8.89e-06	1.28e-05	0.00397325	0.00433375	1.27773e-05	3.72015e-05
2.3	7	0	0.001244	0.0180635	6.63e-06	2.25e-05	0.00444732	0.00633736	2.25478e-05	3.64972e-05
1.5	7	2	0.00130463	0.0149858	8.22e-06	1.64e-05	0.0041145	0.0050631	1.64376e-05	3.26169e-05
1.7	7	2	0.00125648	0.0160616	7.69e-06	1.85e-05	0.0042259	0.00549768	1.85189e-05	3.2535e-05
1.9	7	2	0.00108458	0.0174912	6.43e-06	2.1e-05	0.00448994	0.00616472	2.09891e-05	3.40565e-05
2.3	7	2	0.000965201	0.0195131	4.79e-06	2.47e-05	0.00483206	0.00712142	2.46691e-05	3.59483e-05
1.5	7	4	0.00107027	0.0173971	7.21e-06	2.14e-05	0.00432543	0.00602237	2.1356e-05	3.42112e-05
1.7	7	4	0.000988793	0.018673	6.38e-06	2.39e-05	0.00449894	0.00658758	2.38848e-05	3.55211e-05
2.1	7	4	0.000862681	0.0205402	4.67e-06	2.72e-05	0.00485822	0.00751528	2.72167e-05	3.71346e-05
2.3	7	4	0.000809966	0.0212858	3.77e-06	2.83e-05	0.00504629	0.00792754	2.83445e-05	3.76179e-05
2.5	7	4	0.000761875	0.0219473	2.84e-06	2.92e-05	0.00524007	0.00831753	2.9209e-05	3.79309e-05
2.7	7	4	0.00071604	0.0225938	1.88e-06	3e-05	0.00544174	0.00871167	2.99828e-05	3.82389e-05
2.9	7	4	0.000672502	0.0232122	8.85e-07	3.06e-05	0.00565041	0.00910357	3.06343e-05	3.84873e-05
1.5	7	6	0.000939514	0.0190677	6.65e-06	2.51e-05	0.00444311	0.00668663	2.51426e-05	3.60195e-05
1.7	7	6	0.000863487	0.0200964	5.77e-06	2.71e-05	0.00462676	0.00718517	2.70748e-05	3.69558e-05
1.9	7	6	0.000797522	0.0209351	4.86e-06	2.85e-05	0.00481718	0.0076293	2.84654e-05	3.7536e-05
2.1	7	6	0.000739235	0.0216525	3.92e-06	2.95e-05	0.00501376	0.0080399	2.94848e-05	3.789e-05
2.3	7	6	0.000682297	0.0223621	2.93e-06	3.04e-05	0.00522247	0.00846165	3.0409e-05	3.82694e-05
2.5	7	6	0.000630664	0.0229966	1.9e-06	3.11e-05	0.00543688	0.00886336	3.10849e-05	3.84815e-05
2.7	7	6	0.000581879	0.0236101	8.44e-07	3.17e-05	0.00565908	0.00926604	3.16514e-05	3.86633e-05
2.9	7	6	0.000540294	0.0241314	-2.13e-07	3.2e-05	0.00588045	0.00963415	3.19627e-05	3.86459e-05
1.3	7	8	0.00091796	0.0191133	7.08e-06	2.57e-05	0.00435382	0.00663742	2.56518e-05	3.62462e-05
1.5	7	8	0.000831826	0.0201746	6.19e-06	2.77e-05	0.00454003	0.00714836	2.76875e-05	3.71423e-05
1.7	7	8	0.000758356	0.0210155	5.26e-06	2.91e-05	0.00473399	0.0075959	2.90825e-05	3.76481e-05
1.9	7	8	0.00068781	0.0218172	4.27e-06	3.03e-05	0.00494225	0.00804693	3.02859e-05	3.81503e-05
2.1	7	8	0.000625807	0.0224911	3.24e-06	3.11e-05	0.00515668	0.00846085	3.10867e-05	3.83825e-05
2.3	7	8	0.000569912	0.0230999	2.19e-06	3.17e-05	0.00537756	0.00885882	3.16593e-05	3.84988e-05
2.5	7	8	0.000515722	0.0237061	1.08e-06	3.22e-05	0.0056093	0.0092668	3.21558e-05	3.86121e-05
2.7	7	8	0.00046487	0.0242848	-6.14e-08	3.25e-05	0.00584863	0.00967208	3.25273e-05	3.86578e-05
2.9	7	8	0.000417381	0.0248435	-1.23e-06	3.28e-05	0.00609432	0.0100758	3.28033e-05	3.86541e-05
1.5	7	10	0.000739385	0.0209288	5.79e-06	2.94e-05	0.00462323	0.00748006	2.93815e-05	3.77202e-05
1.7	7	10	0.000661547	0.0217213	4.79e-06	3.06e-05	0.00483274	0.00792782	3.05649e-05	3.81289e-05
1.9	7	10	0.000591443	0.0224103	3.74e-06	3.14e-05	0.00505211	0.00835082	3.13888e-05	3.83487e-05
2.1	7	10	0.000526377	0.0230503	2.64e-06	3.2e-05	0.00528196	0.00876756	3.20045e-05	3.84831e-05
2.3	7	10	0.000463672	0.0236925	1.49e-06	3.25e-05	0.00552417	0.0091978	3.2547e-05	3.86328e-05
2.5	7	10	0.000407551	0.0242674	3.07e-07	3.29e-05	0.00577155	0.00960823	3.28649e-05	3.86216e-05
2.7	7	10	0.000355556	0.0248135	-9.07e-07	3.31e-05	0.00602572	0.0100138	3.30619e-05	3.8533e-05
2.9	7	10	0.000302953	0.0254094	-2.18e-06	3.33e-05	0.00629343	0.0104506	3.33163e-05	3.8542e-05
1.9	8	-2	0.00181723	0.0095652	1.04e-05	1.05e-05	0.00365472	0.00365962	7.271e-06	3.23308e-05
2.3	8	-2	0.00162973	0.0119152	9.17e-06	1.12e-05	0.00391501	0.00409344	1.07648e-05	3.62481e-05
1.5	8	0	0.0016162	0.0118526	9.56e-06	1.1e-05	0.00383409	0.00395858	1.08073e-05	3.76827e-05
1.7	8	0	0.00145183	0.0135769	8.64e-06	1.37e-05	0.00402664	0.00453885	1.37024e-05	3.61583e-05
2.3	8	0	0.00123121	0.0188094	6.54e-06	2.44e-05	0.00446497	0.00661161	2.43751e-05	3.74203e-05
1.5	8	2	0.00129212	0.0151542	8.16e-06	1.68e-05	0.00412576	0.00512684	1.6776e-05	3.22461e-05
1.7	8	2	0.00125452	0.0163277	7.68e-06	1.91e-05	0.0042279	0.00559004	1.91309e-05	3.28327e-05
1.9	8	2	0.00106869	0.0177251	6.34e-06	2.15e-05	0.00450804	0.00625921	2.14881e-05	3.42918e-05
2.3	8	2	0.00139358	0.0211999	7.61e-06	3.22e-05	0.00424089	0.00726896	3.21794e-05	3.93726e-05
2.5	8	2	0.000900705	0.0205095	3.84e-06	2.64e-05	0.00503182	0.00762823	2.63765e-05	3.67692e-05
1.5	8	4	0.00105847	0.0175656	7.16e-06	2.17e-05	0.00433605	0.00608791	2.17319e-05	3.44101e-05
1.7	8	4	0.000980689	0.0187655	6.34e-06	2.41e-05	0.00450721	0.00662605	2.40883e-05	3.55619e-05
2.1	8	4	0.000853363	0.020629	4.61e-06	2.74e-05	0.00486996	0.00755633	2.73996e-05	3.71832e-05
2.3	8	4	0.000799976	0.0213756	3.7e-06	2.85e-05	0.00506007	0.00797108	2.85204e-05	3.7667e-05
2.5	8	4	0.000751236	0.0220466	2.77e-06	2.94e-05	0.00525603	0.00836687	2.93992e-05	3.8006e-05
2.7	8	4	0.000704805	0.0226882	1.79e-06	3.01e-05	0.00545994	0.00876133	3.01475e-05	3.8289e-05
2.9	8	4	0.000664992	0.0232352	8.23e-07	3.06e-05	0.00566348	0.00912207	3.06333e-05	3.83767e-05
1.5	8	6	0.000931356	0.0191648	6.61e-06	2.54e-05	0.00445045	0.00672603	2.53677e-05	3.61404e-05
1.7	8	6	0.000854702	0.0201854	5.73e-06	2.73e-05	0.00463572	0.00722366	2.72743e-05	3.70526e-05
1.9	8	6	0.000788086	0.021032	4.81e-06	2.87e-05	0.00482794	0.00767264	2.86784e-05	3.76582e-05
2.1	8	6	0.000729201	0.021751	3.86e-06	2.97e-05	0.0050264	0.00808593	2.96925e-05	3.80124e-05
2.3	8	6	0.000675893	0.0223932	2.89e-06	3.05e-05	0.00523131	0.00848	3.04506e-05	3.82302e-05
2.5	8	6	0.000623814	0.0230365	1.86e-06	3.11e-05	0.00544716	0.0088864	3.11428e-05	3.8469e-05
2.7	8	6	0.000574597	0.0236517	7.87e-07	3.17e-05	0.00567087	0.00929103	3.17052e-05	3.86511e-05
2.9	8	6	0.000528185	0.0242417	-3.14e-07	3.22e-05	0.00590152	0.00969353	3.21526e-05	3.87706e-05
1.3	8	8	0.000909882	0.019208	7.05e-06	2.59e-05	0.00436012	0.00667496	2.58786e-05	3.63913e-05
1.5	8	8	0.000827047	0.0202111	6.17e-06	2.78e-05	0.00454433	0.00716452	2.77675e-05	3.7149e-05
1.7	8	8	0.000749067	0.0211171	5.22e-06	2.93e-05	0.00474346	0.00763983	2.93181e-05	3.78189e-05
1.9	8	8	0.000682082	0.0218539	4.23e-06	3.04e-05	0.00494878	0.00806544	3.03554e-05	3.81587e-05
2.1	8	8	0.000619646	0.0225286	3.21e-06	3.12e-05	0.00516444	0.00848086	3.11517e-05	3.83918e-05
2.3	8	8	0.000563337	0.0231389	2.14e-06	3.17e-05	0.00538663	0.00888061	3.17209e-05	3.85087e-05
2.5	8	8	0.000508752	0.0237468	1.03e-06	3.22e-05	0.00561975	0.00929051	3.22142e-05	3.86226e-05
2.7	8	8	0.000457537	0.0243313	-1.18e-07	3.26e-05	0.00586051	0.00969933	3.2593e-05	3.86803e-05
2.9	8	8	0.000409716	0.0248931	-1.3e-06	3.29e-05	0.00610766	0.0101056	3.28687e-05	3.86789e-05
1.5	8	10	0.000734357	0.0209693	5.77e-06	2.95e-05	0.00462775	0.00749803	2.9473e-05	3.77611e-05
1.7	8	10	0.000656082	0.0217622	4.76e-06	3.07e-05	0.00483831	0.00794704	3.06518e-05	3.81706e-05
1.9	8	10	0.00058556	0.0224522	3.71e-06	3.15e-05	0.00505882	0.0083716	3.14721e-05	3.83915e-05
2.1	8	10	0.000520095	0.0231014	2.61e-06	3.21e-05	0.00528988	0.00879303	3.21061e-05	3.8552e-05
2.3	8	10	0.000461449	0.0236707	1.47e-06	3.25e-05	0.00552724	0.00919163	3.24715e-05	3.85214e-05
2.5	8	10	0.000405074	0.0242463	2.89e-07	3.28e-05	0.00577527	0.00960262	3.27891e-05	3.85123e-05
2.7	8	10	0.000348285	0.0248668	-9.63e-07	3.31e-05	0.0060375	0.0100439	3.31454e-05	3.85876e-05
2.9	8	10	0.00030003	0.0253891	-2.21e-06	3.32e-05	0.00629851	0.0104459	3.32383e-05	3.84337e-05
1.9	9	-2	0.0017642	0.0105838	1.01e-05	1.06e-05	0.00371517	0.00376038	8.80458e-06	4.06416e-05
2.3	9	-2	0.00145354	0.0134794	8.01e-06	1.32e-05	0.00415815	0.00457766	1.31978e-05	3.31504e-05
1.5	9	0	0.00152562	0.0127378	9.17e-06	1.23e-05	0.00391561	0.00420011	1.23011e-05	3.71287e-05
1.7	9	0	0.0013874	0.0142384	8.32e-06	1.49e-05	0.00409236	0.00479788	1.48965e-05	3.51033e-05
2.3	9	0	0.00123246	0.0194599	6.55e-06	2.61e-05	0.00446325	0.00683901	2.60979e-05	3.79962e-05
2.5	9	0	0.0010579	0.0183384	4.96e-06	2.19e-05	0.00479604	0.00666914	2.19182e-05	3.45313e-05
1.5	9	2	0.00120521	0.0155009	7.79e-06	1.73e-05	0.00420399	0.00529236	1.73143e-05	3.23678e-05
1.7	9	2	0.00111541	0.0168942	7e-06	2e-05	0.00436979	0.00587716	1.99862e-05	3.35393e-05
2.3	9	2	0.000927473	0.0199884	4.54e-06	2.57e-05	0.00488413	0.00733168	2.56646e-05	3.63956e-05
2.5	9	2	0.000878368	0.0207684	3.68e-06	2.69e-05	0.00506533	0.00774839	2.69002e-05	3.70003e-05
1.5	9	4	0.00104274	0.0177748	7.09e-06	2.22e-05	0.0043502	0.00617012	2.21986e-05	3.46065e-05
1.7	9	4	0.000964621	0.0189637	6.26e-06	2.45e-05	0.0045236	0.00670767	2.45316e-05	3.57688e-05
2.1	9	4	0.000839199	0.0207623	4.53e-06	2.77e-05	0.00488781	0.00761821	2.76735e-05	3.72609e-05
2.3	9	4	0.0007848	0.0215106	3.6e-06	2.88e-05	0.00508101	0.00803683	2.87842e-05	3.77454e-05
2.5	9	4	0.000735095	0.022185	2.65e-06	2.97e-05	0.00528024	0.00843716	2.96548e-05	3.80846e-05
2.7	9	4	0.000687774	0.0228378	1.66e-06	3.04e-05	0.00548753	0.00883931	3.04148e-05	3.83943e-05
2.9	9	4	0.000647133	0.0233896	6.74e-07	3.09e-05	0.00569455	0.00920523	3.08933e-05	3.84833e-05
1.5	9	6	0.00166705	0.0175509	9.78e-06	2.39e-05	0.00378832	0.00569321	2.3893e-05	3.30873e-05
1.7	9	6	0.000845321	0.0202633	5.68e-06	2.74e-05	0.00464529	0.00725862	2.7441e-05	3.70727e-05
1.9	9	6	0.000777831	0.0211102	4.76e-06	2.88e-05	0.00483963	0.00770994	2.88364e-05	3.76794e-05
2.1	9	6	0.000718145	0.0218304	3.8e-06	2.98e-05	0.00504033	0.00812592	2.98423e-05	3.80347e-05
2.3	9	6	0.000664086	0.0224746	2.81e-06	3.06e-05	0.0052476	0.00852299	3.05926e-05	3.82539e-05
2.5	9	6	0.000611293	0.0231205	1.77e-06	3.13e-05	0.00546594	0.00893273	3.12779e-05	3.8494e-05
2.7	9	6	0.000561386	0.023739	6.85e-07	3.18e-05	0.00569228	0.00934107	3.18344e-05	3.8677e-05
2.9	9	6	0.000518759	0.0242658	-3.92e-07	3.21e-05	0.00591792	0.00971509	3.21366e-05	3.86595e-05
1.3	9	8	0.000901508	0.0192958	7.01e-06	2.61e-05	0.00436665	0.00671032	2.60865e-05	3.64815e-05
1.5	9	8	0.000817857	0.0202977	6.13e-06	2.8e-05	0.0045526	0.00720145	2.79667e-05	3.72406e-05
1.7	9	8	0.000743104	0.0211385	5.19e-06	2.93e-05	0.00474955	0.0076522	2.93479e-05	3.77475e-05
1.9	9	8	0.000675483	0.0218753	4.2e-06	3.04e-05	0.00495631	0.00807908	3.03776e-05	3.80889e-05
2.1	9	8	0.000612439	0.0225584	3.16e-06	3.12e-05	0.00517352	0.00849894	3.11885e-05	3.83494e-05
2.3	9	8	0.000551228	0.0232319	2.06e-06	3.19e-05	0.00540334	0.0089289	3.18923e-05	3.86046e-05
2.5	9	8	0.000500413	0.0237797	9.72e-07	3.22e-05	0.00563226	0.00931267	3.22409e-05	3.85809e-05
2.7	9	8	0.000448687	0.0243655	-1.87e-07	3.26e-05	0.00587485	0.00972347	3.26134e-05	3.86358e-05
2.9	9	8	0.000400399	0.0249294	-1.38e-06	3.29e-05	0.00612387	0.010132	3.28851e-05	3.86335e-05
1.5	9	10	0.000728766	0.0209977	5.74e-06	2.95e-05	0.00463278	0.00751207	2.9528e-05	3.77388e-05
1.7	9	10	0.000649887	0.0217907	4.73e-06	3.07e-05	0.00484463	0.00796234	3.07002e-05	3.81502e-05
1.9	9	10	0.000578785	0.0224891	3.67e-06	3.15e-05	0.00506654	0.00839127	3.1536e-05	3.83979e-05
2.1	9	10	0.000512768	0.0231321	2.56e-06	3.21e-05	0.00529911	0.00881174	3.21442e-05	3.85333e-05
2.3	9	10	0.000453625	0.0237077	1.42e-06	3.25e-05	0.00553804	0.00921414	3.25184e-05	3.85175e-05
2.5	9	10	0.000396786	0.0242861	2.3e-07	3.28e-05	0.0057877	0.00962762	3.28344e-05	3.85103e-05
2.7	9	10	0.000339584	0.0249087	-1.03e-06	3.32e-05	0.0060516	0.0100711	3.31872e-05	3.85844e-05
2.9	9	10	0.00029096	0.025435	-2.28e-06	3.33e-05	0.00631429	0.0104761	3.32813e-05	3.84342e-05
1.7	10	-2	0.00173048	0.0108525	9.99e-06	1.07e-05	0.00374242	0.0038058	9.21158e-06	3.96635e-05
2.3	10	-2	0.00132029	0.0156483	7.13e-06	1.72e-05	0.00434203	0.00542703	1.7229e-05	3.38642e-05
1.5	10	0	0.00143534	0.013624	8.78e-06	1.39e-05	0.00399687	0.004538	1.38704e-05	3.52841e-05
1.7	10	0	0.0013196	0.0149114	7.99e-06	1.61e-05	0.00416152	0.00506599	1.61415e-05	3.36396e-05
1.5	10	2	0.00127094	0.0159983	8.07e-06	1.86e-05	0.00414483	0.0054246	1.86346e-05	3.2778e-05
1.7	10	2	0.00108354	0.0173616	6.84e-06	2.1e-05	0.0044023	0.00606138	2.09902e-05	3.40413e-05
2.3	10	2	0.00089741	0.0203516	4.35e-06	2.64e-05	0.00492561	0.00749453	2.64253e-05	3.67681e-05
2.5	10	2	0.000846622	0.0211328	3.45e-06	2.76e-05	0.00511295	0.00791863	2.76391e-05	3.73774e-05
2.7	10	2	0.000805579	0.021746	2.57e-06	2.84e-05	0.00529668	0.008282	2.84184e-05	3.76305e-05
2.9	10	2	0.000762413	0.0224074	1.63e-06	2.92e-05	0.00549396	0.00867735	2.92498e-05	3.80107e-05
1.5	10	4	0.00137966	0.0174282	8.54e-06	2.25e-05	0.00404698	0.00584075	2.24976e-05	3.37554e-05
1.7	10	4	0.000944287	0.0192066	6.17e-06	2.51e-05	0.00454434	0.00680843	2.50758e-05	3.60202e-05
1.9	10	4	0.000876574	0.0201736	5.29e-06	2.68e-05	0.00472706	0.00728654	2.68299e-05	3.68931e-05
2.1	10	4	0.000816031	0.0210031	4.39e-06	2.82e-05	0.004917	0.00772811	2.8184e-05	3.75199e-05
2.3	10	4	0.000764303	0.021693	3.47e-06	2.91e-05	0.0051093	0.00812587	2.91411e-05	3.78679e-05
2.5	10	4	0.000713343	0.022372	2.5e-06	3e-05	0.00531287	0.00853234	3.0001e-05	3.82079e-05
2.7	10	4	0.000669112	0.0229575	1.52e-06	3.06e-05	0.00551776	0.00890776	3.05894e-05	3.83575e-05
2.9	10	4	0.000623128	0.0235958	4.75e-07	3.12e-05	0.00573632	0.00931682	3.12393e-05	3.86351e-05
1.5	10	6	0.000902442	0.019496	6.49e-06	2.61e-05	0.00447647	0.00686143	2.6136e-05	3.6551e-05
1.7	10	6	0.000827425	0.0204556	5.6e-06	2.79e-05	0.00466354	0.0073412	2.78792e-05	3.73279e-05
1.9	10	6	0.00076268	0.0212377	4.67e-06	2.91e-05	0.0048569	0.00776949	2.91028e-05	3.7771e-05
2.1	10	6	0.000701909	0.0219675	3.7e-06	3.01e-05	0.00506079	0.00819234	3.01182e-05	3.81536e-05
2.3	10	6	0.000646826	0.0226149	2.69e-06	3.09e-05	0.00527142	0.00859407	3.08586e-05	3.83745e-05
2.5	10	6	0.000593058	0.0232654	1.64e-06	3.15e-05	0.00549329	0.00900908	3.15358e-05	3.86169e-05
2.7	10	6	0.000546592	0.023816	5.71e-07	3.19e-05	0.00571624	0.00938903	3.19234e-05	3.86376e-05
2.9	10	6	0.000498713	0.0244216	-5.59e-07	3.24e-05	0.0059528	0.0098029	3.23795e-05	3.87829e-05
1.3	10	8	0.000888985	0.0194274	6.97e-06	2.64e-05	0.00437642	0.00676336	2.63992e-05	3.66363e-05
1.5	10	8	0.0008042	0.0204346	6.07e-06	2.83e-05	0.00456489	0.00725939	2.82867e-05	3.7422e-05
1.7	10	8	0.000732398	0.021211	5.13e-06	2.95e-05	0.00476047	0.00768679	2.94961e-05	3.77663e-05
1.9	10	8	0.000663863	0.0219488	4.14e-06	3.05e-05	0.00496955	0.00811631	3.05159e-05	3.81098e-05
2.1	10	8	0.000599943	0.0226339	3.09e-06	3.13e-05	0.00518927	0.00853937	3.13186e-05	3.83728e-05
2.3	10	8	0.000542222	0.0232484	2.01e-06	3.19e-05	0.00541577	0.00894458	3.18751e-05	3.84905e-05
2.5	10	8	0.000486292	0.0238672	8.71e-07	3.24e-05	0.00565344	0.00936271	3.23724e-05	3.86235e-05
2.7	10	8	0.000433845	0.0244594	-3.01e-07	3.27e-05	0.00589889	0.00977863	3.27456e-05	3.86851e-05
2.9	10	8	0.000384904	0.0250291	-1.5e-06	3.3e-05	0.00615083	0.0101921	3.3016e-05	3.86863e-05
1.5	10	10	0.000718587	0.0210784	5.7e-06	2.97e-05	0.00464194	0.00754802	2.97097e-05	3.78216e-05
1.7	10	10	0.000638822	0.0218797	4.68e-06	3.09e-05	0.00485591	0.0080036	3.0894e-05	3.82612e-05
1.9	10	10	0.000566872	0.0225728	3.61e-06	3.17e-05	0.00508012	0.00843298	3.17015e-05	3.84845e-05
2.1	10	10	0.000504402	0.0231583	2.51e-06	3.22e-05	0.00530965	0.00882978	3.21634e-05	3.84816e-05
2.3	10	10	0.000440189	0.0238043	1.33e-06	3.27e-05	0.00555658	0.00926565	3.26893e-05	3.86243e-05
2.5	10	10	0.000382683	0.0243869	1.29e-07	3.3e-05	0.00580886	0.0096833	3.30007e-05	3.86162e-05
2.7	10	10	0.000329474	0.0249418	-1.11e-06	3.32e-05	0.00606797	0.0100965	3.31938e-05	3.85316e-05
2.9	10	10	0.000280382	0.0254703	-2.37e-06	3.33e-05	0.0063327	0.0105039	3.32836e-05	3.83797e-05

## Sheet: (35,25.4)
																					whole potentials of the equilibrium droplet		the unit length energy barrier
0	0	0	0.00182368	0	1.04e-05	1.04e-05	0.00364736	0.00364736	0	4.17933e-05		(0,0,0)	-7.539	-224.9	-6.966	-21.56	-353.7	-180.9	-11.94		2.485e-06		2.9e-06
0.2	0	0	0.00175353	0.00816499	1.04e-05	1.05e-05	0.00365578	0.00366139	5.29704e-06	4.09669e-05		(1,0,0)	-2.732	764.4	38.53	87.02	1106	729.4	289.4
0.4	0	0	0.00169385	0.0105698	1.03e-05	1.05e-05	0.00367852	0.00369929	8.8401e-06	4.02735e-05		(0,1,0)	0.6135	-0.4056	-0.1838	-0.03633	-0.3453	0.3066	-0.397
0.8	0	0	0.00157447	0.0123842	9.88e-06	1.19e-05	0.00376698	0.00400597	1.19422e-05	3.92339e-05		(0,0,1)	1.138	6.335	-0.2346	0.2042	8.99	4.053	-0.2284
1.2	0	0	0.0014551	0.0143507	9.18e-06	1.56e-05	0.00391274	0.00473022	1.56215e-05	3.80066e-05		(2,0,0)	5.696	-828.4	-41.22	-96.94	-1157	-897.7	-466.1
1.6	0	0	0.00133572	0.0159123	8.21e-06	1.85e-05	0.0041158	0.00537695	1.85287e-05	3.6984e-05		(1,1,0)	-1.216	-0.378	0.4116	0.1304	-1.351	-0.8999	0.5428
1.9	0	0	0.00117658	0.0165026	6.93e-06	1.9e-05	0.00438505	0.00575061	1.90207e-05	3.33799e-05		(1,0,1)	-1.886	-12.24	0.3964	-0.3914	-17.92	-9.397	-1.406
2	0	0	0.00114526	0.0168314	6.56e-06	1.95e-05	0.00446147	0.00591413	1.95299e-05	3.29966e-05		(0,2,0)	0.008149	0.008942	-0.003754	-0.002867	0.02005	0.003272	0.002406
2.1	0	0	0.00111689	0.017131	6.2e-06	2e-05	0.00453792	0.00606857	1.99706e-05	3.26646e-05		(0,1,1)	-0.009174	0.007123	0.002216	-0.0003844	0.006452	-0.004298	0.01299
2.2	0	0	0.00108973	0.0174043	5.82e-06	2.03e-05	0.00461618	0.00621587	2.03429e-05	3.23333e-05		(0,0,2)	-0.01993	-0.06765	0.005586	-0.0001482	-0.08578	-0.03307	0.01174
2.3	0	0	0.00106557	0.0178116	5.45e-06	2.1e-05	0.00469355	0.00641177	2.10321e-05	3.2629e-05		(3,0,0)	-2.445	382.6	22.2	50.26	532.5	464	289.5
2.4	0	0	0.00104106	0.0182264	5.07e-06	2.17e-05	0.00477433	0.00661426	2.17293e-05	3.29693e-05		(2,1,0)	0.9948	0.8325	-0.3593	-0.1326	1.296	0.5118	-0.4177
2.5	0	0	0.00101672	0.018639	4.67e-06	2.24e-05	0.00485781	0.00681939	2.2413e-05	3.33277e-05		(2,0,1)	1.015	7.765	-0.236	0.2013	11.47	6.874	2.191
2.6	0	0	0.00099448	0.0190076	4.27e-06	2.3e-05	0.00494091	0.00700977	2.29928e-05	3.3601e-05		(1,2,0)	0.0005538	-0.007937	-0.0002803	-0.000349	-0.004828	0.005066	0.004293
1.9	0	-4	0.00176369	0.0106015	1.01e-05	1.06e-05	0.00371575	0.00376134	8.83307e-06	4.07173e-05		(1,1,1)	0.00641	0.001836	-0.0009962	0.001491	0.008088	0.00494	-0.01521
2.3	0	-4	0.00145324	0.013498	8.01e-06	1.32e-05	0.00415857	0.00458422	1.32334e-05	3.32138e-05		(1,0,2)	0.02901	0.07349	-0.01009	-0.00359	0.1027	0.04495	-0.006917
1.5	0	-2	0.00165605	0.0114735	9.73e-06	1.09e-05	0.00379823	0.00389881	1.01927e-05	3.81854e-05		(0,3,0)	-0.0001976	5.804e-06	8.793e-05	6.55e-05	-0.0001471	-8.867e-05	-6.46e-05
1.7	0	-2	0.00148177	0.013288	8.78e-06	1.32e-05	0.00399611	0.00442566	1.31964e-05	3.66694e-05		(0,2,1)	7.089e-05	-0.0001659	-3.094e-05	-2.321e-05	-0.000196	3.549e-05	1.776e-05
2.3	0	-2	0.00123578	0.0184554	6.57e-06	2.35e-05	0.00445866	0.0064828	2.34916e-05	3.70432e-05		(0,1,2)	-1.957e-05	1.843e-05	2.237e-05	3.266e-05	-4.281e-08	-1.263e-06	-0.000144
1.5	0	0	0.00133724	0.0146409	8.36e-06	1.58e-05	0.00408516	0.00492926	1.57706e-05	3.35124e-05		(0,0,3)	0.0001198	0.0003772	-3.328e-05	1.493e-06	0.0003954	0.0001539	-7.01e-05
1.5	0	2	0.00111781	0.0167336	7.42e-06	1.99e-05	0.00428264	0.00576489	1.99044e-05	3.35523e-05		(4,0,0)	2.424	-65.46	-5.417	-10.59	-93.97	-88.31	-61.86
1.7	0	2	0.00103604	0.0180437	6.61e-06	2.25e-05	0.00445075	0.00633279	2.24855e-05	3.48321e-05		(3,1,0)	-0.3596	-0.1409	0.1477	0.088	-0.1224	-0.02775	0.09883
1.9	0	2	0.000968959	0.0190976	5.8e-06	2.45e-05	0.00462174	0.00682454	2.4471e-05	3.57793e-05		(3,0,1)	-0.1419	-1.685	0.02692	-0.05093	-2.422	-1.618	-0.7687
2.3	0	2	0.000852721	0.0208663	4.05e-06	2.75e-05	0.00498728	0.00772888	2.75007e-05	3.73134e-05		(2,2,0)	0.001659	-0.001438	-0.0008198	-0.0008572	-0.005989	-0.003774	-0.001294
2.5	0	2	0.000807353	0.0215163	3.17e-06	2.84e-05	0.00517185	0.00810514	2.83813e-05	3.76156e-05		(2,1,1)	-0.001914	-0.004258	0.000215	-0.0006123	-0.003674	2.966e-05	0.005101
2.7	0	2	0.00075987	0.0222184	2.22e-06	2.93e-05	0.00537073	0.00851582	2.93207e-05	3.8061e-05		(2,0,2)	-0.009946	-0.01685	0.004135	0.002572	-0.02895	-0.01374	-0.0004024
2.9	0	2	0.000718613	0.0228193	1.27e-06	3e-05	0.00557018	0.00889207	2.99766e-05	3.82859e-05		(1,3,0)	-8.104e-06	2.341e-05	3.536e-06	4.988e-06	8.3e-05	2.795e-05	-2.557e-06
1.5	0	4	0.000987617	0.0185093	6.86e-06	2.39e-05	0.00439982	0.00646033	2.38674e-05	3.54798e-05		(1,2,1)	-2.907e-05	9.877e-05	1.544e-05	1.401e-05	2.002e-05	-5.701e-05	-3.339e-05
1.7	0	4	0.000911148	0.0196074	6e-06	2.6e-05	0.00457814	0.00697516	2.59848e-05	3.65226e-05		(1,1,2)	2.551e-05	-3.74e-05	-1.907e-05	-2.386e-05	-1.687e-05	1.077e-05	9.011e-05
1.9	0	4	0.000845084	0.0205084	5.12e-06	2.76e-05	0.00476296	0.00743402	2.75631e-05	3.72482e-05		(1,0,3)	-8.966e-05	-0.0001916	3.155e-05	1.25e-05	-0.0002201	-8.733e-05	3.803e-05
2.1	0	4	0.000786302	0.02128	4.21e-06	2.88e-05	0.00495446	0.00785785	2.87554e-05	3.77352e-05		(0,4,0)	1.048e-06	-1.782e-07	-4.656e-07	-3.557e-07	1.663e-07	2.384e-07	2.682e-07
2.3	0	4	0.000732598	0.0219734	3.26e-06	2.97e-05	0.00515305	0.00826342	2.96894e-05	3.80799e-05		(0,3,1)	-2.839e-08	2.005e-07	1.796e-08	2.377e-08	7.718e-07	2.657e-07	1.196e-07
2.5	0	4	0.000683974	0.0225928	2.29e-06	3.04e-05	0.00535692	0.00864915	3.03834e-05	3.8274e-05		(0,2,2)	-1.98e-07	4.285e-07	7.376e-08	4.442e-08	3.596e-07	-2.446e-07	-8.995e-08
2.7	0	4	0.000638082	0.0231858	1.28e-06	3.1e-05	0.00556803	0.0090333	3.09575e-05	3.84286e-05		(0,1,3)	2.349e-07	-2.177e-07	-1.303e-07	-1.341e-07	-1.651e-07	8.405e-08	4.63e-07
2.9	0	4	0.000590477	0.0238336	2.04e-07	3.16e-05	0.00579313	0.0094522	3.15961e-05	3.8712e-05		(0,0,4)	-2.926e-07	-8.488e-07	7.951e-08	-7.095e-09	-6.972e-07	-3.592e-07	7.994e-08
1.5	0	6	0.000880829	0.0197164	6.4e-06	2.66e-05	0.00449593	0.00695344	2.66422e-05	3.67567e-05
1.7	0	6	0.000807826	0.0206131	5.5e-06	2.82e-05	0.00468353	0.00741274	2.82157e-05	3.73855e-05
1.9	0	6	0.00074135	0.0213998	4.56e-06	2.94e-05	0.00488122	0.0078472	2.94311e-05	3.78431e-05
2.1	0	6	0.000678969	0.0221319	3.56e-06	3.04e-05	0.0050897	0.0082755	3.04282e-05	3.82265e-05
2.3	0	6	0.000622355	0.0227873	2.53e-06	3.12e-05	0.00530519	0.00868498	3.11632e-05	3.84621e-05
2.5	0	6	0.000571451	0.0233728	1.48e-06	3.17e-05	0.0055257	0.00907481	3.16669e-05	3.85451e-05
2.7	0	6	0.000519277	0.0240092	3.59e-07	3.22e-05	0.00576049	0.00949786	3.22238e-05	3.87534e-05
2.9	0	6	0.000474565	0.0245462	-7.59e-07	3.25e-05	0.00599482	0.00988352	3.25042e-05	3.87301e-05
1.3	0	8	0.0008717	0.0196077	6.9e-06	2.68e-05	0.0043899	0.00683627	2.68296e-05	3.68425e-05
1.5	0	8	0.000789158	0.0205427	6e-06	2.85e-05	0.00457843	0.00730811	2.85216e-05	3.7443e-05
1.7	0	8	0.00071181	0.0213913	5.03e-06	2.99e-05	0.00478147	0.00776823	2.98953e-05	3.79795e-05
1.9	0	8	0.00064176	0.0221346	4.02e-06	3.09e-05	0.00499475	0.00820436	3.09077e-05	3.83353e-05
2.1	0	8	0.000580642	0.0227565	2.97e-06	3.15e-05	0.00521359	0.00860414	3.15358e-05	3.84364e-05
2.3	0	8	0.000521636	0.023375	1.87e-06	3.21e-05	0.00544418	0.00901473	3.20797e-05	3.85524e-05
2.5	0	8	0.000464491	0.0240005	7.14e-07	3.26e-05	0.00568614	0.00943943	3.25705e-05	3.86893e-05
2.7	0	8	0.000415462	0.0245241	-4.44e-07	3.28e-05	0.00592867	0.00982637	3.2771e-05	3.85821e-05
2.9	0	8	0.000365586	0.0251001	-1.66e-06	3.3e-05	0.00618444	0.0102453	3.3038e-05	3.85867e-05
1.5	0	10	0.000702924	0.0212047	5.63e-06	3e-05	0.00465604	0.00760422	2.99961e-05	3.79635e-05
1.7	0	10	0.000625935	0.0219375	4.62e-06	3.1e-05	0.00486906	0.00803496	3.09905e-05	3.82232e-05
1.9	0	10	0.000552781	0.02264	3.53e-06	3.18e-05	0.00509618	0.00847048	3.1808e-05	3.84739e-05
2.1	0	10	0.000484824	0.0232963	2.39e-06	3.24e-05	0.00533432	0.00890127	3.24209e-05	3.86341e-05
2.3	0	10	0.000423957	0.023878	1.23e-06	3.28e-05	0.00557898	0.00931124	3.27778e-05	3.8612e-05
2.5	0	10	0.000365512	0.0244662	5.56e-09	3.31e-05	0.00583461	0.00973391	3.30854e-05	3.86064e-05
2.7	0	10	0.000311485	0.0250252	-1.25e-06	3.33e-05	0.00609712	0.0101515	3.32708e-05	3.85184e-05
2.9	0	10	0.00026165	0.0255578	-2.53e-06	3.34e-05	0.00636529	0.0105633	3.3353e-05	3.83625e-05
2.3	1	-4	0.00179628	0.0103764	1.03e-05	1.06e-05	0.00368517	0.00371038	8.50912e-06	3.95732e-05
1.7	1	-2	0.00167857	0.0113862	9.74e-06	1.09e-05	0.00379538	0.00389405	1.00433e-05	3.9202e-05
2.3	1	-2	0.00129478	0.0163049	6.96e-06	1.86e-05	0.00437725	0.00567682	1.85924e-05	3.46788e-05
1.5	1	0	0.00141356	0.0138478	8.69e-06	1.43e-05	0.00401647	0.00462366	1.42803e-05	3.49745e-05
1.7	1	0	0.00130581	0.0150689	7.93e-06	1.64e-05	0.00417558	0.00512792	1.64439e-05	3.3348e-05
2.3	1	0	0.00104982	0.018313	5.35e-06	2.22e-05	0.00471529	0.00660671	2.21525e-05	3.46603e-05
2.5	1	0	0.000997278	0.0192468	4.53e-06	2.38e-05	0.00488696	0.00706158	2.37844e-05	3.55244e-05
1.5	1	2	0.00126928	0.0161801	8.07e-06	1.91e-05	0.00414633	0.00548722	1.90556e-05	3.30632e-05
1.7	1	2	0.00107155	0.0175526	6.79e-06	2.14e-05	0.00441453	0.00613626	2.14099e-05	3.43472e-05
2.3	1	2	0.000888599	0.0204622	4.29e-06	2.67e-05	0.00493777	0.00754395	2.66602e-05	3.69079e-05
2.5	1	2	0.00084134	0.0211759	3.41e-06	2.77e-05	0.00512087	0.00794046	2.77165e-05	3.73643e-05
2.7	1	2	0.000795828	0.0218657	2.5e-06	2.87e-05	0.00531248	0.00833895	2.86601e-05	3.77914e-05
2.9	1	2	0.000756394	0.0224529	1.58e-06	2.93e-05	0.00550444	0.00870245	2.93205e-05	3.79996e-05
1.5	1	4	0.00138887	0.0174474	8.58e-06	2.26e-05	0.00403869	0.00584131	2.25803e-05	3.37375e-05
1.7	1	4	0.000936123	0.0193237	6.13e-06	2.53e-05	0.00455267	0.00685596	2.5347e-05	3.62277e-05
1.9	1	4	0.000871888	0.0202203	5.27e-06	2.69e-05	0.0047324	0.00730731	2.69303e-05	3.69266e-05
2.1	1	4	0.000810971	0.0210561	4.36e-06	2.83e-05	0.00492337	0.00775231	2.82968e-05	3.75747e-05
2.3	1	4	0.000758901	0.0217415	3.43e-06	2.92e-05	0.00511675	0.00814952	2.92363e-05	3.79038e-05
2.5	1	4	0.000707615	0.0224266	2.46e-06	3.01e-05	0.00532146	0.00855951	3.01067e-05	3.82609e-05
2.7	1	4	0.000663084	0.0230109	1.47e-06	3.07e-05	0.00552753	0.00893564	3.06852e-05	3.8402e-05
2.9	1	4	0.000616809	0.023649	4.22e-07	3.13e-05	0.00574732	0.0093458	3.13273e-05	3.86733e-05
1.5	1	6	0.000898097	0.019548	6.47e-06	2.63e-05	0.00448038	0.0068826	2.62581e-05	3.66249e-05
1.7	1	6	0.000826673	0.0204407	5.59e-06	2.78e-05	0.00466431	0.00733642	2.7835e-05	3.7234e-05
1.9	1	6	0.000757658	0.0212932	4.65e-06	2.92e-05	0.00486262	0.00779413	2.92278e-05	3.78559e-05
2.1	1	6	0.000700718	0.0219478	3.69e-06	3.01e-05	0.00506229	0.00818613	3.0057e-05	3.80477e-05
2.3	1	6	0.000641206	0.0226694	2.66e-06	3.1e-05	0.00527917	0.0086206	3.09693e-05	3.84484e-05
2.5	1	6	0.000591468	0.0232476	1.62e-06	3.15e-05	0.00549568	0.00900397	3.14759e-05	3.85197e-05
2.7	1	6	0.000540432	0.0238762	5.23e-07	3.2e-05	0.00572622	0.00942009	3.20357e-05	3.87194e-05
2.9	1	6	0.000496763	0.0244049	-5.75e-07	3.23e-05	0.0059562	0.00979863	3.23185e-05	3.86891e-05
1.3	1	8	0.00088854	0.0194214	6.97e-06	2.64e-05	0.00437677	0.00676152	2.63813e-05	3.65813e-05
1.5	1	8	0.000803546	0.020422	6.06e-06	2.82e-05	0.00456548	0.00725536	2.8249e-05	3.73459e-05
1.7	1	8	0.000727504	0.0212672	5.11e-06	2.96e-05	0.00476546	0.00771096	2.9628e-05	3.78692e-05
1.9	1	8	0.000658679	0.0220059	4.11e-06	3.06e-05	0.00497546	0.00814195	3.06454e-05	3.82131e-05
2.1	1	8	0.00059448	0.0226935	3.05e-06	3.14e-05	0.00519615	0.00856708	3.1449e-05	3.84801e-05
2.3	1	8	0.000536494	0.0233067	1.97e-06	3.2e-05	0.00542368	0.00897297	3.19954e-05	3.85879e-05
2.5	1	8	0.000480315	0.0239262	8.28e-07	3.25e-05	0.00566241	0.00939254	3.24877e-05	3.87171e-05
2.7	1	8	0.000432143	0.0244439	-3.15e-07	3.27e-05	0.00590165	0.00977446	3.26905e-05	3.86054e-05
2.9	1	8	0.000383061	0.0250138	-1.52e-06	3.3e-05	0.00615404	0.0101882	3.29599e-05	3.86067e-05
1.5	1	10	0.000713856	0.0211371	5.68e-06	2.99e-05	0.0046462	0.00757235	2.98542e-05	3.79463e-05
1.7	1	10	0.00063794	0.0218667	4.67e-06	3.09e-05	0.00485681	0.00799955	3.08528e-05	3.81947e-05
1.9	1	10	0.000565825	0.0225647	3.6e-06	3.17e-05	0.00508132	0.00843089	3.16728e-05	3.84358e-05
2.1	1	10	0.000498847	0.023216	2.48e-06	3.23e-05	0.00531665	0.0088571	3.22878e-05	3.85891e-05
2.3	1	10	0.000438846	0.0237923	1.32e-06	3.26e-05	0.00555843	0.00926239	3.26471e-05	3.85628e-05
2.5	1	10	0.000381207	0.0243749	1.18e-07	3.3e-05	0.00581107	0.00968016	3.2957e-05	3.85542e-05
2.7	1	10	0.00032788	0.0249283	-1.12e-06	3.31e-05	0.00607056	0.0100929	3.31451e-05	3.84648e-05
2.9	1	10	0.000278678	0.0254553	-2.39e-06	3.32e-05	0.00633566	0.0104998	3.32299e-05	3.8308e-05
1.9	2	-2	0.001632	0.0137574	9.41e-06	1.45e-05	0.00386588	0.00450773	1.44773e-05	3.86934e-05
2.3	2	-2	0.00141856	0.0138294	7.78e-06	1.38e-05	0.00420642	0.004723	1.37757e-05	3.25353e-05
1.5	2	0	0.00149795	0.0129859	9.05e-06	1.27e-05	0.00394052	0.00429531	1.27282e-05	3.67809e-05
1.7	2	0	0.00136832	0.0144226	8.23e-06	1.52e-05	0.00411183	0.00487126	1.52324e-05	3.47558e-05
2.3	2	0	0.00123455	0.0196593	6.57e-06	2.66e-05	0.00446036	0.00690695	2.66487e-05	3.82386e-05
1.5	2	2	0.00119639	0.0155766	7.75e-06	1.75e-05	0.00421192	0.00532308	1.74597e-05	3.22855e-05
1.7	2	2	0.00110725	0.0170234	6.96e-06	2.03e-05	0.00437811	0.00592756	2.02642e-05	3.3719e-05
2.3	2	2	0.000918985	0.020105	4.49e-06	2.59e-05	0.00489584	0.00738272	2.59149e-05	3.65629e-05
2.5	2	2	0.000869496	0.0208868	3.61e-06	2.71e-05	0.00507864	0.00780206	2.71493e-05	3.71738e-05
2.7	2	2	0.000825647	0.0215669	2.73e-06	2.81e-05	0.00526417	0.00819062	2.80971e-05	3.75827e-05
2.9	2	2	0.000783642	0.0222215	1.81e-06	2.89e-05	0.00545703	0.00857903	2.89332e-05	3.79533e-05
1.5	2	4	0.00103481	0.0179019	7.06e-06	2.25e-05	0.00435734	0.00621918	2.24897e-05	3.48417e-05
1.7	2	4	0.000956593	0.0190872	6.23e-06	2.48e-05	0.00453179	0.00675718	2.48177e-05	3.60052e-05
2.1	2	4	0.000834413	0.0208114	4.5e-06	2.78e-05	0.00489384	0.00764065	2.77771e-05	3.73104e-05
2.3	2	4	0.000779716	0.0215633	3.57e-06	2.89e-05	0.00508803	0.00806169	2.88927e-05	3.78049e-05
2.5	2	4	0.000729729	0.0222407	2.61e-06	2.98e-05	0.00528829	0.00846426	2.97658e-05	3.81501e-05
2.7	2	4	0.000686386	0.0228169	1.65e-06	3.03e-05	0.00548978	0.00883284	3.03483e-05	3.828e-05
2.9	2	4	0.000641264	0.023446	6.26e-07	3.1e-05	0.00570476	0.00923483	3.09937e-05	3.85413e-05
1.5	2	6	0.00168198	0.0175647	9.84e-06	2.4e-05	0.00377489	0.00568765	2.39888e-05	3.31326e-05
1.7	2	6	0.00084081	0.0203211	5.66e-06	2.76e-05	0.00464989	0.00728275	2.75765e-05	3.7175e-05
1.9	2	6	0.000773032	0.0211695	4.73e-06	2.9e-05	0.0048451	0.0077357	2.89725e-05	3.77842e-05
2.1	2	6	0.000713083	0.0218916	3.77e-06	3e-05	0.00504671	0.00815349	2.99788e-05	3.81424e-05
2.3	2	6	0.000658776	0.0225352	2.77e-06	3.07e-05	0.00525493	0.00855146	3.0722e-05	3.83553e-05
2.5	2	6	0.000605749	0.023182	1.73e-06	3.14e-05	0.00547426	0.00896268	3.14036e-05	3.85933e-05
2.7	2	6	0.000559984	0.023728	6.74e-07	3.18e-05	0.00569455	0.00933842	3.17938e-05	3.86092e-05
2.9	2	6	0.000512777	0.0243279	-4.42e-07	3.23e-05	0.00592833	0.00974751	3.22504e-05	3.87483e-05
1.3	2	8	0.000901146	0.0192881	7.01e-06	2.61e-05	0.00436694	0.00670784	2.60643e-05	3.64257e-05
1.5	2	8	0.000813413	0.0203553	6.11e-06	2.81e-05	0.0045566	0.00722495	2.81069e-05	3.73562e-05
1.7	2	8	0.000738392	0.0211982	5.16e-06	2.95e-05	0.00475435	0.0076775	2.94905e-05	3.78681e-05
1.9	2	8	0.000670523	0.0219337	4.17e-06	3.05e-05	0.00496196	0.00810497	3.05119e-05	3.82015e-05
2.1	2	8	0.000607241	0.0226171	3.13e-06	3.13e-05	0.00518007	0.00852606	3.13183e-05	3.84592e-05
2.3	2	8	0.000550125	0.0232254	2.06e-06	3.19e-05	0.00540487	0.00892753	3.18667e-05	3.85599e-05
2.5	2	8	0.000494773	0.0238395	9.31e-07	3.24e-05	0.00564072	0.0093424	3.2361e-05	3.86829e-05
2.7	2	8	0.000442855	0.0244287	-2.32e-07	3.27e-05	0.0058843	0.00975567	3.2736e-05	3.87421e-05
2.9	2	8	0.000398943	0.0249158	-1.39e-06	3.28e-05	0.0061264	0.0101283	3.28368e-05	3.85655e-05
1.5	2	10	0.000724183	0.0210577	5.72e-06	2.97e-05	0.00463691	0.00753672	2.96764e-05	3.78716e-05
1.7	2	10	0.000649182	0.0217843	4.73e-06	3.07e-05	0.00484535	0.00796056	3.06786e-05	3.81108e-05
1.9	2	10	0.000577954	0.0224783	3.67e-06	3.15e-05	0.00506749	0.00838799	3.1501e-05	3.8344e-05
2.1	2	10	0.000511816	0.0231247	2.56e-06	3.21e-05	0.00530031	0.00880986	3.21177e-05	3.84914e-05
2.3	2	10	0.00044813	0.0237698	1.39e-06	3.27e-05	0.00554562	0.00924398	3.26503e-05	3.86376e-05
2.5	2	10	0.000391107	0.0243488	1.89e-07	3.3e-05	0.00579622	0.00965879	3.29611e-05	3.86253e-05
2.7	2	10	0.000338322	0.0248989	-1.04e-06	3.32e-05	0.00605364	0.0100686	3.31508e-05	3.85338e-05
2.9	2	10	0.000289613	0.0254226	-2.3e-06	3.32e-05	0.00631664	0.0104727	3.32375e-05	3.83757e-05
1.9	3	-2	0.00179671	0.0100745	1.03e-05	1.05e-05	0.00367811	0.0036986	8.03154e-06	3.30668e-05
2.3	3	-2	0.00158162	0.0123035	8.85e-06	1.14e-05	0.00398141	0.0042041	1.1343e-05	3.54004e-05
1.5	3	0	0.0015931	0.0120716	9.46e-06	1.12e-05	0.00385488	0.00399323	1.11687e-05	3.74419e-05
1.7	3	0	0.00143454	0.0137474	8.55e-06	1.4e-05	0.00404428	0.0046057	1.40049e-05	3.59132e-05
2.3	3	0	0.00123063	0.0189552	6.54e-06	2.48e-05	0.00446577	0.00666345	2.47512e-05	3.75662e-05
1.5	3	2	0.0012873	0.0152134	8.14e-06	1.69e-05	0.0041301	0.00514951	1.68945e-05	3.2112e-05
1.7	3	2	0.00125517	0.0163785	7.68e-06	1.93e-05	0.00422724	0.005607	1.92523e-05	3.28634e-05
1.9	3	2	0.00106066	0.0178572	6.3e-06	2.18e-05	0.00451721	0.00631201	2.17759e-05	3.45123e-05
2.1	3	2	0.000997489	0.018916	5.48e-06	2.37e-05	0.00468836	0.00680578	2.37418e-05	3.55185e-05
2.3	3	2	0.000944296	0.0197873	4.65e-06	2.52e-05	0.00486091	0.0072417	2.52469e-05	3.62343e-05
2.5	3	2	0.000896113	0.0205652	3.81e-06	2.65e-05	0.00503871	0.00765382	2.64904e-05	3.68239e-05
1.5	3	4	0.00105439	0.0176277	7.14e-06	2.19e-05	0.00433972	0.00611194	2.18721e-05	3.45031e-05
1.7	3	4	0.000976571	0.0188231	6.32e-06	2.42e-05	0.00451141	0.00664933	2.4219e-05	3.56483e-05
2.1	3	4	0.000848814	0.0206878	4.58e-06	2.75e-05	0.00487569	0.00758205	2.753e-05	3.7278e-05
2.3	3	4	0.000795187	0.021435	3.67e-06	2.86e-05	0.00506668	0.0079981	2.86486e-05	3.77608e-05
2.5	3	4	0.000746216	0.0221066	2.73e-06	2.95e-05	0.00526356	0.00839515	2.95239e-05	3.80966e-05
2.7	3	4	0.000703793	0.0226767	1.79e-06	3.01e-05	0.00546158	0.00875808	3.01092e-05	3.82171e-05
2.9	3	4	0.000659563	0.0232991	7.78e-07	3.08e-05	0.00567292	0.00915399	3.07571e-05	3.84704e-05
1.5	3	6	0.00092723	0.0192241	6.6e-06	2.55e-05	0.00445417	0.00674955	2.55088e-05	3.62562e-05
1.7	3	6	0.000854255	0.0201817	5.73e-06	2.73e-05	0.00463617	0.00722264	2.7262e-05	3.70144e-05
1.9	3	6	0.000787509	0.0210263	4.81e-06	2.87e-05	0.00482859	0.00767106	2.86598e-05	3.76142e-05
2.1	3	6	0.000728503	0.0217438	3.86e-06	2.97e-05	0.00502728	0.00808394	2.96688e-05	3.79643e-05
2.3	3	6	0.000670885	0.0224561	2.85e-06	3.06e-05	0.00523822	0.00850897	3.0588e-05	3.83468e-05
2.5	3	6	0.000618617	0.0230984	1.82e-06	3.13e-05	0.00545496	0.00891603	3.12719e-05	3.85771e-05
2.7	3	6	0.000573571	0.0236393	7.79e-07	3.17e-05	0.00567254	0.00928739	3.16639e-05	3.85868e-05
2.9	3	6	0.000527057	0.0242338	-3.23e-07	3.21e-05	0.00590348	0.00969178	3.2122e-05	3.87207e-05
1.3	3	8	0.000909593	0.0192068	7.04e-06	2.59e-05	0.00436035	0.00667472	2.58744e-05	3.63669e-05
1.5	3	8	0.000822733	0.020273	6.15e-06	2.79e-05	0.00454821	0.00718938	2.79194e-05	3.72859e-05
1.7	3	8	0.000748553	0.0211137	5.21e-06	2.93e-05	0.00474399	0.00763901	2.93062e-05	3.77895e-05
1.9	3	8	0.000681464	0.0218462	4.23e-06	3.03e-05	0.00494949	0.00806314	3.03306e-05	3.81149e-05
2.1	3	8	0.000618929	0.0225259	3.2e-06	3.11e-05	0.00516535	0.0084805	3.11395e-05	3.83655e-05
2.3	3	8	0.000558214	0.0232032	2.11e-06	3.19e-05	0.0053937	0.00891062	3.18619e-05	3.86375e-05
2.5	3	8	0.000507851	0.0237388	1.02e-06	3.22e-05	0.0056211	0.00928836	3.21856e-05	3.8579e-05
2.7	3	8	0.000456551	0.0243229	-1.26e-07	3.26e-05	0.00586211	0.00969715	3.25626e-05	3.86354e-05
2.9	3	8	0.000408651	0.0248838	-1.31e-06	3.28e-05	0.00610951	0.0101032	3.28353e-05	3.86312e-05
1.5	3	10	0.000733918	0.0209653	5.77e-06	2.95e-05	0.00462815	0.00749693	2.946e-05	3.77336e-05
1.7	3	10	0.000655552	0.0217583	4.76e-06	3.06e-05	0.00483885	0.00794605	3.06382e-05	3.81444e-05
1.9	3	10	0.000584941	0.02245	3.71e-06	3.15e-05	0.00505952	0.0083713	3.14622e-05	3.83712e-05
2.1	3	10	0.000519391	0.0230937	2.6e-06	3.21e-05	0.00529076	0.00879076	3.20801e-05	3.85134e-05
2.3	3	10	0.000456244	0.0237358	1.44e-06	3.26e-05	0.00553442	0.00922234	3.26139e-05	3.86563e-05
2.5	3	10	0.000399715	0.0243117	2.51e-07	3.29e-05	0.00578331	0.00963453	3.29259e-05	3.86414e-05
2.7	3	10	0.000347364	0.0248588	-9.7e-07	3.31e-05	0.00603899	0.0100418	3.31169e-05	3.85484e-05
2.9	3	10	0.000299049	0.0253794	-2.22e-06	3.32e-05	0.00630022	0.0104431	3.32047e-05	3.83891e-05
2.3	4	-2	0.00174992	0.0108719	9.96e-06	1.07e-05	0.00374915	0.003817	9.23333e-06	3.87344e-05
1.5	4	0	0.00167263	0.0113111	9.8e-06	1.08e-05	0.0037833	0.00387393	9.9328e-06	3.83626e-05
1.7	4	0	0.00149062	0.0131764	8.83e-06	1.3e-05	0.00398708	0.00438363	1.29965e-05	3.70505e-05
2.3	4	0	0.00123603	0.0183886	6.58e-06	2.33e-05	0.00445832	0.00645908	2.33231e-05	3.70475e-05
1.5	4	2	0.00125459	0.015124	8e-06	1.66e-05	0.00415954	0.00513703	1.66108e-05	3.31682e-05
1.7	4	2	0.00125565	0.0161278	7.68e-06	1.87e-05	0.00422675	0.00552087	1.86691e-05	3.26431e-05
1.9	4	2	0.00108046	0.0175648	6.4e-06	2.11e-05	0.00449463	0.00619377	2.11493e-05	3.41839e-05
2.3	4	2	0.000960996	0.0195797	4.76e-06	2.48e-05	0.00483786	0.00714972	2.48138e-05	3.60578e-05
2.5	4	2	0.000913622	0.0203561	3.93e-06	2.61e-05	0.00501245	0.00755761	2.60654e-05	3.66312e-05
1.5	4	4	0.0010662	0.0174698	7.19e-06	2.15e-05	0.00432909	0.00605002	2.15213e-05	3.43615e-05
1.7	4	4	0.000988563	0.0186727	6.38e-06	2.39e-05	0.00449918	0.00658762	2.38829e-05	3.54941e-05
2.1	4	4	0.000862285	0.020536	4.66e-06	2.72e-05	0.00485872	0.0075141	2.72033e-05	3.7098e-05
2.3	4	4	0.000809483	0.0212791	3.77e-06	2.83e-05	0.00504695	0.00792552	2.83235e-05	3.75732e-05
2.5	4	4	0.000761309	0.0219452	2.84e-06	2.92e-05	0.00524092	0.00831736	2.91995e-05	3.79029e-05
2.7	4	4	0.000715395	0.0225869	1.88e-06	3e-05	0.00544278	0.00870977	2.99596e-05	3.81948e-05
2.9	4	4	0.000671781	0.0232048	8.79e-07	3.06e-05	0.00565166	0.0091016	3.0609e-05	3.84418e-05
1.5	4	6	0.00093547	0.0191343	6.63e-06	2.53e-05	0.00444675	0.00671265	2.5303e-05	3.61723e-05
1.7	4	6	0.000859279	0.0201611	5.75e-06	2.72e-05	0.00463105	0.00721148	2.72298e-05	3.71003e-05
1.9	4	6	0.000797133	0.0209329	4.86e-06	2.85e-05	0.00481762	0.00762882	2.84573e-05	3.75132e-05
2.1	4	6	0.000734678	0.0217199	3.9e-06	2.96e-05	0.0050195	0.00806923	2.9641e-05	3.80354e-05
2.3	4	6	0.000681771	0.0223563	2.92e-06	3.04e-05	0.00522319	0.00845999	3.03897e-05	3.82349e-05
2.5	4	6	0.000630074	0.0229945	1.9e-06	3.11e-05	0.00543777	0.00886322	3.1075e-05	3.846e-05
2.7	4	6	0.000581228	0.0236081	8.39e-07	3.16e-05	0.00566013	0.009266	3.16407e-05	3.86416e-05
2.9	4	6	0.000535166	0.0241995	-2.56e-07	3.21e-05	0.00588937	0.00966781	3.20997e-05	3.87715e-05
1.3	4	8	0.000913939	0.0191766	7.06e-06	2.58e-05	0.00435696	0.00666173	2.58082e-05	3.6397e-05
1.5	4	8	0.000831538	0.0201736	6.19e-06	2.77e-05	0.00454029	0.0071482	2.76835e-05	3.71272e-05
1.7	4	8	0.00075399	0.0210819	5.24e-06	2.92e-05	0.00473844	0.00762327	2.92448e-05	3.78044e-05
1.9	4	8	0.0006874	0.0218128	4.26e-06	3.03e-05	0.00494272	0.00804567	3.02714e-05	3.81243e-05
2.1	4	8	0.000625341	0.0224904	3.24e-06	3.11e-05	0.00515727	0.00846104	3.10819e-05	3.83698e-05
2.3	4	8	0.000569392	0.0230918	2.18e-06	3.16e-05	0.00537828	0.00885625	3.16335e-05	3.84611e-05
2.5	4	8	0.00051515	0.0236982	1.08e-06	3.21e-05	0.00561016	0.00926435	3.21301e-05	3.85753e-05
2.7	4	8	0.00046425	0.0242796	-6.62e-08	3.25e-05	0.00584964	0.00967072	3.25082e-05	3.86297e-05
2.9	4	8	0.000416715	0.0248375	-1.24e-06	3.28e-05	0.00609548	0.0100742	3.27818e-05	3.86236e-05
1.5	4	10	0.00073908	0.0209274	5.79e-06	2.94e-05	0.0046235	0.00747978	2.93763e-05	3.7707e-05
1.7	4	10	0.000661191	0.021719	4.79e-06	3.06e-05	0.0048331	0.00792726	3.05566e-05	3.81128e-05
1.9	4	10	0.000591038	0.0224087	3.74e-06	3.14e-05	0.00505257	0.00835057	3.13819e-05	3.83352e-05
2.1	4	10	0.000525924	0.02305	2.64e-06	3.2e-05	0.00528253	0.00876787	3.20007e-05	3.8474e-05
2.3	4	10	0.000463175	0.0236896	1.48e-06	3.25e-05	0.00552486	0.00919718	3.25355e-05	3.86149e-05
2.5	4	10	0.000407012	0.0242629	3.03e-07	3.28e-05	0.00577236	0.00960704	3.28486e-05	3.85985e-05
2.7	4	10	0.000354981	0.0248073	-9.11e-07	3.3e-05	0.00602665	0.010012	3.30409e-05	3.85048e-05
2.9	4	10	0.000302343	0.0254045	-2.19e-06	3.33e-05	0.00629449	0.0104493	3.32984e-05	3.85178e-05
2.3	5	-2	0.0018158	0.0101046	1.04e-05	1.05e-05	0.00365824	0.0036655	8.10891e-06	3.98334e-05
1.5	5	0	0.00171567	0.0108716	9.98e-06	1.07e-05	0.00374457	0.00380937	9.24047e-06	3.87725e-05
1.7	5	0	0.00152753	0.0128235	9.01e-06	1.24e-05	0.00394943	0.00424633	1.23922e-05	3.72795e-05
2.3	5	0	0.00124324	0.0180053	6.62e-06	2.24e-05	0.00444837	0.00631767	2.23989e-05	3.66486e-05
2.5	5	0	0.00113794	0.0170688	5.54e-06	1.94e-05	0.00467597	0.00613346	1.93713e-05	3.32224e-05
1.5	5	2	0.00131363	0.0149201	8.26e-06	1.63e-05	0.0041064	0.00503606	1.6317e-05	3.29677e-05
1.7	5	2	0.00125779	0.0159644	7.69e-06	1.83e-05	0.00422456	0.00546357	1.82997e-05	3.24694e-05
1.9	5	2	0.00109236	0.0173826	6.47e-06	2.08e-05	0.00448106	0.00612063	2.07605e-05	3.3956e-05
2.3	5	2	0.000973195	0.0194033	4.84e-06	2.44e-05	0.00482103	0.0070737	2.44365e-05	3.58168e-05
1.5	5	4	0.00107407	0.0173557	7.23e-06	2.13e-05	0.00432201	0.00600576	2.12671e-05	3.42161e-05
1.7	5	4	0.00137163	0.0175824	8.25e-06	2.27e-05	0.00410845	0.00593612	2.26515e-05	3.36358e-05
2.1	5	4	0.000867052	0.0204993	4.69e-06	2.71e-05	0.00485271	0.00749632	2.7133e-05	3.71132e-05
2.3	5	4	0.000814635	0.0212408	3.8e-06	2.83e-05	0.00503984	0.0079061	2.82544e-05	3.75835e-05
2.5	5	4	0.000766834	0.021905	2.88e-06	2.91e-05	0.00523263	0.00829609	2.91312e-05	3.79093e-05
2.7	5	4	0.000721264	0.0225447	1.92e-06	2.99e-05	0.00543327	0.00868659	2.98923e-05	3.81975e-05
2.9	5	4	0.000677976	0.0231604	9.3e-07	3.05e-05	0.00564088	0.00907638	3.05427e-05	3.84415e-05
1.5	5	6	0.000939591	0.0190912	6.65e-06	2.52e-05	0.00444304	0.00669484	2.5205e-05	3.61414e-05
1.7	5	6	0.000867644	0.0200472	5.79e-06	2.7e-05	0.00462252	0.00716447	2.69617e-05	3.68834e-05
1.9	5	6	0.000801972	0.0208881	4.89e-06	2.84e-05	0.00481211	0.00760837	2.83613e-05	3.74726e-05
2.1	5	6	0.000739862	0.0216736	3.93e-06	2.95e-05	0.00501297	0.00804713	2.9546e-05	3.7992e-05
2.3	5	6	0.000687272	0.0223082	2.96e-06	3.03e-05	0.0052156	0.00843612	3.02957e-05	3.81883e-05
2.5	5	6	0.000635876	0.0229443	1.94e-06	3.1e-05	0.00542907	0.00883743	3.09818e-05	3.84105e-05
2.7	5	6	0.000587319	0.0235556	8.86e-07	3.15e-05	0.00565026	0.00923817	3.15483e-05	3.85898e-05
2.9	5	6	0.000541532	0.0241447	-2.03e-07	3.2e-05	0.0058783	0.00963789	3.20084e-05	3.87181e-05
1.3	5	8	0.000918016	0.0191288	7.08e-06	2.57e-05	0.00435378	0.00664278	2.56937e-05	3.63293e-05
1.5	5	8	0.000832055	0.020194	6.19e-06	2.77e-05	0.00453982	0.00715506	2.77416e-05	3.72353e-05
1.7	5	8	0.000758748	0.0210325	5.26e-06	2.91e-05	0.00473359	0.00760175	2.91316e-05	3.77298e-05
1.9	5	8	0.000692471	0.0217621	4.29e-06	3.02e-05	0.00493694	0.00802258	3.01593e-05	3.8047e-05
2.1	5	8	0.00063071	0.022438	3.27e-06	3.1e-05	0.0051505	0.00843619	3.09707e-05	3.82897e-05
2.3	5	8	0.000570744	0.023111	2.19e-06	3.17e-05	0.00537641	0.00886221	3.16954e-05	3.85559e-05
2.5	5	8	0.000516687	0.0237169	1.09e-06	3.22e-05	0.00560785	0.00926994	3.21923e-05	3.86682e-05
2.7	5	8	0.00046596	0.0242977	-5.29e-08	3.26e-05	0.00584687	0.00967589	3.25704e-05	3.87205e-05
2.9	5	8	0.000418586	0.0248551	-1.22e-06	3.28e-05	0.00609222	0.010079	3.28442e-05	3.8713e-05
1.5	5	10	0.000739692	0.0209434	5.79e-06	2.94e-05	0.00462295	0.00748509	2.94241e-05	3.77887e-05
1.7	5	10	0.000661996	0.0217348	4.79e-06	3.06e-05	0.00483228	0.00793239	3.06052e-05	3.81912e-05
1.9	5	10	0.000592026	0.0224242	3.74e-06	3.14e-05	0.00505145	0.00835547	3.1431e-05	3.8411e-05
2.1	5	10	0.000527088	0.0230651	2.65e-06	3.21e-05	0.00528107	0.0087725	3.20501e-05	3.85476e-05
2.3	5	10	0.00046892	0.0236306	1.52e-06	3.24e-05	0.00551693	0.00916832	3.24138e-05	3.85108e-05
2.5	5	10	0.000408494	0.024277	3.13e-07	3.29e-05	0.00577014	0.00961099	3.28981e-05	3.86689e-05
2.7	5	10	0.0003566	0.0248211	-8.99e-07	3.31e-05	0.00602403	0.0100156	3.30906e-05	3.85743e-05
2.9	5	10	0.0003087	0.0253386	-2.14e-06	3.32e-05	0.00628342	0.0104143	3.31798e-05	3.84137e-05
1.5	6	0	0.00171629	0.0108463	9.99e-06	1.07e-05	0.00374401	0.00380844	9.1985e-06	3.87241e-05
1.7	6	0	0.00153413	0.0127719	9.04e-06	1.23e-05	0.0039427	0.0042257	1.23075e-05	3.74029e-05
2.3	6	0	0.00124533	0.0179236	6.64e-06	2.22e-05	0.00444548	0.00628702	2.22069e-05	3.65249e-05
1.5	6	2	0.00131346	0.0149083	8.26e-06	1.63e-05	0.00410655	0.00503214	1.62906e-05	3.29403e-05
1.7	6	2	0.0012574	0.0159701	7.69e-06	1.83e-05	0.00422497	0.00546577	1.83115e-05	3.25085e-05
1.9	6	2	0.00109237	0.0173876	6.47e-06	2.08e-05	0.00448105	0.00612242	2.07727e-05	3.39913e-05
2.3	6	2	0.000973254	0.0194089	4.85e-06	2.45e-05	0.00482095	0.0070757	2.4451e-05	3.58496e-05
2.5	6	2	0.000922436	0.0202612	3.99e-06	2.59e-05	0.00499923	0.00751313	2.58785e-05	3.65927e-05
1.5	6	4	0.00107408	0.0173593	7.23e-06	2.13e-05	0.004322	0.006007	2.12759e-05	3.42403e-05
1.7	6	4	0.00137077	0.0175894	8.24e-06	2.27e-05	0.00410933	0.00593908	2.26659e-05	3.36651e-05
2.1	6	4	0.000867141	0.0205032	4.69e-06	2.71e-05	0.0048526	0.00749768	2.71439e-05	3.71344e-05
2.3	6	4	0.000814755	0.0212447	3.8e-06	2.83e-05	0.00503968	0.00790743	2.82655e-05	3.76039e-05
2.5	6	4	0.000766985	0.0219089	2.88e-06	2.91e-05	0.0052324	0.0082974	2.91426e-05	3.79295e-05
2.7	6	4	0.000721444	0.0225485	1.92e-06	2.99e-05	0.00543298	0.00868783	2.99037e-05	3.82171e-05
2.9	6	4	0.000678183	0.0231641	9.32e-07	3.06e-05	0.00564053	0.00907757	3.05542e-05	3.84606e-05
1.5	6	6	0.000939624	0.0190941	6.65e-06	2.52e-05	0.00444301	0.00669582	2.52127e-05	3.61577e-05
1.7	6	6	0.000867705	0.0200502	5.79e-06	2.7e-05	0.00462246	0.00716548	2.69699e-05	3.6899e-05
1.9	6	6	0.000802062	0.020891	4.89e-06	2.84e-05	0.00481201	0.00760934	2.83696e-05	3.74876e-05
2.1	6	6	0.00073998	0.0216764	3.93e-06	2.96e-05	0.00501282	0.00804807	2.95544e-05	3.80064e-05
2.3	6	6	0.000687414	0.022311	2.96e-06	3.03e-05	0.00521541	0.00843704	3.03043e-05	3.82025e-05
2.5	6	6	0.000636041	0.0229471	1.94e-06	3.1e-05	0.00542882	0.00883832	3.09905e-05	3.84244e-05
2.7	6	6	0.000587508	0.0235583	8.87e-07	3.16e-05	0.00564996	0.00923901	3.15571e-05	3.86035e-05
2.9	6	6	0.000541743	0.0241473	-2.01e-07	3.2e-05	0.00587793	0.00963867	3.20171e-05	3.87314e-05
1.3	6	8	0.000918046	0.0191311	7.08e-06	2.57e-05	0.00435375	0.00664354	2.56998e-05	3.63417e-05
1.5	6	8	0.000832111	0.0201962	6.19e-06	2.77e-05	0.00453977	0.00715579	2.77478e-05	3.7247e-05
1.7	6	8	0.000758829	0.0210347	5.26e-06	2.91e-05	0.00473351	0.00760248	2.91381e-05	3.77411e-05
1.9	6	8	0.000692574	0.0217643	4.29e-06	3.02e-05	0.00493682	0.00802329	3.01659e-05	3.80579e-05
2.1	6	8	0.000630835	0.0224401	3.27e-06	3.1e-05	0.00515034	0.00843688	3.09775e-05	3.83004e-05
2.3	6	8	0.000570891	0.0231131	2.19e-06	3.17e-05	0.00537621	0.00886286	3.17022e-05	3.85664e-05
2.5	6	8	0.000516853	0.0237189	1.09e-06	3.22e-05	0.0056076	0.00927054	3.2199e-05	3.86782e-05
2.7	6	8	0.000466145	0.0242996	-5.15e-08	3.26e-05	0.00584657	0.00967646	3.25772e-05	3.87304e-05
2.9	6	8	0.000418788	0.024857	-1.22e-06	3.29e-05	0.00609187	0.0100795	3.28509e-05	3.87227e-05
1.5	6	10	0.000739758	0.0209451	5.79e-06	2.94e-05	0.00462289	0.00748566	2.94292e-05	3.77974e-05
1.7	6	10	0.000662083	0.0217365	4.79e-06	3.06e-05	0.00483219	0.00793295	3.06105e-05	3.81998e-05
1.9	6	10	0.000592133	0.0224258	3.75e-06	3.14e-05	0.00505132	0.008356	3.14363e-05	3.84192e-05
2.1	6	10	0.000527214	0.0230667	2.65e-06	3.21e-05	0.00528091	0.00877299	3.20554e-05	3.85555e-05
2.3	6	10	0.000469063	0.0236322	1.52e-06	3.24e-05	0.00551673	0.0091688	3.24192e-05	3.85187e-05
2.5	6	10	0.000408655	0.0242786	3.15e-07	3.29e-05	0.0057699	0.00961142	3.29035e-05	3.86766e-05
2.7	6	10	0.000356775	0.0248226	-8.97e-07	3.31e-05	0.00602375	0.010016	3.3096e-05	3.85818e-05
2.9	6	10	0.000308888	0.02534	-2.14e-06	3.32e-05	0.0062831	0.0104146	3.31852e-05	3.84212e-05
2.3	7	-2	0.00177726	0.0105991	1.01e-05	1.06e-05	0.00371142	0.00375412	8.83602e-06	3.92616e-05
1.5	7	0	0.00168921	0.0111565	9.87e-06	1.08e-05	0.00376838	0.00384906	9.68934e-06	3.8562e-05
1.7	7	0	0.00150397	0.0130583	8.89e-06	1.28e-05	0.00397347	0.00433702	1.27954e-05	3.72542e-05
2.3	7	0	0.00124382	0.0180644	6.63e-06	2.25e-05	0.00444757	0.00633786	2.25492e-05	3.64995e-05
1.5	7	2	0.00130444	0.014997	8.22e-06	1.65e-05	0.00411467	0.00506697	1.64616e-05	3.26647e-05
1.7	7	2	0.0012563	0.0160733	7.69e-06	1.85e-05	0.00422609	0.0055018	1.85453e-05	3.25815e-05
1.9	7	2	0.00108442	0.0175036	6.42e-06	2.1e-05	0.00449012	0.00616922	2.10183e-05	3.4104e-05
2.3	7	2	0.000965062	0.0195203	4.79e-06	2.47e-05	0.00483225	0.00712417	2.46865e-05	3.59737e-05
1.5	7	4	0.00107012	0.017407	7.21e-06	2.14e-05	0.00432557	0.00602589	2.13798e-05	3.42494e-05
1.7	7	4	0.00098865	0.0186841	6.38e-06	2.39e-05	0.00449909	0.0065916	2.39126e-05	3.55623e-05
2.1	7	4	0.000862556	0.0205476	4.67e-06	2.72e-05	0.00485838	0.00751813	2.72358e-05	3.71607e-05
2.3	7	4	0.000809848	0.0212906	3.77e-06	2.84e-05	0.00504645	0.00792944	2.83565e-05	3.76339e-05
2.5	7	4	0.000761765	0.0219566	2.84e-06	2.92e-05	0.00524023	0.00832119	2.92331e-05	3.79622e-05
2.7	7	4	0.000715936	0.0225982	1.88e-06	3e-05	0.00544191	0.00871346	2.99935e-05	3.82525e-05
2.9	7	4	0.000672404	0.0232158	8.84e-07	3.06e-05	0.00565058	0.00910514	3.06432e-05	3.84985e-05
1.5	7	6	0.000939379	0.0190732	6.65e-06	2.52e-05	0.00444323	0.00668864	2.51565e-05	3.60394e-05
1.7	7	6	0.000863362	0.0200994	5.77e-06	2.71e-05	0.00462688	0.00718636	2.70825e-05	3.69664e-05
1.9	7	6	0.000797406	0.0209415	4.86e-06	2.85e-05	0.00481731	0.00763171	2.8482e-05	3.75579e-05
2.1	7	6	0.000739128	0.0216559	3.92e-06	2.95e-05	0.0050139	0.00804125	2.94933e-05	3.79009e-05
2.3	7	6	0.000682198	0.0223646	2.93e-06	3.04e-05	0.0052226	0.00846267	3.0415e-05	3.82768e-05
2.5	7	6	0.000630573	0.0230026	1.9e-06	3.11e-05	0.00543702	0.0088658	3.11006e-05	3.8501e-05
2.7	7	6	0.000581795	0.023616	8.43e-07	3.17e-05	0.00565921	0.00926844	3.16665e-05	3.86818e-05
2.9	7	6	0.000540215	0.0241284	-2.14e-07	3.2e-05	0.00588059	0.00963304	3.1954e-05	3.86354e-05
1.3	7	8	0.000917827	0.0191151	7.07e-06	2.57e-05	0.00435392	0.00663812	2.56562e-05	3.62524e-05
1.5	7	8	0.000831706	0.0201802	6.19e-06	2.77e-05	0.00454014	0.00715041	2.77022e-05	3.7162e-05
1.7	7	8	0.000758247	0.0210188	5.26e-06	2.91e-05	0.0047341	0.00759719	2.90912e-05	3.76593e-05
1.9	7	8	0.00068771	0.0218193	4.27e-06	3.03e-05	0.00494237	0.00804779	3.02911e-05	3.81568e-05
2.1	7	8	0.000625716	0.0224968	3.24e-06	3.11e-05	0.00515679	0.00846307	3.11018e-05	3.84011e-05
2.3	7	8	0.00056983	0.023098	2.19e-06	3.17e-05	0.00537767	0.00885818	3.16535e-05	3.84917e-05
2.5	7	8	0.000515647	0.0237042	1.08e-06	3.22e-05	0.00560941	0.00926616	3.21502e-05	3.86054e-05
2.7	7	8	0.000464803	0.0242854	-6.19e-08	3.25e-05	0.00584874	0.00967239	3.25283e-05	3.8659e-05
2.9	7	8	0.00041732	0.0248432	-1.23e-06	3.28e-05	0.00609443	0.0100757	3.28019e-05	3.86524e-05
1.5	7	10	0.000739278	0.0209326	5.79e-06	2.94e-05	0.00462332	0.00748149	2.93917e-05	3.77333e-05
1.7	7	10	0.000661452	0.0217241	4.79e-06	3.06e-05	0.00483283	0.00792891	3.05722e-05	3.8138e-05
1.9	7	10	0.000591358	0.0224137	3.74e-06	3.14e-05	0.00505221	0.00835215	3.13977e-05	3.83596e-05
2.1	7	10	0.000526301	0.0230548	2.64e-06	3.2e-05	0.00528206	0.00876936	3.20166e-05	3.84977e-05
2.3	7	10	0.000463605	0.0236943	1.49e-06	3.26e-05	0.00552426	0.00919858	3.25516e-05	3.86382e-05
2.5	7	10	0.000407492	0.0242674	3.06e-07	3.29e-05	0.00577164	0.0096083	3.28645e-05	3.86211e-05
2.7	7	10	0.000355505	0.0248118	-9.07e-07	3.31e-05	0.0060258	0.0100131	3.30569e-05	3.85272e-05
2.9	7	10	0.000302909	0.0254088	-2.19e-06	3.33e-05	0.0062935	0.0104504	3.33144e-05	3.85399e-05
1.9	8	-2	0.00181696	0.00957753	1.04e-05	1.05e-05	0.00365502	0.00366012	7.28936e-06	3.24125e-05
2.3	8	-2	0.0016295	0.0119241	9.17e-06	1.12e-05	0.00391533	0.00409398	1.07802e-05	3.62999e-05
1.5	8	0	0.00161597	0.0118612	9.56e-06	1.1e-05	0.0038343	0.00395893	1.08226e-05	3.7736e-05
1.7	8	0	0.00145162	0.0135869	8.64e-06	1.37e-05	0.00402686	0.0045423	1.3722e-05	3.621e-05
2.3	8	0	0.00123103	0.0188208	6.54e-06	2.44e-05	0.00446521	0.0066158	2.44037e-05	3.74642e-05
1.5	8	2	0.00129193	0.0151656	8.16e-06	1.68e-05	0.00412593	0.00513079	1.68007e-05	3.22937e-05
1.7	8	2	0.00125434	0.0163381	7.68e-06	1.92e-05	0.00422809	0.00559373	1.91548e-05	3.28737e-05
1.9	8	2	0.00106854	0.0177303	6.34e-06	2.15e-05	0.00450822	0.00626118	2.15002e-05	3.43112e-05
2.3	8	2	0.00139338	0.0212069	7.61e-06	3.22e-05	0.00424117	0.00727157	3.21989e-05	3.93964e-05
2.5	8	2	0.000900574	0.020516	3.84e-06	2.64e-05	0.00503202	0.00763078	2.63923e-05	3.67913e-05
1.5	8	4	0.00105832	0.0175721	7.16e-06	2.17e-05	0.00433619	0.00609027	2.17476e-05	3.44349e-05
1.7	8	4	0.000980547	0.0187697	6.34e-06	2.41e-05	0.00450736	0.00662763	2.40985e-05	3.55769e-05
2.1	8	4	0.000853239	0.0206337	4.61e-06	2.74e-05	0.00487012	0.00755819	2.74115e-05	3.71995e-05
2.3	8	4	0.00079986	0.0213797	3.7e-06	2.85e-05	0.00506023	0.00797273	2.85306e-05	3.76805e-05
2.5	8	4	0.000751127	0.0220495	2.77e-06	2.94e-05	0.00525619	0.00836807	2.9406e-05	3.80147e-05
2.7	8	4	0.000704703	0.0226949	1.79e-06	3.02e-05	0.0054601	0.00876403	3.01645e-05	3.83106e-05
2.9	8	4	0.000664896	0.0232381	8.22e-07	3.06e-05	0.00566364	0.00912333	3.06402e-05	3.83853e-05
1.5	8	6	0.000931221	0.0191685	6.61e-06	2.54e-05	0.00445057	0.00672743	2.5377e-05	3.61538e-05
1.7	8	6	0.000854579	0.0201957	5.73e-06	2.73e-05	0.00463584	0.00722743	2.73015e-05	3.70896e-05
1.9	8	6	0.000787972	0.0210402	4.81e-06	2.87e-05	0.00482807	0.00767575	2.87003e-05	3.7687e-05
2.1	8	6	0.000729096	0.0217576	3.86e-06	2.97e-05	0.00502654	0.0080885	2.971e-05	3.80347e-05
2.3	8	6	0.000675795	0.0223958	2.89e-06	3.05e-05	0.00523144	0.00848109	3.0457e-05	3.82382e-05
2.5	8	6	0.000623723	0.0230363	1.85e-06	3.11e-05	0.0054473	0.00888639	3.11414e-05	3.84674e-05
2.7	8	6	0.000574514	0.0236523	7.87e-07	3.17e-05	0.00567101	0.00929134	3.1706e-05	3.8652e-05
2.9	8	6	0.000528109	0.0242463	-3.15e-07	3.22e-05	0.00590165	0.00969547	3.21642e-05	3.87846e-05
1.3	8	8	0.000909751	0.0192175	7.04e-06	2.59e-05	0.00436022	0.00667836	2.59039e-05	3.64268e-05
1.5	8	8	0.000826928	0.0202151	6.17e-06	2.78e-05	0.00454444	0.00716601	2.77779e-05	3.71629e-05
1.7	8	8	0.000748959	0.0211244	5.21e-06	2.93e-05	0.00474357	0.00764256	2.93379e-05	3.78444e-05
1.9	8	8	0.000681983	0.0218568	4.23e-06	3.04e-05	0.0049489	0.00806659	3.03629e-05	3.8168e-05
2.1	8	8	0.000619556	0.0225362	3.2e-06	3.12e-05	0.00516456	0.0084838	3.11721e-05	3.84169e-05
2.3	8	8	0.000563256	0.0231398	2.14e-06	3.17e-05	0.00538675	0.00888104	3.17228e-05	3.8511e-05
2.5	8	8	0.000508679	0.0237487	1.03e-06	3.22e-05	0.00561986	0.00929132	3.22187e-05	3.8628e-05
2.7	8	8	0.000457471	0.0243325	-1.19e-07	3.26e-05	0.00586062	0.00969989	3.25957e-05	3.86835e-05
2.9	8	8	0.000409656	0.0248931	-1.3e-06	3.29e-05	0.00610776	0.0101057	3.28684e-05	3.86785e-05
1.5	8	10	0.00073425	0.0209739	5.77e-06	2.95e-05	0.00462785	0.00749975	2.94855e-05	3.7777e-05
1.7	8	10	0.000655987	0.0217667	4.76e-06	3.07e-05	0.00483841	0.00794877	3.06641e-05	3.81859e-05
1.9	8	10	0.000585475	0.0224582	3.71e-06	3.15e-05	0.00505891	0.0083739	3.14884e-05	3.84114e-05
2.1	8	10	0.000520019	0.0231017	2.61e-06	3.21e-05	0.00528997	0.00879321	3.21064e-05	3.85524e-05
2.3	8	10	0.000461382	0.0236699	1.47e-06	3.25e-05	0.00552733	0.00919141	3.2469e-05	3.85185e-05
2.5	8	10	0.000405015	0.0242438	2.88e-07	3.28e-05	0.00577536	0.0096017	3.27819e-05	3.85039e-05
2.7	8	10	0.000348235	0.0248662	-9.63e-07	3.31e-05	0.00603758	0.0100437	3.31434e-05	3.85853e-05
2.9	8	10	0.000299986	0.0253866	-2.21e-06	3.32e-05	0.00629859	0.0104449	3.32313e-05	3.84256e-05
1.9	9	-2	0.00176394	0.0105914	1.01e-05	1.06e-05	0.00371546	0.00376087	8.81678e-06	4.06979e-05
2.3	9	-2	0.00145333	0.0134896	8.01e-06	1.32e-05	0.00415844	0.00458128	1.32171e-05	3.3199e-05
1.5	9	0	0.0015254	0.0127471	9.17e-06	1.23e-05	0.00391581	0.00420328	1.23186e-05	3.71813e-05
1.7	9	0	0.0013872	0.0142488	8.32e-06	1.49e-05	0.00409257	0.00480152	1.49178e-05	3.51537e-05
2.3	9	0	0.00123228	0.0194739	6.55e-06	2.61e-05	0.0044635	0.0068441	2.61343e-05	3.80493e-05
2.5	9	0	0.00105774	0.0183453	4.96e-06	2.19e-05	0.00479627	0.00667181	2.19339e-05	3.4556e-05
1.5	9	2	0.00120503	0.0155126	7.79e-06	1.73e-05	0.00420414	0.00529644	1.73399e-05	3.24156e-05
1.7	9	2	0.00111525	0.0169027	7e-06	2e-05	0.00436996	0.00588024	2.00058e-05	3.35723e-05
2.3	9	2	0.000927338	0.0199904	4.54e-06	2.57e-05	0.00488431	0.00733254	2.56689e-05	3.64018e-05
2.5	9	2	0.000878241	0.0207707	3.68e-06	2.69e-05	0.00506552	0.00774938	2.69053e-05	3.70074e-05
1.5	9	4	0.00104259	0.017781	7.09e-06	2.22e-05	0.00435034	0.00617237	2.22136e-05	3.46299e-05
1.7	9	4	0.000964482	0.0189694	6.26e-06	2.45e-05	0.00452374	0.00670979	2.45458e-05	3.57896e-05
2.1	9	4	0.000839078	0.0207639	4.53e-06	2.77e-05	0.00488796	0.00761893	2.76772e-05	3.72659e-05
2.3	9	4	0.000784687	0.0215144	3.6e-06	2.88e-05	0.00508117	0.00803834	2.87935e-05	3.77576e-05
2.5	9	4	0.000734989	0.0221899	2.65e-06	2.97e-05	0.0052804	0.00843915	2.96672e-05	3.81005e-05
2.7	9	4	0.000687675	0.0228411	1.66e-06	3.04e-05	0.00548769	0.0088407	3.04228e-05	3.84045e-05
2.9	9	4	0.00064704	0.023391	6.73e-07	3.09e-05	0.00569471	0.00920592	3.08964e-05	3.84872e-05
1.5	9	6	0.00166681	0.0175684	9.77e-06	2.39e-05	0.00378854	0.00569903	2.39396e-05	3.31518e-05
1.7	9	6	0.000845198	0.02027	5.68e-06	2.75e-05	0.00464541	0.00726112	2.74586e-05	3.70966e-05
1.9	9	6	0.000777718	0.0211173	4.76e-06	2.89e-05	0.00483976	0.00771263	2.88552e-05	3.77038e-05
2.1	9	6	0.000718041	0.0218379	3.8e-06	2.99e-05	0.00504047	0.0081288	2.98621e-05	3.80599e-05
2.3	9	6	0.00066399	0.0224798	2.81e-06	3.06e-05	0.00524773	0.00852507	3.06062e-05	3.82709e-05
2.5	9	6	0.000611204	0.0231246	1.77e-06	3.13e-05	0.00546607	0.00893444	3.12885e-05	3.8507e-05
2.7	9	6	0.000561305	0.0237455	6.84e-07	3.19e-05	0.00569241	0.00934374	3.18513e-05	3.86975e-05
2.9	9	6	0.000518684	0.024266	-3.93e-07	3.21e-05	0.00591805	0.00971526	3.21365e-05	3.86594e-05
1.3	9	8	0.000901377	0.0193028	7.01e-06	2.61e-05	0.00436676	0.00671283	2.6105e-05	3.65074e-05
1.5	9	8	0.000817739	0.0203015	6.13e-06	2.8e-05	0.00455271	0.0072029	2.79768e-05	3.72541e-05
1.7	9	8	0.000742997	0.0211434	5.19e-06	2.94e-05	0.00474966	0.00765408	2.93611e-05	3.77645e-05
1.9	9	8	0.000675385	0.0218775	4.2e-06	3.04e-05	0.00495642	0.00807998	3.03832e-05	3.80959e-05
2.1	9	8	0.00061235	0.0225593	3.16e-06	3.12e-05	0.00517364	0.00849938	3.11905e-05	3.83519e-05
2.3	9	8	0.000551149	0.0232392	2.06e-06	3.19e-05	0.00540345	0.00893179	3.19118e-05	3.86282e-05
2.5	9	8	0.00050034	0.0237775	9.71e-07	3.22e-05	0.00563237	0.00931192	3.22346e-05	3.85735e-05
2.7	9	8	0.000448622	0.0243646	-1.87e-07	3.26e-05	0.00587495	0.00972321	3.26106e-05	3.86325e-05
2.9	9	8	0.000400341	0.0249285	-1.38e-06	3.29e-05	0.00612397	0.0101318	3.28823e-05	3.86302e-05
1.5	9	10	0.000728661	0.0210015	5.74e-06	2.95e-05	0.00463288	0.00751351	2.95383e-05	3.77519e-05
1.7	9	10	0.000649793	0.0217959	4.73e-06	3.07e-05	0.00484473	0.0079643	3.07143e-05	3.81677e-05
1.9	9	10	0.000578702	0.0224896	3.67e-06	3.15e-05	0.00506663	0.00839154	3.1537e-05	3.83992e-05
2.1	9	10	0.000512694	0.0231357	2.56e-06	3.22e-05	0.0052992	0.0088132	3.21539e-05	3.85449e-05
2.3	9	10	0.00045356	0.0237069	1.42e-06	3.25e-05	0.00553813	0.00921387	3.25156e-05	3.85142e-05
2.5	9	10	0.000396728	0.0242837	2.29e-07	3.28e-05	0.00578779	0.00962672	3.28274e-05	3.8502e-05
2.7	9	10	0.000339535	0.024909	-1.03e-06	3.32e-05	0.00605168	0.0100713	3.31874e-05	3.85846e-05
2.9	9	10	0.000290918	0.0254324	-2.28e-06	3.33e-05	0.00631437	0.0104751	3.3274e-05	3.84257e-05
1.7	10	-2	0.00173023	0.0108603	9.99e-06	1.07e-05	0.00374268	0.00380622	9.22443e-06	3.97188e-05
2.3	10	-2	0.0013201	0.0156609	7.13e-06	1.73e-05	0.0043423	0.00543158	1.72561e-05	3.39175e-05
1.5	10	0	0.00143513	0.013634	8.78e-06	1.39e-05	0.00399705	0.00454143	1.38903e-05	3.53348e-05
1.7	10	0	0.00131941	0.0149225	7.99e-06	1.62e-05	0.00416171	0.00506988	1.6165e-05	3.36885e-05
1.5	10	2	0.00127075	0.0160109	8.07e-06	1.87e-05	0.00414499	0.00542896	1.86633e-05	3.28285e-05
1.7	10	2	0.00108338	0.0173665	6.84e-06	2.1e-05	0.00440246	0.0060632	2.10015e-05	3.40597e-05
2.3	10	2	0.00089728	0.0203557	4.34e-06	2.64e-05	0.00492579	0.00749617	2.64352e-05	3.6782e-05
2.5	10	2	0.0008465	0.0211427	3.45e-06	2.77e-05	0.00511313	0.00792248	2.76643e-05	3.74114e-05
2.7	10	2	0.000805463	0.0217535	2.57e-06	2.84e-05	0.00529687	0.00828501	2.84373e-05	3.76555e-05
2.9	10	2	0.000762302	0.0224158	1.63e-06	2.93e-05	0.00549416	0.0086807	2.92706e-05	3.80377e-05
1.5	10	4	0.00137946	0.0174425	8.54e-06	2.25e-05	0.00404716	0.00584568	2.25339e-05	3.381e-05
1.7	10	4	0.000944151	0.0192126	6.17e-06	2.51e-05	0.00454448	0.00681066	2.50909e-05	3.6042e-05
1.9	10	4	0.000876448	0.0201799	5.29e-06	2.68e-05	0.0047272	0.00728892	2.6846e-05	3.69153e-05
2.1	10	4	0.000815913	0.0210142	4.39e-06	2.82e-05	0.00491715	0.00773231	2.82131e-05	3.75586e-05
2.3	10	4	0.000764192	0.021698	3.47e-06	2.92e-05	0.00510945	0.00812785	2.91538e-05	3.78844e-05
2.5	10	4	0.00071324	0.0223812	2.5e-06	3e-05	0.00531302	0.00853597	3.0025e-05	3.82384e-05
2.7	10	4	0.000669016	0.0229634	1.52e-06	3.06e-05	0.00551792	0.00891016	3.06044e-05	3.83764e-05
2.9	10	4	0.000623038	0.0235992	4.74e-07	3.12e-05	0.00573648	0.00931827	3.12475e-05	3.86453e-05
1.5	10	6	0.000902311	0.0195024	6.49e-06	2.62e-05	0.00447659	0.00686376	2.61526e-05	3.65742e-05
1.7	10	6	0.000827305	0.0204643	5.6e-06	2.79e-05	0.00466366	0.0073444	2.79023e-05	3.73588e-05
1.9	10	6	0.00076257	0.0212455	4.67e-06	2.91e-05	0.00485703	0.00777247	2.91238e-05	3.77981e-05
2.1	10	6	0.000701807	0.0219709	3.7e-06	3.01e-05	0.00506092	0.00819372	3.0127e-05	3.81647e-05
2.3	10	6	0.000646732	0.0226183	2.69e-06	3.09e-05	0.00527155	0.00859546	3.08672e-05	3.83851e-05
2.5	10	6	0.000592972	0.0232697	1.63e-06	3.15e-05	0.00549342	0.00901087	3.1547e-05	3.86306e-05
2.7	10	6	0.000546513	0.0238207	5.7e-07	3.19e-05	0.00571637	0.00939097	3.19353e-05	3.86521e-05
2.9	10	6	0.000498641	0.0244259	-5.59e-07	3.24e-05	0.00595293	0.00980469	3.23901e-05	3.87956e-05
1.3	10	8	0.000888856	0.0194397	6.97e-06	2.64e-05	0.00437652	0.00676774	2.64324e-05	3.66825e-05
1.5	10	8	0.000804084	0.0204404	6.07e-06	2.83e-05	0.004565	0.00726151	2.83021e-05	3.74423e-05
1.7	10	8	0.000732292	0.0212161	5.13e-06	2.95e-05	0.00476058	0.0076887	2.95096e-05	3.77836e-05
1.9	10	8	0.000663767	0.0219533	4.14e-06	3.05e-05	0.00496966	0.00811808	3.0528e-05	3.81249e-05
2.1	10	8	0.000599856	0.0226392	3.09e-06	3.13e-05	0.00518938	0.00854145	3.13327e-05	3.83899e-05
2.3	10	8	0.000542143	0.0232503	2e-06	3.19e-05	0.00541588	0.00894539	3.18797e-05	3.84961e-05
2.5	10	8	0.000486221	0.0238676	8.7e-07	3.24e-05	0.00565355	0.00936297	3.23731e-05	3.86242e-05
2.7	10	8	0.000433783	0.0244601	-3.02e-07	3.27e-05	0.00589899	0.009779	3.27471e-05	3.86869e-05
2.9	10	8	0.000384848	0.0250295	-1.5e-06	3.3e-05	0.00615093	0.0101924	3.30165e-05	3.86868e-05
1.5	10	10	0.000718483	0.021084	5.7e-06	2.97e-05	0.00464204	0.00755012	2.97252e-05	3.78414e-05
1.7	10	10	0.00063873	0.0218812	4.68e-06	3.09e-05	0.00485601	0.00800424	3.08979e-05	3.8266e-05
1.9	10	10	0.00056679	0.0225788	3.61e-06	3.17e-05	0.00508021	0.00843532	3.17181e-05	3.85046e-05
2.1	10	10	0.000504329	0.0231578	2.51e-06	3.22e-05	0.00530974	0.00882966	3.21615e-05	3.84792e-05
2.3	10	10	0.000440125	0.0238057	1.33e-06	3.27e-05	0.00555667	0.00926627	3.26928e-05	3.86284e-05
2.5	10	10	0.000382627	0.0243877	1.28e-07	3.3e-05	0.00580894	0.0096837	3.30026e-05	3.86185e-05
2.7	10	10	0.000329427	0.0249408	-1.11e-06	3.32e-05	0.00606805	0.0100961	3.31909e-05	3.85282e-05
2.9	10	10	0.000280341	0.0254675	-2.37e-06	3.33e-05	0.00633277	0.0105028	3.32761e-05	3.8371e-05

## Sheet: (36,25.4)
																					whole potentials of the equilibrium droplet		the unit length energy barrier
0	0	0	0.00182368	0	1.04e-05	1.04e-05	0.00364736	0.00364736	0	4.17933e-05		(0,0,0)	-1.471	-240.4	-6.975	-21.56	-353.8	-181.2	-10.78		2.483e-06		2.9e-06
0.2	0	0	0.00175307	0.0081554	1.04e-05	1.05e-05	0.00365583	0.00803254	5.28455e-06	4.09269e-05		(1,0,0)	-0.4126	810.1	38.53	87.01	1106	729.8	287.9
0.4	0	0	0.00169362	0.0105505	1.03e-05	1.05e-05	0.00367857	0.0160647	8.80763e-06	4.02348e-05		(0,1,0)	0.1146	-0.4402	-0.1836	-0.03621	-0.3459	0.309	-0.3987
0.8	0	0	0.00157427	0.0123748	9.88e-06	1.19e-05	0.00376708	0.0240882	1.19239e-05	3.93309e-05		(0,0,1)	0.217	6.69	-0.2337	0.205	8.992	4.064	-0.2814
1.2	0	0	0.00145493	0.0143567	9.18e-06	1.56e-05	0.00391286	0.0321097	1.56341e-05	3.82374e-05		(2,0,0)	3.594	-877.8	-41.22	-96.91	-1158	-897.5	-466.3
1.6	0	0	0.00133558	0.0159108	8.21e-06	1.85e-05	0.00411593	0.0401533	1.85247e-05	3.72154e-05		(1,1,0)	-0.2275	-0.333	0.4109	0.1296	-1.35	-0.897	0.5353
1.9	0	0	0.00117641	0.0165158	6.93e-06	1.91e-05	0.00438524	0.0456807	1.90506e-05	3.34322e-05		(1,0,1)	-0.3604	-12.99	0.3946	-0.3931	-17.92	-9.411	-1.33
2	0	0	0.0011451	0.016845	6.56e-06	1.96e-05	0.00446166	0.0463347	1.95607e-05	3.30486e-05		(0,2,0)	0.001536	0.009338	-0.003745	-0.002856	0.02005	0.00322	0.002445
2.1	0	0	0.00111673	0.0171448	6.2e-06	2e-05	0.00453812	0.046886	2.00022e-05	3.27163e-05		(0,1,1)	-0.001711	0.007482	0.002214	-0.000384	0.006462	-0.004468	0.01324
2.2	0	0	0.00108957	0.0174183	5.82e-06	2.04e-05	0.00461638	0.0473641	2.03751e-05	3.23845e-05		(0,0,2)	-0.003793	-0.07066	0.005571	-0.0001625	-0.08579	-0.03319	0.01246
2.3	0	0	0.00106542	0.017826	5.45e-06	2.11e-05	0.00469376	0.0477815	2.10653e-05	3.26805e-05		(3,0,0)	-0.5058	405.7	22.19	50.24	532.7	463.7	290.6
2.4	0	0	0.00104091	0.0182339	5.07e-06	2.17e-05	0.00477455	0.0481389	2.17464e-05	3.29952e-05		(2,1,0)	0.1868	0.8226	-0.3587	-0.1318	1.296	0.5087	-0.4244
2.5	0	0	0.00101657	0.0186466	4.67e-06	2.24e-05	0.00485803	0.0484455	2.24306e-05	3.33539e-05		(2,0,1)	0.1941	8.28	-0.2349	0.2024	11.47	6.878	2.16
2.6	0	0	0.000994338	0.0190227	4.27e-06	2.3e-05	0.00494113	0.0487385	2.30286e-05	3.36533e-05		(1,2,0)	9.142e-05	-0.008544	-0.0002806	-0.0003491	-0.004834	0.004991	0.00468
1.9	0	-4	0.00176344	0.0106096	1.01e-05	1.06e-05	0.00371603	0.0183345	8.84614e-06	4.07776e-05		(1,1,1)	0.001194	0.00173	-0.0009947	0.001491	0.008077	0.005101	-0.01549
2.3	0	-4	0.00145303	0.013509	8.01e-06	1.33e-05	0.00415885	0.0230245	1.32543e-05	3.32663e-05		(1,0,2)	0.005517	0.0775	-0.01007	-0.003566	0.1027	0.04504	-0.007724
1.5	0	-2	0.00165581	0.0114825	9.73e-06	1.09e-05	0.00379844	0.0198884	1.02082e-05	3.82432e-05		(0,3,0)	-3.707e-05	5.665e-06	8.778e-05	6.531e-05	-0.000147	-8.741e-05	-6.739e-05
1.7	0	-2	0.00148156	0.0132984	8.78e-06	1.32e-05	0.00399632	0.0223965	1.32166e-05	3.67253e-05		(0,2,1)	1.323e-05	-0.0001717	-3.092e-05	-2.32e-05	-0.0001959	3.541e-05	1.844e-05
2.3	0	-2	0.0012356	0.0184753	6.57e-06	2.35e-05	0.00445891	0.0265152	2.35413e-05	3.71216e-05		(0,1,2)	-3.745e-06	1.786e-05	2.233e-05	3.26e-05	2.258e-08	8.387e-07	-0.0001472
1.5	0	0	0.00133705	0.0146526	8.36e-06	1.58e-05	0.00408533	0.0244447	1.57954e-05	3.35651e-05		(0,0,3)	2.28e-05	0.0003877	-3.319e-05	1.57e-06	0.0003956	0.0001542	-7.373e-05
1.5	0	2	0.00111765	0.0167468	7.41e-06	1.99e-05	0.00428279	0.025565	1.99354e-05	3.36046e-05		(4,0,0)	0.4764	-69.45	-5.413	-10.59	-94.01	-88.22	-62.27
1.7	0	2	0.00103589	0.0180526	6.61e-06	2.25e-05	0.0044509	0.0263085	2.25069e-05	3.48651e-05		(3,1,0)	-0.06775	-0.1437	0.1474	0.08775	-0.1224	-0.02725	0.1053
1.9	0	2	0.000968821	0.019113	5.8e-06	2.45e-05	0.0046219	0.0267922	2.45098e-05	3.5836e-05		(3,0,1)	-0.02714	-1.8	0.02674	-0.05112	-2.423	-1.617	-0.7673
2.3	0	2	0.000852599	0.0208747	4.05e-06	2.75e-05	0.00498745	0.0274614	2.75219e-05	3.73422e-05		(2,2,0)	0.000318	-0.001223	-0.0008191	-0.0008568	-0.005985	-0.003737	-0.001486
2.5	0	2	0.000807237	0.021528	3.17e-06	2.84e-05	0.00517203	0.0277555	2.84113e-05	3.76554e-05		(2,1,1)	-0.0003604	-0.004356	0.0002145	-0.0006124	-0.003673	-2.14e-05	0.005266
2.7	0	2	0.000759761	0.0222297	2.22e-06	2.93e-05	0.00537091	0.027938	2.93496e-05	3.80986e-05		(2,0,2)	-0.00189	-0.01815	0.004127	0.002563	-0.02896	-0.01375	-0.0001888
2.9	0	2	0.000718511	0.0228296	1.27e-06	3e-05	0.00557035	0.0281484	3.00027e-05	3.83192e-05		(1,3,0)	-1.542e-06	2.307e-05	3.539e-06	4.995e-06	8.311e-05	2.788e-05	-2.17e-06
1.5	0	4	0.000987476	0.01852	6.86e-06	2.39e-05	0.00439994	0.0266217	2.38943e-05	3.55199e-05		(1,2,1)	-5.366e-06	0.0001022	1.542e-05	1.398e-05	2.019e-05	-5.655e-05	-3.58e-05
1.7	0	4	0.000911018	0.0196152	6e-06	2.6e-05	0.00457827	0.0270876	2.6005e-05	3.65509e-05		(1,1,2)	4.81e-06	-3.901e-05	-1.904e-05	-2.382e-05	-1.672e-05	9.553e-06	9.236e-05
1.9	0	4	0.000844964	0.020521	5.12e-06	2.76e-05	0.0047631	0.027465	2.75962e-05	3.72929e-05		(1,0,3)	-1.705e-05	-0.0001988	3.149e-05	1.243e-05	-0.00022	-8.748e-05	4.034e-05
2.1	0	4	0.00078619	0.0212866	4.21e-06	2.88e-05	0.0049546	0.0278399	2.87727e-05	3.77579e-05		(0,4,0)	1.969e-07	-1.6e-07	-4.649e-07	-3.549e-07	1.601e-07	2.329e-07	2.767e-07
2.3	0	4	0.000732493	0.0219817	3.26e-06	2.97e-05	0.0051532	0.0280793	2.97112e-05	3.81078e-05		(0,3,1)	-5.383e-09	2.034e-07	1.803e-08	2.394e-08	7.71e-07	2.643e-07	1.292e-07
2.5	0	4	0.000683876	0.0226049	2.29e-06	3.04e-05	0.00535707	0.0283118	3.04153e-05	3.83142e-05		(0,2,2)	-3.674e-08	4.246e-07	7.373e-08	4.44e-08	3.668e-07	-2.451e-07	-9.321e-08
2.7	0	4	0.000637991	0.0231976	1.28e-06	3.1e-05	0.00556818	0.0285403	3.09883e-05	3.84669e-05		(0,1,3)	4.431e-08	-2.162e-07	-1.302e-07	-1.339e-07	-1.668e-07	7.77e-08	4.725e-07
2.9	0	4	0.000590392	0.0238368	2.03e-07	3.16e-05	0.00579328	0.0287213	3.16038e-05	3.87213e-05		(0,0,4)	-5.557e-08	-8.49e-07	7.932e-08	-7.376e-09	-7.013e-07	-3.592e-07	8.571e-08
1.5	0	6	0.000880703	0.0197247	6.4e-06	2.67e-05	0.00449604	0.0272599	2.6664e-05	3.67868e-05
1.7	0	6	0.000807711	0.0206254	5.5e-06	2.82e-05	0.00468365	0.0276817	2.82487e-05	3.74292e-05
1.9	0	6	0.000741244	0.0214089	4.56e-06	2.95e-05	0.00488134	0.0280278	2.94555e-05	3.78745e-05
2.1	0	6	0.000678872	0.0221422	3.56e-06	3.05e-05	0.00508982	0.0283096	3.04559e-05	3.82613e-05
2.3	0	6	0.000622266	0.0227945	2.53e-06	3.12e-05	0.00530531	0.0285682	3.11822e-05	3.84856e-05
2.5	0	6	0.000571369	0.02338	1.48e-06	3.17e-05	0.00552583	0.028835	3.16859e-05	3.85681e-05
2.7	0	6	0.000519203	0.0240092	3.59e-07	3.22e-05	0.00576061	0.0290328	3.22232e-05	3.87527e-05
2.9	0	6	0.000474497	0.0245511	-7.6e-07	3.25e-05	0.00599494	0.0292735	3.25164e-05	3.87447e-05
1.3	0	8	0.000871575	0.0196145	6.9e-06	2.68e-05	0.00439	0.0272505	2.68477e-05	3.68673e-05
1.5	0	8	0.000789045	0.0205564	6e-06	2.86e-05	0.00457853	0.0278091	2.8559e-05	3.74921e-05
1.7	0	8	0.000711708	0.0213983	5.03e-06	2.99e-05	0.00478157	0.0281854	2.99145e-05	3.8004e-05
1.9	0	8	0.000641668	0.0221396	4.01e-06	3.09e-05	0.00499485	0.028491	3.09212e-05	3.8352e-05
2.1	0	8	0.000580559	0.0227621	2.97e-06	3.16e-05	0.00521369	0.0287921	3.15507e-05	3.84545e-05
2.3	0	8	0.000521562	0.0233814	1.87e-06	3.21e-05	0.00544428	0.0290505	3.20968e-05	3.85729e-05
2.5	0	8	0.000464425	0.0240038	7.14e-07	3.26e-05	0.00568624	0.0292899	3.25788e-05	3.86992e-05
2.7	0	8	0.000415402	0.0245291	-4.44e-07	3.28e-05	0.00592877	0.0295707	3.27838e-05	3.85972e-05
2.9	0	8	0.000365534	0.0251026	-1.67e-06	3.3e-05	0.00618453	0.0297979	3.30443e-05	3.8594e-05
1.5	0	10	0.000702824	0.0212126	5.63e-06	3e-05	0.00465613	0.0281656	3.0018e-05	3.79911e-05
1.7	0	10	0.000625846	0.0219439	4.62e-06	3.1e-05	0.00486915	0.0286092	3.10079e-05	3.82446e-05
1.9	0	10	0.000552702	0.0226468	3.53e-06	3.18e-05	0.00509627	0.0289019	3.18268e-05	3.84966e-05
2.1	0	10	0.000484755	0.0232986	2.39e-06	3.24e-05	0.00533441	0.0291791	3.24268e-05	3.86412e-05
2.3	0	10	0.000423897	0.0238807	1.23e-06	3.28e-05	0.00557906	0.0294769	3.27847e-05	3.862e-05
2.5	0	10	0.00036546	0.0244667	5.18e-09	3.31e-05	0.00583469	0.0297503	3.30864e-05	3.86076e-05
2.7	0	10	0.000311441	0.0250249	-1.25e-06	3.33e-05	0.00609719	0.0300237	3.32698e-05	3.85173e-05
2.9	0	10	0.000261613	0.0255569	-2.53e-06	3.34e-05	0.00636536	0.0303921	3.33504e-05	3.83596e-05
2.3	1	-4	0.00179602	0.0103845	1.03e-05	1.06e-05	0.00368552	0.0235908	8.52187e-06	3.96325e-05
1.7	1	-2	0.00167833	0.0113949	9.74e-06	1.09e-05	0.00379562	0.0197157	1.00583e-05	3.92606e-05
2.3	1	-2	0.00129459	0.0163227	6.96e-06	1.86e-05	0.0043775	0.02522	1.86322e-05	3.4753e-05
1.5	1	0	0.00141336	0.0138588	8.69e-06	1.43e-05	0.00401665	0.0233039	1.43024e-05	3.50287e-05
1.7	1	0	0.00130563	0.015081	7.93e-06	1.65e-05	0.00417577	0.024945	1.64698e-05	3.34005e-05
2.3	1	0	0.00104967	0.01833	5.35e-06	2.22e-05	0.00471549	0.026318	2.21928e-05	3.47233e-05
2.5	1	0	0.000997135	0.0192596	4.53e-06	2.38e-05	0.00488718	0.0266836	2.38152e-05	3.55705e-05
1.5	1	2	0.00126909	0.0161926	8.07e-06	1.91e-05	0.00414649	0.0261623	1.90844e-05	3.31132e-05
1.7	1	2	0.0010714	0.01756	6.78e-06	2.14e-05	0.00441469	0.025994	2.14275e-05	3.43755e-05
2.3	1	2	0.000888472	0.0204745	4.29e-06	2.67e-05	0.00493795	0.0273158	2.66915e-05	3.69512e-05
2.5	1	2	0.00084122	0.021186	3.41e-06	2.77e-05	0.00512105	0.0275534	2.77423e-05	3.73991e-05
2.7	1	2	0.000795714	0.0218731	2.5e-06	2.87e-05	0.00531267	0.0277811	2.86787e-05	3.78159e-05
2.9	1	2	0.000756286	0.0224637	1.58e-06	2.93e-05	0.00550463	0.0280066	2.93478e-05	3.8035e-05
1.5	1	4	0.00138868	0.0174695	8.58e-06	2.26e-05	0.00403886	0.0276207	2.26369e-05	3.3822e-05
1.7	1	4	0.000935989	0.0193316	6.13e-06	2.54e-05	0.00455281	0.0269432	2.5367e-05	3.62563e-05
1.9	1	4	0.000871764	0.0202317	5.27e-06	2.7e-05	0.00473254	0.0273481	2.696e-05	3.69673e-05
2.1	1	4	0.000810855	0.0210623	4.36e-06	2.83e-05	0.00492352	0.0276762	2.83128e-05	3.75958e-05
2.3	1	4	0.000758792	0.0217535	3.43e-06	2.93e-05	0.0051169	0.0279458	2.92678e-05	3.79447e-05
2.5	1	4	0.000707514	0.0224342	2.45e-06	3.01e-05	0.00532161	0.0281759	3.01263e-05	3.82859e-05
2.7	1	4	0.00066299	0.0230215	1.47e-06	3.07e-05	0.00552768	0.0284117	3.07127e-05	3.84364e-05
2.9	1	4	0.00061672	0.023654	4.22e-07	3.13e-05	0.00574747	0.0286007	3.134e-05	3.86889e-05
1.5	1	6	0.000897969	0.0195575	6.47e-06	2.63e-05	0.0044805	0.0271425	2.62833e-05	3.666e-05
1.7	1	6	0.000826555	0.0204521	5.59e-06	2.79e-05	0.00466443	0.0275855	2.78655e-05	3.72748e-05
1.9	1	6	0.00075755	0.021301	4.65e-06	2.92e-05	0.00486275	0.0279125	2.92486e-05	3.78828e-05
2.1	1	6	0.000700617	0.0219568	3.69e-06	3.01e-05	0.00506242	0.0282399	3.00809e-05	3.80779e-05
2.3	1	6	0.000641115	0.0226739	2.66e-06	3.1e-05	0.0052793	0.0284705	3.0981e-05	3.84629e-05
2.5	1	6	0.000591384	0.0232549	1.62e-06	3.15e-05	0.0054958	0.0287415	3.14951e-05	3.85432e-05
2.7	1	6	0.000540355	0.0238789	5.22e-07	3.2e-05	0.00572635	0.028943	3.20423e-05	3.87274e-05
2.9	1	6	0.000496692	0.0244117	-5.76e-07	3.23e-05	0.00595632	0.0291847	3.23359e-05	3.87098e-05
1.3	1	8	0.000888413	0.0194345	6.97e-06	2.64e-05	0.00437687	0.0271877	2.64167e-05	3.66304e-05
1.5	1	8	0.000803431	0.0204351	6.06e-06	2.83e-05	0.00456558	0.027725	2.82848e-05	3.73932e-05
1.7	1	8	0.0007274	0.0212768	5.11e-06	2.97e-05	0.00476557	0.0281143	2.96543e-05	3.79028e-05
1.9	1	8	0.000658585	0.0220161	4.11e-06	3.07e-05	0.00497557	0.0284327	3.06734e-05	3.8248e-05
2.1	1	8	0.000594395	0.0226954	3.05e-06	3.15e-05	0.00519626	0.0287018	3.14539e-05	3.84862e-05
2.3	1	8	0.000536417	0.0233119	1.97e-06	3.2e-05	0.00542378	0.0289663	3.2009e-05	3.86043e-05
2.5	1	8	0.000480246	0.0239288	8.27e-07	3.25e-05	0.00566251	0.0292077	3.24943e-05	3.87249e-05
2.7	1	8	0.000432081	0.0244494	-3.15e-07	3.27e-05	0.00590175	0.0295133	3.27048e-05	3.86223e-05
2.9	1	8	0.000383006	0.0250169	-1.52e-06	3.3e-05	0.00615413	0.0297175	3.29674e-05	3.86156e-05
1.5	1	10	0.000713754	0.0211455	5.68e-06	2.99e-05	0.00464629	0.0281027	2.98774e-05	3.79758e-05
1.7	1	10	0.000637849	0.021876	4.67e-06	3.09e-05	0.00485691	0.0285576	3.08786e-05	3.82266e-05
1.9	1	10	0.000565744	0.0225694	3.6e-06	3.17e-05	0.00508141	0.0288543	3.16854e-05	3.84511e-05
2.1	1	10	0.000498776	0.0232202	2.48e-06	3.23e-05	0.00531674	0.0291311	3.22992e-05	3.86028e-05
2.3	1	10	0.000438784	0.0237964	1.32e-06	3.27e-05	0.00555852	0.0294287	3.26577e-05	3.85753e-05
2.5	1	10	0.000381152	0.0243774	1.18e-07	3.3e-05	0.00581115	0.0297024	3.29635e-05	3.85619e-05
2.7	1	10	0.000327833	0.0249299	-1.12e-06	3.31e-05	0.00607063	0.0300593	3.31489e-05	3.84692e-05
2.9	1	10	0.000278638	0.0254564	-2.39e-06	3.32e-05	0.00633573	0.0302504	3.32326e-05	3.83111e-05
1.9	2	-2	0.00163177	0.0137739	9.4e-06	1.45e-05	0.00386614	0.0319461	1.45113e-05	3.87844e-05
2.3	2	-2	0.00141836	0.0138407	7.78e-06	1.38e-05	0.0042067	0.0234871	1.37976e-05	3.25871e-05
1.5	2	0	0.00149773	0.012996	9.05e-06	1.27e-05	0.00394071	0.0213375	1.27476e-05	3.68371e-05
1.7	2	0	0.00136812	0.0144341	8.23e-06	1.53e-05	0.00411203	0.0239888	1.52561e-05	3.48099e-05
2.3	2	0	0.00123438	0.0196765	6.57e-06	2.67e-05	0.0044606	0.0272693	2.66942e-05	3.83038e-05
1.5	2	2	0.00119622	0.0155887	7.75e-06	1.75e-05	0.00421208	0.0247878	1.74864e-05	3.2335e-05
1.7	2	2	0.0011071	0.0170357	6.96e-06	2.03e-05	0.00437828	0.0257358	2.0293e-05	3.37669e-05
2.3	2	2	0.000918854	0.0201183	4.49e-06	2.59e-05	0.00489602	0.0271095	2.59484e-05	3.66103e-05
2.5	2	2	0.000869372	0.0208993	3.61e-06	2.72e-05	0.00507882	0.027384	2.71809e-05	3.7217e-05
2.7	2	2	0.000825529	0.021574	2.73e-06	2.81e-05	0.00526437	0.0276298	2.81149e-05	3.76065e-05
2.9	2	2	0.00078353	0.0222316	1.81e-06	2.9e-05	0.00545722	0.0278389	2.89586e-05	3.79865e-05
1.5	2	4	0.00103466	0.0179144	7.06e-06	2.25e-05	0.00435748	0.0262644	2.25205e-05	3.48894e-05
1.7	2	4	0.000956457	0.0190941	6.23e-06	2.48e-05	0.00453193	0.0268064	2.48351e-05	3.60305e-05
2.1	2	4	0.000834294	0.0208262	4.5e-06	2.78e-05	0.00489399	0.0275683	2.78159e-05	3.73625e-05
2.3	2	4	0.000779605	0.021576	3.57e-06	2.89e-05	0.00508818	0.0278366	2.89258e-05	3.78482e-05
2.5	2	4	0.000729625	0.0222521	2.61e-06	2.98e-05	0.00528844	0.0280773	2.97955e-05	3.81882e-05
2.7	2	4	0.000686288	0.0228264	1.65e-06	3.04e-05	0.00548993	0.0283218	3.0373e-05	3.83112e-05
2.9	2	4	0.000641172	0.0234527	6.25e-07	3.1e-05	0.00570492	0.0285255	3.10107e-05	3.85625e-05
1.5	2	6	0.00168173	0.0175934	9.84e-06	2.41e-05	0.00377511	0.0283812	2.40663e-05	3.32396e-05
1.7	2	6	0.00084069	0.0203293	5.66e-06	2.76e-05	0.00465001	0.0274899	2.75984e-05	3.72045e-05
1.9	2	6	0.000772921	0.0211774	4.73e-06	2.9e-05	0.00484522	0.0278299	2.89937e-05	3.78117e-05
2.1	2	6	0.000712981	0.0218992	3.77e-06	3e-05	0.00504684	0.0281313	2.9999e-05	3.81681e-05
2.3	2	6	0.000658682	0.0225451	2.77e-06	3.07e-05	0.00525506	0.0284636	3.07484e-05	3.83883e-05
2.5	2	6	0.000605663	0.0231853	1.73e-06	3.14e-05	0.00547439	0.0286602	3.1412e-05	3.86036e-05
2.7	2	6	0.000559904	0.0237329	6.74e-07	3.18e-05	0.00569468	0.0288853	3.18062e-05	3.86242e-05
2.9	2	6	0.000512704	0.0243349	-4.43e-07	3.23e-05	0.00592846	0.0290883	3.22683e-05	3.87698e-05
1.3	2	8	0.000901017	0.019299	7.01e-06	2.61e-05	0.00436704	0.0271231	2.60934e-05	3.64665e-05
1.5	2	8	0.000813296	0.0203655	6.11e-06	2.81e-05	0.00455671	0.027641	2.81344e-05	3.73928e-05
1.7	2	8	0.000738287	0.0212075	5.16e-06	2.95e-05	0.00475446	0.0280359	2.95158e-05	3.79007e-05
1.9	2	8	0.000670427	0.0219385	4.17e-06	3.05e-05	0.00496207	0.0283646	3.05246e-05	3.82175e-05
2.1	2	8	0.000607154	0.0226233	3.13e-06	3.13e-05	0.00518018	0.02864	3.13348e-05	3.84795e-05
2.3	2	8	0.000550047	0.0232291	2.06e-06	3.19e-05	0.00540497	0.028909	3.18763e-05	3.85714e-05
2.5	2	8	0.000494702	0.0238439	9.31e-07	3.24e-05	0.00564083	0.0291524	3.23724e-05	3.86966e-05
2.7	2	8	0.000442792	0.024431	-2.32e-07	3.27e-05	0.0058844	0.0294449	3.27416e-05	3.87487e-05
2.9	2	8	0.000398886	0.0249212	-1.39e-06	3.29e-05	0.0061265	0.0296643	3.28506e-05	3.85816e-05
1.5	2	10	0.000724079	0.0210676	5.72e-06	2.97e-05	0.004637	0.0280621	2.9704e-05	3.79069e-05
1.7	2	10	0.000649089	0.0217971	4.73e-06	3.07e-05	0.00484544	0.0285253	3.07142e-05	3.81549e-05
1.9	2	10	0.000577871	0.0224883	3.67e-06	3.15e-05	0.00506758	0.028828	3.15285e-05	3.83776e-05
2.1	2	10	0.000511743	0.0231315	2.56e-06	3.21e-05	0.0053004	0.0291053	3.21361e-05	3.85134e-05
2.3	2	10	0.000448066	0.0237729	1.38e-06	3.27e-05	0.00554571	0.0293617	3.26584e-05	3.86472e-05
2.5	2	10	0.000391051	0.0243502	1.88e-07	3.3e-05	0.0057963	0.0296355	3.29647e-05	3.86295e-05
2.7	2	10	0.000338273	0.0249005	-1.04e-06	3.32e-05	0.00605372	0.0299783	3.31548e-05	3.85384e-05
2.9	2	10	0.000289572	0.0254242	-2.3e-06	3.32e-05	0.00631671	0.0301834	3.32412e-05	3.83801e-05
1.9	3	-2	0.00179645	0.0100889	1.03e-05	1.05e-05	0.0036784	0.0295638	8.05418e-06	3.316e-05
2.3	3	-2	0.00158139	0.0123133	8.85e-06	1.14e-05	0.00398172	0.0213237	1.13605e-05	3.54552e-05
1.5	3	0	0.00159287	0.012081	9.46e-06	1.12e-05	0.00385509	0.0207633	1.11857e-05	3.7499e-05
1.7	3	0	0.00143433	0.0137582	8.55e-06	1.4e-05	0.00404449	0.0230405	1.40265e-05	3.59684e-05
2.3	3	0	0.00123046	0.0189733	6.54e-06	2.48e-05	0.00446601	0.02682	2.47975e-05	3.76364e-05
1.5	3	2	0.00128712	0.0152258	8.14e-06	1.69e-05	0.00413027	0.0253557	1.69215e-05	3.21633e-05
1.7	3	2	0.00125499	0.0163971	7.68e-06	1.93e-05	0.00422743	0.0264689	1.92956e-05	3.29373e-05
1.9	3	2	0.0010605	0.0178714	6.29e-06	2.18e-05	0.00451738	0.0261341	2.18098e-05	3.45659e-05
2.1	3	2	0.000997346	0.0189253	5.48e-06	2.38e-05	0.00468854	0.0266039	2.37643e-05	3.55522e-05
2.3	3	2	0.000944161	0.0198019	4.65e-06	2.53e-05	0.0048611	0.0269717	2.52834e-05	3.62868e-05
2.5	3	2	0.000895985	0.0205763	3.8e-06	2.65e-05	0.0050389	0.0272689	2.65181e-05	3.68624e-05
1.5	3	4	0.00105424	0.0176421	7.14e-06	2.19e-05	0.00433985	0.0261211	2.19074e-05	3.45588e-05
1.7	3	4	0.000976431	0.018834	6.32e-06	2.42e-05	0.00451155	0.0267118	2.42464e-05	3.56887e-05
2.1	3	4	0.000848693	0.0206984	4.58e-06	2.76e-05	0.00487584	0.0274618	2.75576e-05	3.73153e-05
2.3	3	4	0.000795073	0.0214391	3.67e-06	2.87e-05	0.00506684	0.0277411	2.86587e-05	3.7774e-05
2.5	3	4	0.000746109	0.0221118	2.73e-06	2.95e-05	0.00526372	0.0279902	2.95371e-05	3.81136e-05
2.7	3	4	0.000703692	0.02269	1.79e-06	3.01e-05	0.00546174	0.0282431	3.01438e-05	3.8261e-05
2.9	3	4	0.000659469	0.0233118	7.77e-07	3.08e-05	0.00567309	0.0284594	3.07899e-05	3.85113e-05
1.5	3	6	0.000927097	0.0192343	6.6e-06	2.55e-05	0.00445428	0.0269834	2.55352e-05	3.62937e-05
1.7	3	6	0.000854133	0.0201968	5.73e-06	2.73e-05	0.0046363	0.0274326	2.73023e-05	3.7069e-05
1.9	3	6	0.000787396	0.0210367	4.81e-06	2.87e-05	0.00482872	0.0277846	2.86875e-05	3.76507e-05
2.1	3	6	0.000728399	0.021756	3.86e-06	2.97e-05	0.00502741	0.028095	2.97014e-05	3.8006e-05
2.3	3	6	0.000670789	0.0224607	2.85e-06	3.06e-05	0.00523835	0.0283638	3.06e-05	3.83618e-05
2.5	3	6	0.000618528	0.0231059	1.82e-06	3.13e-05	0.00545509	0.0286253	3.12916e-05	3.86014e-05
2.7	3	6	0.000573489	0.0236502	7.79e-07	3.17e-05	0.00567267	0.0288257	3.16923e-05	3.86214e-05
2.9	3	6	0.000526982	0.0242404	-3.24e-07	3.21e-05	0.00590362	0.0290294	3.21389e-05	3.8741e-05
1.3	3	8	0.000909463	0.0192211	7.04e-06	2.59e-05	0.00436045	0.0270618	2.59126e-05	3.64207e-05
1.5	3	8	0.000822616	0.0202823	6.15e-06	2.79e-05	0.00454832	0.0275868	2.79447e-05	3.73196e-05
1.7	3	8	0.000748446	0.0211244	5.21e-06	2.93e-05	0.0047441	0.0279888	2.93352e-05	3.7827e-05
1.9	3	8	0.000681367	0.0218541	4.23e-06	3.04e-05	0.0049496	0.0283257	3.0352e-05	3.81419e-05
2.1	3	8	0.000618841	0.0225367	3.2e-06	3.12e-05	0.00516546	0.028608	3.11689e-05	3.84018e-05
2.3	3	8	0.000558134	0.0232093	2.11e-06	3.19e-05	0.00539381	0.0288422	3.1878e-05	3.8657e-05
2.5	3	8	0.000507778	0.0237477	1.02e-06	3.22e-05	0.00562121	0.0291268	3.22094e-05	3.86074e-05
2.7	3	8	0.000456485	0.0243285	-1.26e-07	3.26e-05	0.00586222	0.0293642	3.2577e-05	3.86525e-05
2.9	3	8	0.000408593	0.0248879	-1.31e-06	3.28e-05	0.00610961	0.0295998	3.28454e-05	3.86431e-05
1.5	3	10	0.000733813	0.0209781	5.77e-06	2.95e-05	0.00462824	0.0280457	2.94955e-05	3.77792e-05
1.7	3	10	0.000655458	0.0217642	4.76e-06	3.07e-05	0.00483895	0.0284792	3.06543e-05	3.81644e-05
1.9	3	10	0.000584858	0.0224544	3.71e-06	3.15e-05	0.00505962	0.0287812	3.14742e-05	3.83858e-05
2.1	3	10	0.000519317	0.0230962	2.6e-06	3.21e-05	0.00529086	0.0290629	3.20866e-05	3.85212e-05
2.3	3	10	0.000456178	0.0237381	1.44e-06	3.26e-05	0.00553451	0.029319	3.26196e-05	3.86631e-05
2.5	3	10	0.000399658	0.0243134	2.5e-07	3.29e-05	0.00578339	0.0295931	3.29299e-05	3.86462e-05
2.7	3	10	0.000347314	0.0248607	-9.71e-07	3.31e-05	0.00603907	0.0299232	3.31215e-05	3.85537e-05
2.9	3	10	0.000299006	0.0253813	-2.22e-06	3.32e-05	0.00630029	0.03014	3.32093e-05	3.83943e-05
2.3	4	-2	0.00174967	0.0108804	9.96e-06	1.07e-05	0.00374949	0.0241127	9.24718e-06	3.87926e-05
1.5	4	0	0.00167239	0.0113198	9.8e-06	1.08e-05	0.00378352	0.0196439	9.94779e-06	3.84205e-05
1.7	4	0	0.0014904	0.0131866	8.83e-06	1.3e-05	0.0039873	0.0216056	1.30162e-05	3.71069e-05
2.3	4	0	0.00123585	0.0184042	6.58e-06	2.34e-05	0.00445856	0.0264281	2.33617e-05	3.71087e-05
1.5	4	2	0.00125441	0.0151361	8e-06	1.66e-05	0.0041597	0.024149	1.66369e-05	3.32205e-05
1.7	4	2	0.00125548	0.0161462	7.68e-06	1.87e-05	0.00422693	0.0262401	1.87112e-05	3.27168e-05
1.9	4	2	0.0010803	0.0175796	6.4e-06	2.12e-05	0.00449481	0.0259872	2.11843e-05	3.42406e-05
2.3	4	2	0.000960859	0.0195877	4.76e-06	2.48e-05	0.00483805	0.0268599	2.48335e-05	3.60864e-05
2.5	4	2	0.000913492	0.0203709	3.93e-06	2.61e-05	0.00501264	0.0271776	2.61023e-05	3.66831e-05
1.5	4	4	0.00106605	0.0174786	7.19e-06	2.15e-05	0.00432923	0.0260084	2.15426e-05	3.43955e-05
1.7	4	4	0.000988422	0.0186858	6.38e-06	2.39e-05	0.00449932	0.0266286	2.3916e-05	3.55433e-05
2.1	4	4	0.000862162	0.0205469	4.66e-06	2.72e-05	0.00485887	0.0274403	2.72315e-05	3.71365e-05
2.3	4	4	0.000809368	0.021293	3.77e-06	2.84e-05	0.00504711	0.0277007	2.83598e-05	3.76215e-05
2.5	4	4	0.0007612	0.0219548	2.84e-06	2.92e-05	0.00524108	0.0279577	2.92244e-05	3.79352e-05
2.7	4	4	0.000715292	0.0225942	1.88e-06	3e-05	0.00544295	0.0281841	2.99782e-05	3.82184e-05
2.9	4	4	0.000671685	0.0232128	8.78e-07	3.06e-05	0.00565183	0.0284077	3.06294e-05	3.84675e-05
1.5	4	6	0.000935336	0.0191483	6.63e-06	2.53e-05	0.00444687	0.0269289	2.53394e-05	3.62243e-05
1.7	4	6	0.000859156	0.020171	5.75e-06	2.73e-05	0.00463117	0.0273596	2.72561e-05	3.71361e-05
1.9	4	6	0.00079702	0.0209444	4.86e-06	2.85e-05	0.00481775	0.0277488	2.84878e-05	3.75534e-05
2.1	4	6	0.000734573	0.0217304	3.9e-06	2.97e-05	0.00501963	0.0280312	2.9669e-05	3.80713e-05
2.3	4	6	0.000681673	0.0223648	2.92e-06	3.04e-05	0.00522333	0.0283217	3.04122e-05	3.82633e-05
2.5	4	6	0.000629984	0.0229995	1.9e-06	3.11e-05	0.0054379	0.0285503	3.10878e-05	3.84758e-05
2.7	4	6	0.000581145	0.0236133	8.38e-07	3.17e-05	0.00566027	0.0287685	3.16541e-05	3.8658e-05
2.9	4	6	0.00053509	0.0242016	-2.57e-07	3.21e-05	0.00588951	0.0289728	3.21048e-05	3.87777e-05
1.3	4	8	0.000913808	0.0191869	7.06e-06	2.58e-05	0.00435706	0.0270083	2.58354e-05	3.64353e-05
1.5	4	8	0.00083142	0.0201849	6.18e-06	2.77e-05	0.00454039	0.0275696	2.7714e-05	3.71681e-05
1.7	4	8	0.000753882	0.0210917	5.24e-06	2.93e-05	0.00473855	0.0279442	2.92716e-05	3.7839e-05
1.9	4	8	0.000687301	0.0218212	4.26e-06	3.03e-05	0.00494283	0.028285	3.0294e-05	3.81528e-05
2.1	4	8	0.000625251	0.0224953	3.24e-06	3.11e-05	0.00515738	0.0285707	3.10949e-05	3.83858e-05
2.3	4	8	0.000569311	0.0230968	2.18e-06	3.16e-05	0.00537839	0.0288469	3.16465e-05	3.84769e-05
2.5	4	8	0.000515077	0.023703	1.08e-06	3.21e-05	0.00561026	0.0290933	3.21426e-05	3.85905e-05
2.7	4	8	0.000464183	0.0242858	-6.67e-08	3.25e-05	0.00584974	0.0293313	3.25245e-05	3.8649e-05
2.9	4	8	0.000416656	0.0248422	-1.24e-06	3.28e-05	0.00609558	0.0295676	3.27937e-05	3.86376e-05
1.5	4	10	0.000738975	0.0209406	5.79e-06	2.94e-05	0.0046236	0.0280206	2.94129e-05	3.7754e-05
1.7	4	10	0.000661096	0.0217263	4.79e-06	3.06e-05	0.0048332	0.0284574	3.05767e-05	3.8138e-05
1.9	4	10	0.000590953	0.0224156	3.74e-06	3.14e-05	0.00505267	0.028763	3.14007e-05	3.83583e-05
2.1	4	10	0.000525849	0.0230558	2.64e-06	3.2e-05	0.00528263	0.0290461	3.20165e-05	3.84931e-05
2.3	4	10	0.000463109	0.0236937	1.48e-06	3.25e-05	0.00552495	0.0293019	3.25464e-05	3.86278e-05
2.5	4	10	0.000406954	0.0242663	3.02e-07	3.29e-05	0.00577245	0.0295766	3.28574e-05	3.86089e-05
2.7	4	10	0.00035493	0.0248098	-9.12e-07	3.3e-05	0.00602674	0.0298962	3.30472e-05	3.85122e-05
2.9	4	10	0.0003023	0.025404	-2.19e-06	3.33e-05	0.00629456	0.0300816	3.32968e-05	3.8516e-05
2.3	5	-2	0.00181554	0.0101125	1.04e-05	1.05e-05	0.0036586	0.0232083	8.12103e-06	3.98929e-05
1.5	5	0	0.00171543	0.01088	9.98e-06	1.07e-05	0.00374479	0.0189309	9.25436e-06	3.88308e-05
1.7	5	0	0.00152731	0.0128335	9.01e-06	1.24e-05	0.00394965	0.0217437	1.2411e-05	3.73363e-05
2.3	5	0	0.00124306	0.0180174	6.62e-06	2.24e-05	0.00444861	0.026183	2.2428e-05	3.66963e-05
2.5	5	0	0.00113778	0.0170814	5.54e-06	1.94e-05	0.00467621	0.025633	1.93991e-05	3.32702e-05
1.5	5	2	0.00131345	0.0149321	8.26e-06	1.63e-05	0.00410657	0.0248703	1.63428e-05	3.30198e-05
1.7	5	2	0.00125761	0.0159799	7.69e-06	1.83e-05	0.00422475	0.0261094	1.83347e-05	3.25315e-05
1.9	5	2	0.00109221	0.0173952	6.47e-06	2.08e-05	0.00448124	0.0259307	2.07901e-05	3.40045e-05
2.3	5	2	0.000973056	0.0194177	4.84e-06	2.45e-05	0.00482122	0.026817	2.44722e-05	3.58691e-05
1.5	5	4	0.00107392	0.0173698	7.23e-06	2.13e-05	0.00432215	0.0259526	2.13011e-05	3.42708e-05
1.7	5	4	0.00137144	0.0176076	8.25e-06	2.27e-05	0.00410865	0.0277962	2.27156e-05	3.37309e-05
2.1	5	4	0.000866929	0.0205074	4.69e-06	2.72e-05	0.00485287	0.0273615	2.71538e-05	3.71417e-05
2.3	5	4	0.000814519	0.0212532	3.8e-06	2.83e-05	0.00504	0.0276584	2.82865e-05	3.76262e-05
2.5	5	4	0.000766725	0.0219141	2.88e-06	2.92e-05	0.00523279	0.0279185	2.91545e-05	3.79396e-05
2.7	5	4	0.000721161	0.0225524	1.92e-06	2.99e-05	0.00543344	0.0281478	2.99118e-05	3.82224e-05
2.9	5	4	0.000677879	0.0231696	9.3e-07	3.06e-05	0.00564105	0.0283777	3.05663e-05	3.84712e-05
1.5	5	6	0.000939456	0.0191031	6.65e-06	2.52e-05	0.00444316	0.0268977	2.52358e-05	3.61857e-05
1.7	5	6	0.00086752	0.0200606	5.79e-06	2.7e-05	0.00462264	0.0273625	2.6997e-05	3.69317e-05
1.9	5	6	0.000801858	0.0208997	4.89e-06	2.84e-05	0.00481224	0.0277268	2.83922e-05	3.75134e-05
2.1	5	6	0.000739756	0.021685	3.93e-06	2.96e-05	0.0050131	0.0280124	2.95765e-05	3.80311e-05
2.3	5	6	0.000687174	0.0223184	2.96e-06	3.03e-05	0.00521574	0.028301	3.03229e-05	3.82225e-05
2.5	5	6	0.000635785	0.0229517	1.94e-06	3.1e-05	0.0054292	0.0285358	3.10011e-05	3.84343e-05
2.7	5	6	0.000587235	0.023564	8.85e-07	3.16e-05	0.0056504	0.0287556	3.15701e-05	3.86165e-05
2.9	5	6	0.000541455	0.0241506	-2.04e-07	3.2e-05	0.00587843	0.0289601	3.20232e-05	3.87361e-05
1.3	5	8	0.000917884	0.0191387	7.08e-06	2.57e-05	0.00435388	0.0269917	2.57199e-05	3.63663e-05
1.5	5	8	0.000831936	0.0202017	6.19e-06	2.78e-05	0.00453993	0.0275277	2.77624e-05	3.72633e-05
1.7	5	8	0.00075864	0.0210438	5.26e-06	2.92e-05	0.0047337	0.0279345	2.91622e-05	3.77695e-05
1.9	5	8	0.000692372	0.0217726	4.29e-06	3.02e-05	0.00493705	0.0282795	3.01877e-05	3.80828e-05
2.1	5	8	0.00063062	0.0224455	3.27e-06	3.1e-05	0.00515062	0.028568	3.09909e-05	3.83147e-05
2.3	5	8	0.000570663	0.0231152	2.19e-06	3.17e-05	0.00537652	0.0288076	3.17065e-05	3.85695e-05
2.5	5	8	0.000516613	0.0237217	1.09e-06	3.22e-05	0.00560796	0.0290541	3.22048e-05	3.86832e-05
2.7	5	8	0.000465893	0.0243012	-5.35e-08	3.26e-05	0.00584697	0.0292921	3.25794e-05	3.87312e-05
2.9	5	8	0.000418526	0.0248585	-1.22e-06	3.29e-05	0.00609233	0.0295284	3.28525e-05	3.87229e-05
1.5	5	10	0.000739586	0.0209546	5.79e-06	2.95e-05	0.00462305	0.0279886	2.94551e-05	3.78285e-05
1.7	5	10	0.000661901	0.0217408	4.79e-06	3.06e-05	0.00483237	0.0284269	3.06215e-05	3.82115e-05
1.9	5	10	0.000591942	0.0224303	3.74e-06	3.14e-05	0.00505154	0.0287324	3.14478e-05	3.84315e-05
2.1	5	10	0.000527013	0.0230708	2.65e-06	3.21e-05	0.00528116	0.0290154	3.20656e-05	3.85663e-05
2.3	5	10	0.000468853	0.023637	1.52e-06	3.24e-05	0.00551702	0.0293118	3.24308e-05	3.8531e-05
2.5	5	10	0.000408436	0.0242789	3.13e-07	3.29e-05	0.00577023	0.0295457	3.29029e-05	3.86745e-05
2.7	5	10	0.000356549	0.0248226	-8.99e-07	3.31e-05	0.00602411	0.0298622	3.30943e-05	3.85786e-05
2.9	5	10	0.000308655	0.0253409	-2.14e-06	3.32e-05	0.0062835	0.0300925	3.31856e-05	3.84205e-05
1.5	6	0	0.00171605	0.0108547	9.99e-06	1.07e-05	0.00374423	0.0188918	9.21237e-06	3.87825e-05
1.7	6	0	0.00153391	0.0127819	9.04e-06	1.23e-05	0.00394293	0.0216711	1.23262e-05	3.74597e-05
2.3	6	0	0.00124516	0.0179407	6.64e-06	2.22e-05	0.00444572	0.0261541	2.22484e-05	3.65932e-05
1.5	6	2	0.00131328	0.0149202	8.26e-06	1.63e-05	0.00410673	0.0248539	1.63163e-05	3.29921e-05
1.7	6	2	0.00125722	0.0159831	7.69e-06	1.83e-05	0.00422515	0.0260942	1.83408e-05	3.25606e-05
1.9	6	2	0.00109222	0.0173987	6.47e-06	2.08e-05	0.00448123	0.0258887	2.07984e-05	3.40333e-05
2.3	6	2	0.000973115	0.019422	4.84e-06	2.45e-05	0.00482114	0.0268048	2.44832e-05	3.58968e-05
2.5	6	2	0.000922304	0.0202715	3.99e-06	2.59e-05	0.00499942	0.027115	2.59038e-05	3.66285e-05
1.5	6	4	0.00107393	0.0173723	7.23e-06	2.13e-05	0.00432214	0.0259424	2.13072e-05	3.42906e-05
1.7	6	4	0.00137057	0.0176119	8.24e-06	2.27e-05	0.00410953	0.0277869	2.27231e-05	3.375e-05
2.1	6	4	0.000867017	0.0205106	4.69e-06	2.72e-05	0.00485276	0.0273533	2.71628e-05	3.71602e-05
2.3	6	4	0.000814639	0.0212564	3.8e-06	2.83e-05	0.00503984	0.02765	2.82958e-05	3.76443e-05
2.5	6	4	0.000766876	0.0219175	2.88e-06	2.92e-05	0.00523257	0.0279103	2.91646e-05	3.7958e-05
2.7	6	4	0.000721341	0.0225557	1.92e-06	2.99e-05	0.00543315	0.0281418	2.99221e-05	3.82405e-05
2.9	6	4	0.000678086	0.0231729	9.31e-07	3.06e-05	0.00564069	0.0283712	3.05767e-05	3.8489e-05
1.5	6	6	0.00093949	0.0191053	6.65e-06	2.52e-05	0.00444313	0.0268913	2.52419e-05	3.61997e-05
1.7	6	6	0.000867581	0.0200629	5.79e-06	2.7e-05	0.00462258	0.0273566	2.70036e-05	3.69453e-05
1.9	6	6	0.000801948	0.0209021	4.89e-06	2.84e-05	0.00481213	0.0277209	2.83992e-05	3.75268e-05
2.1	6	6	0.000739874	0.0216801	3.93e-06	2.96e-05	0.00501296	0.0280067	2.95638e-05	3.80185e-05
2.3	6	6	0.000687316	0.0223209	2.96e-06	3.03e-05	0.00521554	0.0282953	3.03306e-05	3.82356e-05
2.5	6	6	0.00063595	0.0229542	1.94e-06	3.1e-05	0.00542896	0.0285301	3.10091e-05	3.84475e-05
2.7	6	6	0.000587424	0.0235666	8.87e-07	3.16e-05	0.00565009	0.02875	3.15785e-05	3.86297e-05
2.9	6	6	0.000541666	0.0241531	-2.02e-07	3.2e-05	0.00587806	0.0289546	3.20318e-05	3.87492e-05
1.3	6	8	0.000917915	0.0191405	7.08e-06	2.57e-05	0.00435386	0.026987	2.57247e-05	3.63769e-05
1.5	6	8	0.000831992	0.0202036	6.19e-06	2.78e-05	0.00453988	0.0275219	2.77676e-05	3.72735e-05
1.7	6	8	0.00075872	0.0210457	5.26e-06	2.92e-05	0.00473362	0.02793	2.91679e-05	3.77797e-05
1.9	6	8	0.000692475	0.0217744	4.29e-06	3.02e-05	0.00493693	0.0282745	3.01935e-05	3.80927e-05
2.1	6	8	0.000630745	0.0224475	3.27e-06	3.1e-05	0.00515046	0.0285637	3.09973e-05	3.83249e-05
2.3	6	8	0.000570809	0.0231173	2.19e-06	3.17e-05	0.00537632	0.0288032	3.17132e-05	3.85797e-05
2.5	6	8	0.00051678	0.0237237	1.09e-06	3.22e-05	0.00560771	0.0290498	3.22115e-05	3.86932e-05
2.7	6	8	0.000466078	0.0243033	-5.2e-08	3.26e-05	0.00584667	0.0292878	3.25864e-05	3.87414e-05
2.9	6	8	0.000418728	0.0248597	-1.22e-06	3.29e-05	0.00609198	0.0295241	3.28574e-05	3.87303e-05
1.5	6	10	0.000739652	0.0209561	5.79e-06	2.95e-05	0.00462298	0.0279852	2.94595e-05	3.78364e-05
1.7	6	10	0.000661988	0.0217424	4.79e-06	3.06e-05	0.00483229	0.0284236	3.06265e-05	3.82197e-05
1.9	6	10	0.000592049	0.0224319	3.74e-06	3.15e-05	0.00505142	0.0287294	3.14529e-05	3.84395e-05
2.1	6	10	0.000527139	0.0230724	2.65e-06	3.21e-05	0.005281	0.029012	3.20709e-05	3.85742e-05
2.3	6	10	0.000468996	0.0236386	1.52e-06	3.24e-05	0.00551682	0.0293085	3.24362e-05	3.85389e-05
2.5	6	10	0.000408596	0.0242797	3.14e-07	3.29e-05	0.00576999	0.0295424	3.29062e-05	3.86798e-05
2.7	6	10	0.000356724	0.0248243	-8.98e-07	3.31e-05	0.00602383	0.0298586	3.31001e-05	3.85866e-05
2.9	6	10	0.000308844	0.0253417	-2.14e-06	3.32e-05	0.00628318	0.0300891	3.31893e-05	3.84259e-05
2.3	7	-2	0.00177701	0.0106074	1.01e-05	1.06e-05	0.00371177	0.0238584	8.84927e-06	3.93205e-05
1.5	7	0	0.00168897	0.0111651	9.87e-06	1.08e-05	0.0037686	0.0194038	9.70394e-06	3.86201e-05
1.7	7	0	0.00150375	0.0130684	8.89e-06	1.28e-05	0.00397369	0.0214528	1.28148e-05	3.73107e-05
2.3	7	0	0.00124364	0.0180907	6.63e-06	2.26e-05	0.00444781	0.0263414	2.2614e-05	3.66043e-05
1.5	7	2	0.00130426	0.0150091	8.22e-06	1.65e-05	0.00411484	0.0249977	1.64878e-05	3.27165e-05
1.7	7	2	0.00125612	0.016093	7.68e-06	1.86e-05	0.00422627	0.0261988	1.85903e-05	3.26606e-05
1.9	7	2	0.00108427	0.017518	6.42e-06	2.11e-05	0.00449029	0.0259637	2.10522e-05	3.41589e-05
2.3	7	2	0.000964924	0.0195355	4.79e-06	2.47e-05	0.00483244	0.0268464	2.4724e-05	3.60283e-05
1.5	7	4	0.00106996	0.0174236	7.21e-06	2.14e-05	0.0043257	0.025995	2.142e-05	3.43137e-05
1.7	7	4	0.000988509	0.0186943	6.38e-06	2.39e-05	0.00449923	0.0266028	2.3938e-05	3.56001e-05
2.1	7	4	0.000862433	0.0205563	4.67e-06	2.73e-05	0.00485853	0.0274193	2.72581e-05	3.71911e-05
2.3	7	4	0.000809733	0.0213026	3.77e-06	2.84e-05	0.00504661	0.0276765	2.83877e-05	3.76753e-05
2.5	7	4	0.000761656	0.0219646	2.84e-06	2.93e-05	0.0052404	0.0279342	2.92537e-05	3.79889e-05
2.7	7	4	0.000715834	0.0226041	1.88e-06	3e-05	0.00544207	0.0281612	3.00086e-05	3.82718e-05
2.9	7	4	0.000672308	0.0232229	8.83e-07	3.07e-05	0.00565075	0.0283856	3.0661e-05	3.85208e-05
1.5	7	6	0.000939244	0.0190893	6.65e-06	2.52e-05	0.00444335	0.0269361	2.51985e-05	3.60995e-05
1.7	7	6	0.000863239	0.020112	5.77e-06	2.71e-05	0.00462701	0.0273709	2.71158e-05	3.70119e-05
1.9	7	6	0.000797292	0.0209516	4.86e-06	2.85e-05	0.00481744	0.0277315	2.85088e-05	3.75932e-05
2.1	7	6	0.000739022	0.0216696	3.92e-06	2.95e-05	0.00501403	0.0280484	2.95299e-05	3.7948e-05
2.3	7	6	0.000682101	0.0223723	2.93e-06	3.04e-05	0.00522274	0.0283043	3.04353e-05	3.83024e-05
2.5	7	6	0.000630483	0.023007	1.9e-06	3.11e-05	0.00543716	0.0285336	3.11119e-05	3.85149e-05
2.7	7	6	0.000581712	0.023621	8.42e-07	3.17e-05	0.00565935	0.028752	3.16792e-05	3.86973e-05
2.9	7	6	0.000540138	0.0241345	-2.15e-07	3.2e-05	0.00588072	0.0289951	3.19695e-05	3.86541e-05
1.3	7	8	0.000917696	0.019128	7.07e-06	2.57e-05	0.00435403	0.0270208	2.56903e-05	3.63006e-05
1.5	7	8	0.000831587	0.0201903	6.19e-06	2.77e-05	0.00454024	0.0275552	2.77295e-05	3.71987e-05
1.7	7	8	0.000758138	0.021032	5.26e-06	2.91e-05	0.00473421	0.0279628	2.9127e-05	3.77057e-05
1.9	7	8	0.000687612	0.021827	4.26e-06	3.03e-05	0.00494248	0.0282715	3.03119e-05	3.8183e-05
2.1	7	8	0.000625627	0.0225012	3.24e-06	3.11e-05	0.00515691	0.028558	3.11136e-05	3.84158e-05
2.3	7	8	0.000569748	0.0231027	2.19e-06	3.17e-05	0.00537779	0.0288342	3.16659e-05	3.85067e-05
2.5	7	8	0.000515574	0.023709	1.08e-06	3.22e-05	0.00560952	0.0290806	3.21626e-05	3.86203e-05
2.7	7	8	0.000464736	0.0242903	-6.24e-08	3.25e-05	0.00584885	0.0293187	3.25408e-05	3.86738e-05
2.9	7	8	0.000417261	0.0248475	-1.24e-06	3.28e-05	0.00609453	0.0295549	3.28127e-05	3.86651e-05
1.5	7	10	0.000739173	0.0209451	5.79e-06	2.94e-05	0.00462342	0.0280103	2.94264e-05	3.77778e-05
1.7	7	10	0.000661357	0.021731	4.79e-06	3.06e-05	0.00483293	0.0284483	3.05911e-05	3.81616e-05
1.9	7	10	0.000591273	0.0224204	3.74e-06	3.14e-05	0.0050523	0.0287535	3.1416e-05	3.8382e-05
2.1	7	10	0.000526226	0.0230607	2.64e-06	3.2e-05	0.00528215	0.029036	3.20324e-05	3.85167e-05
2.3	7	10	0.000463539	0.0236978	1.49e-06	3.26e-05	0.00552435	0.029292	3.25605e-05	3.86488e-05
2.5	7	10	0.000407434	0.0242703	3.06e-07	3.29e-05	0.00577173	0.0295666	3.2872e-05	3.86299e-05
2.7	7	10	0.000355454	0.024814	-9.08e-07	3.31e-05	0.00602589	0.0298853	3.30624e-05	3.85336e-05
2.9	7	10	0.000302866	0.0254081	-2.19e-06	3.33e-05	0.00629358	0.0300716	3.33123e-05	3.85374e-05
1.9	8	-2	0.0018167	0.00959243	1.04e-05	1.05e-05	0.00365531	0.0289139	7.31166e-06	3.25116e-05
2.3	8	-2	0.00162926	0.0119336	9.17e-06	1.12e-05	0.00391565	0.0238155	1.07967e-05	3.63556e-05
1.5	8	0	0.00161573	0.0118704	9.55e-06	1.1e-05	0.00383451	0.0204582	1.0839e-05	3.77931e-05
1.7	8	0	0.00145141	0.0135976	8.64e-06	1.37e-05	0.00402707	0.022814	1.3743e-05	3.62653e-05
2.3	8	0	0.00123086	0.0188375	6.54e-06	2.44e-05	0.00446546	0.0267168	2.4446e-05	3.75291e-05
1.5	8	2	0.00129175	0.0151779	8.16e-06	1.68e-05	0.0041261	0.0252715	1.68275e-05	3.23451e-05
1.7	8	2	0.00125416	0.016353	7.67e-06	1.92e-05	0.00422827	0.026404	1.91891e-05	3.29326e-05
1.9	8	2	0.00106839	0.0177454	6.34e-06	2.15e-05	0.0045084	0.0261023	2.15361e-05	3.43685e-05
2.3	8	2	0.00139318	0.0212381	7.61e-06	3.23e-05	0.00424145	0.0285113	3.22922e-05	3.95106e-05
2.5	8	2	0.000900446	0.0205257	3.84e-06	2.64e-05	0.00503221	0.0272393	2.64165e-05	3.68249e-05
1.5	8	4	0.00105817	0.0175856	7.16e-06	2.18e-05	0.00433632	0.0260903	2.17805e-05	3.44871e-05
1.7	8	4	0.000980407	0.0187869	6.34e-06	2.41e-05	0.0045075	0.0266917	2.41419e-05	3.5641e-05
2.1	8	4	0.000853118	0.0206451	4.61e-06	2.74e-05	0.00487027	0.0274576	2.74411e-05	3.72396e-05
2.3	8	4	0.000799746	0.0213924	3.7e-06	2.86e-05	0.00506039	0.0277347	2.85639e-05	3.77245e-05
2.5	8	4	0.00075102	0.0220566	2.77e-06	2.94e-05	0.00525635	0.0279864	2.94243e-05	3.80384e-05
2.7	8	4	0.000704603	0.0227062	1.79e-06	3.02e-05	0.00546026	0.0282055	3.01938e-05	3.83477e-05
2.9	8	4	0.000664801	0.0232459	8.21e-07	3.07e-05	0.00566381	0.028461	3.06599e-05	3.84099e-05
1.5	8	6	0.000931088	0.0191796	6.61e-06	2.54e-05	0.00445069	0.0269791	2.54057e-05	3.61947e-05
1.7	8	6	0.000854456	0.0202082	5.73e-06	2.73e-05	0.00463597	0.0274038	2.73346e-05	3.71345e-05
1.9	8	6	0.00078786	0.0210485	4.81e-06	2.87e-05	0.0048282	0.0277561	2.87223e-05	3.77158e-05
2.1	8	6	0.000728991	0.0217681	3.86e-06	2.97e-05	0.00502667	0.0280672	2.9738e-05	3.80706e-05
2.3	8	6	0.000675698	0.0224034	2.88e-06	3.05e-05	0.00523157	0.0283642	3.04769e-05	3.82632e-05
[truncated: 105 more rows]

[truncated: 10 more sheets: (34,20.2), (35,20.2), (36,20.2), (37,20.2), (38,20.2), (36,15.1), (37,15.1), (38,15.1), (39,15.1), (40,15.1)]
