# Supplementary material for: Droplet Hamilton Dynamics 1: the rolling angle of a water droplet on an inclined surface
Source: Research Square preprint supplement (doi:10.21203/rs.3.rs-8817038/v1), 2026-02-10
Supplement: Supplementary file 2 [file 4279188e787d827e8fb85429.xlsx]

## Sheet: （11，30.3）
																					whole potentials of the equilibrium droplet		the unit length energy barrier
0	0	0	0.001934	0	1.18e-05	1.18e-05	0.003868	0.003868	0	4.70027e-05		(0,0,0)	-2.951	23.37	-2.293	11.01	-18590	36.98	91.59		3.202e-06		5.6e-06
0.2	0	0	0.00182916	0.00355963	1.17e-05	1.18e-05	0.00388058	0.00388897	1.00614e-06	4.55577e-05		(1,0,0)	3.867	-19.34	4.373	-6.364	51780	6.733	-49.1
0.4	0	0	0.00172801	0.00499877	1.15e-05	1.19e-05	0.00391744	0.0039504	1.97162e-06	4.4539e-05		(0,1,0)	3.67	1.157	3.469	2.895	6.105	0.0894	-0.942
0.6	0	0	0.00162685	0.00609251	1.12e-05	1.21e-05	0.00397857	0.00405229	2.89831e-06	4.35525e-05		(0,0,1)	-1.096	3.614	-1.038	1.205	497.3	14.4	0.536
0.75	0	0	0.00157958	0.00625147	1.09e-05	1.22e-05	0.00402749	0.00413382	3.0262e-06	4.24396e-05		(2,0,0)	2.236	-11.14	2.037	-6.154	-52390	-10.1	-45.2
0.8	0	0	0.00147922	0.00916912	1.06e-05	1.24e-05	0.0040863	0.00423182	6.44551e-06	4.09192e-05		(1,1,0)	5.83	5.948	5.969	5.965	-128.3	1.29	1.6
0.85	0	0	0.00140572	0.010924	1.04e-05	1.26e-05	0.00413743	0.00431704	9.07028e-06	3.99975e-05		(1,0,1)	1.826	-8.335	1.758	-2.83	-1073	-32.2	-1.74
0.9	0	0	0.00134796	0.0121615	1.01e-05	1.27e-05	0.00418446	0.00439543	1.11531e-05	3.9397e-05		(0,2,0)	3.527	1.027	3.335	2.798	-248	0.118	-1.12
1	0	0	0.0012799	0.0136738	9.76e-06	1.39e-05	0.00426046	0.0045221	1.39212e-05	3.95712e-05		(0,1,1)	0.9524	0.9517	0.9526	0.9525	61.95	0.951	0.952
1.1	0	0	0.00122006	0.0148424	9.36e-06	1.62e-05	0.0043392	0.00465334	1.61891e-05	3.97463e-05		(0,0,2)	0.03165	-0.02488	0.03532	-0.007688	-3.246	-0.11	0.00746
1.2	0	0	0.0011714	0.0157909	8.97e-06	1.81e-05	0.00441707	0.00491286	1.80904e-05	4.00078e-05		(3,0,0)	-0.3438	26.43	-0.7754	9.966	23020	-17.2	60.3
1.3	0	0	0.00113534	0.0165867	8.6e-06	1.97e-05	0.00449095	0.00514521	1.97192e-05	4.04499e-05		(2,1,0)	2.774	4.704	3.093	4.087	290.1	9.44	-0.387
1.5	0	0	0.00107604	0.0179138	7.84e-06	2.24e-05	0.00464016	0.00552427	2.24497e-05	4.13558e-05		(2,0,1)	-0.8144	6.157	-0.8147	2.123	761.4	23.6	1.79
1.7	0	0	0.00102873	0.0190164	7.08e-06	2.47e-05	0.00479138	0.00583004	2.46913e-05	4.2234e-05		(1,2,0)	1.706	0.9878	1.741	1.454	-346.9	-1.46	0.766
1.2	0	-5	0.000914043	0.0222479	8.03e-06	3.48e-05	0.00460237	0.00687099	3.48393e-05	4.28753e-05		(1,1,1)	3.754	3.456	4.134	4.107	93.68	2.58	1.56
1.3	0	-5	0.000891045	0.0225758	7.63e-06	3.54e-05	0.0046815	0.00695071	3.54179e-05	4.25126e-05		(1,0,2)	-0.0439	0.0324	-0.04954	0.01024	4.557	0.153	-0.0116
1.4	0	-5	0.00087332	0.0228765	7.24e-06	3.59e-05	0.00475897	0.00702219	3.59181e-05	4.22424e-05		(0,3,0)	2.814	0.9142	2.663	2.248	-902.6	0.2612	-0.867
1.5	0	-5	0.000854118	0.0231693	6.83e-06	3.64e-05	0.00483989	0.00709005	3.6371e-05	4.19563e-05		(0,2,1)	0.7627	0.7604	0.7632	0.7619	305.8	0.7539	0.7609
1.6	0	-5	0.000838354	0.023446	6.43e-06	3.68e-05	0.00491982	0.00715295	3.67757e-05	4.17286e-05		(0,1,2)	0.76	0.7604	0.7784	0.7652	0.7786	0.7724	0.7686
1.7	0	-5	0.00082407	0.0237108	6.02e-06	3.71e-05	0.00500013	0.00721194	3.71385e-05	4.15314e-05		(0,0,3)	-0.0001924	9.215e-05	-0.0002203	2.629e-05	0.009108	0.0004067	-3.92e-05
1.8	0	-5	0.000811857	0.0239645	5.61e-06	3.75e-05	0.00507991	0.00726748	3.74666e-05	4.13697e-05		(4,0,0)	0.09797	-8.878	-0.3349	-3.15	-3727	8.054	-15.5
1.9	0	-5	0.00079577	0.024224	5.18e-06	3.78e-05	0.00516558	0.00732299	3.77757e-05	4.11502e-05		(3,1,0)	0.2307	-18.56	0.01449	-7.291	-1294	-69.2	-5.49
2	0	-5	0.000784727	0.0244657	4.77e-06	3.81e-05	0.00524713	0.00737406	3.80507e-05	4.10132e-05		(3,0,1)	0.04907	-1.487	0.05924	-0.5192	-177.3	-5.58	-0.591
1.2	0	-4	0.000966716	0.0216384	8.22e-06	3.32e-05	0.00456444	0.00669273	3.316e-05	4.38158e-05		(2,2,0)	-1.032	13.11	-0.7663	4.695	934.9	49.74	4.818
1.3	0	-4	0.000942879	0.021994	7.84e-06	3.38e-05	0.00464107	0.00678226	3.38358e-05	4.34108e-05		(2,1,1)	0.1351	-0.222	0.1345	-0.07798	-19.22	-0.662	-0.0909
1.4	0	-4	0.000921054	0.0223238	7.44e-06	3.44e-05	0.00471887	0.00686315	3.4424e-05	4.30471e-05		(2,0,2)	0.0149	-0.008865	0.0171	-0.002939	-1.542	-0.0503	0.004567
1.5	0	-4	0.000905023	0.0226203	7.06e-06	3.49e-05	0.00479408	0.00693417	3.49215e-05	4.27902e-05		(1,3,0)	-0.3933	-3.945	-0.5354	-1.905	-177.1	-12.5	-1.54
1.6	0	-4	0.000886942	0.0229122	6.66e-06	3.54e-05	0.00487318	0.00700249	3.53807e-05	4.25043e-05		(1,2,1)	-0.8232	-0.5793	-0.8975	-0.7821	-8.853	-0.185	-0.264
1.7	0	-4	0.000872538	0.0231847	6.27e-06	3.58e-05	0.00495069	0.00706502	3.57859e-05	4.22833e-05		(1,1,2)	0.001568	-0.00103	0.00164	-0.0003169	-0.107	-0.00261	-0.000401
1.8	0	-4	0.000857386	0.0234522	5.86e-06	3.62e-05	0.00503074	0.00712514	3.61588e-05	4.20557e-05		(1,0,3)	0.0001393	-6.095e-05	0.0001589	-1.708e-05	-0.006433	-0.000273	3.02e-05
1.9	0	-4	0.000845986	0.0237037	5.47e-06	3.65e-05	0.00510834	0.00718083	3.64935e-05	4.18908e-05		(0,4,0)	-0.7523	0.05646	-0.6977	-0.4712	211.5	0.977	0.346
2	0	-4	0.000833755	0.0239534	5.07e-06	3.68e-05	0.00518829	0.00723514	3.68065e-05	4.17155e-05		(0,3,1)	-0.1811	-0.2041	-0.1816	-0.1954	-64.89	-0.23	-0.197
1.2	0	-3	0.00101602	0.0209953	8.4e-06	3.14e-05	0.00452895	0.00650293	3.13991e-05	4.47609e-05		(0,2,2)	-0.1524	-0.1518	-0.1561	-0.153	-0.1292	-0.154	-0.154
1.3	0	-3	0.000991355	0.0213889	8.03e-06	3.22e-05	0.00460326	0.00660547	3.21963e-05	4.43137e-05		(0,1,3)	4.705e-06	-1.635e-06	4.952e-06	-4.528e-07	-0.0001686	-3.14e-06	-8.7e-07
1.4	0	-3	0.00096821	0.0217504	7.64e-06	3.29e-05	0.00467926	0.00669716	3.28872e-05	4.39053e-05		(0,0,4)	3.352e-07	-1.396e-07	3.949e-07	-4.028e-08	-9.424e-06	-6.48e-07	5.81e-08
1.5	0	-3	0.000947932	0.0220805	7.26e-06	3.35e-05	0.00475546	0.00677877	3.34809e-05	4.35576e-05
1.6	0	-3	0.000930069	0.0223873	6.87e-06	3.4e-05	0.00483177	0.00685286	3.4001e-05	4.32567e-05
1.7	0	-3	0.000915472	0.022671	6.49e-06	3.45e-05	0.0049069	0.00691992	3.44552e-05	4.30161e-05
1.8	0	-3	0.000900101	0.0229482	6.1e-06	3.49e-05	0.00498461	0.00698403	3.48727e-05	4.27688e-05
1.9	0	-3	0.000888045	0.0232071	5.71e-06	3.52e-05	0.00506039	0.00704289	3.52431e-05	4.25789e-05
2	0	-3	0.000875112	0.0234637	5.32e-06	3.56e-05	0.00513867	0.00710018	3.559e-05	4.23775e-05
1.2	0	-2	0.00106947	0.020278	8.6e-06	2.95e-05	0.00449046	0.00629038	2.9475e-05	4.58352e-05
1.3	0	-2	0.00104148	0.0207289	8.23e-06	3.04e-05	0.00456416	0.0064115	3.04325e-05	4.52955e-05
1.4	0	-2	0.00101716	0.0211294	7.85e-06	3.12e-05	0.00463814	0.00651641	3.12429e-05	4.48404e-05
1.5	0	-2	0.000995329	0.021493	7.47e-06	3.19e-05	0.0047128	0.00660929	3.19406e-05	4.44446e-05
1.6	0	-2	0.000975482	0.021829	7.09e-06	3.26e-05	0.00478818	0.00669313	3.25518e-05	4.40923e-05
1.7	0	-2	0.000956302	0.0221475	6.7e-06	3.31e-05	0.00486525	0.00677082	3.31e-05	4.3758e-05
1.8	0	-2	0.000940681	0.0224385	6.32e-06	3.36e-05	0.00494078	0.00684017	3.35717e-05	4.34936e-05
1.9	0	-2	0.000925763	0.022718	5.93e-06	3.4e-05	0.00501739	0.00690549	3.40011e-05	4.32438e-05
2	0	-2	0.000912152	0.0229849	5.54e-06	3.44e-05	0.00509422	0.0069667	3.43892e-05	4.30198e-05
1.2	0	-1	0.0011217	0.0194861	8.79e-06	2.74e-05	0.00445285	0.0060538	2.7386e-05	4.69892e-05
1.3	0	-1	0.00108874	0.0200239	8.41e-06	2.86e-05	0.0045273	0.00620248	2.85686e-05	4.62963e-05
1.4	0	-1	0.00106363	0.0204692	8.05e-06	2.95e-05	0.00459911	0.00632246	2.95068e-05	4.57881e-05
1.5	0	-1	0.00103951	0.0208775	7.67e-06	3.03e-05	0.00467304	0.00642994	3.03309e-05	4.53192e-05
1.6	0	-1	0.00101869	0.0212437	7.3e-06	3.1e-05	0.0047467	0.00652407	3.10347e-05	4.4929e-05
1.7	0	-1	0.000999556	0.0215835	6.92e-06	3.17e-05	0.00482113	0.00660949	3.16568e-05	4.45782e-05
1.8	0	-1	0.000979511	0.0219123	6.53e-06	3.22e-05	0.00489885	0.00669037	3.22286e-05	4.42217e-05
1.9	0	-1	0.000964135	0.0222078	6.15e-06	3.27e-05	0.00497365	0.00676149	3.27152e-05	4.39515e-05
2	0	-1	0.000947766	0.0224982	5.76e-06	3.32e-05	0.00505148	0.00683002	3.3169e-05	4.36702e-05
1.2	0	1	0.00122393	0.0174664	9.16e-06	2.23e-05	0.00437925	0.00544243	2.22715e-05	4.97288e-05
1.3	0	1	0.00118739	0.0182497	8.8e-06	2.4e-05	0.00445036	0.00567026	2.40309e-05	4.87822e-05
1.4	0	1	0.00115214	0.0189306	8.43e-06	2.55e-05	0.00452477	0.00586442	2.55447e-05	4.79127e-05
1.5	0	1	0.00112502	0.0194741	8.06e-06	2.67e-05	0.00459609	0.0060158	2.67206e-05	4.72653e-05
1.6	0	1	0.00110041	0.0199492	7.7e-06	2.77e-05	0.00466824	0.0061452	2.77151e-05	4.6709e-05
1.7	0	1	0.00107935	0.0203636	7.34e-06	2.85e-05	0.00473975	0.00625547	2.85484e-05	4.62546e-05
1.8	0	1	0.00105729	0.0207588	6.96e-06	2.93e-05	0.00481485	0.00635847	2.93131e-05	4.58024e-05
1.9	0	1	0.00103882	0.0211106	6.58e-06	3e-05	0.0048885	0.00644811	2.99624e-05	4.54363e-05
2	0	1	0.00102472	0.0214217	6.23e-06	3.05e-05	0.00495913	0.00652571	3.05098e-05	4.51608e-05
1.2	0	2	0.00128104	0.0161276	9.37e-06	1.91e-05	0.00433813	0.00503362	1.91175e-05	5.13696e-05
1.3	0	2	0.00123843	0.0171084	9e-06	2.13e-05	0.00441055	0.00532415	2.12578e-05	5.02452e-05
1.4	0	2	0.0012012	0.0179166	8.63e-06	2.3e-05	0.00448355	0.00555938	2.30359e-05	4.92786e-05
1.5	0	2	0.00116658	0.0186165	8.25e-06	2.46e-05	0.00455868	0.00575936	2.45678e-05	4.84046e-05
1.6	0	2	0.00114406	0.0191455	7.91e-06	2.57e-05	0.00462634	0.00590728	2.57002e-05	4.78252e-05
1.7	0	2	0.00111975	0.0196433	7.55e-06	2.67e-05	0.00469854	0.00604384	2.67408e-05	4.72432e-05
1.8	0	2	0.00109693	0.020091	7.17e-06	2.76e-05	0.00477204	0.00616404	2.76458e-05	4.67237e-05
1.9	0	2	0.00107741	0.0204849	6.81e-06	2.84e-05	0.00484451	0.00626749	2.84104e-05	4.62959e-05
2	0	2	0.00105935	0.0208468	6.44e-06	2.91e-05	0.00491758	0.00636054	2.90843e-05	4.59166e-05
1.2	0	3	0.00134909	0.0140705	9.62e-06	1.47e-05	0.00428914	0.0045699	1.46705e-05	5.36509e-05
1.3	0	3	0.00129364	0.0157139	9.22e-06	1.81e-05	0.00436748	0.00489869	1.80615e-05	5.18858e-05
1.4	0	3	0.00125019	0.0167606	8.84e-06	2.03e-05	0.0044424	0.00520926	2.02958e-05	5.07016e-05
1.5	0	3	0.00121539	0.0175589	8.48e-06	2.2e-05	0.00451475	0.00544163	2.20127e-05	4.97898e-05
1.6	0	3	0.00118118	0.0182775	8.09e-06	2.36e-05	0.00459071	0.00564735	2.35583e-05	4.8914e-05
1.7	0	3	0.00115869	0.0188234	7.75e-06	2.47e-05	0.00465882	0.00580052	2.47127e-05	4.83205e-05
1.8	0	3	0.00113514	0.0193359	7.38e-06	2.58e-05	0.00473077	0.00594184	2.57767e-05	4.77329e-05
1.9	0	3	0.00111461	0.0197871	7.02e-06	2.67e-05	0.0048021	0.0060638	2.66873e-05	4.72329e-05
2	0	3	0.00109288	0.0202181	6.64e-06	2.75e-05	0.00487734	0.00617812	2.75312e-05	4.67338e-05
1.4	0	4	0.00130609	0.015198	9.08e-06	1.68e-05	0.00439545	0.00474708	1.68172e-05	5.24824e-05
1.5	0	4	0.00126305	0.0163637	8.69e-06	1.93e-05	0.00447185	0.0050799	1.92526e-05	5.12022e-05
1.6	0	4	0.00122759	0.0172074	8.32e-06	2.1e-05	0.00454616	0.00532608	2.10324e-05	5.02531e-05
1.7	0	4	0.00119827	0.0178915	7.95e-06	2.25e-05	0.00461845	0.00552208	2.24726e-05	4.94836e-05
1.8	0	4	0.00117445	0.0184639	7.6e-06	2.37e-05	0.00468832	0.00568321	2.3665e-05	4.88585e-05
1.9	0	4	0.00115058	0.0190008	7.23e-06	2.48e-05	0.0047611	0.00583202	2.47702e-05	4.82465e-05
2	0	4	0.00113027	0.0194695	6.87e-06	2.57e-05	0.00483248	0.00595955	2.57128e-05	4.77316e-05
1.6	0	5	0.00128099	0.0158	8.58e-06	1.79e-05	0.00449489	0.00491281	1.78816e-05	5.19033e-05
1.7	0	5	0.00124564	0.0167455	8.2e-06	1.98e-05	0.00457012	0.00517819	1.98407e-05	5.08728e-05
1.8	0	5	0.00121433	0.0174925	7.82e-06	2.14e-05	0.00464525	0.00539326	2.13885e-05	5.00356e-05
1.9	0	5	0.00118625	0.0181308	7.43e-06	2.27e-05	0.00472044	0.00557373	2.27013e-05	4.93085e-05
2	0	5	0.00116642	0.0186382	7.09e-06	2.37e-05	0.0047891	0.00571457	2.37274e-05	4.87813e-05
1.7	0	6	0.00129384	0.015175	8.44e-06	1.64e-05	0.00452096	0.00495626	1.64247e-05	5.25878e-05
1.8	0	6	0.00125918	0.0162612	8.06e-06	1.86e-05	0.0045968	0.00508267	1.86289e-05	5.14496e-05
1.9	0	6	0.00122746	0.0170923	7.67e-06	2.03e-05	0.00467346	0.00526409	2.03284e-05	5.05386e-05
2	0	6	0.00120491	0.0176968	7.32e-06	2.15e-05	0.00474291	0.00543558	2.15496e-05	4.99183e-05
1.9	0	7	0.00127754	0.0155483	7.96e-06	1.7e-05	0.00461636	0.00511527	1.69774e-05	5.22743e-05
2	0	7	0.00124604	0.0165278	7.57e-06	1.89e-05	0.00469355	0.00524391	1.89463e-05	5.12446e-05
1.2	0.5	-5	0.000903255	0.022357	7.99e-06	3.51e-05	0.00461014	0.00690258	3.51376e-05	4.26939e-05
1.3	0.5	-5	0.000882114	0.0226774	7.6e-06	3.57e-05	0.00468847	0.00698011	3.56975e-05	4.23657e-05
1.4	0.5	-5	0.000863746	0.0229777	7.2e-06	3.62e-05	0.00476701	0.00705108	3.61901e-05	4.20895e-05
1.5	0.5	-5	0.000846644	0.0232633	6.8e-06	3.66e-05	0.00484662	0.00711697	3.66273e-05	4.18423e-05
1.6	0.5	-5	0.000830359	0.0235394	6.39e-06	3.7e-05	0.00492749	0.00717937	3.70244e-05	4.16116e-05
1.7	0.5	-5	0.0008156	0.0238045	5.97e-06	3.74e-05	0.00500877	0.00723809	3.73817e-05	4.14103e-05
1.8	0.5	-5	0.000801534	0.0240615	5.56e-06	3.77e-05	0.00509106	0.00729386	3.77047e-05	4.12239e-05
1.9	0.5	-5	0.000787587	0.0243138	5.13e-06	3.8e-05	0.00517491	0.00734762	3.80013e-05	4.10427e-05
2	0.5	-5	0.00077618	0.024556	4.72e-06	3.83e-05	0.00525738	0.00739851	3.82716e-05	4.09023e-05
1.2	0.5	-4	0.000958986	0.0217296	8.2e-06	3.34e-05	0.00457001	0.00671946	3.34098e-05	4.36745e-05
1.3	0.5	-4	0.000934552	0.0220832	7.8e-06	3.41e-05	0.00464757	0.00680805	3.40752e-05	4.32616e-05
1.4	0.5	-4	0.000914667	0.0224034	7.42e-06	3.46e-05	0.00472424	0.00688621	3.46403e-05	4.29351e-05
1.5	0.5	-4	0.000898217	0.0226992	7.03e-06	3.51e-05	0.00480021	0.00695673	3.51313e-05	4.26741e-05
1.6	0.5	-4	0.000882257	0.0229837	6.64e-06	3.56e-05	0.00487767	0.00702313	3.55764e-05	4.24241e-05
1.7	0.5	-4	0.000864958	0.023263	6.23e-06	3.6e-05	0.00495842	0.00708681	3.59841e-05	4.21602e-05
1.8	0.5	-4	0.000852036	0.0235236	5.83e-06	3.63e-05	0.00503652	0.00714528	3.63463e-05	4.19698e-05
1.9	0.5	-4	0.000837751	0.023783	5.42e-06	3.67e-05	0.00511772	0.00720234	3.66843e-05	4.17612e-05
2	0.5	-4	0.000825227	0.0240325	5.01e-06	3.7e-05	0.00519853	0.00725634	3.69916e-05	4.15851e-05
1.2	0.5	-3	0.00101157	0.021071	8.39e-06	3.16e-05	0.00453215	0.00652556	3.16095e-05	4.46694e-05
1.3	0.5	-3	0.000986471	0.0214617	8.01e-06	3.24e-05	0.00460707	0.00662696	3.23958e-05	4.42187e-05
1.4	0.5	-3	0.000962932	0.0218208	7.62e-06	3.31e-05	0.0046837	0.00671769	3.3077e-05	4.38067e-05
1.5	0.5	-3	0.000942295	0.0221496	7.23e-06	3.37e-05	0.00476053	0.00679866	3.36635e-05	4.34547e-05
1.6	0.5	-3	0.000926464	0.0224472	6.85e-06	3.42e-05	0.00483524	0.00687028	3.41643e-05	4.31896e-05
1.7	0.5	-3	0.000909244	0.0227388	6.46e-06	3.46e-05	0.00491325	0.00693893	3.46266e-05	4.2906e-05
1.8	0.5	-3	0.000895992	0.0230075	6.07e-06	3.5e-05	0.00498905	0.00700092	3.50288e-05	4.26952e-05
1.9	0.5	-3	0.000881307	0.0232738	5.67e-06	3.54e-05	0.00506807	0.00706111	3.54034e-05	4.24656e-05
2	0.5	-3	0.000868144	0.0235303	5.27e-06	3.57e-05	0.00514703	0.00711814	3.57459e-05	4.22628e-05
1.2	0.5	-2	0.00106486	0.0203524	8.58e-06	2.97e-05	0.00449378	0.00631262	2.96755e-05	4.57372e-05
1.3	0.5	-2	0.00103579	0.020804	8.2e-06	3.06e-05	0.00456861	0.0064336	3.06313e-05	4.51807e-05
1.4	0.5	-2	0.00101112	0.0212014	7.83e-06	3.14e-05	0.00464322	0.00653731	3.14303e-05	4.47251e-05
1.5	0.5	-2	0.000988972	0.0215637	7.44e-06	3.21e-05	0.00471853	0.00662957	3.21217e-05	4.43241e-05
1.6	0.5	-2	0.000968842	0.0218977	7.06e-06	3.27e-05	0.00479455	0.00671256	3.27238e-05	4.39707e-05
1.7	0.5	-2	0.000951614	0.0222057	6.68e-06	3.32e-05	0.00487003	0.00678738	3.3249e-05	4.36723e-05
1.8	0.5	-2	0.000935777	0.0224962	6.29e-06	3.37e-05	0.00494608	0.00685641	3.37166e-05	4.34049e-05
1.9	0.5	-2	0.00092292	0.0227664	5.91e-06	3.41e-05	0.00502063	0.00691938	3.41289e-05	4.3191e-05
2	0.5	-2	0.000906868	0.0230421	5.51e-06	3.45e-05	0.00510056	0.00698239	3.45264e-05	4.29264e-05
1.2	0.5	-1	0.00111653	0.019567	8.77e-06	2.76e-05	0.00445658	0.00607805	2.75972e-05	4.68698e-05
1.3	0.5	-1	0.00108603	0.0200838	8.4e-06	2.87e-05	0.00452941	0.0062205	2.87298e-05	4.62299e-05
1.4	0.5	-1	0.00105782	0.0205415	8.02e-06	2.97e-05	0.00460399	0.00634356	2.96919e-05	4.56698e-05
1.5	0.5	-1	0.00103631	0.0209324	7.66e-06	3.05e-05	0.00467593	0.00644614	3.04766e-05	4.52525e-05
1.6	0.5	-1	0.00101166	0.0213148	7.27e-06	3.12e-05	0.00475344	0.0065442	3.12091e-05	4.47969e-05
1.7	0.5	-1	0.0009923	0.0216531	6.89e-06	3.18e-05	0.00482853	0.00662895	3.1824e-05	4.44444e-05
1.8	0.5	-1	0.000976241	0.0219612	6.51e-06	3.24e-05	0.00490238	0.0067044	3.23545e-05	4.41587e-05
1.9	0.5	-1	0.000958583	0.0222655	6.12e-06	3.29e-05	0.00497998	0.00677745	3.28528e-05	4.38512e-05
2	0.5	-1	0.000944186	0.0225458	5.74e-06	3.33e-05	0.00505578	0.00684336	3.3287e-05	4.36045e-05
1.2	0.5	0	0.00116851	0.0186505	8.96e-06	2.52e-05	0.00441915	0.00580204	2.5227e-05	4.81666e-05
1.3	0.5	0	0.00113339	0.0192907	8.59e-06	2.67e-05	0.00449247	0.00598364	2.6666e-05	4.7343e-05
1.4	0.5	0	0.00110542	0.0198104	8.23e-06	2.78e-05	0.00456401	0.00612743	2.77959e-05	4.67188e-05
1.5	0.5	0	0.00108091	0.0202622	7.86e-06	2.87e-05	0.00463579	0.00624953	2.87418e-05	4.61987e-05
1.6	0.5	0	0.00105656	0.0206794	7.49e-06	2.96e-05	0.00471034	0.00635972	2.958e-05	4.57092e-05
1.7	0.5	0	0.0010361	0.0210494	7.11e-06	3.03e-05	0.00478386	0.00645516	3.02891e-05	4.5313e-05
1.8	0.5	0	0.00101751	0.0213916	6.74e-06	3.09e-05	0.00485781	0.00654158	3.09157e-05	4.49611e-05
1.9	0.5	0	0.000999234	0.0217172	6.36e-06	3.15e-05	0.00493363	0.00662208	3.14836e-05	4.46268e-05
2	0.5	0	0.00098429	0.0220147	5.98e-06	3.2e-05	0.00500765	0.00669417	3.19775e-05	4.43561e-05
1.2	0.5	1	0.00121823	0.0175742	9.14e-06	2.25e-05	0.00438336	0.00547512	2.2532e-05	4.95761e-05
1.3	0.5	1	0.00118139	0.0183496	8.78e-06	2.43e-05	0.00445504	0.00570022	2.42759e-05	4.86274e-05
1.4	0.5	1	0.00115103	0.0189802	8.42e-06	2.57e-05	0.0045257	0.00587954	2.56746e-05	4.78687e-05
1.5	0.5	1	0.00112374	0.0195202	8.06e-06	2.68e-05	0.00459723	0.00602976	2.68422e-05	4.7222e-05
1.6	0.5	1	0.00109899	0.0199923	7.69e-06	2.78e-05	0.00466961	0.00615814	2.78288e-05	4.66678e-05
1.7	0.5	1	0.0010778	0.0204053	7.33e-06	2.87e-05	0.00474133	0.0062679	2.86582e-05	4.62118e-05
1.8	0.5	1	0.00105561	0.0207985	6.95e-06	2.94e-05	0.00481667	0.0063702	2.94169e-05	4.57609e-05
1.9	0.5	1	0.00103703	0.021149	6.57e-06	3.01e-05	0.00489054	0.00645935	3.00619e-05	4.53952e-05
2	0.5	1	0.00102009	0.0214752	6.2e-06	3.06e-05	0.00496469	0.00654065	3.06356e-05	4.50706e-05
1.2	0.5	2	0.00127918	0.016203	9.36e-06	1.93e-05	0.00433947	0.00505688	1.92924e-05	5.1302e-05
1.3	0.5	2	0.00123063	0.0172382	8.97e-06	2.16e-05	0.00441663	0.00536324	2.15601e-05	5.00478e-05
1.4	0.5	2	0.00119487	0.0180212	8.61e-06	2.33e-05	0.00448887	0.00559066	2.32855e-05	4.91158e-05
1.5	0.5	2	0.00116501	0.0186688	8.25e-06	2.47e-05	0.00456009	0.00577522	2.47004e-05	4.83489e-05
1.6	0.5	2	0.00113731	0.0192374	7.88e-06	2.59e-05	0.00463282	0.00593413	2.59204e-05	4.76642e-05
1.7	0.5	2	0.00111794	0.0196892	7.54e-06	2.69e-05	0.00470038	0.00605752	2.68579e-05	4.71908e-05
1.8	0.5	2	0.001095	0.0201344	7.16e-06	2.78e-05	0.00477412	0.00617686	2.77561e-05	4.66724e-05
1.9	0.5	2	0.00107538	0.0205264	6.79e-06	2.85e-05	0.00484683	0.00627961	2.8515e-05	4.62455e-05
2	0.5	2	0.00105722	0.0208868	6.42e-06	2.92e-05	0.00492013	0.00637212	2.91841e-05	4.58668e-05
1.2	0.5	3	0.00134165	0.0143055	9.59e-06	1.52e-05	0.00429449	0.00457882	1.51512e-05	5.33867e-05
1.3	0.5	3	0.00129138	0.0157985	9.21e-06	1.83e-05	0.00436924	0.0049247	1.82511e-05	5.18023e-05
1.4	0.5	3	0.00124775	0.0168314	8.83e-06	2.05e-05	0.00444445	0.00523083	2.04607e-05	5.06251e-05
1.5	0.5	3	0.00121279	0.0176248	8.46e-06	2.22e-05	0.00451709	0.00546156	2.21699e-05	4.97117e-05
1.6	0.5	3	0.00117928	0.0183316	8.08e-06	2.37e-05	0.00459253	0.00566366	2.36909e-05	4.88522e-05
1.7	0.5	3	0.00115668	0.0188745	7.74e-06	2.48e-05	0.00466086	0.00581582	2.4839e-05	4.82602e-05
1.8	0.5	3	0.00113303	0.0193847	7.37e-06	2.59e-05	0.00473305	0.00595631	2.58975e-05	4.76719e-05
1.9	0.5	3	0.0011124	0.0198334	7.01e-06	2.68e-05	0.00480462	0.0060774	2.68016e-05	4.7173e-05
2	0.5	3	0.00109058	0.020262	6.63e-06	2.76e-05	0.0048801	0.00619088	2.76387e-05	4.66755e-05
1.4	0.5	4	0.00130353	0.0152978	9.07e-06	1.7e-05	0.00439759	0.00476317	1.70327e-05	5.23819e-05
1.5	0.5	4	0.00126034	0.0164408	8.68e-06	1.94e-05	0.0044743	0.00510333	1.94266e-05	5.11167e-05
1.6	0.5	4	0.00122473	0.0172759	8.3e-06	2.12e-05	0.0045489	0.0053467	2.11907e-05	5.01701e-05
1.7	0.5	4	0.00119807	0.0179259	7.95e-06	2.26e-05	0.00461865	0.00553265	2.25583e-05	4.94618e-05
1.8	0.5	4	0.0011722	0.0185174	7.58e-06	2.38e-05	0.00469074	0.00569914	2.3793e-05	4.87929e-05
1.9	0.5	4	0.00114824	0.0190524	7.22e-06	2.49e-05	0.00476376	0.00584727	2.48944e-05	4.81792e-05
2	0.5	4	0.00112785	0.0195187	6.85e-06	2.58e-05	0.00483538	0.00597394	2.5831e-05	4.76653e-05
1.5	0.5	5	0.00131662	0.0146369	8.94e-06	1.55e-05	0.00442364	0.00479407	1.55261e-05	5.3098e-05
1.6	0.5	5	0.00127808	0.0158921	8.56e-06	1.81e-05	0.00449768	0.00492843	1.80823e-05	5.18021e-05
1.7	0.5	5	0.00124261	0.0168209	8.18e-06	2e-05	0.00457322	0.00520088	2.00098e-05	5.07822e-05
1.8	0.5	5	0.00121118	0.0175603	7.8e-06	2.15e-05	0.00464864	0.00541346	2.15429e-05	4.9948e-05
1.9	0.5	5	0.001183	0.0181954	7.42e-06	2.28e-05	0.00472413	0.00559281	2.28499e-05	4.922e-05
2	0.5	5	0.00116391	0.0186922	7.07e-06	2.39e-05	0.0047921	0.00573047	2.38537e-05	4.87096e-05
1.7	0.5	6	0.00129078	0.0152865	8.43e-06	1.67e-05	0.00452409	0.00496148	1.66585e-05	5.24675e-05
1.8	0.5	6	0.001256	0.0163496	8.04e-06	1.88e-05	0.00460024	0.00508839	1.88214e-05	5.13449e-05
1.9	0.5	6	0.00122418	0.0171667	7.65e-06	2.05e-05	0.00467719	0.00528622	2.04933e-05	5.04441e-05
2	0.5	6	0.00120155	0.0177651	7.3e-06	2.17e-05	0.00474694	0.00545573	2.17024e-05	4.98268e-05
1.9	0.5	7	0.00127427	0.0156577	7.94e-06	1.72e-05	0.0046201	0.00512149	1.72067e-05	5.21514e-05
2	0.5	7	0.00124268	0.0166162	7.55e-06	1.91e-05	0.00469758	0.00525064	1.91371e-05	5.11372e-05
1.2	1	-5	0.000895827	0.0224343	7.97e-06	3.54e-05	0.00461548	0.00692497	3.53501e-05	4.25701e-05
1.3	1	-5	0.00087412	0.0227538	7.56e-06	3.59e-05	0.00469471	0.00700192	3.59023e-05	4.2237e-05
1.4	1	-5	0.000858003	0.023047	7.17e-06	3.64e-05	0.00477184	0.00707103	3.63806e-05	4.2001e-05
1.5	1	-5	0.00084047	0.0233326	6.77e-06	3.68e-05	0.00485218	0.00713666	3.68134e-05	4.17496e-05
1.6	1	-5	0.000823791	0.0236089	6.35e-06	3.72e-05	0.0049338	0.00719885	3.72063e-05	4.15152e-05
1.7	1	-5	0.000808671	0.0238733	5.94e-06	3.76e-05	0.00501584	0.00725711	3.75566e-05	4.13126e-05
1.8	1	-5	0.000794738	0.0241295	5.52e-06	3.79e-05	0.0050984	0.00731251	3.7875e-05	4.11305e-05
1.9	1	-5	0.00078047	0.024381	5.09e-06	3.82e-05	0.00518302	0.00736574	3.81637e-05	4.09487e-05
2	1	-5	0.000768785	0.0246225	4.67e-06	3.84e-05	0.00526626	0.00741616	3.84266e-05	4.08083e-05
1.2	1	-4	0.000952641	0.0217964	8.17e-06	3.36e-05	0.00457458	0.0067389	3.35906e-05	4.35604e-05
1.3	1	-4	0.000930225	0.0221408	7.79e-06	3.42e-05	0.00465095	0.00682492	3.42346e-05	4.31839e-05
1.4	1	-4	0.000909996	0.0224604	7.4e-06	3.48e-05	0.00472816	0.00690269	3.47949e-05	4.28529e-05
1.5	1	-4	0.00089324	0.0227558	7.01e-06	3.53e-05	0.00480468	0.00697287	3.52814e-05	4.25887e-05
1.6	1	-4	0.000876998	0.0230392	6.61e-06	3.57e-05	0.00488272	0.00703873	3.57197e-05	4.23387e-05
1.7	1	-4	0.000862004	0.0233115	6.21e-06	3.61e-05	0.00496144	0.00710077	3.61171e-05	4.21128e-05
1.8	1	-4	0.000846255	0.0235791	5.8e-06	3.65e-05	0.00504277	0.00716047	3.64823e-05	4.18801e-05
1.9	1	-4	0.000834369	0.0238311	5.4e-06	3.68e-05	0.00512158	0.00721587	3.68107e-05	4.17116e-05
2	1	-4	0.000821652	0.0240817	4.99e-06	3.71e-05	0.00520282	0.00727005	3.71186e-05	4.15316e-05
1.2	1	-3	0.00100444	0.0211396	8.36e-06	3.18e-05	0.00453728	0.00654547	3.1789e-05	4.45367e-05
1.3	1	-3	0.000981244	0.0215193	7.99e-06	3.25e-05	0.00461115	0.00664368	3.25484e-05	4.41214e-05
1.4	1	-3	0.000959703	0.0218688	7.61e-06	3.32e-05	0.00468641	0.00673174	3.3208e-05	4.37445e-05
1.5	1	-3	0.000938815	0.0221962	7.22e-06	3.38e-05	0.00476367	0.00681215	3.37884e-05	4.33907e-05
1.6	1	-3	0.000922778	0.0224931	6.84e-06	3.43e-05	0.00483877	0.0068834	3.42849e-05	4.31237e-05
1.7	1	-3	0.000905352	0.022784	6.44e-06	3.47e-05	0.00491722	0.00695168	3.47426e-05	4.28387e-05
1.8	1	-3	0.000891922	0.0230521	6.05e-06	3.51e-05	0.00499344	0.00701334	3.51405e-05	4.26275e-05
1.9	1	-3	0.000877061	0.0233189	5.65e-06	3.55e-05	0.00507291	0.00707353	3.55139e-05	4.23947e-05
2	1	-3	0.000866189	0.0235678	5.26e-06	3.58e-05	0.00514937	0.00712884	3.58466e-05	4.22288e-05
1.2	1	-2	0.00106102	0.0204074	8.57e-06	2.98e-05	0.00449655	0.00632898	2.98226e-05	4.5657e-05
1.3	1	-2	0.0010322	0.0208537	8.19e-06	3.08e-05	0.00457141	0.00644826	3.07638e-05	4.51099e-05
1.4	1	-2	0.0010073	0.0212501	7.81e-06	3.16e-05	0.00464643	0.0065515	3.15584e-05	4.46503e-05
1.5	1	-2	0.000984928	0.0216103	7.43e-06	3.22e-05	0.00472217	0.00664297	3.22419e-05	4.42495e-05
1.6	1	-2	0.000966808	0.0219349	7.05e-06	3.28e-05	0.0047965	0.00672345	3.28247e-05	4.39304e-05
1.7	1	-2	0.000949429	0.0222421	6.67e-06	3.33e-05	0.00487226	0.00679791	3.33461e-05	4.36308e-05
1.8	1	-2	0.00093345	0.0225327	6.28e-06	3.38e-05	0.00494859	0.00686686	3.38125e-05	4.33601e-05
1.9	1	-2	0.000918203	0.0228107	5.89e-06	3.42e-05	0.00502601	0.00693145	3.4233e-05	4.31085e-05
2	1	-2	0.000906578	0.0230683	5.51e-06	3.46e-05	0.00510091	0.00699024	3.46031e-05	4.29196e-05
1.2	1	-1	0.00111511	0.0196098	8.77e-06	2.77e-05	0.0044576	0.00609107	2.77132e-05	4.68282e-05
1.3	1	-1	0.00108158	0.0201398	8.38e-06	2.89e-05	0.00453289	0.00623698	2.88738e-05	4.6136e-05
1.4	1	-1	0.00105601	0.0205797	8.02e-06	2.98e-05	0.00460551	0.006355	2.97953e-05	4.56283e-05
1.5	1	-1	0.00103144	0.0209839	7.64e-06	3.06e-05	0.00468031	0.00646088	3.06049e-05	4.51587e-05
1.6	1	-1	0.00101127	0.0213426	7.27e-06	3.13e-05	0.00475382	0.00655265	3.12887e-05	4.47833e-05
1.7	1	-1	0.000991789	0.0216803	6.88e-06	3.19e-05	0.00482905	0.00663713	3.19012e-05	4.44297e-05
1.8	1	-1	0.000973512	0.0219977	6.5e-06	3.24e-05	0.00490533	0.0067148	3.24471e-05	4.4106e-05
1.9	1	-1	0.000957868	0.0222919	6.12e-06	3.29e-05	0.00498079	0.00678528	3.29265e-05	4.38336e-05
2	1	-1	0.000943383	0.0225718	5.73e-06	3.34e-05	0.00505674	0.00685102	3.33589e-05	4.35861e-05
1.2	1	0	0.0011641	0.0187195	8.94e-06	2.54e-05	0.00442233	0.00582277	2.54008e-05	4.80574e-05
1.3	1	0	0.00113142	0.0193349	8.58e-06	2.68e-05	0.00449401	0.00599699	2.67817e-05	4.72894e-05
1.4	1	0	0.00110329	0.0198517	8.22e-06	2.79e-05	0.0045658	0.00613977	2.79038e-05	4.66661e-05
1.5	1	0	0.00107863	0.0203012	7.85e-06	2.88e-05	0.00463783	0.00626106	2.88431e-05	4.6147e-05
1.6	1	0	0.00105415	0.0207166	7.47e-06	2.97e-05	0.00471265	0.00637057	2.96754e-05	4.56589e-05
1.7	1	0	0.00103357	0.0210861	7.1e-06	3.04e-05	0.00478644	0.00646578	3.03823e-05	4.526e-05
1.8	1	0	0.00101487	0.021427	6.72e-06	3.1e-05	0.00486066	0.00655168	3.10039e-05	4.49094e-05
1.9	1	0	0.000996153	0.0217537	6.34e-06	3.16e-05	0.00493715	0.00663233	3.1572e-05	4.45681e-05
2	1	0	0.000981114	0.0220503	5.96e-06	3.21e-05	0.00501146	0.00670403	3.20617e-05	4.42982e-05
1.2	1	1	0.0012162	0.0176294	9.13e-06	2.27e-05	0.00438482	0.00549198	2.26682e-05	4.95124e-05
1.3	1	1	0.0011792	0.0184002	8.77e-06	2.44e-05	0.00445675	0.00571555	2.44032e-05	4.85641e-05
1.4	1	1	0.00114868	0.0190271	8.41e-06	2.58e-05	0.00452767	0.00589361	2.57934e-05	4.78055e-05
1.5	1	1	0.00112126	0.0195636	8.05e-06	2.7e-05	0.00459946	0.00604265	2.6952e-05	4.71607e-05
1.6	1	1	0.00109639	0.0200332	7.68e-06	2.79e-05	0.0046721	0.00617014	2.79315e-05	4.66073e-05
1.7	1	1	0.00107509	0.0204441	7.31e-06	2.88e-05	0.00474409	0.00627913	2.87544e-05	4.61532e-05
1.8	1	1	0.00105279	0.0208361	6.93e-06	2.95e-05	0.00481971	0.00638096	2.9509e-05	4.57017e-05
1.9	1	1	0.00103412	0.0211852	6.56e-06	3.01e-05	0.00489386	0.00646961	3.01492e-05	4.53372e-05
2	1	1	0.00101985	0.021495	6.2e-06	3.07e-05	0.00496498	0.0065466	3.06907e-05	4.50615e-05
1.2	1	2	0.00127617	0.0162763	9.35e-06	1.95e-05	0.00434164	0.00507931	1.94604e-05	5.12136e-05
1.3	1	2	0.00122742	0.0173039	8.96e-06	2.17e-05	0.00441913	0.00538313	2.17157e-05	4.99598e-05
1.4	1	2	0.00119239	0.018074	8.6e-06	2.34e-05	0.00449095	0.00560659	2.34142e-05	4.90463e-05
1.5	1	2	0.0011624	0.0187185	8.23e-06	2.48e-05	0.00456244	0.00579005	2.48225e-05	4.82788e-05
1.6	1	2	0.00113965	0.0192414	7.89e-06	2.59e-05	0.00463057	0.00593588	2.59405e-05	4.77011e-05
1.7	1	2	0.00111511	0.0197333	7.52e-06	2.7e-05	0.00470326	0.00607042	2.6966e-05	4.71215e-05
1.8	1	2	0.00109467	0.020157	7.16e-06	2.78e-05	0.00477448	0.00618372	2.78169e-05	4.66568e-05
1.9	1	2	0.00107237	0.020566	6.78e-06	2.86e-05	0.00485026	0.00629091	2.86096e-05	4.61802e-05
2	1	2	0.00105414	0.020925	6.4e-06	2.93e-05	0.00492384	0.00638287	2.92738e-05	4.58025e-05
1.2	1	3	0.00134399	0.0143087	9.6e-06	1.52e-05	0.00429281	0.00457601	1.51622e-05	5.34256e-05
1.3	1	3	0.00128813	0.0158794	9.2e-06	1.84e-05	0.00437178	0.00494942	1.84309e-05	5.17056e-05
1.4	1	3	0.00124434	0.0169002	8.82e-06	2.06e-05	0.00444731	0.0052516	2.06185e-05	5.0533e-05
1.5	1	3	0.00120925	0.017689	8.45e-06	2.23e-05	0.00452028	0.00548076	2.23201e-05	4.96187e-05
1.6	1	3	0.00117647	0.0183836	8.07e-06	2.38e-05	0.00459522	0.00567912	2.38151e-05	4.87778e-05
1.7	1	3	0.00115379	0.0189242	7.72e-06	2.5e-05	0.00466381	0.00583046	2.4958e-05	4.81849e-05
1.8	1	3	0.00113004	0.0194318	7.35e-06	2.6e-05	0.00473628	0.00597004	2.601e-05	4.75976e-05
1.9	1	3	0.00110934	0.0198782	6.99e-06	2.69e-05	0.00480811	0.00609034	2.6908e-05	4.70993e-05
2	1	3	0.00109249	0.0202648	6.64e-06	2.77e-05	0.00487782	0.00619227	2.76564e-05	4.67054e-05
1.4	1	4	0.00130011	0.0153941	9.05e-06	1.72e-05	0.00440047	0.00479259	1.72396e-05	5.22684e-05
1.5	1	4	0.00125678	0.0165155	8.66e-06	1.96e-05	0.0044775	0.00512587	1.95933e-05	5.10179e-05
1.6	1	4	0.00122106	0.0173427	8.29e-06	2.13e-05	0.00455242	0.00536662	2.13426e-05	5.00742e-05
1.7	1	4	0.0011943	0.0179892	7.93e-06	2.27e-05	0.00462249	0.00555135	2.27038e-05	4.93664e-05
1.8	1	4	0.00116918	0.01857	7.57e-06	2.39e-05	0.004694	0.00571461	2.39159e-05	4.87127e-05
1.9	1	4	0.00114514	0.0191025	7.2e-06	2.5e-05	0.0047673	0.00586184	2.50113e-05	4.81003e-05
2	1	4	0.00112468	0.0195666	6.83e-06	2.59e-05	0.00483918	0.00598773	2.59422e-05	4.75874e-05
1.5	1	5	0.00131308	0.0147542	8.92e-06	1.58e-05	0.00442683	0.00479938	1.57676e-05	5.29673e-05
1.6	1	5	0.00127443	0.015981	8.54e-06	1.83e-05	0.00450119	0.00495531	1.82747e-05	5.16904e-05
1.7	1	5	0.00123886	0.0168942	8.16e-06	2.02e-05	0.00457705	0.00522275	2.0172e-05	5.06806e-05
1.8	1	5	0.00120733	0.0176267	7.78e-06	2.17e-05	0.0046528	0.00543304	2.16915e-05	4.98495e-05
1.9	1	5	0.00118454	0.0181974	7.42e-06	2.29e-05	0.00472238	0.00559379	2.28613e-05	4.92446e-05
2	1	5	0.00116074	0.0187446	7.05e-06	2.4e-05	0.00479591	0.00574569	2.3973e-05	4.86288e-05
1.7	1	6	0.00128705	0.0153939	8.41e-06	1.69e-05	0.00452789	0.00496781	1.68829e-05	5.23407e-05
1.8	1	6	0.00125744	0.0163512	8.05e-06	1.88e-05	0.00459868	0.00508581	1.883e-05	5.13683e-05
1.9	1	6	0.00122558	0.0171683	7.66e-06	2.05e-05	0.0046756	0.00528705	2.05024e-05	5.04666e-05
2	1	6	0.00119758	0.017832	7.28e-06	2.18e-05	0.0047517	0.00547527	2.18495e-05	4.97264e-05
1.9	1	7	0.00127042	0.0157633	7.92e-06	1.74e-05	0.00462448	0.00512881	1.74273e-05	5.20229e-05
2	1	7	0.00123876	0.016702	7.53e-06	1.93e-05	0.00470229	0.00525848	1.93207e-05	5.10224e-05
1.2	1.5	-5	0.000891483	0.0224782	7.95e-06	3.55e-05	0.00461861	0.00693768	3.54708e-05	4.24985e-05
1.3	1.5	-5	0.000872175	0.0227909	7.56e-06	3.6e-05	0.00469622	0.00701294	3.60108e-05	4.22064e-05
1.4	1.5	-5	0.000853059	0.0230909	7.15e-06	3.65e-05	0.00477599	0.00708338	3.64952e-05	4.19231e-05
1.5	1.5	-5	0.000835255	0.0233766	6.74e-06	3.69e-05	0.00485687	0.00714883	3.69247e-05	4.16692e-05
1.6	1.5	-5	0.000818329	0.0236515	6.33e-06	3.73e-05	0.00493904	0.00721042	3.73098e-05	4.14363e-05
1.7	1.5	-5	0.000803459	0.0239153	5.91e-06	3.77e-05	0.00502115	0.00726842	3.76573e-05	4.12386e-05
1.8	1.5	-5	0.000790281	0.0241687	5.5e-06	3.8e-05	0.00510322	0.00732308	3.79696e-05	4.10708e-05
1.9	1.5	-5	0.000775823	0.0244209	5.07e-06	3.83e-05	0.00518832	0.00737636	3.82573e-05	4.08859e-05
2	1.5	-5	0.000763972	0.0246615	4.64e-06	3.85e-05	0.00527203	0.00742635	3.85142e-05	4.07462e-05
1.2	1.5	-4	0.000949955	0.0218314	8.16e-06	3.37e-05	0.00457651	0.00674921	3.3688e-05	4.35098e-05
1.3	1.5	-4	0.000927312	0.0221744	7.77e-06	3.43e-05	0.00465322	0.00683466	3.43259e-05	4.31331e-05
1.4	1.5	-4	0.00090688	0.0224932	7.38e-06	3.49e-05	0.00473078	0.00691206	3.48819e-05	4.28007e-05
1.5	1.5	-4	0.000889943	0.0227883	6.99e-06	3.54e-05	0.00480765	0.00698205	3.53656e-05	4.25349e-05
1.6	1.5	-4	0.000873535	0.023072	6.6e-06	3.58e-05	0.00488605	0.00704787	3.58027e-05	4.22823e-05
1.7	1.5	-4	0.000858387	0.0233443	6.2e-06	3.62e-05	0.00496512	0.00710978	3.61978e-05	4.20551e-05
1.8	1.5	-4	0.000845109	0.023605	5.8e-06	3.66e-05	0.005044	0.007168	3.65554e-05	4.18617e-05
1.9	1.5	-4	0.00083047	0.0238641	5.38e-06	3.69e-05	0.00512602	0.0072247	3.68874e-05	4.16517e-05
2	1.5	-4	0.000817628	0.0241145	4.97e-06	3.72e-05	0.00520765	0.00727865	3.71918e-05	4.14722e-05
1.2	1.5	-3	0.00100347	0.021166	8.36e-06	3.19e-05	0.00453798	0.00655347	3.18649e-05	4.45141e-05
1.3	1.5	-3	0.000977842	0.0215536	7.97e-06	3.26e-05	0.0046138	0.00665356	3.26381e-05	4.40577e-05
1.4	1.5	-3	0.000958442	0.0218932	7.6e-06	3.33e-05	0.00468747	0.00673899	3.32766e-05	4.37204e-05
1.5	1.5	-3	0.00093742	0.0222204	7.21e-06	3.39e-05	0.00476492	0.00681923	3.38551e-05	4.33644e-05
1.6	1.5	-3	0.000918902	0.0225253	6.82e-06	3.44e-05	0.00484249	0.00689228	3.43628e-05	4.30555e-05
1.7	1.5	-3	0.000903736	0.0228072	6.43e-06	3.48e-05	0.00491887	0.00695832	3.48043e-05	4.2811e-05
1.8	1.5	-3	0.00089021	0.0230755	6.04e-06	3.52e-05	0.00499529	0.00701996	3.52015e-05	4.2598e-05
1.9	1.5	-3	0.000875255	0.0233425	5.64e-06	3.56e-05	0.00507497	0.00708013	3.55742e-05	4.23637e-05
2	1.5	-3	0.000864305	0.023591	5.25e-06	3.59e-05	0.00515163	0.00713528	3.59047e-05	4.21983e-05
1.2	1.5	-2	0.0010579	0.0204423	8.56e-06	2.99e-05	0.00449879	0.00633925	2.99139e-05	4.55957e-05
1.3	1.5	-2	0.00103068	0.0208794	8.18e-06	3.08e-05	0.00457259	0.00645589	3.08336e-05	4.50784e-05
1.4	1.5	-2	0.00100566	0.0212747	7.8e-06	3.16e-05	0.00464781	0.00655873	3.16245e-05	4.46182e-05
1.5	1.5	-2	0.000983171	0.0216345	7.42e-06	3.23e-05	0.00472375	0.00664998	3.23057e-05	4.42159e-05
1.6	1.5	-2	0.000964952	0.0219586	7.04e-06	3.29e-05	0.00479829	0.00673024	3.28862e-05	4.38953e-05
1.7	1.5	-2	0.00094748	0.0222652	6.66e-06	3.34e-05	0.00487425	0.00680448	3.34051e-05	4.35953e-05
1.8	1.5	-2	0.000931414	0.022555	6.27e-06	3.39e-05	0.00495079	0.00687311	3.38679e-05	4.33251e-05
1.9	1.5	-2	0.000916088	0.0228334	5.88e-06	3.43e-05	0.00502842	0.00693771	3.42881e-05	4.30713e-05
2	1.5	-2	0.000904395	0.0230908	5.49e-06	3.47e-05	0.00510353	0.0069964	3.46567e-05	4.28816e-05
1.2	1.5	-1	0.00111185	0.019648	8.75e-06	2.78e-05	0.00445995	0.00610238	2.78107e-05	4.67593e-05
1.3	1.5	-1	0.00108099	0.0201598	8.38e-06	2.89e-05	0.00453335	0.00624308	2.89292e-05	4.61204e-05
1.4	1.5	-1	0.00105245	0.0206141	8e-06	2.99e-05	0.0046085	0.00636488	2.98806e-05	4.55597e-05
1.5	1.5	-1	0.00103067	0.0210032	7.63e-06	3.07e-05	0.004681	0.00646665	3.06579e-05	4.51397e-05
1.6	1.5	-1	0.00100921	0.0213672	7.26e-06	3.14e-05	0.0047558	0.00655969	3.13509e-05	4.47426e-05
1.7	1.5	-1	0.000989648	0.0217036	6.87e-06	3.2e-05	0.00483124	0.00664372	3.19588e-05	4.43907e-05
1.8	1.5	-1	0.000973411	0.0220112	6.5e-06	3.25e-05	0.00490544	0.0067189	3.24864e-05	4.41019e-05
1.9	1.5	-1	0.000955576	0.0223145	6.1e-06	3.3e-05	0.0049834	0.00679149	3.29797e-05	4.37936e-05
2	1.5	-1	0.000941027	0.0225942	5.72e-06	3.34e-05	0.00505957	0.0068571	3.34104e-05	4.3545e-05
1.2	1.5	0	0.00116341	0.0187439	8.94e-06	2.55e-05	0.00442283	0.00583025	2.5465e-05	4.80334e-05
1.3	1.5	0	0.00112795	0.0193761	8.57e-06	2.69e-05	0.00449672	0.00600911	2.68839e-05	4.72115e-05
1.4	1.5	0	0.00109969	0.0198895	8.2e-06	2.8e-05	0.00456882	0.00615073	2.79964e-05	4.65915e-05
1.5	1.5	0	0.00107492	0.0203372	7.84e-06	2.89e-05	0.00464117	0.00627134	2.89298e-05	4.60729e-05
1.6	1.5	0	0.00105313	0.0207354	7.47e-06	2.97e-05	0.00471364	0.00637614	2.97248e-05	4.56362e-05
1.7	1.5	0	0.00103248	0.0211041	7.09e-06	3.04e-05	0.00478755	0.00647102	3.04288e-05	4.52384e-05
1.8	1.5	0	0.00101372	0.0214451	6.72e-06	3.11e-05	0.0048619	0.00655693	3.10504e-05	4.48856e-05
1.9	1.5	0	0.000995788	0.0217673	6.34e-06	3.16e-05	0.00493756	0.00663638	3.16095e-05	4.45583e-05
2	1.5	0	0.000980709	0.0220638	5.96e-06	3.21e-05	0.00501195	0.00670802	3.20986e-05	4.42878e-05
1.2	1.5	1	0.00121284	0.0176821	9.12e-06	2.28e-05	0.00438723	0.00550785	2.27948e-05	4.94266e-05
1.3	1.5	1	0.0011757	0.0184487	8.76e-06	2.45e-05	0.00445947	0.00573001	2.45212e-05	4.84783e-05
1.4	1.5	1	0.00114508	0.0190713	8.4e-06	2.59e-05	0.00453069	0.0059066	2.59006e-05	4.77227e-05
1.5	1.5	1	0.00111755	0.0196046	8.03e-06	2.71e-05	0.0046028	0.00605451	2.70504e-05	4.70798e-05
1.6	1.5	1	0.00109524	0.0200538	7.67e-06	2.8e-05	0.00467321	0.00617623	2.79841e-05	4.65797e-05
1.7	1.5	1	0.0010712	0.0204808	7.29e-06	2.88e-05	0.00474806	0.00628947	2.88396e-05	4.60749e-05
1.8	1.5	1	0.00105423	0.0208386	6.94e-06	2.95e-05	0.00481815	0.00638213	2.95236e-05	4.57244e-05
1.9	1.5	1	0.00103554	0.0211877	6.56e-06	3.02e-05	0.00489224	0.00647075	3.01639e-05	4.53593e-05
2	1.5	1	0.00101574	0.0215289	6.17e-06	3.08e-05	0.00496991	0.0065557	3.07636e-05	4.49849e-05
1.2	1.5	2	0.00127198	0.0163464	9.34e-06	1.96e-05	0.00434466	0.00510058	1.96187e-05	5.11083e-05
1.3	1.5	2	0.00122883	0.0173062	8.97e-06	2.17e-05	0.00441803	0.0053841	2.17255e-05	4.99825e-05
1.4	1.5	2	0.00119375	0.0180764	8.6e-06	2.34e-05	0.00448981	0.00560757	2.34247e-05	4.90682e-05
1.5	1.5	2	0.00116373	0.0187207	8.24e-06	2.48e-05	0.00456124	0.00579103	2.48334e-05	4.82999e-05
1.6	1.5	2	0.00113588	0.019286	7.87e-06	2.6e-05	0.00463419	0.00594881	2.60458e-05	4.76152e-05
1.7	1.5	2	0.00111126	0.0197752	7.5e-06	2.71e-05	0.00470719	0.00608239	2.70636e-05	4.70373e-05
1.8	1.5	2	0.00109074	0.020197	7.14e-06	2.79e-05	0.00477872	0.00619497	2.79084e-05	4.65732e-05
1.9	1.5	2	0.0010736	0.020568	6.78e-06	2.86e-05	0.00484886	0.00629187	2.86216e-05	4.61995e-05
2	1.5	2	0.00105534	0.0209269	6.41e-06	2.93e-05	0.00492239	0.0063838	2.92858e-05	4.58214e-05
1.2	1.5	3	0.00133987	0.014421	9.58e-06	1.54e-05	0.00429577	0.00458095	1.53934e-05	5.32906e-05
1.3	1.5	3	0.00128387	0.0159579	9.18e-06	1.86e-05	0.0043751	0.0049732	1.86032e-05	5.15913e-05
1.4	1.5	3	0.00124555	0.016902	8.82e-06	2.06e-05	0.0044463	0.00525239	2.06265e-05	5.05526e-05
1.5	1.5	3	0.00120575	0.0177408	8.43e-06	2.24e-05	0.00452343	0.00549613	2.24395e-05	4.95326e-05
1.6	1.5	3	0.00117762	0.0183853	8.07e-06	2.38e-05	0.00459413	0.00567991	2.38239e-05	4.87959e-05
1.7	1.5	3	0.00114999	0.0189725	7.7e-06	2.51e-05	0.00466769	0.00584444	2.50698e-05	4.80945e-05
1.8	1.5	3	0.00113114	0.0194335	7.36e-06	2.6e-05	0.00473509	0.00597083	2.60195e-05	4.76149e-05
1.9	1.5	3	0.00111042	0.0198798	7e-06	2.69e-05	0.00480689	0.00609111	2.69176e-05	4.71162e-05
2	1.5	3	0.00108849	0.0203061	6.61e-06	2.77e-05	0.00488261	0.00620378	2.77483e-05	4.662e-05
1.4	1.5	4	0.0013012	0.0153955	9.06e-06	1.72e-05	0.00439956	0.00479321	1.72454e-05	5.22862e-05
1.5	1.5	4	0.00125783	0.016517	8.67e-06	1.96e-05	0.00447656	0.00512653	1.95999e-05	5.1035e-05
1.6	1.5	4	0.00122208	0.0173441	8.29e-06	2.13e-05	0.00455145	0.00536727	2.13495e-05	5.00906e-05
1.7	1.5	4	0.0011953	0.0179907	7.94e-06	2.27e-05	0.00462148	0.00555202	2.27112e-05	4.93823e-05
1.8	1.5	4	0.00116537	0.0186205	7.55e-06	2.4e-05	0.00469812	0.00572923	2.40302e-05	4.86231e-05
1.9	1.5	4	0.0011461	0.0191038	7.2e-06	2.5e-05	0.00476621	0.0058625	2.50192e-05	4.81153e-05
2	1.5	4	0.00112562	0.0195678	6.84e-06	2.6e-05	0.00483805	0.00598838	2.59502e-05	4.76022e-05
1.5	1.5	5	0.00131403	0.0147553	8.93e-06	1.58e-05	0.00442597	0.00479795	1.57723e-05	5.29829e-05
1.6	1.5	5	0.00127535	0.0159822	8.55e-06	1.83e-05	0.0045003	0.00495584	1.828e-05	5.17055e-05
1.7	1.5	5	0.00123975	0.0168954	8.17e-06	2.02e-05	0.00457613	0.00522332	2.01779e-05	5.06953e-05
1.8	1.5	5	0.00120821	0.0176279	7.78e-06	2.17e-05	0.00465186	0.00543361	2.16977e-05	4.98635e-05
1.9	1.5	5	0.0011854	0.0181985	7.43e-06	2.29e-05	0.0047214	0.00559435	2.28677e-05	4.92584e-05
2	1.5	5	0.00116158	0.0187457	7.06e-06	2.4e-05	0.0047949	0.00574625	2.39797e-05	4.86423e-05
1.7	1.5	6	0.00128787	0.0153949	8.41e-06	1.69e-05	0.00452705	0.00496642	1.68873e-05	5.23541e-05
1.8	1.5	6	0.00125298	0.0164359	8.03e-06	1.9e-05	0.0046035	0.00509383	1.90107e-05	5.12449e-05
1.9	1.5	6	0.00122636	0.0171692	7.67e-06	2.05e-05	0.00467471	0.00528751	2.05075e-05	5.04791e-05
2	1.5	6	0.00119834	0.0178329	7.28e-06	2.19e-05	0.00475079	0.00547574	2.18549e-05	4.97385e-05
1.9	1.5	7	0.00127113	0.015764	7.92e-06	1.74e-05	0.00462367	0.00512745	1.74311e-05	5.20344e-05
2	1.5	7	0.00123945	0.0167027	7.53e-06	1.93e-05	0.00470146	0.00525709	1.93249e-05	5.10335e-05
1.2	2	-5	0.000890043	0.0224885	7.94e-06	3.55e-05	0.00461965	0.00694058	3.54973e-05	4.24743e-05
1.3	2	-5	0.000870664	0.0228011	7.55e-06	3.6e-05	0.0046974	0.00701574	3.60361e-05	4.21815e-05
1.4	2	-5	0.000851483	0.0231003	7.15e-06	3.65e-05	0.00477731	0.00708588	3.6517e-05	4.19e-05
1.5	2	-5	0.000833618	0.0233857	6.74e-06	3.69e-05	0.00485834	0.00715124	3.69451e-05	4.1646e-05
1.6	2	-5	0.000819475	0.0236548	6.33e-06	3.73e-05	0.00493794	0.00721172	3.73267e-05	4.1455e-05
1.7	2	-5	0.000804585	0.0239185	5.92e-06	3.77e-05	0.00502	0.00726971	3.76743e-05	4.12572e-05
1.8	2	-5	0.000789697	0.0241757	5.49e-06	3.8e-05	0.00510385	0.00732502	3.79878e-05	4.10634e-05
1.9	2	-5	0.000776909	0.024424	5.07e-06	3.83e-05	0.00518708	0.00737763	3.82743e-05	4.09041e-05
2	2	-5	0.000765042	0.0246645	4.65e-06	3.85e-05	0.00527075	0.00742761	3.85313e-05	4.07643e-05
1.2	2	-4	0.000948418	0.021841	8.16e-06	3.37e-05	0.00457762	0.00675187	3.37115e-05	4.34841e-05
1.3	2	-4	0.00092819	0.0221767	7.78e-06	3.43e-05	0.00465253	0.00683556	3.43369e-05	4.3147e-05
1.4	2	-4	0.000907739	0.0224955	7.39e-06	3.49e-05	0.00473006	0.00691296	3.48931e-05	4.28145e-05
1.5	2	-4	0.000890786	0.0227905	7e-06	3.54e-05	0.00480689	0.00698292	3.53767e-05	4.25483e-05
1.6	2	-4	0.000874363	0.0230742	6.6e-06	3.58e-05	0.00488525	0.00704875	3.5814e-05	4.22956e-05
1.7	2	-4	0.000856598	0.0233537	6.19e-06	3.62e-05	0.00496695	0.00711217	3.62167e-05	4.20265e-05
1.8	2	-4	0.000843282	0.0236141	5.79e-06	3.66e-05	0.00504598	0.00717023	3.65722e-05	4.18341e-05
1.9	2	-4	0.000831257	0.0238661	5.39e-06	3.69e-05	0.00512513	0.00722554	3.68987e-05	4.16645e-05
2	2	-4	0.000818402	0.0241164	4.97e-06	3.72e-05	0.00520672	0.00727948	3.72031e-05	4.14848e-05
1.2	2	-3	0.00100416	0.0211677	8.36e-06	3.19e-05	0.00453748	0.00655413	3.18727e-05	4.4525e-05
1.3	2	-3	0.00097851	0.0215553	7.98e-06	3.26e-05	0.00461328	0.00665421	3.26459e-05	4.40681e-05
1.4	2	-3	0.000956781	0.021903	7.59e-06	3.33e-05	0.00468886	0.00674164	3.32989e-05	4.36917e-05
1.5	2	-3	0.00093806	0.0222219	7.21e-06	3.39e-05	0.00476435	0.00681986	3.3863e-05	4.33746e-05
1.6	2	-3	0.00091953	0.0225268	6.82e-06	3.44e-05	0.00484189	0.0068929	3.43707e-05	4.30655e-05
1.7	2	-3	0.000904353	0.0228087	6.43e-06	3.48e-05	0.00491824	0.00695894	3.48123e-05	4.28208e-05
1.8	2	-3	0.000888397	0.0230849	6.03e-06	3.52e-05	0.00499725	0.00702231	3.52194e-05	4.2568e-05
1.9	2	-3	0.000875853	0.0233438	5.64e-06	3.56e-05	0.00507429	0.00708073	3.55822e-05	4.23732e-05
2	2	-3	0.000862433	0.0236002	5.24e-06	3.59e-05	0.00515388	0.00713746	3.59201e-05	4.21688e-05
1.2	2	-2	0.00105845	0.0204436	8.56e-06	2.99e-05	0.0044984	0.00633975	2.99196e-05	4.56044e-05
1.3	2	-2	0.00103121	0.0208806	8.19e-06	3.08e-05	0.00457217	0.00645637	3.08393e-05	4.50868e-05
1.4	2	-2	0.00100617	0.0212759	7.8e-06	3.16e-05	0.00464737	0.00655921	3.16303e-05	4.46263e-05
1.5	2	-2	0.000983678	0.0216356	7.42e-06	3.23e-05	0.00472329	0.00665045	3.23115e-05	4.42238e-05
1.6	2	-2	0.000963238	0.0219689	7.03e-06	3.29e-05	0.00479993	0.00673298	3.29085e-05	4.38647e-05
1.7	2	-2	0.000945734	0.0222754	6.65e-06	3.34e-05	0.00487603	0.00680712	3.34261e-05	4.35644e-05
1.8	2	-2	0.000931894	0.0225561	6.27e-06	3.39e-05	0.00495027	0.00687357	3.38739e-05	4.33327e-05
1.9	2	-2	0.00091656	0.0228344	5.88e-06	3.43e-05	0.00502788	0.00693817	3.42941e-05	4.30788e-05
2	2	-2	0.000904861	0.0230918	5.5e-06	3.47e-05	0.00510297	0.00699684	3.46626e-05	4.2889e-05
1.2	2	-1	0.0011123	0.019649	8.76e-06	2.78e-05	0.00445962	0.00610276	2.78149e-05	4.67664e-05
1.3	2	-1	0.00107859	0.0201763	8.37e-06	2.9e-05	0.00453522	0.00624771	2.89676e-05	4.60752e-05
1.4	2	-1	0.00105288	0.020615	8e-06	2.99e-05	0.00460814	0.00636524	2.98849e-05	4.55663e-05
1.5	2	-1	0.00103108	0.0210041	7.64e-06	3.07e-05	0.00468063	0.00646702	3.06623e-05	4.51462e-05
1.6	2	-1	0.00100962	0.021368	7.26e-06	3.14e-05	0.00475541	0.00656005	3.13553e-05	4.47489e-05
1.7	2	-1	0.000990047	0.0217045	6.88e-06	3.2e-05	0.00483083	0.00664408	3.19633e-05	4.4397e-05
1.8	2	-1	0.000973803	0.0220121	6.5e-06	3.25e-05	0.00490501	0.00671926	3.2491e-05	4.41082e-05
1.9	2	-1	0.000955961	0.0223152	6.11e-06	3.3e-05	0.00498296	0.00679182	3.29841e-05	4.37995e-05
2	2	-1	0.000941406	0.022595	5.72e-06	3.34e-05	0.00505911	0.00685744	3.3415e-05	4.3551e-05
1.2	2	0	0.00116378	0.0187447	8.94e-06	2.55e-05	0.00442256	0.00583055	2.54682e-05	4.80394e-05
1.3	2	0	0.00112831	0.0193768	8.57e-06	2.69e-05	0.00449644	0.00600939	2.68871e-05	4.72173e-05
1.4	2	0	0.00110005	0.0198902	8.2e-06	2.8e-05	0.00456852	0.00615104	2.79999e-05	4.65972e-05
1.5	2	0	0.00107527	0.0203379	7.84e-06	2.89e-05	0.00464086	0.00627164	2.89333e-05	4.60785e-05
1.6	2	0	0.00105347	0.0207361	7.47e-06	2.97e-05	0.00471331	0.00637642	2.97283e-05	4.56417e-05
1.7	2	0	0.00103	0.0211203	7.08e-06	3.05e-05	0.00479008	0.00647535	3.04631e-05	4.51922e-05
1.8	2	0	0.0010112	0.0214604	6.7e-06	3.11e-05	0.00486462	0.00656091	3.10811e-05	4.48413e-05
1.9	2	0	0.000994084	0.021778	6.33e-06	3.16e-05	0.0049395	0.00663916	3.16309e-05	4.45288e-05
2	2	0	0.000981026	0.0220644	5.96e-06	3.21e-05	0.00501157	0.0067083	3.21023e-05	4.42928e-05
1.2	2	1	0.00121317	0.0176827	9.12e-06	2.28e-05	0.004387	0.00550809	2.27972e-05	4.94318e-05
1.3	2	1	0.00117602	0.0184493	8.76e-06	2.45e-05	0.00445923	0.00573023	2.45236e-05	4.84831e-05
1.4	2	1	0.00114538	0.0190718	8.4e-06	2.59e-05	0.00453044	0.00590683	2.59032e-05	4.77275e-05
1.5	2	1	0.00111785	0.0196051	8.03e-06	2.71e-05	0.00460253	0.00605475	2.70531e-05	4.70846e-05
1.6	2	1	0.00109553	0.0200543	7.68e-06	2.8e-05	0.00467293	0.00617645	2.79868e-05	4.65841e-05
1.7	2	1	0.00107149	0.0204813	7.3e-06	2.88e-05	0.00474776	0.00628969	2.88424e-05	4.60794e-05
1.8	2	1	0.00105451	0.0208391	6.94e-06	2.95e-05	0.00481785	0.00638235	2.95264e-05	4.57287e-05
1.9	2	1	0.00103582	0.0211882	6.57e-06	3.02e-05	0.00489193	0.00647098	3.01668e-05	4.53637e-05
2	2	1	0.00101601	0.0215294	6.17e-06	3.08e-05	0.00496959	0.00655592	3.07665e-05	4.49891e-05
1.2	2	2	0.00127226	0.0163469	9.34e-06	1.96e-05	0.00434445	0.00510077	1.96205e-05	5.11128e-05
1.3	2	2	0.0012291	0.0173067	8.97e-06	2.17e-05	0.00441782	0.00538429	2.17275e-05	4.9987e-05
1.4	2	2	0.00119402	0.0180768	8.6e-06	2.34e-05	0.00448959	0.00560776	2.34267e-05	4.90724e-05
1.5	2	2	0.00116399	0.0187212	8.24e-06	2.48e-05	0.00456101	0.00579122	2.48355e-05	4.8304e-05
1.6	2	2	0.00113613	0.0192864	7.87e-06	2.6e-05	0.00463395	0.00594899	2.60479e-05	4.76192e-05
1.7	2	2	0.00111151	0.0197756	7.5e-06	2.71e-05	0.00470694	0.00608256	2.70657e-05	4.7041e-05
1.8	2	2	0.00109098	0.0201974	7.14e-06	2.79e-05	0.00477846	0.00619516	2.79107e-05	4.6577e-05
1.9	2	2	0.00107383	0.0205684	6.79e-06	2.86e-05	0.00484859	0.00629204	2.86238e-05	4.62031e-05
2	2	2	0.00105558	0.0209273	6.41e-06	2.93e-05	0.00492211	0.00638399	2.92882e-05	4.58251e-05
1.2	2	3	0.00134012	0.0144213	9.59e-06	1.54e-05	0.00429559	0.00458065	1.53946e-05	5.32948e-05
1.3	2	3	0.00128411	0.0159582	9.18e-06	1.86e-05	0.00437491	0.00497335	1.86046e-05	5.15952e-05
1.4	2	3	0.0012402	0.0169672	8.8e-06	2.08e-05	0.00445079	0.00527169	2.07705e-05	5.04293e-05
1.5	2	3	0.00120597	0.0177412	8.43e-06	2.24e-05	0.00452322	0.00549628	2.24411e-05	4.95362e-05
1.6	2	3	0.00117784	0.0183857	8.08e-06	2.38e-05	0.00459392	0.00568007	2.38257e-05	4.87996e-05
1.7	2	3	0.00115021	0.0189728	7.7e-06	2.51e-05	0.00466747	0.0058446	2.50716e-05	4.80979e-05
1.8	2	3	0.00113135	0.0194338	7.36e-06	2.6e-05	0.00473486	0.00597098	2.60213e-05	4.76183e-05
1.9	2	3	0.00111062	0.0198802	7e-06	2.69e-05	0.00480665	0.00609127	2.69195e-05	4.71196e-05
2	2	3	0.0010887	0.0203064	6.61e-06	2.78e-05	0.00488236	0.00620393	2.77502e-05	4.66232e-05
1.4	2	4	0.00130141	0.0153958	9.06e-06	1.72e-05	0.00439938	0.00479334	1.72466e-05	5.22897e-05
1.5	2	4	0.00125803	0.0165172	8.67e-06	1.96e-05	0.00447637	0.00512664	1.96011e-05	5.10382e-05
1.6	2	4	0.00122228	0.0173444	8.29e-06	2.14e-05	0.00455126	0.00536741	2.13509e-05	5.00938e-05
1.7	2	4	0.0011927	0.0180213	7.92e-06	2.28e-05	0.00462412	0.0055609	2.27789e-05	4.93226e-05
1.8	2	4	0.00116556	0.0186208	7.55e-06	2.4e-05	0.00469791	0.00572936	2.40317e-05	4.86261e-05
1.9	2	4	0.00114628	0.0191041	7.2e-06	2.5e-05	0.004766	0.00586264	2.50208e-05	4.81184e-05
2	2	4	0.0011258	0.0195681	6.84e-06	2.6e-05	0.00483784	0.00598851	2.59518e-05	4.76051e-05
1.5	2	5	0.00131422	0.0147555	8.93e-06	1.58e-05	0.00442581	0.00479768	1.57732e-05	5.2986e-05
1.6	2	5	0.00127553	0.0159824	8.55e-06	1.83e-05	0.00450013	0.00495594	1.8281e-05	5.17084e-05
1.7	2	5	0.00123993	0.0168956	8.17e-06	2.02e-05	0.00457595	0.00522342	2.0179e-05	5.0698e-05
1.8	2	5	0.00120838	0.0176281	7.78e-06	2.17e-05	0.00465168	0.00543371	2.16989e-05	4.98662e-05
1.9	2	5	0.00118283	0.0182296	7.41e-06	2.29e-05	0.00472433	0.00560326	2.2935e-05	4.91985e-05
2	2	5	0.00116174	0.0187459	7.06e-06	2.4e-05	0.00479471	0.00574635	2.39809e-05	4.86449e-05
1.7	2	6	0.00128803	0.015395	8.41e-06	1.69e-05	0.00452689	0.00496615	1.68881e-05	5.23567e-05
1.8	2	6	0.00125314	0.0164361	8.03e-06	1.9e-05	0.00460333	0.00509355	1.90117e-05	5.12475e-05
1.9	2	6	0.00122651	0.0171694	7.67e-06	2.05e-05	0.00467454	0.0052876	2.05085e-05	5.04816e-05
2	2	6	0.00119849	0.0178331	7.28e-06	2.19e-05	0.00475061	0.00547582	2.18559e-05	4.97408e-05
1.9	2	7	0.00127127	0.0157642	7.93e-06	1.74e-05	0.00462351	0.00512719	1.74319e-05	5.20367e-05
2	2	7	0.00123959	0.0167029	7.53e-06	1.93e-05	0.00470129	0.00525682	1.93258e-05	5.10359e-05
1.2	2.5	-5	0.000894157	0.0224577	7.96e-06	3.54e-05	0.00461669	0.00693188	3.54172e-05	4.25423e-05
1.3	2.5	-5	0.000872274	0.0227774	7.56e-06	3.6e-05	0.00469615	0.0070088	3.59686e-05	4.22063e-05
1.4	2.5	-5	0.000853255	0.0230765	7.15e-06	3.65e-05	0.00477583	0.007079	3.64506e-05	4.19268e-05
1.5	2.5	-5	0.000838336	0.0233556	6.76e-06	3.69e-05	0.0048541	0.00714317	3.68747e-05	4.17179e-05
1.6	2.5	-5	0.000821524	0.0236312	6.34e-06	3.73e-05	0.00493598	0.00720507	3.72639e-05	4.14838e-05
1.7	2.5	-5	0.000806044	0.0238967	5.93e-06	3.76e-05	0.00501852	0.0072635	3.76145e-05	4.12757e-05
1.8	2.5	-5	0.000791273	0.0241542	5.5e-06	3.79e-05	0.00510214	0.00731898	3.79304e-05	4.10825e-05
1.9	2.5	-5	0.000778585	0.024402	5.08e-06	3.82e-05	0.00518517	0.00737148	3.82165e-05	4.09253e-05
2	2.5	-5	0.000765099	0.0246472	4.65e-06	3.85e-05	0.00527068	0.00742241	3.84776e-05	4.07589e-05
1.2	2.5	-4	0.000950448	0.0218185	8.17e-06	3.37e-05	0.00457616	0.0067453	3.365e-05	4.35209e-05
1.3	2.5	-4	0.00092789	0.0221621	7.78e-06	3.43e-05	0.00465277	0.00683099	3.42903e-05	4.3144e-05
1.4	2.5	-4	0.000907535	0.0224811	7.39e-06	3.48e-05	0.00473023	0.00690848	3.48474e-05	4.28126e-05
1.5	2.5	-4	0.000890666	0.0227763	7e-06	3.53e-05	0.004807	0.00697855	3.53321e-05	4.25472e-05
1.6	2.5	-4	0.00087432	0.0230604	6.6e-06	3.58e-05	0.00488529	0.00704454	3.57711e-05	4.22943e-05
1.7	2.5	-4	0.00085923	0.0233324	6.2e-06	3.62e-05	0.00496426	0.0071064	3.61659e-05	4.20685e-05
1.8	2.5	-4	0.000846005	0.0235926	5.8e-06	3.65e-05	0.00504304	0.00716451	3.65227e-05	4.18767e-05
1.9	2.5	-4	0.000831419	0.0238522	5.39e-06	3.69e-05	0.00512494	0.00722137	3.68567e-05	4.16659e-05
2	2.5	-4	0.000818624	0.0241025	4.97e-06	3.72e-05	0.00520645	0.00727536	3.71618e-05	4.14866e-05
1.2	2.5	-3	0.00100648	0.0211447	8.37e-06	3.18e-05	0.00453582	0.00654743	3.1812e-05	4.45689e-05
1.3	2.5	-3	0.000980956	0.0215328	7.99e-06	3.26e-05	0.00461137	0.00664777	3.25879e-05	4.41137e-05
1.4	2.5	-3	0.000957029	0.0218897	7.6e-06	3.33e-05	0.00468866	0.0067376	3.32596e-05	4.36981e-05
1.5	2.5	-3	0.000938379	0.0222089	7.21e-06	3.38e-05	0.00476406	0.00681594	3.38249e-05	4.33817e-05
1.6	2.5	-3	0.000922282	0.0225056	6.83e-06	3.43e-05	0.00483925	0.0068871	3.43204e-05	4.3114e-05
1.7	2.5	-3	0.000904796	0.022796	6.44e-06	3.48e-05	0.00491779	0.00695521	3.47763e-05	4.28293e-05
1.8	2.5	-3	0.000891314	0.0230649	6.05e-06	3.52e-05	0.0049941	0.00701705	3.51758e-05	4.26153e-05
1.9	2.5	-3	0.000876402	0.0233312	5.65e-06	3.55e-05	0.00507366	0.00707704	3.5547e-05	4.23834e-05
2	2.5	-3	0.000865488	0.0235795	5.26e-06	3.59e-05	0.00515021	0.00713218	3.58777e-05	4.22185e-05
1.2	2.5	-2	0.00105969	0.0204252	8.56e-06	2.99e-05	0.00449751	0.00633428	2.98702e-05	4.56302e-05
1.3	2.5	-2	0.00102953	0.0208767	8.18e-06	3.08e-05	0.00457348	0.00645483	3.08212e-05	4.50603e-05
1.4	2.5	-2	0.00100669	0.0212631	7.81e-06	3.16e-05	0.00464694	0.00655538	3.15945e-05	4.46368e-05
1.5	2.5	-2	0.00098644	0.0216138	7.43e-06	3.23e-05	0.0047208	0.00664439	3.22593e-05	4.42734e-05
1.6	2.5	-2	0.000966085	0.0219474	7.05e-06	3.29e-05	0.0047972	0.00672711	3.28586e-05	4.39153e-05
1.7	2.5	-2	0.000948655	0.0222541	6.66e-06	3.34e-05	0.00487305	0.00680138	3.3378e-05	4.36162e-05
1.8	2.5	-2	0.000932629	0.0225441	6.27e-06	3.38e-05	0.00494948	0.00687011	3.3842e-05	4.33465e-05
1.9	2.5	-2	0.00091734	0.022823	5.88e-06	3.43e-05	0.00502699	0.00693494	3.42647e-05	4.30914e-05
2	2.5	-2	0.000903387	0.0230887	5.49e-06	3.46e-05	0.00510474	0.00699545	3.46438e-05	4.28657e-05
1.2	2.5	-1	0.00111088	0.0196459	8.75e-06	2.78e-05	0.00446064	0.00610156	2.78016e-05	4.6744e-05
1.3	2.5	-1	0.00108288	0.0201426	8.39e-06	2.89e-05	0.00453187	0.0062381	2.88866e-05	4.61564e-05
1.4	2.5	-1	0.00105441	0.0205976	8.01e-06	2.98e-05	0.00460686	0.00636018	2.98406e-05	4.55959e-05
1.5	2.5	-1	0.00102977	0.0210013	7.63e-06	3.06e-05	0.00468181	0.00646586	3.06483e-05	4.51256e-05
1.6	2.5	-1	0.00100833	0.0213653	7.25e-06	3.13e-05	0.00475664	0.0065589	3.13411e-05	4.47287e-05
1.7	2.5	-1	0.000988785	0.0217018	6.87e-06	3.19e-05	0.00483212	0.00664295	3.1949e-05	4.43772e-05
1.8	2.5	-1	0.000972562	0.0220095	6.49e-06	3.25e-05	0.00490635	0.00671814	3.24766e-05	4.40886e-05
1.9	2.5	-1	0.000956881	0.0223033	6.11e-06	3.3e-05	0.00498192	0.00678847	3.29544e-05	4.38167e-05
2	2.5	-1	0.000942362	0.0225832	5.73e-06	3.34e-05	0.00505797	0.00685415	3.33861e-05	4.35684e-05
1.2	2.5	0	0.00116259	0.0187423	8.94e-06	2.55e-05	0.00442341	0.00582962	2.54582e-05	4.80204e-05
1.3	2.5	0	0.00113252	0.0193371	8.59e-06	2.68e-05	0.00449316	0.00599787	2.67915e-05	4.73067e-05
1.4	2.5	0	0.00110164	0.0198709	8.21e-06	2.8e-05	0.00456718	0.00614536	2.79514e-05	4.66313e-05
1.5	2.5	0	0.00107692	0.0203198	7.85e-06	2.89e-05	0.00463937	0.0062664	2.88886e-05	4.61114e-05
1.6	2.5	0	0.00105239	0.020734	7.47e-06	2.97e-05	0.00471435	0.00637552	2.97173e-05	4.56248e-05
1.7	2.5	0	0.00103457	0.021088	7.11e-06	3.04e-05	0.00478542	0.00646662	3.03928e-05	4.52756e-05
1.8	2.5	0	0.00101301	0.0214438	6.71e-06	3.1e-05	0.00486267	0.00655631	3.10426e-05	4.48744e-05
1.9	2.5	0	0.000997115	0.0217555	6.34e-06	3.16e-05	0.00493605	0.00663315	3.15827e-05	4.45833e-05
2	2.5	0	0.000980022	0.0220626	5.95e-06	3.21e-05	0.00501277	0.00670743	3.20908e-05	4.42771e-05
1.2	2.5	1	0.00121717	0.0176312	9.14e-06	2.27e-05	0.00438412	0.00549269	2.26754e-05	4.9528e-05
1.3	2.5	1	0.00118013	0.0184019	8.77e-06	2.44e-05	0.00445602	0.00571627	2.44108e-05	4.85792e-05
1.4	2.5	1	0.0011496	0.0190288	8.41e-06	2.58e-05	0.0045269	0.00589431	2.58012e-05	4.782e-05
1.5	2.5	1	0.00112215	0.0195652	8.05e-06	2.7e-05	0.00459866	0.00604335	2.69601e-05	4.71748e-05
1.6	2.5	1	0.00109726	0.0200348	7.68e-06	2.79e-05	0.00467127	0.00617084	2.79398e-05	4.66211e-05
1.7	2.5	1	0.00107326	0.0204625	7.31e-06	2.88e-05	0.00474595	0.00628433	2.87976e-05	4.61166e-05
1.8	2.5	1	0.00105363	0.0208375	6.94e-06	2.95e-05	0.0048188	0.00638163	2.95174e-05	4.57148e-05
1.9	2.5	1	0.00103495	0.0211867	6.56e-06	3.02e-05	0.00489292	0.00647027	3.01577e-05	4.535e-05
2	2.5	1	0.00101791	0.0215118	6.18e-06	3.07e-05	0.00496731	0.00655113	3.07273e-05	4.50262e-05
1.2	2.5	2	0.00127137	0.0163454	9.34e-06	1.96e-05	0.0043451	0.00510018	1.96149e-05	5.10983e-05
1.3	2.5	2	0.00122824	0.0173053	8.96e-06	2.17e-05	0.0044185	0.0053837	2.17215e-05	4.99731e-05
1.4	2.5	2	0.00119318	0.0180754	8.6e-06	2.34e-05	0.00449029	0.00560716	2.34203e-05	4.9059e-05
1.5	2.5	2	0.00116317	0.0187198	8.24e-06	2.48e-05	0.00456175	0.00579062	2.48288e-05	4.82909e-05
1.6	2.5	2	0.00113534	0.0192851	7.87e-06	2.6e-05	0.00463472	0.00594839	2.6041e-05	4.76066e-05
1.7	2.5	2	0.00111329	0.0197543	7.51e-06	2.7e-05	0.00470512	0.00607644	2.70153e-05	4.70815e-05
1.8	2.5	2	0.00109022	0.0201961	7.14e-06	2.79e-05	0.00477929	0.00619457	2.79035e-05	4.65651e-05
1.9	2.5	2	0.00107308	0.0205672	6.78e-06	2.86e-05	0.00484945	0.00629146	2.86165e-05	4.61913e-05
2	2.5	2	0.00105484	0.0209261	6.41e-06	2.93e-05	0.004923	0.00638342	2.92808e-05	4.58134e-05
1.2	2.5	3	0.00133933	0.0144202	9.58e-06	1.54e-05	0.00429617	0.00458161	1.53908e-05	5.32815e-05
1.3	2.5	3	0.00128886	0.0158805	9.2e-06	1.84e-05	0.00437121	0.00494987	1.84351e-05	5.17174e-05
1.4	2.5	3	0.00124504	0.0169012	8.82e-06	2.06e-05	0.00444672	0.00525205	2.06231e-05	5.05443e-05
1.5	2.5	3	0.00120993	0.0176901	8.45e-06	2.23e-05	0.00451967	0.00548124	2.23251e-05	4.96297e-05
1.6	2.5	3	0.00117714	0.0183846	8.07e-06	2.38e-05	0.00459459	0.00567959	2.38203e-05	4.87884e-05
1.7	2.5	3	0.00115444	0.0189252	7.72e-06	2.5e-05	0.00466315	0.00583092	2.49634e-05	4.81952e-05
1.8	2.5	3	0.00113068	0.0194328	7.36e-06	2.6e-05	0.00473559	0.00597048	2.60154e-05	4.76075e-05
1.9	2.5	3	0.00110996	0.0198792	6.99e-06	2.69e-05	0.0048074	0.00609079	2.69136e-05	4.71092e-05
2	2.5	3	0.00109057	0.0202855	6.63e-06	2.77e-05	0.00488011	0.00619806	2.77029e-05	4.66644e-05
1.4	2.5	4	0.00130074	0.0153949	9.06e-06	1.72e-05	0.00439994	0.00479294	1.72429e-05	5.22787e-05
1.5	2.5	4	0.00125739	0.0165163	8.67e-06	1.96e-05	0.00447695	0.00512625	1.95971e-05	5.10279e-05
1.6	2.5	4	0.00122165	0.0173435	8.29e-06	2.13e-05	0.00455186	0.005367	2.13466e-05	5.00837e-05
1.7	2.5	4	0.00119488	0.0179901	7.93e-06	2.27e-05	0.0046219	0.00555174	2.27081e-05	4.93756e-05
1.8	2.5	4	0.00116975	0.0185708	7.57e-06	2.39e-05	0.00469339	0.00571499	2.39203e-05	4.87218e-05
1.9	2.5	4	0.0011457	0.0191032	7.2e-06	2.5e-05	0.00476666	0.00586221	2.50158e-05	4.81089e-05
2	2.5	4	0.00112523	0.0195673	6.84e-06	2.59e-05	0.00483853	0.00598811	2.59469e-05	4.75961e-05
1.5	2.5	5	0.00131363	0.0147548	8.92e-06	1.58e-05	0.00442633	0.00479855	1.57703e-05	5.29762e-05
1.6	2.5	5	0.00127497	0.0159817	8.55e-06	1.83e-05	0.00450067	0.00495562	1.82778e-05	5.16993e-05
1.7	2.5	5	0.00123938	0.0168949	8.16e-06	2.02e-05	0.00457652	0.00522308	2.01754e-05	5.06891e-05
1.8	2.5	5	0.00120784	0.0176274	7.78e-06	2.17e-05	0.00465225	0.00543337	2.16951e-05	4.98576e-05
1.9	2.5	5	0.00118504	0.018198	7.43e-06	2.29e-05	0.00472181	0.00559411	2.2865e-05	4.92526e-05
2	2.5	5	0.00116123	0.0187452	7.06e-06	2.4e-05	0.00479533	0.00574602	2.39769e-05	4.86366e-05
1.7	2.5	6	0.00128753	0.0153945	8.41e-06	1.69e-05	0.0045274	0.00496701	1.68855e-05	5.23485e-05
1.8	2.5	6	0.00125265	0.0164356	8.02e-06	1.9e-05	0.00460386	0.00509443	1.90088e-05	5.12396e-05
1.9	2.5	6	0.00122603	0.0171688	7.66e-06	2.05e-05	0.00467508	0.00528732	2.05054e-05	5.04739e-05
2	2.5	6	0.00119802	0.0178325	7.28e-06	2.19e-05	0.00475117	0.00547554	2.18526e-05	4.97334e-05
1.9	2.5	7	0.00127083	0.0157637	7.92e-06	1.74e-05	0.00462401	0.00512802	1.74295e-05	5.20296e-05
2	2.5	7	0.00123916	0.0167024	7.53e-06	1.93e-05	0.00470181	0.00525768	1.93231e-05	5.10289e-05

## Sheet: （12，30.3）
																					whole potentials of the equilibrium droplet		the unit length energy barrier
0	0	0	0.001934	0	1.18e-05	1.18e-05	0.003868	0.003868	0	4.70027e-05		(0,0,0)	-2.953	29.15	-2.304	-0.8029	-18590	41.7	91.35		3.198e-06		5.6e-06
0.2	0	0	0.00181087	0.00356386	1.17e-05	1.18e-05	0.00388278	0.00389263	1.00815e-06	4.56488e-05		(1,0,0)	3.865	-25.39	4.365	4.476	51780	1.668	-48.73
0.4	0	0	0.00171073	0.00500554	1.15e-05	1.19e-05	0.00392159	0.00395731	1.97556e-06	4.46281e-05		(0,1,0)	3.67	1.102	3.472	2.904	398.1	-0.9722	-1.973
0.6	0	0	0.00161059	0.00610165	1.12e-05	1.21e-05	0.00398443	0.00406205	2.90411e-06	4.36396e-05		(0,0,1)	-1.096	1.644	-1.037	-0.949	496.9	13.78	0.556
0.75	0	0	0.00156378	0.0062615	1.09e-05	1.23e-05	0.0040346	0.00414566	3.03225e-06	4.25245e-05		(2,0,0)	2.238	-15.44	2.042	2.082	-52400	-14.74	-44.83
0.8	0	0	0.00146443	0.0091838	1.06e-05	1.24e-05	0.00409339	0.00424366	6.4584e-06	4.1001e-05		(1,1,0)	5.83	5.957	5.969	6.023	434.9	1.701	2.388
0.85	0	0	0.00139166	0.0109416	1.04e-05	1.26e-05	0.00414459	0.00432899	9.08842e-06	4.00775e-05		(1,0,1)	1.826	-4.215	1.758	1.584	-1072	-30.98	-1.643
0.9	0	0	0.00133448	0.0121811	1.01e-05	1.27e-05	0.00419174	0.00440756	1.11754e-05	3.94758e-05		(0,2,0)	3.527	1.125	3.337	2.792	521.7	-1.657	-1.967
1	0	0	0.0012671	0.0136962	9.72e-06	1.39e-05	0.00426814	0.0045349	1.3949e-05	3.96503e-05		(0,1,1)	-0.3416	0.9519	0.9526	0.9525	-115.3	0.9508	0.952
1.1	0	0	0.00120785	0.0148671	9.32e-06	1.62e-05	0.00434726	0.00466676	1.62215e-05	3.98258e-05		(0,0,2)	2.773	-0.001676	0.03529	0.03694	-3.245	-0.1026	0.002981
1.2	0	0	0.00115969	0.0158177	8.93e-06	1.81e-05	0.0044255	0.00491952	1.81266e-05	4.00878e-05		(3,0,0)	-0.8143	33.06	-0.7641	-0.7208	23030	-10.16	59.64
1.3	0	0	0.00112399	0.0166153	8.55e-06	1.98e-05	0.00449981	0.00515226	1.97586e-05	4.05308e-05		(2,1,0)	1.706	4.897	3.089	3.024	467.2	13.53	3.479
1.5	0	0	0.00106528	0.0179458	7.79e-06	2.25e-05	0.00464985	0.00553202	2.24946e-05	4.14385e-05		(2,0,1)	3.753	3.344	-0.8152	-0.7267	760.8	22.75	1.602
1.7	0	0	0.00101844	0.0190514	7.02e-06	2.47e-05	0.00480187	0.0058384	2.47407e-05	4.23185e-05		(1,2,0)	-0.0439	0.8882	1.741	1.72	5.25	-1.942	0.4311
1.2	0	-5	0.000904903	0.0222821	8e-06	3.49e-05	0.00460895	0.00687975	3.4909e-05	4.29611e-05		(1,1,1)	2.814	3.476	4.129	4.08	113.6	3.519	1.001
1.3	0	-5	0.000882135	0.022611	7.6e-06	3.55e-05	0.00468846	0.00695966	3.54887e-05	4.25976e-05		(1,0,2)	0.7638	-0.0001706	-0.04949	-0.05266	4.555	0.1429	-0.005361
1.4	0	-5	0.000864587	0.0229128	7.2e-06	3.6e-05	0.00476631	0.00703134	3.59899e-05	4.23269e-05		(0,3,0)	0.09639	0.9241	2.665	2.23	-519.1	-0.666	-1.476
1.5	0	-5	0.000845577	0.0232067	6.79e-06	3.64e-05	0.00484758	0.00709939	3.64437e-05	4.20402e-05		(0,2,1)	0.2301	0.7615	0.7625	0.7629	-580.6	0.7547	0.7599
1.6	0	-5	0.00082997	0.0234843	6.38e-06	3.68e-05	0.00492787	0.00716248	3.68493e-05	4.18121e-05		(0,1,2)	0.04905	0.7562	0.7924	0.7868	0.7754	0.7932	0.7651
1.7	0	-5	0.000815829	0.0237502	5.98e-06	3.72e-05	0.00500853	0.00722165	3.72128e-05	4.16145e-05		(0,0,3)	-1.031	-9.949e-06	-0.0002204	-0.0002296	0.009124	0.0003637	-1.275e-05
1.8	0	-5	0.000803738	0.0240049	5.57e-06	3.75e-05	0.00508868	0.00727735	3.75415e-05	4.14524e-05		(4,0,0)	0.09639	-10.72	-0.337	-0.4885	-3731	6.004	-15.31
1.9	0	-5	0.000787812	0.0242653	5.13e-06	3.79e-05	0.00517465	0.00733303	3.78513e-05	4.12325e-05		(3,1,0)	0.2301	-20.12	0.01652	-0.1489	-1291	-68.6	-16.99
2	0	-5	0.00077688	0.0245079	4.72e-06	3.81e-05	0.00525654	0.00738425	3.81268e-05	4.10952e-05		(3,0,1)	0.04905	-0.8632	0.05948	0.04744	-177.1	-5.395	-0.5133
1.2	0	-4	0.000957049	0.0216723	8.19e-06	3.32e-05	0.0045714	0.00670137	3.32263e-05	4.39034e-05		(2,2,0)	-1.031	14.08	-0.7637	-0.5429	897.3	48.76	12.34
1.3	0	-4	0.00093345	0.022029	7.8e-06	3.39e-05	0.00464843	0.00679112	3.39035e-05	4.34976e-05		(2,1,1)	0.1351	-0.1608	0.1341	0.1456	-19.19	-0.7323	-0.1598
1.4	0	-4	0.000911843	0.0223599	7.4e-06	3.45e-05	0.00472661	0.00687221	3.44928e-05	4.31332e-05		(2,0,2)	0.0149	0.002337	0.01707	0.01863	-1.542	-0.04727	0.002469
1.5	0	-4	0.000895973	0.0226576	7.02e-06	3.5e-05	0.00480222	0.00694344	3.49913e-05	4.28758e-05		(1,3,0)	-0.3936	-4.135	-0.5367	-0.6052	-269.5	-12.42	-3.489
1.6	0	-4	0.000878073	0.0229506	6.62e-06	3.55e-05	0.00488169	0.00701196	3.54515e-05	4.25893e-05		(1,2,1)	-0.8231	-0.6154	-0.8963	-0.8915	-12.85	-0.3372	-0.1172
1.7	0	-4	0.000863813	0.0232242	6.22e-06	3.59e-05	0.00495959	0.00707467	3.58575e-05	4.23679e-05		(1,1,2)	0.001568	-0.0003686	0.001635	0.001727	-0.1068	-0.00298	-0.0005033
1.8	0	-4	0.000848812	0.0234927	5.82e-06	3.62e-05	0.00504	0.00713497	3.62311e-05	4.21398e-05		(1,0,3)	0.0001394	1.136e-05	0.0001589	0.0001671	-0.006415	-0.0002453	1.133e-05
1.9	0	-4	0.000837526	0.0237452	5.42e-06	3.66e-05	0.00511798	0.00719084	3.65665e-05	4.19746e-05		(0,4,0)	-0.7523	0.06479	-0.698	-0.5776	100.9	1.249	0.667
2	0	-4	0.000825417	0.0239959	5.02e-06	3.69e-05	0.0051983	0.00724533	3.68801e-05	4.17989e-05		(0,3,1)	-0.1813	-0.2002	-0.1815	-0.1811	119.5	-0.2343	-0.2007
1.2	0	-3	0.00100586	0.0210288	8.37e-06	3.15e-05	0.00453626	0.00651143	3.14619e-05	4.48504e-05		(0,2,2)	-0.1527	-0.1512	-0.1589	-0.1578	-0.1286	-0.1579	-0.1529
1.3	0	-3	0.000981441	0.0214237	7.99e-06	3.23e-05	0.004611	0.00661421	3.22607e-05	4.44023e-05		(0,1,3)	4.703e-06	7.733e-08	4.938e-06	5.079e-06	-0.0001701	-3.949e-06	-8.689e-07
1.4	0	-3	0.000958528	0.0217864	7.6e-06	3.3e-05	0.0046874	0.00670612	3.2953e-05	4.39931e-05		(0,0,4)	3.352e-07	1.671e-08	3.954e-07	4.079e-07	-9.788e-06	-5.519e-07	1.211e-08
1.5	0	-3	0.000938453	0.0221177	7.21e-06	3.35e-05	0.00476399	0.00678796	3.35479e-05	4.36447e-05
1.6	0	-3	0.000920768	0.0224256	6.83e-06	3.41e-05	0.0048407	0.00686224	3.4069e-05	4.33432e-05
1.7	0	-3	0.000906317	0.0227104	6.44e-06	3.45e-05	0.00491624	0.0069295	3.45241e-05	4.31021e-05
1.8	0	-3	0.0008911	0.0229886	6.05e-06	3.49e-05	0.00499433	0.0069938	3.49424e-05	4.28543e-05
1.9	0	-3	0.000879165	0.0232487	5.66e-06	3.53e-05	0.00507051	0.00705286	3.53136e-05	4.26641e-05
2	0	-3	0.000866361	0.0235064	5.26e-06	3.57e-05	0.00514917	0.00711032	3.56612e-05	4.24623e-05
1.2	0	-2	0.00105878	0.0203111	8.56e-06	2.95e-05	0.00449816	0.0062987	2.9534e-05	4.59269e-05
1.3	0	-2	0.00103107	0.0207634	8.18e-06	3.05e-05	0.00457228	0.00642009	3.04934e-05	4.53861e-05
1.4	0	-2	0.00100699	0.0211652	7.81e-06	3.13e-05	0.00464669	0.00652525	3.13054e-05	4.49301e-05
1.5	0	-2	0.000985376	0.0215299	7.43e-06	3.2e-05	0.00472176	0.00661836	3.20045e-05	4.45335e-05
1.6	0	-2	0.000965727	0.0218672	7.04e-06	3.26e-05	0.00479754	0.00670242	3.26169e-05	4.41805e-05
1.7	0	-2	0.000946739	0.0221868	6.65e-06	3.32e-05	0.00487501	0.00678031	3.31662e-05	4.38455e-05
1.8	0	-2	0.000931274	0.0224789	6.27e-06	3.36e-05	0.00495094	0.00684987	3.36388e-05	4.35806e-05
1.9	0	-2	0.000916505	0.0227595	5.88e-06	3.41e-05	0.00502794	0.00691539	3.40691e-05	4.33303e-05
2	0	-2	0.00090303	0.0230275	5.49e-06	3.45e-05	0.00510516	0.00697679	3.4458e-05	4.31058e-05
1.2	0	-1	0.00111049	0.0195185	8.75e-06	2.74e-05	0.00446093	0.00606191	2.74408e-05	4.70832e-05
1.3	0	-1	0.00107785	0.0200578	8.37e-06	2.86e-05	0.00453579	0.00621088	2.86257e-05	4.63889e-05
1.4	0	-1	0.001053	0.0205045	8e-06	2.96e-05	0.00460804	0.00633114	2.95658e-05	4.58797e-05
1.5	0	-1	0.00102911	0.0209141	7.63e-06	3.04e-05	0.0046824	0.00643888	3.03916e-05	4.54098e-05
1.6	0	-1	0.0010085	0.0212816	7.25e-06	3.11e-05	0.00475648	0.00653324	3.10968e-05	4.50189e-05
1.7	0	-1	0.00098956	0.0216226	6.87e-06	3.17e-05	0.00483133	0.00661889	3.17201e-05	4.46674e-05
1.8	0	-1	0.000969716	0.0219526	6.48e-06	3.23e-05	0.00490943	0.00669998	3.22931e-05	4.43101e-05
1.9	0	-1	0.000954494	0.0222492	6.1e-06	3.28e-05	0.00498464	0.0067713	3.27806e-05	4.40394e-05
2	0	-1	0.000938288	0.0225407	5.7e-06	3.32e-05	0.00506285	0.00684003	3.32353e-05	4.37575e-05
1.2	0	1	0.00121169	0.0174966	9.12e-06	2.23e-05	0.00438806	0.00544989	2.2316e-05	4.98283e-05
1.3	0	1	0.00117552	0.0182819	8.76e-06	2.41e-05	0.00445962	0.00567815	2.4079e-05	4.88798e-05
1.4	0	1	0.00114061	0.0189645	8.38e-06	2.56e-05	0.00453444	0.00587266	2.55958e-05	4.80085e-05
1.5	0	1	0.00111377	0.0195095	8.01e-06	2.68e-05	0.00460621	0.00602436	2.6774e-05	4.73598e-05
1.6	0	1	0.00108941	0.0199861	7.65e-06	2.78e-05	0.00467881	0.00615405	2.77705e-05	4.68024e-05
1.7	0	1	0.00106855	0.0204019	7.28e-06	2.86e-05	0.00475076	0.00626459	2.86055e-05	4.63471e-05
1.8	0	1	0.00104671	0.0207984	6.9e-06	2.94e-05	0.00482627	0.00636783	2.93717e-05	4.5894e-05
1.9	0	1	0.00102844	0.0211515	6.52e-06	3e-05	0.00490034	0.0064577	3.00223e-05	4.55272e-05
2	0	1	0.00101448	0.0214639	6.16e-06	3.06e-05	0.00497143	0.00653554	3.05708e-05	4.52511e-05
1.2	0	2	0.00126823	0.016156	9.32e-06	1.92e-05	0.00434735	0.00504061	1.91557e-05	5.14723e-05
1.3	0	2	0.00122604	0.0171391	8.95e-06	2.13e-05	0.00442021	0.00533164	2.13003e-05	5.03457e-05
1.4	0	2	0.00118919	0.0179493	8.58e-06	2.31e-05	0.00449364	0.0055673	2.3082e-05	4.93772e-05
1.5	0	2	0.00115491	0.018651	8.2e-06	2.46e-05	0.00456918	0.00576765	2.46169e-05	4.85014e-05
1.6	0	2	0.00113262	0.0191816	7.86e-06	2.58e-05	0.00463733	0.00591589	2.57516e-05	4.79209e-05
1.7	0	2	0.00110855	0.019681	7.49e-06	2.68e-05	0.00470996	0.00605275	2.67943e-05	4.73377e-05
1.8	0	2	0.00108596	0.0201301	7.11e-06	2.77e-05	0.00478388	0.00617324	2.77011e-05	4.68171e-05
1.9	0	2	0.00106664	0.0205254	6.74e-06	2.85e-05	0.0048568	0.00627693	2.84672e-05	4.63885e-05
2	0	2	0.00104876	0.0208886	6.37e-06	2.91e-05	0.00493029	0.00637024	2.91425e-05	4.60084e-05
1.2	0	3	0.00133559	0.0140959	9.57e-06	1.47e-05	0.00429885	0.00458609	1.46998e-05	5.37582e-05
1.3	0	3	0.0012807	0.0157427	9.17e-06	1.81e-05	0.00437757	0.00490567	1.80976e-05	5.19896e-05
1.4	0	3	0.00123769	0.0167919	8.79e-06	2.03e-05	0.0044529	0.00521677	2.03364e-05	5.0803e-05
1.5	0	3	0.00120323	0.0175921	8.42e-06	2.21e-05	0.00452569	0.00544956	2.20567e-05	4.98894e-05
1.6	0	3	0.00116936	0.0183126	8.03e-06	2.36e-05	0.00460205	0.00565567	2.36054e-05	4.90118e-05
1.7	0	3	0.0011471	0.0188601	7.69e-06	2.48e-05	0.00467064	0.00580918	2.47621e-05	4.84171e-05
1.8	0	3	0.00112379	0.0193743	7.32e-06	2.58e-05	0.00474303	0.00595081	2.58283e-05	4.78284e-05
1.9	0	3	0.00110347	0.0198269	6.96e-06	2.67e-05	0.00481481	0.00607306	2.67407e-05	4.73274e-05
2	0	3	0.00108195	0.0202593	6.57e-06	2.76e-05	0.00489045	0.00618765	2.75863e-05	4.68273e-05
1.4	0	4	0.00129302	0.0152269	9.02e-06	1.69e-05	0.00440642	0.00476537	1.68508e-05	5.25874e-05
1.5	0	4	0.00125042	0.0163953	8.64e-06	1.93e-05	0.00448322	0.0050874	1.92911e-05	5.13046e-05
1.6	0	4	0.00121531	0.0172412	8.26e-06	2.11e-05	0.00455794	0.00533404	2.10745e-05	5.03536e-05
1.7	0	4	0.00118629	0.0179271	7.89e-06	2.25e-05	0.00463067	0.00553041	2.25175e-05	4.95826e-05
1.8	0	4	0.0011627	0.0185012	7.53e-06	2.37e-05	0.004701	0.00569189	2.37123e-05	4.89562e-05
1.9	0	4	0.00113907	0.0190397	7.16e-06	2.48e-05	0.00477422	0.00584102	2.48197e-05	4.8343e-05
2	0	4	0.00111896	0.01951	6.8e-06	2.58e-05	0.00484604	0.00596885	2.57642e-05	4.78271e-05
1.6	0	5	0.00126818	0.0158318	8.51e-06	1.79e-05	0.00450718	0.00493331	1.79174e-05	5.20071e-05
1.7	0	5	0.00123319	0.0167795	8.13e-06	1.99e-05	0.00458283	0.00518612	1.98804e-05	5.09745e-05
1.8	0	5	0.00120218	0.0175285	7.75e-06	2.14e-05	0.00465836	0.00540161	2.14313e-05	5.01357e-05
1.9	0	5	0.00117439	0.0181686	7.37e-06	2.27e-05	0.00473396	0.00558244	2.27467e-05	4.94071e-05
2	0	5	0.00115475	0.0186777	7.02e-06	2.38e-05	0.0048031	0.00572361	2.37749e-05	4.88789e-05
1.7	0	6	0.00128091	0.0152065	8.38e-06	1.65e-05	0.00453416	0.00497826	1.64575e-05	5.2693e-05
1.8	0	6	0.00124659	0.0162954	7.99e-06	1.87e-05	0.0046104	0.00510534	1.86662e-05	5.15525e-05
1.9	0	6	0.00121518	0.0171287	7.6e-06	2.04e-05	0.00468745	0.00527243	2.03691e-05	5.06397e-05
2	0	6	0.00119286	0.017735	7.25e-06	2.16e-05	0.00475737	0.00544428	2.15927e-05	5.00181e-05
1.9	0	7	0.00126477	0.0155822	7.89e-06	1.7e-05	0.00463093	0.00513954	1.70114e-05	5.23788e-05
2	0	7	0.00123358	0.0165642	7.5e-06	1.9e-05	0.0047085	0.00526883	1.89842e-05	5.13471e-05
1.2	0.5	-5	0.000894222	0.0223912	7.96e-06	3.52e-05	0.00461664	0.00691136	3.52079e-05	4.27793e-05
1.3	0.5	-5	0.000873293	0.0227127	7.56e-06	3.58e-05	0.00469535	0.00698909	3.57689e-05	4.24504e-05
1.4	0.5	-5	0.000855109	0.023014	7.16e-06	3.63e-05	0.00477427	0.00706025	3.62625e-05	4.21737e-05
1.5	0.5	-5	0.000838178	0.0233006	6.76e-06	3.67e-05	0.00485424	0.00712633	3.67006e-05	4.1926e-05
1.6	0.5	-5	0.000822055	0.0235777	6.35e-06	3.71e-05	0.00493547	0.0071889	3.70984e-05	4.16948e-05
1.7	0.5	-5	0.000807444	0.0238438	5.93e-06	3.75e-05	0.00501709	0.0072478	3.74565e-05	4.14931e-05
1.8	0.5	-5	0.000793519	0.0241018	5.51e-06	3.78e-05	0.00509972	0.00730374	3.77801e-05	4.13063e-05
1.9	0.5	-5	0.000779711	0.0243551	5.09e-06	3.81e-05	0.00518389	0.00735766	3.80773e-05	4.11248e-05
2	0.5	-5	0.000768418	0.0245982	4.67e-06	3.83e-05	0.0052667	0.00740871	3.83481e-05	4.09841e-05
1.2	0.5	-4	0.000949396	0.0217635	8.16e-06	3.35e-05	0.00457691	0.00672811	3.34766e-05	4.37618e-05
1.3	0.5	-4	0.000925206	0.0221183	7.77e-06	3.41e-05	0.00465486	0.00681693	3.41434e-05	4.33481e-05
1.4	0.5	-4	0.00090552	0.0224397	7.38e-06	3.47e-05	0.00473192	0.0068953	3.47096e-05	4.3021e-05
1.5	0.5	-4	0.000889235	0.0227365	6.99e-06	3.52e-05	0.00480829	0.00696602	3.52016e-05	4.27594e-05
1.6	0.5	-4	0.000873434	0.0230221	6.6e-06	3.56e-05	0.00488614	0.00703261	3.56476e-05	4.25089e-05
1.7	0.5	-4	0.000856308	0.0233024	6.18e-06	3.61e-05	0.00496725	0.00709647	3.60561e-05	4.22445e-05
1.8	0.5	-4	0.000843516	0.0235641	5.79e-06	3.64e-05	0.00504572	0.00715512	3.6419e-05	4.20537e-05
1.9	0.5	-4	0.000829373	0.0238245	5.37e-06	3.68e-05	0.00512727	0.00721236	3.67577e-05	4.18447e-05
2	0.5	-4	0.000816975	0.024075	4.96e-06	3.71e-05	0.00520843	0.00726652	3.70656e-05	4.16683e-05
1.2	0.5	-3	0.00100145	0.0211046	8.35e-06	3.17e-05	0.00453943	0.00653407	3.16727e-05	4.47587e-05
1.3	0.5	-3	0.000976606	0.0214966	7.97e-06	3.25e-05	0.00461477	0.00663571	3.24606e-05	4.43071e-05
1.4	0.5	-3	0.000953303	0.0218569	7.58e-06	3.31e-05	0.00469179	0.00672668	3.31432e-05	4.38943e-05
1.5	0.5	-3	0.000932872	0.0221868	7.19e-06	3.37e-05	0.00476901	0.00680785	3.37308e-05	4.35416e-05
1.6	0.5	-3	0.000917199	0.0224855	6.81e-06	3.42e-05	0.00484413	0.00687967	3.42326e-05	4.3276e-05
1.7	0.5	-3	0.000900152	0.0227782	6.41e-06	3.47e-05	0.00492252	0.00694852	3.46959e-05	4.29918e-05
1.8	0.5	-3	0.000887032	0.023048	6.03e-06	3.51e-05	0.00499872	0.00701071	3.50989e-05	4.27806e-05
1.9	0.5	-3	0.000872494	0.0233154	5.62e-06	3.55e-05	0.00507812	0.00707108	3.54742e-05	4.25505e-05
2	0.5	-3	0.000859463	0.0235729	5.22e-06	3.58e-05	0.00515744	0.00712829	3.58174e-05	4.23473e-05
1.2	0.5	-2	0.00105421	0.0203855	8.54e-06	2.97e-05	0.00450145	0.00632096	2.97349e-05	4.58287e-05
1.3	0.5	-2	0.00102543	0.0208385	8.16e-06	3.07e-05	0.00457669	0.00644222	3.06926e-05	4.52711e-05
1.4	0.5	-2	0.00100101	0.0212372	7.78e-06	3.15e-05	0.00465171	0.00654616	3.14932e-05	4.48146e-05
1.5	0.5	-2	0.000979082	0.0216007	7.4e-06	3.22e-05	0.00472743	0.00663865	3.21859e-05	4.44127e-05
1.6	0.5	-2	0.000959154	0.0219359	7.01e-06	3.28e-05	0.00480385	0.00672186	3.27892e-05	4.40586e-05
1.7	0.5	-2	0.000942098	0.022245	6.63e-06	3.33e-05	0.00487974	0.00679689	3.33155e-05	4.37596e-05
1.8	0.5	-2	0.000926419	0.0225366	6.24e-06	3.38e-05	0.00495619	0.00686611	3.3784e-05	4.34917e-05
1.9	0.5	-2	0.000913691	0.022808	5.86e-06	3.42e-05	0.00503115	0.00692929	3.41972e-05	4.32774e-05
2	0.5	-2	0.000897799	0.0230847	5.45e-06	3.46e-05	0.00511144	0.00699249	3.45955e-05	4.30123e-05
1.2	0.5	-1	0.00110537	0.0195995	8.73e-06	2.77e-05	0.00446461	0.00608618	2.76524e-05	4.69635e-05
1.3	0.5	-1	0.00107517	0.0201178	8.36e-06	2.88e-05	0.00453789	0.00622893	2.87873e-05	4.63224e-05
1.4	0.5	-1	0.00104724	0.0205768	7.98e-06	2.98e-05	0.00461288	0.00635226	2.97513e-05	4.57611e-05
1.5	0.5	-1	0.00102594	0.0209691	7.61e-06	3.05e-05	0.00468525	0.0064551	3.05376e-05	4.5343e-05
1.6	0.5	-1	0.00100155	0.0213527	7.22e-06	3.13e-05	0.00476315	0.00655338	3.12715e-05	4.48865e-05
1.7	0.5	-1	0.000982377	0.0216922	6.84e-06	3.19e-05	0.00483865	0.00663835	3.18876e-05	4.45333e-05
1.8	0.5	-1	0.000966479	0.0220015	6.46e-06	3.24e-05	0.00491292	0.00671402	3.24192e-05	4.4247e-05
1.9	0.5	-1	0.000948997	0.0223069	6.07e-06	3.29e-05	0.0049909	0.00678728	3.29185e-05	4.39389e-05
2	0.5	-1	0.000934744	0.0225883	5.68e-06	3.34e-05	0.00506711	0.00685338	3.33536e-05	4.36917e-05
1.2	0.5	0	0.00115683	0.0186821	8.92e-06	2.53e-05	0.00442756	0.0058099	2.52775e-05	4.82629e-05
1.3	0.5	0	0.00112206	0.0193239	8.54e-06	2.67e-05	0.00450131	0.00599184	2.67193e-05	4.74377e-05
1.4	0.5	0	0.00109437	0.0198452	8.18e-06	2.79e-05	0.00457329	0.00613594	2.78515e-05	4.68122e-05
1.5	0.5	0	0.0010701	0.0202984	7.81e-06	2.88e-05	0.00464551	0.00625831	2.87993e-05	4.62911e-05
1.6	0.5	0	0.001046	0.020717	7.43e-06	2.96e-05	0.00472048	0.00636876	2.96392e-05	4.58006e-05
1.7	0.5	0	0.00102574	0.0210882	7.06e-06	3.03e-05	0.00479442	0.00646445	3.03497e-05	4.54036e-05
1.8	0.5	0	0.00100734	0.0214317	6.68e-06	3.1e-05	0.0048688	0.00655109	3.09775e-05	4.5051e-05
1.9	0.5	0	0.000989242	0.0217584	6.3e-06	3.15e-05	0.00494502	0.00663181	3.15466e-05	4.47161e-05
2	0.5	0	0.000974447	0.0220572	5.92e-06	3.2e-05	0.00501946	0.00670412	3.20415e-05	4.44448e-05
1.2	0.5	1	0.00120604	0.0176046	9.1e-06	2.26e-05	0.00439213	0.00548262	2.25771e-05	4.96753e-05
1.3	0.5	1	0.00116958	0.0183818	8.73e-06	2.43e-05	0.00446425	0.00570813	2.43245e-05	4.87247e-05
1.4	0.5	1	0.00113952	0.0190141	8.37e-06	2.57e-05	0.00453537	0.0058878	2.57259e-05	4.79644e-05
1.5	0.5	1	0.0011125	0.0195557	8.01e-06	2.69e-05	0.00460735	0.00603834	2.68959e-05	4.73164e-05
1.6	0.5	1	0.001088	0.0200293	7.64e-06	2.79e-05	0.00468016	0.00616701	2.78845e-05	4.67611e-05
1.7	0.5	1	0.00106702	0.0204437	7.27e-06	2.87e-05	0.00475232	0.00627703	2.87155e-05	4.63042e-05
1.8	0.5	1	0.00104505	0.0208382	6.89e-06	2.95e-05	0.00482807	0.00637957	2.94757e-05	4.58524e-05
1.9	0.5	1	0.00102666	0.02119	6.51e-06	3.01e-05	0.00490236	0.00646896	3.0122e-05	4.5486e-05
2	0.5	1	0.00100989	0.0215174	6.14e-06	3.07e-05	0.00497693	0.00655048	3.06969e-05	4.51607e-05
1.2	0.5	2	0.00126639	0.0162315	9.32e-06	1.93e-05	0.00434868	0.0050639	1.9331e-05	5.14046e-05
1.3	0.5	2	0.00121832	0.0172691	8.92e-06	2.16e-05	0.00442623	0.00537077	2.16032e-05	5.01479e-05
1.4	0.5	2	0.00118293	0.0180541	8.56e-06	2.33e-05	0.0044989	0.00559861	2.33321e-05	4.9214e-05
1.5	0.5	2	0.00115336	0.0187034	8.19e-06	2.47e-05	0.00457057	0.00578353	2.47498e-05	4.84456e-05
1.6	0.5	2	0.00112594	0.0192736	7.82e-06	2.6e-05	0.00464374	0.00594277	2.59722e-05	4.77595e-05
1.7	0.5	2	0.00110676	0.0197269	7.48e-06	2.69e-05	0.00471179	0.00606645	2.69116e-05	4.72852e-05
1.8	0.5	2	0.00108405	0.0201735	7.1e-06	2.78e-05	0.00478595	0.00618607	2.78116e-05	4.67657e-05
1.9	0.5	2	0.00106462	0.0205669	6.73e-06	2.86e-05	0.00485909	0.00628907	2.8572e-05	4.6338e-05
2	0.5	2	0.00104665	0.0209286	6.36e-06	2.92e-05	0.00493282	0.00638182	2.92425e-05	4.59585e-05
1.2	0.5	3	0.00132823	0.0143313	9.54e-06	1.52e-05	0.00430415	0.00459492	1.51815e-05	5.34935e-05
1.3	0.5	3	0.00127847	0.0158274	9.16e-06	1.83e-05	0.00437931	0.00493171	1.82876e-05	5.19059e-05
1.4	0.5	3	0.00123527	0.0168627	8.78e-06	2.05e-05	0.00445493	0.00523836	2.05016e-05	5.07264e-05
1.5	0.5	3	0.00120066	0.0176581	8.41e-06	2.22e-05	0.00452801	0.00546952	2.22142e-05	4.98111e-05
1.6	0.5	3	0.00116749	0.0183667	8.02e-06	2.37e-05	0.00460385	0.005672	2.37383e-05	4.89499e-05
1.7	0.5	3	0.00114512	0.0189114	7.68e-06	2.49e-05	0.00467266	0.0058245	2.48887e-05	4.83567e-05
1.8	0.5	3	0.0011217	0.0194231	7.31e-06	2.59e-05	0.00474529	0.0059653	2.59493e-05	4.77672e-05
1.9	0.5	3	0.00110128	0.0198733	6.94e-06	2.69e-05	0.0048173	0.00608667	2.68552e-05	4.72673e-05
2	0.5	3	0.00107967	0.0203032	6.56e-06	2.77e-05	0.00489319	0.00620041	2.7694e-05	4.67689e-05
1.4	0.5	4	0.0012905	0.0153269	9.01e-06	1.71e-05	0.00440854	0.00477013	1.70668e-05	5.24867e-05
1.5	0.5	4	0.00124773	0.0164725	8.62e-06	1.95e-05	0.00448564	0.00511087	1.94655e-05	5.12189e-05
1.6	0.5	4	0.00121248	0.0173098	8.24e-06	2.12e-05	0.00456066	0.00535468	2.12331e-05	5.02704e-05
1.7	0.5	4	0.00118609	0.0179616	7.89e-06	2.26e-05	0.00463087	0.005541	2.26034e-05	4.95607e-05
1.8	0.5	4	0.00116048	0.0185548	7.52e-06	2.38e-05	0.0047034	0.00570784	2.38406e-05	4.88905e-05
1.9	0.5	4	0.00113676	0.0190914	7.15e-06	2.49e-05	0.00477685	0.00585629	2.49442e-05	4.82756e-05
2	0.5	4	0.00111657	0.0195593	6.78e-06	2.59e-05	0.00484891	0.00598327	2.58827e-05	4.77606e-05
1.5	0.5	5	0.00130346	0.0146658	8.88e-06	1.56e-05	0.00443549	0.00481381	1.55572e-05	5.32042e-05
1.6	0.5	5	0.0012653	0.0159239	8.5e-06	1.81e-05	0.00450995	0.00493792	1.81185e-05	5.19057e-05
1.7	0.5	5	0.00123018	0.016855	8.12e-06	2e-05	0.00458589	0.00520883	2.00498e-05	5.08838e-05
1.8	0.5	5	0.00119907	0.0175965	7.73e-06	2.16e-05	0.00466173	0.00542183	2.1586e-05	5.00479e-05
1.9	0.5	5	0.00117117	0.0182333	7.35e-06	2.29e-05	0.00473762	0.00560153	2.28956e-05	4.93184e-05
2	0.5	5	0.00115228	0.0187317	7e-06	2.39e-05	0.00480607	0.00573952	2.39014e-05	4.8807e-05
1.7	0.5	6	0.00127787	0.0153182	8.36e-06	1.67e-05	0.00453725	0.00498342	1.66918e-05	5.25724e-05
1.8	0.5	6	0.00124344	0.0163839	7.97e-06	1.89e-05	0.0046138	0.005111	1.8859e-05	5.14476e-05
1.9	0.5	6	0.00121194	0.0172032	7.58e-06	2.05e-05	0.00469115	0.00529458	2.05343e-05	5.0545e-05
2	0.5	6	0.00118954	0.0178034	7.23e-06	2.17e-05	0.00476136	0.00546445	2.17458e-05	4.99265e-05
1.9	0.5	7	0.00126152	0.0156917	7.87e-06	1.72e-05	0.00463462	0.0051457	1.72411e-05	5.22557e-05
2	0.5	7	0.00123025	0.0166528	7.47e-06	1.92e-05	0.00471249	0.00527549	1.91754e-05	5.12395e-05
1.2	1	-5	0.000886869	0.0224684	7.93e-06	3.54e-05	0.00462193	0.00693375	3.54208e-05	4.26552e-05
1.3	1	-5	0.000865379	0.022789	7.53e-06	3.6e-05	0.00470152	0.00701091	3.59741e-05	4.23215e-05
1.4	1	-5	0.000849423	0.0230833	7.14e-06	3.65e-05	0.00477904	0.00708021	3.64534e-05	4.2085e-05
1.5	1	-5	0.000832065	0.0233699	6.73e-06	3.69e-05	0.00485974	0.00714603	3.6887e-05	4.18331e-05
1.6	1	-5	0.000815553	0.0236472	6.31e-06	3.73e-05	0.00494171	0.0072084	3.72807e-05	4.15982e-05
1.7	1	-5	0.000800584	0.0239126	5.9e-06	3.76e-05	0.00502408	0.00726682	3.76317e-05	4.13952e-05
1.8	1	-5	0.000786791	0.0241698	5.48e-06	3.8e-05	0.00510699	0.00732239	3.79508e-05	4.12128e-05
1.9	1	-5	0.000772665	0.0244222	5.05e-06	3.82e-05	0.00519192	0.00737578	3.824e-05	4.10306e-05
2	1	-5	0.000761097	0.0246646	4.62e-06	3.85e-05	0.00527548	0.00742636	3.85035e-05	4.08899e-05
1.2	1	-4	0.000943115	0.0218303	8.14e-06	3.37e-05	0.00458144	0.00674757	3.36578e-05	4.36475e-05
1.3	1	-4	0.000920923	0.022176	7.75e-06	3.43e-05	0.0046582	0.00683381	3.43031e-05	4.32703e-05
1.4	1	-4	0.000900896	0.0224967	7.36e-06	3.49e-05	0.00473581	0.00691178	3.48645e-05	4.29386e-05
1.5	1	-4	0.000884308	0.0227931	6.97e-06	3.54e-05	0.00481272	0.00698217	3.5352e-05	4.26739e-05
1.6	1	-4	0.000868228	0.0230776	6.57e-06	3.58e-05	0.00489114	0.00704821	3.57911e-05	4.24234e-05
1.7	1	-4	0.000853384	0.0233509	6.17e-06	3.62e-05	0.00497023	0.00711044	3.61893e-05	4.2197e-05
1.8	1	-4	0.000837792	0.0236196	5.76e-06	3.66e-05	0.0050519	0.00717032	3.65553e-05	4.19639e-05
1.9	1	-4	0.000826025	0.0238725	5.36e-06	3.69e-05	0.00513109	0.00722589	3.68843e-05	4.1795e-05
2	1	-4	0.000813435	0.0241242	4.94e-06	3.72e-05	0.00521268	0.00728024	3.71928e-05	4.16147e-05
1.2	1	-3	0.000994397	0.0211732	8.33e-06	3.19e-05	0.00454451	0.006554	3.18526e-05	4.46258e-05
1.3	1	-3	0.000971432	0.0215542	7.95e-06	3.26e-05	0.0046188	0.00665244	3.26135e-05	4.42096e-05
1.4	1	-3	0.000950106	0.0219048	7.57e-06	3.33e-05	0.00469447	0.00674073	3.32744e-05	4.3832e-05
1.5	1	-3	0.000929427	0.0222335	7.17e-06	3.39e-05	0.00477212	0.00682135	3.3856e-05	4.34775e-05
1.6	1	-3	0.00091355	0.0225314	6.79e-06	3.44e-05	0.00484763	0.00689281	3.43535e-05	4.32099e-05
1.7	1	-3	0.000896298	0.0228234	6.39e-06	3.48e-05	0.00492646	0.00696128	3.48121e-05	4.29244e-05
1.8	1	-3	0.000883003	0.0230926	6e-06	3.52e-05	0.00500308	0.00702313	3.52108e-05	4.27128e-05
1.9	1	-3	0.00086829	0.0233604	5.6e-06	3.56e-05	0.00508291	0.0070835	3.55849e-05	4.24795e-05
2	1	-3	0.000857527	0.0236103	5.21e-06	3.59e-05	0.00515977	0.007139	3.59183e-05	4.23133e-05
1.2	1	-2	0.00105041	0.0204405	8.53e-06	2.99e-05	0.00450419	0.00633733	2.98822e-05	4.57483e-05
1.3	1	-2	0.00102188	0.0208882	8.15e-06	3.08e-05	0.00457946	0.00645687	3.08253e-05	4.52001e-05
1.4	1	-2	0.000997225	0.0212858	7.77e-06	3.16e-05	0.00465489	0.00656036	3.16215e-05	4.47396e-05
1.5	1	-2	0.000975079	0.0216473	7.38e-06	3.23e-05	0.00473103	0.00665206	3.23064e-05	4.4338e-05
1.6	1	-2	0.00095714	0.0219731	7e-06	3.29e-05	0.00480579	0.00673275	3.28903e-05	4.40183e-05
1.7	1	-2	0.000939935	0.0222814	6.62e-06	3.34e-05	0.00488195	0.00680742	3.34128e-05	4.37181e-05
1.8	1	-2	0.000924116	0.0225731	6.23e-06	3.39e-05	0.00495868	0.00687658	3.38801e-05	4.34468e-05
1.9	1	-2	0.000909021	0.0228522	5.83e-06	3.43e-05	0.00503648	0.00694136	3.43015e-05	4.31947e-05
2	1	-2	0.000897512	0.0231109	5.45e-06	3.47e-05	0.00511179	0.00700034	3.46723e-05	4.30054e-05
1.2	1	-1	0.00110396	0.0196423	8.72e-06	2.78e-05	0.00446563	0.00609922	2.77686e-05	4.69219e-05
1.3	1	-1	0.00107076	0.0201737	8.34e-06	2.89e-05	0.00454132	0.00624541	2.89315e-05	4.62283e-05
1.4	1	-1	0.00104545	0.0206151	7.97e-06	2.99e-05	0.00461438	0.00636371	2.98549e-05	4.57196e-05
1.5	1	-1	0.00102112	0.0210205	7.59e-06	3.07e-05	0.00468959	0.00646983	3.06661e-05	4.5249e-05
1.6	1	-1	0.00100116	0.0213805	7.22e-06	3.14e-05	0.00476353	0.00656184	3.13513e-05	4.48729e-05
1.7	1	-1	0.000981871	0.0217194	6.83e-06	3.2e-05	0.00483917	0.00664655	3.1965e-05	4.45186e-05
1.8	1	-1	0.000963777	0.022038	6.45e-06	3.25e-05	0.00491584	0.00672443	3.2512e-05	4.41942e-05
1.9	1	-1	0.000948289	0.0223334	6.06e-06	3.3e-05	0.00499171	0.00679512	3.29924e-05	4.39213e-05
2	1	-1	0.000933949	0.0226144	5.67e-06	3.34e-05	0.00506806	0.00686104	3.34256e-05	4.36733e-05
1.2	1	0	0.00115246	0.0187511	8.9e-06	2.55e-05	0.00443071	0.00583065	2.54516e-05	4.81535e-05
1.3	1	0	0.00112011	0.0193683	8.54e-06	2.68e-05	0.00450283	0.00600521	2.68353e-05	4.7384e-05
1.4	1	0	0.00109226	0.0198865	8.17e-06	2.8e-05	0.00457506	0.00614829	2.79596e-05	4.67594e-05
1.5	1	0	0.00106785	0.0203375	7.8e-06	2.89e-05	0.00464754	0.00626986	2.89008e-05	4.62393e-05
1.6	1	0	0.00104361	0.0207541	7.42e-06	2.97e-05	0.00472277	0.00637963	2.97348e-05	4.57502e-05
1.7	1	0	0.00102324	0.021125	7.05e-06	3.04e-05	0.00479698	0.00647507	3.04431e-05	4.53505e-05
1.8	1	0	0.00100472	0.021467	6.67e-06	3.11e-05	0.00487162	0.0065612	3.10659e-05	4.49992e-05
1.9	1	0	0.000986191	0.0217949	6.28e-06	3.16e-05	0.0049485	0.00664206	3.16351e-05	4.46572e-05
2	1	0	0.000971303	0.0220927	5.9e-06	3.21e-05	0.00502324	0.00671397	3.21258e-05	4.43868e-05
1.2	1	1	0.00120404	0.0176598	9.09e-06	2.27e-05	0.00439357	0.00549949	2.27135e-05	4.96114e-05
1.3	1	1	0.0011674	0.0184325	8.72e-06	2.45e-05	0.00446595	0.00572348	2.4452e-05	4.86612e-05
1.4	1	1	0.0011372	0.0190611	8.36e-06	2.58e-05	0.00453732	0.00590189	2.5845e-05	4.79011e-05
1.5	1	1	0.00111005	0.0195991	8e-06	2.7e-05	0.00460955	0.00605124	2.70059e-05	4.7255e-05
1.6	1	1	0.00108543	0.0200702	7.63e-06	2.8e-05	0.00468263	0.00617901	2.79874e-05	4.67005e-05
1.7	1	1	0.00106434	0.0204825	7.26e-06	2.88e-05	0.00475505	0.00628827	2.88119e-05	4.62455e-05
1.8	1	1	0.00104226	0.0208758	6.87e-06	2.96e-05	0.00483108	0.00639035	2.9568e-05	4.57931e-05
1.9	1	1	0.00102378	0.0212262	6.5e-06	3.02e-05	0.00490565	0.00647922	3.02095e-05	4.54279e-05
2	1	1	0.00100965	0.0215372	6.13e-06	3.08e-05	0.00497722	0.00655645	3.07521e-05	4.51516e-05
1.2	1	2	0.00126341	0.0163049	9.31e-06	1.95e-05	0.00435083	0.00508636	1.94993e-05	5.1316e-05
1.3	1	2	0.00121515	0.0173348	8.91e-06	2.18e-05	0.0044287	0.00539068	2.17591e-05	5.00597e-05
1.4	1	2	0.00118046	0.0181069	8.55e-06	2.35e-05	0.00450097	0.00561455	2.3461e-05	4.91444e-05
1.5	1	2	0.00115077	0.0187531	8.18e-06	2.49e-05	0.0045729	0.00579837	2.48721e-05	4.83754e-05
1.6	1	2	0.00112825	0.0192776	7.83e-06	2.6e-05	0.00464152	0.00594452	2.59924e-05	4.77965e-05
1.7	1	2	0.00110396	0.0197711	7.46e-06	2.7e-05	0.00471464	0.00607936	2.70199e-05	4.72157e-05
1.8	1	2	0.00108372	0.0201962	7.1e-06	2.79e-05	0.00478631	0.00619293	2.78725e-05	4.67501e-05
1.9	1	2	0.00106164	0.0206065	6.72e-06	2.87e-05	0.00486248	0.00630038	2.86668e-05	4.62726e-05
2	1	2	0.0010436	0.0209668	6.34e-06	2.93e-05	0.00493649	0.00639258	2.93323e-05	4.58941e-05
1.2	1	3	0.00133055	0.0143345	9.55e-06	1.52e-05	0.00430248	0.00459214	1.51925e-05	5.35325e-05
1.3	1	3	0.00127525	0.0159085	9.15e-06	1.85e-05	0.00438182	0.00495648	1.84678e-05	5.1809e-05
1.4	1	3	0.0012319	0.0169316	8.76e-06	2.07e-05	0.00445776	0.00525915	2.06597e-05	5.06341e-05
1.5	1	3	0.00119715	0.0177224	8.39e-06	2.24e-05	0.00453116	0.00548874	2.23647e-05	4.97179e-05
1.6	1	3	0.00116471	0.0184188	8.01e-06	2.39e-05	0.00460652	0.00568747	2.38627e-05	4.88754e-05
1.7	1	3	0.00114225	0.0189611	7.66e-06	2.5e-05	0.00467558	0.00583914	2.50079e-05	4.82813e-05
1.8	1	3	0.00111874	0.0194703	7.29e-06	2.61e-05	0.00474848	0.00597903	2.6062e-05	4.76928e-05
1.9	1	3	0.00109825	0.0199182	6.93e-06	2.7e-05	0.00482076	0.00609962	2.69618e-05	4.71935e-05
2	1	3	0.00108156	0.0203061	6.57e-06	2.77e-05	0.00489093	0.00620182	2.77117e-05	4.67988e-05
1.4	1	4	0.00128711	0.0154233	9e-06	1.73e-05	0.00441139	0.00479959	1.72741e-05	5.23729e-05
1.5	1	4	0.00124421	0.0165473	8.61e-06	1.96e-05	0.00448881	0.00513343	1.96325e-05	5.11199e-05
1.6	1	4	0.00120885	0.0173766	8.23e-06	2.14e-05	0.00456415	0.00537463	2.13853e-05	5.01743e-05
1.7	1	4	0.00118236	0.0180249	7.87e-06	2.27e-05	0.00463468	0.00555972	2.27492e-05	4.94651e-05
1.8	1	4	0.00115749	0.0186074	7.5e-06	2.4e-05	0.00470663	0.00572333	2.39637e-05	4.88101e-05
1.9	1	4	0.00113369	0.0191415	7.13e-06	2.51e-05	0.00478035	0.00587087	2.50613e-05	4.81965e-05
2	1	4	0.00111344	0.0196072	6.77e-06	2.6e-05	0.00485268	0.00599706	2.59941e-05	4.76826e-05
1.5	1	5	0.00129995	0.0147832	8.86e-06	1.58e-05	0.00443864	0.00481907	1.57991e-05	5.30732e-05
1.6	1	5	0.00126169	0.0160129	8.48e-06	1.83e-05	0.00451342	0.0049628	1.83112e-05	5.17938e-05
1.7	1	5	0.00122647	0.0169284	8.1e-06	2.02e-05	0.00458968	0.00523073	2.02123e-05	5.0782e-05
1.8	1	5	0.00119526	0.0176629	7.71e-06	2.17e-05	0.00466584	0.00544143	2.17349e-05	4.99492e-05
1.9	1	5	0.0011727	0.0182353	7.36e-06	2.29e-05	0.00473588	0.00560252	2.2907e-05	4.93431e-05
2	1	5	0.00114913	0.0187842	6.98e-06	2.4e-05	0.00480984	0.00575475	2.40209e-05	4.87261e-05
1.7	1	6	0.00127418	0.0154258	8.34e-06	1.69e-05	0.00454101	0.00498969	1.69167e-05	5.24454e-05
1.8	1	6	0.00124487	0.0163856	7.98e-06	1.89e-05	0.00461226	0.00510844	1.88677e-05	5.1471e-05
1.9	1	6	0.00121333	0.0172048	7.59e-06	2.05e-05	0.00468957	0.00529541	2.05434e-05	5.05675e-05
2	1	6	0.00118561	0.0178704	7.2e-06	2.19e-05	0.00476607	0.00548401	2.18932e-05	4.98259e-05
1.9	1	7	0.00125771	0.0157976	7.85e-06	1.75e-05	0.00463897	0.00515294	1.74622e-05	5.21269e-05
2	1	7	0.00122637	0.0167387	7.45e-06	1.94e-05	0.00471715	0.00528326	1.93593e-05	5.11244e-05
1.2	1.5	-5	0.000882568	0.0225124	7.92e-06	3.55e-05	0.00462503	0.00694647	3.55417e-05	4.25835e-05
1.3	1.5	-5	0.000863453	0.0228262	7.52e-06	3.61e-05	0.00470303	0.00702193	3.60828e-05	4.22908e-05
1.4	1.5	-5	0.000844528	0.0231273	7.12e-06	3.66e-05	0.00478316	0.00709256	3.65682e-05	4.20069e-05
1.5	1.5	-5	0.000826902	0.0234139	6.71e-06	3.7e-05	0.00486439	0.0071582	3.69985e-05	4.17525e-05
1.6	1.5	-5	0.000810146	0.0236898	6.29e-06	3.74e-05	0.0049469	0.00721996	3.73844e-05	4.15192e-05
1.7	1.5	-5	0.000795424	0.0239546	5.87e-06	3.77e-05	0.00502935	0.00727813	3.77326e-05	4.13211e-05
1.8	1.5	-5	0.000782378	0.024209	5.45e-06	3.8e-05	0.00511175	0.00733295	3.80455e-05	4.11529e-05
1.9	1.5	-5	0.000768065	0.0244621	5.02e-06	3.83e-05	0.00519717	0.0073864	3.83338e-05	4.09677e-05
2	1.5	-5	0.000756332	0.0247035	4.6e-06	3.86e-05	0.0052812	0.00743654	3.85912e-05	4.08277e-05
1.2	1.5	-4	0.000940455	0.0218654	8.13e-06	3.38e-05	0.00458335	0.00675789	3.37554e-05	4.35968e-05
1.3	1.5	-4	0.000918039	0.0222095	7.74e-06	3.44e-05	0.00466045	0.00684356	3.43946e-05	4.32194e-05
1.4	1.5	-4	0.000897811	0.0225295	7.34e-06	3.5e-05	0.0047384	0.00692116	3.49517e-05	4.28863e-05
1.5	1.5	-4	0.000881044	0.0228256	6.95e-06	3.54e-05	0.00481566	0.00699134	3.54363e-05	4.262e-05
1.6	1.5	-4	0.0008648	0.0231104	6.55e-06	3.59e-05	0.00489443	0.00705735	3.58743e-05	4.23669e-05
1.7	1.5	-4	0.000849803	0.0233837	6.15e-06	3.63e-05	0.00497388	0.00711945	3.62702e-05	4.21392e-05
1.8	1.5	-4	0.000836658	0.0236455	5.75e-06	3.66e-05	0.00505313	0.00717785	3.66285e-05	4.19454e-05
1.9	1.5	-4	0.000822165	0.0239056	5.33e-06	3.7e-05	0.00513549	0.00723472	3.69612e-05	4.1735e-05
2	1.5	-4	0.000809452	0.0241569	4.92e-06	3.73e-05	0.00521746	0.00728884	3.72662e-05	4.15551e-05
1.2	1.5	-3	0.000993439	0.0211996	8.32e-06	3.19e-05	0.0045452	0.006562	3.19286e-05	4.46031e-05
1.3	1.5	-3	0.000968064	0.0215885	7.94e-06	3.27e-05	0.00462143	0.00666234	3.27034e-05	4.41458e-05
1.4	1.5	-3	0.000948858	0.0219293	7.56e-06	3.33e-05	0.00469552	0.00674799	3.33432e-05	4.38078e-05
1.5	1.5	-3	0.000928046	0.0222576	7.17e-06	3.39e-05	0.00477336	0.00682843	3.39228e-05	4.34511e-05
1.6	1.5	-3	0.000909713	0.0225636	6.77e-06	3.44e-05	0.00485132	0.00690168	3.44315e-05	4.31416e-05
1.7	1.5	-3	0.000894699	0.0228466	6.38e-06	3.49e-05	0.00492809	0.00696792	3.48739e-05	4.28966e-05
1.8	1.5	-3	0.000881308	0.023116	5.99e-06	3.53e-05	0.00500491	0.00702975	3.52719e-05	4.26832e-05
1.9	1.5	-3	0.000866502	0.023384	5.59e-06	3.56e-05	0.00508495	0.0070901	3.56453e-05	4.24484e-05
2	1.5	-3	0.000855662	0.0236336	5.2e-06	3.6e-05	0.00516201	0.00714543	3.59765e-05	4.22827e-05
1.2	1.5	-2	0.00104732	0.0204755	8.52e-06	3e-05	0.00450641	0.00634761	2.99737e-05	4.56869e-05
1.3	1.5	-2	0.00102038	0.0209139	8.14e-06	3.09e-05	0.00458063	0.00646452	3.08953e-05	4.51686e-05
1.4	1.5	-2	0.0009956	0.0213105	7.76e-06	3.17e-05	0.00465626	0.00656759	3.16877e-05	4.47074e-05
1.5	1.5	-2	0.000973339	0.0216715	7.37e-06	3.24e-05	0.0047326	0.00665907	3.23703e-05	4.43043e-05
1.6	1.5	-2	0.000955302	0.0219968	6.99e-06	3.3e-05	0.00480755	0.00673956	3.2952e-05	4.39831e-05
1.7	1.5	-2	0.000938005	0.0223046	6.61e-06	3.35e-05	0.00488391	0.006814	3.34719e-05	4.36825e-05
1.8	1.5	-2	0.0009221	0.0225955	6.22e-06	3.39e-05	0.00496085	0.00688282	3.39356e-05	4.34118e-05
1.9	1.5	-2	0.000906927	0.0228749	5.82e-06	3.44e-05	0.00503886	0.00694763	3.43567e-05	4.31574e-05
2	1.5	-2	0.000895351	0.0231335	5.44e-06	3.47e-05	0.00511438	0.0070065	3.4726e-05	4.29674e-05
1.2	1.5	-1	0.00110073	0.0196806	8.71e-06	2.79e-05	0.00446795	0.00611053	2.78663e-05	4.68528e-05
1.3	1.5	-1	0.00107018	0.0201939	8.34e-06	2.9e-05	0.00454178	0.00625153	2.89871e-05	4.62126e-05
1.4	1.5	-1	0.00104193	0.0206495	7.96e-06	2.99e-05	0.00461734	0.0063736	2.99404e-05	4.56508e-05
1.5	1.5	-1	0.00102036	0.0210399	7.59e-06	3.07e-05	0.00469028	0.00647562	3.07192e-05	4.523e-05
1.6	1.5	-1	0.000999119	0.0214051	7.21e-06	3.14e-05	0.00476549	0.00656889	3.14136e-05	4.48321e-05
1.7	1.5	-1	0.000979752	0.0217428	6.82e-06	3.2e-05	0.00484133	0.00665314	3.20227e-05	4.44795e-05
1.8	1.5	-1	0.000963677	0.0220516	6.44e-06	3.26e-05	0.00491595	0.00672853	3.25514e-05	4.41901e-05
1.9	1.5	-1	0.00094602	0.022356	6.05e-06	3.3e-05	0.0049943	0.00680133	3.30457e-05	4.38812e-05
2	1.5	-1	0.000931617	0.0226368	5.66e-06	3.35e-05	0.00507086	0.00686712	3.34772e-05	4.36321e-05
1.2	1.5	0	0.00115177	0.0187756	8.9e-06	2.55e-05	0.0044312	0.00583813	2.55159e-05	4.81295e-05
1.3	1.5	0	0.00111667	0.0194094	8.52e-06	2.69e-05	0.00450552	0.00601734	2.69377e-05	4.73059e-05
1.4	1.5	0	0.0010887	0.0199243	8.16e-06	2.81e-05	0.00457806	0.00615926	2.80524e-05	4.66847e-05
1.5	1.5	0	0.00106417	0.0203735	7.79e-06	2.9e-05	0.00465085	0.00628015	2.89877e-05	4.6165e-05
1.6	1.5	0	0.00104259	0.020773	7.42e-06	2.98e-05	0.00472375	0.00638519	2.97842e-05	4.57275e-05
1.7	1.5	0	0.00102216	0.021143	7.04e-06	3.05e-05	0.00479808	0.00648032	3.04897e-05	4.53289e-05
1.8	1.5	0	0.00100358	0.0214852	6.66e-06	3.11e-05	0.00487285	0.00656645	3.11125e-05	4.49754e-05
1.9	1.5	0	0.00098583	0.0218086	6.28e-06	3.17e-05	0.00494891	0.00664612	3.16727e-05	4.46474e-05
2	1.5	0	0.000970902	0.0221063	5.9e-06	3.22e-05	0.00502372	0.00671797	3.21628e-05	4.43764e-05
1.2	1.5	1	0.00120071	0.0177125	9.08e-06	2.28e-05	0.00439596	0.00551539	2.28404e-05	4.95255e-05
1.3	1.5	1	0.00116395	0.018481	8.71e-06	2.46e-05	0.00446864	0.00573794	2.45702e-05	4.85753e-05
1.4	1.5	1	0.00113363	0.0191053	8.35e-06	2.6e-05	0.00454031	0.00591488	2.59524e-05	4.78181e-05
1.5	1.5	1	0.00110638	0.0196401	7.98e-06	2.71e-05	0.00461286	0.00606311	2.71045e-05	4.7174e-05
1.6	1.5	1	0.00108429	0.0200909	7.62e-06	2.8e-05	0.00468372	0.00618511	2.80401e-05	4.66729e-05
1.7	1.5	1	0.00106049	0.0205192	7.24e-06	2.89e-05	0.00475898	0.00629861	2.88973e-05	4.6167e-05
1.8	1.5	1	0.00104369	0.0208784	6.88e-06	2.96e-05	0.00482953	0.00639152	2.95826e-05	4.58158e-05
1.9	1.5	1	0.00102519	0.0212287	6.5e-06	3.02e-05	0.00490405	0.00648037	3.02242e-05	4.545e-05
2	1.5	1	0.00100558	0.0215711	6.11e-06	3.08e-05	0.0049821	0.00656554	3.08251e-05	4.50749e-05
1.2	1.5	2	0.00125926	0.0163752	9.29e-06	1.97e-05	0.00435381	0.00510765	1.96579e-05	5.12105e-05
1.3	1.5	2	0.00121654	0.0173372	8.92e-06	2.18e-05	0.00442762	0.00539166	2.1769e-05	5.00825e-05
1.4	1.5	2	0.00118181	0.0181093	8.55e-06	2.35e-05	0.00449984	0.00561553	2.34715e-05	4.91663e-05
1.5	1.5	2	0.00115209	0.0187554	8.19e-06	2.49e-05	0.00457172	0.00579936	2.48831e-05	4.83965e-05
1.6	1.5	2	0.00112452	0.0193223	7.82e-06	2.61e-05	0.0046451	0.00595747	2.60979e-05	4.77104e-05
1.7	1.5	2	0.00110015	0.019813	7.44e-06	2.71e-05	0.00471853	0.00609134	2.71177e-05	4.71314e-05
1.8	1.5	2	0.00107983	0.0202362	7.08e-06	2.8e-05	0.0047905	0.00620419	2.79642e-05	4.66663e-05
1.9	1.5	2	0.00106286	0.0206086	6.72e-06	2.87e-05	0.0048611	0.00630134	2.86788e-05	4.62919e-05
2	1.5	2	0.00104479	0.0209688	6.35e-06	2.93e-05	0.00493505	0.00639352	2.93444e-05	4.5913e-05
1.2	1.5	3	0.00132647	0.014447	9.54e-06	1.54e-05	0.00430542	0.00459703	1.54242e-05	5.33972e-05
1.3	1.5	3	0.00127104	0.015987	9.13e-06	1.86e-05	0.00438511	0.00498027	1.86404e-05	5.16945e-05
1.4	1.5	3	0.0012331	0.0169335	8.77e-06	2.07e-05	0.00445676	0.00525996	2.06678e-05	5.06537e-05
1.5	1.5	3	0.00119369	0.0177743	8.38e-06	2.25e-05	0.00453428	0.00550412	2.24844e-05	4.96317e-05
1.6	1.5	3	0.00116584	0.0184206	8.02e-06	2.39e-05	0.00460543	0.00568827	2.38715e-05	4.88935e-05
1.7	1.5	3	0.00113849	0.0190094	7.64e-06	2.51e-05	0.00467942	0.00585314	2.51199e-05	4.81907e-05
1.8	1.5	3	0.00111983	0.019472	7.3e-06	2.61e-05	0.00474731	0.00597983	2.60715e-05	4.77101e-05
1.9	1.5	3	0.00109931	0.0199198	6.93e-06	2.7e-05	0.00481954	0.00610039	2.69714e-05	4.72104e-05
2	1.5	3	0.00107761	0.0203475	6.55e-06	2.78e-05	0.00489567	0.00621333	2.78038e-05	4.67132e-05
1.4	1.5	4	0.00128819	0.0154248	9e-06	1.73e-05	0.00441048	0.00480021	1.72799e-05	5.23908e-05
1.5	1.5	4	0.00124525	0.0165488	8.61e-06	1.96e-05	0.00448787	0.00513409	1.96391e-05	5.11371e-05
1.6	1.5	4	0.00120986	0.017378	8.23e-06	2.14e-05	0.00456318	0.00537527	2.13922e-05	5.01908e-05
1.7	1.5	4	0.00118334	0.0180264	7.87e-06	2.28e-05	0.00463367	0.00556039	2.27566e-05	4.94811e-05
1.8	1.5	4	0.00115372	0.018658	7.48e-06	2.41e-05	0.0047107	0.00573797	2.40783e-05	4.87203e-05
1.9	1.5	4	0.00113464	0.0191429	7.14e-06	2.51e-05	0.00477927	0.00587154	2.50692e-05	4.82115e-05
2	1.5	4	0.00111436	0.0196084	6.77e-06	2.6e-05	0.00485156	0.00599771	2.60021e-05	4.76974e-05
1.5	1.5	5	0.00130089	0.0147844	8.87e-06	1.58e-05	0.0044378	0.00481766	1.58038e-05	5.30889e-05
1.6	1.5	5	0.0012626	0.0160142	8.49e-06	1.83e-05	0.00451254	0.00496335	1.83166e-05	5.18089e-05
1.7	1.5	5	0.00122735	0.0169297	8.1e-06	2.02e-05	0.00458878	0.00523131	2.02183e-05	5.07967e-05
1.8	1.5	5	0.00119612	0.0176641	7.72e-06	2.17e-05	0.00466491	0.00544199	2.17411e-05	4.99632e-05
1.9	1.5	5	0.00117355	0.0182365	7.36e-06	2.29e-05	0.00473492	0.00560308	2.29134e-05	4.93569e-05
2	1.5	5	0.00114996	0.0187853	6.99e-06	2.4e-05	0.00480884	0.00575532	2.40277e-05	4.87396e-05
1.7	1.5	6	0.00127499	0.0154268	8.35e-06	1.69e-05	0.00454019	0.00498832	1.69211e-05	5.24588e-05
1.8	1.5	6	0.00124045	0.0164704	7.96e-06	1.9e-05	0.00461703	0.00511639	1.90487e-05	5.13474e-05
1.9	1.5	6	0.0012141	0.0172057	7.6e-06	2.05e-05	0.00468869	0.00529587	2.05485e-05	5.05801e-05
2	1.5	6	0.00118636	0.0178713	7.21e-06	2.19e-05	0.00476517	0.00548448	2.18986e-05	4.9838e-05
1.9	1.5	7	0.00125842	0.0157983	7.85e-06	1.75e-05	0.00463816	0.0051516	1.7466e-05	5.21385e-05
2	1.5	7	0.00122706	0.0167394	7.46e-06	1.94e-05	0.00471633	0.00528188	1.93635e-05	5.11356e-05
1.2	2	-5	0.000881143	0.0225227	7.91e-06	3.56e-05	0.00462606	0.00694937	3.55683e-05	4.25592e-05
1.3	2	-5	0.000861957	0.0228364	7.52e-06	3.61e-05	0.00470419	0.00702474	3.61082e-05	4.22659e-05
1.4	2	-5	0.000842968	0.0231366	7.11e-06	3.66e-05	0.00478447	0.00709506	3.659e-05	4.19838e-05
1.5	2	-5	0.000825282	0.0234231	6.7e-06	3.7e-05	0.00486585	0.00716061	3.7019e-05	4.17293e-05
1.6	2	-5	0.00081128	0.0236931	6.29e-06	3.74e-05	0.00494581	0.00722128	3.74014e-05	4.15379e-05
1.7	2	-5	0.000796539	0.0239578	5.88e-06	3.77e-05	0.00502821	0.00727943	3.77496e-05	4.13397e-05
1.8	2	-5	0.0007818	0.024216	5.45e-06	3.81e-05	0.00511238	0.00733491	3.80638e-05	4.11455e-05
1.9	2	-5	0.00076914	0.0244652	5.03e-06	3.84e-05	0.00519594	0.00738767	3.83508e-05	4.09859e-05
2	2	-5	0.000757392	0.0247066	4.6e-06	3.86e-05	0.00527993	0.00743781	3.86084e-05	4.08458e-05
1.2	2	-4	0.000938934	0.0218749	8.12e-06	3.38e-05	0.00458445	0.00676055	3.37789e-05	4.35711e-05
1.3	2	-4	0.000918908	0.0222119	7.74e-06	3.44e-05	0.00465977	0.00684446	3.44056e-05	4.32333e-05
1.4	2	-4	0.000898662	0.0225318	7.35e-06	3.5e-05	0.00473768	0.00692207	3.49629e-05	4.29001e-05
1.5	2	-4	0.000881878	0.0228279	6.96e-06	3.54e-05	0.00481491	0.00699223	3.54475e-05	4.26334e-05
1.6	2	-4	0.000865619	0.0231126	6.56e-06	3.59e-05	0.00489365	0.00705824	3.58856e-05	4.23802e-05
1.7	2	-4	0.000848032	0.0233931	6.14e-06	3.63e-05	0.00497569	0.00712184	3.62891e-05	4.21106e-05
1.8	2	-4	0.000834849	0.0236545	5.74e-06	3.66e-05	0.00505508	0.00718007	3.66453e-05	4.19178e-05
1.9	2	-4	0.000822944	0.0239076	5.34e-06	3.7e-05	0.0051346	0.00723557	3.69725e-05	4.17478e-05
2	2	-4	0.000810218	0.0241588	4.92e-06	3.73e-05	0.00521654	0.00728967	3.72775e-05	4.15678e-05
1.2	2	-3	0.000994118	0.0212014	8.32e-06	3.19e-05	0.00454472	0.00656267	3.19364e-05	4.46141e-05
1.3	2	-3	0.000968725	0.0215901	7.94e-06	3.27e-05	0.00462091	0.00666299	3.27112e-05	4.41562e-05
1.4	2	-3	0.000947213	0.0219391	7.55e-06	3.34e-05	0.0046969	0.00675063	3.33655e-05	4.37791e-05
1.5	2	-3	0.000928679	0.0222592	7.17e-06	3.39e-05	0.00477279	0.00682906	3.39307e-05	4.34613e-05
1.6	2	-3	0.000910335	0.0225651	6.77e-06	3.44e-05	0.00485072	0.0069023	3.44394e-05	4.31516e-05
1.7	2	-3	0.000895309	0.0228481	6.39e-06	3.49e-05	0.00492746	0.00696854	3.48819e-05	4.29064e-05
1.8	2	-3	0.000879513	0.0231253	5.98e-06	3.53e-05	0.00500685	0.00703209	3.52898e-05	4.26531e-05
1.9	2	-3	0.000867094	0.0233854	5.59e-06	3.57e-05	0.00508427	0.00709071	3.56534e-05	4.24579e-05
2	2	-3	0.000853809	0.0236427	5.19e-06	3.6e-05	0.00516423	0.00714761	3.59919e-05	4.22531e-05
1.2	2	-2	0.00104787	0.0204768	8.52e-06	3e-05	0.00450602	0.00634811	2.99794e-05	4.56956e-05
1.3	2	-2	0.0010209	0.0209151	8.14e-06	3.09e-05	0.00458022	0.006465	3.0901e-05	4.5177e-05
1.4	2	-2	0.000996113	0.0213117	7.76e-06	3.17e-05	0.00465582	0.00656809	3.16936e-05	4.47156e-05
1.5	2	-2	0.000973841	0.0216726	7.38e-06	3.24e-05	0.00473214	0.00665954	3.23761e-05	4.43122e-05
1.6	2	-2	0.000953606	0.0220071	6.99e-06	3.3e-05	0.00480918	0.00674229	3.29743e-05	4.39524e-05
1.7	2	-2	0.000936277	0.0223147	6.6e-06	3.35e-05	0.00488568	0.00681664	3.3493e-05	4.36515e-05
1.8	2	-2	0.000922575	0.0225965	6.22e-06	3.39e-05	0.00496034	0.00688329	3.39416e-05	4.34194e-05
1.9	2	-2	0.000907394	0.0228759	5.83e-06	3.44e-05	0.00503833	0.00694808	3.43627e-05	4.3165e-05
2	2	-2	0.000895812	0.0231344	5.44e-06	3.47e-05	0.00511383	0.00700694	3.47319e-05	4.29748e-05
1.2	2	-1	0.00110118	0.0196815	8.71e-06	2.79e-05	0.00446763	0.00611091	2.78705e-05	4.68599e-05
1.3	2	-1	0.00106781	0.0202103	8.33e-06	2.9e-05	0.00454363	0.00625616	2.90255e-05	4.61674e-05
1.4	2	-1	0.00104235	0.0206504	7.96e-06	2.99e-05	0.00461699	0.00637396	2.99447e-05	4.56574e-05
1.5	2	-1	0.00102077	0.0210408	7.59e-06	3.07e-05	0.00468991	0.00647598	3.07236e-05	4.52365e-05
1.6	2	-1	0.000999522	0.021406	7.21e-06	3.14e-05	0.0047651	0.00656925	3.1418e-05	4.48384e-05
1.7	2	-1	0.000980147	0.0217436	6.82e-06	3.2e-05	0.00484093	0.00665349	3.20272e-05	4.44858e-05
1.8	2	-1	0.000964065	0.0220524	6.45e-06	3.26e-05	0.00491553	0.00672889	3.2556e-05	4.41964e-05
1.9	2	-1	0.000946401	0.0223567	6.05e-06	3.31e-05	0.00499386	0.00680166	3.30501e-05	4.38871e-05
2	2	-1	0.000931992	0.0226375	5.66e-06	3.35e-05	0.00507041	0.00686747	3.34818e-05	4.36381e-05
1.2	2	0	0.00115215	0.0187763	8.9e-06	2.55e-05	0.00443094	0.00583843	2.55191e-05	4.81355e-05
1.3	2	0	0.00111703	0.0194101	8.52e-06	2.69e-05	0.00450524	0.00601762	2.69409e-05	4.73117e-05
1.4	2	0	0.00108905	0.0199251	8.16e-06	2.81e-05	0.00457776	0.00615956	2.80559e-05	4.66904e-05
1.5	2	0	0.00106452	0.0203742	7.79e-06	2.9e-05	0.00465054	0.00628044	2.89912e-05	4.61707e-05
1.6	2	0	0.00104293	0.0207737	7.42e-06	2.98e-05	0.00472342	0.00638549	2.97878e-05	4.5733e-05
1.7	2	0	0.0010197	0.0211591	7.03e-06	3.05e-05	0.00480059	0.00648464	3.0524e-05	4.52826e-05
1.8	2	0	0.00100109	0.0215005	6.65e-06	3.11e-05	0.00487554	0.00657043	3.11433e-05	4.4931e-05
1.9	2	0	0.000984143	0.0218193	6.27e-06	3.17e-05	0.00495084	0.0066489	3.16942e-05	4.46179e-05
2	2	0	0.000971216	0.0221069	5.9e-06	3.22e-05	0.00502334	0.00671825	3.21665e-05	4.43814e-05
1.2	2	1	0.00120103	0.0177131	9.08e-06	2.28e-05	0.00439574	0.00551562	2.28428e-05	4.95307e-05
1.3	2	1	0.00116426	0.0184816	8.71e-06	2.46e-05	0.0044684	0.00573817	2.45726e-05	4.85801e-05
1.4	2	1	0.00113393	0.0191059	8.35e-06	2.6e-05	0.00454006	0.00591512	2.5955e-05	4.7823e-05
1.5	2	1	0.00110667	0.0196407	7.98e-06	2.71e-05	0.00461259	0.00606335	2.71072e-05	4.71788e-05
1.6	2	1	0.00108458	0.0200914	7.62e-06	2.8e-05	0.00468344	0.00618534	2.80428e-05	4.66773e-05
1.7	2	1	0.00106077	0.0205198	7.24e-06	2.89e-05	0.00475869	0.00629884	2.89001e-05	4.61716e-05
1.8	2	1	0.00104397	0.0208789	6.88e-06	2.96e-05	0.00482924	0.00639175	2.95855e-05	4.58202e-05
1.9	2	1	0.00102546	0.0212292	6.51e-06	3.02e-05	0.00490374	0.0064806	3.02271e-05	4.54544e-05
2	2	1	0.00100585	0.0215715	6.11e-06	3.08e-05	0.00498178	0.00656577	3.0828e-05	4.50791e-05
1.2	2	2	0.00125954	0.0163756	9.29e-06	1.97e-05	0.00435361	0.00510784	1.96597e-05	5.1215e-05
1.3	2	2	0.00121681	0.0173377	8.92e-06	2.18e-05	0.00442741	0.00539186	2.1771e-05	5.0087e-05
1.4	2	2	0.00118208	0.0181098	8.55e-06	2.35e-05	0.00449962	0.00561573	2.34736e-05	4.91705e-05
1.5	2	2	0.00115235	0.0187559	8.19e-06	2.49e-05	0.00457149	0.00579955	2.48852e-05	4.84006e-05
1.6	2	2	0.00112477	0.0193227	7.82e-06	2.61e-05	0.00464486	0.00595765	2.61e-05	4.77144e-05
1.7	2	2	0.0011004	0.0198134	7.45e-06	2.71e-05	0.00471828	0.00609151	2.71198e-05	4.71351e-05
1.8	2	2	0.00108007	0.0202366	7.08e-06	2.8e-05	0.00479024	0.00620437	2.79665e-05	4.66702e-05
1.9	2	2	0.0010631	0.0206089	6.72e-06	2.87e-05	0.00486083	0.00630151	2.8681e-05	4.62955e-05
2	2	2	0.00104502	0.0209691	6.35e-06	2.93e-05	0.00493478	0.00639371	2.93468e-05	4.59168e-05
1.2	2	3	0.00132672	0.0144473	9.54e-06	1.54e-05	0.00430524	0.00459673	1.54254e-05	5.34014e-05
1.3	2	3	0.00127127	0.0159874	9.13e-06	1.86e-05	0.00438493	0.00498042	1.86418e-05	5.16984e-05
1.4	2	3	0.00122779	0.0169987	8.75e-06	2.08e-05	0.00446121	0.00527926	2.0812e-05	5.05302e-05
1.5	2	3	0.00119392	0.0177746	8.38e-06	2.25e-05	0.00453408	0.00550427	2.2486e-05	4.96353e-05
1.6	2	3	0.00116606	0.018421	8.02e-06	2.39e-05	0.00460522	0.00568844	2.38734e-05	4.88972e-05
1.7	2	3	0.00113871	0.0190097	7.64e-06	2.51e-05	0.0046792	0.00585329	2.51217e-05	4.81941e-05
1.8	2	3	0.00112004	0.0194723	7.3e-06	2.61e-05	0.00474708	0.00597998	2.60733e-05	4.77135e-05
1.9	2	3	0.00109952	0.0199201	6.93e-06	2.7e-05	0.00481931	0.00610055	2.69733e-05	4.72138e-05
2	2	3	0.00107781	0.0203478	6.55e-06	2.78e-05	0.00489543	0.00621348	2.78057e-05	4.67164e-05
1.4	2	4	0.00128839	0.0154251	9e-06	1.73e-05	0.00441031	0.00480034	1.72811e-05	5.23943e-05
1.5	2	4	0.00124545	0.0165491	8.61e-06	1.96e-05	0.00448769	0.00513421	1.96403e-05	5.11403e-05
1.6	2	4	0.00121005	0.0173784	8.23e-06	2.14e-05	0.00456299	0.00537541	2.13936e-05	5.0194e-05
1.7	2	4	0.00118078	0.0180571	7.86e-06	2.28e-05	0.00463629	0.00556929	2.28245e-05	4.94212e-05
1.8	2	4	0.00115391	0.0186583	7.48e-06	2.41e-05	0.0047105	0.0057381	2.40798e-05	4.87234e-05
1.9	2	4	0.00113482	0.0191432	7.14e-06	2.51e-05	0.00477906	0.00587167	2.50708e-05	4.82146e-05
2	2	4	0.00111454	0.0196087	6.77e-06	2.6e-05	0.00485135	0.00599784	2.60037e-05	4.77003e-05
1.5	2	5	0.00130107	0.0147846	8.87e-06	1.58e-05	0.00443763	0.00481739	1.58047e-05	5.3092e-05
1.6	2	5	0.00126278	0.0160144	8.49e-06	1.83e-05	0.00451237	0.00496345	1.83176e-05	5.18118e-05
1.7	2	5	0.00122753	0.0169299	8.1e-06	2.02e-05	0.0045886	0.00523141	2.02194e-05	5.07994e-05
1.8	2	5	0.00119629	0.0176643	7.72e-06	2.17e-05	0.00466473	0.0054421	2.17423e-05	4.99659e-05
1.9	2	5	0.001171	0.0182675	7.35e-06	2.3e-05	0.00473782	0.005612	2.29809e-05	4.92969e-05
2	2	5	0.00115013	0.0187855	6.99e-06	2.4e-05	0.00480865	0.00575542	2.40289e-05	4.87422e-05
1.7	2	6	0.00127515	0.0154269	8.35e-06	1.69e-05	0.00454003	0.00498805	1.69219e-05	5.24614e-05
1.8	2	6	0.00124061	0.0164706	7.96e-06	1.9e-05	0.00461687	0.00511611	1.90497e-05	5.135e-05
1.9	2	6	0.00121425	0.0172059	7.6e-06	2.05e-05	0.00468852	0.00529596	2.05495e-05	5.05826e-05
2	2	6	0.00118651	0.0178715	7.21e-06	2.19e-05	0.00476499	0.00548457	2.18996e-05	4.98403e-05
1.9	2	7	0.00125855	0.0157984	7.85e-06	1.75e-05	0.00463801	0.00515135	1.74668e-05	5.21408e-05
2	2	7	0.00122719	0.0167396	7.46e-06	1.94e-05	0.00471617	0.00528162	1.93645e-05	5.1138e-05
1.2	2.5	-5	0.000885215	0.0224919	7.93e-06	3.55e-05	0.00462312	0.00694067	3.5488e-05	4.26274e-05
1.3	2.5	-5	0.000863551	0.0228127	7.52e-06	3.6e-05	0.00470295	0.00701779	3.60405e-05	4.22907e-05
1.4	2.5	-5	0.000844722	0.0231128	7.12e-06	3.65e-05	0.00478299	0.00708818	3.65235e-05	4.20107e-05
1.5	2.5	-5	0.000829953	0.0233929	6.72e-06	3.69e-05	0.00486164	0.00715253	3.69484e-05	4.18013e-05
1.6	2.5	-5	0.000813309	0.0236695	6.3e-06	3.73e-05	0.00494386	0.00721461	3.73384e-05	4.15668e-05
1.7	2.5	-5	0.000797984	0.023936	5.88e-06	3.77e-05	0.00502674	0.00727321	3.76897e-05	4.13583e-05
1.8	2.5	-5	0.00078336	0.0241945	5.46e-06	3.8e-05	0.00511069	0.00732886	3.80063e-05	4.11647e-05
1.9	2.5	-5	0.000770799	0.0244431	5.04e-06	3.83e-05	0.00519405	0.00738152	3.82929e-05	4.10072e-05
2	2.5	-5	0.000757448	0.0246893	4.6e-06	3.86e-05	0.00527986	0.00743261	3.85546e-05	4.08404e-05
1.2	2.5	-4	0.000940944	0.0218524	8.13e-06	3.37e-05	0.004583	0.00675397	3.37173e-05	4.36079e-05
1.3	2.5	-4	0.000918611	0.0221972	7.74e-06	3.44e-05	0.00466	0.00683988	3.43589e-05	4.32303e-05
1.4	2.5	-4	0.00089846	0.0225173	7.35e-06	3.49e-05	0.00473785	0.00691758	3.49171e-05	4.28982e-05
1.5	2.5	-4	0.000881759	0.0228137	6.96e-06	3.54e-05	0.00481502	0.00698785	3.54028e-05	4.26323e-05
1.6	2.5	-4	0.000865577	0.0230988	6.56e-06	3.58e-05	0.00489369	0.00705402	3.58426e-05	4.23789e-05
1.7	2.5	-4	0.000850638	0.0233718	6.16e-06	3.62e-05	0.00497303	0.00711606	3.62382e-05	4.21526e-05
1.8	2.5	-4	0.000837545	0.0236331	5.75e-06	3.66e-05	0.00505217	0.00717436	3.65957e-05	4.19605e-05
1.9	2.5	-4	0.000823105	0.0238936	5.34e-06	3.69e-05	0.00513442	0.00723139	3.69304e-05	4.17492e-05
2	2.5	-4	0.000810438	0.0241449	4.92e-06	3.72e-05	0.00521627	0.00728554	3.72361e-05	4.15696e-05
1.2	2.5	-3	0.000996413	0.0211783	8.33e-06	3.19e-05	0.00454306	0.00655596	3.18756e-05	4.4658e-05
1.3	2.5	-3	0.000971146	0.0215677	7.95e-06	3.27e-05	0.00461903	0.00665654	3.26531e-05	4.42019e-05
1.4	2.5	-3	0.000947459	0.0219258	7.55e-06	3.33e-05	0.00469669	0.00674659	3.33261e-05	4.37855e-05
1.5	2.5	-3	0.000928995	0.0222461	7.17e-06	3.39e-05	0.0047725	0.00682514	3.38925e-05	4.34685e-05
1.6	2.5	-3	0.000913059	0.0225439	6.79e-06	3.44e-05	0.0048481	0.0068965	3.4389e-05	4.32002e-05
1.7	2.5	-3	0.000895748	0.0228355	6.39e-06	3.48e-05	0.00492702	0.00696482	3.48459e-05	4.2915e-05
1.8	2.5	-3	0.000882401	0.0231054	6e-06	3.52e-05	0.00500373	0.00702685	3.52462e-05	4.27005e-05
1.9	2.5	-3	0.000867638	0.0233727	5.6e-06	3.56e-05	0.00508365	0.00708702	3.56181e-05	4.24682e-05
2	2.5	-3	0.000856833	0.0236221	5.21e-06	3.59e-05	0.0051606	0.00714234	3.59495e-05	4.23029e-05
1.2	2.5	-2	0.00104909	0.0204584	8.52e-06	2.99e-05	0.00450514	0.00634264	2.99299e-05	4.57215e-05
1.3	2.5	-2	0.00101924	0.0209112	8.14e-06	3.09e-05	0.00458151	0.00646345	3.08828e-05	4.51504e-05
1.4	2.5	-2	0.000996623	0.0212989	7.76e-06	3.17e-05	0.0046554	0.00656425	3.16577e-05	4.47261e-05
1.5	2.5	-2	0.000976576	0.0216508	7.39e-06	3.23e-05	0.00472968	0.00665348	3.23238e-05	4.43619e-05
1.6	2.5	-2	0.000956424	0.0219856	7e-06	3.29e-05	0.00480647	0.00673642	3.29243e-05	4.40031e-05
1.7	2.5	-2	0.000939168	0.0222934	6.61e-06	3.34e-05	0.00488273	0.0068109	3.34448e-05	4.37034e-05
1.8	2.5	-2	0.000923303	0.0225845	6.22e-06	3.39e-05	0.00495955	0.00687983	3.39097e-05	4.34332e-05
1.9	2.5	-2	0.000908167	0.0228645	5.83e-06	3.43e-05	0.00503745	0.00694485	3.43332e-05	4.31776e-05
2	2.5	-2	0.000894353	0.0231313	5.43e-06	3.47e-05	0.00511558	0.00700555	3.47131e-05	4.29514e-05
1.2	2.5	-1	0.00109977	0.0196785	8.71e-06	2.79e-05	0.00446864	0.00610971	2.78572e-05	4.68375e-05
1.3	2.5	-1	0.00107205	0.0201766	8.35e-06	2.89e-05	0.00454032	0.00624654	2.89444e-05	4.62487e-05
1.4	2.5	-1	0.00104386	0.020633	7.96e-06	2.99e-05	0.00461572	0.0063689	2.99003e-05	4.56871e-05
1.5	2.5	-1	0.00101947	0.0210379	7.58e-06	3.07e-05	0.00469108	0.00647482	3.07096e-05	4.52159e-05
1.6	2.5	-1	0.000998248	0.0214032	7.2e-06	3.14e-05	0.00476632	0.0065681	3.14038e-05	4.48182e-05
1.7	2.5	-1	0.000978897	0.0217409	6.82e-06	3.2e-05	0.0048422	0.00665236	3.20129e-05	4.4466e-05
1.8	2.5	-1	0.000962836	0.0220498	6.44e-06	3.25e-05	0.00491686	0.00672777	3.25416e-05	4.41768e-05
1.9	2.5	-1	0.000947312	0.0223448	6.06e-06	3.3e-05	0.00499282	0.0067983	3.30203e-05	4.39043e-05
2	2.5	-1	0.000932938	0.0226258	5.67e-06	3.35e-05	0.00506927	0.00686419	3.34529e-05	4.36555e-05
1.2	2.5	0	0.00115097	0.018774	8.9e-06	2.55e-05	0.00443178	0.0058375	2.55091e-05	4.81164e-05
1.3	2.5	0	0.00112119	0.0193705	8.54e-06	2.68e-05	0.00450199	0.0060061	2.68451e-05	4.74013e-05
1.4	2.5	0	0.00109062	0.0199057	8.16e-06	2.8e-05	0.00457644	0.00615389	2.80073e-05	4.67246e-05
1.5	2.5	0	0.00106615	0.020356	7.8e-06	2.89e-05	0.00464906	0.0062752	2.89464e-05	4.62036e-05
1.6	2.5	0	0.00104186	0.0207716	7.41e-06	2.98e-05	0.00472445	0.00638457	2.97767e-05	4.5716e-05
1.7	2.5	0	0.00102423	0.0211269	7.05e-06	3.05e-05	0.00479597	0.00647592	3.04536e-05	4.53662e-05
1.8	2.5	0	0.00100288	0.0214838	6.66e-06	3.11e-05	0.00487361	0.00656583	3.11047e-05	4.49641e-05
1.9	2.5	0	0.000987144	0.0217968	6.29e-06	3.16e-05	0.00494742	0.0066429	3.16459e-05	4.46725e-05
2	2.5	0	0.000970222	0.022105	5.89e-06	3.22e-05	0.00502453	0.00671738	3.2155e-05	4.43657e-05
1.2	2.5	1	0.00120499	0.0176616	9.09e-06	2.27e-05	0.00439288	0.00550022	2.27208e-05	4.96271e-05
1.3	2.5	1	0.00116833	0.0184342	8.73e-06	2.45e-05	0.00446522	0.00572419	2.44596e-05	4.86764e-05
1.4	2.5	1	0.0011381	0.0190628	8.37e-06	2.59e-05	0.00453656	0.00590259	2.58528e-05	4.79156e-05
1.5	2.5	1	0.00111093	0.0196008	8e-06	2.7e-05	0.00460876	0.00605194	2.7014e-05	4.72691e-05
1.6	2.5	1	0.00108629	0.0200719	7.63e-06	2.8e-05	0.0046818	0.00617972	2.79957e-05	4.67143e-05
1.7	2.5	1	0.00106253	0.0205009	7.25e-06	2.89e-05	0.0047569	0.00629347	2.88552e-05	4.62088e-05
1.8	2.5	1	0.00104309	0.0208772	6.88e-06	2.96e-05	0.00483018	0.00639102	2.95764e-05	4.58062e-05
1.9	2.5	1	0.0010246	0.0212276	6.5e-06	3.02e-05	0.00490472	0.00647989	3.0218e-05	4.54407e-05
2	2.5	1	0.00100773	0.021554	6.12e-06	3.08e-05	0.00497952	0.00656098	3.07888e-05	4.51163e-05
1.2	2.5	2	0.00125865	0.0163742	9.29e-06	1.97e-05	0.00435425	0.00510725	1.96541e-05	5.12005e-05
1.3	2.5	2	0.00121595	0.0173362	8.91e-06	2.18e-05	0.00442808	0.00539125	2.17649e-05	5.0073e-05
1.4	2.5	2	0.00118125	0.0181083	8.55e-06	2.35e-05	0.00450031	0.00561512	2.34671e-05	4.91571e-05
1.5	2.5	2	0.00115154	0.0187545	8.19e-06	2.49e-05	0.00457222	0.00579895	2.48785e-05	4.83875e-05
1.6	2.5	2	0.00112398	0.0193213	7.81e-06	2.61e-05	0.00464561	0.00595705	2.60931e-05	4.77018e-05
1.7	2.5	2	0.00110216	0.0197921	7.45e-06	2.71e-05	0.00471648	0.00608538	2.70693e-05	4.71757e-05
1.8	2.5	2	0.00107931	0.0202353	7.08e-06	2.8e-05	0.00479106	0.00620379	2.79593e-05	4.66582e-05
1.9	2.5	2	0.00106235	0.0206077	6.72e-06	2.87e-05	0.00486168	0.00630093	2.86737e-05	4.62837e-05
2	2.5	2	0.00104429	0.020968	6.34e-06	2.93e-05	0.00493566	0.00639314	2.93394e-05	4.5905e-05
1.2	2.5	3	0.00132593	0.0144462	9.53e-06	1.54e-05	0.00430581	0.00459768	1.54216e-05	5.33881e-05
1.3	2.5	3	0.00127597	0.0159096	9.15e-06	1.85e-05	0.00438126	0.00495692	1.8472e-05	5.18208e-05
1.4	2.5	3	0.00123259	0.0169326	8.77e-06	2.07e-05	0.00445718	0.00525961	2.06643e-05	5.06454e-05
1.5	2.5	3	0.00119783	0.0177236	8.4e-06	2.24e-05	0.00453056	0.00548922	2.23698e-05	4.9729e-05
1.6	2.5	3	0.00116537	0.0184198	8.01e-06	2.39e-05	0.00460589	0.00568794	2.38679e-05	4.8886e-05
1.7	2.5	3	0.00114289	0.0189621	7.67e-06	2.5e-05	0.00467493	0.00583961	2.50133e-05	4.82916e-05
1.8	2.5	3	0.00111937	0.0194712	7.3e-06	2.61e-05	0.0047478	0.00597948	2.60674e-05	4.77027e-05
1.9	2.5	3	0.00109886	0.0199191	6.93e-06	2.7e-05	0.00482006	0.00610007	2.69674e-05	4.72034e-05
2	2.5	3	0.00107967	0.0203268	6.56e-06	2.78e-05	0.0048932	0.00620761	2.77583e-05	4.67577e-05
1.4	2.5	4	0.00128773	0.0154241	9e-06	1.73e-05	0.00441086	0.00479994	1.72774e-05	5.23833e-05
1.5	2.5	4	0.00124481	0.0165482	8.61e-06	1.96e-05	0.00448827	0.00513381	1.96363e-05	5.113e-05
1.6	2.5	4	0.00120943	0.0173774	8.23e-06	2.14e-05	0.00456358	0.005375	2.13893e-05	5.01839e-05
1.7	2.5	4	0.00118293	0.0180258	7.87e-06	2.28e-05	0.00463409	0.00556011	2.27535e-05	4.94744e-05
1.8	2.5	4	0.00115805	0.0186082	7.51e-06	2.4e-05	0.00470602	0.00572371	2.39681e-05	4.88192e-05
1.9	2.5	4	0.00113424	0.0191423	7.13e-06	2.51e-05	0.00477972	0.00587125	2.50658e-05	4.82051e-05
2	2.5	4	0.00111397	0.0196079	6.77e-06	2.6e-05	0.00485203	0.00599744	2.59988e-05	4.76913e-05
1.5	2.5	5	0.0013005	0.0147839	8.86e-06	1.58e-05	0.00443815	0.00481825	1.58018e-05	5.30822e-05
1.6	2.5	5	0.00126221	0.0160137	8.49e-06	1.83e-05	0.00451291	0.00496312	1.83144e-05	5.18027e-05
1.7	2.5	5	0.00122698	0.0169292	8.1e-06	2.02e-05	0.00458916	0.00523107	2.02158e-05	5.07905e-05
1.8	2.5	5	0.00119576	0.0176636	7.71e-06	2.17e-05	0.0046653	0.00544176	2.17385e-05	4.99573e-05
1.9	2.5	5	0.00117319	0.018236	7.36e-06	2.29e-05	0.00473532	0.00560285	2.29107e-05	4.93511e-05
2	2.5	5	0.00114962	0.0187848	6.98e-06	2.4e-05	0.00480926	0.00575509	2.40249e-05	4.87339e-05
1.7	2.5	6	0.00127465	0.0154264	8.35e-06	1.69e-05	0.00454054	0.00498889	1.69193e-05	5.24532e-05
1.8	2.5	6	0.00124012	0.01647	7.96e-06	1.9e-05	0.00461739	0.00511698	1.90468e-05	5.13421e-05
1.9	2.5	6	0.00121377	0.0172054	7.59e-06	2.05e-05	0.00468906	0.00529568	2.05464e-05	5.05748e-05
2	2.5	6	0.00118604	0.0178709	7.21e-06	2.19e-05	0.00476555	0.00548428	2.18963e-05	4.98329e-05
1.9	2.5	7	0.00125812	0.015798	7.85e-06	1.75e-05	0.0046385	0.00515217	1.74644e-05	5.21337e-05
2	2.5	7	0.00122677	0.0167391	7.45e-06	1.94e-05	0.00471668	0.00528246	1.93617e-05	5.1131e-05

## Sheet: （13，30.3）
																					whole potentials of the equilibrium droplet		the unit length energy barrier
0	0	0	0.001934	0	1.18e-05	1.18e-05	0.003868	0.003868	0	4.70027e-05		(0,0,0)	-2.952	28.93	-2.304	-0.8026	-18580	41.86	91.34		3.196e-06		5.6e-06
0.2	0	0	0.00179258	0.00355963	1.17e-05	1.18e-05	0.00388058	0.00388897	1.01016e-06	4.57399e-05		(1,0,0)	3.865	-25.12	4.365	4.476	51760	1.364	-48.83
0.4	0	0	0.00169345	0.00499877	1.15e-05	1.19e-05	0.00391744	0.0039504	1.97951e-06	4.47172e-05		(0,1,0)	3.67	1.053	3.472	2.904	-393.3	-1.721	-1.865
0.6	0	0	0.00159432	0.00609251	1.12e-05	1.21e-05	0.00397857	0.00405229	2.9099e-06	4.37267e-05		(0,0,1)	-1.096	1.633	-1.037	-0.949	497	13.64	0.3881
0.75	0	0	0.00154799	0.00625147	1.09e-05	1.22e-05	0.00402749	0.00413382	3.0383e-06	4.26094e-05		(2,0,0)	2.238	-15.3	2.042	2.082	-52370	-14.72	-45.05
0.8	0	0	0.00144963	0.00916912	1.06e-05	1.24e-05	0.0040863	0.00423182	6.47129e-06	4.10829e-05		(1,1,0)	5.83	5.953	5.969	6.023	258.4	2.116	2.321
0.85	0	0	0.0013776	0.010924	1.04e-05	1.26e-05	0.00413743	0.00431704	9.10656e-06	4.01575e-05		(1,0,1)	1.826	-4.193	1.758	1.584	-1072	-30.63	-1.248
0.9	0	0	0.00132101	0.0121615	1.01e-05	1.27e-05	0.00418446	0.00439543	1.11977e-05	3.95546e-05		(0,2,0)	3.527	1.097	3.337	2.792	-1630	-1.315	-1.787
1	0	0	0.00125431	0.0136738	9.76e-06	1.39e-05	0.00426046	0.0045221	1.39769e-05	3.97295e-05		(0,1,1)	0.9528	0.9518	0.9526	0.9529	38.36	0.9509	0.952
1.1	0	0	0.00119565	0.0148424	9.36e-06	1.62e-05	0.0043392	0.00465334	1.62539e-05	3.99053e-05		(0,0,2)	0.03165	-0.001411	0.03529	0.03694	-3.244	-0.1022	0.004084
1.2	0	0	0.00114798	0.0157909	8.97e-06	1.81e-05	0.00441707	0.00491286	1.81628e-05	4.01678e-05		(3,0,0)	-0.3416	32.8	-0.7643	-0.7211	23020	-9.995	59.99
1.3	0	0	0.00111263	0.0165867	8.6e-06	1.97e-05	0.00449095	0.00514521	1.97981e-05	4.06117e-05		(2,1,0)	2.773	4.837	3.089	3.024	113.9	13.7	3.265
1.5	0	0	0.00105452	0.0179138	7.84e-06	2.24e-05	0.00464016	0.00552427	2.25395e-05	4.15212e-05		(2,0,1)	-0.8143	3.329	-0.8152	-0.7267	760.8	22.46	1.297
1.7	0	0	0.00100815	0.0190164	7.08e-06	2.47e-05	0.00479138	0.00583004	2.47901e-05	4.24029e-05		(1,2,0)	1.706	0.8477	1.741	1.72	58.42	-1.208	0.5045
1.2	0	-5	0.000895762	0.0222479	8.03e-06	3.48e-05	0.00460237	0.00687099	3.49787e-05	4.30468e-05		(1,1,1)	3.754	3.423	4.129	4.081	-765.6	3.499	1.093
1.3	0	-5	0.000873224	0.0225758	7.63e-06	3.54e-05	0.0046815	0.00695071	3.55596e-05	4.26827e-05		(1,0,2)	-0.0439	-0.0005675	-0.04949	-0.05266	4.554	0.1423	-0.006818
1.4	0	-5	0.000855854	0.0228765	7.24e-06	3.59e-05	0.00475897	0.00702219	3.60618e-05	4.24114e-05		(0,3,0)	2.814	0.924	2.664	2.23	-164.1	-0.6672	-1.474
1.5	0	-5	0.000837036	0.0231693	6.83e-06	3.64e-05	0.00483989	0.00709005	3.65165e-05	4.21241e-05		(0,2,1)	0.7639	0.7599	0.7627	0.7627	187.8	0.7538	0.76
1.6	0	-5	0.000821587	0.023446	6.43e-06	3.68e-05	0.00491982	0.00715295	3.69228e-05	4.18955e-05		(0,1,2)	0.7726	0.7811	0.7878	0.7733	0.7774	0.7843	0.7664
1.7	0	-5	0.000807589	0.0237108	6.02e-06	3.71e-05	0.00500013	0.00721194	3.72871e-05	4.16975e-05		(0,0,3)	-0.0001924	-1.139e-05	-0.0002204	-0.0002296	0.009122	0.0003652	-1.678e-05
1.8	0	-5	0.00079562	0.0239645	5.61e-06	3.75e-05	0.00507991	0.00726748	3.76165e-05	4.15352e-05		(4,0,0)	0.09642	-10.64	-0.337	-0.4885	-3727	5.94	-15.41
1.9	0	-5	0.000779855	0.024224	5.18e-06	3.78e-05	0.00516558	0.00732299	3.79268e-05	4.13148e-05		(3,1,0)	0.2302	-20.06	0.01649	-0.149	-1292	-68.24	-15.94
2	0	-5	0.000769032	0.0244657	4.77e-06	3.81e-05	0.00524713	0.00737406	3.82029e-05	4.11773e-05		(3,0,1)	0.04907	-0.8602	0.05948	0.04745	-177.1	-5.319	-0.4359
1.2	0	-4	0.000947382	0.0216384	8.22e-06	3.32e-05	0.00456444	0.00669273	3.32926e-05	4.39911e-05		(2,2,0)	-1.031	14.05	-0.7638	-0.543	968.5	48.47	11.62
1.3	0	-4	0.000924021	0.021994	7.84e-06	3.38e-05	0.00464107	0.00678226	3.39711e-05	4.35844e-05		(2,1,1)	0.1351	-0.1588	0.1341	0.1456	-19.2	-0.7322	-0.1468
1.4	0	-4	0.000902633	0.0223238	7.44e-06	3.44e-05	0.00471887	0.00686315	3.45617e-05	4.32193e-05		(2,0,2)	0.0149	0.002483	0.01707	0.01863	-1.541	-0.04702	0.002908
1.5	0	-4	0.000886923	0.0226203	7.06e-06	3.49e-05	0.00479408	0.00693417	3.50612e-05	4.29614e-05		(1,3,0)	-0.3936	-4.115	-0.5367	-0.6052	-273.2	-12.52	-3.318
1.6	0	-4	0.000869203	0.0229122	6.66e-06	3.54e-05	0.00487318	0.00700249	3.55222e-05	4.26743e-05		(1,2,1)	-0.8231	-0.6058	-0.8964	-0.8916	163	-0.3328	-0.1419
1.7	0	-4	0.000855087	0.0231847	6.27e-06	3.58e-05	0.00495069	0.00706502	3.5929e-05	4.24524e-05		(1,1,2)	0.001568	-0.0003543	0.001635	0.001727	-0.1068	-0.003	-0.0004442
1.8	0	-4	0.000840238	0.0234522	5.86e-06	3.62e-05	0.00503074	0.00712514	3.63034e-05	4.22239e-05		(1,0,3)	0.0001394	1.247e-05	0.0001589	0.0001671	-0.006411	-0.0002465	1.365e-05
1.9	0	-4	0.000829066	0.0237037	5.47e-06	3.65e-05	0.00510834	0.00718083	3.66395e-05	4.20584e-05		(0,4,0)	-0.7523	0.06533	-0.698	-0.5776	122.2	1.237	0.644
2	0	-4	0.00081708	0.0239534	5.07e-06	3.68e-05	0.00518829	0.00723514	3.69537e-05	4.18824e-05		(0,3,1)	-0.1814	-0.1997	-0.1816	-0.181	-40.35	-0.2342	-0.2
1.2	0	-3	0.000995698	0.0209953	8.4e-06	3.14e-05	0.00452895	0.00650293	3.15247e-05	4.49399e-05		(0,2,2)	-0.1549	-0.1561	-0.158	-0.1551	-0.129	-0.1561	-0.1532
1.3	0	-3	0.000971528	0.0213889	8.03e-06	3.22e-05	0.00460326	0.00660547	3.23251e-05	4.4491e-05		(0,1,3)	4.704e-06	1.129e-07	4.938e-06	5.079e-06	-0.0001702	-4.057e-06	-7.814e-07
1.4	0	-3	0.000948846	0.0217504	7.64e-06	3.29e-05	0.00467926	0.00669716	3.30187e-05	4.40809e-05		(0,0,4)	3.352e-07	1.891e-08	3.953e-07	4.079e-07	-9.795e-06	-5.566e-07	1.973e-08
1.5	0	-3	0.000928973	0.0220805	7.26e-06	3.35e-05	0.00475546	0.00677877	3.36148e-05	4.37318e-05
1.6	0	-3	0.000911468	0.0223873	6.87e-06	3.4e-05	0.00483177	0.00685286	3.4137e-05	4.34297e-05
1.7	0	-3	0.000897163	0.022671	6.49e-06	3.45e-05	0.0049069	0.00691992	3.4593e-05	4.31882e-05
1.8	0	-3	0.000882099	0.0229482	6.1e-06	3.49e-05	0.00498461	0.00698403	3.50122e-05	4.29399e-05
1.9	0	-3	0.000870284	0.0232071	5.71e-06	3.52e-05	0.00506039	0.00704289	3.53841e-05	4.27492e-05
2	0	-3	0.00085761	0.0234637	5.32e-06	3.56e-05	0.00513867	0.00710018	3.57324e-05	4.2547e-05
1.2	0	-2	0.00104808	0.020278	8.6e-06	2.95e-05	0.00449046	0.00629038	2.95929e-05	4.60185e-05
1.3	0	-2	0.00102066	0.0207289	8.23e-06	3.04e-05	0.00456416	0.0064115	3.05542e-05	4.54767e-05
1.4	0	-2	0.000996821	0.0211294	7.85e-06	3.12e-05	0.00463814	0.00651641	3.13679e-05	4.50198e-05
1.5	0	-2	0.000975422	0.021493	7.47e-06	3.19e-05	0.0047128	0.00660929	3.20684e-05	4.46224e-05
1.6	0	-2	0.000955972	0.021829	7.09e-06	3.26e-05	0.00478818	0.00669313	3.2682e-05	4.42687e-05
1.7	0	-2	0.000937176	0.0221475	6.7e-06	3.31e-05	0.00486525	0.00677082	3.32324e-05	4.3933e-05
1.8	0	-2	0.000921867	0.0224385	6.32e-06	3.36e-05	0.00494078	0.00684017	3.3706e-05	4.36676e-05
1.9	0	-2	0.000907248	0.022718	5.93e-06	3.4e-05	0.00501739	0.00690549	3.41371e-05	4.34168e-05
2	0	-2	0.000893909	0.0229849	5.54e-06	3.44e-05	0.00509422	0.0069667	3.45268e-05	4.31919e-05
1.2	0	-1	0.00109927	0.0194861	8.79e-06	2.74e-05	0.00445285	0.0060538	2.74955e-05	4.71772e-05
1.3	0	-1	0.00106697	0.0200239	8.41e-06	2.86e-05	0.0045273	0.00620248	2.86829e-05	4.64815e-05
1.4	0	-1	0.00104236	0.0204692	8.05e-06	2.95e-05	0.00459911	0.00632246	2.96248e-05	4.59713e-05
1.5	0	-1	0.00101872	0.0208775	7.67e-06	3.03e-05	0.00467304	0.00642994	3.04522e-05	4.55005e-05
1.6	0	-1	0.000998316	0.0212437	7.3e-06	3.1e-05	0.0047467	0.00652407	3.11588e-05	4.51087e-05
1.7	0	-1	0.000979565	0.0215835	6.92e-06	3.17e-05	0.00482113	0.00660949	3.17834e-05	4.47565e-05
1.8	0	-1	0.000959921	0.0219123	6.53e-06	3.22e-05	0.00489885	0.00669037	3.23575e-05	4.43986e-05
1.9	0	-1	0.000944852	0.0222078	6.15e-06	3.27e-05	0.00497365	0.00676149	3.28461e-05	4.41273e-05
2	0	-1	0.000928811	0.0224982	5.76e-06	3.32e-05	0.00505148	0.00683002	3.33017e-05	4.38449e-05
1.2	0	1	0.00119945	0.0174664	9.16e-06	2.23e-05	0.00437925	0.00544243	2.23606e-05	4.99277e-05
1.3	0	1	0.00116364	0.0182497	8.8e-06	2.4e-05	0.00445036	0.00567026	2.4127e-05	4.89773e-05
1.4	0	1	0.00112909	0.0189306	8.43e-06	2.55e-05	0.00452477	0.00586442	2.56469e-05	4.81044e-05
1.5	0	1	0.00110252	0.0194741	8.06e-06	2.67e-05	0.00459609	0.0060158	2.68275e-05	4.74544e-05
1.6	0	1	0.0010784	0.0199492	7.7e-06	2.77e-05	0.00466824	0.0061452	2.7826e-05	4.68958e-05
1.7	0	1	0.00105776	0.0203636	7.34e-06	2.85e-05	0.00473975	0.00625547	2.86626e-05	4.64396e-05
1.8	0	1	0.00103614	0.0207588	6.96e-06	2.93e-05	0.00481485	0.00635847	2.94304e-05	4.59856e-05
1.9	0	1	0.00101805	0.0211106	6.58e-06	3e-05	0.0048885	0.00644811	3.00822e-05	4.5618e-05
2	0	1	0.00100423	0.0214217	6.23e-06	3.05e-05	0.00495913	0.00652571	3.06318e-05	4.53414e-05
1.2	0	2	0.00125542	0.0161276	9.37e-06	1.91e-05	0.00433813	0.00503362	1.9194e-05	5.15751e-05
1.3	0	2	0.00121366	0.0171084	9e-06	2.13e-05	0.00441055	0.00532415	2.13428e-05	5.04462e-05
1.4	0	2	0.00117718	0.0179166	8.63e-06	2.3e-05	0.00448355	0.00555938	2.3128e-05	4.94757e-05
1.5	0	2	0.00114324	0.0186165	8.25e-06	2.46e-05	0.00455868	0.00575936	2.46661e-05	4.85982e-05
1.6	0	2	0.00112118	0.0191455	7.91e-06	2.57e-05	0.00462634	0.00590728	2.5803e-05	4.80165e-05
1.7	0	2	0.00109735	0.0196433	7.55e-06	2.67e-05	0.00469854	0.00604384	2.68478e-05	4.74322e-05
1.8	0	2	0.00107499	0.020091	7.17e-06	2.76e-05	0.00477204	0.00616404	2.77564e-05	4.69106e-05
1.9	0	2	0.00105586	0.0204849	6.81e-06	2.84e-05	0.00484451	0.00626749	2.8524e-05	4.64811e-05
2	0	2	0.00103816	0.0208468	6.44e-06	2.91e-05	0.00491758	0.00636054	2.92006e-05	4.61003e-05
1.2	0	3	0.0013221	0.0140705	9.62e-06	1.47e-05	0.00428914	0.0045699	1.47292e-05	5.38655e-05
1.3	0	3	0.00126777	0.0157139	9.22e-06	1.81e-05	0.00436748	0.00489869	1.81337e-05	5.20933e-05
1.4	0	3	0.00122519	0.0167606	8.84e-06	2.03e-05	0.0044424	0.00520926	2.0377e-05	5.09044e-05
1.5	0	3	0.00119108	0.0175589	8.48e-06	2.2e-05	0.00451475	0.00544163	2.21008e-05	4.9989e-05
1.6	0	3	0.00115755	0.0182775	8.09e-06	2.36e-05	0.00459071	0.00564735	2.36525e-05	4.91097e-05
1.7	0	3	0.00113551	0.0188234	7.75e-06	2.47e-05	0.00465882	0.00580052	2.48116e-05	4.85138e-05
1.8	0	3	0.00111243	0.0193359	7.38e-06	2.58e-05	0.00473077	0.00594184	2.58798e-05	4.79238e-05
1.9	0	3	0.00109232	0.0197871	7.02e-06	2.67e-05	0.0048021	0.0060638	2.6794e-05	4.74218e-05
2	0	3	0.00107103	0.0202181	6.64e-06	2.75e-05	0.00487734	0.00617812	2.76413e-05	4.69207e-05
1.4	0	4	0.00127996	0.015198	9.08e-06	1.68e-05	0.00439545	0.00474708	1.68845e-05	5.26923e-05
1.5	0	4	0.00123779	0.0163637	8.69e-06	1.93e-05	0.00447185	0.0050799	1.93296e-05	5.1407e-05
1.6	0	4	0.00120304	0.0172074	8.32e-06	2.1e-05	0.00454616	0.00532608	2.11165e-05	5.04541e-05
1.7	0	4	0.0011743	0.0178915	7.95e-06	2.25e-05	0.00461845	0.00552208	2.25625e-05	4.96815e-05
1.8	0	4	0.00115096	0.0184639	7.6e-06	2.37e-05	0.00468832	0.00568321	2.37597e-05	4.90539e-05
1.9	0	4	0.00112757	0.0190008	7.23e-06	2.48e-05	0.0047611	0.00583202	2.48693e-05	4.84395e-05
2	0	4	0.00110766	0.0194695	6.87e-06	2.57e-05	0.00483248	0.00595955	2.58157e-05	4.79225e-05
1.6	0	5	0.00125537	0.0158	8.58e-06	1.79e-05	0.00449489	0.00491281	1.79531e-05	5.21109e-05
1.7	0	5	0.00122073	0.0167455	8.2e-06	1.98e-05	0.00457012	0.00517819	1.99201e-05	5.10763e-05
1.8	0	5	0.00119004	0.0174925	7.82e-06	2.14e-05	0.00464525	0.00539326	2.14741e-05	5.02357e-05
1.9	0	5	0.00116252	0.0181308	7.43e-06	2.27e-05	0.00472044	0.00557373	2.27921e-05	4.95057e-05
2	0	5	0.00114309	0.0186382	7.09e-06	2.37e-05	0.0047891	0.00571457	2.38223e-05	4.89764e-05
1.7	0	6	0.00126797	0.015175	8.44e-06	1.64e-05	0.00452096	0.00495626	1.64904e-05	5.27982e-05
1.8	0	6	0.001234	0.0162612	8.06e-06	1.86e-05	0.0045968	0.00508267	1.87034e-05	5.16554e-05
1.9	0	6	0.00120291	0.0170923	7.67e-06	2.03e-05	0.00467346	0.00526409	2.04097e-05	5.07408e-05
2	0	6	0.00118081	0.0176968	7.32e-06	2.15e-05	0.00474291	0.00543558	2.16358e-05	5.0118e-05
1.9	0	7	0.00125199	0.0155483	7.96e-06	1.7e-05	0.00461636	0.00511527	1.70453e-05	5.24834e-05
2	0	7	0.00122112	0.0165278	7.57e-06	1.89e-05	0.00469355	0.00524391	1.90221e-05	5.14496e-05
1.2	0.5	-5	0.00088519	0.022357	7.99e-06	3.51e-05	0.00461014	0.00690258	3.52782e-05	4.28647e-05
1.3	0.5	-5	0.000864472	0.0226774	7.6e-06	3.57e-05	0.00468847	0.00698011	3.58403e-05	4.25352e-05
1.4	0.5	-5	0.000846471	0.0229777	7.2e-06	3.62e-05	0.00476701	0.00705108	3.63349e-05	4.22579e-05
1.5	0.5	-5	0.000829711	0.0232633	6.8e-06	3.66e-05	0.00484662	0.00711697	3.67738e-05	4.20097e-05
1.6	0.5	-5	0.000813752	0.0235394	6.39e-06	3.7e-05	0.00492749	0.00717937	3.71725e-05	4.1778e-05
1.7	0.5	-5	0.000799288	0.0238045	5.97e-06	3.74e-05	0.00500877	0.00723809	3.75312e-05	4.15759e-05
1.8	0.5	-5	0.000785503	0.0240615	5.56e-06	3.77e-05	0.00509106	0.00729386	3.78555e-05	4.13888e-05
1.9	0.5	-5	0.000771835	0.0243138	5.13e-06	3.8e-05	0.00517491	0.00734762	3.81533e-05	4.12069e-05
2	0.5	-5	0.000760656	0.024556	4.72e-06	3.83e-05	0.00525738	0.00739851	3.84247e-05	4.10659e-05
1.2	0.5	-4	0.000939806	0.0217296	8.2e-06	3.34e-05	0.00457001	0.00671946	3.35434e-05	4.38492e-05
1.3	0.5	-4	0.000915861	0.0220832	7.8e-06	3.41e-05	0.00464757	0.00680805	3.42115e-05	4.34346e-05
1.4	0.5	-4	0.000896374	0.0224034	7.42e-06	3.46e-05	0.00472424	0.00688621	3.47789e-05	4.31068e-05
1.5	0.5	-4	0.000880253	0.0226992	7.03e-06	3.51e-05	0.00480021	0.00695673	3.52718e-05	4.28448e-05
1.6	0.5	-4	0.000864612	0.0229837	6.64e-06	3.56e-05	0.00487767	0.00702313	3.57187e-05	4.25938e-05
1.7	0.5	-4	0.000847659	0.023263	6.23e-06	3.6e-05	0.00495842	0.00708681	3.6128e-05	4.23288e-05
1.8	0.5	-4	0.000834995	0.0235236	5.83e-06	3.63e-05	0.00503652	0.00714528	3.64917e-05	4.21377e-05
1.9	0.5	-4	0.000820996	0.023783	5.42e-06	3.67e-05	0.00511772	0.00720234	3.6831e-05	4.19282e-05
2	0.5	-4	0.000808722	0.0240325	5.01e-06	3.7e-05	0.00519853	0.00725634	3.71396e-05	4.17514e-05
1.2	0.5	-3	0.000991336	0.021071	8.39e-06	3.16e-05	0.00453215	0.00652556	3.17359e-05	4.48481e-05
1.3	0.5	-3	0.000966742	0.0214617	8.01e-06	3.24e-05	0.00460707	0.00662696	3.25254e-05	4.43956e-05
1.4	0.5	-3	0.000943673	0.0218208	7.62e-06	3.31e-05	0.0046837	0.00671769	3.32093e-05	4.39819e-05
1.5	0.5	-3	0.000923449	0.0221496	7.23e-06	3.37e-05	0.00476053	0.00679866	3.37982e-05	4.36285e-05
1.6	0.5	-3	0.000907935	0.0224472	6.85e-06	3.42e-05	0.00483524	0.00687028	3.4301e-05	4.33624e-05
1.7	0.5	-3	0.000891059	0.0227388	6.46e-06	3.46e-05	0.00491325	0.00693893	3.47651e-05	4.30776e-05
1.8	0.5	-3	0.000878072	0.0230075	6.07e-06	3.5e-05	0.00498905	0.00700092	3.51689e-05	4.2866e-05
1.9	0.5	-3	0.000863681	0.0232738	5.67e-06	3.54e-05	0.00506807	0.00706111	3.5545e-05	4.26355e-05
2	0.5	-3	0.000850781	0.0235303	5.27e-06	3.57e-05	0.00514703	0.00711814	3.58889e-05	4.24319e-05
1.2	0.5	-2	0.00104356	0.0203524	8.58e-06	2.97e-05	0.00449378	0.00631262	2.97942e-05	4.59201e-05
1.3	0.5	-2	0.00101507	0.020804	8.2e-06	3.06e-05	0.00456861	0.0064336	3.07538e-05	4.53614e-05
1.4	0.5	-2	0.000990901	0.0212014	7.83e-06	3.14e-05	0.00464322	0.00653731	3.1556e-05	4.4904e-05
1.5	0.5	-2	0.000969193	0.0215637	7.44e-06	3.21e-05	0.00471853	0.00662957	3.22502e-05	4.45014e-05
1.6	0.5	-2	0.000949465	0.0218977	7.06e-06	3.27e-05	0.00479455	0.00671256	3.28547e-05	4.41466e-05
1.7	0.5	-2	0.000932582	0.0222057	6.68e-06	3.32e-05	0.00487003	0.00678738	3.3382e-05	4.3847e-05
1.8	0.5	-2	0.000917061	0.0224962	6.29e-06	3.37e-05	0.00494608	0.00685641	3.38515e-05	4.35785e-05
1.9	0.5	-2	0.000904462	0.0227664	5.91e-06	3.41e-05	0.00502063	0.00691938	3.42654e-05	4.33638e-05
2	0.5	-2	0.000888731	0.0230421	5.51e-06	3.45e-05	0.00510056	0.00698239	3.46645e-05	4.30981e-05
1.2	0.5	-1	0.0010942	0.019567	8.77e-06	2.76e-05	0.00445658	0.00607805	2.77076e-05	4.70573e-05
1.3	0.5	-1	0.00106431	0.0200838	8.4e-06	2.87e-05	0.00452941	0.0062205	2.88447e-05	4.64148e-05
1.4	0.5	-1	0.00103666	0.0205415	8.02e-06	2.97e-05	0.00460399	0.00634356	2.98107e-05	4.58525e-05
1.5	0.5	-1	0.00101558	0.0209324	7.66e-06	3.05e-05	0.00467593	0.00644614	3.05985e-05	4.54335e-05
1.6	0.5	-1	0.000991432	0.0213148	7.27e-06	3.12e-05	0.00475344	0.0065442	3.13339e-05	4.49761e-05
1.7	0.5	-1	0.000972454	0.0216531	6.89e-06	3.18e-05	0.00482853	0.00662895	3.19513e-05	4.46222e-05
1.8	0.5	-1	0.000956716	0.0219612	6.51e-06	3.24e-05	0.00490238	0.0067044	3.24839e-05	4.43353e-05
1.9	0.5	-1	0.000939411	0.0222655	6.12e-06	3.29e-05	0.00497998	0.00677745	3.29842e-05	4.40266e-05
2	0.5	-1	0.000925302	0.0225458	5.74e-06	3.33e-05	0.00505578	0.00684336	3.34201e-05	4.37789e-05
1.2	0.5	0	0.00114514	0.0186505	8.96e-06	2.52e-05	0.00441915	0.00580204	2.53279e-05	4.83593e-05
1.3	0.5	0	0.00111073	0.0192907	8.59e-06	2.67e-05	0.00449247	0.00598364	2.67727e-05	4.75324e-05
1.4	0.5	0	0.00108331	0.0198104	8.23e-06	2.78e-05	0.00456401	0.00612743	2.79071e-05	4.69057e-05
1.5	0.5	0	0.00105929	0.0202622	7.86e-06	2.87e-05	0.00463579	0.00624953	2.88568e-05	4.63835e-05
1.6	0.5	0	0.00103543	0.0206794	7.49e-06	2.96e-05	0.00471034	0.00635972	2.96983e-05	4.5892e-05
1.7	0.5	0	0.00101538	0.0210494	7.11e-06	3.03e-05	0.00478386	0.00645516	3.04103e-05	4.54943e-05
1.8	0.5	0	0.000997162	0.0213916	6.74e-06	3.09e-05	0.00485781	0.00654158	3.10394e-05	4.51409e-05
1.9	0.5	0	0.000979249	0.0217172	6.36e-06	3.15e-05	0.00493363	0.00662208	3.16095e-05	4.48053e-05
2	0.5	0	0.000964604	0.0220147	5.98e-06	3.2e-05	0.00500765	0.00669417	3.21054e-05	4.45335e-05
1.2	0.5	1	0.00119386	0.0175742	9.14e-06	2.25e-05	0.00438336	0.00547512	2.26221e-05	4.97744e-05
1.3	0.5	1	0.00115776	0.0183496	8.78e-06	2.43e-05	0.00445504	0.00570022	2.4373e-05	4.88219e-05
1.4	0.5	1	0.00112801	0.0189802	8.42e-06	2.57e-05	0.0045257	0.00587954	2.57773e-05	4.80602e-05
1.5	0.5	1	0.00110127	0.0195202	8.06e-06	2.68e-05	0.00459723	0.00602976	2.69496e-05	4.74109e-05
1.6	0.5	1	0.00107701	0.0199923	7.69e-06	2.78e-05	0.00466961	0.00615814	2.79401e-05	4.68545e-05
1.7	0.5	1	0.00105624	0.0204053	7.33e-06	2.87e-05	0.00474133	0.0062679	2.87728e-05	4.63966e-05
1.8	0.5	1	0.00103449	0.0207985	6.95e-06	2.94e-05	0.00481667	0.0063702	2.95346e-05	4.59439e-05
1.9	0.5	1	0.00101629	0.021149	6.57e-06	3.01e-05	0.00489054	0.00645935	3.01821e-05	4.55768e-05
2	0.5	1	0.000999693	0.0214752	6.2e-06	3.06e-05	0.00496469	0.00654065	3.07581e-05	4.52509e-05
1.2	0.5	2	0.0012536	0.016203	9.36e-06	1.93e-05	0.00433947	0.00505688	1.93696e-05	5.15072e-05
1.3	0.5	2	0.00120601	0.0172382	8.97e-06	2.16e-05	0.00441663	0.00536324	2.16463e-05	5.0248e-05
1.4	0.5	2	0.00117098	0.0180212	8.61e-06	2.33e-05	0.00448887	0.00559066	2.33786e-05	4.93123e-05
1.5	0.5	2	0.00114171	0.0186688	8.25e-06	2.47e-05	0.00456009	0.00577522	2.47992e-05	4.85423e-05
1.6	0.5	2	0.00111457	0.0192374	7.88e-06	2.59e-05	0.00463282	0.00593413	2.60241e-05	4.78549e-05
1.7	0.5	2	0.00109558	0.0196892	7.54e-06	2.69e-05	0.00470038	0.00605752	2.69653e-05	4.73796e-05
1.8	0.5	2	0.0010731	0.0201344	7.16e-06	2.78e-05	0.00477412	0.00617686	2.78671e-05	4.68591e-05
1.9	0.5	2	0.00105387	0.0205264	6.79e-06	2.85e-05	0.00484683	0.00627961	2.86291e-05	4.64305e-05
2	0.5	2	0.00103608	0.0208868	6.42e-06	2.92e-05	0.00492013	0.00637212	2.93008e-05	4.60503e-05
1.2	0.5	3	0.00131482	0.0143055	9.59e-06	1.52e-05	0.00429449	0.00457882	1.52118e-05	5.36002e-05
1.3	0.5	3	0.00126556	0.0157985	9.21e-06	1.83e-05	0.00436924	0.0049247	1.83241e-05	5.20095e-05
1.4	0.5	3	0.00122279	0.0168314	8.83e-06	2.05e-05	0.00444445	0.00523083	2.05425e-05	5.08276e-05
1.5	0.5	3	0.00118853	0.0176248	8.46e-06	2.22e-05	0.00451709	0.00546156	2.22586e-05	4.99105e-05
1.6	0.5	3	0.00115569	0.0183316	8.08e-06	2.37e-05	0.00459253	0.00566366	2.37857e-05	4.90476e-05
1.7	0.5	3	0.00113355	0.0188745	7.74e-06	2.48e-05	0.00466086	0.00581582	2.49384e-05	4.84532e-05
1.8	0.5	3	0.00111037	0.0193847	7.37e-06	2.59e-05	0.00473305	0.00595631	2.60011e-05	4.78626e-05
1.9	0.5	3	0.00109016	0.0198334	7.01e-06	2.68e-05	0.00480462	0.0060774	2.69088e-05	4.73617e-05
2	0.5	3	0.00106877	0.020262	6.63e-06	2.76e-05	0.0048801	0.00619088	2.77493e-05	4.68622e-05
1.4	0.5	4	0.00127746	0.0152978	9.07e-06	1.7e-05	0.00439759	0.00476317	1.71008e-05	5.25914e-05
1.5	0.5	4	0.00123513	0.0164408	8.68e-06	1.94e-05	0.0044743	0.00510333	1.95043e-05	5.13212e-05
1.6	0.5	4	0.00120024	0.0172759	8.3e-06	2.12e-05	0.0045489	0.0053467	2.12755e-05	5.03708e-05
1.7	0.5	4	0.00117411	0.0179259	7.95e-06	2.26e-05	0.00461865	0.00553265	2.26485e-05	4.96596e-05
1.8	0.5	4	0.00114876	0.0185174	7.58e-06	2.38e-05	0.00469074	0.00569914	2.38882e-05	4.89881e-05
1.9	0.5	4	0.00112528	0.0190524	7.22e-06	2.49e-05	0.00476376	0.00584727	2.4994e-05	4.83719e-05
2	0.5	4	0.00110529	0.0195187	6.85e-06	2.58e-05	0.00483538	0.00597394	2.59343e-05	4.7856e-05
1.5	0.5	5	0.00129029	0.0146369	8.94e-06	1.55e-05	0.00442364	0.00479407	1.55882e-05	5.33104e-05
1.6	0.5	5	0.00125252	0.0158921	8.56e-06	1.81e-05	0.00449768	0.00492843	1.81546e-05	5.20093e-05
1.7	0.5	5	0.00121776	0.0168209	8.18e-06	2e-05	0.00457322	0.00520088	2.00898e-05	5.09853e-05
1.8	0.5	5	0.00118696	0.0175603	7.8e-06	2.15e-05	0.00464864	0.00541346	2.16291e-05	5.01478e-05
1.9	0.5	5	0.00115934	0.0181954	7.42e-06	2.28e-05	0.00472413	0.00559281	2.29413e-05	4.94169e-05
2	0.5	5	0.00114064	0.0186922	7.07e-06	2.39e-05	0.0047921	0.00573047	2.39491e-05	4.89044e-05
1.7	0.5	6	0.00126496	0.0152865	8.43e-06	1.67e-05	0.00452409	0.00496148	1.67251e-05	5.26774e-05
1.8	0.5	6	0.00123088	0.0163496	8.04e-06	1.88e-05	0.00460024	0.00508839	1.88967e-05	5.15503e-05
1.9	0.5	6	0.0011997	0.0171667	7.65e-06	2.05e-05	0.00467719	0.00528622	2.05753e-05	5.06459e-05
2	0.5	6	0.00117752	0.0177651	7.3e-06	2.17e-05	0.00474694	0.00545573	2.17892e-05	5.00261e-05
1.9	0.5	7	0.00124878	0.0156577	7.94e-06	1.72e-05	0.0046201	0.00512149	1.72755e-05	5.236e-05
2	0.5	7	0.00121783	0.0166162	7.55e-06	1.91e-05	0.00469758	0.00525064	1.92136e-05	5.13417e-05
1.2	1	-5	0.00087791	0.0224343	7.97e-06	3.54e-05	0.00461548	0.00692497	3.54915e-05	4.27404e-05
1.3	1	-5	0.000856638	0.0227538	7.56e-06	3.59e-05	0.00469471	0.00700192	3.60459e-05	4.24059e-05
1.4	1	-5	0.000840843	0.023047	7.17e-06	3.64e-05	0.00477184	0.00707103	3.65261e-05	4.2169e-05
1.5	1	-5	0.000823661	0.0233326	6.77e-06	3.68e-05	0.00485218	0.00713666	3.69607e-05	4.19166e-05
1.6	1	-5	0.000807315	0.0236089	6.35e-06	3.72e-05	0.0049338	0.00719885	3.73551e-05	4.16813e-05
1.7	1	-5	0.000792498	0.0238733	5.94e-06	3.76e-05	0.00501584	0.00725711	3.77068e-05	4.14779e-05
1.8	1	-5	0.000778843	0.0241295	5.52e-06	3.79e-05	0.0050984	0.00731251	3.80265e-05	4.1295e-05
1.9	1	-5	0.000764861	0.024381	5.09e-06	3.82e-05	0.00518302	0.00736574	3.83164e-05	4.11125e-05
2	1	-5	0.000753409	0.0246225	4.67e-06	3.84e-05	0.00526626	0.00741616	3.85803e-05	4.09715e-05
1.2	1	-4	0.000933588	0.0217964	8.17e-06	3.36e-05	0.00457458	0.0067389	3.3725e-05	4.37346e-05
1.3	1	-4	0.000911621	0.0221408	7.79e-06	3.42e-05	0.00465095	0.00682492	3.43715e-05	4.33566e-05
1.4	1	-4	0.000891796	0.0224604	7.4e-06	3.48e-05	0.00472816	0.00690269	3.49341e-05	4.30243e-05
1.5	1	-4	0.000875375	0.0227558	7.01e-06	3.53e-05	0.00480468	0.00697287	3.54225e-05	4.27591e-05
1.6	1	-4	0.000859458	0.0230392	6.61e-06	3.57e-05	0.00488272	0.00703873	3.58626e-05	4.25081e-05
1.7	1	-4	0.000844764	0.0233115	6.21e-06	3.61e-05	0.00496144	0.00710077	3.62616e-05	4.22813e-05
1.8	1	-4	0.00082933	0.0235791	5.8e-06	3.65e-05	0.00504277	0.00716047	3.66282e-05	4.20476e-05
1.9	1	-4	0.000817682	0.0238311	5.4e-06	3.68e-05	0.00512158	0.00721587	3.69579e-05	4.18784e-05
2	1	-4	0.000805219	0.0240817	4.99e-06	3.71e-05	0.00520282	0.00727005	3.72671e-05	4.16977e-05
1.2	1	-3	0.000984352	0.0211396	8.36e-06	3.18e-05	0.00453728	0.00654547	3.19162e-05	4.47148e-05
1.3	1	-3	0.000961619	0.0215193	7.99e-06	3.25e-05	0.00461115	0.00664368	3.26786e-05	4.42979e-05
1.4	1	-3	0.000940509	0.0218688	7.61e-06	3.32e-05	0.00468641	0.00673174	3.33408e-05	4.39195e-05
1.5	1	-3	0.000920039	0.0221962	7.22e-06	3.38e-05	0.00476367	0.00681215	3.39236e-05	4.35643e-05
1.6	1	-3	0.000904322	0.0224931	6.84e-06	3.43e-05	0.00483877	0.0068834	3.4422e-05	4.32962e-05
1.7	1	-3	0.000887245	0.022784	6.44e-06	3.47e-05	0.00491722	0.00695168	3.48816e-05	4.30101e-05
1.8	1	-3	0.000874084	0.0230521	6.05e-06	3.51e-05	0.00499344	0.00701334	3.52811e-05	4.2798e-05
1.9	1	-3	0.00085952	0.0233189	5.65e-06	3.55e-05	0.00507291	0.00707353	3.5656e-05	4.25643e-05
2	1	-3	0.000848865	0.0235678	5.26e-06	3.58e-05	0.00514937	0.00712884	3.599e-05	4.23977e-05
1.2	1	-2	0.0010398	0.0204074	8.57e-06	2.98e-05	0.00449655	0.00632898	2.99419e-05	4.58396e-05
1.3	1	-2	0.00101155	0.0208537	8.19e-06	3.08e-05	0.00457141	0.00644826	3.08869e-05	4.52903e-05
1.4	1	-2	0.000987152	0.0212501	7.81e-06	3.16e-05	0.00464643	0.0065515	3.16846e-05	4.48289e-05
1.5	1	-2	0.000965229	0.0216103	7.43e-06	3.22e-05	0.00472217	0.00664297	3.23709e-05	4.44265e-05
1.6	1	-2	0.000947472	0.0219349	7.05e-06	3.28e-05	0.0047965	0.00672345	3.2956e-05	4.41061e-05
1.7	1	-2	0.00093044	0.0222421	6.67e-06	3.33e-05	0.00487226	0.00679791	3.34795e-05	4.38053e-05
1.8	1	-2	0.000914781	0.0225327	6.28e-06	3.38e-05	0.00494859	0.00686686	3.39478e-05	4.35335e-05
1.9	1	-2	0.000899839	0.0228107	5.89e-06	3.42e-05	0.00502601	0.00693145	3.43699e-05	4.32809e-05
2	1	-2	0.000888446	0.0230683	5.51e-06	3.46e-05	0.00510091	0.00699024	3.47415e-05	4.30913e-05
1.2	1	-1	0.00109281	0.0196098	8.77e-06	2.77e-05	0.0044576	0.00609107	2.78241e-05	4.70155e-05
1.3	1	-1	0.00105995	0.0201398	8.38e-06	2.89e-05	0.00453289	0.00623698	2.89893e-05	4.63205e-05
1.4	1	-1	0.00103489	0.0205797	8.02e-06	2.98e-05	0.00460551	0.006355	2.99145e-05	4.58108e-05
1.5	1	-1	0.00101081	0.0209839	7.64e-06	3.06e-05	0.00468031	0.00646088	3.07273e-05	4.53393e-05
1.6	1	-1	0.000991044	0.0213426	7.27e-06	3.13e-05	0.00475382	0.00655265	3.14139e-05	4.49624e-05
1.7	1	-1	0.000971953	0.0216803	6.88e-06	3.19e-05	0.00482905	0.00663713	3.20288e-05	4.46074e-05
1.8	1	-1	0.000954042	0.0219977	6.5e-06	3.24e-05	0.00490533	0.0067148	3.25769e-05	4.42824e-05
1.9	1	-1	0.000938711	0.0222919	6.12e-06	3.29e-05	0.00498079	0.00678528	3.30582e-05	4.40089e-05
2	1	-1	0.000924515	0.0225718	5.73e-06	3.34e-05	0.00505674	0.00685102	3.34923e-05	4.37604e-05
1.2	1	0	0.00114082	0.0187195	8.94e-06	2.54e-05	0.00442233	0.00582277	2.55024e-05	4.82496e-05
1.3	1	0	0.0011088	0.0193349	8.58e-06	2.68e-05	0.00449401	0.00599699	2.68888e-05	4.74786e-05
1.4	1	0	0.00108123	0.0198517	8.22e-06	2.79e-05	0.0045658	0.00613977	2.80154e-05	4.68528e-05
1.5	1	0	0.00105706	0.0203012	7.85e-06	2.88e-05	0.00463783	0.00626106	2.89585e-05	4.63316e-05
1.6	1	0	0.00103307	0.0207166	7.47e-06	2.97e-05	0.00471265	0.00637057	2.97941e-05	4.58415e-05
1.7	1	0	0.0010129	0.0210861	7.1e-06	3.04e-05	0.00478644	0.00646578	3.05038e-05	4.5441e-05
1.8	1	0	0.000994575	0.021427	6.72e-06	3.1e-05	0.00486066	0.00655168	3.11279e-05	4.5089e-05
1.9	1	0	0.00097623	0.0217537	6.34e-06	3.16e-05	0.00493715	0.00663233	3.16983e-05	4.47464e-05
2	1	0	0.000961492	0.0220503	5.96e-06	3.21e-05	0.00501146	0.00670403	3.21899e-05	4.44754e-05
1.2	1	1	0.00119188	0.0176294	9.13e-06	2.27e-05	0.00438482	0.00549198	2.27589e-05	4.97104e-05
1.3	1	1	0.00115561	0.0184002	8.77e-06	2.44e-05	0.00445675	0.00571555	2.45008e-05	4.87584e-05
1.4	1	1	0.00112571	0.0190271	8.41e-06	2.58e-05	0.00452767	0.00589361	2.58966e-05	4.79967e-05
1.5	1	1	0.00109884	0.0195636	8.05e-06	2.7e-05	0.00459946	0.00604265	2.70598e-05	4.73493e-05
1.6	1	1	0.00107446	0.0200332	7.68e-06	2.79e-05	0.0046721	0.00617014	2.80432e-05	4.67937e-05
1.7	1	1	0.00105359	0.0204441	7.31e-06	2.88e-05	0.00474409	0.00627913	2.88694e-05	4.63378e-05
1.8	1	1	0.00103173	0.0208361	6.93e-06	2.95e-05	0.00481971	0.00638096	2.9627e-05	4.58845e-05
1.9	1	1	0.00101344	0.0211852	6.56e-06	3.01e-05	0.00489386	0.00646961	3.02698e-05	4.55185e-05
2	1	1	0.000999454	0.021495	6.2e-06	3.07e-05	0.00496498	0.0065466	3.08135e-05	4.52417e-05
1.2	1	2	0.00125065	0.0162763	9.35e-06	1.95e-05	0.00434164	0.00507931	1.95382e-05	5.14185e-05
1.3	1	2	0.00120287	0.0173039	8.96e-06	2.17e-05	0.00441913	0.00538313	2.18026e-05	5.01596e-05
1.4	1	2	0.00116854	0.018074	8.6e-06	2.34e-05	0.00449095	0.00560659	2.35079e-05	4.92425e-05
1.5	1	2	0.00113915	0.0187185	8.23e-06	2.48e-05	0.00456244	0.00579005	2.49218e-05	4.84719e-05
1.6	1	2	0.00111686	0.0192414	7.89e-06	2.59e-05	0.00463057	0.00593588	2.60443e-05	4.78919e-05
1.7	1	2	0.00109281	0.0197333	7.52e-06	2.7e-05	0.00470326	0.00607042	2.70739e-05	4.731e-05
1.8	1	2	0.00107277	0.020157	7.16e-06	2.78e-05	0.00477448	0.00618372	2.79282e-05	4.68434e-05
1.9	1	2	0.00105092	0.020566	6.78e-06	2.86e-05	0.00485026	0.00629091	2.8724e-05	4.63649e-05
2	1	2	0.00103305	0.020925	6.4e-06	2.93e-05	0.00492384	0.00638287	2.93909e-05	4.59857e-05
1.2	1	3	0.00131711	0.0143087	9.6e-06	1.52e-05	0.00429281	0.00457601	1.52228e-05	5.36393e-05
1.3	1	3	0.00126237	0.0158794	9.2e-06	1.84e-05	0.00437178	0.00494942	1.85046e-05	5.19124e-05
1.4	1	3	0.00121946	0.0169002	8.82e-06	2.06e-05	0.00444731	0.0052516	2.0701e-05	5.07351e-05
1.5	1	3	0.00118506	0.017689	8.45e-06	2.23e-05	0.00452028	0.00548076	2.24094e-05	4.98172e-05
1.6	1	3	0.00115295	0.0183836	8.07e-06	2.38e-05	0.00459522	0.00567912	2.39104e-05	4.89729e-05
1.7	1	3	0.00113071	0.0189242	7.72e-06	2.5e-05	0.00466381	0.00583046	2.50578e-05	4.83776e-05
1.8	1	3	0.00110744	0.0194318	7.35e-06	2.6e-05	0.00473628	0.00597004	2.6114e-05	4.7788e-05
1.9	1	3	0.00108715	0.0198782	6.99e-06	2.69e-05	0.00480811	0.00609034	2.70156e-05	4.72877e-05
2	1	3	0.00107063	0.0202648	6.64e-06	2.77e-05	0.00487782	0.00619227	2.7767e-05	4.68922e-05
1.4	1	4	0.00127411	0.0153941	9.05e-06	1.72e-05	0.00440047	0.00479259	1.73086e-05	5.24775e-05
1.5	1	4	0.00123164	0.0165155	8.66e-06	1.96e-05	0.0044775	0.00512587	1.96717e-05	5.1222e-05
1.6	1	4	0.00119664	0.0173427	8.29e-06	2.13e-05	0.00455242	0.00536662	2.1428e-05	5.02745e-05
1.7	1	4	0.00117041	0.0179892	7.93e-06	2.27e-05	0.00462249	0.00555135	2.27946e-05	4.95639e-05
1.8	1	4	0.0011458	0.01857	7.57e-06	2.39e-05	0.004694	0.00571461	2.40116e-05	4.89076e-05
1.9	1	4	0.00112224	0.0191025	7.2e-06	2.5e-05	0.0047673	0.00586184	2.51113e-05	4.82927e-05
2	1	4	0.00110219	0.0195666	6.83e-06	2.59e-05	0.00483918	0.00598773	2.6046e-05	4.77777e-05
1.5	1	5	0.00128682	0.0147542	8.92e-06	1.58e-05	0.00442683	0.00479938	1.58307e-05	5.31792e-05
1.6	1	5	0.00124894	0.015981	8.54e-06	1.83e-05	0.00450119	0.00495531	1.83478e-05	5.18972e-05
1.7	1	5	0.00121408	0.0168942	8.16e-06	2.02e-05	0.00457705	0.00522275	2.02527e-05	5.08833e-05
1.8	1	5	0.00118319	0.0176267	7.78e-06	2.17e-05	0.0046528	0.00543304	2.17783e-05	5.00489e-05
1.9	1	5	0.00116085	0.0181974	7.42e-06	2.29e-05	0.00472238	0.00559379	2.29527e-05	4.94416e-05
2	1	5	0.00113752	0.0187446	7.05e-06	2.4e-05	0.00479591	0.00574569	2.40689e-05	4.88233e-05
1.7	1	6	0.00126131	0.0153939	8.41e-06	1.69e-05	0.00452789	0.00496781	1.69504e-05	5.25501e-05
1.8	1	6	0.00123229	0.0163512	8.05e-06	1.88e-05	0.00459868	0.00508581	1.89053e-05	5.15738e-05
1.9	1	6	0.00120107	0.0171683	7.66e-06	2.05e-05	0.0046756	0.00528705	2.05844e-05	5.06685e-05
2	1	6	0.00117363	0.017832	7.28e-06	2.18e-05	0.0047517	0.00547527	2.19369e-05	4.99253e-05
1.9	1	7	0.00124501	0.0157633	7.92e-06	1.74e-05	0.00462448	0.00512881	1.7497e-05	5.2231e-05
2	1	7	0.00121398	0.016702	7.53e-06	1.93e-05	0.00470229	0.00525848	1.9398e-05	5.12265e-05
1.2	1.5	-5	0.000873653	0.0224782	7.95e-06	3.55e-05	0.00461861	0.00693768	3.56127e-05	4.26685e-05
1.3	1.5	-5	0.000854732	0.0227909	7.56e-06	3.6e-05	0.00469622	0.00701294	3.61548e-05	4.23752e-05
1.4	1.5	-5	0.000835998	0.0230909	7.15e-06	3.65e-05	0.00477599	0.00708338	3.66412e-05	4.20908e-05
1.5	1.5	-5	0.00081855	0.0233766	6.74e-06	3.69e-05	0.00485687	0.00714883	3.70724e-05	4.18359e-05
1.6	1.5	-5	0.000801962	0.0236515	6.33e-06	3.73e-05	0.00493904	0.00721042	3.7459e-05	4.1602e-05
1.7	1.5	-5	0.00078739	0.0239153	5.91e-06	3.77e-05	0.00502115	0.00726842	3.78079e-05	4.14036e-05
1.8	1.5	-5	0.000774475	0.0241687	5.5e-06	3.8e-05	0.00510322	0.00732308	3.81215e-05	4.12351e-05
1.9	1.5	-5	0.000760307	0.0244209	5.07e-06	3.83e-05	0.00518832	0.00737636	3.84103e-05	4.10494e-05
2	1.5	-5	0.000748693	0.0246615	4.64e-06	3.85e-05	0.00527203	0.00742635	3.86683e-05	4.09092e-05
1.2	1.5	-4	0.000930956	0.0218314	8.16e-06	3.37e-05	0.00457651	0.00674921	3.38228e-05	4.36838e-05
1.3	1.5	-4	0.000908766	0.0221744	7.77e-06	3.43e-05	0.00465322	0.00683466	3.44632e-05	4.33056e-05
1.4	1.5	-4	0.000888742	0.0224932	7.38e-06	3.49e-05	0.00473078	0.00691206	3.50214e-05	4.29719e-05
1.5	1.5	-4	0.000872144	0.0227883	6.99e-06	3.54e-05	0.00480765	0.00698205	3.55071e-05	4.2705e-05
1.6	1.5	-4	0.000856064	0.023072	6.6e-06	3.58e-05	0.00488605	0.00704787	3.59459e-05	4.24514e-05
1.7	1.5	-4	0.000841219	0.0233443	6.2e-06	3.62e-05	0.00496512	0.00710978	3.63426e-05	4.22233e-05
1.8	1.5	-4	0.000828207	0.023605	5.8e-06	3.66e-05	0.005044	0.007168	3.67016e-05	4.20291e-05
1.9	1.5	-4	0.000813861	0.0238641	5.38e-06	3.69e-05	0.00512602	0.0072247	3.70349e-05	4.18183e-05
2	1.5	-4	0.000801275	0.0241145	4.97e-06	3.72e-05	0.00520765	0.00727865	3.73406e-05	4.16381e-05
1.2	1.5	-3	0.000983405	0.021166	8.36e-06	3.19e-05	0.00453798	0.00655347	3.19924e-05	4.46922e-05
1.3	1.5	-3	0.000958285	0.0215536	7.97e-06	3.26e-05	0.0046138	0.00665356	3.27687e-05	4.42339e-05
1.4	1.5	-3	0.000939273	0.0218932	7.6e-06	3.33e-05	0.00468747	0.00673899	3.34097e-05	4.38953e-05
1.5	1.5	-3	0.000918672	0.0222204	7.21e-06	3.39e-05	0.00476492	0.00681923	3.39905e-05	4.35379e-05
1.6	1.5	-3	0.000900524	0.0225253	6.82e-06	3.44e-05	0.00484249	0.00689228	3.45003e-05	4.32277e-05
1.7	1.5	-3	0.000885661	0.0228072	6.43e-06	3.48e-05	0.00491887	0.00695832	3.49435e-05	4.29822e-05
1.8	1.5	-3	0.000872406	0.0230755	6.04e-06	3.52e-05	0.00499529	0.00701996	3.53423e-05	4.27684e-05
1.9	1.5	-3	0.00085775	0.0233425	5.64e-06	3.56e-05	0.00507497	0.00708013	3.57165e-05	4.25332e-05
2	1.5	-3	0.000847019	0.023591	5.25e-06	3.59e-05	0.00515163	0.00713528	3.60483e-05	4.23671e-05
1.2	1.5	-2	0.00103675	0.0204423	8.56e-06	2.99e-05	0.00449879	0.00633925	3.00336e-05	4.57781e-05
1.3	1.5	-2	0.00101007	0.0208794	8.18e-06	3.08e-05	0.00457259	0.00645589	3.09569e-05	4.52587e-05
1.4	1.5	-2	0.000985544	0.0212747	7.8e-06	3.16e-05	0.00464781	0.00655873	3.1751e-05	4.47967e-05
1.5	1.5	-2	0.000963508	0.0216345	7.42e-06	3.23e-05	0.00472375	0.00664998	3.24349e-05	4.43928e-05
1.6	1.5	-2	0.000945653	0.0219586	7.04e-06	3.29e-05	0.00479829	0.00673024	3.30177e-05	4.40709e-05
1.7	1.5	-2	0.00092853	0.0222652	6.66e-06	3.34e-05	0.00487425	0.00680448	3.35387e-05	4.37697e-05
1.8	1.5	-2	0.000912786	0.022555	6.27e-06	3.39e-05	0.00495079	0.00687311	3.40034e-05	4.34984e-05
1.9	1.5	-2	0.000897766	0.0228334	5.88e-06	3.43e-05	0.00502842	0.00693771	3.44253e-05	4.32436e-05
2	1.5	-2	0.000886307	0.0230908	5.49e-06	3.47e-05	0.00510353	0.0069964	3.47953e-05	4.30531e-05
1.2	1.5	-1	0.00108961	0.019648	8.75e-06	2.78e-05	0.00445995	0.00610238	2.79219e-05	4.69463e-05
1.3	1.5	-1	0.00105937	0.0201598	8.38e-06	2.89e-05	0.00453335	0.00624308	2.90449e-05	4.63049e-05
1.4	1.5	-1	0.0010314	0.0206141	8e-06	2.99e-05	0.0046085	0.00636488	3.00001e-05	4.57419e-05
1.5	1.5	-1	0.00101005	0.0210032	7.63e-06	3.07e-05	0.004681	0.00646665	3.07805e-05	4.53203e-05
1.6	1.5	-1	0.000989027	0.0213672	7.26e-06	3.14e-05	0.0047558	0.00655969	3.14763e-05	4.49216e-05
1.7	1.5	-1	0.000969855	0.0217036	6.87e-06	3.2e-05	0.00483124	0.00664372	3.20866e-05	4.45683e-05
1.8	1.5	-1	0.000953943	0.0220112	6.5e-06	3.25e-05	0.00490544	0.0067189	3.26163e-05	4.42783e-05
1.9	1.5	-1	0.000936464	0.0223145	6.1e-06	3.3e-05	0.0049834	0.00679149	3.31116e-05	4.39688e-05
2	1.5	-1	0.000922206	0.0225942	5.72e-06	3.34e-05	0.00505957	0.0068571	3.3544e-05	4.37192e-05
1.2	1.5	0	0.00114014	0.0187439	8.94e-06	2.55e-05	0.00442283	0.00583025	2.55669e-05	4.82255e-05
1.3	1.5	0	0.00110539	0.0193761	8.57e-06	2.69e-05	0.00449672	0.00600911	2.69914e-05	4.74003e-05
1.4	1.5	0	0.0010777	0.0198895	8.2e-06	2.8e-05	0.00456882	0.00615073	2.81084e-05	4.67779e-05
1.5	1.5	0	0.00105342	0.0203372	7.84e-06	2.89e-05	0.00464117	0.00627134	2.90455e-05	4.62572e-05
1.6	1.5	0	0.00103206	0.0207354	7.47e-06	2.97e-05	0.00471364	0.00637614	2.98437e-05	4.58187e-05
1.7	1.5	0	0.00101183	0.0211041	7.09e-06	3.04e-05	0.00478755	0.00647102	3.05505e-05	4.54194e-05
1.8	1.5	0	0.000993446	0.0214451	6.72e-06	3.11e-05	0.0048619	0.00655693	3.11746e-05	4.50651e-05
1.9	1.5	0	0.000975872	0.0217673	6.34e-06	3.16e-05	0.00493756	0.00663638	3.17359e-05	4.47365e-05
2	1.5	0	0.000961095	0.0220638	5.96e-06	3.21e-05	0.00501195	0.00670802	3.2227e-05	4.4465e-05
1.2	1.5	1	0.00118859	0.0176821	9.12e-06	2.28e-05	0.00438723	0.00550785	2.2886e-05	4.96243e-05
1.3	1.5	1	0.00115219	0.0184487	8.76e-06	2.45e-05	0.00445947	0.00573001	2.46193e-05	4.86722e-05
1.4	1.5	1	0.00112218	0.0190713	8.4e-06	2.59e-05	0.00453069	0.0059066	2.60042e-05	4.79136e-05
1.5	1.5	1	0.0010952	0.0196046	8.03e-06	2.71e-05	0.0046028	0.00605451	2.71586e-05	4.72681e-05
1.6	1.5	1	0.00107334	0.0200538	7.67e-06	2.8e-05	0.00467321	0.00617623	2.8096e-05	4.6766e-05
1.7	1.5	1	0.00104978	0.0204808	7.29e-06	2.88e-05	0.00474806	0.00628947	2.8955e-05	4.62592e-05
1.8	1.5	1	0.00103315	0.0208386	6.94e-06	2.95e-05	0.00481815	0.00638213	2.96417e-05	4.59073e-05
1.9	1.5	1	0.00101483	0.0211877	6.56e-06	3.02e-05	0.00489224	0.00647075	3.02846e-05	4.55407e-05
2	1.5	1	0.000995426	0.0215289	6.17e-06	3.08e-05	0.00496991	0.0065557	3.08867e-05	4.51648e-05
1.2	1.5	2	0.00124654	0.0163464	9.34e-06	1.96e-05	0.00434466	0.00510058	1.96972e-05	5.13127e-05
1.3	1.5	2	0.00120425	0.0173062	8.97e-06	2.17e-05	0.00441803	0.0053841	2.18124e-05	5.01824e-05
1.4	1.5	2	0.00116988	0.0180764	8.6e-06	2.34e-05	0.00448981	0.00560757	2.35184e-05	4.92645e-05
1.5	1.5	2	0.00114045	0.0187207	8.24e-06	2.48e-05	0.00456124	0.00579103	2.49327e-05	4.84931e-05
1.6	1.5	2	0.00111316	0.019286	7.87e-06	2.6e-05	0.00463419	0.00594881	2.615e-05	4.78057e-05
1.7	1.5	2	0.00108904	0.0197752	7.5e-06	2.71e-05	0.00470719	0.00608239	2.71719e-05	4.72254e-05
1.8	1.5	2	0.00106893	0.020197	7.14e-06	2.79e-05	0.00477872	0.00619497	2.802e-05	4.67595e-05
1.9	1.5	2	0.00105212	0.020568	6.78e-06	2.86e-05	0.00484886	0.00629187	2.87361e-05	4.63843e-05
2	1.5	2	0.00103424	0.0209269	6.41e-06	2.93e-05	0.00492239	0.0063838	2.94029e-05	4.60047e-05
1.2	1.5	3	0.00131308	0.014421	9.58e-06	1.54e-05	0.00429577	0.00458095	1.5455e-05	5.35038e-05
1.3	1.5	3	0.0012582	0.0159579	9.18e-06	1.86e-05	0.0043751	0.0049732	1.86776e-05	5.17977e-05
1.4	1.5	3	0.00122064	0.016902	8.82e-06	2.06e-05	0.0044463	0.00525239	2.0709e-05	5.07548e-05
1.5	1.5	3	0.00118163	0.0177408	8.43e-06	2.24e-05	0.00452343	0.00549613	2.25293e-05	4.97307e-05
1.6	1.5	3	0.00115406	0.0183853	8.07e-06	2.38e-05	0.00459413	0.00567991	2.39192e-05	4.89911e-05
1.7	1.5	3	0.00112699	0.0189725	7.7e-06	2.51e-05	0.00466769	0.00584444	2.51701e-05	4.82869e-05
1.8	1.5	3	0.00110851	0.0194335	7.36e-06	2.6e-05	0.00473509	0.00597083	2.61236e-05	4.78054e-05
1.9	1.5	3	0.00108821	0.0198798	7e-06	2.69e-05	0.00480689	0.00609111	2.70253e-05	4.73047e-05
2	1.5	3	0.00106672	0.0203061	6.61e-06	2.77e-05	0.00488261	0.00620378	2.78593e-05	4.68065e-05
1.4	1.5	4	0.00127517	0.0153955	9.06e-06	1.72e-05	0.00439956	0.00479321	1.73144e-05	5.24953e-05
1.5	1.5	4	0.00123267	0.016517	8.67e-06	1.96e-05	0.00447656	0.00512653	1.96783e-05	5.12391e-05
1.6	1.5	4	0.00119764	0.0173441	8.29e-06	2.13e-05	0.00455145	0.00536727	2.14349e-05	5.0291e-05
1.7	1.5	4	0.00117139	0.0179907	7.94e-06	2.27e-05	0.00462148	0.00555202	2.2802e-05	4.95798e-05
1.8	1.5	4	0.00114207	0.0186205	7.55e-06	2.4e-05	0.00469812	0.00572923	2.41263e-05	4.88176e-05
1.9	1.5	4	0.00112318	0.0191038	7.2e-06	2.5e-05	0.00476621	0.0058625	2.51193e-05	4.83078e-05
2	1.5	4	0.00110311	0.0195678	6.84e-06	2.6e-05	0.00483805	0.00598838	2.6054e-05	4.77926e-05
1.5	1.5	5	0.00128775	0.0147553	8.93e-06	1.58e-05	0.00442597	0.00479795	1.58354e-05	5.31948e-05
1.6	1.5	5	0.00124985	0.0159822	8.55e-06	1.83e-05	0.0045003	0.00495584	1.83531e-05	5.19123e-05
1.7	1.5	5	0.00121496	0.0168954	8.17e-06	2.02e-05	0.00457613	0.00522332	2.02586e-05	5.08981e-05
1.8	1.5	5	0.00118404	0.0176279	7.78e-06	2.17e-05	0.00465186	0.00543361	2.17845e-05	5.0063e-05
1.9	1.5	5	0.00116169	0.0181985	7.43e-06	2.29e-05	0.0047214	0.00559435	2.29592e-05	4.94554e-05
2	1.5	5	0.00113835	0.0187457	7.06e-06	2.4e-05	0.0047949	0.00574625	2.40756e-05	4.88369e-05
1.7	1.5	6	0.00126211	0.0153949	8.41e-06	1.69e-05	0.00452705	0.00496642	1.69548e-05	5.25635e-05
1.8	1.5	6	0.00122792	0.0164359	8.03e-06	1.9e-05	0.0046035	0.00509383	1.90867e-05	5.14499e-05
1.9	1.5	6	0.00120183	0.0171692	7.67e-06	2.05e-05	0.00467471	0.00528751	2.05895e-05	5.0681e-05
2	1.5	6	0.00117438	0.0178329	7.28e-06	2.19e-05	0.00475079	0.00547574	2.19423e-05	4.99375e-05
1.9	1.5	7	0.00124571	0.015764	7.92e-06	1.74e-05	0.00462367	0.00512745	1.75008e-05	5.22425e-05
2	1.5	7	0.00121466	0.0167027	7.53e-06	1.93e-05	0.00470146	0.00525709	1.94022e-05	5.12376e-05
1.2	2	-5	0.000872242	0.0224885	7.94e-06	3.55e-05	0.00461965	0.00694058	3.56393e-05	4.26442e-05
1.3	2	-5	0.000853251	0.0228011	7.55e-06	3.6e-05	0.0046974	0.00701574	3.61802e-05	4.23502e-05
1.4	2	-5	0.000834453	0.0231003	7.15e-06	3.65e-05	0.00477731	0.00708588	3.66631e-05	4.20676e-05
1.5	2	-5	0.000816946	0.0233857	6.74e-06	3.69e-05	0.00485834	0.00715124	3.70929e-05	4.18126e-05
1.6	2	-5	0.000803086	0.0236548	6.33e-06	3.73e-05	0.00493794	0.00721172	3.7476e-05	4.16208e-05
1.7	2	-5	0.000788493	0.0239185	5.92e-06	3.77e-05	0.00502	0.00726971	3.7825e-05	4.14222e-05
1.8	2	-5	0.000773903	0.0241757	5.49e-06	3.8e-05	0.00510385	0.00732502	3.81398e-05	4.12277e-05
1.9	2	-5	0.000761371	0.024424	5.07e-06	3.83e-05	0.00518708	0.00737763	3.84274e-05	4.10677e-05
2	2	-5	0.000749741	0.0246645	4.65e-06	3.85e-05	0.00527075	0.00742761	3.86854e-05	4.09274e-05
1.2	2	-4	0.00092945	0.021841	8.16e-06	3.37e-05	0.00457762	0.00675187	3.38463e-05	4.3658e-05
1.3	2	-4	0.000909626	0.0221767	7.78e-06	3.43e-05	0.00465253	0.00683556	3.44742e-05	4.33196e-05
1.4	2	-4	0.000889584	0.0224955	7.39e-06	3.49e-05	0.00473006	0.00691296	3.50327e-05	4.29858e-05
1.5	2	-4	0.00087297	0.0227905	7e-06	3.54e-05	0.00480689	0.00698292	3.55182e-05	4.27185e-05
1.6	2	-4	0.000856876	0.0230742	6.6e-06	3.58e-05	0.00488525	0.00704875	3.59573e-05	4.24648e-05
1.7	2	-4	0.000839466	0.0233537	6.19e-06	3.62e-05	0.00496695	0.00711217	3.63616e-05	4.21946e-05
1.8	2	-4	0.000826416	0.0236141	5.79e-06	3.66e-05	0.00504598	0.00717023	3.67185e-05	4.20014e-05
1.9	2	-4	0.000814632	0.0238661	5.39e-06	3.69e-05	0.00512513	0.00722554	3.70463e-05	4.18312e-05
2	2	-4	0.000802034	0.0241164	4.97e-06	3.72e-05	0.00520672	0.00727948	3.73519e-05	4.16507e-05
1.2	2	-3	0.000984077	0.0211677	8.36e-06	3.19e-05	0.00453748	0.00655413	3.20002e-05	4.47031e-05
1.3	2	-3	0.00095894	0.0215553	7.98e-06	3.26e-05	0.00461328	0.00665421	3.27765e-05	4.42444e-05
1.4	2	-3	0.000937645	0.021903	7.59e-06	3.33e-05	0.00468886	0.00674164	3.34321e-05	4.38665e-05
1.5	2	-3	0.000919299	0.0222219	7.21e-06	3.39e-05	0.00476435	0.00681986	3.39985e-05	4.35481e-05
1.6	2	-3	0.000901139	0.0225268	6.82e-06	3.44e-05	0.00484189	0.0068929	3.45082e-05	4.32378e-05
1.7	2	-3	0.000886266	0.0228087	6.43e-06	3.48e-05	0.00491824	0.00695894	3.49515e-05	4.29921e-05
1.8	2	-3	0.000870629	0.0230849	6.03e-06	3.52e-05	0.00499725	0.00702231	3.53603e-05	4.27383e-05
1.9	2	-3	0.000858336	0.0233438	5.64e-06	3.56e-05	0.00507429	0.00708073	3.57245e-05	4.25427e-05
2	2	-3	0.000845184	0.0236002	5.24e-06	3.59e-05	0.00515388	0.00713746	3.60638e-05	4.23375e-05
1.2	2	-2	0.00103728	0.0204436	8.56e-06	2.99e-05	0.0044984	0.00633975	3.00393e-05	4.57868e-05
1.3	2	-2	0.00101059	0.0208806	8.19e-06	3.08e-05	0.00457217	0.00645637	3.09627e-05	4.52671e-05
1.4	2	-2	0.000986052	0.0212759	7.8e-06	3.16e-05	0.00464737	0.00655921	3.17568e-05	4.48048e-05
1.5	2	-2	0.000964004	0.0216356	7.42e-06	3.23e-05	0.00472329	0.00665045	3.24407e-05	4.44007e-05
1.6	2	-2	0.000943973	0.0219689	7.03e-06	3.29e-05	0.00479993	0.00673298	3.30401e-05	4.40402e-05
1.7	2	-2	0.000926819	0.0222754	6.65e-06	3.34e-05	0.00487603	0.00680712	3.35598e-05	4.37387e-05
1.8	2	-2	0.000913256	0.0225561	6.27e-06	3.39e-05	0.00495027	0.00687357	3.40094e-05	4.3506e-05
1.9	2	-2	0.000898229	0.0228344	5.88e-06	3.43e-05	0.00502788	0.00693817	3.44313e-05	4.32511e-05
2	2	-2	0.000886764	0.0230918	5.5e-06	3.47e-05	0.00510297	0.00699684	3.48013e-05	4.30606e-05
1.2	2	-1	0.00109005	0.019649	8.76e-06	2.78e-05	0.00445962	0.00610276	2.79262e-05	4.69535e-05
1.3	2	-1	0.00105702	0.0201763	8.37e-06	2.9e-05	0.00453522	0.00624771	2.90835e-05	4.62595e-05
1.4	2	-1	0.00103182	0.020615	8e-06	2.99e-05	0.00460814	0.00636524	3.00044e-05	4.57486e-05
1.5	2	-1	0.00101046	0.0210041	7.64e-06	3.07e-05	0.00468063	0.00646702	3.07849e-05	4.53268e-05
1.6	2	-1	0.000989426	0.021368	7.26e-06	3.14e-05	0.00475541	0.00656005	3.14807e-05	4.49279e-05
1.7	2	-1	0.000970246	0.0217045	6.88e-06	3.2e-05	0.00483083	0.00664408	3.20912e-05	4.45746e-05
1.8	2	-1	0.000954327	0.0220121	6.5e-06	3.25e-05	0.00490501	0.00671926	3.2621e-05	4.42846e-05
1.9	2	-1	0.000936842	0.0223152	6.11e-06	3.3e-05	0.00498296	0.00679182	3.3116e-05	4.39747e-05
2	2	-1	0.000922578	0.022595	5.72e-06	3.34e-05	0.00505911	0.00685744	3.35487e-05	4.37252e-05
1.2	2	0	0.00114051	0.0187447	8.94e-06	2.55e-05	0.00442256	0.00583055	2.55701e-05	4.82316e-05
1.3	2	0	0.00110575	0.0193768	8.57e-06	2.69e-05	0.00449644	0.00600939	2.69946e-05	4.74062e-05
1.4	2	0	0.00107805	0.0198902	8.2e-06	2.8e-05	0.00456852	0.00615104	2.81119e-05	4.67836e-05
1.5	2	0	0.00105376	0.0203379	7.84e-06	2.89e-05	0.00464086	0.00627164	2.9049e-05	4.62628e-05
1.6	2	0	0.0010324	0.0207361	7.47e-06	2.97e-05	0.00471331	0.00637642	2.98472e-05	4.58243e-05
1.7	2	0	0.0010094	0.0211203	7.08e-06	3.05e-05	0.00479008	0.00647535	3.0585e-05	4.5373e-05
1.8	2	0	0.000990978	0.0214604	6.7e-06	3.11e-05	0.00486462	0.00656091	3.12054e-05	4.50207e-05
1.9	2	0	0.000974202	0.021778	6.33e-06	3.16e-05	0.0049395	0.00663916	3.17574e-05	4.47069e-05
2	2	0	0.000961405	0.0220644	5.96e-06	3.21e-05	0.00501157	0.0067083	3.22307e-05	4.447e-05
1.2	2	1	0.0011889	0.0176827	9.12e-06	2.28e-05	0.004387	0.00550809	2.28884e-05	4.96295e-05
1.3	2	1	0.0011525	0.0184493	8.76e-06	2.45e-05	0.00445923	0.00573023	2.46217e-05	4.8677e-05
1.4	2	1	0.00112247	0.0190718	8.4e-06	2.59e-05	0.00453044	0.00590683	2.60068e-05	4.79184e-05
1.5	2	1	0.00109549	0.0196051	8.03e-06	2.71e-05	0.00460253	0.00605475	2.71613e-05	4.72729e-05
1.6	2	1	0.00107362	0.0200543	7.68e-06	2.8e-05	0.00467293	0.00617645	2.80987e-05	4.67704e-05
1.7	2	1	0.00105006	0.0204813	7.3e-06	2.88e-05	0.00474776	0.00628969	2.89578e-05	4.62637e-05
1.8	2	1	0.00103342	0.0208391	6.94e-06	2.95e-05	0.00481785	0.00638235	2.96445e-05	4.59116e-05
1.9	2	1	0.0010151	0.0211882	6.57e-06	3.02e-05	0.00489193	0.00647098	3.02875e-05	4.55452e-05
2	2	1	0.000995691	0.0215294	6.17e-06	3.08e-05	0.00496959	0.00655592	3.08896e-05	4.51691e-05
1.2	2	2	0.00124682	0.0163469	9.34e-06	1.96e-05	0.00434445	0.00510077	1.9699e-05	5.13173e-05
1.3	2	2	0.00120452	0.0173067	8.97e-06	2.17e-05	0.00441782	0.00538429	2.18144e-05	5.01869e-05
1.4	2	2	0.00117014	0.0180768	8.6e-06	2.34e-05	0.00448959	0.00560776	2.35204e-05	4.92687e-05
1.5	2	2	0.00114071	0.0187212	8.24e-06	2.48e-05	0.00456101	0.00579122	2.49348e-05	4.84972e-05
1.6	2	2	0.00111341	0.0192864	7.87e-06	2.6e-05	0.00463395	0.00594899	2.61521e-05	4.78097e-05
1.7	2	2	0.00108928	0.0197756	7.5e-06	2.71e-05	0.00470694	0.00608256	2.7174e-05	4.72292e-05
1.8	2	2	0.00106916	0.0201974	7.14e-06	2.79e-05	0.00477846	0.00619516	2.80223e-05	4.67633e-05
1.9	2	2	0.00105236	0.0205684	6.79e-06	2.86e-05	0.00484859	0.00629204	2.87383e-05	4.63879e-05
2	2	2	0.00103446	0.0209273	6.41e-06	2.93e-05	0.00492211	0.00638399	2.94054e-05	4.60084e-05
1.2	2	3	0.00131332	0.0144213	9.59e-06	1.54e-05	0.00429559	0.00458065	1.54562e-05	5.3508e-05
1.3	2	3	0.00125843	0.0159582	9.18e-06	1.86e-05	0.00437491	0.00497335	1.8679e-05	5.18016e-05
1.4	2	3	0.00121539	0.0169672	8.8e-06	2.08e-05	0.00445079	0.00527169	2.08536e-05	5.0631e-05
1.5	2	3	0.00118186	0.0177412	8.43e-06	2.24e-05	0.00452322	0.00549628	2.25309e-05	4.97343e-05
1.6	2	3	0.00115428	0.0183857	8.08e-06	2.38e-05	0.00459392	0.00568007	2.3921e-05	4.89948e-05
1.7	2	3	0.0011272	0.0189728	7.7e-06	2.51e-05	0.00466747	0.0058446	2.51719e-05	4.82903e-05
1.8	2	3	0.00110872	0.0194338	7.36e-06	2.6e-05	0.00473486	0.00597098	2.61254e-05	4.78088e-05
1.9	2	3	0.00108841	0.0198802	7e-06	2.69e-05	0.00480665	0.00609127	2.70272e-05	4.73081e-05
2	2	3	0.00106692	0.0203064	6.61e-06	2.78e-05	0.00488236	0.00620393	2.78612e-05	4.68097e-05
1.4	2	4	0.00127538	0.0153958	9.06e-06	1.72e-05	0.00439938	0.00479334	1.73156e-05	5.24989e-05
1.5	2	4	0.00123287	0.0165172	8.67e-06	1.96e-05	0.00447637	0.00512664	1.96795e-05	5.12424e-05
1.6	2	4	0.00119783	0.0173444	8.29e-06	2.14e-05	0.00455126	0.00536741	2.14363e-05	5.02942e-05
1.7	2	4	0.00116885	0.0180213	7.92e-06	2.28e-05	0.00462412	0.0055609	2.287e-05	4.95199e-05
1.8	2	4	0.00114225	0.0186208	7.55e-06	2.4e-05	0.00469791	0.00572936	2.41278e-05	4.88206e-05
1.9	2	4	0.00112336	0.0191041	7.2e-06	2.5e-05	0.004766	0.00586264	2.51209e-05	4.83109e-05
2	2	4	0.00110329	0.0195681	6.84e-06	2.6e-05	0.00483784	0.00598851	2.60556e-05	4.77955e-05
1.5	2	5	0.00128793	0.0147555	8.93e-06	1.58e-05	0.00442581	0.00479768	1.58363e-05	5.31979e-05
1.6	2	5	0.00125002	0.0159824	8.55e-06	1.83e-05	0.00450013	0.00495594	1.83541e-05	5.19152e-05
1.7	2	5	0.00121513	0.0168956	8.17e-06	2.02e-05	0.00457595	0.00522342	2.02597e-05	5.09008e-05
1.8	2	5	0.00118421	0.0176281	7.78e-06	2.17e-05	0.00465168	0.00543371	2.17857e-05	5.00657e-05
1.9	2	5	0.00115917	0.0182296	7.41e-06	2.29e-05	0.00472433	0.00560326	2.30267e-05	4.93953e-05
2	2	5	0.00113851	0.0187459	7.06e-06	2.4e-05	0.00479471	0.00574635	2.40768e-05	4.88395e-05
1.7	2	6	0.00126227	0.015395	8.41e-06	1.69e-05	0.00452689	0.00496615	1.69557e-05	5.25661e-05
1.8	2	6	0.00122807	0.0164361	8.03e-06	1.9e-05	0.00460333	0.00509355	1.90877e-05	5.14525e-05
1.9	2	6	0.00120198	0.0171694	7.67e-06	2.05e-05	0.00467454	0.0052876	2.05905e-05	5.06835e-05
2	2	6	0.00117452	0.0178331	7.28e-06	2.19e-05	0.00475061	0.00547582	2.19433e-05	4.99398e-05
1.9	2	7	0.00124584	0.0157642	7.93e-06	1.74e-05	0.00462351	0.00512719	1.75016e-05	5.22448e-05
2	2	7	0.0012148	0.0167029	7.53e-06	1.93e-05	0.00470129	0.00525682	1.94031e-05	5.124e-05
1.2	2.5	-5	0.000876274	0.0224577	7.96e-06	3.54e-05	0.00461669	0.00693188	3.55589e-05	4.27125e-05
1.3	2.5	-5	0.000854829	0.0227774	7.56e-06	3.6e-05	0.00469615	0.0070088	3.61125e-05	4.23751e-05
1.4	2.5	-5	0.00083619	0.0230765	7.15e-06	3.65e-05	0.00477583	0.007079	3.65964e-05	4.20945e-05
1.5	2.5	-5	0.000821569	0.0233556	6.76e-06	3.69e-05	0.0048541	0.00714317	3.70222e-05	4.18848e-05
1.6	2.5	-5	0.000805094	0.0236312	6.34e-06	3.73e-05	0.00493598	0.00720507	3.7413e-05	4.16497e-05
1.7	2.5	-5	0.000789923	0.0238967	5.93e-06	3.76e-05	0.00501852	0.0072635	3.7765e-05	4.14408e-05
1.8	2.5	-5	0.000775448	0.0241542	5.5e-06	3.79e-05	0.00510214	0.00731898	3.80821e-05	4.12468e-05
1.9	2.5	-5	0.000763013	0.024402	5.08e-06	3.82e-05	0.00518517	0.00737148	3.83694e-05	4.1089e-05
2	2.5	-5	0.000749797	0.0246472	4.65e-06	3.85e-05	0.00527068	0.00742241	3.86315e-05	4.09219e-05
1.2	2.5	-4	0.000931439	0.0218185	8.17e-06	3.37e-05	0.00457616	0.0067453	3.37846e-05	4.3695e-05
1.3	2.5	-4	0.000909332	0.0221621	7.78e-06	3.43e-05	0.00465277	0.00683099	3.44275e-05	4.33166e-05
1.4	2.5	-4	0.000889384	0.0224811	7.39e-06	3.48e-05	0.00473023	0.00690848	3.49868e-05	4.29839e-05
1.5	2.5	-4	0.000872853	0.0227763	7e-06	3.53e-05	0.004807	0.00697855	3.54734e-05	4.27174e-05
1.6	2.5	-4	0.000856834	0.0230604	6.6e-06	3.58e-05	0.00488529	0.00704454	3.59142e-05	4.24635e-05
1.7	2.5	-4	0.000842045	0.0233324	6.2e-06	3.62e-05	0.00496426	0.0071064	3.63106e-05	4.22368e-05
1.8	2.5	-4	0.000829085	0.0235926	5.8e-06	3.65e-05	0.00504304	0.00716451	3.66688e-05	4.20442e-05
1.9	2.5	-4	0.000814791	0.0238522	5.39e-06	3.69e-05	0.00512494	0.00722137	3.70041e-05	4.18326e-05
2	2.5	-4	0.000802252	0.0241025	4.97e-06	3.72e-05	0.00520645	0.00727536	3.73104e-05	4.16525e-05
1.2	2.5	-3	0.000986348	0.0211447	8.37e-06	3.18e-05	0.00453582	0.00654743	3.19392e-05	4.47472e-05
1.3	2.5	-3	0.000961337	0.0215328	7.99e-06	3.26e-05	0.00461137	0.00664777	3.27183e-05	4.42902e-05
1.4	2.5	-3	0.000937888	0.0218897	7.6e-06	3.33e-05	0.00468866	0.0067376	3.33926e-05	4.38729e-05
1.5	2.5	-3	0.000919611	0.0222089	7.21e-06	3.38e-05	0.00476406	0.00681594	3.39602e-05	4.35552e-05
1.6	2.5	-3	0.000903836	0.0225056	6.83e-06	3.43e-05	0.00483925	0.0068871	3.44577e-05	4.32865e-05
1.7	2.5	-3	0.0008867	0.022796	6.44e-06	3.48e-05	0.00491779	0.00695521	3.49154e-05	4.30006e-05
1.8	2.5	-3	0.000873488	0.0230649	6.05e-06	3.52e-05	0.0049941	0.00701705	3.53165e-05	4.27858e-05
1.9	2.5	-3	0.000858874	0.0233312	5.65e-06	3.55e-05	0.00507366	0.00707704	3.56892e-05	4.25529e-05
2	2.5	-3	0.000848178	0.0235795	5.26e-06	3.59e-05	0.00515021	0.00713218	3.60212e-05	4.23874e-05
1.2	2.5	-2	0.00103849	0.0204252	8.56e-06	2.99e-05	0.00449751	0.00633428	2.99897e-05	4.58127e-05
1.3	2.5	-2	0.00100894	0.0208767	8.18e-06	3.08e-05	0.00457348	0.00645483	3.09445e-05	4.52405e-05
1.4	2.5	-2	0.000986556	0.0212631	7.81e-06	3.16e-05	0.00464694	0.00655538	3.17209e-05	4.48153e-05
1.5	2.5	-2	0.000966711	0.0216138	7.43e-06	3.23e-05	0.0047208	0.00664439	3.23883e-05	4.44505e-05
1.6	2.5	-2	0.000946763	0.0219474	7.05e-06	3.29e-05	0.0047972	0.00672711	3.299e-05	4.4091e-05
1.7	2.5	-2	0.000929682	0.0222541	6.66e-06	3.34e-05	0.00487305	0.00680138	3.35115e-05	4.37907e-05
1.8	2.5	-2	0.000913976	0.0225441	6.27e-06	3.38e-05	0.00494948	0.00687011	3.39774e-05	4.35199e-05
1.9	2.5	-2	0.000898993	0.022823	5.88e-06	3.43e-05	0.00502699	0.00693494	3.44018e-05	4.32638e-05
2	2.5	-2	0.000885319	0.0230887	5.49e-06	3.46e-05	0.00510474	0.00699545	3.47824e-05	4.30372e-05
1.2	2.5	-1	0.00108866	0.0196459	8.75e-06	2.78e-05	0.00446064	0.00610156	2.79128e-05	4.6931e-05
1.3	2.5	-1	0.00106122	0.0201426	8.39e-06	2.89e-05	0.00453187	0.0062381	2.90021e-05	4.6341e-05
1.4	2.5	-1	0.00103332	0.0205976	8.01e-06	2.98e-05	0.00460686	0.00636018	2.996e-05	4.57783e-05
1.5	2.5	-1	0.00100917	0.0210013	7.63e-06	3.06e-05	0.00468181	0.00646586	3.07709e-05	4.53061e-05
1.6	2.5	-1	0.000988164	0.0213653	7.25e-06	3.13e-05	0.00475664	0.0065589	3.14665e-05	4.49076e-05
1.7	2.5	-1	0.000969009	0.0217018	6.87e-06	3.19e-05	0.00483212	0.00664295	3.20768e-05	4.45547e-05
1.8	2.5	-1	0.000953111	0.0220095	6.49e-06	3.25e-05	0.00490635	0.00671814	3.26065e-05	4.4265e-05
1.9	2.5	-1	0.000937743	0.0223033	6.11e-06	3.3e-05	0.00498192	0.00678847	3.30862e-05	4.3992e-05
2	2.5	-1	0.000923515	0.0225832	5.73e-06	3.34e-05	0.00505797	0.00685415	3.35196e-05	4.37427e-05
1.2	2.5	0	0.00113934	0.0187423	8.94e-06	2.55e-05	0.00442341	0.00582962	2.556e-05	4.82125e-05
1.3	2.5	0	0.00110987	0.0193371	8.59e-06	2.68e-05	0.00449316	0.00599787	2.68987e-05	4.74959e-05
1.4	2.5	0	0.00107961	0.0198709	8.21e-06	2.8e-05	0.00456718	0.00614536	2.80632e-05	4.68178e-05
1.5	2.5	0	0.00105538	0.0203198	7.85e-06	2.89e-05	0.00463937	0.0062664	2.90042e-05	4.62958e-05
1.6	2.5	0	0.00103134	0.020734	7.47e-06	2.97e-05	0.00471435	0.00637552	2.98362e-05	4.58073e-05
1.7	2.5	0	0.00101388	0.021088	7.11e-06	3.04e-05	0.00478542	0.00646662	3.05144e-05	4.54567e-05
1.8	2.5	0	0.00099275	0.0214438	6.71e-06	3.1e-05	0.00486267	0.00655631	3.11668e-05	4.50539e-05
1.9	2.5	0	0.000977173	0.0217555	6.34e-06	3.16e-05	0.00493605	0.00663315	3.1709e-05	4.47616e-05
2	2.5	0	0.000960422	0.0220626	5.95e-06	3.21e-05	0.00501277	0.00670743	3.22192e-05	4.44542e-05
1.2	2.5	1	0.00119282	0.0176312	9.14e-06	2.27e-05	0.00438412	0.00549269	2.27661e-05	4.97261e-05
1.3	2.5	1	0.00115653	0.0184019	8.77e-06	2.44e-05	0.00445602	0.00571627	2.45084e-05	4.87735e-05
1.4	2.5	1	0.0011266	0.0190288	8.41e-06	2.58e-05	0.0045269	0.00589431	2.59044e-05	4.80113e-05
1.5	2.5	1	0.00109971	0.0195652	8.05e-06	2.7e-05	0.00459866	0.00604335	2.70679e-05	4.73635e-05
1.6	2.5	1	0.00107532	0.0200348	7.68e-06	2.79e-05	0.00467127	0.00617084	2.80516e-05	4.68076e-05
1.7	2.5	1	0.0010518	0.0204625	7.31e-06	2.88e-05	0.00474595	0.00628433	2.89128e-05	4.63011e-05
1.8	2.5	1	0.00103255	0.0208375	6.94e-06	2.95e-05	0.0048188	0.00638163	2.96355e-05	4.58977e-05
1.9	2.5	1	0.00101425	0.0211867	6.56e-06	3.02e-05	0.00489292	0.00647027	3.02783e-05	4.55314e-05
2	2.5	1	0.000997551	0.0215118	6.18e-06	3.07e-05	0.00496731	0.00655113	3.08502e-05	4.52063e-05
1.2	2.5	2	0.00124594	0.0163454	9.34e-06	1.96e-05	0.0043451	0.00510018	1.96934e-05	5.13027e-05
1.3	2.5	2	0.00120367	0.0173053	8.96e-06	2.17e-05	0.0044185	0.0053837	2.18084e-05	5.0173e-05
1.4	2.5	2	0.00116931	0.0180754	8.6e-06	2.34e-05	0.00449029	0.00560716	2.3514e-05	4.92552e-05
1.5	2.5	2	0.00113991	0.0187198	8.24e-06	2.48e-05	0.00456175	0.00579062	2.49281e-05	4.84841e-05
1.6	2.5	2	0.00111263	0.0192851	7.87e-06	2.6e-05	0.00463472	0.00594839	2.61452e-05	4.7797e-05
1.7	2.5	2	0.00109103	0.0197543	7.51e-06	2.7e-05	0.00470512	0.00607644	2.71234e-05	4.72698e-05
1.8	2.5	2	0.00106841	0.0201961	7.14e-06	2.79e-05	0.00477929	0.00619457	2.80151e-05	4.67514e-05
1.9	2.5	2	0.00105162	0.0205672	6.78e-06	2.86e-05	0.00484945	0.00629146	2.8731e-05	4.63761e-05
2	2.5	2	0.00103374	0.0209261	6.41e-06	2.93e-05	0.004923	0.00638342	2.93979e-05	4.59967e-05
1.2	2.5	3	0.00131254	0.0144202	9.58e-06	1.54e-05	0.00429617	0.00458161	1.54524e-05	5.34946e-05
1.3	2.5	3	0.00126308	0.0158805	9.2e-06	1.84e-05	0.00437121	0.00494987	1.85088e-05	5.19243e-05
1.4	2.5	3	0.00122014	0.0169012	8.82e-06	2.06e-05	0.00444672	0.00525205	2.07056e-05	5.07465e-05
1.5	2.5	3	0.00118573	0.0176901	8.45e-06	2.23e-05	0.00451967	0.00548124	2.24144e-05	4.98282e-05
1.6	2.5	3	0.00115359	0.0183846	8.07e-06	2.38e-05	0.00459459	0.00567959	2.39156e-05	4.89836e-05
1.7	2.5	3	0.00113135	0.0189252	7.72e-06	2.5e-05	0.00466315	0.00583092	2.50633e-05	4.8388e-05
1.8	2.5	3	0.00110806	0.0194328	7.36e-06	2.6e-05	0.00473559	0.00597048	2.61195e-05	4.77979e-05
1.9	2.5	3	0.00108776	0.0198792	6.99e-06	2.69e-05	0.0048074	0.00609079	2.70213e-05	4.72976e-05
2	2.5	3	0.00106876	0.0202855	6.63e-06	2.77e-05	0.00488011	0.00619806	2.78137e-05	4.68511e-05
1.4	2.5	4	0.00127473	0.0153949	9.06e-06	1.72e-05	0.00439994	0.00479294	1.73119e-05	5.24878e-05
1.5	2.5	4	0.00123224	0.0165163	8.67e-06	1.96e-05	0.00447695	0.00512625	1.96755e-05	5.1232e-05
1.6	2.5	4	0.00119722	0.0173435	8.29e-06	2.13e-05	0.00455186	0.005367	2.1432e-05	5.0284e-05
1.7	2.5	4	0.00117098	0.0179901	7.93e-06	2.27e-05	0.0046219	0.00555174	2.27989e-05	4.95731e-05
1.8	2.5	4	0.00114635	0.0185708	7.57e-06	2.39e-05	0.00469339	0.00571499	2.4016e-05	4.89167e-05
1.9	2.5	4	0.00112279	0.0191032	7.2e-06	2.5e-05	0.00476666	0.00586221	2.51159e-05	4.83013e-05
2	2.5	4	0.00110272	0.0195673	6.84e-06	2.59e-05	0.00483853	0.00598811	2.60507e-05	4.77865e-05
1.5	2.5	5	0.00128736	0.0147548	8.92e-06	1.58e-05	0.00442633	0.00479855	1.58334e-05	5.31881e-05
1.6	2.5	5	0.00124947	0.0159817	8.55e-06	1.83e-05	0.00450067	0.00495562	1.83509e-05	5.19061e-05
1.7	2.5	5	0.00121459	0.0168949	8.16e-06	2.02e-05	0.00457652	0.00522308	2.02561e-05	5.08919e-05
1.8	2.5	5	0.00118368	0.0176274	7.78e-06	2.17e-05	0.00465225	0.00543337	2.17819e-05	5.0057e-05
1.9	2.5	5	0.00116134	0.018198	7.43e-06	2.29e-05	0.00472181	0.00559411	2.29565e-05	4.94496e-05
2	2.5	5	0.001138	0.0187452	7.06e-06	2.4e-05	0.00479533	0.00574602	2.40728e-05	4.88311e-05
1.7	2.5	6	0.00126177	0.0153945	8.41e-06	1.69e-05	0.0045274	0.00496701	1.6953e-05	5.25579e-05
1.8	2.5	6	0.0012276	0.0164356	8.02e-06	1.9e-05	0.00460386	0.00509443	1.90848e-05	5.14446e-05
1.9	2.5	6	0.00120151	0.0171688	7.66e-06	2.05e-05	0.00467508	0.00528732	2.05874e-05	5.06758e-05
2	2.5	6	0.00117406	0.0178325	7.28e-06	2.19e-05	0.00475117	0.00547554	2.194e-05	4.99323e-05
1.9	2.5	7	0.00124541	0.0157637	7.92e-06	1.74e-05	0.00462401	0.00512802	1.74992e-05	5.22377e-05
2	2.5	7	0.00121438	0.0167024	7.53e-06	1.93e-05	0.00470181	0.00525768	1.94004e-05	5.1233e-05

## Sheet: （14，30.3）
																					whole potentials of the equilibrium droplet		the unit length energy barrier
0	0	0	0.001934	0	1.18e-05	1.18e-05	0.003868	0.003868	0	4.70027e-05		(0,0,0)	-2.953	28.95	-2.304	-0.8032	-18590	42.41	94.09		3.192e-06		5.6e-06
0.2	0	0	0.00177428	0.00355963	1.17e-05	1.18e-05	0.00388058	0.00388897	1.01218e-06	4.5831e-05		(1,0,0)	3.865	-25.16	4.365	4.476	51790	1.151	-51.63
0.4	0	0	0.00167617	0.00499877	1.15e-05	1.19e-05	0.00391744	0.0039504	1.98345e-06	4.48062e-05		(0,1,0)	3.67	1.047	3.472	2.905	284.7	-0.8332	-1.878
0.6	0	0	0.00157805	0.00609251	1.12e-05	1.21e-05	0.00397857	0.00405229	2.9157e-06	4.38138e-05		(0,0,1)	-1.096	1.617	-1.037	-0.949	497	13.84	0.1947
0.75	0	0	0.00153219	0.00625147	1.09e-05	1.22e-05	0.00402749	0.00413382	3.04436e-06	4.26942e-05		(2,0,0)	2.238	-15.32	2.042	2.082	-52400	-14.86	-47.1
0.8	0	0	0.00143484	0.00916912	1.06e-05	1.24e-05	0.0040863	0.00423182	6.48418e-06	4.11647e-05		(1,1,0)	5.83	5.968	5.969	6.023	-387.1	1.757	2.443
0.85	0	0	0.00136354	0.010924	1.04e-05	1.26e-05	0.00413743	0.00431704	9.1247e-06	4.02375e-05		(1,0,1)	1.826	-4.158	1.758	1.584	-1072	-31.09	-0.8327
0.9	0	0	0.00130752	0.0121615	1.01e-05	1.27e-05	0.00418446	0.00439543	1.122e-05	3.96334e-05		(0,2,0)	3.527	1.075	3.337	2.792	-341.8	-0.7521	-1.828
1	0	0	0.00124151	0.0136738	9.76e-06	1.39e-05	0.00426046	0.0045221	1.40047e-05	3.98086e-05		(0,1,1)	0.9528	0.952	0.9527	0.953	-1.646	0.951	0.952
1.1	0	0	0.00118345	0.0148424	9.36e-06	1.62e-05	0.0043392	0.00465334	1.62862e-05	3.99848e-05		(0,0,2)	0.03165	-0.001222	0.03529	0.03694	-3.245	-0.1033	0.005734
1.2	0	0	0.00113626	0.0157909	8.97e-06	1.81e-05	0.00441707	0.00491286	1.81989e-05	4.02478e-05		(3,0,0)	-0.3415	32.83	-0.7639	-0.7205	23040	-9.965	63.66
1.3	0	0	0.00110128	0.0165867	8.6e-06	1.97e-05	0.00449095	0.00514521	1.98375e-05	4.06926e-05		(2,1,0)	2.772	4.805	3.089	3.024	-123.9	13.57	3.305
1.5	0	0	0.00104376	0.0179138	7.84e-06	2.24e-05	0.00464016	0.00552427	2.25844e-05	4.16039e-05		(2,0,1)	-0.8143	3.305	-0.8152	-0.7267	760.9	22.82	1.005
1.7	0	0	0.000997867	0.0190164	7.08e-06	2.47e-05	0.00479138	0.00583004	2.48394e-05	4.24874e-05		(1,2,0)	1.706	0.8901	1.741	1.72	-125.5	-1.786	0.3834
1.2	0	-5	0.000886622	0.0222479	8.03e-06	3.48e-05	0.00460237	0.00687099	3.50483e-05	4.31326e-05		(1,1,1)	3.753	3.445	4.129	4.08	-122.6	3.194	1.374
1.3	0	-5	0.000864314	0.0225758	7.63e-06	3.54e-05	0.0046815	0.00695071	3.56304e-05	4.27677e-05		(1,0,2)	-0.0439	-0.0008301	-0.04949	-0.05266	4.555	0.1439	-0.009084
1.4	0	-5	0.00084712	0.0228765	7.24e-06	3.59e-05	0.00475897	0.00702219	3.61336e-05	4.24959e-05		(0,3,0)	2.814	0.9242	2.665	2.23	282.3	-0.6829	-1.611
1.5	0	-5	0.000828494	0.0231693	6.83e-06	3.64e-05	0.00483989	0.00709005	3.65892e-05	4.2208e-05		(0,2,1)	0.7628	0.7615	0.7623	0.7642	-12.23	0.7534	0.7597
1.6	0	-5	0.000813203	0.023446	6.43e-06	3.68e-05	0.00491982	0.00715295	3.69964e-05	4.1979e-05		(0,1,2)	0.7775	0.774	0.779	0.7788	0.7748	0.7643	0.7687
1.7	0	-5	0.000799348	0.0237108	6.02e-06	3.71e-05	0.00500013	0.00721194	3.73613e-05	4.17806e-05		(0,0,3)	-0.0001925	-1.229e-05	-0.0002204	-0.0002296	0.009131	0.0003669	-2.31e-05
1.8	0	-5	0.000787501	0.0239645	5.61e-06	3.75e-05	0.00507991	0.00726748	3.76914e-05	4.16179e-05		(4,0,0)	0.09636	-10.65	-0.3371	-0.4886	-3731	5.953	-16.57
1.9	0	-5	0.000771897	0.024224	5.18e-06	3.78e-05	0.00516558	0.00732299	3.80024e-05	4.13971e-05		(3,1,0)	0.2301	-19.96	0.01655	-0.1488	-1292	-68.51	-15.52
2	0	-5	0.000761185	0.0244657	4.77e-06	3.81e-05	0.00524713	0.00737406	3.8279e-05	4.12593e-05		(3,0,1)	0.04903	-0.8545	0.05946	0.04745	-177.2	-5.408	-0.3684
1.2	0	-4	0.000937715	0.0216384	8.22e-06	3.32e-05	0.00456444	0.00669273	3.3359e-05	4.40787e-05		(2,2,0)	-1.031	13.98	-0.7637	-0.5429	1016	48.68	11.3
1.3	0	-4	0.000914593	0.021994	7.84e-06	3.38e-05	0.00464107	0.00678226	3.40388e-05	4.36713e-05		(2,1,1)	0.1351	-0.157	0.1341	0.1455	-19.19	-0.7335	-0.1418
1.4	0	-4	0.000893422	0.0223238	7.44e-06	3.44e-05	0.00471887	0.00686315	3.46305e-05	4.33054e-05		(2,0,2)	0.0149	0.002572	0.01707	0.01863	-1.542	-0.04761	0.00366
1.5	0	-4	0.000877872	0.0226203	7.06e-06	3.49e-05	0.00479408	0.00693417	3.5131e-05	4.30469e-05		(1,3,0)	-0.3936	-4.105	-0.5367	-0.6052	-210.6	-12.43	-3.222
1.6	0	-4	0.000860334	0.0229122	6.66e-06	3.54e-05	0.00487318	0.00700249	3.5593e-05	4.27593e-05		(1,2,1)	-0.8231	-0.6111	-0.8963	-0.8915	34.38	-0.2716	-0.2006
1.7	0	-4	0.000846362	0.0231847	6.27e-06	3.58e-05	0.00495069	0.00706502	3.60006e-05	4.2537e-05		(1,1,2)	0.001568	-0.0003421	0.001635	0.001727	-0.1068	-0.002996	-0.0004193
1.8	0	-4	0.000831664	0.0234522	5.86e-06	3.62e-05	0.00503074	0.00712514	3.63758e-05	4.2308e-05		(1,0,3)	0.0001394	1.31e-05	0.0001589	0.0001671	-0.006409	-0.0002475	1.779e-05
1.9	0	-4	0.000820606	0.0237037	5.47e-06	3.65e-05	0.00510834	0.00718083	3.67125e-05	4.21421e-05		(0,4,0)	-0.7523	0.06466	-0.698	-0.5776	-23.98	1.213	0.6669
2	0	-4	0.000808742	0.0239534	5.07e-06	3.68e-05	0.00518829	0.00723514	3.70273e-05	4.19658e-05		(0,3,1)	-0.1811	-0.1999	-0.1815	-0.1814	1.256	-0.2341	-0.1996
1.2	0	-3	0.000985537	0.0209953	8.4e-06	3.14e-05	0.00452895	0.00650293	3.15875e-05	4.50295e-05		(0,2,2)	-0.1559	-0.1547	-0.1562	-0.1562	-0.1284	-0.1521	-0.1536
1.3	0	-3	0.000961614	0.0213889	8.03e-06	3.22e-05	0.00460326	0.00660547	3.23895e-05	4.45796e-05		(0,1,3)	4.703e-06	1.389e-07	4.938e-06	5.078e-06	-0.0001707	-3.986e-06	-7.381e-07
1.4	0	-3	0.000939164	0.0217504	7.64e-06	3.29e-05	0.00467926	0.00669716	3.30845e-05	4.41687e-05		(0,0,4)	3.352e-07	2.037e-08	3.954e-07	4.079e-07	-9.904e-06	-5.574e-07	3.012e-08
1.5	0	-3	0.000919494	0.0220805	7.26e-06	3.35e-05	0.00475546	0.00677877	3.36818e-05	4.38189e-05
1.6	0	-3	0.000902167	0.0223873	6.87e-06	3.4e-05	0.00483177	0.00685286	3.4205e-05	4.35162e-05
1.7	0	-3	0.000888008	0.022671	6.49e-06	3.45e-05	0.0049069	0.00691992	3.46619e-05	4.32742e-05
1.8	0	-3	0.000873098	0.0229482	6.1e-06	3.49e-05	0.00498461	0.00698403	3.50819e-05	4.30254e-05
1.9	0	-3	0.000861404	0.0232071	5.71e-06	3.52e-05	0.00506039	0.00704289	3.54546e-05	4.28344e-05
2	0	-3	0.000848859	0.0234637	5.32e-06	3.56e-05	0.00513867	0.00710018	3.58035e-05	4.26318e-05
1.2	0	-2	0.00103739	0.020278	8.6e-06	2.95e-05	0.00449046	0.00629038	2.96519e-05	4.61102e-05
1.3	0	-2	0.00101024	0.0207289	8.23e-06	3.04e-05	0.00456416	0.0064115	3.06151e-05	4.55673e-05
1.4	0	-2	0.000986649	0.0211294	7.85e-06	3.12e-05	0.00463814	0.00651641	3.14304e-05	4.51094e-05
1.5	0	-2	0.000965469	0.021493	7.47e-06	3.19e-05	0.0047128	0.00660929	3.21322e-05	4.47113e-05
1.6	0	-2	0.000946218	0.021829	7.09e-06	3.26e-05	0.00478818	0.00669313	3.27471e-05	4.43569e-05
1.7	0	-2	0.000927613	0.0221475	6.7e-06	3.31e-05	0.00486525	0.00677082	3.32986e-05	4.40205e-05
1.8	0	-2	0.000912461	0.0224385	6.32e-06	3.36e-05	0.00494078	0.00684017	3.37731e-05	4.37546e-05
1.9	0	-2	0.00089799	0.022718	5.93e-06	3.4e-05	0.00501739	0.00690549	3.42051e-05	4.35033e-05
2	0	-2	0.000884787	0.0229849	5.54e-06	3.44e-05	0.00509422	0.0069667	3.45955e-05	4.32779e-05
1.2	0	-1	0.00108805	0.0194861	8.79e-06	2.74e-05	0.00445285	0.0060538	2.75503e-05	4.72711e-05
1.3	0	-1	0.00105608	0.0200239	8.41e-06	2.86e-05	0.0045273	0.00620248	2.874e-05	4.65741e-05
1.4	0	-1	0.00103172	0.0204692	8.05e-06	2.95e-05	0.00459911	0.00632246	2.96838e-05	4.60628e-05
1.5	0	-1	0.00100832	0.0208775	7.67e-06	3.03e-05	0.00467304	0.00642994	3.05129e-05	4.55911e-05
1.6	0	-1	0.000988129	0.0212437	7.3e-06	3.1e-05	0.0047467	0.00652407	3.12209e-05	4.51986e-05
1.7	0	-1	0.000969569	0.0215835	6.92e-06	3.17e-05	0.00482113	0.00660949	3.18467e-05	4.48457e-05
1.8	0	-1	0.000950126	0.0219123	6.53e-06	3.22e-05	0.00489885	0.00669037	3.2422e-05	4.4487e-05
1.9	0	-1	0.000935211	0.0222078	6.15e-06	3.27e-05	0.00497365	0.00676149	3.29115e-05	4.42152e-05
2	0	-1	0.000919333	0.0224982	5.76e-06	3.32e-05	0.00505148	0.00683002	3.3368e-05	4.39322e-05
1.2	0	1	0.00118721	0.0174664	9.16e-06	2.23e-05	0.00437925	0.00544243	2.24051e-05	5.00272e-05
1.3	0	1	0.00115177	0.0182497	8.8e-06	2.4e-05	0.00445036	0.00567026	2.41751e-05	4.90749e-05
1.4	0	1	0.00111757	0.0189306	8.43e-06	2.55e-05	0.00452477	0.00586442	2.5698e-05	4.82002e-05
1.5	0	1	0.00109126	0.0194741	8.06e-06	2.67e-05	0.00459609	0.0060158	2.68809e-05	4.75489e-05
1.6	0	1	0.0010674	0.0199492	7.7e-06	2.77e-05	0.00466824	0.0061452	2.78814e-05	4.69893e-05
1.7	0	1	0.00104697	0.0203636	7.34e-06	2.85e-05	0.00473975	0.00625547	2.87197e-05	4.65321e-05
1.8	0	1	0.00102557	0.0207588	6.96e-06	2.93e-05	0.00481485	0.00635847	2.9489e-05	4.60772e-05
1.9	0	1	0.00100766	0.0211106	6.58e-06	3e-05	0.0048885	0.00644811	3.01422e-05	4.57089e-05
2	0	1	0.000993982	0.0214217	6.23e-06	3.05e-05	0.00495913	0.00652571	3.06929e-05	4.54318e-05
1.2	0	2	0.00124261	0.0161276	9.37e-06	1.91e-05	0.00433813	0.00503362	1.92322e-05	5.16778e-05
1.3	0	2	0.00120127	0.0171084	9e-06	2.13e-05	0.00441055	0.00532415	2.13853e-05	5.05467e-05
1.4	0	2	0.00116517	0.0179166	8.63e-06	2.3e-05	0.00448355	0.00555938	2.31741e-05	4.95743e-05
1.5	0	2	0.00113158	0.0186165	8.25e-06	2.46e-05	0.00455868	0.00575936	2.47152e-05	4.8695e-05
1.6	0	2	0.00110973	0.0191455	7.91e-06	2.57e-05	0.00462634	0.00590728	2.58544e-05	4.81122e-05
1.7	0	2	0.00108616	0.0196433	7.55e-06	2.67e-05	0.00469854	0.00604384	2.69012e-05	4.75267e-05
1.8	0	2	0.00106402	0.020091	7.17e-06	2.76e-05	0.00477204	0.00616404	2.78117e-05	4.7004e-05
1.9	0	2	0.00104509	0.0204849	6.81e-06	2.84e-05	0.00484451	0.00626749	2.85809e-05	4.65737e-05
2	0	2	0.00102757	0.0208468	6.44e-06	2.91e-05	0.00491758	0.00636054	2.92588e-05	4.61921e-05
1.2	0	3	0.00130861	0.0140705	9.62e-06	1.47e-05	0.00428914	0.0045699	1.47585e-05	5.39728e-05
1.3	0	3	0.00125483	0.0157139	9.22e-06	1.81e-05	0.00436748	0.00489869	1.81699e-05	5.21971e-05
1.4	0	3	0.00121269	0.0167606	8.84e-06	2.03e-05	0.0044424	0.00520926	2.04176e-05	5.10058e-05
1.5	0	3	0.00117893	0.0175589	8.48e-06	2.2e-05	0.00451475	0.00544163	2.21448e-05	5.00885e-05
1.6	0	3	0.00114574	0.0182775	8.09e-06	2.36e-05	0.00459071	0.00564735	2.36996e-05	4.92075e-05
1.7	0	3	0.00112393	0.0188234	7.75e-06	2.47e-05	0.00465882	0.00580052	2.4861e-05	4.86104e-05
1.8	0	3	0.00110108	0.0193359	7.38e-06	2.58e-05	0.00473077	0.00594184	2.59314e-05	4.80193e-05
1.9	0	3	0.00108117	0.0197871	7.02e-06	2.67e-05	0.0048021	0.0060638	2.68474e-05	4.75163e-05
2	0	3	0.0010601	0.0202181	6.64e-06	2.75e-05	0.00487734	0.00617812	2.76964e-05	4.70142e-05
1.4	0	4	0.0012669	0.015198	9.08e-06	1.68e-05	0.00439545	0.00474708	1.69181e-05	5.27973e-05
1.5	0	4	0.00122516	0.0163637	8.69e-06	1.93e-05	0.00447185	0.0050799	1.93681e-05	5.15094e-05
1.6	0	4	0.00119076	0.0172074	8.32e-06	2.1e-05	0.00454616	0.00532608	2.11586e-05	5.05546e-05
1.7	0	4	0.00116232	0.0178915	7.95e-06	2.25e-05	0.00461845	0.00552208	2.26074e-05	4.97805e-05
1.8	0	4	0.00113921	0.0184639	7.6e-06	2.37e-05	0.00468832	0.00568321	2.3807e-05	4.91517e-05
1.9	0	4	0.00111606	0.0190008	7.23e-06	2.48e-05	0.0047611	0.00583202	2.49188e-05	4.8536e-05
2	0	4	0.00109636	0.0194695	6.87e-06	2.57e-05	0.00483248	0.00595955	2.58671e-05	4.8018e-05
1.6	0	5	0.00124256	0.0158	8.58e-06	1.79e-05	0.00449489	0.00491281	1.79889e-05	5.22147e-05
1.7	0	5	0.00120827	0.0167455	8.2e-06	1.98e-05	0.00457012	0.00517819	1.99597e-05	5.1178e-05
1.8	0	5	0.0011779	0.0174925	7.82e-06	2.14e-05	0.00464525	0.00539326	2.15168e-05	5.03358e-05
1.9	0	5	0.00115066	0.0181308	7.43e-06	2.27e-05	0.00472044	0.00557373	2.28375e-05	4.96044e-05
2	0	5	0.00113142	0.0186382	7.09e-06	2.37e-05	0.0047891	0.00571457	2.38698e-05	4.9074e-05
1.7	0	6	0.00125503	0.015175	8.44e-06	1.64e-05	0.00452096	0.00495626	1.65232e-05	5.29033e-05
1.8	0	6	0.00122141	0.0162612	8.06e-06	1.86e-05	0.0045968	0.00508267	1.87407e-05	5.17583e-05
1.9	0	6	0.00119063	0.0170923	7.67e-06	2.03e-05	0.00467346	0.00526409	2.04504e-05	5.08418e-05
2	0	6	0.00116876	0.0176968	7.32e-06	2.15e-05	0.00474291	0.00543558	2.16789e-05	5.02178e-05
1.9	0	7	0.00123922	0.0155483	7.96e-06	1.7e-05	0.00461636	0.00511527	1.70793e-05	5.25879e-05
2	0	7	0.00120866	0.0165278	7.57e-06	1.89e-05	0.00469355	0.00524391	1.906e-05	5.15521e-05
1.2	0.5	-5	0.000876157	0.022357	7.99e-06	3.51e-05	0.00461014	0.00690258	3.53484e-05	4.29501e-05
1.3	0.5	-5	0.000855651	0.0226774	7.6e-06	3.57e-05	0.00468847	0.00698011	3.59117e-05	4.26199e-05
1.4	0.5	-5	0.000837834	0.0229777	7.2e-06	3.62e-05	0.00476701	0.00705108	3.64072e-05	4.2342e-05
1.5	0.5	-5	0.000821245	0.0232633	6.8e-06	3.66e-05	0.00484662	0.00711697	3.68471e-05	4.20934e-05
1.6	0.5	-5	0.000805448	0.0235394	6.39e-06	3.7e-05	0.00492749	0.00717937	3.72465e-05	4.18613e-05
1.7	0.5	-5	0.000791132	0.0238045	5.97e-06	3.74e-05	0.00500877	0.00723809	3.7606e-05	4.16588e-05
1.8	0.5	-5	0.000777488	0.0240615	5.56e-06	3.77e-05	0.00509106	0.00729386	3.79309e-05	4.14712e-05
1.9	0.5	-5	0.000763959	0.0243138	5.13e-06	3.8e-05	0.00517491	0.00734762	3.82293e-05	4.1289e-05
2	0.5	-5	0.000752895	0.024556	4.72e-06	3.83e-05	0.00525738	0.00739851	3.85012e-05	4.11477e-05
1.2	0.5	-4	0.000930216	0.0217296	8.2e-06	3.34e-05	0.00457001	0.00671946	3.36103e-05	4.39365e-05
1.3	0.5	-4	0.000906515	0.0220832	7.8e-06	3.41e-05	0.00464757	0.00680805	3.42797e-05	4.35212e-05
1.4	0.5	-4	0.000887227	0.0224034	7.42e-06	3.46e-05	0.00472424	0.00688621	3.48481e-05	4.31927e-05
1.5	0.5	-4	0.00087127	0.0226992	7.03e-06	3.51e-05	0.00480021	0.00695673	3.53421e-05	4.29301e-05
1.6	0.5	-4	0.000855789	0.0229837	6.64e-06	3.56e-05	0.00487767	0.00702313	3.57899e-05	4.26786e-05
1.7	0.5	-4	0.000839009	0.023263	6.23e-06	3.6e-05	0.00495842	0.00708681	3.62e-05	4.24132e-05
1.8	0.5	-4	0.000826475	0.0235236	5.83e-06	3.63e-05	0.00503652	0.00714528	3.65644e-05	4.22216e-05
1.9	0.5	-4	0.000812618	0.023783	5.42e-06	3.67e-05	0.00511772	0.00720234	3.69044e-05	4.20118e-05
2	0.5	-4	0.00080047	0.0240325	5.01e-06	3.7e-05	0.00519853	0.00725634	3.72135e-05	4.18346e-05
1.2	0.5	-3	0.00098122	0.021071	8.39e-06	3.16e-05	0.00453215	0.00652556	3.17992e-05	4.49374e-05
1.3	0.5	-3	0.000956877	0.0214617	8.01e-06	3.24e-05	0.00460707	0.00662696	3.25902e-05	4.4484e-05
1.4	0.5	-3	0.000934044	0.0218208	7.62e-06	3.31e-05	0.0046837	0.00671769	3.32755e-05	4.40695e-05
1.5	0.5	-3	0.000914026	0.0221496	7.23e-06	3.37e-05	0.00476053	0.00679866	3.38655e-05	4.37154e-05
1.6	0.5	-3	0.00089867	0.0224472	6.85e-06	3.42e-05	0.00483524	0.00687028	3.43693e-05	4.34487e-05
1.7	0.5	-3	0.000881967	0.0227388	6.46e-06	3.46e-05	0.00491325	0.00693893	3.48344e-05	4.31634e-05
1.8	0.5	-3	0.000869112	0.0230075	6.07e-06	3.5e-05	0.00498905	0.00700092	3.5239e-05	4.29514e-05
1.9	0.5	-3	0.000854868	0.0232738	5.67e-06	3.54e-05	0.00506807	0.00706111	3.56158e-05	4.27204e-05
2	0.5	-3	0.0008421	0.0235303	5.27e-06	3.57e-05	0.00514703	0.00711814	3.59604e-05	4.25164e-05
1.2	0.5	-2	0.00103291	0.0203524	8.58e-06	2.97e-05	0.00449378	0.00631262	2.98536e-05	4.60116e-05
1.3	0.5	-2	0.00100471	0.020804	8.2e-06	3.06e-05	0.00456861	0.0064336	3.08151e-05	4.54518e-05
1.4	0.5	-2	0.000980789	0.0212014	7.83e-06	3.14e-05	0.00464322	0.00653731	3.16189e-05	4.49935e-05
1.5	0.5	-2	0.000959303	0.0215637	7.44e-06	3.21e-05	0.00471853	0.00662957	3.23144e-05	4.459e-05
1.6	0.5	-2	0.000939777	0.0218977	7.06e-06	3.27e-05	0.00479455	0.00671256	3.29201e-05	4.42345e-05
1.7	0.5	-2	0.000923066	0.0222057	6.68e-06	3.32e-05	0.00487003	0.00678738	3.34485e-05	4.39343e-05
1.8	0.5	-2	0.000907704	0.0224962	6.29e-06	3.37e-05	0.00494608	0.00685641	3.39189e-05	4.36653e-05
1.9	0.5	-2	0.000895232	0.0227664	5.91e-06	3.41e-05	0.00502063	0.00691938	3.43337e-05	4.34501e-05
2	0.5	-2	0.000879662	0.0230421	5.51e-06	3.45e-05	0.00510056	0.00698239	3.47336e-05	4.3184e-05
1.2	0.5	-1	0.00108304	0.019567	8.77e-06	2.76e-05	0.00445658	0.00607805	2.77628e-05	4.7151e-05
1.3	0.5	-1	0.00105345	0.0200838	8.4e-06	2.87e-05	0.00452941	0.0062205	2.89022e-05	4.65073e-05
1.4	0.5	-1	0.00102608	0.0205415	8.02e-06	2.97e-05	0.00460399	0.00634356	2.98701e-05	4.59438e-05
1.5	0.5	-1	0.00100522	0.0209324	7.66e-06	3.05e-05	0.00467593	0.00644614	3.06595e-05	4.5524e-05
1.6	0.5	-1	0.000981315	0.0213148	7.27e-06	3.12e-05	0.00475344	0.0065442	3.13964e-05	4.50657e-05
1.7	0.5	-1	0.000962531	0.0216531	6.89e-06	3.18e-05	0.00482853	0.00662895	3.20149e-05	4.47111e-05
1.8	0.5	-1	0.000946954	0.0219612	6.51e-06	3.24e-05	0.00490238	0.0067044	3.25486e-05	4.44237e-05
1.9	0.5	-1	0.000929826	0.0222655	6.12e-06	3.29e-05	0.00497998	0.00677745	3.30499e-05	4.41143e-05
2	0.5	-1	0.00091586	0.0225458	5.74e-06	3.33e-05	0.00505578	0.00684336	3.34867e-05	4.38661e-05
1.2	0.5	0	0.00113346	0.0186505	8.96e-06	2.52e-05	0.00441915	0.00580204	2.53784e-05	4.84556e-05
1.3	0.5	0	0.00109939	0.0192907	8.59e-06	2.67e-05	0.00449247	0.00598364	2.6826e-05	4.76271e-05
1.4	0.5	0	0.00107226	0.0198104	8.23e-06	2.78e-05	0.00456401	0.00612743	2.79627e-05	4.69991e-05
1.5	0.5	0	0.00104848	0.0202622	7.86e-06	2.87e-05	0.00463579	0.00624953	2.89143e-05	4.64759e-05
1.6	0.5	0	0.00102487	0.0206794	7.49e-06	2.96e-05	0.00471034	0.00635972	2.97575e-05	4.59835e-05
1.7	0.5	0	0.00100502	0.0210494	7.11e-06	3.03e-05	0.00478386	0.00645516	3.04708e-05	4.55849e-05
1.8	0.5	0	0.000986987	0.0213916	6.74e-06	3.09e-05	0.00485781	0.00654158	3.11012e-05	4.52309e-05
1.9	0.5	0	0.000969257	0.0217172	6.36e-06	3.15e-05	0.00493363	0.00662208	3.16725e-05	4.48946e-05
2	0.5	0	0.000954761	0.0220147	5.98e-06	3.2e-05	0.00500765	0.00669417	3.21694e-05	4.46222e-05
1.2	0.5	1	0.00118168	0.0175742	9.14e-06	2.25e-05	0.00438336	0.00547512	2.26672e-05	4.98736e-05
1.3	0.5	1	0.00114595	0.0183496	8.78e-06	2.43e-05	0.00445504	0.00570022	2.44216e-05	4.89192e-05
1.4	0.5	1	0.00111649	0.0189802	8.42e-06	2.57e-05	0.0045257	0.00587954	2.58286e-05	4.81559e-05
1.5	0.5	1	0.00109003	0.0195202	8.06e-06	2.68e-05	0.00459723	0.00602976	2.70033e-05	4.75053e-05
1.6	0.5	1	0.00106602	0.0199923	7.69e-06	2.78e-05	0.00466961	0.00615814	2.79958e-05	4.69478e-05
1.7	0.5	1	0.00104546	0.0204053	7.33e-06	2.87e-05	0.00474133	0.0062679	2.88301e-05	4.64891e-05
1.8	0.5	1	0.00102394	0.0207985	6.95e-06	2.94e-05	0.00481667	0.0063702	2.95934e-05	4.60355e-05
1.9	0.5	1	0.00100592	0.021149	6.57e-06	3.01e-05	0.00489054	0.00645935	3.02423e-05	4.56676e-05
2	0.5	1	0.000989492	0.0214752	6.2e-06	3.06e-05	0.00496469	0.00654065	3.08194e-05	4.5341e-05
1.2	0.5	2	0.00124081	0.016203	9.36e-06	1.93e-05	0.00433947	0.00505688	1.94082e-05	5.16098e-05
1.3	0.5	2	0.00119371	0.0172382	8.97e-06	2.16e-05	0.00441663	0.00536324	2.16895e-05	5.03481e-05
1.4	0.5	2	0.00115903	0.0180212	8.61e-06	2.33e-05	0.00448887	0.00559066	2.34252e-05	4.94105e-05
1.5	0.5	2	0.00113006	0.0186688	8.25e-06	2.47e-05	0.00456009	0.00577522	2.48486e-05	4.8639e-05
1.6	0.5	2	0.00110319	0.0192374	7.88e-06	2.59e-05	0.00463282	0.00593413	2.60759e-05	4.79502e-05
1.7	0.5	2	0.0010844	0.0196892	7.54e-06	2.69e-05	0.00470038	0.00605752	2.7019e-05	4.74739e-05
1.8	0.5	2	0.00106215	0.0201344	7.16e-06	2.78e-05	0.00477412	0.00617686	2.79226e-05	4.69524e-05
1.9	0.5	2	0.00104312	0.0205264	6.79e-06	2.85e-05	0.00484683	0.00627961	2.86861e-05	4.6523e-05
2	0.5	2	0.0010255	0.0208868	6.42e-06	2.92e-05	0.00492013	0.00637212	2.93592e-05	4.6142e-05
1.2	0.5	3	0.0013014	0.0143055	9.59e-06	1.52e-05	0.00429449	0.00457882	1.52421e-05	5.3707e-05
1.3	0.5	3	0.00125264	0.0157985	9.21e-06	1.83e-05	0.00436924	0.0049247	1.83606e-05	5.21131e-05
1.4	0.5	3	0.00121032	0.0168314	8.83e-06	2.05e-05	0.00444445	0.00523083	2.05835e-05	5.09289e-05
1.5	0.5	3	0.0011764	0.0176248	8.46e-06	2.22e-05	0.00451709	0.00546156	2.23029e-05	5.001e-05
1.6	0.5	3	0.0011439	0.0183316	8.08e-06	2.37e-05	0.00459253	0.00566366	2.3833e-05	4.91453e-05
1.7	0.5	3	0.00112198	0.0188745	7.74e-06	2.48e-05	0.00466086	0.00581582	2.4988e-05	4.85498e-05
1.8	0.5	3	0.00109903	0.0193847	7.37e-06	2.59e-05	0.00473305	0.00595631	2.60529e-05	4.79579e-05
1.9	0.5	3	0.00107903	0.0198334	7.01e-06	2.68e-05	0.00480462	0.0060774	2.69624e-05	4.7456e-05
2	0.5	3	0.00105786	0.020262	6.63e-06	2.76e-05	0.0048801	0.00619088	2.78045e-05	4.69556e-05
1.4	0.5	4	0.00126443	0.0152978	9.07e-06	1.7e-05	0.00439759	0.00476317	1.71349e-05	5.26962e-05
1.5	0.5	4	0.00122252	0.0164408	8.68e-06	1.94e-05	0.0044743	0.00510333	1.95432e-05	5.14234e-05
1.6	0.5	4	0.00118799	0.0172759	8.3e-06	2.12e-05	0.0045489	0.0053467	2.13178e-05	5.04711e-05
1.7	0.5	4	0.00116213	0.0179259	7.95e-06	2.26e-05	0.00461865	0.00553265	2.26936e-05	4.97586e-05
1.8	0.5	4	0.00113704	0.0185174	7.58e-06	2.38e-05	0.00469074	0.00569914	2.39358e-05	4.90857e-05
1.9	0.5	4	0.0011138	0.0190524	7.22e-06	2.49e-05	0.00476376	0.00584727	2.50438e-05	4.84683e-05
2	0.5	4	0.00109402	0.0195187	6.85e-06	2.58e-05	0.00483538	0.00597394	2.5986e-05	4.79513e-05
1.5	0.5	5	0.00127712	0.0146369	8.94e-06	1.55e-05	0.00442364	0.00479407	1.56193e-05	5.34166e-05
1.6	0.5	5	0.00123974	0.0158921	8.56e-06	1.81e-05	0.00449768	0.00492843	1.81908e-05	5.21129e-05
1.7	0.5	5	0.00120533	0.0168209	8.18e-06	2e-05	0.00457322	0.00520088	2.01299e-05	5.10869e-05
1.8	0.5	5	0.00117485	0.0175603	7.8e-06	2.15e-05	0.00464864	0.00541346	2.16722e-05	5.02477e-05
1.9	0.5	5	0.00114751	0.0181954	7.42e-06	2.28e-05	0.00472413	0.00559281	2.2987e-05	4.95153e-05
2	0.5	5	0.001129	0.0186922	7.07e-06	2.39e-05	0.0047921	0.00573047	2.39968e-05	4.90019e-05
1.7	0.5	6	0.00125205	0.0152865	8.43e-06	1.67e-05	0.00452409	0.00496148	1.67585e-05	5.27823e-05
1.8	0.5	6	0.00121832	0.0163496	8.04e-06	1.88e-05	0.00460024	0.00508839	1.89343e-05	5.1653e-05
1.9	0.5	6	0.00118746	0.0171667	7.65e-06	2.05e-05	0.00467719	0.00528622	2.06163e-05	5.07468e-05
2	0.5	6	0.0011655	0.0177651	7.3e-06	2.17e-05	0.00474694	0.00545573	2.18326e-05	5.01258e-05
1.9	0.5	7	0.00123604	0.0156577	7.94e-06	1.72e-05	0.0046201	0.00512149	1.73099e-05	5.24643e-05
2	0.5	7	0.0012054	0.0166162	7.55e-06	1.91e-05	0.00469758	0.00525064	1.92519e-05	5.1444e-05
1.2	1	-5	0.000868952	0.0224343	7.97e-06	3.54e-05	0.00461548	0.00692497	3.55622e-05	4.28255e-05
1.3	1	-5	0.000847896	0.0227538	7.56e-06	3.59e-05	0.00469471	0.00700192	3.61177e-05	4.24904e-05
1.4	1	-5	0.000832263	0.023047	7.17e-06	3.64e-05	0.00477184	0.00707103	3.65989e-05	4.2253e-05
1.5	1	-5	0.000815256	0.0233326	6.77e-06	3.68e-05	0.00485218	0.00713666	3.70343e-05	4.20001e-05
1.6	1	-5	0.000799077	0.0236089	6.35e-06	3.72e-05	0.0049338	0.00719885	3.74295e-05	4.17643e-05
1.7	1	-5	0.000784411	0.0238733	5.94e-06	3.76e-05	0.00501584	0.00725711	3.77819e-05	4.15605e-05
1.8	1	-5	0.000770896	0.0241295	5.52e-06	3.79e-05	0.0050984	0.00731251	3.81023e-05	4.13773e-05
1.9	1	-5	0.000757056	0.024381	5.09e-06	3.82e-05	0.00518302	0.00736574	3.83927e-05	4.11944e-05
2	1	-5	0.000745721	0.0246225	4.67e-06	3.84e-05	0.00526626	0.00741616	3.86572e-05	4.10531e-05
1.2	1	-4	0.000924062	0.0217964	8.17e-06	3.36e-05	0.00457458	0.0067389	3.37921e-05	4.38218e-05
1.3	1	-4	0.000902318	0.0221408	7.79e-06	3.42e-05	0.00465095	0.00682492	3.444e-05	4.3443e-05
1.4	1	-4	0.000882696	0.0224604	7.4e-06	3.48e-05	0.00472816	0.00690269	3.50037e-05	4.311e-05
1.5	1	-4	0.000866443	0.0227558	7.01e-06	3.53e-05	0.00480468	0.00697287	3.54931e-05	4.28442e-05
1.6	1	-4	0.000850688	0.0230392	6.61e-06	3.57e-05	0.00488272	0.00703873	3.5934e-05	4.25927e-05
1.7	1	-4	0.000836144	0.0233115	6.21e-06	3.61e-05	0.00496144	0.00710077	3.63338e-05	4.23655e-05
1.8	1	-4	0.000820867	0.0235791	5.8e-06	3.65e-05	0.00504277	0.00716047	3.67012e-05	4.21314e-05
1.9	1	-4	0.000809338	0.0238311	5.4e-06	3.68e-05	0.00512158	0.00721587	3.70316e-05	4.19619e-05
2	1	-4	0.000797002	0.0240817	4.99e-06	3.71e-05	0.00520282	0.00727005	3.73413e-05	4.17808e-05
1.2	1	-3	0.000974308	0.0211396	8.36e-06	3.18e-05	0.00453728	0.00654547	3.19797e-05	4.48039e-05
1.3	1	-3	0.000951807	0.0215193	7.99e-06	3.25e-05	0.00461115	0.00664368	3.27437e-05	4.43861e-05
1.4	1	-3	0.000930912	0.0218688	7.61e-06	3.32e-05	0.00468641	0.00673174	3.34072e-05	4.4007e-05
1.5	1	-3	0.000910651	0.0221962	7.22e-06	3.38e-05	0.00476367	0.00681215	3.39911e-05	4.3651e-05
1.6	1	-3	0.000895095	0.0224931	6.84e-06	3.43e-05	0.00483877	0.0068834	3.44906e-05	4.33824e-05
1.7	1	-3	0.000878191	0.022784	6.44e-06	3.47e-05	0.00491722	0.00695168	3.49511e-05	4.30957e-05
1.8	1	-3	0.000865164	0.0230521	6.05e-06	3.51e-05	0.00499344	0.00701334	3.53513e-05	4.28833e-05
1.9	1	-3	0.000850749	0.0233189	5.65e-06	3.55e-05	0.00507291	0.00707353	3.5727e-05	4.26491e-05
2	1	-3	0.000840203	0.0235678	5.26e-06	3.58e-05	0.00514937	0.00712884	3.60617e-05	4.24822e-05
1.2	1	-2	0.00102919	0.0204074	8.57e-06	2.98e-05	0.00449655	0.00632898	3.00015e-05	4.59309e-05
1.3	1	-2	0.00100123	0.0208537	8.19e-06	3.08e-05	0.00457141	0.00644826	3.09484e-05	4.53806e-05
1.4	1	-2	0.000977079	0.0212501	7.81e-06	3.16e-05	0.00464643	0.0065515	3.17478e-05	4.49182e-05
1.5	1	-2	0.00095538	0.0216103	7.43e-06	3.22e-05	0.00472217	0.00664297	3.24354e-05	4.4515e-05
1.6	1	-2	0.000937804	0.0219349	7.05e-06	3.28e-05	0.0047965	0.00672345	3.30216e-05	4.4194e-05
1.7	1	-2	0.000920946	0.0222421	6.67e-06	3.33e-05	0.00487226	0.00679791	3.35462e-05	4.38926e-05
1.8	1	-2	0.000905447	0.0225327	6.28e-06	3.38e-05	0.00494859	0.00686686	3.40154e-05	4.36203e-05
1.9	1	-2	0.000890657	0.0228107	5.89e-06	3.42e-05	0.00502601	0.00693145	3.44384e-05	4.33672e-05
2	1	-2	0.000879381	0.0230683	5.51e-06	3.46e-05	0.00510091	0.00699024	3.48107e-05	4.31771e-05
1.2	1	-1	0.00108166	0.0196098	8.77e-06	2.77e-05	0.0044576	0.00609107	2.78795e-05	4.71092e-05
1.3	1	-1	0.00104913	0.0201398	8.38e-06	2.89e-05	0.00453289	0.00623698	2.9047e-05	4.64128e-05
1.4	1	-1	0.00102433	0.0205797	8.02e-06	2.98e-05	0.00460551	0.006355	2.99741e-05	4.59021e-05
1.5	1	-1	0.00100049	0.0209839	7.64e-06	3.06e-05	0.00468031	0.00646088	3.07885e-05	4.54297e-05
1.6	1	-1	0.000980931	0.0213426	7.27e-06	3.13e-05	0.00475382	0.00655265	3.14764e-05	4.5052e-05
1.7	1	-1	0.000962035	0.0216803	6.88e-06	3.19e-05	0.00482905	0.00663713	3.20926e-05	4.46963e-05
1.8	1	-1	0.000944307	0.0219977	6.5e-06	3.24e-05	0.00490533	0.0067148	3.26418e-05	4.43706e-05
1.9	1	-1	0.000929132	0.0222919	6.12e-06	3.29e-05	0.00498079	0.00678528	3.31241e-05	4.40966e-05
2	1	-1	0.000915082	0.0225718	5.73e-06	3.34e-05	0.00505674	0.00685102	3.35591e-05	4.38476e-05
1.2	1	0	0.00112918	0.0187195	8.94e-06	2.54e-05	0.00442233	0.00582277	2.55532e-05	4.83457e-05
1.3	1	0	0.00109748	0.0193349	8.58e-06	2.68e-05	0.00449401	0.00599699	2.69424e-05	4.75731e-05
1.4	1	0	0.00107019	0.0198517	8.22e-06	2.79e-05	0.0045658	0.00613977	2.80712e-05	4.69461e-05
1.5	1	0	0.00104627	0.0203012	7.85e-06	2.88e-05	0.00463783	0.00626106	2.90162e-05	4.64239e-05
1.6	1	0	0.00102253	0.0207166	7.47e-06	2.97e-05	0.00471265	0.00637057	2.98535e-05	4.59329e-05
1.7	1	0	0.00100257	0.0210861	7.1e-06	3.04e-05	0.00478644	0.00646578	3.05646e-05	4.55316e-05
1.8	1	0	0.000984426	0.021427	6.72e-06	3.1e-05	0.00486066	0.00655168	3.11899e-05	4.51789e-05
1.9	1	0	0.000966268	0.0217537	6.34e-06	3.16e-05	0.00493715	0.00663233	3.17614e-05	4.48355e-05
2	1	0	0.000951681	0.0220503	5.96e-06	3.21e-05	0.00501146	0.00670403	3.22541e-05	4.4564e-05
1.2	1	1	0.00117972	0.0176294	9.13e-06	2.27e-05	0.00438482	0.00549198	2.28042e-05	4.98095e-05
1.3	1	1	0.00114382	0.0184002	8.77e-06	2.44e-05	0.00445675	0.00571555	2.45496e-05	4.88555e-05
1.4	1	1	0.00111422	0.0190271	8.41e-06	2.58e-05	0.00452767	0.00589361	2.59482e-05	4.80923e-05
1.5	1	1	0.00108763	0.0195636	8.05e-06	2.7e-05	0.00459946	0.00604265	2.71137e-05	4.74437e-05
1.6	1	1	0.0010635	0.0200332	7.68e-06	2.79e-05	0.0046721	0.00617014	2.80991e-05	4.68869e-05
1.7	1	1	0.00104284	0.0204441	7.31e-06	2.88e-05	0.00474409	0.00627913	2.89269e-05	4.64301e-05
1.8	1	1	0.00102121	0.0208361	6.93e-06	2.95e-05	0.00481971	0.00638096	2.96861e-05	4.59759e-05
1.9	1	1	0.0010031	0.0211852	6.56e-06	3.01e-05	0.00489386	0.00646961	3.03301e-05	4.56092e-05
2	1	1	0.000989255	0.021495	6.2e-06	3.07e-05	0.00496498	0.0065466	3.08748e-05	4.53319e-05
1.2	1	2	0.00123788	0.0162763	9.35e-06	1.95e-05	0.00434164	0.00507931	1.95772e-05	5.15209e-05
1.3	1	2	0.0011906	0.0173039	8.96e-06	2.17e-05	0.00441913	0.00538313	2.1846e-05	5.02596e-05
1.4	1	2	0.00115661	0.018074	8.6e-06	2.34e-05	0.00449095	0.00560659	2.35547e-05	4.93406e-05
1.5	1	2	0.00112753	0.0187185	8.23e-06	2.48e-05	0.00456244	0.00579005	2.49714e-05	4.85685e-05
1.6	1	2	0.00110546	0.0192414	7.89e-06	2.59e-05	0.00463057	0.00593588	2.60961e-05	4.79873e-05
1.7	1	2	0.00108166	0.0197333	7.52e-06	2.7e-05	0.00470326	0.00607042	2.71278e-05	4.74042e-05
1.8	1	2	0.00106182	0.020157	7.16e-06	2.78e-05	0.00477448	0.00618372	2.79838e-05	4.69367e-05
1.9	1	2	0.0010402	0.020566	6.78e-06	2.86e-05	0.00485026	0.00629091	2.87813e-05	4.64573e-05
2	1	2	0.00102251	0.020925	6.4e-06	2.93e-05	0.00492384	0.00638287	2.94494e-05	4.60773e-05
1.2	1	3	0.00130367	0.0143087	9.6e-06	1.52e-05	0.00429281	0.00457601	1.52532e-05	5.37462e-05
1.3	1	3	0.00124949	0.0158794	9.2e-06	1.84e-05	0.00437178	0.00494942	1.85415e-05	5.20158e-05
1.4	1	3	0.00120701	0.0169002	8.82e-06	2.06e-05	0.00444731	0.0052516	2.07422e-05	5.08362e-05
1.5	1	3	0.00117297	0.017689	8.45e-06	2.23e-05	0.00452028	0.00548076	2.2454e-05	4.99164e-05
1.6	1	3	0.00114118	0.0183836	8.07e-06	2.38e-05	0.00459522	0.00567912	2.3958e-05	4.90705e-05
1.7	1	3	0.00111918	0.0189242	7.72e-06	2.5e-05	0.00466381	0.00583046	2.51077e-05	4.8474e-05
1.8	1	3	0.00109614	0.0194318	7.35e-06	2.6e-05	0.00473628	0.00597004	2.61661e-05	4.78832e-05
1.9	1	3	0.00107606	0.0198782	6.99e-06	2.69e-05	0.00480811	0.00609034	2.70694e-05	4.73819e-05
2	1	3	0.00105971	0.0202648	6.64e-06	2.77e-05	0.00487782	0.00619227	2.78223e-05	4.69856e-05
1.4	1	4	0.00126111	0.0153941	9.05e-06	1.72e-05	0.00440047	0.00479259	1.7343e-05	5.2582e-05
1.5	1	4	0.00121908	0.0165155	8.66e-06	1.96e-05	0.0044775	0.00512587	1.97109e-05	5.1324e-05
1.6	1	4	0.00118443	0.0173427	8.29e-06	2.13e-05	0.00455242	0.00536662	2.14707e-05	5.03746e-05
1.7	1	4	0.00115847	0.0179892	7.93e-06	2.27e-05	0.00462249	0.00555135	2.284e-05	4.96626e-05
1.8	1	4	0.00113411	0.01857	7.57e-06	2.39e-05	0.004694	0.00571461	2.40594e-05	4.9005e-05
1.9	1	4	0.00111079	0.0191025	7.2e-06	2.5e-05	0.0047673	0.00586184	2.51614e-05	4.83889e-05
2	1	4	0.00109094	0.0195666	6.83e-06	2.59e-05	0.00483918	0.00598773	2.60979e-05	4.78729e-05
1.5	1	5	0.00127369	0.0147542	8.92e-06	1.58e-05	0.00442683	0.00479938	1.58622e-05	5.32851e-05
1.6	1	5	0.0012362	0.015981	8.54e-06	1.83e-05	0.00450119	0.00495531	1.83843e-05	5.20005e-05
1.7	1	5	0.00120169	0.0168942	8.16e-06	2.02e-05	0.00457705	0.00522275	2.0293e-05	5.09847e-05
1.8	1	5	0.00117111	0.0176267	7.78e-06	2.17e-05	0.0046528	0.00543304	2.18216e-05	5.01486e-05
1.9	1	5	0.00114901	0.0181974	7.42e-06	2.29e-05	0.00472238	0.00559379	2.29985e-05	4.95401e-05
2	1	5	0.00112592	0.0187446	7.05e-06	2.4e-05	0.00479591	0.00574569	2.41168e-05	4.89206e-05
1.7	1	6	0.00124844	0.0153939	8.41e-06	1.69e-05	0.00452789	0.00496781	1.69842e-05	5.26547e-05
1.8	1	6	0.00121972	0.0163512	8.05e-06	1.88e-05	0.00459868	0.00508581	1.8943e-05	5.16765e-05
1.9	1	6	0.00118881	0.0171683	7.66e-06	2.05e-05	0.0046756	0.00528705	2.06254e-05	5.07694e-05
2	1	6	0.00116166	0.017832	7.28e-06	2.18e-05	0.0047517	0.00547527	2.19806e-05	5.00248e-05
1.9	1	7	0.0012323	0.0157633	7.92e-06	1.74e-05	0.00462448	0.00512881	1.75319e-05	5.2335e-05
2	1	7	0.0012016	0.016702	7.53e-06	1.93e-05	0.00470229	0.00525848	1.94366e-05	5.13285e-05
1.2	1.5	-5	0.000864739	0.0224782	7.95e-06	3.55e-05	0.00461861	0.00693768	3.56836e-05	4.27535e-05
1.3	1.5	-5	0.00084601	0.0227909	7.56e-06	3.6e-05	0.00469622	0.00701294	3.62269e-05	4.24596e-05
1.4	1.5	-5	0.000827467	0.0230909	7.15e-06	3.65e-05	0.00477599	0.00708338	3.67142e-05	4.21746e-05
1.5	1.5	-5	0.000810197	0.0233766	6.74e-06	3.69e-05	0.00485687	0.00714883	3.71462e-05	4.19192e-05
1.6	1.5	-5	0.000793779	0.0236515	6.33e-06	3.73e-05	0.00493904	0.00721042	3.75337e-05	4.16849e-05
1.7	1.5	-5	0.000779355	0.0239153	5.91e-06	3.77e-05	0.00502115	0.00726842	3.78832e-05	4.1486e-05
1.8	1.5	-5	0.000766573	0.0241687	5.5e-06	3.8e-05	0.00510322	0.00732308	3.81974e-05	4.13172e-05
1.9	1.5	-5	0.000752548	0.0244209	5.07e-06	3.83e-05	0.00518832	0.00737636	3.84868e-05	4.11312e-05
2	1.5	-5	0.000741053	0.0246615	4.64e-06	3.85e-05	0.00527203	0.00742635	3.87453e-05	4.09907e-05
1.2	1.5	-4	0.000921456	0.0218314	8.16e-06	3.37e-05	0.00457651	0.00674921	3.38901e-05	4.37709e-05
1.3	1.5	-4	0.000899493	0.0221744	7.77e-06	3.43e-05	0.00465322	0.00683466	3.45319e-05	4.33919e-05
1.4	1.5	-4	0.000879674	0.0224932	7.38e-06	3.49e-05	0.00473078	0.00691206	3.50912e-05	4.30575e-05
1.5	1.5	-4	0.000863245	0.0227883	6.99e-06	3.54e-05	0.00480765	0.00698205	3.55778e-05	4.27901e-05
1.6	1.5	-4	0.000847329	0.023072	6.6e-06	3.58e-05	0.00488605	0.00704787	3.60175e-05	4.2536e-05
1.7	1.5	-4	0.000832635	0.0233443	6.2e-06	3.62e-05	0.00496512	0.00710978	3.6415e-05	4.23074e-05
1.8	1.5	-4	0.000819756	0.023605	5.8e-06	3.66e-05	0.005044	0.007168	3.67747e-05	4.21129e-05
1.9	1.5	-4	0.000805556	0.0238641	5.38e-06	3.69e-05	0.00512602	0.0072247	3.71087e-05	4.19016e-05
2	1.5	-4	0.000793099	0.0241145	4.97e-06	3.72e-05	0.00520765	0.00727865	3.7415e-05	4.1721e-05
1.2	1.5	-3	0.00097337	0.021166	8.36e-06	3.19e-05	0.00453798	0.00655347	3.20561e-05	4.47812e-05
1.3	1.5	-3	0.000948507	0.0215536	7.97e-06	3.26e-05	0.0046138	0.00665356	3.28339e-05	4.4322e-05
1.4	1.5	-3	0.000929689	0.0218932	7.6e-06	3.33e-05	0.00468747	0.00673899	3.34763e-05	4.39827e-05
1.5	1.5	-3	0.000909297	0.0222204	7.21e-06	3.39e-05	0.00476492	0.00681923	3.40582e-05	4.36246e-05
1.6	1.5	-3	0.000891335	0.0225253	6.82e-06	3.44e-05	0.00484249	0.00689228	3.4569e-05	4.33138e-05
1.7	1.5	-3	0.000876624	0.0228072	6.43e-06	3.48e-05	0.00491887	0.00695832	3.50131e-05	4.30679e-05
1.8	1.5	-3	0.000863504	0.0230755	6.04e-06	3.52e-05	0.00499529	0.00701996	3.54127e-05	4.28536e-05
1.9	1.5	-3	0.000848997	0.0233425	5.64e-06	3.56e-05	0.00507497	0.00708013	3.57876e-05	4.26179e-05
2	1.5	-3	0.000838376	0.023591	5.25e-06	3.59e-05	0.00515163	0.00713528	3.61201e-05	4.24515e-05
1.2	1.5	-2	0.00102617	0.0204423	8.56e-06	2.99e-05	0.00449879	0.00633925	3.00934e-05	4.58693e-05
1.3	1.5	-2	0.000999763	0.0208794	8.18e-06	3.08e-05	0.00457259	0.00645589	3.10186e-05	4.53489e-05
1.4	1.5	-2	0.000975487	0.0212747	7.8e-06	3.16e-05	0.00464781	0.00655873	3.18142e-05	4.48859e-05
1.5	1.5	-2	0.000953676	0.0216345	7.42e-06	3.23e-05	0.00472375	0.00664998	3.24995e-05	4.44812e-05
1.6	1.5	-2	0.000936003	0.0219586	7.04e-06	3.29e-05	0.00479829	0.00673024	3.30835e-05	4.41587e-05
1.7	1.5	-2	0.000919056	0.0222652	6.66e-06	3.34e-05	0.00487425	0.00680448	3.36055e-05	4.38569e-05
1.8	1.5	-2	0.000903472	0.022555	6.27e-06	3.39e-05	0.00495079	0.00687311	3.40711e-05	4.35851e-05
1.9	1.5	-2	0.000888605	0.0228334	5.88e-06	3.43e-05	0.00502842	0.00693771	3.44938e-05	4.33297e-05
2	1.5	-2	0.000877263	0.0230908	5.49e-06	3.47e-05	0.00510353	0.0069964	3.48646e-05	4.31389e-05
1.2	1.5	-1	0.0010785	0.019648	8.75e-06	2.78e-05	0.00445995	0.00610238	2.79776e-05	4.70399e-05
1.3	1.5	-1	0.00104856	0.0201598	8.38e-06	2.89e-05	0.00453335	0.00624308	2.91028e-05	4.63971e-05
1.4	1.5	-1	0.00102088	0.0206141	8e-06	2.99e-05	0.0046085	0.00636488	3.00599e-05	4.58331e-05
1.5	1.5	-1	0.000999745	0.0210032	7.63e-06	3.07e-05	0.004681	0.00646665	3.08418e-05	4.54105e-05
1.6	1.5	-1	0.000978935	0.0213672	7.26e-06	3.14e-05	0.0047558	0.00655969	3.1539e-05	4.50111e-05
1.7	1.5	-1	0.000959959	0.0217036	6.87e-06	3.2e-05	0.00483124	0.00664372	3.21506e-05	4.4657e-05
1.8	1.5	-1	0.000944209	0.0220112	6.5e-06	3.25e-05	0.00490544	0.0067189	3.26813e-05	4.43665e-05
1.9	1.5	-1	0.000926909	0.0223145	6.1e-06	3.3e-05	0.0049834	0.00679149	3.31776e-05	4.40564e-05
2	1.5	-1	0.000912796	0.0225942	5.72e-06	3.34e-05	0.00505957	0.0068571	3.36109e-05	4.38063e-05
1.2	1.5	0	0.0011285	0.0187439	8.94e-06	2.55e-05	0.00442283	0.00583025	2.56178e-05	4.83216e-05
1.3	1.5	0	0.00109411	0.0193761	8.57e-06	2.69e-05	0.00449672	0.00600911	2.70452e-05	4.74948e-05
1.4	1.5	0	0.0010667	0.0198895	8.2e-06	2.8e-05	0.00456882	0.00615073	2.81644e-05	4.6871e-05
1.5	1.5	0	0.00104267	0.0203372	7.84e-06	2.89e-05	0.00464117	0.00627134	2.91034e-05	4.63493e-05
1.6	1.5	0	0.00102153	0.0207354	7.47e-06	2.97e-05	0.00471364	0.00637614	2.99031e-05	4.591e-05
1.7	1.5	0	0.00100151	0.0211041	7.09e-06	3.04e-05	0.00478755	0.00647102	3.06114e-05	4.55098e-05
1.8	1.5	0	0.000983308	0.0214451	6.72e-06	3.11e-05	0.0048619	0.00655693	3.12367e-05	4.51549e-05
1.9	1.5	0	0.000965914	0.0217673	6.34e-06	3.16e-05	0.00493756	0.00663638	3.17992e-05	4.48256e-05
2	1.5	0	0.000951288	0.0220638	5.96e-06	3.21e-05	0.00501195	0.00670802	3.22912e-05	4.45535e-05
1.2	1.5	1	0.00117646	0.0176821	9.12e-06	2.28e-05	0.00438723	0.00550785	2.29316e-05	4.97232e-05
1.3	1.5	1	0.00114043	0.0184487	8.76e-06	2.45e-05	0.00445947	0.00573001	2.46683e-05	4.87692e-05
1.4	1.5	1	0.00111073	0.0190713	8.4e-06	2.59e-05	0.00453069	0.0059066	2.6056e-05	4.8009e-05
1.5	1.5	1	0.00108403	0.0196046	8.03e-06	2.71e-05	0.0046028	0.00605451	2.72127e-05	4.73623e-05
1.6	1.5	1	0.00106238	0.0200538	7.67e-06	2.8e-05	0.00467321	0.00617623	2.8152e-05	4.68592e-05
1.7	1.5	1	0.00103907	0.0204808	7.29e-06	2.88e-05	0.00474806	0.00628947	2.90126e-05	4.63513e-05
1.8	1.5	1	0.00102261	0.0208386	6.94e-06	2.95e-05	0.00481815	0.00638213	2.97007e-05	4.59987e-05
1.9	1.5	1	0.00100447	0.0211877	6.56e-06	3.02e-05	0.00489224	0.00647075	3.03449e-05	4.56315e-05
2	1.5	1	0.000985269	0.0215289	6.17e-06	3.08e-05	0.00496991	0.0065557	3.09482e-05	4.52548e-05
1.2	1.5	2	0.00123382	0.0163464	9.34e-06	1.96e-05	0.00434466	0.00510058	1.97364e-05	5.14149e-05
1.3	1.5	2	0.00119196	0.0173062	8.97e-06	2.17e-05	0.00441803	0.0053841	2.18559e-05	5.02824e-05
1.4	1.5	2	0.00115794	0.0180764	8.6e-06	2.34e-05	0.00448981	0.00560757	2.35652e-05	4.93626e-05
1.5	1.5	2	0.00112882	0.0187207	8.24e-06	2.48e-05	0.00456124	0.00579103	2.49824e-05	4.85897e-05
1.6	1.5	2	0.00110181	0.019286	7.87e-06	2.6e-05	0.00463419	0.00594881	2.62021e-05	4.79009e-05
1.7	1.5	2	0.00107793	0.0197752	7.5e-06	2.71e-05	0.00470719	0.00608239	2.7226e-05	4.73195e-05
1.8	1.5	2	0.00105802	0.020197	7.14e-06	2.79e-05	0.00477872	0.00619497	2.80759e-05	4.68526e-05
1.9	1.5	2	0.00104139	0.020568	6.78e-06	2.86e-05	0.00484886	0.00629187	2.87933e-05	4.64767e-05
2	1.5	2	0.00102368	0.0209269	6.41e-06	2.93e-05	0.00492239	0.0063838	2.94615e-05	4.60963e-05
1.2	1.5	3	0.00129968	0.014421	9.58e-06	1.54e-05	0.00429577	0.00458095	1.54858e-05	5.36103e-05
1.3	1.5	3	0.00124536	0.0159579	9.18e-06	1.86e-05	0.0043751	0.0049732	1.87148e-05	5.19008e-05
1.4	1.5	3	0.00120818	0.016902	8.82e-06	2.06e-05	0.0044463	0.00525239	2.07503e-05	5.08559e-05
1.5	1.5	3	0.00116958	0.0177408	8.43e-06	2.24e-05	0.00452343	0.00549613	2.25741e-05	4.98298e-05
1.6	1.5	3	0.00114229	0.0183853	8.07e-06	2.38e-05	0.00459413	0.00567991	2.39668e-05	4.90887e-05
1.7	1.5	3	0.00111549	0.0189725	7.7e-06	2.51e-05	0.00466769	0.00584444	2.52202e-05	4.83831e-05
1.8	1.5	3	0.0010972	0.0194335	7.36e-06	2.6e-05	0.00473509	0.00597083	2.61756e-05	4.79006e-05
1.9	1.5	3	0.0010771	0.0198798	7e-06	2.69e-05	0.00480689	0.00609111	2.70791e-05	4.73989e-05
2	1.5	3	0.00105584	0.0203061	6.61e-06	2.77e-05	0.00488261	0.00620378	2.79148e-05	4.68997e-05
1.4	1.5	4	0.00126216	0.0153955	9.06e-06	1.72e-05	0.00439956	0.00479321	1.73489e-05	5.25999e-05
1.5	1.5	4	0.00122009	0.016517	8.67e-06	1.96e-05	0.00447656	0.00512653	1.97175e-05	5.13412e-05
1.6	1.5	4	0.00118542	0.0173441	8.29e-06	2.13e-05	0.00455145	0.00536727	2.14776e-05	5.03911e-05
1.7	1.5	4	0.00115944	0.0179907	7.94e-06	2.27e-05	0.00462148	0.00555202	2.28475e-05	4.96786e-05
1.8	1.5	4	0.00113041	0.0186205	7.55e-06	2.4e-05	0.00469812	0.00572923	2.41744e-05	4.89148e-05
1.9	1.5	4	0.00111172	0.0191038	7.2e-06	2.5e-05	0.00476621	0.0058625	2.51693e-05	4.8404e-05
2	1.5	4	0.00109185	0.0195678	6.84e-06	2.6e-05	0.00483805	0.00598838	2.61059e-05	4.78878e-05
1.5	1.5	5	0.00127461	0.0147553	8.93e-06	1.58e-05	0.00442597	0.00479795	1.58669e-05	5.33008e-05
1.6	1.5	5	0.00123709	0.0159822	8.55e-06	1.83e-05	0.0045003	0.00495584	1.83897e-05	5.20157e-05
1.7	1.5	5	0.00120256	0.0168954	8.17e-06	2.02e-05	0.00457613	0.00522332	2.0299e-05	5.09995e-05
1.8	1.5	5	0.00117196	0.0176279	7.78e-06	2.17e-05	0.00465186	0.00543361	2.18279e-05	5.01627e-05
1.9	1.5	5	0.00114984	0.0181985	7.43e-06	2.29e-05	0.0047214	0.00559435	2.30049e-05	4.9554e-05
2	1.5	5	0.00112673	0.0187457	7.06e-06	2.4e-05	0.0047949	0.00574625	2.41236e-05	4.89342e-05
1.7	1.5	6	0.00124923	0.0153949	8.41e-06	1.69e-05	0.00452705	0.00496642	1.69886e-05	5.26682e-05
1.8	1.5	6	0.00121539	0.0164359	8.03e-06	1.9e-05	0.0046035	0.00509383	1.91248e-05	5.15524e-05
1.9	1.5	6	0.00118957	0.0171692	7.67e-06	2.05e-05	0.00467471	0.00528751	2.06305e-05	5.0782e-05
2	1.5	6	0.00116239	0.0178329	7.28e-06	2.19e-05	0.00475079	0.00547574	2.1986e-05	5.00369e-05
1.9	1.5	7	0.001233	0.015764	7.92e-06	1.74e-05	0.00462367	0.00512745	1.75357e-05	5.23466e-05
2	1.5	7	0.00120227	0.0167027	7.53e-06	1.93e-05	0.00470146	0.00525709	1.94408e-05	5.13397e-05
1.2	2	-5	0.000863342	0.0224885	7.94e-06	3.55e-05	0.00461965	0.00694058	3.57103e-05	4.27291e-05
1.3	2	-5	0.000844544	0.0228011	7.55e-06	3.6e-05	0.0046974	0.00701574	3.62523e-05	4.24346e-05
1.4	2	-5	0.000825939	0.0231003	7.15e-06	3.65e-05	0.00477731	0.00708588	3.67361e-05	4.21514e-05
1.5	2	-5	0.000808609	0.0233857	6.74e-06	3.69e-05	0.00485834	0.00715124	3.71668e-05	4.18959e-05
1.6	2	-5	0.000794891	0.0236548	6.33e-06	3.73e-05	0.00493794	0.00721172	3.75507e-05	4.17037e-05
1.7	2	-5	0.000780447	0.0239185	5.92e-06	3.77e-05	0.00502	0.00726971	3.79003e-05	4.15047e-05
1.8	2	-5	0.000766006	0.0241757	5.49e-06	3.8e-05	0.00510385	0.00732502	3.82157e-05	4.13098e-05
1.9	2	-5	0.000753602	0.024424	5.07e-06	3.83e-05	0.00518708	0.00737763	3.85039e-05	4.11495e-05
2	2	-5	0.000742091	0.0246645	4.65e-06	3.85e-05	0.00527075	0.00742761	3.87625e-05	4.10089e-05
1.2	2	-4	0.000919965	0.021841	8.16e-06	3.37e-05	0.00457762	0.00675187	3.39138e-05	4.3745e-05
1.3	2	-4	0.000900344	0.0221767	7.78e-06	3.43e-05	0.00465253	0.00683556	3.45429e-05	4.34059e-05
1.4	2	-4	0.000880507	0.0224955	7.39e-06	3.49e-05	0.00473006	0.00691296	3.51025e-05	4.30714e-05
1.5	2	-4	0.000864062	0.0227905	7e-06	3.54e-05	0.00480689	0.00698292	3.5589e-05	4.28036e-05
1.6	2	-4	0.000848132	0.0230742	6.6e-06	3.58e-05	0.00488525	0.00704875	3.60289e-05	4.25494e-05
1.7	2	-4	0.0008309	0.0233537	6.19e-06	3.62e-05	0.00496695	0.00711217	3.6434e-05	4.22787e-05
1.8	2	-4	0.000817984	0.0236141	5.79e-06	3.66e-05	0.00504598	0.00717023	3.67916e-05	4.20851e-05
1.9	2	-4	0.000806319	0.0238661	5.39e-06	3.69e-05	0.00512513	0.00722554	3.71201e-05	4.19145e-05
2	2	-4	0.00079385	0.0241164	4.97e-06	3.72e-05	0.00520672	0.00727948	3.74263e-05	4.17337e-05
1.2	2	-3	0.000974035	0.0211677	8.36e-06	3.19e-05	0.00453748	0.00655413	3.20639e-05	4.47922e-05
1.3	2	-3	0.000949155	0.0215553	7.98e-06	3.26e-05	0.00461328	0.00665421	3.28418e-05	4.43325e-05
1.4	2	-3	0.000928078	0.021903	7.59e-06	3.33e-05	0.00468886	0.00674164	3.34987e-05	4.39539e-05
1.5	2	-3	0.000909918	0.0222219	7.21e-06	3.39e-05	0.00476435	0.00681986	3.40662e-05	4.36348e-05
1.6	2	-3	0.000891944	0.0225268	6.82e-06	3.44e-05	0.00484189	0.0068929	3.45769e-05	4.33239e-05
1.7	2	-3	0.000877222	0.0228087	6.43e-06	3.48e-05	0.00491824	0.00695894	3.50212e-05	4.30777e-05
1.8	2	-3	0.000861745	0.0230849	6.03e-06	3.52e-05	0.00499725	0.00702231	3.54307e-05	4.28234e-05
1.9	2	-3	0.000849577	0.0233438	5.64e-06	3.56e-05	0.00507429	0.00708073	3.57957e-05	4.26274e-05
2	2	-3	0.00083656	0.0236002	5.24e-06	3.59e-05	0.00515388	0.00713746	3.61356e-05	4.24218e-05
1.2	2	-2	0.0010267	0.0204436	8.56e-06	2.99e-05	0.0044984	0.00633975	3.00991e-05	4.5878e-05
1.3	2	-2	0.00100028	0.0208806	8.19e-06	3.08e-05	0.00457217	0.00645637	3.10243e-05	4.53573e-05
1.4	2	-2	0.00097599	0.0212759	7.8e-06	3.16e-05	0.00464737	0.00655921	3.18201e-05	4.48941e-05
1.5	2	-2	0.000954168	0.0216356	7.42e-06	3.23e-05	0.00472329	0.00665045	3.25054e-05	4.44891e-05
1.6	2	-2	0.000934341	0.0219689	7.03e-06	3.29e-05	0.00479993	0.00673298	3.3106e-05	4.41279e-05
1.7	2	-2	0.000917362	0.0222754	6.65e-06	3.34e-05	0.00487603	0.00680712	3.36267e-05	4.38258e-05
1.8	2	-2	0.000903937	0.0225561	6.27e-06	3.39e-05	0.00495027	0.00687357	3.40771e-05	4.35927e-05
1.9	2	-2	0.000889063	0.0228344	5.88e-06	3.43e-05	0.00502788	0.00693817	3.44999e-05	4.33373e-05
2	2	-2	0.000877715	0.0230918	5.5e-06	3.47e-05	0.00510297	0.00699684	3.48706e-05	4.31463e-05
1.2	2	-1	0.00107893	0.019649	8.76e-06	2.78e-05	0.00445962	0.00610276	2.79818e-05	4.7047e-05
1.3	2	-1	0.00104624	0.0201763	8.37e-06	2.9e-05	0.00453522	0.00624771	2.91414e-05	4.63517e-05
1.4	2	-1	0.00102129	0.020615	8e-06	2.99e-05	0.00460814	0.00636524	3.00642e-05	4.58397e-05
1.5	2	-1	0.00100015	0.0210041	7.64e-06	3.07e-05	0.00468063	0.00646702	3.08463e-05	4.54171e-05
1.6	2	-1	0.000979329	0.021368	7.26e-06	3.14e-05	0.00475541	0.00656005	3.15434e-05	4.50174e-05
1.7	2	-1	0.000960346	0.0217045	6.88e-06	3.2e-05	0.00483083	0.00664408	3.21551e-05	4.46634e-05
1.8	2	-1	0.000944589	0.0220121	6.5e-06	3.25e-05	0.00490501	0.00671926	3.26859e-05	4.43728e-05
1.9	2	-1	0.000927282	0.0223152	6.11e-06	3.3e-05	0.00498296	0.00679182	3.3182e-05	4.40623e-05
2	2	-1	0.000913164	0.022595	5.72e-06	3.34e-05	0.00505911	0.00685744	3.36155e-05	4.38123e-05
1.2	2	0	0.00112887	0.0187447	8.94e-06	2.55e-05	0.00442256	0.00583055	2.5621e-05	4.83276e-05
1.3	2	0	0.00109446	0.0193768	8.57e-06	2.69e-05	0.00449644	0.00600939	2.70484e-05	4.75006e-05
1.4	2	0	0.00106705	0.0198902	8.2e-06	2.8e-05	0.00456852	0.00615104	2.81679e-05	4.68768e-05
1.5	2	0	0.00104301	0.0203379	7.84e-06	2.89e-05	0.00464086	0.00627164	2.91069e-05	4.6355e-05
1.6	2	0	0.00102186	0.0207361	7.47e-06	2.97e-05	0.00471331	0.00637642	2.99067e-05	4.59156e-05
1.7	2	0	0.000999098	0.0211203	7.08e-06	3.05e-05	0.00479008	0.00647535	3.06459e-05	4.54634e-05
1.8	2	0	0.000980866	0.0214604	6.7e-06	3.11e-05	0.00486462	0.00656091	3.12676e-05	4.51103e-05
1.9	2	0	0.000964261	0.021778	6.33e-06	3.16e-05	0.0049395	0.00663916	3.18207e-05	4.4796e-05
2	2	0	0.000951595	0.0220644	5.96e-06	3.21e-05	0.00501157	0.0067083	3.22949e-05	4.45586e-05
1.2	2	1	0.00117677	0.0176827	9.12e-06	2.28e-05	0.004387	0.00550809	2.2934e-05	4.97284e-05
1.3	2	1	0.00114074	0.0184493	8.76e-06	2.45e-05	0.00445923	0.00573023	2.46707e-05	4.8774e-05
1.4	2	1	0.00111102	0.0190718	8.4e-06	2.59e-05	0.00453044	0.00590683	2.60586e-05	4.80139e-05
1.5	2	1	0.00108431	0.0196051	8.03e-06	2.71e-05	0.00460253	0.00605475	2.72154e-05	4.73671e-05
1.6	2	1	0.00106267	0.0200543	7.68e-06	2.8e-05	0.00467293	0.00617645	2.81547e-05	4.68636e-05
1.7	2	1	0.00103934	0.0204813	7.3e-06	2.88e-05	0.00474776	0.00628969	2.90155e-05	4.63559e-05
1.8	2	1	0.00102288	0.0208391	6.94e-06	2.95e-05	0.00481785	0.00638235	2.97036e-05	4.60031e-05
1.9	2	1	0.00100474	0.0211882	6.57e-06	3.02e-05	0.00489193	0.00647098	3.03478e-05	4.56359e-05
2	2	1	0.000985531	0.0215294	6.17e-06	3.08e-05	0.00496959	0.00655592	3.09511e-05	4.5259e-05
1.2	2	2	0.00123409	0.0163469	9.34e-06	1.96e-05	0.00434445	0.00510077	1.97382e-05	5.14195e-05
1.3	2	2	0.00119223	0.0173067	8.97e-06	2.17e-05	0.00441782	0.00538429	2.18579e-05	5.02869e-05
1.4	2	2	0.0011582	0.0180768	8.6e-06	2.34e-05	0.00448959	0.00560776	2.35673e-05	4.93668e-05
1.5	2	2	0.00112907	0.0187212	8.24e-06	2.48e-05	0.00456101	0.00579122	2.49845e-05	4.85938e-05
1.6	2	2	0.00110205	0.0192864	7.87e-06	2.6e-05	0.00463395	0.00594899	2.62042e-05	4.79049e-05
1.7	2	2	0.00107817	0.0197756	7.5e-06	2.71e-05	0.00470694	0.00608256	2.72281e-05	4.73232e-05
1.8	2	2	0.00105825	0.0201974	7.14e-06	2.79e-05	0.00477846	0.00619516	2.80782e-05	4.68565e-05
1.9	2	2	0.00104162	0.0205684	6.79e-06	2.86e-05	0.00484859	0.00629204	2.87955e-05	4.64803e-05
2	2	2	0.00102391	0.0209273	6.41e-06	2.93e-05	0.00492211	0.00638399	2.94639e-05	4.61001e-05
1.2	2	3	0.00129992	0.0144213	9.59e-06	1.54e-05	0.00429559	0.00458065	1.5487e-05	5.36146e-05
1.3	2	3	0.00124559	0.0159582	9.18e-06	1.86e-05	0.00437491	0.00497335	1.87162e-05	5.19048e-05
1.4	2	3	0.00120299	0.0169672	8.8e-06	2.08e-05	0.00445079	0.00527169	2.08951e-05	5.07319e-05
1.5	2	3	0.0011698	0.0177412	8.43e-06	2.24e-05	0.00452322	0.00549628	2.25757e-05	4.98334e-05
1.6	2	3	0.0011425	0.0183857	8.08e-06	2.38e-05	0.00459392	0.00568007	2.39687e-05	4.90924e-05
1.7	2	3	0.0011157	0.0189728	7.7e-06	2.51e-05	0.00466747	0.0058446	2.5222e-05	4.83865e-05
1.8	2	3	0.00109741	0.0194338	7.36e-06	2.6e-05	0.00473486	0.00597098	2.61774e-05	4.7904e-05
1.9	2	3	0.0010773	0.0198802	7e-06	2.69e-05	0.00480665	0.00609127	2.7081e-05	4.74023e-05
2	2	3	0.00105604	0.0203064	6.61e-06	2.78e-05	0.00488236	0.00620393	2.79167e-05	4.69029e-05
1.4	2	4	0.00126237	0.0153958	9.06e-06	1.72e-05	0.00439938	0.00479334	1.73501e-05	5.26034e-05
1.5	2	4	0.00122029	0.0165172	8.67e-06	1.96e-05	0.00447637	0.00512664	1.97187e-05	5.13444e-05
1.6	2	4	0.00118561	0.0173444	8.29e-06	2.14e-05	0.00455126	0.00536741	2.1479e-05	5.03944e-05
1.7	2	4	0.00115692	0.0180213	7.92e-06	2.28e-05	0.00462412	0.0055609	2.29156e-05	4.96185e-05
1.8	2	4	0.0011306	0.0186208	7.55e-06	2.4e-05	0.00469791	0.00572936	2.41759e-05	4.89179e-05
1.9	2	4	0.0011119	0.0191041	7.2e-06	2.5e-05	0.004766	0.00586264	2.51709e-05	4.84071e-05
2	2	4	0.00109203	0.0195681	6.84e-06	2.6e-05	0.00483784	0.00598851	2.61075e-05	4.78907e-05
1.5	2	5	0.00127479	0.0147555	8.93e-06	1.58e-05	0.00442581	0.00479768	1.58678e-05	5.33039e-05
1.6	2	5	0.00123727	0.0159824	8.55e-06	1.83e-05	0.00450013	0.00495594	1.83907e-05	5.20187e-05
1.7	2	5	0.00120273	0.0168956	8.17e-06	2.02e-05	0.00457595	0.00522342	2.03001e-05	5.10022e-05
1.8	2	5	0.00117212	0.0176281	7.78e-06	2.17e-05	0.00465168	0.00543371	2.18291e-05	5.01654e-05
1.9	2	5	0.00114734	0.0182296	7.41e-06	2.29e-05	0.00472433	0.00560326	2.30726e-05	4.94937e-05
2	2	5	0.00112689	0.0187459	7.06e-06	2.4e-05	0.00479471	0.00574635	2.41248e-05	4.89368e-05
1.7	2	6	0.00124939	0.015395	8.41e-06	1.69e-05	0.00452689	0.00496615	1.69894e-05	5.26708e-05
1.8	2	6	0.00121554	0.0164361	8.03e-06	1.9e-05	0.00460333	0.00509355	1.91258e-05	5.1555e-05
1.9	2	6	0.00118972	0.0171694	7.67e-06	2.05e-05	0.00467454	0.0052876	2.06316e-05	5.07845e-05
2	2	6	0.00116254	0.0178331	7.28e-06	2.19e-05	0.00475061	0.00547582	2.1987e-05	5.00392e-05
1.9	2	7	0.00123313	0.0157642	7.93e-06	1.74e-05	0.00462351	0.00512719	1.75365e-05	5.23489e-05
2	2	7	0.0012024	0.0167029	7.53e-06	1.93e-05	0.00470129	0.00525682	1.94418e-05	5.13421e-05
1.2	2.5	-5	0.000867332	0.0224577	7.96e-06	3.54e-05	0.00461669	0.00693188	3.56297e-05	4.27976e-05
1.3	2.5	-5	0.000846106	0.0227774	7.56e-06	3.6e-05	0.00469615	0.0070088	3.61844e-05	4.24595e-05
1.4	2.5	-5	0.000827657	0.0230765	7.15e-06	3.65e-05	0.00477583	0.007079	3.66693e-05	4.21784e-05
1.5	2.5	-5	0.000813186	0.0233556	6.76e-06	3.69e-05	0.0048541	0.00714317	3.70959e-05	4.19682e-05
1.6	2.5	-5	0.000796878	0.0236312	6.34e-06	3.73e-05	0.00493598	0.00720507	3.74875e-05	4.17327e-05
1.7	2.5	-5	0.000781863	0.0238967	5.93e-06	3.76e-05	0.00501852	0.0072635	3.78402e-05	4.15234e-05
1.8	2.5	-5	0.000767535	0.0241542	5.5e-06	3.79e-05	0.00510214	0.00731898	3.8158e-05	4.1329e-05
1.9	2.5	-5	0.000755227	0.024402	5.08e-06	3.82e-05	0.00518517	0.00737148	3.84458e-05	4.11709e-05
2	2.5	-5	0.000742146	0.0246472	4.65e-06	3.85e-05	0.00527068	0.00742241	3.87085e-05	4.10035e-05
1.2	2.5	-4	0.000921935	0.0218185	8.17e-06	3.37e-05	0.00457616	0.0067453	3.38519e-05	4.3782e-05
1.3	2.5	-4	0.000900053	0.0221621	7.78e-06	3.43e-05	0.00465277	0.00683099	3.4496e-05	4.34029e-05
1.4	2.5	-4	0.000880309	0.0224811	7.39e-06	3.48e-05	0.00473023	0.00690848	3.50565e-05	4.30695e-05
1.5	2.5	-4	0.000863946	0.0227763	7e-06	3.53e-05	0.004807	0.00697855	3.55441e-05	4.28025e-05
1.6	2.5	-4	0.00084809	0.0230604	6.6e-06	3.58e-05	0.00488529	0.00704454	3.59857e-05	4.25481e-05
1.7	2.5	-4	0.000833453	0.0233324	6.2e-06	3.62e-05	0.00496426	0.0071064	3.63829e-05	4.23209e-05
1.8	2.5	-4	0.000820625	0.0235926	5.8e-06	3.65e-05	0.00504304	0.00716451	3.67418e-05	4.2128e-05
1.9	2.5	-4	0.000806476	0.0238522	5.39e-06	3.69e-05	0.00512494	0.00722137	3.70778e-05	4.19159e-05
2	2.5	-4	0.000794065	0.0241025	4.97e-06	3.72e-05	0.00520645	0.00727536	3.73848e-05	4.17355e-05
1.2	2.5	-3	0.000976284	0.0211447	8.37e-06	3.18e-05	0.00453582	0.00654743	3.20029e-05	4.48363e-05
1.3	2.5	-3	0.000951527	0.0215328	7.99e-06	3.26e-05	0.00461137	0.00664777	3.27834e-05	4.43784e-05
1.4	2.5	-3	0.000928318	0.0218897	7.6e-06	3.33e-05	0.00468866	0.0067376	3.34592e-05	4.39603e-05
1.5	2.5	-3	0.000910228	0.0222089	7.21e-06	3.38e-05	0.00476406	0.00681594	3.40278e-05	4.3642e-05
1.6	2.5	-3	0.000894614	0.0225056	6.83e-06	3.43e-05	0.00483925	0.0068871	3.45263e-05	4.33727e-05
1.7	2.5	-3	0.000877652	0.022796	6.44e-06	3.48e-05	0.00491779	0.00695521	3.4985e-05	4.30863e-05
1.8	2.5	-3	0.000864575	0.0230649	6.05e-06	3.52e-05	0.0049941	0.00701705	3.53869e-05	4.2871e-05
1.9	2.5	-3	0.00085011	0.0233312	5.65e-06	3.55e-05	0.00507366	0.00707704	3.57603e-05	4.26377e-05
2	2.5	-3	0.000839523	0.0235795	5.26e-06	3.59e-05	0.00515021	0.00713218	3.6093e-05	4.24718e-05
1.2	2.5	-2	0.0010279	0.0204252	8.56e-06	2.99e-05	0.00449751	0.00633428	3.00494e-05	4.5904e-05
1.3	2.5	-2	0.000998648	0.0208767	8.18e-06	3.08e-05	0.00457348	0.00645483	3.10061e-05	4.53307e-05
1.4	2.5	-2	0.000976489	0.0212631	7.81e-06	3.16e-05	0.00464694	0.00655538	3.17841e-05	4.49046e-05
1.5	2.5	-2	0.000956847	0.0216138	7.43e-06	3.23e-05	0.0047208	0.00664439	3.24529e-05	4.4539e-05
1.6	2.5	-2	0.000937102	0.0219474	7.05e-06	3.29e-05	0.0047972	0.00672711	3.30558e-05	4.41788e-05
1.7	2.5	-2	0.000920195	0.0222541	6.66e-06	3.34e-05	0.00487305	0.00680138	3.35783e-05	4.38779e-05
1.8	2.5	-2	0.00090465	0.0225441	6.27e-06	3.38e-05	0.00494948	0.00687011	3.40451e-05	4.36066e-05
1.9	2.5	-2	0.00088982	0.022823	5.88e-06	3.43e-05	0.00502699	0.00693494	3.44703e-05	4.33499e-05
2	2.5	-2	0.000876285	0.0230887	5.49e-06	3.46e-05	0.00510474	0.00699545	3.48517e-05	4.31229e-05
1.2	2.5	-1	0.00107756	0.0196459	8.75e-06	2.78e-05	0.00446064	0.00610156	2.79684e-05	4.70245e-05
1.3	2.5	-1	0.00105039	0.0201426	8.39e-06	2.89e-05	0.00453187	0.0062381	2.90599e-05	4.64333e-05
1.4	2.5	-1	0.00102277	0.0205976	8.01e-06	2.98e-05	0.00460686	0.00636018	3.00196e-05	4.58695e-05
1.5	2.5	-1	0.000998874	0.0210013	7.63e-06	3.06e-05	0.00468181	0.00646586	3.08322e-05	4.53964e-05
1.6	2.5	-1	0.000978081	0.0213653	7.25e-06	3.13e-05	0.00475664	0.0065589	3.15291e-05	4.49971e-05
1.7	2.5	-1	0.000959121	0.0217018	6.87e-06	3.19e-05	0.00483212	0.00664295	3.21407e-05	4.46435e-05
1.8	2.5	-1	0.000943385	0.0220095	6.49e-06	3.25e-05	0.00490635	0.00671814	3.26715e-05	4.43531e-05
1.9	2.5	-1	0.000928175	0.0223033	6.11e-06	3.3e-05	0.00498192	0.00678847	3.31521e-05	4.40796e-05
2	2.5	-1	0.000914091	0.0225832	5.73e-06	3.34e-05	0.00505797	0.00685415	3.35864e-05	4.38298e-05
1.2	2.5	0	0.00112771	0.0187423	8.94e-06	2.55e-05	0.00442341	0.00582962	2.56109e-05	4.83085e-05
1.3	2.5	0	0.00109854	0.0193371	8.59e-06	2.68e-05	0.00449316	0.00599787	2.69522e-05	4.75905e-05
1.4	2.5	0	0.00106859	0.0198709	8.21e-06	2.8e-05	0.00456718	0.00614536	2.81191e-05	4.69111e-05
1.5	2.5	0	0.00104461	0.0203198	7.85e-06	2.89e-05	0.00463937	0.0062664	2.90619e-05	4.63881e-05
1.6	2.5	0	0.00102082	0.020734	7.47e-06	2.97e-05	0.00471435	0.00637552	2.98956e-05	4.58985e-05
1.7	2.5	0	0.00100354	0.021088	7.11e-06	3.04e-05	0.00478542	0.00646662	3.05752e-05	4.55473e-05
1.8	2.5	0	0.00098262	0.0214438	6.71e-06	3.1e-05	0.00486267	0.00655631	3.12289e-05	4.51436e-05
1.9	2.5	0	0.000967202	0.0217555	6.34e-06	3.16e-05	0.00493605	0.00663315	3.17722e-05	4.48508e-05
2	2.5	0	0.000950621	0.0220626	5.95e-06	3.21e-05	0.00501277	0.00670743	3.22833e-05	4.45428e-05
1.2	2.5	1	0.00118065	0.0176312	9.14e-06	2.27e-05	0.00438412	0.00549269	2.28115e-05	4.98252e-05
1.3	2.5	1	0.00114473	0.0184019	8.77e-06	2.44e-05	0.00445602	0.00571627	2.45573e-05	4.88707e-05
1.4	2.5	1	0.00111511	0.0190288	8.41e-06	2.58e-05	0.0045269	0.00589431	2.5956e-05	4.81069e-05
1.5	2.5	1	0.00108849	0.0195652	8.05e-06	2.7e-05	0.00459866	0.00604335	2.71219e-05	4.74578e-05
1.6	2.5	1	0.00106435	0.0200348	7.68e-06	2.79e-05	0.00467127	0.00617084	2.81074e-05	4.69008e-05
1.7	2.5	1	0.00104107	0.0204625	7.31e-06	2.88e-05	0.00474595	0.00628433	2.89704e-05	4.63933e-05
1.8	2.5	1	0.00102202	0.0208375	6.94e-06	2.95e-05	0.0048188	0.00638163	2.96945e-05	4.59891e-05
1.9	2.5	1	0.0010039	0.0211867	6.56e-06	3.02e-05	0.00489292	0.00647027	3.03386e-05	4.56221e-05
2	2.5	1	0.000987372	0.0215118	6.18e-06	3.07e-05	0.00496731	0.00655113	3.09117e-05	4.52964e-05
1.2	2.5	2	0.00123323	0.0163454	9.34e-06	1.96e-05	0.0043451	0.00510018	1.97326e-05	5.14049e-05
1.3	2.5	2	0.00119139	0.0173053	8.96e-06	2.17e-05	0.0044185	0.0053837	2.18518e-05	5.02729e-05
1.4	2.5	2	0.00115738	0.0180754	8.6e-06	2.34e-05	0.00449029	0.00560716	2.35608e-05	4.93534e-05
1.5	2.5	2	0.00112827	0.0187198	8.24e-06	2.48e-05	0.00456175	0.00579062	2.49778e-05	4.85806e-05
1.6	2.5	2	0.00110128	0.0192851	7.87e-06	2.6e-05	0.00463472	0.00594839	2.61972e-05	4.78922e-05
1.7	2.5	2	0.00107989	0.0197543	7.51e-06	2.7e-05	0.00470512	0.00607644	2.71774e-05	4.7364e-05
1.8	2.5	2	0.00105751	0.0201961	7.14e-06	2.79e-05	0.00477929	0.00619457	2.80709e-05	4.68445e-05
1.9	2.5	2	0.00104089	0.0205672	6.78e-06	2.86e-05	0.00484945	0.00629146	2.87882e-05	4.64684e-05
2	2.5	2	0.00102319	0.0209261	6.41e-06	2.93e-05	0.004923	0.00638342	2.94565e-05	4.60883e-05
1.2	2.5	3	0.00129915	0.0144202	9.58e-06	1.54e-05	0.00429617	0.00458161	1.54831e-05	5.36012e-05
1.3	2.5	3	0.00125019	0.0158805	9.2e-06	1.84e-05	0.00437121	0.00494987	1.85457e-05	5.20277e-05
1.4	2.5	3	0.00120769	0.0169012	8.82e-06	2.06e-05	0.00444672	0.00525205	2.07468e-05	5.08476e-05
1.5	2.5	3	0.00117363	0.0176901	8.45e-06	2.23e-05	0.00451967	0.00548124	2.24591e-05	4.99275e-05
1.6	2.5	3	0.00114182	0.0183846	8.07e-06	2.38e-05	0.00459459	0.00567959	2.39632e-05	4.90811e-05
1.7	2.5	3	0.00111981	0.0189252	7.72e-06	2.5e-05	0.00466315	0.00583092	2.51132e-05	4.84844e-05
1.8	2.5	3	0.00109676	0.0194328	7.36e-06	2.6e-05	0.00473559	0.00597048	2.61715e-05	4.78931e-05
1.9	2.5	3	0.00107666	0.0198792	6.99e-06	2.69e-05	0.0048074	0.00609079	2.70751e-05	4.73919e-05
2	2.5	3	0.00105786	0.0202855	6.63e-06	2.77e-05	0.00488011	0.00619806	2.78691e-05	4.69444e-05
1.4	2.5	4	0.00126172	0.0153949	9.06e-06	1.72e-05	0.00439994	0.00479294	1.73464e-05	5.25924e-05
1.5	2.5	4	0.00121966	0.0165163	8.67e-06	1.96e-05	0.00447695	0.00512625	1.97147e-05	5.13341e-05
1.6	2.5	4	0.001185	0.0173435	8.29e-06	2.13e-05	0.00455186	0.005367	2.14747e-05	5.03842e-05
1.7	2.5	4	0.00115903	0.0179901	7.93e-06	2.27e-05	0.0046219	0.00555174	2.28443e-05	4.96719e-05
1.8	2.5	4	0.00113466	0.0185708	7.57e-06	2.39e-05	0.00469339	0.00571499	2.40638e-05	4.90141e-05
1.9	2.5	4	0.00111133	0.0191032	7.2e-06	2.5e-05	0.00476666	0.00586221	2.51659e-05	4.83976e-05
2	2.5	4	0.00109147	0.0195673	6.84e-06	2.59e-05	0.00483853	0.00598811	2.61026e-05	4.78817e-05
1.5	2.5	5	0.00127422	0.0147548	8.92e-06	1.58e-05	0.00442633	0.00479855	1.58649e-05	5.32941e-05
1.6	2.5	5	0.00123672	0.0159817	8.55e-06	1.83e-05	0.00450067	0.00495562	1.83875e-05	5.20095e-05
1.7	2.5	5	0.0012022	0.0168949	8.16e-06	2.02e-05	0.00457652	0.00522308	2.02965e-05	5.09932e-05
1.8	2.5	5	0.0011716	0.0176274	7.78e-06	2.17e-05	0.00465225	0.00543337	2.18253e-05	5.01567e-05
1.9	2.5	5	0.00114949	0.018198	7.43e-06	2.29e-05	0.00472181	0.00559411	2.30022e-05	4.95481e-05
2	2.5	5	0.00112639	0.0187452	7.06e-06	2.4e-05	0.00479533	0.00574602	2.41208e-05	4.89284e-05
1.7	2.5	6	0.0012489	0.0153945	8.41e-06	1.69e-05	0.0045274	0.00496701	1.69868e-05	5.26626e-05
1.8	2.5	6	0.00121507	0.0164356	8.02e-06	1.9e-05	0.00460386	0.00509443	1.91229e-05	5.1547e-05
1.9	2.5	6	0.00118925	0.0171688	7.66e-06	2.05e-05	0.00467508	0.00528732	2.06284e-05	5.07767e-05
2	2.5	6	0.00116208	0.0178325	7.28e-06	2.19e-05	0.00475117	0.00547554	2.19837e-05	5.00318e-05
1.9	2.5	7	0.00123271	0.0157637	7.92e-06	1.74e-05	0.00462401	0.00512802	1.75341e-05	5.23418e-05
2	2.5	7	0.00120199	0.0167024	7.53e-06	1.93e-05	0.00470181	0.00525768	1.9439e-05	5.13351e-05

## Sheet: （15，30.3）
																					whole potentials of the equilibrium droplet		the unit length energy barrier
0	0	0	0.001934	0	1.18e-05	1.18e-05	0.003868	0.003868	0	4.70027e-05		(0,0,0)	-2.951	23.34	-2.293	-0.7854	-18570	36.79	91.33		3.189e-06		5.6e-06
0.2	0	0	0.00175599	0.00355963	1.17e-05	1.18e-05	0.00388058	0.00388897	1.01419e-06	4.59222e-05		(1,0,0)	3.867	-19.27	4.373	4.489	51700	6.908	-48.8
0.4	0	0	0.00165889	0.00499877	1.15e-05	1.19e-05	0.00391744	0.0039504	1.98739e-06	4.48953e-05		(0,1,0)	3.67	1.034	3.469	2.9	1.177	-1.607	-2.007
0.6	0	0	0.00156178	0.00609251	1.12e-05	1.21e-05	0.00397857	0.00405229	2.9215e-06	4.39009e-05		(0,0,1)	-1.096	3.614	-1.038	-0.9497	497.2	13.94	0.543
0.75	0	0	0.0015164	0.00625147	1.09e-05	1.22e-05	0.00402749	0.00413382	3.05041e-06	4.27791e-05		(2,0,0)	2.236	-11.21	2.037	2.075	-52290	-10.68	-44.91
0.8	0	0	0.00142005	0.00916912	1.06e-05	1.24e-05	0.0040863	0.00423182	6.49707e-06	4.12466e-05		(1,1,0)	5.83	5.969	5.969	6.022	3025	1.748	2.346
0.85	0	0	0.00134949	0.010924	1.04e-05	1.26e-05	0.00413743	0.00431704	9.14284e-06	4.03175e-05		(1,0,1)	1.826	-8.335	1.758	1.584	-1073	-31.26	-1.621
0.9	0	0	0.00129404	0.0121615	1.01e-05	1.27e-05	0.00418446	0.00439543	1.12423e-05	3.97122e-05		(0,2,0)	3.527	0.9791	3.335	2.788	363.1	-1.011	-1.897
1	0	0	0.00122871	0.0136738	9.76e-06	1.39e-05	0.00426046	0.0045221	1.40326e-05	3.98878e-05		(0,1,1)	0.9529	0.952	0.9524	0.9531	152.8	0.9506	0.952
1.1	0	0	0.00117125	0.0148424	9.36e-06	1.62e-05	0.0043392	0.00465334	1.63186e-05	4.00643e-05		(0,0,2)	0.03165	-0.02487	0.03532	0.03699	-3.241	-0.103	0.00298
1.2	0	0	0.00112455	0.0157909	8.97e-06	1.81e-05	0.00441707	0.00491286	1.82351e-05	4.03279e-05		(3,0,0)	-0.3438	26.46	-0.7753	-0.7378	22970	-16.59	59.67
1.3	0	0	0.00108993	0.0165867	8.6e-06	1.97e-05	0.00449095	0.00514521	1.9877e-05	4.07735e-05		(2,1,0)	2.774	4.671	3.093	3.03	-1559	13.56	3.592
1.5	0	0	0.001033	0.0179138	7.84e-06	2.24e-05	0.00464016	0.00552427	2.26293e-05	4.16866e-05		(2,0,1)	-0.8144	6.157	-0.8147	-0.7257	761.4	22.91	1.59
1.7	0	0	0.00098758	0.0190164	7.08e-06	2.47e-05	0.00479138	0.00583004	2.48888e-05	4.25719e-05		(1,2,0)	1.706	0.8683	1.741	1.721	-195.9	-1.479	0.6332
1.2	0	-5	0.000877481	0.0222479	8.03e-06	3.48e-05	0.00460237	0.00687099	3.5118e-05	4.32183e-05		(1,1,1)	3.754	3.452	4.134	4.087	472.1	3.525	1.295
1.3	0	-5	0.000855403	0.0225758	7.63e-06	3.54e-05	0.0046815	0.00695071	3.57012e-05	4.28527e-05		(1,0,2)	-0.04389	0.03239	-0.04955	-0.05277	4.549	0.143	-0.005258
1.4	0	-5	0.000838387	0.0228765	7.24e-06	3.59e-05	0.00475897	0.00702219	3.62054e-05	4.25803e-05		(0,3,0)	2.814	0.915	2.663	2.227	732.3	-0.6622	-1.549
1.5	0	-5	0.000819953	0.0231693	6.83e-06	3.64e-05	0.00483989	0.00709005	3.6662e-05	4.2292e-05		(0,2,1)	0.7631	0.7605	0.7616	0.7651	760.2	0.7543	0.76
1.6	0	-5	0.00080482	0.023446	6.43e-06	3.68e-05	0.00491982	0.00715295	3.70699e-05	4.20624e-05		(0,1,2)	0.7525	0.7762	0.7783	0.7619	0.7776	0.7655	0.7687
1.7	0	-5	0.000791107	0.0237108	6.02e-06	3.71e-05	0.00500013	0.00721194	3.74356e-05	4.18637e-05		(0,0,3)	-0.0001924	9.216e-05	-0.0002203	-0.0002295	0.009097	0.0003636	-1.28e-05
1.8	0	-5	0.000779383	0.0239645	5.61e-06	3.75e-05	0.00507991	0.00726748	3.77663e-05	4.17007e-05		(4,0,0)	0.09797	-8.883	-0.3349	-0.4865	-3718	7.871	-15.29
1.9	0	-5	0.000763939	0.024224	5.18e-06	3.78e-05	0.00516558	0.00732299	3.80779e-05	4.14794e-05		(3,1,0)	0.2307	-18.62	0.01446	-0.1531	-1303	-69.02	-16.83
2	0	-5	0.000753338	0.0244657	4.77e-06	3.81e-05	0.00524713	0.00737406	3.83551e-05	4.13413e-05		(3,0,1)	0.0491	-1.487	0.05922	0.04697	-177.3	-5.425	-0.5111
1.2	0	-4	0.000928047	0.0216384	8.22e-06	3.32e-05	0.00456444	0.00669273	3.34253e-05	4.41663e-05		(2,2,0)	-1.032	13.17	-0.7664	-0.5464	1311	49.14	12.2
1.3	0	-4	0.000905164	0.021994	7.84e-06	3.38e-05	0.00464107	0.00678226	3.41065e-05	4.37581e-05		(2,1,1)	0.1351	-0.2228	0.1345	0.1463	-19.31	-0.7443	-0.1579
1.4	0	-4	0.000884212	0.0223238	7.44e-06	3.44e-05	0.00471887	0.00686315	3.46994e-05	4.33915e-05		(2,0,2)	0.01489	-0.008864	0.0171	0.01869	-1.539	-0.04711	0.002388
1.5	0	-4	0.000868822	0.0226203	7.06e-06	3.49e-05	0.00479408	0.00693417	3.52009e-05	4.31325e-05		(1,3,0)	-0.3933	-3.934	-0.5354	-0.6032	-334.9	-12.63	-3.496
1.6	0	-4	0.000851464	0.0229122	6.66e-06	3.54e-05	0.00487318	0.00700249	3.56637e-05	4.28443e-05		(1,2,1)	-0.8232	-0.5781	-0.8975	-0.8934	-84.5	-0.3317	-0.177
1.7	0	-4	0.000837636	0.0231847	6.27e-06	3.58e-05	0.00495069	0.00706502	3.60722e-05	4.26216e-05		(1,1,2)	0.001568	-0.001036	0.00164	0.001734	-0.1071	-0.003065	-0.0004926
1.8	0	-4	0.000823091	0.0234522	5.86e-06	3.62e-05	0.00503074	0.00712514	3.64481e-05	4.23921e-05		(1,0,3)	0.0001393	-6.098e-05	0.0001589	0.0001671	-0.006391	-0.0002439	1.114e-05
1.9	0	-4	0.000812147	0.0237037	5.47e-06	3.65e-05	0.00510834	0.00718083	3.67854e-05	4.22259e-05		(0,4,0)	-0.7523	0.06024	-0.6977	-0.5771	-139.8	1.238	0.6761
2	0	-4	0.000800405	0.0239534	5.07e-06	3.68e-05	0.00518829	0.00723514	3.7101e-05	4.20492e-05		(0,3,1)	-0.1812	-0.2042	-0.1813	-0.1815	-159.4	-0.2351	-0.2006
1.2	0	-3	0.000975377	0.0209953	8.4e-06	3.14e-05	0.00452895	0.00650293	3.16503e-05	4.5119e-05		(0,2,2)	-0.1509	-0.155	-0.1561	-0.1528	-0.129	-0.1524	-0.1536
1.3	0	-3	0.000951701	0.0213889	8.03e-06	3.22e-05	0.00460326	0.00660547	3.24539e-05	4.46682e-05		(0,1,3)	4.705e-06	-1.648e-06	4.953e-06	5.102e-06	-0.0001702	-4.174e-06	-8.456e-07
1.4	0	-3	0.000929482	0.0217504	7.64e-06	3.29e-05	0.00467926	0.00669716	3.31503e-05	4.42565e-05		(0,0,4)	3.351e-07	-1.396e-07	3.949e-07	4.071e-07	-9.741e-06	-5.52e-07	1.274e-08
1.5	0	-3	0.000910015	0.0220805	7.26e-06	3.35e-05	0.00475546	0.00677877	3.37487e-05	4.39061e-05
1.6	0	-3	0.000892866	0.0223873	6.87e-06	3.4e-05	0.00483177	0.00685286	3.4273e-05	4.36028e-05
1.7	0	-3	0.000878853	0.022671	6.49e-06	3.45e-05	0.0049069	0.00691992	3.47308e-05	4.33602e-05
1.8	0	-3	0.000864097	0.0229482	6.1e-06	3.49e-05	0.00498461	0.00698403	3.51517e-05	4.3111e-05
1.9	0	-3	0.000852523	0.0232071	5.71e-06	3.52e-05	0.00506039	0.00704289	3.5525e-05	4.29195e-05
2	0	-3	0.000840108	0.0234637	5.32e-06	3.56e-05	0.00513867	0.00710018	3.58747e-05	4.27165e-05
1.2	0	-2	0.00102669	0.020278	8.6e-06	2.95e-05	0.00449046	0.00629038	2.97108e-05	4.62019e-05
1.3	0	-2	0.000999826	0.0207289	8.23e-06	3.04e-05	0.00456416	0.0064115	3.0676e-05	4.56579e-05
1.4	0	-2	0.000976477	0.0211294	7.85e-06	3.12e-05	0.00463814	0.00651641	3.14928e-05	4.51991e-05
1.5	0	-2	0.000955516	0.021493	7.47e-06	3.19e-05	0.0047128	0.00660929	3.21961e-05	4.48002e-05
1.6	0	-2	0.000936463	0.021829	7.09e-06	3.26e-05	0.00478818	0.00669313	3.28122e-05	4.4445e-05
1.7	0	-2	0.00091805	0.0221475	6.7e-06	3.31e-05	0.00486525	0.00677082	3.33648e-05	4.41081e-05
1.8	0	-2	0.000903054	0.0224385	6.32e-06	3.36e-05	0.00494078	0.00684017	3.38403e-05	4.38415e-05
1.9	0	-2	0.000888732	0.022718	5.93e-06	3.4e-05	0.00501739	0.00690549	3.42731e-05	4.35898e-05
2	0	-2	0.000875666	0.0229849	5.54e-06	3.44e-05	0.00509422	0.0069667	3.46643e-05	4.3364e-05
1.2	0	-1	0.00107684	0.0194861	8.79e-06	2.74e-05	0.00445285	0.0060538	2.76051e-05	4.73651e-05
1.3	0	-1	0.00104519	0.0200239	8.41e-06	2.86e-05	0.0045273	0.00620248	2.87971e-05	4.66667e-05
1.4	0	-1	0.00102109	0.0204692	8.05e-06	2.95e-05	0.00459911	0.00632246	2.97429e-05	4.61544e-05
1.5	0	-1	0.000997926	0.0208775	7.67e-06	3.03e-05	0.00467304	0.00642994	3.05735e-05	4.56818e-05
1.6	0	-1	0.000977942	0.0212437	7.3e-06	3.1e-05	0.0047467	0.00652407	3.1283e-05	4.52884e-05
1.7	0	-1	0.000959574	0.0215835	6.92e-06	3.17e-05	0.00482113	0.00660949	3.19101e-05	4.49348e-05
1.8	0	-1	0.000940331	0.0219123	6.53e-06	3.22e-05	0.00489885	0.00669037	3.24864e-05	4.45755e-05
1.9	0	-1	0.00092557	0.0222078	6.15e-06	3.27e-05	0.00497365	0.00676149	3.29769e-05	4.43031e-05
2	0	-1	0.000909855	0.0224982	5.76e-06	3.32e-05	0.00505148	0.00683002	3.34344e-05	4.40196e-05
1.2	0	1	0.00117498	0.0174664	9.16e-06	2.23e-05	0.00437925	0.00544243	2.24497e-05	5.01266e-05
1.3	0	1	0.00113989	0.0182497	8.8e-06	2.4e-05	0.00445036	0.00567026	2.42231e-05	4.91725e-05
1.4	0	1	0.00110605	0.0189306	8.43e-06	2.55e-05	0.00452477	0.00586442	2.57491e-05	4.8296e-05
1.5	0	1	0.00108001	0.0194741	8.06e-06	2.67e-05	0.00459609	0.0060158	2.69344e-05	4.76434e-05
1.6	0	1	0.0010564	0.0199492	7.7e-06	2.77e-05	0.00466824	0.0061452	2.79368e-05	4.70827e-05
1.7	0	1	0.00103617	0.0203636	7.34e-06	2.85e-05	0.00473975	0.00625547	2.87768e-05	4.66246e-05
1.8	0	1	0.001015	0.0207588	6.96e-06	2.93e-05	0.00481485	0.00635847	2.95476e-05	4.61688e-05
1.9	0	1	0.000997271	0.0211106	6.58e-06	3e-05	0.0048885	0.00644811	3.02021e-05	4.57998e-05
2	0	1	0.000983735	0.0214217	6.23e-06	3.05e-05	0.00495913	0.00652571	3.07539e-05	4.55221e-05
1.2	0	2	0.0012298	0.0161276	9.37e-06	1.91e-05	0.00433813	0.00503362	1.92704e-05	5.17806e-05
1.3	0	2	0.00118889	0.0171084	9e-06	2.13e-05	0.00441055	0.00532415	2.14279e-05	5.06472e-05
1.4	0	2	0.00115316	0.0179166	8.63e-06	2.3e-05	0.00448355	0.00555938	2.32202e-05	4.96728e-05
1.5	0	2	0.00111991	0.0186165	8.25e-06	2.46e-05	0.00455868	0.00575936	2.47643e-05	4.87918e-05
1.6	0	2	0.0010983	0.0191455	7.91e-06	2.57e-05	0.00462634	0.00590728	2.59058e-05	4.82078e-05
1.7	0	2	0.00107496	0.0196433	7.55e-06	2.67e-05	0.00469854	0.00604384	2.69547e-05	4.76211e-05
1.8	0	2	0.00105305	0.020091	7.17e-06	2.76e-05	0.00477204	0.00616404	2.7867e-05	4.70975e-05
1.9	0	2	0.00103431	0.0204849	6.81e-06	2.84e-05	0.00484451	0.00626749	2.86377e-05	4.66663e-05
2	0	2	0.00101698	0.0208468	6.44e-06	2.91e-05	0.00491758	0.00636054	2.9317e-05	4.62839e-05
1.2	0	3	0.00129512	0.0140705	9.62e-06	1.47e-05	0.00428914	0.0045699	1.47879e-05	5.40801e-05
1.3	0	3	0.00124189	0.0157139	9.22e-06	1.81e-05	0.00436748	0.00489869	1.8206e-05	5.23009e-05
1.4	0	3	0.00120018	0.0167606	8.84e-06	2.03e-05	0.0044424	0.00520926	2.04582e-05	5.11072e-05
1.5	0	3	0.00116677	0.0175589	8.48e-06	2.2e-05	0.00451475	0.00544163	2.21888e-05	5.01881e-05
1.6	0	3	0.00113393	0.0182775	8.09e-06	2.36e-05	0.00459071	0.00564735	2.37468e-05	4.93053e-05
1.7	0	3	0.00111234	0.0188234	7.75e-06	2.47e-05	0.00465882	0.00580052	2.49104e-05	4.87071e-05
1.8	0	3	0.00108973	0.0193359	7.38e-06	2.58e-05	0.00473077	0.00594184	2.59829e-05	4.81148e-05
1.9	0	3	0.00107003	0.0197871	7.02e-06	2.67e-05	0.0048021	0.0060638	2.69008e-05	4.76108e-05
2	0	3	0.00104917	0.0202181	6.64e-06	2.75e-05	0.00487734	0.00617812	2.77514e-05	4.71077e-05
1.4	0	4	0.00125384	0.015198	9.08e-06	1.68e-05	0.00439545	0.00474708	1.69517e-05	5.29023e-05
1.5	0	4	0.00121253	0.0163637	8.69e-06	1.93e-05	0.00447185	0.0050799	1.94066e-05	5.16118e-05
1.6	0	4	0.00117848	0.0172074	8.32e-06	2.1e-05	0.00454616	0.00532608	2.12007e-05	5.06551e-05
1.7	0	4	0.00115034	0.0178915	7.95e-06	2.25e-05	0.00461845	0.00552208	2.26524e-05	4.98795e-05
1.8	0	4	0.00112747	0.0184639	7.6e-06	2.37e-05	0.00468832	0.00568321	2.38543e-05	4.92494e-05
1.9	0	4	0.00110455	0.0190008	7.23e-06	2.48e-05	0.0047611	0.00583202	2.49684e-05	4.86325e-05
2	0	4	0.00108506	0.0194695	6.87e-06	2.57e-05	0.00483248	0.00595955	2.59185e-05	4.81135e-05
1.6	0	5	0.00122975	0.0158	8.58e-06	1.79e-05	0.00449489	0.00491281	1.80247e-05	5.23185e-05
1.7	0	5	0.00119582	0.0167455	8.2e-06	1.98e-05	0.00457012	0.00517819	1.99994e-05	5.12798e-05
1.8	0	5	0.00116575	0.0174925	7.82e-06	2.14e-05	0.00464525	0.00539326	2.15596e-05	5.04359e-05
1.9	0	5	0.0011388	0.0181308	7.43e-06	2.27e-05	0.00472044	0.00557373	2.28829e-05	4.9703e-05
2	0	5	0.00111976	0.0186382	7.09e-06	2.37e-05	0.0047891	0.00571457	2.39172e-05	4.91716e-05
1.7	0	6	0.00124209	0.015175	8.44e-06	1.64e-05	0.00452096	0.00495626	1.65561e-05	5.30085e-05
1.8	0	6	0.00120881	0.0162612	8.06e-06	1.86e-05	0.0045968	0.00508267	1.87779e-05	5.18612e-05
1.9	0	6	0.00117836	0.0170923	7.67e-06	2.03e-05	0.00467346	0.00526409	2.0491e-05	5.09429e-05
2	0	6	0.00115671	0.0176968	7.32e-06	2.15e-05	0.00474291	0.00543558	2.1722e-05	5.03176e-05
1.9	0	7	0.00122644	0.0155483	7.96e-06	1.7e-05	0.00461636	0.00511527	1.71132e-05	5.26925e-05
2	0	7	0.0011962	0.0165278	7.57e-06	1.89e-05	0.00469355	0.00524391	1.90979e-05	5.16546e-05
1.2	0.5	-5	0.000867125	0.022357	7.99e-06	3.51e-05	0.00461014	0.00690258	3.54187e-05	4.30355e-05
1.3	0.5	-5	0.000846829	0.0226774	7.6e-06	3.57e-05	0.00468847	0.00698011	3.59831e-05	4.27046e-05
1.4	0.5	-5	0.000829196	0.0229777	7.2e-06	3.62e-05	0.00476701	0.00705108	3.64796e-05	4.24262e-05
1.5	0.5	-5	0.000812778	0.0232633	6.8e-06	3.66e-05	0.00484662	0.00711697	3.69203e-05	4.2177e-05
1.6	0.5	-5	0.000797145	0.0235394	6.39e-06	3.7e-05	0.00492749	0.00717937	3.73206e-05	4.19445e-05
1.7	0.5	-5	0.000782976	0.0238045	5.97e-06	3.74e-05	0.00500877	0.00723809	3.76808e-05	4.17416e-05
1.8	0.5	-5	0.000769473	0.0240615	5.56e-06	3.77e-05	0.00509106	0.00729386	3.80063e-05	4.15537e-05
1.9	0.5	-5	0.000756084	0.0243138	5.13e-06	3.8e-05	0.00517491	0.00734762	3.83053e-05	4.1371e-05
2	0.5	-5	0.000745133	0.024556	4.72e-06	3.83e-05	0.00525738	0.00739851	3.85778e-05	4.12295e-05
1.2	0.5	-4	0.000920627	0.0217296	8.2e-06	3.34e-05	0.00457001	0.00671946	3.36771e-05	4.40239e-05
1.3	0.5	-4	0.00089717	0.0220832	7.8e-06	3.41e-05	0.00464757	0.00680805	3.43478e-05	4.36077e-05
1.4	0.5	-4	0.00087808	0.0224034	7.42e-06	3.46e-05	0.00472424	0.00688621	3.49174e-05	4.32786e-05
1.5	0.5	-4	0.000862288	0.0226992	7.03e-06	3.51e-05	0.00480021	0.00695673	3.54124e-05	4.30155e-05
1.6	0.5	-4	0.000846967	0.0229837	6.64e-06	3.56e-05	0.00487767	0.00702313	3.5861e-05	4.27635e-05
1.7	0.5	-4	0.00083036	0.023263	6.23e-06	3.6e-05	0.00495842	0.00708681	3.6272e-05	4.24975e-05
1.8	0.5	-4	0.000817955	0.0235236	5.83e-06	3.63e-05	0.00503652	0.00714528	3.66371e-05	4.23056e-05
1.9	0.5	-4	0.000804241	0.023783	5.42e-06	3.67e-05	0.00511772	0.00720234	3.69778e-05	4.20953e-05
2	0.5	-4	0.000792218	0.0240325	5.01e-06	3.7e-05	0.00519853	0.00725634	3.72875e-05	4.19178e-05
1.2	0.5	-3	0.000971104	0.021071	8.39e-06	3.16e-05	0.00453215	0.00652556	3.18624e-05	4.50268e-05
1.3	0.5	-3	0.000947012	0.0214617	8.01e-06	3.24e-05	0.00460707	0.00662696	3.2655e-05	4.45724e-05
1.4	0.5	-3	0.000924415	0.0218208	7.62e-06	3.31e-05	0.0046837	0.00671769	3.33416e-05	4.41572e-05
1.5	0.5	-3	0.000904603	0.0221496	7.23e-06	3.37e-05	0.00476053	0.00679866	3.39328e-05	4.38023e-05
1.6	0.5	-3	0.000889405	0.0224472	6.85e-06	3.42e-05	0.00483524	0.00687028	3.44376e-05	4.35351e-05
1.7	0.5	-3	0.000872874	0.0227388	6.46e-06	3.46e-05	0.00491325	0.00693893	3.49036e-05	4.32492e-05
1.8	0.5	-3	0.000860152	0.0230075	6.07e-06	3.5e-05	0.00498905	0.00700092	3.5309e-05	4.30368e-05
1.9	0.5	-3	0.000846055	0.0232738	5.67e-06	3.54e-05	0.00506807	0.00706111	3.56866e-05	4.28053e-05
2	0.5	-3	0.000833418	0.0235303	5.27e-06	3.57e-05	0.00514703	0.00711814	3.60319e-05	4.26009e-05
1.2	0.5	-2	0.00102226	0.0203524	8.58e-06	2.97e-05	0.00449378	0.00631262	2.99129e-05	4.61031e-05
1.3	0.5	-2	0.000994355	0.020804	8.2e-06	3.06e-05	0.00456861	0.0064336	3.08764e-05	4.55421e-05
1.4	0.5	-2	0.000970678	0.0212014	7.83e-06	3.14e-05	0.00464322	0.00653731	3.16817e-05	4.50829e-05
1.5	0.5	-2	0.000949413	0.0215637	7.44e-06	3.21e-05	0.00471853	0.00662957	3.23787e-05	4.46787e-05
1.6	0.5	-2	0.000930088	0.0218977	7.06e-06	3.27e-05	0.00479455	0.00671256	3.29856e-05	4.43225e-05
1.7	0.5	-2	0.000913549	0.0222057	6.68e-06	3.32e-05	0.00487003	0.00678738	3.3515e-05	4.40217e-05
1.8	0.5	-2	0.000898346	0.0224962	6.29e-06	3.37e-05	0.00494608	0.00685641	3.39863e-05	4.37521e-05
1.9	0.5	-2	0.000886003	0.0227664	5.91e-06	3.41e-05	0.00502063	0.00691938	3.44019e-05	4.35365e-05
2	0.5	-2	0.000870593	0.0230421	5.51e-06	3.45e-05	0.00510056	0.00698239	3.48026e-05	4.32698e-05
1.2	0.5	-1	0.00107187	0.019567	8.77e-06	2.76e-05	0.00445658	0.00607805	2.7818e-05	4.72448e-05
1.3	0.5	-1	0.00104259	0.0200838	8.4e-06	2.87e-05	0.00452941	0.0062205	2.89596e-05	4.65997e-05
1.4	0.5	-1	0.00101551	0.0205415	8.02e-06	2.97e-05	0.00460399	0.00634356	2.99294e-05	4.60352e-05
1.5	0.5	-1	0.000994854	0.0209324	7.66e-06	3.05e-05	0.00467593	0.00644614	3.07204e-05	4.56145e-05
1.6	0.5	-1	0.000971198	0.0213148	7.27e-06	3.12e-05	0.00475344	0.0065442	3.14588e-05	4.51553e-05
1.7	0.5	-1	0.000952608	0.0216531	6.89e-06	3.18e-05	0.00482853	0.00662895	3.20786e-05	4.48e-05
1.8	0.5	-1	0.000937191	0.0219612	6.51e-06	3.24e-05	0.00490238	0.0067044	3.26133e-05	4.4512e-05
1.9	0.5	-1	0.00092024	0.0222655	6.12e-06	3.29e-05	0.00497998	0.00677745	3.31156e-05	4.4202e-05
2	0.5	-1	0.000906419	0.0225458	5.74e-06	3.33e-05	0.00505578	0.00684336	3.35533e-05	4.39533e-05
1.2	0.5	0	0.00112177	0.0186505	8.96e-06	2.52e-05	0.00441915	0.00580204	2.54288e-05	4.85519e-05
1.3	0.5	0	0.00108806	0.0192907	8.59e-06	2.67e-05	0.00449247	0.00598364	2.68793e-05	4.77217e-05
1.4	0.5	0	0.0010612	0.0198104	8.23e-06	2.78e-05	0.00456401	0.00612743	2.80183e-05	4.70926e-05
1.5	0.5	0	0.00103767	0.0202622	7.86e-06	2.87e-05	0.00463579	0.00624953	2.89717e-05	4.65683e-05
1.6	0.5	0	0.0010143	0.0206794	7.49e-06	2.96e-05	0.00471034	0.00635972	2.98166e-05	4.60749e-05
1.7	0.5	0	0.000994658	0.0210494	7.11e-06	3.03e-05	0.00478386	0.00645516	3.05314e-05	4.56755e-05
1.8	0.5	0	0.000976812	0.0213916	6.74e-06	3.09e-05	0.00485781	0.00654158	3.1163e-05	4.53208e-05
1.9	0.5	0	0.000959265	0.0217172	6.36e-06	3.15e-05	0.00493363	0.00662208	3.17355e-05	4.49838e-05
2	0.5	0	0.000944918	0.0220147	5.98e-06	3.2e-05	0.00500765	0.00669417	3.22333e-05	4.47109e-05
1.2	0.5	1	0.0011695	0.0175742	9.14e-06	2.25e-05	0.00438336	0.00547512	2.27123e-05	4.99727e-05
1.3	0.5	1	0.00113414	0.0183496	8.78e-06	2.43e-05	0.00445504	0.00570022	2.44701e-05	4.90164e-05
1.4	0.5	1	0.00110498	0.0189802	8.42e-06	2.57e-05	0.0045257	0.00587954	2.588e-05	4.82516e-05
1.5	0.5	1	0.00107879	0.0195202	8.06e-06	2.68e-05	0.00459723	0.00602976	2.70569e-05	4.75998e-05
1.6	0.5	1	0.00105503	0.0199923	7.69e-06	2.78e-05	0.00466961	0.00615814	2.80514e-05	4.70411e-05
1.7	0.5	1	0.00103469	0.0204053	7.33e-06	2.87e-05	0.00474133	0.0062679	2.88875e-05	4.65815e-05
1.8	0.5	1	0.00101338	0.0207985	6.95e-06	2.94e-05	0.00481667	0.0063702	2.96522e-05	4.6127e-05
1.9	0.5	1	0.000995551	0.021149	6.57e-06	3.01e-05	0.00489054	0.00645935	3.03024e-05	4.57584e-05
2	0.5	1	0.000979291	0.0214752	6.2e-06	3.06e-05	0.00496469	0.00654065	3.08807e-05	4.54312e-05
1.2	0.5	2	0.00122802	0.016203	9.36e-06	1.93e-05	0.00433947	0.00505688	1.94467e-05	5.17124e-05
1.3	0.5	2	0.0011814	0.0172382	8.97e-06	2.16e-05	0.00441663	0.00536324	2.17326e-05	5.04482e-05
1.4	0.5	2	0.00114708	0.0180212	8.61e-06	2.33e-05	0.00448887	0.00559066	2.34718e-05	4.95087e-05
1.5	0.5	2	0.00111841	0.0186688	8.25e-06	2.47e-05	0.00456009	0.00577522	2.4898e-05	4.87357e-05
1.6	0.5	2	0.00109182	0.0192374	7.88e-06	2.59e-05	0.00463282	0.00593413	2.61278e-05	4.80455e-05
1.7	0.5	2	0.00107322	0.0196892	7.54e-06	2.69e-05	0.00470038	0.00605752	2.70728e-05	4.75683e-05
1.8	0.5	2	0.0010512	0.0201344	7.16e-06	2.78e-05	0.00477412	0.00617686	2.79781e-05	4.70458e-05
1.9	0.5	2	0.00103236	0.0205264	6.79e-06	2.85e-05	0.00484683	0.00627961	2.87431e-05	4.66155e-05
2	0.5	2	0.00101493	0.0208868	6.42e-06	2.92e-05	0.00492013	0.00637212	2.94176e-05	4.62337e-05
1.2	0.5	3	0.00128798	0.0143055	9.59e-06	1.52e-05	0.00429449	0.00457882	1.52724e-05	5.38138e-05
1.3	0.5	3	0.00123973	0.0157985	9.21e-06	1.83e-05	0.00436924	0.0049247	1.83971e-05	5.22167e-05
1.4	0.5	3	0.00119784	0.0168314	8.83e-06	2.05e-05	0.00444445	0.00523083	2.06244e-05	5.10301e-05
1.5	0.5	3	0.00116427	0.0176248	8.46e-06	2.22e-05	0.00451709	0.00546156	2.23473e-05	5.01094e-05
1.6	0.5	3	0.00113211	0.0183316	8.08e-06	2.37e-05	0.00459253	0.00566366	2.38804e-05	4.9243e-05
1.7	0.5	3	0.00111042	0.0188745	7.74e-06	2.48e-05	0.00466086	0.00581582	2.50377e-05	4.86463e-05
1.8	0.5	3	0.00108771	0.0193847	7.37e-06	2.59e-05	0.00473305	0.00595631	2.61047e-05	4.80533e-05
1.9	0.5	3	0.00106791	0.0198334	7.01e-06	2.68e-05	0.00480462	0.0060774	2.7016e-05	4.75504e-05
2	0.5	3	0.00104696	0.020262	6.63e-06	2.76e-05	0.0048801	0.00619088	2.78598e-05	4.70489e-05
1.4	0.5	4	0.00125139	0.0152978	9.07e-06	1.7e-05	0.00439759	0.00476317	1.7169e-05	5.2801e-05
1.5	0.5	4	0.00120992	0.0164408	8.68e-06	1.94e-05	0.0044743	0.00510333	1.9582e-05	5.15256e-05
1.6	0.5	4	0.00117574	0.0172759	8.3e-06	2.12e-05	0.0045489	0.0053467	2.13602e-05	5.05715e-05
1.7	0.5	4	0.00115015	0.0179259	7.95e-06	2.26e-05	0.00461865	0.00553265	2.27388e-05	4.98575e-05
1.8	0.5	4	0.00112531	0.0185174	7.58e-06	2.38e-05	0.00469074	0.00569914	2.39833e-05	4.91832e-05
1.9	0.5	4	0.00110231	0.0190524	7.22e-06	2.49e-05	0.00476376	0.00584727	2.50936e-05	4.85646e-05
2	0.5	4	0.00108274	0.0195187	6.85e-06	2.58e-05	0.00483538	0.00597394	2.60376e-05	4.80466e-05
1.5	0.5	5	0.00126396	0.0146369	8.94e-06	1.55e-05	0.00442364	0.00479407	1.56503e-05	5.35228e-05
1.6	0.5	5	0.00122696	0.0158921	8.56e-06	1.81e-05	0.00449768	0.00492843	1.8227e-05	5.22165e-05
1.7	0.5	5	0.00119291	0.0168209	8.18e-06	2e-05	0.00457322	0.00520088	2.01699e-05	5.11885e-05
1.8	0.5	5	0.00116273	0.0175603	7.8e-06	2.15e-05	0.00464864	0.00541346	2.17152e-05	5.03476e-05
1.9	0.5	5	0.00113568	0.0181954	7.42e-06	2.28e-05	0.00472413	0.00559281	2.30327e-05	4.96138e-05
2	0.5	5	0.00111736	0.0186922	7.07e-06	2.39e-05	0.0047921	0.00573047	2.40445e-05	4.90993e-05
1.7	0.5	6	0.00123915	0.0152865	8.43e-06	1.67e-05	0.00452409	0.00496148	1.67918e-05	5.28872e-05
1.8	0.5	6	0.00120576	0.0163496	8.04e-06	1.88e-05	0.00460024	0.00508839	1.8972e-05	5.17557e-05
1.9	0.5	6	0.00117522	0.0171667	7.65e-06	2.05e-05	0.00467719	0.00528622	2.06572e-05	5.08477e-05
2	0.5	6	0.00115349	0.0177651	7.3e-06	2.17e-05	0.00474694	0.00545573	2.1876e-05	5.02254e-05
1.9	0.5	7	0.0012233	0.0156577	7.94e-06	1.72e-05	0.0046201	0.00512149	1.73444e-05	5.25686e-05
2	0.5	7	0.00119297	0.0166162	7.55e-06	1.91e-05	0.00469758	0.00525064	1.92902e-05	5.15463e-05
1.2	1	-5	0.000859994	0.0224343	7.97e-06	3.54e-05	0.00461548	0.00692497	3.56329e-05	4.29107e-05
1.3	1	-5	0.000839155	0.0227538	7.56e-06	3.59e-05	0.00469471	0.00700192	3.61895e-05	4.25749e-05
1.4	1	-5	0.000823683	0.023047	7.17e-06	3.64e-05	0.00477184	0.00707103	3.66716e-05	4.2337e-05
1.5	1	-5	0.000806851	0.0233326	6.77e-06	3.68e-05	0.00485218	0.00713666	3.71079e-05	4.20836e-05
1.6	1	-5	0.000790839	0.0236089	6.35e-06	3.72e-05	0.0049338	0.00719885	3.7504e-05	4.18473e-05
1.7	1	-5	0.000776324	0.0238733	5.94e-06	3.76e-05	0.00501584	0.00725711	3.78571e-05	4.16431e-05
1.8	1	-5	0.000762948	0.0241295	5.52e-06	3.79e-05	0.0050984	0.00731251	3.8178e-05	4.14595e-05
1.9	1	-5	0.000749251	0.024381	5.09e-06	3.82e-05	0.00518302	0.00736574	3.8469e-05	4.12763e-05
2	1	-5	0.000738034	0.0246225	4.67e-06	3.84e-05	0.00526626	0.00741616	3.8734e-05	4.11348e-05
1.2	1	-4	0.000914535	0.0217964	8.17e-06	3.36e-05	0.00457458	0.0067389	3.38593e-05	4.39089e-05
1.3	1	-4	0.000893016	0.0221408	7.79e-06	3.42e-05	0.00465095	0.00682492	3.45085e-05	4.35294e-05
1.4	1	-4	0.000873596	0.0224604	7.4e-06	3.48e-05	0.00472816	0.00690269	3.50733e-05	4.31957e-05
1.5	1	-4	0.00085751	0.0227558	7.01e-06	3.53e-05	0.00480468	0.00697287	3.55637e-05	4.29294e-05
1.6	1	-4	0.000841918	0.0230392	6.61e-06	3.57e-05	0.00488272	0.00703873	3.60055e-05	4.26774e-05
1.7	1	-4	0.000827524	0.0233115	6.21e-06	3.61e-05	0.00496144	0.00710077	3.6406e-05	4.24497e-05
1.8	1	-4	0.000812405	0.0235791	5.8e-06	3.65e-05	0.00504277	0.00716047	3.67742e-05	4.22151e-05
1.9	1	-4	0.000800994	0.0238311	5.4e-06	3.68e-05	0.00512158	0.00721587	3.71052e-05	4.20453e-05
2	1	-4	0.000788786	0.0240817	4.99e-06	3.71e-05	0.00520282	0.00727005	3.74155e-05	4.18639e-05
1.2	1	-3	0.000964263	0.0211396	8.36e-06	3.18e-05	0.00453728	0.00654547	3.20433e-05	4.4893e-05
1.3	1	-3	0.000941994	0.0215193	7.99e-06	3.25e-05	0.00461115	0.00664368	3.28088e-05	4.44744e-05
1.4	1	-3	0.000921315	0.0218688	7.61e-06	3.32e-05	0.00468641	0.00673174	3.34737e-05	4.40945e-05
1.5	1	-3	0.000901262	0.0221962	7.22e-06	3.38e-05	0.00476367	0.00681215	3.40587e-05	4.37378e-05
1.6	1	-3	0.000885867	0.0224931	6.84e-06	3.43e-05	0.00483877	0.0068834	3.45592e-05	4.34687e-05
1.7	1	-3	0.000869138	0.022784	6.44e-06	3.47e-05	0.00491722	0.00695168	3.50205e-05	4.31814e-05
1.8	1	-3	0.000856245	0.0230521	6.05e-06	3.51e-05	0.00499344	0.00701334	3.54216e-05	4.29685e-05
1.9	1	-3	0.000841979	0.0233189	5.65e-06	3.55e-05	0.00507291	0.00707353	3.5798e-05	4.27339e-05
2	1	-3	0.000831541	0.0235678	5.26e-06	3.58e-05	0.00514937	0.00712884	3.61334e-05	4.25666e-05
1.2	1	-2	0.00101858	0.0204074	8.57e-06	2.98e-05	0.00449655	0.00632898	3.00612e-05	4.60223e-05
1.3	1	-2	0.00099091	0.0208537	8.19e-06	3.08e-05	0.00457141	0.00644826	3.10099e-05	4.54708e-05
1.4	1	-2	0.000967006	0.0212501	7.81e-06	3.16e-05	0.00464643	0.0065515	3.18109e-05	4.50075e-05
1.5	1	-2	0.000945531	0.0216103	7.43e-06	3.22e-05	0.00472217	0.00664297	3.24998e-05	4.46035e-05
1.6	1	-2	0.000928136	0.0219349	7.05e-06	3.28e-05	0.0047965	0.00672345	3.30873e-05	4.42818e-05
1.7	1	-2	0.000911452	0.0222421	6.67e-06	3.33e-05	0.00487226	0.00679791	3.36129e-05	4.39798e-05
1.8	1	-2	0.000896112	0.0225327	6.28e-06	3.38e-05	0.00494859	0.00686686	3.4083e-05	4.3707e-05
1.9	1	-2	0.000881475	0.0228107	5.89e-06	3.42e-05	0.00502601	0.00693145	3.45069e-05	4.34534e-05
2	1	-2	0.000870315	0.0230683	5.51e-06	3.46e-05	0.00510091	0.00699024	3.48799e-05	4.3263e-05
1.2	1	-1	0.00107051	0.0196098	8.77e-06	2.77e-05	0.0044576	0.00609107	2.79349e-05	4.72028e-05
1.3	1	-1	0.00103832	0.0201398	8.38e-06	2.89e-05	0.00453289	0.00623698	2.91048e-05	4.65051e-05
1.4	1	-1	0.00101377	0.0205797	8.02e-06	2.98e-05	0.00460551	0.006355	3.00337e-05	4.59933e-05
1.5	1	-1	0.000990178	0.0209839	7.64e-06	3.06e-05	0.00468031	0.00646088	3.08497e-05	4.552e-05
1.6	1	-1	0.000970818	0.0213426	7.27e-06	3.13e-05	0.00475382	0.00655265	3.1539e-05	4.51416e-05
1.7	1	-1	0.000952117	0.0216803	6.88e-06	3.19e-05	0.00482905	0.00663713	3.21564e-05	4.47851e-05
1.8	1	-1	0.000934572	0.0219977	6.5e-06	3.24e-05	0.00490533	0.0067148	3.27067e-05	4.44588e-05
1.9	1	-1	0.000919553	0.0222919	6.12e-06	3.29e-05	0.00498079	0.00678528	3.31899e-05	4.41843e-05
2	1	-1	0.000905648	0.0225718	5.73e-06	3.34e-05	0.00505674	0.00685102	3.36258e-05	4.39348e-05
1.2	1	0	0.00111754	0.0187195	8.94e-06	2.54e-05	0.00442233	0.00582277	2.5604e-05	4.84419e-05
1.3	1	0	0.00108617	0.0193349	8.58e-06	2.68e-05	0.00449401	0.00599699	2.6996e-05	4.76677e-05
1.4	1	0	0.00105916	0.0198517	8.22e-06	2.79e-05	0.0045658	0.00613977	2.8127e-05	4.70394e-05
1.5	1	0	0.00103549	0.0203012	7.85e-06	2.88e-05	0.00463783	0.00626106	2.90738e-05	4.65162e-05
1.6	1	0	0.00101199	0.0207166	7.47e-06	2.97e-05	0.00471265	0.00637057	2.99128e-05	4.60242e-05
1.7	1	0	0.00099223	0.0210861	7.1e-06	3.04e-05	0.00478644	0.00646578	3.06254e-05	4.56221e-05
1.8	1	0	0.000974277	0.021427	6.72e-06	3.1e-05	0.00486066	0.00655168	3.12519e-05	4.52687e-05
1.9	1	0	0.000956307	0.0217537	6.34e-06	3.16e-05	0.00493715	0.00663233	3.18246e-05	4.49246e-05
2	1	0	0.000941869	0.0220503	5.96e-06	3.21e-05	0.00501146	0.00670403	3.23182e-05	4.46526e-05
1.2	1	1	0.00116755	0.0176294	9.13e-06	2.27e-05	0.00438482	0.00549198	2.28495e-05	4.99085e-05
1.3	1	1	0.00113203	0.0184002	8.77e-06	2.44e-05	0.00445675	0.00571555	2.45984e-05	4.89526e-05
1.4	1	1	0.00110274	0.0190271	8.41e-06	2.58e-05	0.00452767	0.00589361	2.59997e-05	4.81879e-05
1.5	1	1	0.00107641	0.0195636	8.05e-06	2.7e-05	0.00459946	0.00604265	2.71676e-05	4.7538e-05
1.6	1	1	0.00105254	0.0200332	7.68e-06	2.79e-05	0.0046721	0.00617014	2.8155e-05	4.69802e-05
1.7	1	1	0.00103209	0.0204441	7.31e-06	2.88e-05	0.00474409	0.00627913	2.89844e-05	4.65224e-05
1.8	1	1	0.00101068	0.0208361	6.93e-06	2.95e-05	0.00481971	0.00638096	2.97451e-05	4.60673e-05
1.9	1	1	0.000992759	0.0211852	6.56e-06	3.01e-05	0.00489386	0.00646961	3.03904e-05	4.56999e-05
2	1	1	0.000979057	0.021495	6.2e-06	3.07e-05	0.00496498	0.0065466	3.09362e-05	4.5422e-05
1.2	1	2	0.00122512	0.0162763	9.35e-06	1.95e-05	0.00434164	0.00507931	1.96161e-05	5.16233e-05
1.3	1	2	0.00117833	0.0173039	8.96e-06	2.17e-05	0.00441913	0.00538313	2.18894e-05	5.03595e-05
1.4	1	2	0.00114469	0.018074	8.6e-06	2.34e-05	0.00449095	0.00560659	2.36015e-05	4.94387e-05
1.5	1	2	0.0011159	0.0187185	8.23e-06	2.48e-05	0.00456244	0.00579005	2.50211e-05	4.8665e-05
1.6	1	2	0.00109406	0.0192414	7.89e-06	2.59e-05	0.00463057	0.00593588	2.6148e-05	4.80827e-05
1.7	1	2	0.00107051	0.0197333	7.52e-06	2.7e-05	0.00470326	0.00607042	2.71817e-05	4.74985e-05
1.8	1	2	0.00105088	0.020157	7.16e-06	2.78e-05	0.00477448	0.00618372	2.80394e-05	4.70301e-05
1.9	1	2	0.00102947	0.020566	6.78e-06	2.86e-05	0.00485026	0.00629091	2.88385e-05	4.65496e-05
2	1	2	0.00101197	0.020925	6.4e-06	2.93e-05	0.00492384	0.00638287	2.9508e-05	4.61689e-05
1.2	1	3	0.00129023	0.0143087	9.6e-06	1.52e-05	0.00429281	0.00457601	1.52835e-05	5.3853e-05
1.3	1	3	0.00123661	0.0158794	9.2e-06	1.84e-05	0.00437178	0.00494942	1.85783e-05	5.21192e-05
1.4	1	3	0.00119457	0.0169002	8.82e-06	2.06e-05	0.00444731	0.0052516	2.07834e-05	5.09373e-05
1.5	1	3	0.00116088	0.017689	8.45e-06	2.23e-05	0.00452028	0.00548076	2.24987e-05	5.00156e-05
1.6	1	3	0.00112941	0.0183836	8.07e-06	2.38e-05	0.00459522	0.00567912	2.40056e-05	4.9168e-05
1.7	1	3	0.00110764	0.0189242	7.72e-06	2.5e-05	0.00466381	0.00583046	2.51577e-05	4.85704e-05
1.8	1	3	0.00108484	0.0194318	7.35e-06	2.6e-05	0.00473628	0.00597004	2.62181e-05	4.79784e-05
1.9	1	3	0.00106496	0.0198782	6.99e-06	2.69e-05	0.00480811	0.00609034	2.71233e-05	4.74761e-05
2	1	3	0.00104879	0.0202648	6.64e-06	2.77e-05	0.00487782	0.00619227	2.78777e-05	4.7079e-05
1.4	1	4	0.00124811	0.0153941	9.05e-06	1.72e-05	0.00440047	0.00479259	1.73775e-05	5.26865e-05
1.5	1	4	0.00120651	0.0165155	8.66e-06	1.96e-05	0.0044775	0.00512587	1.975e-05	5.1426e-05
1.6	1	4	0.00117222	0.0173427	8.29e-06	2.13e-05	0.00455242	0.00536662	2.15133e-05	5.04748e-05
1.7	1	4	0.00114653	0.0179892	7.93e-06	2.27e-05	0.00462249	0.00555135	2.28854e-05	4.97613e-05
1.8	1	4	0.00112242	0.01857	7.57e-06	2.39e-05	0.004694	0.00571461	2.41072e-05	4.91024e-05
1.9	1	4	0.00109934	0.0191025	7.2e-06	2.5e-05	0.0047673	0.00586184	2.52114e-05	4.84851e-05
2	1	4	0.0010797	0.0195666	6.83e-06	2.59e-05	0.00483918	0.00598773	2.61497e-05	4.79681e-05
1.5	1	5	0.00126056	0.0147542	8.92e-06	1.58e-05	0.00442683	0.00479938	1.58937e-05	5.3391e-05
1.6	1	5	0.00122345	0.015981	8.54e-06	1.83e-05	0.00450119	0.00495531	1.84209e-05	5.21039e-05
1.7	1	5	0.0011893	0.0168942	8.16e-06	2.02e-05	0.00457705	0.00522275	2.03334e-05	5.1086e-05
1.8	1	5	0.00115904	0.0176267	7.78e-06	2.17e-05	0.0046528	0.00543304	2.1865e-05	5.02483e-05
1.9	1	5	0.00113716	0.0181974	7.42e-06	2.29e-05	0.00472238	0.00559379	2.30442e-05	4.96386e-05
2	1	5	0.00111431	0.0187446	7.05e-06	2.4e-05	0.00479591	0.00574569	2.41648e-05	4.90178e-05
1.7	1	6	0.00123557	0.0153939	8.41e-06	1.69e-05	0.00452789	0.00496781	1.7018e-05	5.27594e-05
1.8	1	6	0.00120714	0.0163512	8.05e-06	1.88e-05	0.00459868	0.00508581	1.89806e-05	5.17792e-05
1.9	1	6	0.00117656	0.0171683	7.66e-06	2.05e-05	0.0046756	0.00528705	2.06664e-05	5.08703e-05
2	1	6	0.00114968	0.017832	7.28e-06	2.18e-05	0.0047517	0.00547527	2.20243e-05	5.01242e-05
1.9	1	7	0.0012196	0.0157633	7.92e-06	1.74e-05	0.00462448	0.00512881	1.75667e-05	5.24391e-05
2	1	7	0.00118921	0.016702	7.53e-06	1.93e-05	0.00470229	0.00525848	1.94753e-05	5.14306e-05
1.2	1.5	-5	0.000855824	0.0224782	7.95e-06	3.55e-05	0.00461861	0.00693768	3.57546e-05	4.28385e-05
1.3	1.5	-5	0.000837288	0.0227909	7.56e-06	3.6e-05	0.00469622	0.00701294	3.62989e-05	4.25441e-05
1.4	1.5	-5	0.000818937	0.0230909	7.15e-06	3.65e-05	0.00477599	0.00708338	3.67872e-05	4.22585e-05
1.5	1.5	-5	0.000801845	0.0233766	6.74e-06	3.69e-05	0.00485687	0.00714883	3.72201e-05	4.20026e-05
1.6	1.5	-5	0.000785596	0.0236515	6.33e-06	3.73e-05	0.00493904	0.00721042	3.76083e-05	4.17678e-05
1.7	1.5	-5	0.000771321	0.0239153	5.91e-06	3.77e-05	0.00502115	0.00726842	3.79586e-05	4.15685e-05
1.8	1.5	-5	0.00075867	0.0241687	5.5e-06	3.8e-05	0.00510322	0.00732308	3.82734e-05	4.13994e-05
1.9	1.5	-5	0.00074479	0.0244209	5.07e-06	3.83e-05	0.00518832	0.00737636	3.85634e-05	4.1213e-05
2	1.5	-5	0.000733413	0.0246615	4.64e-06	3.85e-05	0.00527203	0.00742635	3.88223e-05	4.10722e-05
1.2	1.5	-4	0.000911957	0.0218314	8.16e-06	3.37e-05	0.00457651	0.00674921	3.39575e-05	4.38579e-05
1.3	1.5	-4	0.00089022	0.0221744	7.77e-06	3.43e-05	0.00465322	0.00683466	3.46005e-05	4.34782e-05
1.4	1.5	-4	0.000870605	0.0224932	7.38e-06	3.49e-05	0.00473078	0.00691206	3.5161e-05	4.31431e-05
1.5	1.5	-4	0.000854345	0.0227883	6.99e-06	3.54e-05	0.00480765	0.00698205	3.56485e-05	4.28752e-05
1.6	1.5	-4	0.000838594	0.023072	6.6e-06	3.58e-05	0.00488605	0.00704787	3.60891e-05	4.26206e-05
1.7	1.5	-4	0.000824052	0.0233443	6.2e-06	3.62e-05	0.00496512	0.00710978	3.64874e-05	4.23915e-05
1.8	1.5	-4	0.000811305	0.023605	5.8e-06	3.66e-05	0.005044	0.007168	3.68478e-05	4.21966e-05
1.9	1.5	-4	0.000797251	0.0238641	5.38e-06	3.69e-05	0.00512602	0.0072247	3.71825e-05	4.19849e-05
2	1.5	-4	0.000784923	0.0241145	4.97e-06	3.72e-05	0.00520765	0.00727865	3.74893e-05	4.1804e-05
1.2	1.5	-3	0.000963335	0.021166	8.36e-06	3.19e-05	0.00453798	0.00655347	3.21198e-05	4.48702e-05
1.3	1.5	-3	0.000938728	0.0215536	7.97e-06	3.26e-05	0.0046138	0.00665356	3.28992e-05	4.44102e-05
1.4	1.5	-3	0.000920104	0.0218932	7.6e-06	3.33e-05	0.00468747	0.00673899	3.35428e-05	4.40702e-05
1.5	1.5	-3	0.000899923	0.0222204	7.21e-06	3.39e-05	0.00476492	0.00681923	3.41259e-05	4.37113e-05
1.6	1.5	-3	0.000882146	0.0225253	6.82e-06	3.44e-05	0.00484249	0.00689228	3.46377e-05	4.33999e-05
1.7	1.5	-3	0.000867587	0.0228072	6.43e-06	3.48e-05	0.00491887	0.00695832	3.50827e-05	4.31535e-05
1.8	1.5	-3	0.000854602	0.0230755	6.04e-06	3.52e-05	0.00499529	0.00701996	3.54831e-05	4.29388e-05
1.9	1.5	-3	0.000840245	0.0233425	5.64e-06	3.56e-05	0.00507497	0.00708013	3.58588e-05	4.27026e-05
2	1.5	-3	0.000829733	0.023591	5.25e-06	3.59e-05	0.00515163	0.00713528	3.61919e-05	4.25359e-05
1.2	1.5	-2	0.00101559	0.0204423	8.56e-06	2.99e-05	0.00449879	0.00633925	3.01532e-05	4.59605e-05
1.3	1.5	-2	0.000989456	0.0208794	8.18e-06	3.08e-05	0.00457259	0.00645589	3.10803e-05	4.5439e-05
1.4	1.5	-2	0.000965431	0.0212747	7.8e-06	3.16e-05	0.00464781	0.00655873	3.18775e-05	4.49751e-05
1.5	1.5	-2	0.000943844	0.0216345	7.42e-06	3.23e-05	0.00472375	0.00664998	3.25641e-05	4.45696e-05
1.6	1.5	-2	0.000926354	0.0219586	7.04e-06	3.29e-05	0.00479829	0.00673024	3.31493e-05	4.42465e-05
1.7	1.5	-2	0.000909581	0.0222652	6.66e-06	3.34e-05	0.00487425	0.00680448	3.36723e-05	4.39441e-05
1.8	1.5	-2	0.000894157	0.022555	6.27e-06	3.39e-05	0.00495079	0.00687311	3.41388e-05	4.36717e-05
1.9	1.5	-2	0.000879444	0.0228334	5.88e-06	3.43e-05	0.00502842	0.00693771	3.45624e-05	4.34159e-05
2	1.5	-2	0.000868219	0.0230908	5.49e-06	3.47e-05	0.00510353	0.0069964	3.4934e-05	4.32247e-05
1.2	1.5	-1	0.00106738	0.019648	8.75e-06	2.78e-05	0.00445995	0.00610238	2.80332e-05	4.71334e-05
1.3	1.5	-1	0.00103775	0.0201598	8.38e-06	2.89e-05	0.00453335	0.00624308	2.91606e-05	4.64894e-05
1.4	1.5	-1	0.00101036	0.0206141	8e-06	2.99e-05	0.0046085	0.00636488	3.01196e-05	4.59242e-05
1.5	1.5	-1	0.000989438	0.0210032	7.63e-06	3.07e-05	0.004681	0.00646665	3.09032e-05	4.55008e-05
1.6	1.5	-1	0.000968843	0.0213672	7.26e-06	3.14e-05	0.0047558	0.00655969	3.16017e-05	4.51005e-05
1.7	1.5	-1	0.000950062	0.0217036	6.87e-06	3.2e-05	0.00483124	0.00664372	3.22145e-05	4.47458e-05
1.8	1.5	-1	0.000934475	0.0220112	6.5e-06	3.25e-05	0.00490544	0.0067189	3.27463e-05	4.44547e-05
1.9	1.5	-1	0.000917353	0.0223145	6.1e-06	3.3e-05	0.0049834	0.00679149	3.32435e-05	4.41439e-05
2	1.5	-1	0.000903386	0.0225942	5.72e-06	3.34e-05	0.00505957	0.0068571	3.36777e-05	4.38934e-05
1.2	1.5	0	0.00111687	0.0187439	8.94e-06	2.55e-05	0.00442283	0.00583025	2.56687e-05	4.84177e-05
1.3	1.5	0	0.00108283	0.0193761	8.57e-06	2.69e-05	0.00449672	0.00600911	2.7099e-05	4.75892e-05
1.4	1.5	0	0.00105571	0.0198895	8.2e-06	2.8e-05	0.00456882	0.00615073	2.82204e-05	4.69642e-05
1.5	1.5	0	0.00103192	0.0203372	7.84e-06	2.89e-05	0.00464117	0.00627134	2.91612e-05	4.64415e-05
1.6	1.5	0	0.001011	0.0207354	7.47e-06	2.97e-05	0.00471364	0.00637614	2.99626e-05	4.60013e-05
1.7	1.5	0	0.000991182	0.0211041	7.09e-06	3.04e-05	0.00478755	0.00647102	3.06722e-05	4.56003e-05
1.8	1.5	0	0.000973171	0.0214451	6.72e-06	3.11e-05	0.0048619	0.00655693	3.12988e-05	4.52447e-05
1.9	1.5	0	0.000955956	0.0217673	6.34e-06	3.16e-05	0.00493756	0.00663638	3.18624e-05	4.49148e-05
2	1.5	0	0.000941481	0.0220638	5.96e-06	3.21e-05	0.00501195	0.00670802	3.23554e-05	4.46421e-05
1.2	1.5	1	0.00116433	0.0176821	9.12e-06	2.28e-05	0.00438723	0.00550785	2.29772e-05	4.9822e-05
1.3	1.5	1	0.00112868	0.0184487	8.76e-06	2.45e-05	0.00445947	0.00573001	2.47174e-05	4.88661e-05
1.4	1.5	1	0.00109928	0.0190713	8.4e-06	2.59e-05	0.00453069	0.0059066	2.61078e-05	4.81045e-05
1.5	1.5	1	0.00107285	0.0196046	8.03e-06	2.71e-05	0.0046028	0.00605451	2.72668e-05	4.74564e-05
1.6	1.5	1	0.00105143	0.0200538	7.67e-06	2.8e-05	0.00467321	0.00617623	2.8208e-05	4.69523e-05
1.7	1.5	1	0.00102835	0.0204808	7.29e-06	2.88e-05	0.00474806	0.00628947	2.90703e-05	4.64435e-05
1.8	1.5	1	0.00101206	0.0208386	6.94e-06	2.95e-05	0.00481815	0.00638213	2.97598e-05	4.60902e-05
1.9	1.5	1	0.000994118	0.0211877	6.56e-06	3.02e-05	0.00489224	0.00647075	3.04052e-05	4.57222e-05
2	1.5	1	0.000975111	0.0215289	6.17e-06	3.08e-05	0.00496991	0.0065557	3.10097e-05	4.53448e-05
1.2	1.5	2	0.0012211	0.0163464	9.34e-06	1.96e-05	0.00434466	0.00510058	1.97756e-05	5.15172e-05
1.3	1.5	2	0.00117967	0.0173062	8.97e-06	2.17e-05	0.00441803	0.0053841	2.18993e-05	5.03824e-05
1.4	1.5	2	0.001146	0.0180764	8.6e-06	2.34e-05	0.00448981	0.00560757	2.36121e-05	4.94607e-05
1.5	1.5	2	0.00111718	0.0187207	8.24e-06	2.48e-05	0.00456124	0.00579103	2.50321e-05	4.86863e-05
1.6	1.5	2	0.00109045	0.019286	7.87e-06	2.6e-05	0.00463419	0.00594881	2.62542e-05	4.79961e-05
1.7	1.5	2	0.00106681	0.0197752	7.5e-06	2.71e-05	0.00470719	0.00608239	2.72801e-05	4.74136e-05
1.8	1.5	2	0.00104711	0.020197	7.14e-06	2.79e-05	0.00477872	0.00619497	2.81317e-05	4.69458e-05
1.9	1.5	2	0.00103065	0.020568	6.78e-06	2.86e-05	0.00484886	0.00629187	2.88506e-05	4.65691e-05
2	1.5	2	0.00101313	0.0209269	6.41e-06	2.93e-05	0.00492239	0.0063838	2.95201e-05	4.6188e-05
1.2	1.5	3	0.00128628	0.014421	9.58e-06	1.54e-05	0.00429577	0.00458095	1.55165e-05	5.37169e-05
1.3	1.5	3	0.00123252	0.0159579	9.18e-06	1.86e-05	0.0043751	0.0049732	1.8752e-05	5.2004e-05
1.4	1.5	3	0.00119573	0.016902	8.82e-06	2.06e-05	0.0044463	0.00525239	2.07915e-05	5.0957e-05
1.5	1.5	3	0.00115752	0.0177408	8.43e-06	2.24e-05	0.00452343	0.00549613	2.2619e-05	4.99289e-05
1.6	1.5	3	0.00113051	0.0183853	8.07e-06	2.38e-05	0.00459413	0.00567991	2.40145e-05	4.91863e-05
1.7	1.5	3	0.00110399	0.0189725	7.7e-06	2.51e-05	0.00466769	0.00584444	2.52704e-05	4.84793e-05
1.8	1.5	3	0.00108589	0.0194335	7.36e-06	2.6e-05	0.00473509	0.00597083	2.62277e-05	4.79958e-05
1.9	1.5	3	0.001066	0.0198798	7e-06	2.69e-05	0.00480689	0.00609111	2.71329e-05	4.74931e-05
2	1.5	3	0.00104495	0.0203061	6.61e-06	2.77e-05	0.00488261	0.00620378	2.79703e-05	4.6993e-05
1.4	1.5	4	0.00124915	0.0153955	9.06e-06	1.72e-05	0.00439956	0.00479321	1.73834e-05	5.27045e-05
1.5	1.5	4	0.00120751	0.016517	8.67e-06	1.96e-05	0.00447656	0.00512653	1.97567e-05	5.14433e-05
1.6	1.5	4	0.00117319	0.0173441	8.29e-06	2.13e-05	0.00455145	0.00536727	2.15203e-05	5.04913e-05
1.7	1.5	4	0.00114748	0.0179907	7.94e-06	2.27e-05	0.00462148	0.00555202	2.28929e-05	4.97774e-05
1.8	1.5	4	0.00111876	0.0186205	7.55e-06	2.4e-05	0.00469812	0.00572923	2.42224e-05	4.90121e-05
1.9	1.5	4	0.00110026	0.0191038	7.2e-06	2.5e-05	0.00476621	0.0058625	2.52194e-05	4.85002e-05
2	1.5	4	0.0010806	0.0195678	6.84e-06	2.6e-05	0.00483805	0.00598838	2.61578e-05	4.7983e-05
1.5	1.5	5	0.00126147	0.0147553	8.93e-06	1.58e-05	0.00442597	0.00479795	1.58985e-05	5.34068e-05
1.6	1.5	5	0.00122434	0.0159822	8.55e-06	1.83e-05	0.0045003	0.00495584	1.84262e-05	5.21191e-05
1.7	1.5	5	0.00119016	0.0168954	8.17e-06	2.02e-05	0.00457613	0.00522332	2.03393e-05	5.11009e-05
1.8	1.5	5	0.00115988	0.0176279	7.78e-06	2.17e-05	0.00465186	0.00543361	2.18713e-05	5.02624e-05
1.9	1.5	5	0.00113799	0.0181985	7.43e-06	2.29e-05	0.0047214	0.00559435	2.30506e-05	4.96525e-05
2	1.5	5	0.00111512	0.0187457	7.06e-06	2.4e-05	0.0047949	0.00574625	2.41715e-05	4.90314e-05
1.7	1.5	6	0.00123635	0.0153949	8.41e-06	1.69e-05	0.00452705	0.00496642	1.70224e-05	5.27729e-05
1.8	1.5	6	0.00120286	0.0164359	8.03e-06	1.9e-05	0.0046035	0.00509383	1.91628e-05	5.16549e-05
1.9	1.5	6	0.00117731	0.0171692	7.67e-06	2.05e-05	0.00467471	0.00528751	2.06716e-05	5.08829e-05
2	1.5	6	0.00115041	0.0178329	7.28e-06	2.19e-05	0.00475079	0.00547574	2.20297e-05	5.01364e-05
1.9	1.5	7	0.00122028	0.015764	7.92e-06	1.74e-05	0.00462367	0.00512745	1.75705e-05	5.24507e-05
2	1.5	7	0.00118987	0.0167027	7.53e-06	1.93e-05	0.00470146	0.00525709	1.94795e-05	5.14418e-05
1.2	2	-5	0.000854441	0.0224885	7.94e-06	3.55e-05	0.00461965	0.00694058	3.57813e-05	4.28141e-05
1.3	2	-5	0.000835837	0.0228011	7.55e-06	3.6e-05	0.0046974	0.00701574	3.63244e-05	4.2519e-05
1.4	2	-5	0.000817424	0.0231003	7.15e-06	3.65e-05	0.00477731	0.00708588	3.68091e-05	4.22352e-05
1.5	2	-5	0.000800273	0.0233857	6.74e-06	3.69e-05	0.00485834	0.00715124	3.72407e-05	4.19792e-05
1.6	2	-5	0.000786696	0.0236548	6.33e-06	3.73e-05	0.00493794	0.00721172	3.76253e-05	4.17866e-05
1.7	2	-5	0.000772402	0.0239185	5.92e-06	3.77e-05	0.00502	0.00726971	3.79757e-05	4.15873e-05
1.8	2	-5	0.000758109	0.0241757	5.49e-06	3.8e-05	0.00510385	0.00732502	3.82917e-05	4.13919e-05
1.9	2	-5	0.000745833	0.024424	5.07e-06	3.83e-05	0.00518708	0.00737763	3.85805e-05	4.12313e-05
2	2	-5	0.00073444	0.0246645	4.65e-06	3.85e-05	0.00527075	0.00742761	3.88396e-05	4.10904e-05
1.2	2	-4	0.000910481	0.021841	8.16e-06	3.37e-05	0.00457762	0.00675187	3.39812e-05	4.3832e-05
1.3	2	-4	0.000891062	0.0221767	7.78e-06	3.43e-05	0.00465253	0.00683556	3.46116e-05	4.34922e-05
1.4	2	-4	0.000871429	0.0224955	7.39e-06	3.49e-05	0.00473006	0.00691296	3.51722e-05	4.3157e-05
1.5	2	-4	0.000855155	0.0227905	7e-06	3.54e-05	0.00480689	0.00698292	3.56597e-05	4.28887e-05
1.6	2	-4	0.000839388	0.0230742	6.6e-06	3.58e-05	0.00488525	0.00704875	3.61005e-05	4.2634e-05
1.7	2	-4	0.000822334	0.0233537	6.19e-06	3.62e-05	0.00496695	0.00711217	3.65064e-05	4.23627e-05
1.8	2	-4	0.000809551	0.0236141	5.79e-06	3.66e-05	0.00504598	0.00717023	3.68648e-05	4.21688e-05
1.9	2	-4	0.000798007	0.0238661	5.39e-06	3.69e-05	0.00512513	0.00722554	3.71939e-05	4.19978e-05
2	2	-4	0.000785666	0.0241164	4.97e-06	3.72e-05	0.00520672	0.00727948	3.75007e-05	4.18167e-05
1.2	2	-3	0.000963994	0.0211677	8.36e-06	3.19e-05	0.00453748	0.00655413	3.21277e-05	4.48812e-05
1.3	2	-3	0.00093937	0.0215553	7.98e-06	3.26e-05	0.00461328	0.00665421	3.29071e-05	4.44206e-05
1.4	2	-3	0.00091851	0.021903	7.59e-06	3.33e-05	0.00468886	0.00674164	3.35653e-05	4.40412e-05
1.5	2	-3	0.000900538	0.0222219	7.21e-06	3.39e-05	0.00476435	0.00681986	3.41339e-05	4.37216e-05
1.6	2	-3	0.000882749	0.0225268	6.82e-06	3.44e-05	0.00484189	0.0068929	3.46457e-05	4.341e-05
1.7	2	-3	0.000868179	0.0228087	6.43e-06	3.48e-05	0.00491824	0.00695894	3.50908e-05	4.31634e-05
1.8	2	-3	0.000852861	0.0230849	6.03e-06	3.52e-05	0.00499725	0.00702231	3.55012e-05	4.29085e-05
1.9	2	-3	0.000840819	0.0233438	5.64e-06	3.56e-05	0.00507429	0.00708073	3.58669e-05	4.27122e-05
2	2	-3	0.000827936	0.0236002	5.24e-06	3.59e-05	0.00515388	0.00713746	3.62075e-05	4.25062e-05
1.2	2	-2	0.00101611	0.0204436	8.56e-06	2.99e-05	0.0044984	0.00633975	3.0159e-05	4.59692e-05
1.3	2	-2	0.000989965	0.0208806	8.19e-06	3.08e-05	0.00457217	0.00645637	3.1086e-05	4.54475e-05
1.4	2	-2	0.000965928	0.0212759	7.8e-06	3.16e-05	0.00464737	0.00655921	3.18833e-05	4.49833e-05
1.5	2	-2	0.000944331	0.0216356	7.42e-06	3.23e-05	0.00472329	0.00665045	3.257e-05	4.45776e-05
1.6	2	-2	0.000924708	0.0219689	7.03e-06	3.29e-05	0.00479993	0.00673298	3.31718e-05	4.42156e-05
1.7	2	-2	0.000907905	0.0222754	6.65e-06	3.34e-05	0.00487603	0.00680712	3.36935e-05	4.39129e-05
1.8	2	-2	0.000894618	0.0225561	6.27e-06	3.39e-05	0.00495027	0.00687357	3.41449e-05	4.36794e-05
1.9	2	-2	0.000879898	0.0228344	5.88e-06	3.43e-05	0.00502788	0.00693817	3.45685e-05	4.34234e-05
2	2	-2	0.000868667	0.0230918	5.5e-06	3.47e-05	0.00510297	0.00699684	3.49399e-05	4.32321e-05
1.2	2	-1	0.00106781	0.019649	8.76e-06	2.78e-05	0.00445962	0.00610276	2.80374e-05	4.71405e-05
1.3	2	-1	0.00103545	0.0201763	8.37e-06	2.9e-05	0.00453522	0.00624771	2.91993e-05	4.64438e-05
1.4	2	-1	0.00101076	0.020615	8e-06	2.99e-05	0.00460814	0.00636524	3.0124e-05	4.59308e-05
1.5	2	-1	0.000989838	0.0210041	7.64e-06	3.07e-05	0.00468063	0.00646702	3.09076e-05	4.55074e-05
1.6	2	-1	0.000969233	0.021368	7.26e-06	3.14e-05	0.00475541	0.00656005	3.16061e-05	4.51069e-05
1.7	2	-1	0.000950445	0.0217045	6.88e-06	3.2e-05	0.00483083	0.00664408	3.2219e-05	4.47522e-05
1.8	2	-1	0.000934851	0.0220121	6.5e-06	3.25e-05	0.00490501	0.00671926	3.27509e-05	4.44611e-05
1.9	2	-1	0.000917723	0.0223152	6.11e-06	3.3e-05	0.00498296	0.00679182	3.3248e-05	4.41499e-05
2	2	-1	0.00090375	0.022595	5.72e-06	3.34e-05	0.00505911	0.00685744	3.36823e-05	4.38994e-05
1.2	2	0	0.00111723	0.0187447	8.94e-06	2.55e-05	0.00442256	0.00583055	2.56719e-05	4.84237e-05
1.3	2	0	0.00108318	0.0193768	8.57e-06	2.69e-05	0.00449644	0.00600939	2.71022e-05	4.7595e-05
1.4	2	0	0.00105605	0.0198902	8.2e-06	2.8e-05	0.00456852	0.00615104	2.82239e-05	4.697e-05
1.5	2	0	0.00103226	0.0203379	7.84e-06	2.89e-05	0.00464086	0.00627164	2.91648e-05	4.64471e-05
1.6	2	0	0.00101133	0.0207361	7.47e-06	2.97e-05	0.00471331	0.00637642	2.99661e-05	4.60068e-05
1.7	2	0	0.000988798	0.0211203	7.08e-06	3.05e-05	0.00479008	0.00647535	3.07068e-05	4.55537e-05
1.8	2	0	0.000970754	0.0214604	6.7e-06	3.11e-05	0.00486462	0.00656091	3.13297e-05	4.52e-05
1.9	2	0	0.000954321	0.021778	6.33e-06	3.16e-05	0.0049395	0.00663916	3.18839e-05	4.4885e-05
2	2	0	0.000941785	0.0220644	5.96e-06	3.21e-05	0.00501157	0.0067083	3.23591e-05	4.46471e-05
1.2	2	1	0.00116464	0.0176827	9.12e-06	2.28e-05	0.004387	0.00550809	2.29796e-05	4.98273e-05
1.3	2	1	0.00112898	0.0184493	8.76e-06	2.45e-05	0.00445923	0.00573023	2.47198e-05	4.8871e-05
1.4	2	1	0.00109957	0.0190718	8.4e-06	2.59e-05	0.00453044	0.00590683	2.61104e-05	4.81093e-05
1.5	2	1	0.00107314	0.0196051	8.03e-06	2.71e-05	0.00460253	0.00605475	2.72695e-05	4.74613e-05
1.6	2	1	0.00105171	0.0200543	7.68e-06	2.8e-05	0.00467293	0.00617645	2.82107e-05	4.69568e-05
1.7	2	1	0.00102863	0.0204813	7.3e-06	2.88e-05	0.00474776	0.00628969	2.90731e-05	4.6448e-05
1.8	2	1	0.00101233	0.0208391	6.94e-06	2.95e-05	0.00481785	0.00638235	2.97626e-05	4.60945e-05
1.9	2	1	0.000994382	0.0211882	6.57e-06	3.02e-05	0.00489193	0.00647098	3.04081e-05	4.57266e-05
2	2	1	0.000975371	0.0215294	6.17e-06	3.08e-05	0.00496959	0.00655592	3.10126e-05	4.5349e-05
1.2	2	2	0.00122137	0.0163469	9.34e-06	1.96e-05	0.00434445	0.00510077	1.97775e-05	5.15217e-05
1.3	2	2	0.00117994	0.0173067	8.97e-06	2.17e-05	0.00441782	0.00538429	2.19013e-05	5.03869e-05
1.4	2	2	0.00114626	0.0180768	8.6e-06	2.34e-05	0.00448959	0.00560776	2.36141e-05	4.9465e-05
1.5	2	2	0.00111743	0.0187212	8.24e-06	2.48e-05	0.00456101	0.00579122	2.50342e-05	4.86904e-05
1.6	2	2	0.00109069	0.0192864	7.87e-06	2.6e-05	0.00463395	0.00594899	2.62563e-05	4.80002e-05
1.7	2	2	0.00106705	0.0197756	7.5e-06	2.71e-05	0.00470694	0.00608256	2.72822e-05	4.74173e-05
1.8	2	2	0.00104734	0.0201974	7.14e-06	2.79e-05	0.00477846	0.00619516	2.8134e-05	4.69496e-05
1.9	2	2	0.00103088	0.0205684	6.79e-06	2.86e-05	0.00484859	0.00629204	2.88528e-05	4.65727e-05
2	2	2	0.00101335	0.0209273	6.41e-06	2.93e-05	0.00492211	0.00638399	2.95225e-05	4.61917e-05
1.2	2	3	0.00128652	0.0144213	9.59e-06	1.54e-05	0.00429559	0.00458065	1.55178e-05	5.37212e-05
1.3	2	3	0.00123275	0.0159582	9.18e-06	1.86e-05	0.00437491	0.00497335	1.87534e-05	5.2008e-05
1.4	2	3	0.00119059	0.0169672	8.8e-06	2.08e-05	0.00445079	0.00527169	2.09367e-05	5.08327e-05
1.5	2	3	0.00115774	0.0177412	8.43e-06	2.24e-05	0.00452322	0.00549628	2.26206e-05	4.99325e-05
1.6	2	3	0.00113072	0.0183857	8.08e-06	2.38e-05	0.00459392	0.00568007	2.40163e-05	4.919e-05
1.7	2	3	0.0011042	0.0189728	7.7e-06	2.51e-05	0.00466747	0.0058446	2.52722e-05	4.84827e-05
1.8	2	3	0.0010861	0.0194338	7.36e-06	2.6e-05	0.00473486	0.00597098	2.62295e-05	4.79992e-05
1.9	2	3	0.0010662	0.0198802	7e-06	2.69e-05	0.00480665	0.00609127	2.71349e-05	4.74966e-05
2	2	3	0.00104515	0.0203064	6.61e-06	2.78e-05	0.00488236	0.00620393	2.79722e-05	4.69962e-05
1.4	2	4	0.00124935	0.0153958	9.06e-06	1.72e-05	0.00439938	0.00479334	1.73846e-05	5.2708e-05
1.5	2	4	0.00120771	0.0165172	8.67e-06	1.96e-05	0.00447637	0.00512664	1.97579e-05	5.14465e-05
1.6	2	4	0.00117338	0.0173444	8.29e-06	2.14e-05	0.00455126	0.00536741	2.15217e-05	5.04946e-05
1.7	2	4	0.001145	0.0180213	7.92e-06	2.28e-05	0.00462412	0.0055609	2.29611e-05	4.97172e-05
1.8	2	4	0.00111894	0.0186208	7.55e-06	2.4e-05	0.00469791	0.00572936	2.4224e-05	4.90151e-05
1.9	2	4	0.00110043	0.0191041	7.2e-06	2.5e-05	0.004766	0.00586264	2.5221e-05	4.85033e-05
2	2	4	0.00108077	0.0195681	6.84e-06	2.6e-05	0.00483784	0.00598851	2.61594e-05	4.79859e-05
1.5	2	5	0.00126165	0.0147555	8.93e-06	1.58e-05	0.00442581	0.00479768	1.58994e-05	5.34099e-05
1.6	2	5	0.00122451	0.0159824	8.55e-06	1.83e-05	0.00450013	0.00495594	1.84272e-05	5.21221e-05
1.7	2	5	0.00119033	0.0168956	8.17e-06	2.02e-05	0.00457595	0.00522342	2.03404e-05	5.11036e-05
1.8	2	5	0.00116004	0.0176281	7.78e-06	2.17e-05	0.00465168	0.00543371	2.18725e-05	5.02651e-05
1.9	2	5	0.00113552	0.0182296	7.41e-06	2.29e-05	0.00472433	0.00560326	2.31185e-05	4.95921e-05
2	2	5	0.00111527	0.0187459	7.06e-06	2.4e-05	0.00479471	0.00574635	2.41727e-05	4.90341e-05
1.7	2	6	0.00123651	0.015395	8.41e-06	1.69e-05	0.00452689	0.00496615	1.70232e-05	5.27756e-05
1.8	2	6	0.00120301	0.0164361	8.03e-06	1.9e-05	0.00460333	0.00509355	1.91638e-05	5.16575e-05
1.9	2	6	0.00117745	0.0171694	7.67e-06	2.05e-05	0.00467454	0.0052876	2.06726e-05	5.08855e-05
2	2	6	0.00115055	0.0178331	7.28e-06	2.19e-05	0.00475061	0.00547582	2.20307e-05	5.01387e-05
1.9	2	7	0.00122042	0.0157642	7.93e-06	1.74e-05	0.00462351	0.00512719	1.75714e-05	5.2453e-05
2	2	7	0.00119	0.0167029	7.53e-06	1.93e-05	0.00470129	0.00525682	1.94804e-05	5.14442e-05
1.2	2.5	-5	0.000858391	0.0224577	7.96e-06	3.54e-05	0.00461669	0.00693188	3.57005e-05	4.28826e-05
1.3	2.5	-5	0.000837383	0.0227774	7.56e-06	3.6e-05	0.00469615	0.0070088	3.62563e-05	4.2544e-05
1.4	2.5	-5	0.000819125	0.0230765	7.15e-06	3.65e-05	0.00477583	0.007079	3.67422e-05	4.22622e-05
1.5	2.5	-5	0.000804803	0.0233556	6.76e-06	3.69e-05	0.0048541	0.00714317	3.71697e-05	4.20516e-05
1.6	2.5	-5	0.000788663	0.0236312	6.34e-06	3.73e-05	0.00493598	0.00720507	3.7562e-05	4.18157e-05
1.7	2.5	-5	0.000773802	0.0238967	5.93e-06	3.76e-05	0.00501852	0.0072635	3.79154e-05	4.16059e-05
1.8	2.5	-5	0.000759622	0.0241542	5.5e-06	3.79e-05	0.00510214	0.00731898	3.82338e-05	4.14112e-05
1.9	2.5	-5	0.000747442	0.024402	5.08e-06	3.82e-05	0.00518517	0.00737148	3.85222e-05	4.12527e-05
2	2.5	-5	0.000734495	0.0246472	4.65e-06	3.85e-05	0.00527068	0.00742241	3.87854e-05	4.1085e-05
1.2	2.5	-4	0.00091243	0.0218185	8.17e-06	3.37e-05	0.00457616	0.0067453	3.39192e-05	4.38691e-05
1.3	2.5	-4	0.000890774	0.0221621	7.78e-06	3.43e-05	0.00465277	0.00683099	3.45646e-05	4.34892e-05
1.4	2.5	-4	0.000871234	0.0224811	7.39e-06	3.48e-05	0.00473023	0.00690848	3.51262e-05	4.31551e-05
1.5	2.5	-4	0.000855039	0.0227763	7e-06	3.53e-05	0.004807	0.00697855	3.56148e-05	4.28876e-05
1.6	2.5	-4	0.000839347	0.0230604	6.6e-06	3.58e-05	0.00488529	0.00704454	3.60573e-05	4.26327e-05
1.7	2.5	-4	0.000824861	0.0233324	6.2e-06	3.62e-05	0.00496426	0.0071064	3.64552e-05	4.2405e-05
1.8	2.5	-4	0.000812165	0.0235926	5.8e-06	3.65e-05	0.00504304	0.00716451	3.68149e-05	4.22117e-05
1.9	2.5	-4	0.000798162	0.0238522	5.39e-06	3.69e-05	0.00512494	0.00722137	3.71516e-05	4.19992e-05
2	2.5	-4	0.000785879	0.0241025	4.97e-06	3.72e-05	0.00520645	0.00727536	3.74591e-05	4.18185e-05
1.2	2.5	-3	0.000966219	0.0211447	8.37e-06	3.18e-05	0.00453582	0.00654743	3.20665e-05	4.49255e-05
1.3	2.5	-3	0.000941718	0.0215328	7.99e-06	3.26e-05	0.00461137	0.00664777	3.28486e-05	4.44666e-05
1.4	2.5	-3	0.000918748	0.0218897	7.6e-06	3.33e-05	0.00468866	0.0067376	3.35257e-05	4.40477e-05
1.5	2.5	-3	0.000900844	0.0222089	7.21e-06	3.38e-05	0.00476406	0.00681594	3.40955e-05	4.37288e-05
1.6	2.5	-3	0.000885391	0.0225056	6.83e-06	3.43e-05	0.00483925	0.0068871	3.4595e-05	4.34589e-05
1.7	2.5	-3	0.000868604	0.022796	6.44e-06	3.48e-05	0.00491779	0.00695521	3.50545e-05	4.31719e-05
1.8	2.5	-3	0.000855661	0.0230649	6.05e-06	3.52e-05	0.0049941	0.00701705	3.54572e-05	4.29562e-05
1.9	2.5	-3	0.000841346	0.0233312	5.65e-06	3.55e-05	0.00507366	0.00707704	3.58314e-05	4.27225e-05
2	2.5	-3	0.000830868	0.0235795	5.26e-06	3.59e-05	0.00515021	0.00713218	3.61647e-05	4.25562e-05
1.2	2.5	-2	0.0010173	0.0204252	8.56e-06	2.99e-05	0.00449751	0.00633428	3.01092e-05	4.59952e-05
1.3	2.5	-2	0.000988353	0.0208767	8.18e-06	3.08e-05	0.00457348	0.00645483	3.10678e-05	4.54208e-05
1.4	2.5	-2	0.000966422	0.0212631	7.81e-06	3.16e-05	0.00464694	0.00655538	3.18473e-05	4.49939e-05
1.5	2.5	-2	0.000946982	0.0216138	7.43e-06	3.23e-05	0.0047208	0.00664439	3.25174e-05	4.46276e-05
1.6	2.5	-2	0.000927442	0.0219474	7.05e-06	3.29e-05	0.0047972	0.00672711	3.31215e-05	4.42666e-05
1.7	2.5	-2	0.000910709	0.0222541	6.66e-06	3.34e-05	0.00487305	0.00680138	3.3645e-05	4.39651e-05
1.8	2.5	-2	0.000895324	0.0225441	6.27e-06	3.38e-05	0.00494948	0.00687011	3.41127e-05	4.36933e-05
1.9	2.5	-2	0.000880646	0.022823	5.88e-06	3.43e-05	0.00502699	0.00693494	3.45388e-05	4.34361e-05
2	2.5	-2	0.000867252	0.0230887	5.49e-06	3.46e-05	0.00510474	0.00699545	3.4921e-05	4.32086e-05
1.2	2.5	-1	0.00106645	0.0196459	8.75e-06	2.78e-05	0.00446064	0.00610156	2.8024e-05	4.7118e-05
1.3	2.5	-1	0.00103957	0.0201426	8.39e-06	2.89e-05	0.00453187	0.0062381	2.91177e-05	4.65257e-05
1.4	2.5	-1	0.00101223	0.0205976	8.01e-06	2.98e-05	0.00460686	0.00636018	3.00793e-05	4.59607e-05
1.5	2.5	-1	0.000988576	0.0210013	7.63e-06	3.06e-05	0.00468181	0.00646586	3.08935e-05	4.54866e-05
1.6	2.5	-1	0.000967998	0.0213653	7.25e-06	3.13e-05	0.00475664	0.0065589	3.15918e-05	4.50865e-05
1.7	2.5	-1	0.000949234	0.0217018	6.87e-06	3.19e-05	0.00483212	0.00664295	3.22046e-05	4.47322e-05
1.8	2.5	-1	0.00093366	0.0220095	6.49e-06	3.25e-05	0.00490635	0.00671814	3.27364e-05	4.44413e-05
1.9	2.5	-1	0.000918606	0.0223033	6.11e-06	3.3e-05	0.00498192	0.00678847	3.3218e-05	4.41672e-05
2	2.5	-1	0.000904668	0.0225832	5.73e-06	3.34e-05	0.00505797	0.00685415	3.36532e-05	4.39169e-05
1.2	2.5	0	0.00111609	0.0187423	8.94e-06	2.55e-05	0.00442341	0.00582962	2.56619e-05	4.84046e-05
1.3	2.5	0	0.00108722	0.0193371	8.59e-06	2.68e-05	0.00449316	0.00599787	2.70058e-05	4.76852e-05
1.4	2.5	0	0.00105757	0.0198709	8.21e-06	2.8e-05	0.00456718	0.00614536	2.8175e-05	4.70044e-05
1.5	2.5	0	0.00103384	0.0203198	7.85e-06	2.89e-05	0.00463937	0.0062664	2.91197e-05	4.64803e-05
1.6	2.5	0	0.00101029	0.020734	7.47e-06	2.97e-05	0.00471435	0.00637552	2.9955e-05	4.59898e-05
1.7	2.5	0	0.000993189	0.021088	7.11e-06	3.04e-05	0.00478542	0.00646662	3.06359e-05	4.56378e-05
1.8	2.5	0	0.00097249	0.0214438	6.71e-06	3.1e-05	0.00486267	0.00655631	3.12909e-05	4.52334e-05
1.9	2.5	0	0.00095723	0.0217555	6.34e-06	3.16e-05	0.00493605	0.00663315	3.18354e-05	4.494e-05
2	2.5	0	0.000940821	0.0220626	5.95e-06	3.21e-05	0.00501277	0.00670743	3.23475e-05	4.46313e-05
1.2	2.5	1	0.00116848	0.0176312	9.14e-06	2.27e-05	0.00438412	0.00549269	2.28568e-05	4.99242e-05
1.3	2.5	1	0.00113293	0.0184019	8.77e-06	2.44e-05	0.00445602	0.00571627	2.46061e-05	4.89678e-05
1.4	2.5	1	0.00110361	0.0190288	8.41e-06	2.58e-05	0.0045269	0.00589431	2.60076e-05	4.82026e-05
1.5	2.5	1	0.00107727	0.0195652	8.05e-06	2.7e-05	0.00459866	0.00604335	2.71758e-05	4.75522e-05
1.6	2.5	1	0.00105337	0.0200348	7.68e-06	2.79e-05	0.00467127	0.00617084	2.81633e-05	4.69941e-05
1.7	2.5	1	0.00103033	0.0204625	7.31e-06	2.88e-05	0.00474595	0.00628433	2.9028e-05	4.64855e-05
1.8	2.5	1	0.00101148	0.0208375	6.94e-06	2.95e-05	0.0048188	0.00638163	2.97535e-05	4.60805e-05
1.9	2.5	1	0.000993547	0.0211867	6.56e-06	3.02e-05	0.00489292	0.00647027	3.0399e-05	4.57128e-05
2	2.5	1	0.000977193	0.0215118	6.18e-06	3.07e-05	0.00496731	0.00655113	3.09731e-05	4.53864e-05
1.2	2.5	2	0.00122051	0.0163454	9.34e-06	1.96e-05	0.0043451	0.00510018	1.97718e-05	5.15071e-05
1.3	2.5	2	0.00117911	0.0173053	8.96e-06	2.17e-05	0.0044185	0.0053837	2.18953e-05	5.03729e-05
1.4	2.5	2	0.00114545	0.0180754	8.6e-06	2.34e-05	0.00449029	0.00560716	2.36077e-05	4.94515e-05
1.5	2.5	2	0.00111664	0.0187198	8.24e-06	2.48e-05	0.00456175	0.00579062	2.50274e-05	4.86772e-05
1.6	2.5	2	0.00108992	0.0192851	7.87e-06	2.6e-05	0.00463472	0.00594839	2.62493e-05	4.79875e-05
1.7	2.5	2	0.00106876	0.0197543	7.51e-06	2.7e-05	0.00470512	0.00607644	2.72314e-05	4.74582e-05
1.8	2.5	2	0.00104661	0.0201961	7.14e-06	2.79e-05	0.00477929	0.00619457	2.81267e-05	4.69376e-05
1.9	2.5	2	0.00103016	0.0205672	6.78e-06	2.86e-05	0.00484945	0.00629146	2.88454e-05	4.65608e-05
2	2.5	2	0.00101264	0.0209261	6.41e-06	2.93e-05	0.004923	0.00638342	2.9515e-05	4.61799e-05
1.2	2.5	3	0.00128575	0.0144202	9.58e-06	1.54e-05	0.00429617	0.00458161	1.55139e-05	5.37078e-05
1.3	2.5	3	0.0012373	0.0158805	9.2e-06	1.84e-05	0.00437121	0.00494987	1.85826e-05	5.21311e-05
1.4	2.5	3	0.00119524	0.0169012	8.82e-06	2.06e-05	0.00444672	0.00525205	2.07881e-05	5.09487e-05
1.5	2.5	3	0.00116153	0.0176901	8.45e-06	2.23e-05	0.00451967	0.00548124	2.25037e-05	5.00267e-05
1.6	2.5	3	0.00113005	0.0183846	8.07e-06	2.38e-05	0.00459459	0.00567959	2.40109e-05	4.91787e-05
1.7	2.5	3	0.00110826	0.0189252	7.72e-06	2.5e-05	0.00466315	0.00583092	2.51631e-05	4.85808e-05
1.8	2.5	3	0.00108545	0.0194328	7.36e-06	2.6e-05	0.00473559	0.00597048	2.62235e-05	4.79884e-05
1.9	2.5	3	0.00106556	0.0198792	6.99e-06	2.69e-05	0.0048074	0.00609079	2.71289e-05	4.74861e-05
2	2.5	3	0.00104695	0.0202855	6.63e-06	2.77e-05	0.00488011	0.00619806	2.79245e-05	4.70377e-05
1.4	2.5	4	0.00124871	0.0153949	9.06e-06	1.72e-05	0.00439994	0.00479294	1.73808e-05	5.26969e-05
1.5	2.5	4	0.00120709	0.0165163	8.67e-06	1.96e-05	0.00447695	0.00512625	1.97539e-05	5.14361e-05
1.6	2.5	4	0.00117278	0.0173435	8.29e-06	2.13e-05	0.00455186	0.005367	2.15174e-05	5.04844e-05
1.7	2.5	4	0.00114708	0.0179901	7.93e-06	2.27e-05	0.0046219	0.00555174	2.28898e-05	4.97706e-05
1.8	2.5	4	0.00112296	0.0185708	7.57e-06	2.39e-05	0.00469339	0.00571499	2.41117e-05	4.91116e-05
1.9	2.5	4	0.00109987	0.0191032	7.2e-06	2.5e-05	0.00476666	0.00586221	2.52159e-05	4.84938e-05
2	2.5	4	0.00108022	0.0195673	6.84e-06	2.59e-05	0.00483853	0.00598811	2.61545e-05	4.79769e-05
1.5	2.5	5	0.00126109	0.0147548	8.92e-06	1.58e-05	0.00442633	0.00479855	1.58965e-05	5.34e-05
1.6	2.5	5	0.00122397	0.0159817	8.55e-06	1.83e-05	0.00450067	0.00495562	1.8424e-05	5.21129e-05
1.7	2.5	5	0.0011898	0.0168949	8.16e-06	2.02e-05	0.00457652	0.00522308	2.03368e-05	5.10946e-05
1.8	2.5	5	0.00115953	0.0176274	7.78e-06	2.17e-05	0.00465225	0.00543337	2.18687e-05	5.02565e-05
1.9	2.5	5	0.00113764	0.018198	7.43e-06	2.29e-05	0.00472181	0.00559411	2.30479e-05	4.96466e-05
2	2.5	5	0.00111478	0.0187452	7.06e-06	2.4e-05	0.00479533	0.00574602	2.41687e-05	4.90257e-05
1.7	2.5	6	0.00123602	0.0153945	8.41e-06	1.69e-05	0.0045274	0.00496701	1.70206e-05	5.27673e-05
1.8	2.5	6	0.00120254	0.0164356	8.02e-06	1.9e-05	0.00460386	0.00509443	1.91609e-05	5.16495e-05
1.9	2.5	6	0.00117699	0.0171688	7.66e-06	2.05e-05	0.00467508	0.00528732	2.06694e-05	5.08777e-05
2	2.5	6	0.0011501	0.0178325	7.28e-06	2.19e-05	0.00475117	0.00547554	2.20274e-05	5.01313e-05
1.9	2.5	7	0.00122	0.0157637	7.92e-06	1.74e-05	0.00462401	0.00512802	1.75689e-05	5.24458e-05
2	2.5	7	0.0011896	0.0167024	7.53e-06	1.93e-05	0.00470181	0.00525768	1.94777e-05	5.14371e-05

## Sheet: （16，25.4）
																					whole potentials of the equilibrium droplet		the unit length energy barrier
0	0	0	0.00182368	0	1.04e-05	1.04e-05	0.00364736	0.00364736	0	4.17933e-05		(0,0,0)	-0.5911	1.018	7.802	0.6736	-2288	10.04	27.81		2.852e-06		5.6e-06
0.2	0	0	0.00171624	0.00493838	1.04e-05	1.05e-05	0.00366025	0.00366885	1.93614e-06	4.03536e-05		(1,0,0)	1.348	4.041	-13.57	3.248	5155	34.92	11.38
0.4	0	0	0.00161383	0.00654772	1.01e-05	1.06e-05	0.00369772	0.0037313	3.38051e-06	3.9041e-05		(0,1,0)	0.0712	-4.319	-0.8814	-0.2686	-142	-10.42	0.4394
0.6	0	0	0.00151142	0.00765096	9.75e-06	1.08e-05	0.00375977	0.00383471	4.56398e-06	3.78511e-05		(0,0,1)	0.007983	1.832	0.1628	0.7031	56.94	4.074	0.4552
0.7	0	0	0.00146066	0.00839125	9.5e-06	1.09e-05	0.00379983	0.00390147	5.45035e-06	3.63682e-05		(2,0,0)	2.144	11.9	14.03	6.076	-3522	4.347	0.9933
0.75	0	0	0.00139225	0.0100104	9.24e-06	1.1e-05	0.0038415	0.00397093	7.69876e-06	3.5525e-05		(1,1,0)	-0.04536	2.065	0.9281	0.08694	218.7	6.457	-0.2014
0.85	0	0	0.00128508	0.012093	8.74e-06	1.12e-05	0.00392204	0.00410517	1.10745e-05	3.45747e-05		(1,0,1)	-0.01611	-3.168	-0.314	-1.372	-109.8	-8.674	-0.9972
0.9	0	0	0.00124865	0.0127719	8.52e-06	1.23e-05	0.00395788	0.00416489	1.22742e-05	3.45369e-05		(0,2,0)	-0.005753	0.3037	0.04332	0.006905	3.665	0.6468	-6.97e-05
0.95	0	0	0.00121384	0.013368	8.29e-06	1.34e-05	0.00399497	0.0042267	1.33585e-05	3.44808e-05		(0,1,1)	1	1	1	1	1	1	1
1	0	0	0.0011912	0.0138701	8.09e-06	1.43e-05	0.00402685	0.00434101	1.43001e-05	3.46212e-05		(0,0,2)	-3.994e-05	-0.02932	-0.002355	-0.006269	-0.2429	-0.01875	0.007268
1.1	0	0	0.00114331	0.0147534	7.66e-06	1.6e-05	0.0040964	0.0046036	1.59824e-05	3.48069e-05		(3,0,0)	0.241	-8.483	-5.236	-6.452	683.5	-43.68	-6.351
1.2	0	0	0.00110426	0.0154961	7.23e-06	1.74e-05	0.00416534	0.00482108	1.74204e-05	3.51001e-05		(2,1,0)	-0.08023	4.256	0.13	0.1962	-77.67	9.099	-0.3233
1.3	0	0	0.00106965	0.016146	6.8e-06	1.87e-05	0.0042355	0.00500835	1.86829e-05	3.54007e-05		(2,0,1)	0.01088	1.434	0.1612	0.8069	68.74	5.942	0.8985
1.4	0	0	0.00103613	0.0167273	6.34e-06	1.98e-05	0.00430891	0.0051727	1.97996e-05	3.56084e-05		(1,2,0)	0.01174	-0.4723	-0.06895	0.0002913	-6.459	-1.087	-0.01704
1.5	0	0	0.00100964	0.0172545	5.9e-06	2.08e-05	0.00438	0.00531996	2.08115e-05	3.59587e-05		(1,1,1)	1	1	1	1	1	1	1
1.6	0	0	0.000984033	0.0177401	5.45e-06	2.17e-05	0.00445342	0.00545314	2.17253e-05	3.62359e-05		(1,0,2)	3.376e-05	0.03544	0.002595	0.006546	0.3053	0.01915	-0.01405
1.7	0	0	0.00096224	0.0181943	4.99e-06	2.26e-05	0.00452603	0.00557618	2.2572e-05	3.65625e-05		(0,3,0)	-8.532e-05	0.0006047	0.000119	-0.0002607	0.02467	0.003053	0.0004925
1.8	0	0	0.000941205	0.0186193	4.53e-06	2.33e-05	0.00460043	0.00568928	2.33441e-05	3.68303e-05		(0,2,1)	1	1	1	1	1	1	1
1.9	0	0	0.000920848	0.0190184	4.06e-06	2.4e-05	0.00467659	0.00579352	2.40467e-05	3.70435e-05		(0,1,2)	1	1	1	1	1	1	1
2	0	0	0.000904026	0.0194013	3.6e-06	2.47e-05	0.00475095	0.00589272	2.47166e-05	3.73245e-05		(0,0,3)	3.389e-07	0.0001561	1.391e-05	3.424e-05	0.0001891	9.42e-05	-1.255e-05
1.2	0	-4	0.00155916	0.00390358	9.27e-06	1.1e-05	0.00383782	0.00396479	1.17146e-06	3.9342e-05		(4,0,0)	-0.00124	1.406	0.5253	1.471	41.77	16	2.413
1.3	0	-4	0.00151794	0.00668687	8.97e-06	1.11e-05	0.00388583	0.00404482	3.40807e-06	3.90472e-05		(3,1,0)	0.05521	-2.407	-0.229	-0.0558	-2.911	-5.867	0.1983
1.4	0	-4	0.00143923	0.00902842	8.44e-06	1.14e-05	0.0039703	0.00418559	6.11998e-06	3.73137e-05		(3,0,1)	-0.00251	-0.1016	-0.01785	-0.1415	-13.66	-1.265	-0.2938
1.1	0	-3	0.0015145	0.00728302	9.18e-06	1.1e-05	0.00385142	0.00398746	4.06784e-06	3.72006e-05		(2,2,0)	-0.005539	0.1705	0.02532	-0.006958	2.559	0.4294	0.007524
1.2	0	-3	0.0014077	0.00982715	8.59e-06	1.13e-05	0.00394686	0.00414653	7.28098e-06	3.71332e-05		(2,1,1)	1	1	1	1	1	1	1
1.3	0	-3	0.00133494	0.0114234	8.08e-06	1.15e-05	0.00402858	0.00428272	9.69692e-06	3.6226e-05		(2,0,2)	-3.506e-06	-0.008918	-0.0004581	-0.001092	-0.08376	-0.003107	0.005957
1.4	0	-3	0.00128873	0.0125542	7.66e-06	1.17e-05	0.00409672	0.00439629	1.1572e-05	3.5194e-05		(1,3,0)	6.265e-05	0.0001782	1.135e-05	0.000333	-0.007081	-0.001142	-8.651e-05
0.9	0	-2	0.001563	0.00571426	9.57e-06	1.09e-05	0.00378813	0.00388198	2.53284e-06	3.97606e-05		(1,2,1)	1	1	1	1	1	1	1
1	0	-2	0.00143545	0.00924457	9e-06	1.11e-05	0.0038803	0.00403559	6.5203e-06	3.6347e-05		(1,1,2)	1	1	1	1	1	1	1
1.1	0	-2	0.00133824	0.0114422	8.46e-06	1.14e-05	0.00396775	0.00418135	9.8343e-06	3.59794e-05		(1,0,3)	-1.832e-07	-0.0001069	-9.361e-06	-2.11e-05	-0.0002788	-6.736e-05	6.985e-06
1.2	0	-2	0.00127002	0.0127405	7.97e-06	1.2e-05	0.004046	0.00431175	1.2025e-05	3.54225e-05		(0,4,0)	4.934e-08	-1.195e-05	-1.913e-06	-2.324e-06	-0.0002139	-2.244e-05	-5.081e-06
1.3	0	-2	0.00122054	0.0136836	7.53e-06	1.37e-05	0.00411781	0.00443144	1.3697e-05	3.53025e-05		(0,3,1)	1	1	1	1	1	1	1
1.4	0	-2	0.00123599	0.0143657	7.38e-06	1.5e-05	0.00414102	0.00447403	1.50353e-05	3.48428e-05		(0,2,2)	1	1	1	1	1	1	1
0.8	0	-1	0.00156172	0.00502021	9.67e-06	1.08e-05	0.0037731	0.00385693	1.96024e-06	3.89508e-05		(0,1,3)	1	1	1	1	1	1	1
0.9	0	-1	0.00142081	0.0100304	9.1e-06	1.11e-05	0.00386491	0.00400995	7.69708e-06	3.74759e-05		(0,0,4)	-8.503e-10	-2.292e-07	-2.104e-08	-5.691e-08	1.378e-06	-7.358e-08	7.486e-08
1	0	-1	0.00130159	0.0120949	8.5e-06	1.13e-05	0.00396061	0.00416945	1.10022e-05	3.57344e-05
1.1	0	-1	0.0012339	0.0134406	8.03e-06	1.34e-05	0.00403661	0.00429611	1.34049e-05	3.51982e-05
1.2	0	-1	0.00118477	0.0143168	7.59e-06	1.5e-05	0.00410738	0.00446524	1.50214e-05	3.52631e-05
1.3	0	-1	0.00114815	0.0150529	7.18e-06	1.64e-05	0.00417427	0.00468141	1.64126e-05	3.55572e-05
1.4	0	-1	0.00110834	0.0157144	6.72e-06	1.77e-05	0.00424825	0.00487184	1.76583e-05	3.56313e-05
0.8	0	0	0.00142441	0.00984736	9.26e-06	1.1e-05	0.00383901	0.00396677	7.4533e-06	3.76863e-05
0.9	0	0	0.00129083	0.0121973	8.66e-06	1.13e-05	0.0039351	0.00412693	1.12402e-05	3.60502e-05
1	0	0	0.00121734	0.0137762	8.19e-06	1.41e-05	0.00401116	0.00431453	1.41461e-05	3.50553e-05
1.1	0	0	0.00117956	0.0146635	7.81e-06	1.59e-05	0.00407248	0.00458026	1.58547e-05	3.52531e-05
1.2	0	0	0.00111735	0.0154547	7.29e-06	1.74e-05	0.00415591	0.00481013	1.7356e-05	3.54434e-05
1.3	0	0	0.00107946	0.0161102	6.85e-06	1.86e-05	0.00422785	0.00499886	1.86248e-05	3.56745e-05
1.4	0	0	0.00105038	0.0166904	6.42e-06	1.98e-05	0.00429693	0.00516385	1.97529e-05	3.60448e-05
0.7	0	1	0.00151278	0.00829163	9.64e-06	1.08e-05	0.00377794	0.00386499	5.34276e-06	4.08668e-05
0.8	0	1	0.00133444	0.0116812	8.99e-06	1.11e-05	0.00388219	0.00403875	1.04069e-05	3.71211e-05
0.9	0	1	0.00120812	0.0137575	8.39e-06	1.42e-05	0.00397976	0.00431459	1.41865e-05	3.53822e-05
1	0	1	0.00117917	0.0148386	8.05e-06	1.63e-05	0.00403406	0.00464264	1.63458e-05	3.51593e-05
1.1	0	1	0.00110276	0.015652	7.5e-06	1.79e-05	0.00412317	0.00487837	1.79043e-05	3.55256e-05
1.2	0	1	0.00106434	0.0163298	7.05e-06	1.92e-05	0.00419408	0.00507427	1.92488e-05	3.583e-05
1.3	0	1	0.00103104	0.0169328	6.61e-06	2.04e-05	0.00426562	0.00524575	2.04412e-05	3.61661e-05
1.4	0	1	0.00100113	0.0174833	6.16e-06	2.15e-05	0.0043383	0.00539983	2.15204e-05	3.64699e-05
0.7	0	2	0.00139724	0.0106036	9.34e-06	1.1e-05	0.00382647	0.00394587	8.66158e-06	3.91946e-05
0.8	0	2	0.00124625	0.0131542	8.73e-06	1.31e-05	0.00392452	0.00413539	1.30976e-05	3.61997e-05
0.9	0	2	0.00115136	0.0148451	8.19e-06	1.64e-05	0.00401041	0.00464946	1.64287e-05	3.5341e-05
1	0	2	0.00118289	0.0156067	8.06e-06	1.81e-05	0.00403183	0.00488344	1.8089e-05	3.55218e-05
1.1	0	2	0.00105201	0.0164377	7.29e-06	1.96e-05	0.00415667	0.00511591	1.96315e-05	3.57833e-05
1.2	0	2	0.00101832	0.0170545	6.85e-06	2.09e-05	0.00422722	0.00529202	2.08746e-05	3.62094e-05
1.3	0	2	0.000984835	0.017632	6.39e-06	2.2e-05	0.00430166	0.00545411	2.20267e-05	3.64945e-05
1.4	0	2	0.000959137	0.0181616	5.94e-06	2.31e-05	0.00437358	0.00560113	2.30826e-05	3.69114e-05
0.7	0	3	0.0013207	0.0119191	9.14e-06	1.11e-05	0.00385861	0.00399944	1.08809e-05	3.86169e-05
0.8	0	3	0.00121572	0.0143367	8.64e-06	1.55e-05	0.00393918	0.00450426	1.55178e-05	3.56311e-05
0.9	0	3	0.00109608	0.0156102	8.01e-06	1.81e-05	0.00404026	0.00488278	1.80704e-05	3.53299e-05
1	0	3	0.00123618	0.0162212	8.26e-06	1.97e-05	0.00399986	0.00508278	1.96523e-05	3.58429e-05
1.1	0	3	0.00131977	0.0167688	8.38e-06	2.11e-05	0.00397994	0.00525896	2.1076e-05	3.62161e-05
1.2	0	3	0.000978233	0.0176843	6.67e-06	2.23e-05	0.00425608	0.00548076	2.23327e-05	3.65847e-05
1.3	0	3	0.00094901	0.0182433	6.21e-06	2.35e-05	0.0043296	0.00563662	2.34673e-05	3.69861e-05
1.4	0	3	0.000923722	0.0187517	5.76e-06	2.45e-05	0.00440332	0.00577598	2.44818e-05	3.73906e-05
0.7	0	4	0.00124305	0.013106	8.93e-06	1.31e-05	0.00389122	0.00412629	1.30793e-05	3.79516e-05
0.8	0	4	0.00123706	0.0151998	8.7e-06	1.75e-05	0.00392894	0.00477756	1.74742e-05	3.55912e-05
0.9	0	4	0.0010577	0.0162023	7.88e-06	1.94e-05	0.00406099	0.00506341	1.9396e-05	3.57156e-05
1	0	4	0.0013525	0.0166833	8.69e-06	2.1e-05	0.00393007	0.00524359	2.10474e-05	3.61455e-05
1.1	0	4	0.000977733	0.0176233	6.98e-06	2.24e-05	0.00420568	0.00547351	2.23738e-05	3.66387e-05
1.2	0	4	0.000943528	0.0182332	6.52e-06	2.36e-05	0.00428107	0.00564493	2.36381e-05	3.69751e-05
1.3	0	4	0.000915419	0.0187673	6.05e-06	2.47e-05	0.0043558	0.00579218	2.4723e-05	3.73814e-05
1.4	0	4	0.000892117	0.0192606	5.59e-06	2.57e-05	0.00442987	0.00592625	2.57119e-05	3.78307e-05
0.7	0	5	0.00115768	0.0142453	8.71e-06	1.54e-05	0.00392708	0.0044779	1.53535e-05	3.69481e-05
0.8	0	5	0.00130467	0.0158257	8.9e-06	1.91e-05	0.00389648	0.00498142	1.9053e-05	3.56758e-05
0.9	0	5	0.0010228	0.0167582	7.76e-06	2.07e-05	0.00407983	0.0052329	2.06813e-05	3.60692e-05
1	0	5	0.00154227	0.0169906	9.4e-06	2.23e-05	0.0038162	0.00536719	2.22796e-05	3.64481e-05
1.1	0	5	0.000943369	0.0181212	6.84e-06	2.36e-05	0.00422837	0.00562274	2.35628e-05	3.69317e-05
1.2	0	5	0.000913942	0.0187118	6.38e-06	2.48e-05	0.00430237	0.00578794	2.4804e-05	3.73987e-05
1.3	0	5	0.000885608	0.0192187	5.91e-06	2.58e-05	0.00437906	0.00592578	2.58235e-05	3.77554e-05
1.4	0	5	0.000860964	0.0196883	5.43e-06	2.67e-05	0.00445604	0.00605134	2.6747e-05	3.81131e-05
0.7	0	6	0.00109927	0.0151187	8.56e-06	1.72e-05	0.00395161	0.00474733	1.72185e-05	3.64201e-05
0.8	0	6	0.00142596	0.0162367	9.26e-06	2.03e-05	0.00383827	0.00512397	2.02656e-05	3.58649e-05
0.9	0	6	0.000991352	0.0172703	7.66e-06	2.19e-05	0.00409682	0.00538885	2.1899e-05	3.64009e-05
1.1	0	6	0.000916954	0.0185815	6.73e-06	2.47e-05	0.0042458	0.00576132	2.47002e-05	3.73875e-05
1.2	0	6	0.000886799	0.0191274	6.26e-06	2.58e-05	0.00432191	0.00591166	2.58309e-05	3.7774e-05
1.3	0	6	0.000859538	0.0196174	5.78e-06	2.68e-05	0.00439939	0.00604362	2.68125e-05	3.81357e-05
1.4	0	6	0.000838572	0.0200919	5.31e-06	2.78e-05	0.00447485	0.00617063	2.77659e-05	3.86223e-05
0.7	0	7	0.00106273	0.0158241	8.46e-06	1.88e-05	0.00396696	0.00496549	1.88114e-05	3.63793e-05
0.9	0	7	0.000963181	0.0177218	7.56e-06	2.3e-05	0.00411203	0.00552612	2.29975e-05	3.67273e-05
1.1	0	7	0.000891852	0.0189872	6.63e-06	2.57e-05	0.00426237	0.00588299	2.57166e-05	3.77695e-05
1.2	0	7	0.000861828	0.0194937	6.15e-06	2.67e-05	0.00433989	0.00602038	2.67471e-05	3.81102e-05
1.3	0	7	0.00083729	0.0199832	5.67e-06	2.77e-05	0.00441674	0.0061519	2.77393e-05	3.85585e-05
0.7	0	8	0.0010317	0.0164294	8.38e-06	2.02e-05	0.00397999	0.00515249	2.02312e-05	3.63952e-05
0.9	0	8	0.000938088	0.0181136	7.48e-06	2.4e-05	0.00412558	0.00564501	2.39686e-05	3.70579e-05
1.1	0	8	0.000867593	0.0193367	6.53e-06	2.66e-05	0.00427838	0.00598726	2.65984e-05	3.80617e-05
1.2	0	8	0.000837742	0.0198177	6.04e-06	2.76e-05	0.00435724	0.00611602	2.75613e-05	3.83723e-05
0.7	0	9	0.0010091	0.0169317	8.32e-06	2.15e-05	0.00398948	0.00530784	2.14512e-05	3.66584e-05
0.9	0	9	0.000915838	0.0184574	7.41e-06	2.48e-05	0.00413759	0.0057492	2.48349e-05	3.73979e-05
1	0	9	0.00313366	0.016815	1.53e-05	2.61e-05	0.00286137	0.00555948	2.61173e-05	3.77856e-05
1.1	0	9	0.000845547	0.0196439	6.44e-06	2.74e-05	0.00429293	0.00607866	2.73813e-05	3.83342e-05
1.2	0	9	0.0008344	0.0202284	6.03e-06	2.87e-05	0.00435964	0.00624214	2.87036e-05	3.94861e-05
0.7	0	10	0.000988777	0.0173451	8.27e-06	2.25e-05	0.00399802	0.00543539	2.24773e-05	3.69628e-05
0.9	0	10	0.000890969	0.0187438	7.32e-06	2.56e-05	0.00415102	0.00583506	2.55515e-05	3.75401e-05
1.1	0	10	0.000835539	0.0199835	6.4e-06	2.83e-05	0.00429953	0.00618206	2.83041e-05	3.90616e-05
0.8	0	0	0.0014218	0.00987958	9.25e-06	1.1e-05	0.00384026	0.00396887	7.50046e-06	3.76182e-05
0.9	0	0	0.00128371	0.0122486	8.64e-06	1.13e-05	0.00393894	0.00413333	1.13272e-05	3.58453e-05
1	0	0	0.00121702	0.0137778	8.19e-06	1.41e-05	0.00401136	0.00431501	1.4149e-05	3.50446e-05
1.1	0	0	0.00121453	0.0145413	7.95e-06	1.57e-05	0.0040494	0.00454661	1.5655e-05	3.65361e-05
1.2	0	0	0.00119879	0.0152401	7.66e-06	1.71e-05	0.00409728	0.00475528	1.70516e-05	3.79258e-05
1.3	0	0	0.00119507	0.0158777	7.41e-06	1.84e-05	0.00413768	0.00494565	1.83777e-05	3.9302e-05
1.4	0	0	0.001192	0.016468	7.15e-06	1.96e-05	0.00417797	0.0051207	1.96309e-05	4.06212e-05
0.8	0.5	0	0.00144022	0.00942778	9.31e-06	1.1e-05	0.00383142	0.00395413	6.841e-06	3.77051e-05
0.9	0.5	0	0.00130026	0.0119599	8.69e-06	1.13e-05	0.00393001	0.00411844	1.08167e-05	3.59824e-05
1	0.5	0	0.00122706	0.0135595	8.23e-06	1.37e-05	0.00400533	0.00424776	1.37188e-05	3.50885e-05
1.1	0.5	0	0.0012143	0.0143907	7.95e-06	1.53e-05	0.00404955	0.00449951	1.53321e-05	3.62346e-05
1.2	0.5	0	0.00120036	0.0150839	7.66e-06	1.67e-05	0.00409615	0.00470676	1.67071e-05	3.76169e-05
1.3	0.5	0	0.00119664	0.0157213	7.41e-06	1.8e-05	0.00413645	0.00489719	1.80213e-05	3.89805e-05
1.4	0.5	0	0.00132246	0.0161419	7.84e-06	1.92e-05	0.00406839	0.00504292	1.92266e-05	3.95709e-05
0.8	1	0	0.00146046	0.00896636	9.37e-06	1.09e-05	0.0038217	0.00393793	6.19858e-06	3.78351e-05
0.9	1	0	0.00131811	0.0116958	8.75e-06	1.12e-05	0.00392037	0.00410238	1.03621e-05	3.61706e-05
1	1	0	0.00123692	0.0133592	8.26e-06	1.33e-05	0.00399942	0.00423412	1.33304e-05	3.5158e-05
1.1	1	0	0.00121428	0.0142609	7.95e-06	1.51e-05	0.00404956	0.00445893	1.50568e-05	3.59803e-05
1.2	1	0	0.00120171	0.01495	7.67e-06	1.64e-05	0.00409518	0.00466517	1.64146e-05	3.73551e-05
1.3	1	0	0.00119799	0.0155872	7.42e-06	1.77e-05	0.0041354	0.00485565	1.77185e-05	3.87082e-05
1.4	1	0	0.00131511	0.0160195	7.8e-06	1.89e-05	0.00407456	0.00500336	1.89156e-05	3.92969e-05
0.8	1.5	0	0.00147563	0.00859367	9.41e-06	1.09e-05	0.00381442	0.0039258	5.70146e-06	3.78854e-05
0.9	1.5	0	0.0013327	0.0115	8.8e-06	1.12e-05	0.00391249	0.00408925	1.00321e-05	3.63147e-05
1	1.5	0	0.0012433	0.0132023	8.29e-06	1.3e-05	0.00399559	0.00422774	1.30279e-05	3.51564e-05
1.1	1.5	0	0.00121437	0.0141543	7.95e-06	1.48e-05	0.0040495	0.00442561	1.48327e-05	3.57756e-05
1.2	1.5	0	0.00120281	0.0148407	7.67e-06	1.62e-05	0.00409439	0.00463123	1.61778e-05	3.71433e-05
1.3	1.5	0	0.00119909	0.0154778	7.42e-06	1.75e-05	0.00413454	0.00482172	1.74731e-05	3.84882e-05
1.4	1.5	0	0.00130948	0.015919	7.77e-06	1.87e-05	0.00407929	0.00497095	1.86635e-05	3.90755e-05
0.8	2	0	0.00149112	0.00823953	9.46e-06	1.09e-05	0.00380699	0.00391341	5.24826e-06	3.79989e-05
0.9	2	0	0.00134305	0.0113598	8.84e-06	1.12e-05	0.0039069	0.00407993	9.79875e-06	3.64025e-05
1	2	0	0.0012503	0.0130672	8.31e-06	1.28e-05	0.00399139	0.00422074	1.27722e-05	3.52206e-05
1.1	2	0	0.00121451	0.0140731	7.95e-06	1.47e-05	0.00404941	0.00440022	1.46631e-05	3.56223e-05
1.2	2	0	0.00120364	0.0147579	7.68e-06	1.6e-05	0.00409379	0.0046055	1.59994e-05	3.6984e-05
1.3	2	0	0.00119992	0.0153947	7.43e-06	1.73e-05	0.00413389	0.00479599	1.72881e-05	3.83225e-05
1.4	2	0	0.00130542	0.0158425	7.75e-06	1.85e-05	0.0040827	0.00494634	1.84735e-05	3.89088e-05
0.8	2.5	0	0.00150647	0.00790881	9.5e-06	1.09e-05	0.00379962	0.00390113	4.84183e-06	3.81818e-05
0.9	2.5	0	0.00134862	0.0112694	8.86e-06	1.12e-05	0.0039039	0.00407492	9.64852e-06	3.64255e-05
1	2.5	0	0.00125541	0.0129732	8.33e-06	1.26e-05	0.00398832	0.00421563	1.25959e-05	3.52764e-05
1.1	2.5	0	0.00121463	0.014019	7.95e-06	1.46e-05	0.00404933	0.00438332	1.45508e-05	3.55215e-05
1.2	2.5	0	0.00120419	0.014703	7.68e-06	1.59e-05	0.00409339	0.00458847	1.58818e-05	3.6879e-05
1.3	2.5	0	0.00120048	0.0153397	7.43e-06	1.72e-05	0.00413346	0.00477893	1.7166e-05	3.82134e-05
1.4	2.5	0	0.00130284	0.0157917	7.73e-06	1.83e-05	0.00408487	0.00493002	1.83482e-05	3.87991e-05
0.8	3	0	0.00150716	0.00785489	9.51e-06	1.09e-05	0.00379929	0.00390058	4.77631e-06	3.81296e-05
0.9	3	0	0.00135371	0.0112081	8.87e-06	1.12e-05	0.00390114	0.00407034	9.54851e-06	3.65025e-05
1	3	0	0.00125567	0.0129432	8.33e-06	1.25e-05	0.00398817	0.00421537	1.25382e-05	3.52351e-05
1.1	3	0	0.0012147	0.0139934	7.95e-06	1.45e-05	0.00404929	0.00437532	1.44978e-05	3.54743e-05
1.2	3	0	0.00120445	0.0146771	7.68e-06	1.58e-05	0.0040932	0.0045804	1.58263e-05	3.68295e-05
1.3	3	0	0.00120074	0.0153137	7.43e-06	1.71e-05	0.00413325	0.00477088	1.71085e-05	3.81621e-05
1.4	3	0	0.00130164	0.0157676	7.73e-06	1.83e-05	0.00408587	0.00492228	1.8289e-05	3.87473e-05
0.8	3.5	0	0.00150706	0.00786224	9.51e-06	1.09e-05	0.00379934	0.00390065	4.78522e-06	3.81366e-05
1.4	0	-4	0.00143636	0.00907062	8.43e-06	1.14e-05	0.00397271	0.00418961	6.17468e-06	3.72296e-05
1.3	0	-3	0.00133895	0.0113823	8.1e-06	1.15e-05	0.00402545	0.00427752	9.63261e-06	3.63458e-05
1.4	0	-3	0.00128839	0.0125571	7.66e-06	1.17e-05	0.004097	0.00439677	1.15769e-05	3.51827e-05
1.3	0	-2	0.00122018	0.0136855	7.53e-06	1.37e-05	0.00411809	0.00443191	1.37001e-05	3.52921e-05
1.4	0	-2	0.0012136	0.0142934	7.27e-06	1.48e-05	0.00415983	0.00450147	1.48357e-05	3.63561e-05
1.3	0	-1	0.00120536	0.0148541	7.45e-06	1.61e-05	0.00412965	0.00462841	1.61072e-05	3.72711e-05
1.4	0	-1	0.00128317	0.0153384	7.63e-06	1.73e-05	0.00410139	0.00478511	1.72599e-05	3.78507e-05
1.3	0	0	0.00119507	0.0158777	7.41e-06	1.84e-05	0.00413768	0.00494565	1.83777e-05	3.9302e-05
1.4	0	0	0.001192	0.016468	7.15e-06	1.96e-05	0.00417797	0.0051207	1.96309e-05	4.06212e-05
1.3	0	1	0.00118599	0.0167963	7.36e-06	2.05e-05	0.00414476	0.00523018	2.05401e-05	4.12833e-05
1.4	0	1	0.00118308	0.0173896	7.11e-06	2.19e-05	0.00418547	0.00540556	2.18611e-05	4.26793e-05
1.3	0	2	0.00117814	0.017626	7.32e-06	2.26e-05	0.00415088	0.00548713	2.25955e-05	4.32184e-05
1.4	0	2	0.00117538	0.0182264	7.07e-06	2.4e-05	0.00419193	0.00566412	2.39886e-05	4.46845e-05

## Sheet: （17，25.4）
																					whole potentials of the equilibrium droplet		the unit length energy barrier
0	0	0	0.00181392	0	1.03e-05	1.03e-05	0.00362783	0.00362783	0	4.1347e-05		(0,0,0)	-5.107	0.9964	1.255	1	-2295	-65.07	25.37		2.85e-06		5.6e-06
0.2	0	0	0.00170434	0.00493247	1.03e-05	1.04e-05	0.00364098	0.00364975	1.93139e-06	3.98329e-05		(1,0,0)	3.367	4.097	1.526	-0.0004069	5172	223.1	16.35
0.4	0	0	0.00160006	0.00653859	1.01e-05	1.05e-05	0.00367916	0.00371337	3.37033e-06	3.85236e-05		(0,1,0)	0.2396	-4.325	-0.6316	5.278e-05	-142.2	-16.06	0.04788
0.6	0	0	0.00149579	0.00764059	9.79e-06	1.07e-05	0.00374236	0.00381871	4.54937e-06	3.73501e-05		(0,0,1)	0.08504	1.833	0.2506	1	57.05	4.219	0.04686
0.7	0	0	0.00146042	0.00839037	9.63e-06	1.08e-05	0.0037763	0.00387528	5.45235e-06	3.63815e-05		(2,0,0)	6.686	11.88	2.82	1	-3535	-155.1	7.003
0.75	0	0	0.00139202	0.0100082	9.44e-06	1.09e-05	0.00381769	0.00394426	7.6999e-06	3.55302e-05		(1,1,0)	-0.04478	2.036	0.2713	-1.003e-05	218.9	18.28	-0.2559
0.85	0	0	0.00128487	0.0120901	9.06e-06	1.11e-05	0.00389765	0.00407752	1.10759e-05	3.45791e-05		(1,0,1)	-0.07431	-3.172	-0.5064	-9.096e-08	-110	-9.935	-1.465
0.9	0	0	0.00124844	0.0127686	8.89e-06	1.23e-05	0.00393319	0.00413676	1.22755e-05	3.45408e-05		(0,2,0)	-0.008643	0.3054	0.04587	1	3.671	0.6626	0.02402
0.95	0	0	0.00121364	0.0133644	8.71e-06	1.34e-05	0.00396999	0.00419809	1.33598e-05	3.44842e-05		(0,1,1)	1	1	1	1	1	1	1
1	0	0	0.001191	0.0138662	8.56e-06	1.43e-05	0.00400158	0.00434048	1.43014e-05	3.46242e-05		(0,0,2)	0.000243	-0.02929	-0.002502	1	-0.2431	-0.0005385	0.02986
1.1	0	0	0.00114312	0.0147488	8.23e-06	1.6e-05	0.00407056	0.00460293	1.59834e-05	3.48091e-05		(3,0,0)	-2.305	-8.512	-2.612	-2.547e-08	686.4	6.364	-20.27
1.2	0	0	0.00110407	0.0154907	7.91e-06	1.74e-05	0.00413892	0.00482027	1.7421e-05	3.51013e-05		(2,1,0)	-0.1849	4.307	0.6129	0.1958	-77.7	0.5317	0.5877
1.3	0	0	0.00106947	0.01614	7.58e-06	1.87e-05	0.0042085	0.00500742	1.86832e-05	3.54012e-05		(2,0,1)	-0.01535	1.439	0.3019	0.8079	68.93	7.622	2.297
1.4	0	0	0.00103595	0.0167208	7.23e-06	1.98e-05	0.00428132	0.00517166	1.97996e-05	3.56084e-05		(1,2,0)	-0.005052	-0.4747	-0.06577	0.0005268	-6.464	-1.083	-0.06603
1.5	0	0	0.00100947	0.0172474	6.9e-06	2.08e-05	0.00435183	0.00531879	2.08111e-05	3.59581e-05		(1,1,1)	1	1	1	1	1	1	1
1.6	0	0	0.000983868	0.0177324	6.55e-06	2.17e-05	0.00442468	0.00545187	2.17246e-05	3.62347e-05		(1,0,2)	-0.0008259	0.0354	0.002638	0.00656	0.3054	-0.006698	-0.04331
1.7	0	0	0.000962078	0.018186	6.21e-06	2.26e-05	0.00449671	0.00557479	2.25709e-05	3.65607e-05		(0,3,0)	0.0004949	0.0006015	-5.624e-05	-0.0002618	0.02458	0.002442	0.0007876
1.8	0	0	0.000941047	0.0186105	5.86e-06	2.33e-05	0.00457053	0.00568779	2.33427e-05	3.6828e-05		(0,2,1)	1	1	1	1	1	1	1
1.9	0	0	0.000920694	0.019009	5.5e-06	2.4e-05	0.0046461	0.00579191	2.40449e-05	3.70407e-05		(0,1,2)	1	1	1	1	1	1	1
2	0	0	0.000903874	0.0193914	5.15e-06	2.47e-05	0.00471988	0.00589103	2.47146e-05	3.73214e-05		(0,0,3)	7.802e-06	0.0001561	1.539e-05	3.429e-05	0.0001904	-7.102e-06	-0.000168
1.2	0	-4	0.0015589	0.00390176	9.46e-06	1.09e-05	0.00381145	0.00393385	1.1716e-06	3.93469e-05		(4,0,0)	0.02788	1.418	0.5639	1.472	41.86	12.44	7.941
1.3	0	-4	0.00151769	0.00668353	9.24e-06	1.1e-05	0.00385889	0.00401293	3.40843e-06	3.90513e-05		(3,1,0)	0.04133	-2.426	-0.3334	-0.05527	-2.9	-3.678	-0.2147
1.4	0	-4	0.00143899	0.0090239	8.84e-06	1.12e-05	0.00394277	0.00415273	6.12069e-06	3.7318e-05		(3,0,1)	0.0179	-0.103	-0.05263	-0.1417	-13.7	-1.87	-0.896
1.1	0	-3	0.00151425	0.00728014	9.4e-06	1.09e-05	0.00382561	0.00395747	4.06843e-06	3.72059e-05		(2,2,0)	0.0103	0.1713	0.0229	-0.007079	2.558	0.4126	0.0211
1.2	0	-3	0.00140747	0.00982305	8.95e-06	1.12e-05	0.00392047	0.00411557	7.28175e-06	3.71371e-05		(2,1,1)	1	1	1	1	1	1	1
1.3	0	-3	0.00133471	0.0114185	8.56e-06	1.14e-05	0.00400161	0.00425079	9.6979e-06	3.62296e-05		(2,0,2)	0.0003796	-0.008897	-0.0004069	-0.001095	-0.0837	0.006596	0.01604
1.4	0	-3	0.00128851	0.0125486	8.24e-06	1.16e-05	0.00406917	0.00436339	1.15732e-05	3.51976e-05		(1,3,0)	-0.0004203	0.0001846	5.278e-05	0.0003342	-0.00695	-0.0004642	0.0001866
0.9	0	-2	0.00156273	0.00571227	9.69e-06	1.07e-05	0.00376347	0.00385389	2.53308e-06	3.97643e-05		(1,2,1)	1	1	1	1	1	1	1
1	0	-2	0.00143521	0.00924151	9.26e-06	1.1e-05	0.00385505	0.00400653	6.52121e-06	3.63521e-05		(1,1,2)	1	1	1	1	1	1	1
1.1	0	-2	0.00133801	0.0114381	8.85e-06	1.12e-05	0.00394193	0.00415133	9.83533e-06	3.59832e-05		(1,0,3)	-4.057e-06	-0.0001069	-1.003e-05	-2.114e-05	-0.0002799	1.921e-05	0.0001325
1.2	0	-2	0.0012698	0.0127358	8.48e-06	1.2e-05	0.00401959	0.00428076	1.20261e-05	3.54258e-05		(0,4,0)	4.086e-07	-1.202e-05	-9.096e-08	-2.325e-06	-0.0002152	-2.621e-05	-1.38e-05
1.3	0	-2	0.00122034	0.0136781	8.14e-06	1.37e-05	0.00409082	0.00439948	1.3698e-05	3.53051e-05		(0,3,1)	1	1	1	1	1	1	1
1.4	0	-2	0.00123578	0.0143593	8.03e-06	1.5e-05	0.00411347	0.0044731	1.50363e-05	3.48452e-05		(0,2,2)	1	1	1	1	1	1	1
0.8	0	-1	0.00156146	0.00501874	9.76e-06	1.07e-05	0.00374901	0.0038298	1.96048e-06	3.89556e-05		(0,1,3)	1	1	1	1	1	1	1
0.9	0	-1	0.00142057	0.0100272	9.33e-06	1.09e-05	0.00384024	0.00398184	7.69777e-06	3.74793e-05		(0,0,4)	-3.042e-08	-2.29e-07	-2.547e-08	-5.693e-08	1.379e-06	-2.417e-08	2.12e-07
1	0	-1	0.00130138	0.0120911	8.88e-06	1.12e-05	0.00393535	0.00414037	1.10032e-05	3.57378e-05
1.1	0	-1	0.0012337	0.0134361	8.52e-06	1.34e-05	0.00401078	0.00426607	1.3406e-05	3.5201e-05
1.2	0	-1	0.00118457	0.0143116	8.18e-06	1.5e-05	0.00408096	0.00446448	1.50223e-05	3.52652e-05
1.3	0	-1	0.00114796	0.0150471	7.87e-06	1.64e-05	0.00414728	0.00468053	1.64133e-05	3.55585e-05
1.4	0	-1	0.00110815	0.0157079	7.52e-06	1.77e-05	0.00422068	0.00487083	1.76586e-05	3.5632e-05
0.8	0	0	0.00142417	0.00984465	9.45e-06	1.09e-05	0.00381491	0.00393963	7.45397e-06	3.76897e-05
0.9	0	0	0.00129061	0.0121939	8.99e-06	1.12e-05	0.00391042	0.0040988	1.12412e-05	3.60533e-05
1	0	0	0.00121713	0.013772	8.64e-06	1.41e-05	0.0039859	0.00431395	1.41471e-05	3.5058e-05
1.1	0	0	0.00117937	0.0146586	8.35e-06	1.59e-05	0.00404663	0.00457954	1.58555e-05	3.52549e-05
1.2	0	0	0.00111717	0.0154493	7.95e-06	1.74e-05	0.00412949	0.00480931	1.73566e-05	3.54445e-05
1.3	0	0	0.00107928	0.0161041	7.62e-06	1.86e-05	0.00420085	0.00499791	1.8625e-05	3.56749e-05
1.4	0	0	0.0010502	0.0166837	7.29e-06	1.98e-05	0.00426935	0.00516277	1.97527e-05	3.60445e-05
0.7	0	1	0.00151253	0.00828928	9.74e-06	1.07e-05	0.00375442	0.0038388	5.34293e-06	4.08681e-05
0.8	0	1	0.00133422	0.0116781	9.24e-06	1.1e-05	0.00385809	0.00401159	1.04076e-05	3.71237e-05
0.9	0	1	0.00120791	0.0137538	8.78e-06	1.42e-05	0.00395507	0.00431407	1.41874e-05	3.53845e-05
1	0	1	0.00117897	0.0148341	8.53e-06	1.63e-05	0.0040088	0.00464199	1.63466e-05	3.5161e-05
1.1	0	1	0.00110257	0.015647	8.11e-06	1.79e-05	0.00409732	0.0048776	1.79047e-05	3.55264e-05
1.2	0	1	0.00106416	0.0163242	7.77e-06	1.92e-05	0.00416765	0.00507336	1.92488e-05	3.583e-05
1.3	0	1	0.00103087	0.0169265	7.44e-06	2.04e-05	0.00423861	0.00524472	2.04408e-05	3.61654e-05
1.4	0	1	0.00100096	0.0174764	7.09e-06	2.15e-05	0.00431072	0.00539868	2.15196e-05	3.64687e-05
0.7	0	2	0.001397	0.0106009	9.51e-06	1.08e-05	0.00380293	0.00391967	8.66191e-06	3.91961e-05
0.8	0	2	0.00124604	0.0131509	9.04e-06	1.31e-05	0.00390041	0.00413494	1.30984e-05	3.62018e-05
0.9	0	2	0.00115116	0.0148411	8.64e-06	1.64e-05	0.00398572	0.00464888	1.64294e-05	3.53425e-05
1	0	2	0.00118269	0.0156017	8.54e-06	1.81e-05	0.00400657	0.00488268	1.80894e-05	3.55224e-05
1.1	0	2	0.00105183	0.0164325	7.95e-06	1.96e-05	0.00413081	0.00511509	1.96315e-05	3.57832e-05
1.2	0	2	0.00101815	0.0170487	7.62e-06	2.09e-05	0.00420078	0.00529106	2.08741e-05	3.62085e-05
1.3	0	2	0.00098467	0.0176256	7.27e-06	2.2e-05	0.00427464	0.00545303	2.20258e-05	3.6493e-05
1.4	0	2	0.000958976	0.0181545	6.93e-06	2.31e-05	0.00434598	0.00559991	2.30812e-05	3.69091e-05
0.7	0	3	0.00132048	0.0119161	9.35e-06	1.09e-05	0.00383507	0.00397324	1.08811e-05	3.86178e-05
0.8	0	3	0.00121552	0.0143332	8.97e-06	1.55e-05	0.00391506	0.00450374	1.55185e-05	3.56327e-05
0.9	0	3	0.0010959	0.0156062	8.5e-06	1.81e-05	0.00401556	0.00488217	1.80709e-05	3.53307e-05
1	0	3	0.00123598	0.0162156	8.69e-06	1.97e-05	0.0039746	0.00508188	1.96522e-05	3.58426e-05
1.1	0	3	0.00131955	0.0167619	8.79e-06	2.11e-05	0.00395411	0.00525782	2.10755e-05	3.62151e-05
1.2	0	3	0.000978069	0.0176783	7.48e-06	2.23e-05	0.00422964	0.00547974	2.23317e-05	3.6583e-05
1.3	0	3	0.000948851	0.0182367	7.13e-06	2.35e-05	0.00430258	0.00563548	2.34658e-05	3.69837e-05
1.4	0	3	0.000923567	0.0187444	6.79e-06	2.45e-05	0.00437572	0.0057747	2.44797e-05	3.73875e-05
0.7	0	4	0.00124284	0.013103	9.2e-06	1.31e-05	0.00386768	0.00412583	1.30796e-05	3.79524e-05
0.8	0	4	0.00123685	0.0151958	9.02e-06	1.75e-05	0.00390482	0.00477695	1.74746e-05	3.55921e-05
0.9	0	4	0.00105752	0.016198	8.4e-06	1.94e-05	0.00403628	0.00506273	1.9396e-05	3.57156e-05
1	0	4	0.00135227	0.0166768	9.02e-06	2.1e-05	0.00390482	0.00524253	2.10469e-05	3.61446e-05
1.1	0	4	0.000977569	0.0176177	7.72e-06	2.24e-05	0.00417982	0.00547256	2.23727e-05	3.66369e-05
1.2	0	4	0.000943369	0.018227	7.36e-06	2.36e-05	0.00425462	0.00564385	2.36365e-05	3.69727e-05
1.3	0	4	0.000915266	0.0187605	7.01e-06	2.47e-05	0.00432878	0.00579098	2.47209e-05	3.73783e-05
1.4	0	4	0.000891967	0.0192532	6.66e-06	2.57e-05	0.00440227	0.00592493	2.57093e-05	3.78269e-05
0.7	0	5	0.00115749	0.0142422	9.03e-06	1.54e-05	0.00390353	0.00447743	1.53538e-05	3.69487e-05
0.8	0	5	0.00130445	0.0158212	9.18e-06	1.91e-05	0.00387237	0.00498071	1.90532e-05	3.5676e-05
0.9	0	5	0.00102263	0.0167538	8.31e-06	2.07e-05	0.00405512	0.00523218	2.06809e-05	3.60684e-05
1	0	5	0.00154202	0.0169828	9.56e-06	2.23e-05	0.00379097	0.00536589	2.22786e-05	3.64465e-05
1.1	0	5	0.00094321	0.0181155	7.61e-06	2.36e-05	0.0042025	0.00562175	2.35613e-05	3.69293e-05
1.2	0	5	0.000913789	0.0187055	7.26e-06	2.48e-05	0.00427592	0.00578682	2.4802e-05	3.73955e-05
1.3	0	5	0.00088546	0.0192118	6.9e-06	2.58e-05	0.00435203	0.00592455	2.5821e-05	3.77517e-05
1.4	0	5	0.00086082	0.0196809	6.53e-06	2.67e-05	0.00442843	0.00604998	2.67439e-05	3.81087e-05
0.7	0	6	0.00109908	0.0151155	8.91e-06	1.72e-05	0.00392806	0.00474684	1.72187e-05	3.64204e-05
0.8	0	6	0.00142572	0.0162314	9.45e-06	2.03e-05	0.00381417	0.00512312	2.02654e-05	3.58646e-05
0.9	0	6	0.000991185	0.0172657	8.23e-06	2.19e-05	0.00407211	0.00538807	2.18981e-05	3.63994e-05
1.1	0	6	0.0009168	0.0185757	7.52e-06	2.47e-05	0.00421993	0.00576028	2.46982e-05	3.73844e-05
1.2	0	6	0.00088665	0.0191209	7.17e-06	2.58e-05	0.00429546	0.00591049	2.58283e-05	3.77702e-05
1.3	0	6	0.000859393	0.0196104	6.8e-06	2.68e-05	0.00437236	0.00604234	2.68094e-05	3.81312e-05
1.4	0	6	0.000838431	0.0200844	6.45e-06	2.78e-05	0.00444724	0.00616924	2.77623e-05	3.86172e-05
0.7	0	7	0.00106255	0.0158207	8.84e-06	1.88e-05	0.00394341	0.00496495	1.88112e-05	3.63789e-05
0.9	0	7	0.000963019	0.0177171	8.15e-06	2.3e-05	0.00408732	0.00552529	2.29962e-05	3.67253e-05
1.1	0	7	0.000891703	0.0189812	7.45e-06	2.57e-05	0.00423649	0.00588189	2.5714e-05	3.77656e-05
1.2	0	7	0.000861684	0.0194872	7.08e-06	2.67e-05	0.00431344	0.00601917	2.6744e-05	3.81057e-05
1.3	0	7	0.00083715	0.0199761	6.72e-06	2.77e-05	0.00438971	0.00615058	2.77358e-05	3.85536e-05
1.4	0	7	0.000836187	0.0205594	6.44e-06	2.91e-05	0.00444912	0.00631466	2.90817e-05	3.99407e-05
0.7	0	8	0.00103152	0.0164259	8.78e-06	2.02e-05	0.00395644	0.00515191	2.02307e-05	3.63943e-05
0.9	0	8	0.000937931	0.0181087	8.09e-06	2.4e-05	0.00410086	0.00564414	2.39669e-05	3.70553e-05
1.1	0	8	0.000867447	0.0193306	7.37e-06	2.66e-05	0.0042525	0.00598613	2.65954e-05	3.80575e-05
1.2	0	8	0.000837602	0.0198111	7e-06	2.76e-05	0.00433078	0.00611479	2.75579e-05	3.83674e-05
1.3	0	8	0.000834987	0.0204212	6.71e-06	2.9e-05	0.0043914	0.00628719	2.89772e-05	3.97986e-05
1.4	0	8	0.000834111	0.0210124	6.43e-06	3.04e-05	0.00445087	0.00645333	3.03683e-05	4.12299e-05
0.7	0	9	0.00100893	0.0169281	8.73e-06	2.15e-05	0.00396593	0.0053072	2.14503e-05	3.66569e-05
0.9	0	9	0.000915684	0.0184525	8.03e-06	2.48e-05	0.00411288	0.0057483	2.48328e-05	3.73947e-05
1	0	9	0.00313313	0.0167979	1.41e-05	2.61e-05	0.0028363	0.00555661	2.61146e-05	3.77817e-05
1.1	0	9	0.000845405	0.0196377	7.3e-06	2.74e-05	0.00426705	0.0060775	2.73779e-05	3.83294e-05
1.2	0	9	0.00083426	0.0202214	6.99e-06	2.87e-05	0.00433318	0.0062408	2.86992e-05	3.948e-05
1.3	0	9	0.000832972	0.0208474	6.7e-06	3.02e-05	0.00439297	0.00641799	3.01912e-05	4.10136e-05
1.4	0	9	0.00796534	0.0104522	3.49e-05	3.15e-05	-0.00153936	0.00483077	3.15148e-05	4.11315e-05
0.7	0	10	0.000988611	0.0173413	8.69e-06	2.25e-05	0.00397446	0.00543472	2.24761e-05	3.69608e-05
0.9	0	10	0.000890819	0.0187388	7.97e-06	2.55e-05	0.0041263	0.00583413	2.55491e-05	3.75366e-05
1.1	0	10	0.000835399	0.0199772	7.27e-06	2.83e-05	0.00427365	0.00618083	2.83001e-05	3.9056e-05
1.2	0	10	0.00083233	0.020622	6.98e-06	2.98e-05	0.00433457	0.00636406	2.98404e-05	4.06222e-05
1.3	0	10	0.000831083	0.0212566	6.7e-06	3.14e-05	0.00439444	0.00654357	3.13801e-05	4.22008e-05
1.4	0	10	0.00083035	0.0218622	6.41e-06	3.29e-05	0.00445403	0.00671346	3.28567e-05	4.37173e-05
0.8	0	0	0.00142156	0.00987687	9.44e-06	1.09e-05	0.00381616	0.00394172	7.50114e-06	3.76216e-05
0.9	0	0	0.00128349	0.0122452	8.98e-06	1.13e-05	0.00391426	0.00410521	1.13282e-05	3.58486e-05
1	0	0	0.00121681	0.0137737	8.64e-06	1.42e-05	0.00398609	0.00431444	1.41501e-05	3.50473e-05
1.1	0	0	0.00121432	0.0145361	8.46e-06	1.57e-05	0.00402356	0.0045458	1.56553e-05	3.65369e-05
1.2	0	0	0.00119859	0.0152339	8.23e-06	1.71e-05	0.00407086	0.00475428	1.70513e-05	3.7925e-05
1.3	0	0	0.00119487	0.0158705	8.04e-06	1.84e-05	0.00411069	0.00494443	1.83766e-05	3.92996e-05
1.4	0	0	0.0011918	0.0164597	7.86e-06	1.96e-05	0.00415041	0.00511925	1.96289e-05	4.06172e-05
0.8	0.5	0	0.00143998	0.00942518	9.48e-06	1.08e-05	0.00380732	0.00392698	6.84166e-06	3.77087e-05
0.9	0.5	0	0.00130004	0.0119566	9.02e-06	1.11e-05	0.00390532	0.00409032	1.08178e-05	3.59857e-05
1	0.5	0	0.00122686	0.0135554	8.66e-06	1.37e-05	0.00398007	0.00424719	1.37199e-05	3.50914e-05
1.1	0.5	0	0.0012141	0.0143856	8.46e-06	1.53e-05	0.00402371	0.00449874	1.53326e-05	3.62357e-05
1.2	0.5	0	0.00120016	0.0150778	8.24e-06	1.67e-05	0.00406973	0.00470578	1.67069e-05	3.76165e-05
1.3	0.5	0	0.00119644	0.0157142	8.05e-06	1.8e-05	0.00410946	0.00489599	1.80203e-05	3.89783e-05
1.4	0.5	0	0.00132224	0.016133	8.38e-06	1.92e-05	0.00404084	0.00504142	1.92251e-05	3.95679e-05
0.8	1	0	0.00146022	0.00896387	9.53e-06	1.08e-05	0.00379761	0.00391079	6.19921e-06	3.78389e-05
0.9	1	0	0.00131788	0.0116925	9.06e-06	1.11e-05	0.00389569	0.00407426	1.03631e-05	3.61738e-05
1	1	0	0.00123671	0.0133551	8.69e-06	1.33e-05	0.00397415	0.00420504	1.33315e-05	3.51609e-05
1.1	1	0	0.00121408	0.014256	8.46e-06	1.51e-05	0.00402372	0.00445818	1.50574e-05	3.59817e-05
1.2	1	0	0.00120151	0.014944	8.24e-06	1.64e-05	0.00406877	0.00466423	1.64146e-05	3.7355e-05
1.3	1	0	0.00119779	0.0155802	8.05e-06	1.77e-05	0.00410841	0.00485448	1.77177e-05	3.87064e-05
1.4	1	0	0.00131489	0.0160108	8.35e-06	1.89e-05	0.00404702	0.00500189	1.89143e-05	3.92942e-05
0.8	1.5	0	0.00147538	0.00859128	9.57e-06	1.08e-05	0.00379033	0.00389866	5.70208e-06	3.78895e-05
0.9	1.5	0	0.00133247	0.0114967	9.1e-06	1.11e-05	0.00388781	0.00406113	1.0033e-05	3.63181e-05
1	1.5	0	0.0012431	0.0131983	8.71e-06	1.3e-05	0.00397032	0.00419865	1.3029e-05	3.51594e-05
1.1	1.5	0	0.00121417	0.0141495	8.46e-06	1.48e-05	0.00402366	0.00442489	1.48334e-05	3.57773e-05
1.2	1.5	0	0.00120261	0.0148348	8.25e-06	1.62e-05	0.00406797	0.0046303	1.61778e-05	3.71434e-05
1.3	1.5	0	0.00119889	0.0154708	8.06e-06	1.75e-05	0.00410755	0.00482057	1.74724e-05	3.84867e-05
1.4	1.5	0	0.00130926	0.0159104	8.32e-06	1.87e-05	0.00405175	0.00496952	1.86623e-05	3.9073e-05
0.8	2	0	0.00149087	0.00823721	9.6e-06	1.08e-05	0.00378289	0.00388627	5.24883e-06	3.8003e-05
0.9	2	0	0.00134282	0.0113565	9.13e-06	1.11e-05	0.00388222	0.00405181	9.79967e-06	3.64059e-05
1	2	0	0.00125009	0.0130632	8.73e-06	1.28e-05	0.00396613	0.00419166	1.27733e-05	3.52237e-05
1.1	2	0	0.00121431	0.0140683	8.46e-06	1.47e-05	0.00402357	0.00439951	1.46639e-05	3.56242e-05
1.2	2	0	0.00120344	0.0147521	8.25e-06	1.6e-05	0.00406738	0.00460459	1.59995e-05	3.69843e-05
1.3	2	0	0.00119972	0.0153879	8.06e-06	1.73e-05	0.0041069	0.00479486	1.72875e-05	3.83213e-05
1.4	2	0	0.0013052	0.0158341	8.31e-06	1.85e-05	0.00405515	0.00494494	1.84725e-05	3.89067e-05
0.8	2.5	0	0.00150622	0.00790655	9.64e-06	1.08e-05	0.00377553	0.00387399	4.84235e-06	3.8186e-05
0.9	2.5	0	0.00134839	0.0112661	9.14e-06	1.11e-05	0.00387922	0.00404681	9.64942e-06	3.6429e-05
1	2.5	0	0.0012552	0.0129693	8.74e-06	1.26e-05	0.00396306	0.00418655	1.25971e-05	3.52796e-05
1.1	2.5	0	0.00121443	0.0140143	8.46e-06	1.46e-05	0.00402349	0.00438264	1.45517e-05	3.55237e-05
1.2	2.5	0	0.00120399	0.0146972	8.25e-06	1.59e-05	0.00406698	0.00458755	1.58819e-05	3.68794e-05
1.3	2.5	0	0.00120028	0.0153329	8.06e-06	1.72e-05	0.00410647	0.0047778	1.71654e-05	3.82122e-05
1.4	2.5	0	0.00130262	0.0157833	8.3e-06	1.83e-05	0.00405732	0.00492861	1.83471e-05	3.87969e-05
0.8	3	0	0.0015069	0.00785266	9.64e-06	1.08e-05	0.0037752	0.00387344	4.77685e-06	3.81339e-05
0.9	3	0	0.00135348	0.0112048	9.16e-06	1.1e-05	0.00387647	0.00404222	9.54941e-06	3.65059e-05
1	3	0	0.00125546	0.0129393	8.75e-06	1.25e-05	0.0039629	0.00418628	1.25393e-05	3.52383e-05
1.1	3	0	0.00121449	0.0139887	8.46e-06	1.45e-05	0.00402345	0.00437464	1.44987e-05	3.54765e-05
1.2	3	0	0.00120425	0.0146713	8.25e-06	1.58e-05	0.00406679	0.0045795	1.58265e-05	3.68299e-05
1.3	3	0	0.00120054	0.0153069	8.06e-06	1.71e-05	0.00410627	0.00476976	1.7108e-05	3.8161e-05
1.4	3	0	0.00130142	0.0157593	8.29e-06	1.83e-05	0.00405833	0.0049209	1.82881e-05	3.87453e-05
0.8	3.5	0	0.00150681	0.00786001	9.64e-06	1.08e-05	0.00377524	0.00387352	4.78576e-06	3.81409e-05
1.4	0	-4	0.00143612	0.00906609	8.83e-06	1.12e-05	0.00394518	0.00415675	6.1754e-06	3.72339e-05
1.3	0	-3	0.00133872	0.0113774	8.58e-06	1.14e-05	0.00399848	0.00424559	9.63355e-06	3.63494e-05
1.4	0	-3	0.00128817	0.0125516	8.24e-06	1.16e-05	0.00406946	0.00436387	1.15781e-05	3.51863e-05
1.3	0	-2	0.00121998	0.01368	8.14e-06	1.37e-05	0.0040911	0.00439995	1.37011e-05	3.52946e-05
1.4	0	-2	0.0012134	0.0142871	7.94e-06	1.48e-05	0.00413227	0.00446856	1.48363e-05	3.63575e-05
1.3	0	-1	0.00120516	0.0148478	8.08e-06	1.61e-05	0.00410266	0.00462741	1.61073e-05	3.72712e-05
1.4	0	-1	0.00128295	0.0153307	8.22e-06	1.73e-05	0.00407384	0.00478386	1.72595e-05	3.78498e-05
1.3	0	0	0.00119487	0.0158705	8.04e-06	1.84e-05	0.00411069	0.00494443	1.83766e-05	3.92996e-05
1.4	0	0	0.0011918	0.0164597	7.86e-06	1.96e-05	0.00415041	0.00511925	1.96289e-05	4.06172e-05
1.3	0	1	0.00118579	0.0167882	8.01e-06	2.05e-05	0.00411777	0.00522875	2.05377e-05	4.12784e-05
1.4	0	1	0.00118288	0.0173804	7.82e-06	2.19e-05	0.0041579	0.00540389	2.18577e-05	4.26728e-05
1.3	0	2	0.00117794	0.0176172	7.98e-06	2.26e-05	0.00412389	0.00548549	2.25917e-05	4.32112e-05
1.4	0	2	0.00117518	0.0182165	7.79e-06	2.4e-05	0.00416437	0.00566226	2.39839e-05	4.46757e-05
1.3	0	3	0.00117115	0.0183758	7.96e-06	2.46e-05	0.00412919	0.00572041	2.45564e-05	4.50946e-05
1.4	0	3	0.00116854	0.0189839	7.76e-06	2.6e-05	0.00416995	0.00589941	2.60219e-05	4.66256e-05
1.3	0	4	0.0011652	0.0190801	7.93e-06	2.65e-05	0.00413383	0.00593847	2.64532e-05	4.69262e-05
1.4	0	4	0.00177624	0.018789	1.02e-05	2.79e-05	0.00365948	0.00597204	2.79302e-05	4.75129e-05
1.3	0	5	0.00115989	0.019741	7.91e-06	2.83e-05	0.00413797	0.00614309	2.82971e-05	4.87065e-05
1.4	0	5	0.00115753	0.0203653	7.72e-06	2.99e-05	0.0041792	0.00632619	2.98983e-05	5.0366e-05
1.3	0	6	0.00115508	0.0203653	7.9e-06	3.01e-05	0.00414172	0.00633633	3.00952e-05	5.04381e-05
1.4	0	6	0.00115282	0.0209963	7.7e-06	3.18e-05	0.00418316	0.00652109	3.17577e-05	5.21601e-05
1.3	0	7	0.00115069	0.0209566	7.88e-06	3.18e-05	0.00414515	0.00651934	3.1849e-05	5.21245e-05
1.4	0	7	0.0011485	0.0215938	7.68e-06	3.36e-05	0.00418678	0.00670564	3.35697e-05	5.39074e-05
1.3	0	8	0.00114665	0.0215173	7.87e-06	3.36e-05	0.0041483	0.00669287	3.35576e-05	5.37681e-05
1.4	0	8	0.00114453	0.0221607	7.67e-06	3.53e-05	0.00419012	0.0068807	3.53348e-05	5.56104e-05
1.3	0	9	0.00114294	0.0220496	7.85e-06	3.52e-05	0.0041512	0.00685758	3.52204e-05	5.53719e-05
1.4	0	9	0.00114087	0.0226993	7.65e-06	3.71e-05	0.00419319	0.00704701	3.70534e-05	5.72718e-05
1.3	0	10	0.00113951	0.0225553	7.84e-06	3.68e-05	0.00415387	0.00701408	3.68375e-05	5.69377e-05
1.4	0	10	0.00113751	0.0232117	7.64e-06	3.87e-05	0.00419601	0.00720523	3.87261e-05	5.88938e-05

## Sheet: （18，25.4）
																					whole potentials of the equilibrium droplet		the unit length energy barrier
0	0	0	0.00182368	0	1.04e-05	1.04e-05	0.00364736	0.00364736	0	4.17933e-05		(0,0,0)	-5.107	0.8942	7.809	0.6655	-1723	25.43	-28.19		2.847e-06		5.6e-06
0.2	0	0	0.00171835	0.00493544	1.04e-05	1.05e-05	0.00366	0.00366842	1.93392e-06	4.03136e-05		(1,0,0)	3.367	4.174	-13.57	3.253	3834	14.25	141
0.4	0	0	0.00161866	0.00654285	1.02e-05	1.06e-05	0.00369656	0.00372937	3.37619e-06	3.90033e-05		(0,1,0)	0.24	-4.303	-0.8701	-0.265	-106	-9.041	73.91
0.6	0	0	0.00151897	0.00764238	9.92e-06	1.08e-05	0.00375706	0.00383018	4.556e-06	3.78026e-05		(0,0,1)	0.08434	1.838	0.1637	0.7028	48.3	2.581	0.8905
0.7	0	0	0.00146017	0.00838456	9.72e-06	1.09e-05	0.00380003	0.00390182	5.44145e-06	3.63088e-05		(2,0,0)	6.683	11.93	13.98	6.074	-2513	1.634	-87.87
0.75	0	0	0.00139178	0.0100007	9.52e-06	1.1e-05	0.00384171	0.00397128	7.68342e-06	3.54542e-05		(1,1,0)	-0.04457	1.991	0.9071	0.08463	142.7	4.729	-167.9
0.85	0	0	0.00128465	0.0120812	9.14e-06	1.12e-05	0.00392226	0.00410553	1.10524e-05	3.45058e-05		(1,0,1)	-0.0735	-3.181	-0.314	-1.371	-92.07	-6.66	-3.178
0.9	0	0	0.00124823	0.0127594	8.96e-06	1.22e-05	0.0039581	0.00416527	1.22497e-05	3.44681e-05		(0,2,0)	-0.008701	0.3049	0.04329	0.006516	3.554	0.5702	0.1103
0.95	0	0	0.00121344	0.0133549	8.79e-06	1.33e-05	0.0039952	0.00422709	1.33318e-05	3.4412e-05		(0,1,1)	1	1	1	1	1	1	1
1	0	0	0.00119081	0.0138566	8.64e-06	1.43e-05	0.00402708	0.00433673	1.42716e-05	3.45522e-05		(0,0,2)	0.0002645	-0.0293	-0.002398	-0.006257	-0.2022	0.007827	0.0257
1.1	0	0	0.00114293	0.0147391	8.3e-06	1.6e-05	0.00409666	0.00459907	1.59506e-05	3.47376e-05		(3,0,0)	-2.303	-8.552	-5.192	-6.449	431.3	-31.34	3.306
1.2	0	0	0.00110389	0.0154809	7.97e-06	1.74e-05	0.00416561	0.00481631	1.73856e-05	3.503e-05		(2,1,0)	-0.185	4.339	0.1484	0.195	-21.15	9.557	126.9
1.3	0	0	0.00106929	0.0161303	7.64e-06	1.86e-05	0.00423578	0.00500343	1.86457e-05	3.53301e-05		(2,0,1)	-0.01533	1.442	0.1597	0.8067	56.73	5.463	3.448
1.4	0	0	0.00103578	0.0167111	7.29e-06	1.98e-05	0.0043092	0.0051676	1.97601e-05	3.55374e-05		(1,2,0)	-0.005039	-0.474	-0.06949	0.0007393	-6.566	-0.9899	-0.1905
1.5	0	0	0.0010093	0.0172378	6.95e-06	2.08e-05	0.0043803	0.00531472	2.077e-05	3.5887e-05		(1,1,1)	1	1	1	1	1	1	1
1.6	0	0	0.000983704	0.0177229	6.6e-06	2.17e-05	0.00445374	0.00544778	2.1682e-05	3.61637e-05		(1,0,2)	-0.0008508	0.03541	0.002664	0.006534	0.2591	-0.01607	-0.03859
1.7	0	0	0.000961917	0.0181766	6.25e-06	2.25e-05	0.00452636	0.00557069	2.2527e-05	3.64895e-05		(0,3,0)	0.0004965	0.0005986	0.0001348	-0.0002574	0.03084	0.003453	0.0006882
1.8	0	0	0.00094089	0.0186013	5.9e-06	2.33e-05	0.00460077	0.00568369	2.32976e-05	3.67568e-05		(0,2,1)	1	1	1	1	1	1	1
1.9	0	0	0.00092054	0.019	5.53e-06	2.4e-05	0.00467694	0.00578782	2.39987e-05	3.69696e-05		(0,1,2)	1	1	1	1	1	1	1
2	0	0	0.000903723	0.0193825	5.18e-06	2.47e-05	0.00475131	0.00588694	2.46673e-05	3.72501e-05		(0,0,3)	7.657e-06	0.0001557	1.398e-05	3.41e-05	1.397e-05	-3.976e-05	-0.0001501
1.2	0	-4	0.00155864	0.00389981	9.54e-06	1.1e-05	0.00383819	0.00396541	1.16912e-06	3.92636e-05		(4,0,0)	0.02888	1.425	0.5168	1.471	42.24	12.06	7.922
1.3	0	-4	0.00151743	0.00668044	9.31e-06	1.11e-05	0.00388623	0.00404548	3.40128e-06	3.89694e-05		(3,1,0)	0.04091	-2.435	-0.2348	-0.05541	-17.86	-5.814	-31.75
1.4	0	-4	0.00143875	0.00901975	8.9e-06	1.14e-05	0.0039707	0.00418626	6.10779e-06	3.72393e-05		(3,0,1)	0.01774	-0.1035	-0.0171	-0.1415	-10.92	-1.395	-1.155
1.1	0	-3	0.00151399	0.00727597	9.47e-06	1.1e-05	0.00385175	0.00398802	4.05973e-06	3.71263e-05		(2,2,0)	0.01034	0.1712	0.02555	-0.007039	2.717	0.3989	0.06458
1.2	0	-3	0.00140723	0.00981764	9.02e-06	1.13e-05	0.0039472	0.0041471	7.26646e-06	3.70591e-05		(2,1,1)	1	1	1	1	1	1	1
1.3	0	-3	0.00133449	0.0114123	8.63e-06	1.15e-05	0.00402893	0.0042833	9.67759e-06	3.61537e-05		(2,0,2)	0.0003855	-0.008908	-0.0004854	-0.001091	-0.07202	0.008952	0.01484
1.4	0	-3	0.0012883	0.012542	8.3e-06	1.17e-05	0.00409708	0.00439689	1.15489e-05	3.51238e-05		(1,3,0)	-0.0004227	0.0001788	1.195e-05	0.000329	-0.01245	-0.001432	0.0003719
0.9	0	-2	0.00156247	0.0057087	9.77e-06	1.09e-05	0.00378841	0.00388244	2.52778e-06	3.96812e-05		(1,2,1)	1	1	1	1	1	1	1
1	0	-2	0.00143497	0.00923559	9.33e-06	1.11e-05	0.00388058	0.00403607	6.5073e-06	3.62745e-05		(1,1,2)	1	1	1	1	1	1	1
1.1	0	-2	0.00133779	0.0114311	8.92e-06	1.14e-05	0.00396805	0.00418184	9.8147e-06	3.59077e-05		(1,0,3)	-3.958e-06	-0.0001066	-9.419e-06	-2.101e-05	-0.0001781	3.697e-05	0.0001222
1.2	0	-2	0.00126959	0.0127282	8.54e-06	1.2e-05	0.0040463	0.00431226	1.2001e-05	3.53519e-05		(0,4,0)	4.303e-07	-1.19e-05	-2.165e-06	-2.299e-06	-0.0002016	-2.212e-05	-1.659e-05
1.3	0	-2	0.00122013	0.0136703	8.2e-06	1.37e-05	0.00411813	0.00443197	1.36697e-05	3.52321e-05		(0,3,1)	1	1	1	1	1	1	1
1.4	0	-2	0.00123557	0.0143517	8.09e-06	1.5e-05	0.00414137	0.00447071	1.50052e-05	3.47732e-05		(0,2,2)	1	1	1	1	1	1	1
0.8	0	-1	0.0015612	0.00501531	9.85e-06	1.08e-05	0.00377335	0.00385735	1.95633e-06	3.88731e-05		(0,1,3)	1	1	1	1	1	1	1
0.9	0	-1	0.00142033	0.0100206	9.41e-06	1.11e-05	0.00386517	0.00401037	7.68172e-06	3.74011e-05		(0,0,4)	-3.018e-08	-2.286e-07	-2.096e-08	-5.661e-08	1.714e-06	3.56e-08	1.78e-07
1	0	-1	0.00130116	0.0120831	8.95e-06	1.13e-05	0.00396087	0.00416988	1.09802e-05	3.56631e-05
1.1	0	-1	0.00123349	0.0134275	8.59e-06	1.34e-05	0.00403688	0.00429657	1.33782e-05	3.51279e-05
1.2	0	-1	0.00118437	0.0143028	8.25e-06	1.5e-05	0.00410766	0.00446083	1.49914e-05	3.51928e-05
1.3	0	-1	0.00114777	0.0150383	7.93e-06	1.64e-05	0.00417457	0.00467681	1.63799e-05	3.54863e-05
1.4	0	-1	0.00110796	0.0156991	7.58e-06	1.76e-05	0.00424856	0.00486705	1.76231e-05	3.55603e-05
0.8	0	0	0.00142394	0.00983774	9.53e-06	1.1e-05	0.00383924	0.00396715	7.43843e-06	3.76111e-05
0.9	0	0	0.0012904	0.0121854	9.07e-06	1.13e-05	0.00393533	0.00412732	1.12178e-05	3.59783e-05
1	0	0	0.00121693	0.0137627	8.71e-06	1.41e-05	0.00401141	0.00431028	1.41179e-05	3.49855e-05
1.1	0	0	0.00117917	0.0146492	8.42e-06	1.58e-05	0.00407274	0.00457574	1.58231e-05	3.51828e-05
1.2	0	0	0.00111698	0.0154396	8.02e-06	1.73e-05	0.00415618	0.00480539	1.73214e-05	3.53727e-05
1.3	0	0	0.0010791	0.0160945	7.68e-06	1.86e-05	0.00422813	0.00499392	1.85876e-05	3.56033e-05
1.4	0	0	0.00105003	0.0166741	7.35e-06	1.97e-05	0.00429723	0.00515877	1.97135e-05	3.59729e-05
0.7	0	1	0.00151227	0.00828351	9.82e-06	1.08e-05	0.00377815	0.00386534	5.3321e-06	4.07853e-05
0.8	0	1	0.00133399	0.0116697	9.33e-06	1.11e-05	0.00388241	0.00403911	1.03861e-05	3.70471e-05
0.9	0	1	0.00120771	0.013744	8.86e-06	1.42e-05	0.00397998	0.00431033	1.41582e-05	3.53116e-05
1	0	1	0.00117878	0.0148241	8.6e-06	1.63e-05	0.0040343	0.00463806	1.63132e-05	3.50892e-05
1.1	0	1	0.00110239	0.0156367	8.18e-06	1.79e-05	0.00412341	0.00487356	1.78686e-05	3.54548e-05
1.2	0	1	0.00106398	0.0163139	7.84e-06	1.92e-05	0.00419434	0.00506927	1.92105e-05	3.57586e-05
1.3	0	1	0.0010307	0.0169163	7.5e-06	2.04e-05	0.00426588	0.00524057	2.04004e-05	3.6094e-05
1.4	0	1	0.00100079	0.0174663	7.15e-06	2.15e-05	0.00433859	0.00539451	2.14775e-05	3.63972e-05
0.7	0	2	0.00139677	0.0105932	9.59e-06	1.1e-05	0.00382666	0.0039462	8.64431e-06	3.91165e-05
0.8	0	2	0.00124584	0.0131413	9.12e-06	1.31e-05	0.00392472	0.00413131	1.30715e-05	3.61275e-05
0.9	0	2	0.00115097	0.0148306	8.71e-06	1.64e-05	0.00401062	0.00464487	1.6396e-05	3.52706e-05
1	0	2	0.00118249	0.0155915	8.61e-06	1.81e-05	0.00403207	0.00487863	1.8053e-05	3.5451e-05
1.1	0	2	0.00105165	0.0164216	8.02e-06	1.96e-05	0.0041569	0.00511087	1.95924e-05	3.5712e-05
1.2	0	2	0.00101798	0.0170378	7.68e-06	2.08e-05	0.00422746	0.00528679	2.08329e-05	3.61372e-05
1.3	0	2	0.000984505	0.0176148	7.32e-06	2.2e-05	0.00430192	0.00544874	2.19828e-05	3.64217e-05
1.4	0	2	0.000958816	0.0181439	6.98e-06	2.3e-05	0.00437385	0.00559561	2.30366e-05	3.68378e-05
0.7	0	3	0.00132026	0.0119074	9.44e-06	1.11e-05	0.0038588	0.00399975	1.08592e-05	3.85398e-05
0.8	0	3	0.00121532	0.0143227	9.05e-06	1.55e-05	0.00393937	0.00449979	1.54868e-05	3.556e-05
0.9	0	3	0.00109572	0.015595	8.57e-06	1.8e-05	0.00404046	0.00487795	1.80344e-05	3.52594e-05
1	0	3	0.00123577	0.0162053	8.76e-06	1.96e-05	0.00400011	0.00507777	1.96131e-05	3.57713e-05
1.1	0	3	0.00131933	0.0167525	8.86e-06	2.1e-05	0.00398023	0.00525378	2.1034e-05	3.61439e-05
1.2	0	3	0.000977906	0.017667	7.54e-06	2.23e-05	0.00425632	0.00547536	2.22882e-05	3.65118e-05
1.3	0	3	0.000948692	0.0182255	7.19e-06	2.34e-05	0.00432985	0.00563106	2.34205e-05	3.69124e-05
1.4	0	3	0.000923413	0.0187334	6.84e-06	2.44e-05	0.00440358	0.00577028	2.44329e-05	3.7316e-05
0.7	0	4	0.00124263	0.0130931	9.28e-06	1.31e-05	0.0038914	0.00412221	1.30532e-05	3.7876e-05
0.8	0	4	0.00123664	0.0151849	9.1e-06	1.74e-05	0.00392914	0.00477283	1.74393e-05	3.55202e-05
0.9	0	4	0.00105735	0.0161864	8.47e-06	1.94e-05	0.00406118	0.0050584	1.93573e-05	3.56443e-05
1	0	4	0.00135204	0.0166671	9.1e-06	2.1e-05	0.00393034	0.00523843	2.10055e-05	3.60734e-05
1.1	0	4	0.000977406	0.0176061	7.78e-06	2.23e-05	0.0042059	0.00546811	2.23292e-05	3.65656e-05
1.2	0	4	0.000943212	0.0182153	7.42e-06	2.36e-05	0.0042813	0.00563935	2.35909e-05	3.69014e-05
1.3	0	4	0.000915113	0.0187489	7.06e-06	2.47e-05	0.00435604	0.00578646	2.46737e-05	3.73069e-05
1.4	0	4	0.000891818	0.0192418	6.71e-06	2.57e-05	0.00443012	0.0059204	2.56606e-05	3.77553e-05
0.7	0	5	0.0011573	0.0142313	9.11e-06	1.53e-05	0.00392724	0.00447347	1.53229e-05	3.68745e-05
0.8	0	5	0.00130423	0.0158102	9.26e-06	1.9e-05	0.00389669	0.00497649	1.9015e-05	3.56047e-05
0.9	0	5	0.00102246	0.0167418	8.38e-06	2.06e-05	0.00408002	0.00522773	2.06401e-05	3.59972e-05
1	0	5	0.00154176	0.0169741	9.64e-06	2.22e-05	0.00381651	0.00536191	2.22352e-05	3.63754e-05
1.1	0	5	0.000943053	0.0181035	7.67e-06	2.35e-05	0.00422857	0.00561719	2.35158e-05	3.6858e-05
1.2	0	5	0.000913637	0.0186935	7.32e-06	2.48e-05	0.00430259	0.00578223	2.47546e-05	3.73241e-05
1.3	0	5	0.000885312	0.0191999	6.95e-06	2.58e-05	0.00437929	0.00591994	2.57721e-05	3.76802e-05
1.4	0	5	0.000860676	0.0196691	6.59e-06	2.67e-05	0.00445628	0.00604536	2.66936e-05	3.80371e-05
0.7	0	6	0.0010989	0.0151038	8.99e-06	1.72e-05	0.00395177	0.00474263	1.71842e-05	3.63475e-05
0.8	0	6	0.00142548	0.0162208	9.54e-06	2.02e-05	0.0038385	0.00511892	2.02252e-05	3.57934e-05
0.9	0	6	0.00099102	0.0172533	8.3e-06	2.19e-05	0.004097	0.00538352	2.18553e-05	3.63282e-05
1.1	0	6	0.000916647	0.0185633	7.59e-06	2.47e-05	0.004246	0.00575563	2.4651e-05	3.7313e-05
1.2	0	6	0.000886502	0.0191086	7.23e-06	2.58e-05	0.00432213	0.00590582	2.57794e-05	3.76986e-05
1.3	0	6	0.00085925	0.0195982	6.86e-06	2.68e-05	0.00439961	0.00603765	2.6759e-05	3.80596e-05
1.4	0	6	0.000838291	0.0200723	6.5e-06	2.77e-05	0.00447509	0.00616454	2.77105e-05	3.85452e-05
0.7	0	7	0.00106237	0.0158085	8.92e-06	1.88e-05	0.00396711	0.00496057	1.87739e-05	3.63067e-05
0.9	0	7	0.000962858	0.0177044	8.23e-06	2.3e-05	0.0041122	0.00552065	2.29516e-05	3.66541e-05
1.1	0	7	0.000891554	0.0189685	7.51e-06	2.57e-05	0.00426256	0.00587717	2.56653e-05	3.76942e-05
1.2	0	7	0.00086154	0.0194746	7.14e-06	2.67e-05	0.0043401	0.00601442	2.66937e-05	3.80341e-05
1.3	0	7	0.00083701	0.0199636	6.77e-06	2.77e-05	0.00441696	0.00614582	2.7684e-05	3.84816e-05
1.4	0	7	0.000836048	0.0205473	6.49e-06	2.9e-05	0.00447697	0.00630995	2.90284e-05	3.98676e-05
0.7	0	8	0.00103135	0.0164132	8.86e-06	2.02e-05	0.00398014	0.00514738	2.01908e-05	3.63225e-05
0.9	0	8	0.000937774	0.0180958	8.16e-06	2.39e-05	0.00412575	0.00563942	2.39208e-05	3.69841e-05
1.1	0	8	0.000867302	0.0193177	7.43e-06	2.65e-05	0.00427857	0.00598133	2.65453e-05	3.79858e-05
1.2	0	8	0.000837462	0.0197983	7.06e-06	2.75e-05	0.00435744	0.00610998	2.75064e-05	3.82958e-05
1.3	0	8	0.000834848	0.0204088	6.77e-06	2.89e-05	0.00441865	0.00628243	2.89241e-05	3.97256e-05
1.4	0	8	0.000833972	0.0210003	6.48e-06	3.03e-05	0.00447872	0.0064486	3.03135e-05	4.11556e-05
0.7	0	9	0.00100876	0.0169151	8.81e-06	2.14e-05	0.00398963	0.00530258	2.14084e-05	3.65853e-05
0.9	0	9	0.000915532	0.0184393	8.11e-06	2.48e-05	0.00413776	0.00574351	2.47854e-05	3.73233e-05
1	0	9	0.00313261	0.0167992	1.42e-05	2.61e-05	0.002862	0.0055541	2.60652e-05	3.77103e-05
1.1	0	9	0.000845264	0.0196246	7.37e-06	2.73e-05	0.00429312	0.00607265	2.73267e-05	3.82578e-05
1.2	0	9	0.000834121	0.0202086	7.05e-06	2.86e-05	0.00435984	0.00623596	2.86463e-05	3.94073e-05
1.3	0	9	0.000832833	0.020835	6.76e-06	3.01e-05	0.00442022	0.00641321	3.01367e-05	4.09395e-05
1.4	0	9	0.007964	0.0105103	3.51e-05	3.15e-05	-0.00151051	0.00483717	3.14581e-05	4.10576e-05
0.7	0	10	0.000988446	0.017328	8.77e-06	2.24e-05	0.00399816	0.00543001	2.24325e-05	3.68891e-05
0.9	0	10	0.00089067	0.0187253	8.04e-06	2.55e-05	0.00415118	0.00582928	2.55005e-05	3.74653e-05
1.1	0	10	0.00083526	0.0199639	7.33e-06	2.82e-05	0.00429972	0.00617595	2.82477e-05	3.89837e-05
1.2	0	10	0.000832191	0.0206092	7.04e-06	2.98e-05	0.00436123	0.00635921	2.97862e-05	4.05485e-05
1.3	0	10	0.000830944	0.0212441	6.75e-06	3.13e-05	0.00442169	0.00653875	3.1324e-05	4.21255e-05
1.4	0	10	0.000830211	0.0218502	6.46e-06	3.28e-05	0.00448187	0.0067087	3.2799e-05	4.36405e-05
0.8	0	0	0.00142132	0.00986993	9.53e-06	1.1e-05	0.00384049	0.00396925	7.48551e-06	3.75433e-05
0.9	0	0	0.00128328	0.0122367	9.06e-06	1.13e-05	0.00393918	0.00413372	1.13047e-05	3.57739e-05
1	0	0	0.00121661	0.0137644	8.71e-06	1.41e-05	0.0040116	0.00431076	1.41208e-05	3.49748e-05
1.1	0	0	0.00121412	0.0145271	8.53e-06	1.56e-05	0.00404967	0.00454213	1.56238e-05	3.64632e-05
1.2	0	0	0.00119839	0.0152253	8.3e-06	1.7e-05	0.00409757	0.00475059	1.70176e-05	3.78502e-05
1.3	0	0	0.00119467	0.0158623	8.11e-06	1.83e-05	0.00413799	0.0049408	1.83411e-05	3.92237e-05
1.4	0	0	0.0011916	0.0164521	7.91e-06	1.96e-05	0.00417831	0.00511568	1.95918e-05	4.05403e-05
0.8	0.5	0	0.00143974	0.00941857	9.57e-06	1.1e-05	0.00383165	0.00395451	6.82736e-06	3.76299e-05
0.9	0.5	0	0.00129982	0.0119483	9.1e-06	1.13e-05	0.00393024	0.00411883	1.07952e-05	3.59106e-05
1	0.5	0	0.00122665	0.0135462	8.74e-06	1.37e-05	0.00400558	0.00424439	1.36914e-05	3.50185e-05
1.1	0.5	0	0.0012139	0.0143767	8.53e-06	1.53e-05	0.00404982	0.00449507	1.53015e-05	3.61623e-05
1.2	0.5	0	0.00119996	0.0150692	8.3e-06	1.67e-05	0.00409644	0.00470212	1.66738e-05	3.75419e-05
1.3	0.5	0	0.00119624	0.0157061	8.11e-06	1.8e-05	0.00413676	0.00489238	1.79854e-05	3.89027e-05
1.4	0.5	0	0.00132202	0.0161263	8.44e-06	1.92e-05	0.00406876	0.00503798	1.91883e-05	3.94921e-05
0.8	1	0	0.00145998	0.00895762	9.61e-06	1.09e-05	0.00382194	0.00393832	6.18624e-06	3.77597e-05
0.9	1	0	0.00131766	0.0116845	9.14e-06	1.12e-05	0.00392061	0.00410277	1.03415e-05	3.60984e-05
1	1	0	0.00123651	0.0133462	8.77e-06	1.33e-05	0.00399966	0.00423453	1.33039e-05	3.50879e-05
1.1	1	0	0.00121388	0.0142471	8.53e-06	1.5e-05	0.00404983	0.00445454	1.50268e-05	3.59085e-05
1.2	1	0	0.00120131	0.0149354	8.31e-06	1.64e-05	0.00409547	0.00466058	1.63819e-05	3.72806e-05
1.3	1	0	0.00119758	0.0155721	8.12e-06	1.77e-05	0.00413571	0.00485088	1.76832e-05	3.8631e-05
1.4	1	0	0.00131467	0.016004	8.41e-06	1.89e-05	0.00407493	0.00499845	1.88779e-05	3.92186e-05
0.8	1.5	0	0.00147514	0.00858528	9.65e-06	1.09e-05	0.00381466	0.00392619	5.69009e-06	3.78098e-05
0.9	1.5	0	0.00133225	0.0114888	9.18e-06	1.12e-05	0.00391273	0.00408965	1.00121e-05	3.62424e-05
1	1.5	0	0.00124289	0.0131894	8.78e-06	1.3e-05	0.00399583	0.00422815	1.30019e-05	3.50863e-05
1.1	1.5	0	0.00121397	0.0141406	8.53e-06	1.48e-05	0.00404977	0.00442125	1.48031e-05	3.57042e-05
1.2	1.5	0	0.00120241	0.0148263	8.31e-06	1.61e-05	0.00409468	0.00462668	1.61456e-05	3.70693e-05
1.3	1.5	0	0.00119869	0.0154628	8.12e-06	1.74e-05	0.00413485	0.00481699	1.74383e-05	3.84115e-05
1.4	1.5	0	0.00130904	0.0159036	8.38e-06	1.86e-05	0.00407966	0.00496608	1.86263e-05	3.89975e-05
0.8	2	0	0.00149062	0.00823149	9.69e-06	1.09e-05	0.00380723	0.00391381	5.2378e-06	3.79231e-05
0.9	2	0	0.0013426	0.0113487	9.21e-06	1.12e-05	0.00390714	0.00408033	9.77922e-06	3.633e-05
1	2	0	0.00124988	0.0130544	8.8e-06	1.27e-05	0.00399164	0.00422116	1.27467e-05	3.51503e-05
1.1	2	0	0.00121411	0.0140594	8.53e-06	1.46e-05	0.00404968	0.00439589	1.46339e-05	3.55513e-05
1.2	2	0	0.00120324	0.0147435	8.32e-06	1.6e-05	0.00409408	0.00460097	1.59675e-05	3.69102e-05
1.3	2	0	0.00119952	0.0153798	8.12e-06	1.73e-05	0.0041342	0.00479127	1.72536e-05	3.82461e-05
1.4	2	0	0.00130499	0.0158272	8.37e-06	1.84e-05	0.00408306	0.00494149	1.84367e-05	3.88312e-05
0.8	2.5	0	0.00150597	0.0079011	9.72e-06	1.09e-05	0.00379986	0.00390153	4.83218e-06	3.81057e-05
0.9	2.5	0	0.00134816	0.0112584	9.22e-06	1.12e-05	0.00390414	0.00407533	9.62927e-06	3.63529e-05
1	2.5	0	0.00125499	0.0129605	8.82e-06	1.26e-05	0.00398857	0.00421605	1.25708e-05	3.52061e-05
1.1	2.5	0	0.00121423	0.0140053	8.53e-06	1.45e-05	0.0040496	0.004379	1.45218e-05	3.54506e-05
1.2	2.5	0	0.00120379	0.0146887	8.32e-06	1.59e-05	0.00409368	0.00458394	1.58501e-05	3.68055e-05
1.3	2.5	0	0.00120008	0.0153248	8.13e-06	1.71e-05	0.00413377	0.00477422	1.71317e-05	3.81372e-05
1.4	2.5	0	0.0013024	0.0157764	8.36e-06	1.83e-05	0.00408524	0.00492517	1.83115e-05	3.87216e-05
0.8	3	0	0.00150665	0.00784723	9.72e-06	1.09e-05	0.00379953	0.00390098	4.76679e-06	3.80536e-05
0.9	3	0	0.00135325	0.0111971	9.24e-06	1.12e-05	0.00390139	0.00407074	9.52947e-06	3.64297e-05
1	3	0	0.00125525	0.0129306	8.82e-06	1.25e-05	0.00398842	0.00421579	1.25132e-05	3.51649e-05
1.1	3	0	0.00121429	0.0139798	8.53e-06	1.45e-05	0.00404956	0.00437101	1.44689e-05	3.54035e-05
1.2	3	0	0.00120405	0.0146628	8.32e-06	1.58e-05	0.00409349	0.00457589	1.57947e-05	3.6756e-05
1.3	3	0	0.00120034	0.0152989	8.13e-06	1.71e-05	0.00413357	0.00476619	1.70744e-05	3.8086e-05
1.4	3	0	0.0013012	0.0157524	8.35e-06	1.83e-05	0.00408624	0.00491746	1.82526e-05	3.86701e-05
0.8	3.5	0	0.00150656	0.00785457	9.72e-06	1.09e-05	0.00379958	0.00390106	4.77568e-06	3.80606e-05
1.4	0	-4	0.00143588	0.0090619	8.89e-06	1.14e-05	0.00397311	0.00419028	6.16236e-06	3.71553e-05
1.3	0	-3	0.0013385	0.0113713	8.64e-06	1.15e-05	0.0040258	0.0042781	9.61342e-06	3.62734e-05
1.4	0	-3	0.00128796	0.012545	8.3e-06	1.17e-05	0.00409737	0.00439737	1.15538e-05	3.51125e-05
1.3	0	-2	0.00121977	0.0136722	8.2e-06	1.37e-05	0.00411841	0.00443244	1.36728e-05	3.52217e-05
1.4	0	-2	0.0012132	0.0142797	8e-06	1.48e-05	0.00416017	0.00450204	1.48062e-05	3.62836e-05
1.3	0	-1	0.00120496	0.0148397	8.14e-06	1.61e-05	0.00412996	0.00462386	1.60751e-05	3.71968e-05
1.4	0	-1	0.00128274	0.0153236	8.28e-06	1.72e-05	0.00410175	0.00478042	1.72255e-05	3.77753e-05
1.3	0	0	0.00119467	0.0158623	8.11e-06	1.83e-05	0.00413799	0.0049408	1.83411e-05	3.92237e-05
1.4	0	0	0.0011916	0.0164521	7.91e-06	1.96e-05	0.00417831	0.00511568	1.95918e-05	4.05403e-05
1.3	0	1	0.00118559	0.01678	8.07e-06	2.05e-05	0.00414507	0.00522504	2.04992e-05	4.1201e-05
1.4	0	1	0.00118268	0.0173728	7.88e-06	2.18e-05	0.0041858	0.00540025	2.18175e-05	4.25942e-05
1.3	0	2	0.00117774	0.0176089	8.04e-06	2.26e-05	0.00415119	0.00548173	2.25504e-05	4.31322e-05
1.4	0	2	0.00117498	0.0182088	7.85e-06	2.39e-05	0.00419226	0.00565856	2.39408e-05	4.45954e-05
1.3	0	3	0.00117095	0.0183675	8.02e-06	2.45e-05	0.00415649	0.00571659	2.45125e-05	4.5014e-05
1.4	0	3	0.00116834	0.0189762	7.82e-06	2.6e-05	0.00419785	0.00589565	2.59761e-05	4.65437e-05
1.3	0	4	0.001165	0.0190717	8e-06	2.64e-05	0.00416113	0.00593459	2.64068e-05	4.6844e-05
1.4	0	4	0.00177595	0.0187868	1.03e-05	2.79e-05	0.00368746	0.00596911	2.78817e-05	4.74305e-05
1.3	0	5	0.0011597	0.0197327	7.98e-06	2.82e-05	0.00416527	0.00613919	2.82485e-05	4.86227e-05
1.4	0	5	0.00115734	0.0203576	7.78e-06	2.98e-05	0.00420709	0.00632236	2.98478e-05	5.02808e-05
1.3	0	6	0.00115489	0.020357	7.96e-06	3e-05	0.00416901	0.00633239	3.00444e-05	5.03529e-05
1.4	0	6	0.00115263	0.0209886	7.76e-06	3.17e-05	0.00421105	0.00651722	3.17048e-05	5.20733e-05
1.3	0	7	0.0011505	0.0209482	7.94e-06	3.18e-05	0.00417244	0.00651536	3.1796e-05	5.20377e-05
1.4	0	7	0.00114831	0.0215861	7.74e-06	3.35e-05	0.00421467	0.00670173	3.35146e-05	5.3819e-05
1.3	0	8	0.00114646	0.021509	7.93e-06	3.35e-05	0.00417559	0.00668887	3.35026e-05	5.368e-05
1.4	0	8	0.00114434	0.022153	7.72e-06	3.53e-05	0.00421801	0.00687677	3.52777e-05	5.55205e-05
1.3	0	9	0.00114274	0.0220412	7.91e-06	3.52e-05	0.00417849	0.00685354	3.51634e-05	5.52822e-05
1.4	0	9	0.00114068	0.0226917	7.71e-06	3.7e-05	0.00422108	0.00704306	3.69943e-05	5.71803e-05
1.3	0	10	0.00113932	0.022547	7.9e-06	3.68e-05	0.00418116	0.00701001	3.67786e-05	5.68466e-05
1.4	0	10	0.00113732	0.0232041	7.7e-06	3.87e-05	0.0042239	0.00720124	3.8665e-05	5.8801e-05

## Sheet: （19，25.4）
																					whole potentials of the equilibrium droplet		the unit length energy barrier
0	0	0	0.00182368	0	1.04e-05	1.04e-05	0.00364736	0.00364736	0	4.17933e-05		(0,0,0)	-5.107	0.8942	7.809	0.6655	-1723	25.43	-28.19		2.845e-06		5.6e-06
0.2	0	0	0.00171675	0.00492717	1.04e-05	1.05e-05	0.00366019	0.00366875	1.92738e-06	4.01794e-05		(1,0,0)	3.367	4.174	-13.57	3.253	3834	14.25	141
0.4	0	0	0.00161575	0.00653079	1.02e-05	1.06e-05	0.00369726	0.00373053	3.36333e-06	3.88589e-05		(0,1,0)	0.2399	-4.303	-0.8701	-0.265	-106	-9.041	73.91
0.6	0	0	0.00151476	0.00762982	9.92e-06	1.08e-05	0.00375857	0.00383271	4.53979e-06	3.76741e-05		(0,0,1)	0.08455	1.838	0.1637	0.7028	48.3	2.581	0.8905
0.7	0	0	0.00145993	0.00838075	9.72e-06	1.09e-05	0.00380014	0.00390199	5.43641e-06	3.62751e-05		(2,0,0)	6.684	11.93	13.98	6.074	-2513	1.634	-87.87
0.75	0	0	0.00139155	0.00999575	9.52e-06	1.1e-05	0.00384182	0.00397145	7.67574e-06	3.54188e-05		(1,1,0)	-0.04463	1.991	0.9071	0.08463	142.7	4.729	-167.9
0.85	0	0	0.00128444	0.0120752	9.14e-06	1.12e-05	0.00392237	0.00410572	1.10413e-05	3.44713e-05		(1,0,1)	-0.07375	-3.181	-0.314	-1.371	-92.07	-6.66	-3.178
0.9	0	0	0.00124802	0.0127531	8.96e-06	1.22e-05	0.00395822	0.00416545	1.22374e-05	3.44336e-05		(0,2,0)	-0.008684	0.3049	0.04329	0.006516	3.554	0.5702	0.1103
0.95	0	0	0.00121324	0.0133484	8.79e-06	1.33e-05	0.00399531	0.00422728	1.33185e-05	3.43776e-05		(0,1,1)	1	1	1	1	1	1	1
1	0	0	0.00119061	0.0138499	8.63e-06	1.43e-05	0.0040272	0.0043346	1.42574e-05	3.45177e-05		(0,0,2)	0.000258	-0.0293	-0.002398	-0.006257	-0.2022	0.007827	0.0257
1.1	0	0	0.00114274	0.0147318	8.3e-06	1.59e-05	0.00409678	0.00459678	1.59346e-05	3.47029e-05		(3,0,0)	-2.304	-8.552	-5.192	-6.449	431.3	-31.34	3.306
1.2	0	0	0.0011037	0.0154734	7.97e-06	1.74e-05	0.00416574	0.00481395	1.73683e-05	3.4995e-05		(2,1,0)	-0.185	4.339	0.1484	0.195	-21.15	9.557	126.9
1.3	0	0	0.00106911	0.0161224	7.64e-06	1.86e-05	0.00423592	0.00500095	1.8627e-05	3.52948e-05		(2,0,1)	-0.01533	1.442	0.1597	0.8067	56.73	5.463	3.448
1.4	0	0	0.00103561	0.0167029	7.29e-06	1.97e-05	0.00430934	0.00516505	1.97403e-05	3.55019e-05		(1,2,0)	-0.005043	-0.474	-0.06949	0.0007393	-6.566	-0.9899	-0.1905
1.5	0	0	0.00100913	0.0172294	6.95e-06	2.07e-05	0.00438045	0.00531209	2.07492e-05	3.58512e-05		(1,1,1)	1	1	1	1	1	1	1
1.6	0	0	0.000983541	0.0177143	6.6e-06	2.17e-05	0.00445389	0.00544509	2.16603e-05	3.61276e-05		(1,0,2)	-0.0008433	0.03541	0.002664	0.006534	0.2591	-0.01607	-0.03859
1.7	0	0	0.000961758	0.0181678	6.25e-06	2.25e-05	0.00452652	0.00556795	2.25045e-05	3.64531e-05		(0,3,0)	0.000496	0.0005986	0.0001348	-0.0002574	0.03084	0.003453	0.0006882
1.8	0	0	0.000940734	0.0185923	5.9e-06	2.33e-05	0.00460094	0.00568089	2.32743e-05	3.67201e-05		(0,2,1)	1	1	1	1	1	1	1
1.9	0	0	0.000920387	0.0189908	5.53e-06	2.4e-05	0.00467711	0.00578497	2.39747e-05	3.69326e-05		(0,1,2)	1	1	1	1	1	1	1
2	0	0	0.000903573	0.0193731	5.18e-06	2.46e-05	0.00475149	0.00588405	2.46427e-05	3.72129e-05		(0,0,3)	7.7e-06	0.0001557	1.398e-05	3.41e-05	1.397e-05	-3.976e-05	-0.0001501
1.2	0	-4	0.00155838	0.00389792	9.54e-06	1.1e-05	0.00383838	0.00396572	1.16795e-06	3.92243e-05		(4,0,0)	0.02859	1.425	0.5168	1.471	42.24	12.06	7.922
1.3	0	-4	0.00151718	0.00667722	9.31e-06	1.11e-05	0.00388643	0.00404581	3.39788e-06	3.89305e-05		(3,1,0)	0.04103	-2.435	-0.2348	-0.05541	-17.86	-5.814	-31.75
1.4	0	-4	0.00143851	0.0090154	8.9e-06	1.14e-05	0.0039709	0.0041866	6.10168e-06	3.72021e-05		(3,0,1)	0.01778	-0.1035	-0.0171	-0.1415	-10.92	-1.395	-1.155
1.1	0	-3	0.00151374	0.00727244	9.47e-06	1.1e-05	0.00385192	0.00398829	4.05567e-06	3.70892e-05		(2,2,0)	0.01033	0.1712	0.02555	-0.007039	2.717	0.3989	0.06458
1.2	0	-3	0.001407	0.00981288	9.02e-06	1.13e-05	0.00394737	0.00414738	7.2592e-06	3.70222e-05		(2,1,1)	1	1	1	1	1	1	1
1.3	0	-3	0.00133427	0.0114068	8.63e-06	1.15e-05	0.0040291	0.00428359	9.66792e-06	3.61176e-05		(2,0,2)	0.0003838	-0.008908	-0.0004854	-0.001091	-0.07202	0.008952	0.01484
1.4	0	-3	0.00128809	0.012536	8.3e-06	1.17e-05	0.00409726	0.00439719	1.15374e-05	3.50887e-05		(1,3,0)	-0.000422	0.0001788	1.195e-05	0.000329	-0.01245	-0.001432	0.0003719
0.9	0	-2	0.00156221	0.00570592	9.77e-06	1.09e-05	0.00378855	0.00388268	2.52526e-06	3.96416e-05		(1,2,1)	1	1	1	1	1	1	1
1	0	-2	0.00143474	0.0092311	9.33e-06	1.11e-05	0.00388073	0.0040363	6.50081e-06	3.62383e-05		(1,1,2)	1	1	1	1	1	1	1
1.1	0	-2	0.00133757	0.0114256	8.92e-06	1.14e-05	0.00396819	0.00418208	9.80489e-06	3.58718e-05		(1,0,3)	-3.988e-06	-0.0001066	-9.419e-06	-2.101e-05	-0.0001781	3.697e-05	0.0001222
1.2	0	-2	0.00126938	0.012722	8.54e-06	1.2e-05	0.00404646	0.00431252	1.19891e-05	3.53166e-05		(0,4,0)	4.238e-07	-1.19e-05	-2.165e-06	-2.299e-06	-0.0002134	-2.416e-05	-1.677e-05
1.3	0	-2	0.00121993	0.0136637	8.2e-06	1.37e-05	0.00411829	0.00443223	1.3656e-05	3.51969e-05		(0,3,1)	1	1	1	1	1	1	1
1.4	0	-2	0.00123537	0.0143448	8.09e-06	1.5e-05	0.00414154	0.004471	1.49903e-05	3.47385e-05		(0,2,2)	1	1	1	1	1	1	1
0.8	0	-1	0.00156094	0.00501287	9.85e-06	1.08e-05	0.00377348	0.00385755	1.95438e-06	3.88343e-05		(0,1,3)	1	1	1	1	1	1	1
0.9	0	-1	0.0014201	0.0100157	9.41e-06	1.11e-05	0.00386529	0.00401059	7.67405e-06	3.73638e-05		(0,0,4)	-3.025e-08	-2.286e-07	-2.096e-08	-5.661e-08	1.381e-06	1.043e-08	1.61e-07
1	0	-1	0.00130094	0.0120772	8.95e-06	1.13e-05	0.003961	0.0041701	1.09693e-05	3.56275e-05
1.1	0	-1	0.00123329	0.0134209	8.59e-06	1.34e-05	0.00403702	0.00429679	1.33648e-05	3.50929e-05
1.2	0	-1	0.00118417	0.0142958	8.25e-06	1.5e-05	0.0041078	0.00445863	1.49764e-05	3.51576e-05
1.3	0	-1	0.00114758	0.015031	7.93e-06	1.64e-05	0.00417472	0.00467451	1.63636e-05	3.54508e-05
1.4	0	-1	0.00110778	0.0156915	7.58e-06	1.76e-05	0.00424872	0.00486466	1.76055e-05	3.55247e-05
0.8	0	0	0.0014237	0.00983292	9.53e-06	1.1e-05	0.00383935	0.00396734	7.431e-06	3.75735e-05
0.9	0	0	0.00129018	0.0121795	9.07e-06	1.13e-05	0.00393545	0.00412751	1.12066e-05	3.59424e-05
1	0	0	0.00121673	0.013756	8.71e-06	1.41e-05	0.00401153	0.00430815	1.41038e-05	3.49505e-05
1.1	0	0	0.00117897	0.0146421	8.42e-06	1.58e-05	0.00407287	0.00457348	1.58073e-05	3.51477e-05
1.2	0	0	0.0011168	0.0154321	8.02e-06	1.73e-05	0.00415632	0.00480303	1.73042e-05	3.53374e-05
1.3	0	0	0.00107892	0.0160867	7.67e-06	1.86e-05	0.00422827	0.00499147	1.85691e-05	3.55678e-05
1.4	0	0	0.00104985	0.016666	7.34e-06	1.97e-05	0.00429738	0.00515622	1.96938e-05	3.5937e-05
0.7	0	1	0.00151202	0.00827945	9.82e-06	1.08e-05	0.00377826	0.00386552	5.32677e-06	4.07445e-05
0.8	0	1	0.00133377	0.011664	9.33e-06	1.11e-05	0.00388252	0.00403929	1.03757e-05	3.70101e-05
0.9	0	1	0.00120751	0.0137373	8.86e-06	1.41e-05	0.00398009	0.00430819	1.4144e-05	3.52763e-05
1	0	1	0.00117858	0.0148168	8.6e-06	1.63e-05	0.00403442	0.00463577	1.62969e-05	3.50541e-05
1.1	0	1	0.0011022	0.015629	8.17e-06	1.79e-05	0.00412353	0.00487115	1.78507e-05	3.54193e-05
1.2	0	1	0.00106381	0.016306	7.84e-06	1.92e-05	0.00419447	0.00506677	1.91913e-05	3.57229e-05
1.3	0	1	0.00103053	0.0169081	7.49e-06	2.04e-05	0.00426602	0.005238	2.03801e-05	3.60579e-05
1.4	0	1	0.00100062	0.0174577	7.15e-06	2.15e-05	0.00433873	0.00539185	2.1456e-05	3.63609e-05
0.7	0	2	0.00139654	0.010588	9.59e-06	1.1e-05	0.00382676	0.00394636	8.63567e-06	3.90774e-05
0.8	0	2	0.00124563	0.0131349	9.12e-06	1.31e-05	0.00392482	0.00412927	1.30585e-05	3.60914e-05
0.9	0	2	0.00115078	0.0148233	8.71e-06	1.64e-05	0.00401073	0.00464257	1.63796e-05	3.52353e-05
1	0	2	0.0011823	0.0155838	8.61e-06	1.8e-05	0.00403219	0.00487621	1.80349e-05	3.54155e-05
1.1	0	2	0.00105148	0.0164136	8.02e-06	1.96e-05	0.00415701	0.00510834	1.95728e-05	3.56763e-05
1.2	0	2	0.00101781	0.0170295	7.68e-06	2.08e-05	0.00422759	0.00528418	2.08121e-05	3.61011e-05
1.3	0	2	0.000984342	0.0176062	7.32e-06	2.2e-05	0.00430204	0.00544604	2.19608e-05	3.63853e-05
1.4	0	2	0.000958657	0.0181351	6.98e-06	2.3e-05	0.00437398	0.00559285	2.30136e-05	3.68009e-05
0.7	0	3	0.00132004	0.0119015	9.44e-06	1.11e-05	0.00385889	0.00399991	1.08483e-05	3.85014e-05
0.8	0	3	0.00121511	0.0143156	9.05e-06	1.55e-05	0.00393947	0.00449756	1.54713e-05	3.55244e-05
0.9	0	3	0.00109553	0.0155873	8.57e-06	1.8e-05	0.00404056	0.00487554	1.80164e-05	3.52242e-05
1	0	3	0.00123556	0.0161974	8.76e-06	1.96e-05	0.00400023	0.00507526	1.95935e-05	3.57356e-05
1.1	0	3	0.00131911	0.0167444	8.86e-06	2.1e-05	0.00398038	0.00525119	2.1013e-05	3.61078e-05
1.2	0	3	0.000977743	0.0176584	7.54e-06	2.23e-05	0.00425644	0.00547264	2.22659e-05	3.64753e-05
1.3	0	3	0.000948535	0.0182166	7.19e-06	2.34e-05	0.00432997	0.00562828	2.33971e-05	3.68754e-05
1.4	0	3	0.000923259	0.0187242	6.84e-06	2.44e-05	0.00440371	0.00576743	2.44085e-05	3.72787e-05
0.7	0	4	0.00124243	0.0130867	9.28e-06	1.3e-05	0.00389149	0.00412017	1.30402e-05	3.78382e-05
0.8	0	4	0.00123644	0.0151774	9.1e-06	1.74e-05	0.00392923	0.00477047	1.74219e-05	3.54847e-05
0.9	0	4	0.00105717	0.0161784	8.47e-06	1.93e-05	0.00406127	0.0050559	1.9338e-05	3.56088e-05
1	0	4	0.00135182	0.016659	9.1e-06	2.1e-05	0.00393048	0.00523585	2.09845e-05	3.60374e-05
1.1	0	4	0.000977244	0.0175975	7.78e-06	2.23e-05	0.00420601	0.0054654	2.23069e-05	3.65291e-05
1.2	0	4	0.000943055	0.0182064	7.42e-06	2.36e-05	0.00428141	0.00563657	2.35674e-05	3.68645e-05
1.3	0	4	0.000914961	0.0187397	7.06e-06	2.46e-05	0.00435616	0.0057836	2.4649e-05	3.72696e-05
1.4	0	4	0.00089167	0.0192324	6.71e-06	2.56e-05	0.00443025	0.00591748	2.5635e-05	3.77176e-05
0.7	0	5	0.0011571	0.0142243	9.11e-06	1.53e-05	0.00392732	0.00447125	1.53076e-05	3.68376e-05
0.8	0	5	0.00130402	0.0158025	9.26e-06	1.9e-05	0.0038968	0.00497403	1.8996e-05	3.55691e-05
0.9	0	5	0.00102229	0.0167336	8.38e-06	2.06e-05	0.00408011	0.00522514	2.06195e-05	3.59613e-05
1	0	5	0.0015415	0.0169659	9.64e-06	2.22e-05	0.00381667	0.00535927	2.2213e-05	3.6339e-05
1.1	0	5	0.000942896	0.0180946	7.67e-06	2.35e-05	0.00422868	0.0056144	2.34923e-05	3.68212e-05
1.2	0	5	0.000913485	0.0186843	7.32e-06	2.47e-05	0.0043027	0.00577937	2.47299e-05	3.72868e-05
1.3	0	5	0.000885165	0.0191905	6.95e-06	2.57e-05	0.0043794	0.00591701	2.57463e-05	3.76425e-05
1.4	0	5	0.000860533	0.0196595	6.59e-06	2.67e-05	0.0044564	0.00604238	2.6667e-05	3.79991e-05
0.7	0	6	0.00109872	0.0150964	8.99e-06	1.72e-05	0.00395184	0.00474027	1.7167e-05	3.63112e-05
0.8	0	6	0.00142524	0.0162129	9.54e-06	2.02e-05	0.00383861	0.00511639	2.0205e-05	3.57577e-05
0.9	0	6	0.000990855	0.0172448	8.3e-06	2.18e-05	0.00409709	0.00538085	2.18335e-05	3.62919e-05
1.1	0	6	0.000916495	0.0185542	7.59e-06	2.46e-05	0.0042461	0.00575278	2.46264e-05	3.72757e-05
1.2	0	6	0.000886355	0.0190993	7.23e-06	2.58e-05	0.00432223	0.0059029	2.57537e-05	3.7661e-05
1.3	0	6	0.000859107	0.0195886	6.86e-06	2.67e-05	0.00439973	0.00603466	2.67323e-05	3.80216e-05
1.4	0	6	0.000838152	0.0200625	6.5e-06	2.77e-05	0.0044752	0.0061615	2.76829e-05	3.85067e-05
0.7	0	7	0.00106219	0.0158007	8.92e-06	1.88e-05	0.00396718	0.00495811	1.87551e-05	3.62704e-05
0.9	0	7	0.000962698	0.0176957	8.23e-06	2.29e-05	0.00411229	0.00551791	2.29287e-05	3.66174e-05
1.1	0	7	0.000891406	0.0189592	7.51e-06	2.56e-05	0.00426266	0.00587426	2.56396e-05	3.76565e-05
1.2	0	7	0.000861397	0.0194651	7.14e-06	2.67e-05	0.0043402	0.00601144	2.6667e-05	3.79961e-05
1.3	0	7	0.000836871	0.0199538	6.77e-06	2.77e-05	0.00441707	0.00614279	2.76564e-05	3.84432e-05
1.4	0	7	0.000835909	0.0205373	6.49e-06	2.9e-05	0.00447709	0.00630684	2.89995e-05	3.98278e-05
0.7	0	8	0.00103118	0.0164051	8.86e-06	2.02e-05	0.00398021	0.00514482	2.01706e-05	3.62863e-05
0.9	0	8	0.000937618	0.0180869	8.16e-06	2.39e-05	0.00412583	0.00563662	2.38969e-05	3.69471e-05
1.1	0	8	0.000867158	0.0193082	7.43e-06	2.65e-05	0.00427867	0.00597837	2.65188e-05	3.79479e-05
1.2	0	8	0.000837323	0.0197886	7.06e-06	2.75e-05	0.00435754	0.00610695	2.74789e-05	3.82575e-05
1.3	0	8	0.000834709	0.0203988	6.77e-06	2.89e-05	0.00441876	0.00627932	2.88952e-05	3.96859e-05
1.4	0	8	0.000833834	0.02099	6.48e-06	3.03e-05	0.00447883	0.00644542	3.02832e-05	4.11144e-05
0.7	0	9	0.00100859	0.0169067	8.81e-06	2.14e-05	0.0039897	0.00529994	2.1387e-05	3.65487e-05
0.9	0	9	0.00091538	0.0184302	8.11e-06	2.48e-05	0.00413784	0.00574066	2.47606e-05	3.72861e-05
1	0	9	0.00313209	0.0167914	1.42e-05	2.6e-05	0.00286231	0.00555141	2.60392e-05	3.76726e-05
1.1	0	9	0.000845123	0.019615	7.36e-06	2.73e-05	0.00429321	0.00606964	2.72994e-05	3.82195e-05
1.2	0	9	0.000833982	0.0201986	7.05e-06	2.86e-05	0.00435994	0.00623287	2.86177e-05	3.93679e-05
1.3	0	9	0.000832695	0.0208248	6.76e-06	3.01e-05	0.00442033	0.00641004	3.01066e-05	4.08986e-05
1.4	0	9	0.00796268	0.0105071	3.51e-05	3.14e-05	-0.0015094	0.00483507	3.14267e-05	4.10166e-05
0.7	0	10	0.000988282	0.0173195	8.77e-06	2.24e-05	0.00399823	0.00542731	2.24101e-05	3.68523e-05
0.9	0	10	0.000890523	0.0187161	8.04e-06	2.55e-05	0.00415127	0.00582638	2.5475e-05	3.74278e-05
1.1	0	10	0.000835121	0.0199541	7.33e-06	2.82e-05	0.00429981	0.00617288	2.82194e-05	3.89448e-05
1.2	0	10	0.000832053	0.020599	7.04e-06	2.98e-05	0.00436133	0.00635606	2.97564e-05	4.05079e-05
1.3	0	10	0.000830806	0.0212337	6.75e-06	3.13e-05	0.0044218	0.00653553	3.12928e-05	4.20834e-05
1.4	0	10	0.000830073	0.0218395	6.46e-06	3.28e-05	0.00448199	0.00670539	3.27663e-05	4.3597e-05
0.8	0	0	0.00142109	0.00986509	9.53e-06	1.1e-05	0.0038406	0.00396943	7.47802e-06	3.75057e-05
0.9	0	0	0.00128307	0.0122307	9.05e-06	1.13e-05	0.00393929	0.00413391	1.12934e-05	3.57382e-05
1	0	0	0.00121641	0.0137576	8.71e-06	1.41e-05	0.00401172	0.00430863	1.41067e-05	3.49398e-05
1.1	0	0	0.00121392	0.01452	8.53e-06	1.56e-05	0.0040498	0.00453988	1.56081e-05	3.64268e-05
1.2	0	0	0.00119819	0.0152179	8.3e-06	1.7e-05	0.00409771	0.00474825	1.70006e-05	3.78124e-05
1.3	0	0	0.00119447	0.0158546	8.11e-06	1.83e-05	0.00413814	0.00493836	1.83228e-05	3.91845e-05
1.4	0	0	0.0011914	0.0164441	7.91e-06	1.96e-05	0.00417847	0.00511316	1.95722e-05	4.04997e-05
0.8	0.5	0	0.0014395	0.00941396	9.57e-06	1.1e-05	0.00383177	0.0039547	6.82054e-06	3.75923e-05
0.9	0.5	0	0.00129961	0.0119424	9.1e-06	1.13e-05	0.00393036	0.00411903	1.07844e-05	3.58747e-05
1	0.5	0	0.00122645	0.0135397	8.74e-06	1.37e-05	0.0040057	0.00424459	1.36778e-05	3.49836e-05
1.1	0.5	0	0.0012137	0.0143697	8.53e-06	1.53e-05	0.00404995	0.00449285	1.52862e-05	3.61262e-05
1.2	0.5	0	0.00119976	0.0150619	8.3e-06	1.67e-05	0.00409658	0.00469981	1.66572e-05	3.75044e-05
1.3	0.5	0	0.00119604	0.0156984	8.11e-06	1.8e-05	0.00413692	0.00488997	1.79674e-05	3.88639e-05
1.4	0.5	0	0.0013218	0.0161185	8.44e-06	1.92e-05	0.00406894	0.0050355	1.91691e-05	3.94526e-05
0.8	1	0	0.00145973	0.00895323	9.61e-06	1.09e-05	0.00382205	0.00393852	6.18005e-06	3.77219e-05
0.9	1	0	0.00131745	0.0116787	9.14e-06	1.12e-05	0.00392073	0.00410297	1.03311e-05	3.60623e-05
1	1	0	0.0012363	0.0133397	8.77e-06	1.33e-05	0.00399979	0.00423474	1.32906e-05	3.50528e-05
1.1	1	0	0.00121368	0.0142401	8.53e-06	1.5e-05	0.00404996	0.00445233	1.50117e-05	3.58726e-05
1.2	1	0	0.00120111	0.0149282	8.31e-06	1.64e-05	0.00409561	0.00465829	1.63656e-05	3.72434e-05
1.3	1	0	0.00119739	0.0155646	8.12e-06	1.77e-05	0.00413587	0.00484848	1.76655e-05	3.85925e-05
1.4	1	0	0.00131445	0.0159963	8.41e-06	1.89e-05	0.00407511	0.00499599	1.8859e-05	3.91794e-05
0.8	1.5	0	0.00147489	0.00858109	9.65e-06	1.09e-05	0.00381478	0.00392639	5.68441e-06	3.77721e-05
0.9	1.5	0	0.00133203	0.0114832	9.18e-06	1.12e-05	0.00391285	0.00408985	1.00021e-05	3.62062e-05
1	1.5	0	0.00124268	0.0131829	8.78e-06	1.3e-05	0.00399596	0.00422836	1.29889e-05	3.50512e-05
1.1	1.5	0	0.00121377	0.0141336	8.53e-06	1.48e-05	0.0040499	0.00441906	1.47883e-05	3.56686e-05
1.2	1.5	0	0.00120221	0.0148191	8.31e-06	1.61e-05	0.00409482	0.00462439	1.61294e-05	3.70323e-05
1.3	1.5	0	0.00119849	0.0154552	8.12e-06	1.74e-05	0.00413501	0.0048146	1.74208e-05	3.83731e-05
1.4	1.5	0	0.00130882	0.0158959	8.38e-06	1.86e-05	0.00407984	0.00496364	1.86077e-05	3.89586e-05
0.8	2	0	0.00149037	0.00822747	9.68e-06	1.09e-05	0.00380735	0.003914	5.23257e-06	3.78852e-05
0.9	2	0	0.00134238	0.0113432	9.21e-06	1.12e-05	0.00390726	0.00408053	9.76944e-06	3.62936e-05
1	2	0	0.00124967	0.0130481	8.8e-06	1.27e-05	0.00399177	0.00422137	1.2734e-05	3.51152e-05
1.1	2	0	0.0012139	0.0140525	8.53e-06	1.46e-05	0.00404981	0.00439371	1.46192e-05	3.55157e-05
1.2	2	0	0.00120304	0.0147363	8.31e-06	1.6e-05	0.00409422	0.00459869	1.59515e-05	3.68734e-05
1.3	2	0	0.00119932	0.0153723	8.12e-06	1.72e-05	0.00413436	0.00478891	1.72364e-05	3.8208e-05
1.4	2	0	0.00130477	0.0158196	8.37e-06	1.84e-05	0.00408325	0.00493907	1.84183e-05	3.87925e-05
0.8	2.5	0	0.00150572	0.00789724	9.72e-06	1.09e-05	0.00379998	0.00390173	4.82735e-06	3.80676e-05
0.9	2.5	0	0.00134794	0.0112529	9.22e-06	1.12e-05	0.00390426	0.00407553	9.61966e-06	3.63166e-05
1	2.5	0	0.00125478	0.0129542	8.82e-06	1.26e-05	0.0039887	0.00421626	1.25583e-05	3.51709e-05
1.1	2.5	0	0.00121402	0.0139985	8.53e-06	1.45e-05	0.00404973	0.00437684	1.45073e-05	3.54153e-05
1.2	2.5	0	0.00120359	0.0146815	8.32e-06	1.58e-05	0.00409383	0.00458167	1.58342e-05	3.67687e-05
1.3	2.5	0	0.00119988	0.0153173	8.13e-06	1.71e-05	0.00413393	0.00477187	1.71146e-05	3.80991e-05
1.4	2.5	0	0.00130218	0.0157688	8.36e-06	1.83e-05	0.00408542	0.00492276	1.82933e-05	3.8683e-05
0.8	3	0	0.0015064	0.00784339	9.72e-06	1.09e-05	0.00379965	0.00390118	4.76203e-06	3.80156e-05
0.9	3	0	0.00135303	0.0111916	9.23e-06	1.12e-05	0.00390151	0.00407095	9.51994e-06	3.63933e-05
1	3	0	0.00125504	0.0129243	8.82e-06	1.25e-05	0.00398854	0.004216	1.25007e-05	3.51297e-05
1.1	3	0	0.00121409	0.0139729	8.53e-06	1.45e-05	0.00404969	0.00436885	1.44544e-05	3.53681e-05
1.2	3	0	0.00120385	0.0146556	8.32e-06	1.58e-05	0.00409364	0.00457363	1.57789e-05	3.67193e-05
1.3	3	0	0.00120014	0.0152914	8.13e-06	1.71e-05	0.00413372	0.00476383	1.70573e-05	3.8048e-05
1.4	3	0	0.00130099	0.0157447	8.35e-06	1.82e-05	0.00408642	0.00491503	1.82343e-05	3.86314e-05
0.8	3.5	0	0.00150631	0.00785074	9.72e-06	1.09e-05	0.0037997	0.00390126	4.77092e-06	3.80226e-05
1.4	0	-4	0.00143564	0.00905753	8.89e-06	1.14e-05	0.00397331	0.00419062	6.15621e-06	3.71182e-05
1.3	0	-3	0.00133828	0.0113658	8.64e-06	1.15e-05	0.00402598	0.00427839	9.6038e-06	3.62371e-05
1.4	0	-3	0.00128774	0.012539	8.3e-06	1.17e-05	0.00409755	0.00439767	1.15423e-05	3.50774e-05
1.3	0	-2	0.00121957	0.0136656	8.2e-06	1.37e-05	0.00411856	0.0044327	1.36592e-05	3.51865e-05
1.4	0	-2	0.00121299	0.0142727	8e-06	1.48e-05	0.00416034	0.00450232	1.47914e-05	3.62474e-05
1.3	0	-1	0.00120476	0.0148325	8.14e-06	1.61e-05	0.00413012	0.0046216	1.60591e-05	3.71597e-05
1.4	0	-1	0.00128252	0.0153162	8.28e-06	1.72e-05	0.00410193	0.00477807	1.72083e-05	3.77375e-05
1.3	0	0	0.00119447	0.0158546	8.11e-06	1.83e-05	0.00413814	0.00493836	1.83228e-05	3.91845e-05
1.4	0	0	0.0011914	0.0164441	7.91e-06	1.96e-05	0.00417847	0.00511316	1.95722e-05	4.04997e-05
1.3	0	1	0.0011854	0.0167718	8.07e-06	2.05e-05	0.00414522	0.00522247	2.04787e-05	4.11598e-05
1.4	0	1	0.00118249	0.0173643	7.88e-06	2.18e-05	0.00418596	0.00539759	2.17957e-05	4.25516e-05
1.3	0	2	0.00117755	0.0176004	8.04e-06	2.25e-05	0.00415134	0.00547903	2.25279e-05	4.30891e-05
1.4	0	2	0.00117479	0.0181999	7.85e-06	2.39e-05	0.00419243	0.00565577	2.39169e-05	4.45509e-05
1.3	0	3	0.00117076	0.0183586	8.02e-06	2.45e-05	0.00415664	0.00571377	2.4488e-05	4.4969e-05
1.4	0	3	0.00116815	0.018967	7.82e-06	2.6e-05	0.00419801	0.00589275	2.59502e-05	4.64972e-05
1.3	0	4	0.00116481	0.0190625	7.99e-06	2.64e-05	0.00416128	0.00593167	2.63804e-05	4.67972e-05
1.4	0	4	0.00177565	0.0187779	1.03e-05	2.79e-05	0.0036877	0.0059662	2.78539e-05	4.73831e-05
1.3	0	5	0.0011595	0.0197231	7.97e-06	2.82e-05	0.00416542	0.00613616	2.82203e-05	4.85742e-05
1.4	0	5	0.00115714	0.0203477	7.78e-06	2.98e-05	0.00420725	0.00631924	2.98179e-05	5.02305e-05
1.3	0	6	0.0011547	0.0203471	7.96e-06	3e-05	0.00416916	0.00632927	3.00144e-05	5.03026e-05
1.4	0	6	0.00115243	0.0209784	7.76e-06	3.17e-05	0.00421121	0.00651401	3.16731e-05	5.20213e-05
1.3	0	7	0.00115031	0.020938	7.94e-06	3.18e-05	0.00417259	0.00651215	3.17642e-05	5.19857e-05
1.4	0	7	0.00114812	0.0215756	7.74e-06	3.35e-05	0.00421483	0.00669843	3.34811e-05	5.37653e-05
1.3	0	8	0.00114627	0.0214985	7.93e-06	3.35e-05	0.00417574	0.00668557	3.34691e-05	5.36264e-05
1.4	0	8	0.00114415	0.0221423	7.72e-06	3.52e-05	0.00421817	0.00687339	3.52425e-05	5.5465e-05
1.3	0	9	0.00114256	0.0220305	7.91e-06	3.51e-05	0.00417864	0.00685015	3.51282e-05	5.5227e-05
1.4	0	9	0.00114049	0.0226806	7.71e-06	3.7e-05	0.00422124	0.00703959	3.69573e-05	5.71232e-05
1.3	0	10	0.00113913	0.022536	7.9e-06	3.67e-05	0.00418131	0.00700656	3.67419e-05	5.67898e-05
1.4	0	10	0.00113713	0.0231928	7.69e-06	3.86e-05	0.00422406	0.0071977	3.86264e-05	5.87422e-05

## Sheet: （20，25.4）
																					whole potentials of the equilibrium droplet		the unit length energy barrier
0	0	0	0.00182368	0	1.04e-05	1.04e-05	0.00364736	0.00364736	0	4.17933e-05		(0,0,0)	-5.107	0.8942	7.809	0.6655	-1723	25.43	-28.19		2.843e-06		5.6e-06
0.2	0	0	0.00171565	0.00492731	1.04e-05	1.05e-05	0.00366032	0.00366897	1.92744e-06	4.01794e-05		(1,0,0)	3.367	4.174	-13.57	3.253	3834	14.25	141
0.4	0	0	0.00161385	0.00653132	1.02e-05	1.06e-05	0.00369772	0.00373129	3.36359e-06	3.88595e-05		(0,1,0)	0.2399	-4.303	-0.8701	-0.265	-106	-9.041	73.91
0.6	0	0	0.00151205	0.00763096	9.91e-06	1.08e-05	0.00375955	0.00383434	4.54034e-06	3.76752e-05		(0,0,1)	0.08455	1.838	0.1637	0.7028	48.3	2.581	0.8905
0.7	0	0	0.00145969	0.00837665	9.72e-06	1.09e-05	0.00380024	0.00390215	5.43099e-06	3.6239e-05		(2,0,0)	6.684	11.93	13.98	6.074	-2513	1.634	-87.87
0.75	0	0	0.00139132	0.00999085	9.52e-06	1.1e-05	0.00384192	0.00397163	7.66807e-06	3.53834e-05		(1,1,0)	-0.04463	1.991	0.9071	0.08463	142.7	4.729	-167.9
0.85	0	0	0.00128423	0.0120693	9.13e-06	1.12e-05	0.00392248	0.0041059	1.10303e-05	3.44368e-05		(1,0,1)	-0.07375	-3.181	-0.314	-1.371	-92.07	-6.66	-3.178
0.9	0	0	0.00124782	0.0127469	8.96e-06	1.22e-05	0.00395833	0.00416564	1.22252e-05	3.43991e-05		(0,2,0)	-0.008684	0.3049	0.04329	0.006516	3.554	0.5702	0.1103
0.95	0	0	0.00121304	0.0133418	8.79e-06	1.33e-05	0.00399543	0.00422747	1.33052e-05	3.43432e-05		(0,1,1)	1	1	1	1	1	1	1
1	0	0	0.00119041	0.0138431	8.63e-06	1.42e-05	0.00402732	0.00433244	1.42431e-05	3.44831e-05		(0,0,2)	0.000258	-0.0293	-0.002398	-0.006257	-0.2022	0.007827	0.0257
1.1	0	0	0.00114255	0.0147246	8.3e-06	1.59e-05	0.00409691	0.00459452	1.59187e-05	3.46682e-05		(3,0,0)	-2.304	-8.552	-5.192	-6.449	431.3	-31.34	3.306
1.2	0	0	0.00110352	0.0154658	7.97e-06	1.74e-05	0.00416587	0.00481156	1.73509e-05	3.496e-05		(2,1,0)	-0.185	4.339	0.1484	0.195	-21.15	9.557	126.9
1.3	0	0	0.00106894	0.0161146	7.64e-06	1.86e-05	0.00423606	0.00499848	1.86084e-05	3.52595e-05		(2,0,1)	-0.01533	1.442	0.1597	0.8067	56.73	5.463	3.448
1.4	0	0	0.00103544	0.0166948	7.29e-06	1.97e-05	0.00430948	0.0051625	1.97206e-05	3.54664e-05		(1,2,0)	-0.005043	-0.474	-0.06949	0.0007393	-6.566	-0.9899	-0.1905
1.5	0	0	0.00100897	0.017221	6.95e-06	2.07e-05	0.0043806	0.00530948	2.07285e-05	3.58153e-05		(1,1,1)	1	1	1	1	1	1	1
1.6	0	0	0.000983378	0.0177057	6.6e-06	2.16e-05	0.00445405	0.0054424	2.16386e-05	3.60914e-05		(1,0,2)	-0.0008433	0.03541	0.002664	0.006534	0.2591	-0.01607	-0.03859
1.7	0	0	0.000961599	0.018159	6.25e-06	2.25e-05	0.00452668	0.00556521	2.2482e-05	3.64167e-05		(0,3,0)	0.000496	0.0005986	0.0001348	-0.0002574	0.03084	0.003453	0.0006882
1.8	0	0	0.000940579	0.0185832	5.89e-06	2.33e-05	0.00460111	0.00567809	2.3251e-05	3.66834e-05		(0,2,1)	1	1	1	1	1	1	1
1.9	0	0	0.000920235	0.0189815	5.53e-06	2.4e-05	0.00467729	0.00578212	2.39507e-05	3.68957e-05		(0,1,2)	1	1	1	1	1	1	1
2	0	0	0.000903424	0.0193637	5.18e-06	2.46e-05	0.00475167	0.00588115	2.46181e-05	3.71757e-05		(0,0,3)	7.7e-06	0.0001557	1.398e-05	3.41e-05	1.397e-05	-3.976e-05	-0.0001501
1.2	0	-4	0.00155812	0.00389603	9.54e-06	1.1e-05	0.00383856	0.00396603	1.16678e-06	3.9185e-05		(4,0,0)	0.02859	1.425	0.5168	1.471	42.24	12.06	7.922
1.3	0	-4	0.00151693	0.00667399	9.31e-06	1.11e-05	0.00388662	0.00404613	3.39448e-06	3.88915e-05		(3,1,0)	0.04103	-2.435	-0.2348	-0.05541	-17.86	-5.814	-31.75
1.4	0	-4	0.00143827	0.00901104	8.9e-06	1.14e-05	0.0039711	0.00418693	6.09557e-06	3.71649e-05		(3,0,1)	0.01778	-0.1035	-0.0171	-0.1415	-10.92	-1.395	-1.155
1.1	0	-3	0.00151349	0.00726891	9.47e-06	1.1e-05	0.00385208	0.00398857	4.05161e-06	3.70521e-05		(2,2,0)	0.01033	0.1712	0.02555	-0.007039	2.717	0.3989	0.06458
1.2	0	-3	0.00140676	0.00980813	9.02e-06	1.13e-05	0.00394754	0.00414766	7.25195e-06	3.69852e-05		(2,1,1)	1	1	1	1	1	1	1
1.3	0	-3	0.00133405	0.0114013	8.62e-06	1.15e-05	0.00402927	0.00428388	9.65825e-06	3.60815e-05		(2,0,2)	0.0003838	-0.008908	-0.0004854	-0.001091	-0.07202	0.008952	0.01484
1.4	0	-3	0.00128787	0.0125299	8.3e-06	1.17e-05	0.00409744	0.00439749	1.15258e-05	3.50536e-05		(1,3,0)	-0.000422	0.0001788	1.195e-05	0.000329	-0.01245	-0.001432	0.0003719
0.9	0	-2	0.00156196	0.00570315	9.77e-06	1.09e-05	0.00378869	0.00388291	2.52274e-06	3.9602e-05		(1,2,1)	1	1	1	1	1	1	1
1	0	-2	0.0014345	0.00922661	9.33e-06	1.11e-05	0.00388087	0.00403654	6.49431e-06	3.62021e-05		(1,1,2)	1	1	1	1	1	1	1
1.1	0	-2	0.00133735	0.01142	8.92e-06	1.14e-05	0.00396834	0.00418233	9.79507e-06	3.58359e-05		(1,0,3)	-3.988e-06	-0.0001066	-9.419e-06	-2.101e-05	-0.0001781	3.697e-05	0.0001222
1.2	0	-2	0.00126917	0.0127158	8.54e-06	1.2e-05	0.0040466	0.00431277	1.19771e-05	3.52813e-05		(0,4,0)	4.238e-07	-1.19e-05	-2.165e-06	-2.299e-06	-0.0002134	-2.416e-05	-1.677e-05
1.3	0	-2	0.00121973	0.013657	8.2e-06	1.36e-05	0.00411844	0.0044325	1.36423e-05	3.51617e-05		(0,3,1)	1	1	1	1	1	1	1
1.4	0	-2	0.00123517	0.0143378	8.09e-06	1.5e-05	0.00414171	0.00447128	1.49753e-05	3.47038e-05		(0,2,2)	1	1	1	1	1	1	1
0.8	0	-1	0.00156068	0.00501042	9.85e-06	1.08e-05	0.0037736	0.00385776	1.95243e-06	3.87955e-05		(0,1,3)	1	1	1	1	1	1	1
0.9	0	-1	0.00141986	0.0100108	9.41e-06	1.11e-05	0.00386542	0.0040108	7.66638e-06	3.73264e-05		(0,0,4)	-3.025e-08	-2.286e-07	-2.096e-08	-5.661e-08	1.381e-06	1.043e-08	1.61e-07
1	0	-1	0.00130073	0.0120713	8.95e-06	1.13e-05	0.00396113	0.00417031	1.09583e-05	3.55918e-05
1.1	0	-1	0.00123308	0.0134144	8.59e-06	1.34e-05	0.00403715	0.00429702	1.33515e-05	3.50578e-05
1.2	0	-1	0.00118398	0.0142889	8.25e-06	1.5e-05	0.00410794	0.00445644	1.49615e-05	3.51225e-05
1.3	0	-1	0.00114738	0.0150236	7.93e-06	1.63e-05	0.00417487	0.0046722	1.63472e-05	3.54154e-05
1.4	0	-1	0.0011076	0.0156839	7.58e-06	1.76e-05	0.00424887	0.00486226	1.75879e-05	3.54892e-05
0.8	0	0	0.00142347	0.00982811	9.53e-06	1.1e-05	0.00383946	0.00396753	7.42357e-06	3.7536e-05
0.9	0	0	0.00128997	0.0121735	9.07e-06	1.13e-05	0.00393556	0.0041277	1.11954e-05	3.59065e-05
1	0	0	0.00121653	0.0137492	8.71e-06	1.41e-05	0.00401165	0.004306	1.40896e-05	3.49155e-05
1.1	0	0	0.00117878	0.0146349	8.42e-06	1.58e-05	0.004073	0.00457121	1.57914e-05	3.51125e-05
1.2	0	0	0.00111661	0.0154246	8.02e-06	1.73e-05	0.00415645	0.00480066	1.72869e-05	3.53021e-05
1.3	0	0	0.00107874	0.0160788	7.67e-06	1.86e-05	0.00422841	0.004989	1.85505e-05	3.55323e-05
1.4	0	0	0.00104968	0.0166579	7.34e-06	1.97e-05	0.00429752	0.00515368	1.96741e-05	3.59011e-05
0.7	0	1	0.00151177	0.00827538	9.82e-06	1.08e-05	0.00377836	0.0038657	5.32144e-06	4.07037e-05
0.8	0	1	0.00133355	0.0116583	9.33e-06	1.11e-05	0.00388262	0.00403946	1.03654e-05	3.69731e-05
0.9	0	1	0.00120731	0.0137306	8.86e-06	1.41e-05	0.0039802	0.00430606	1.41299e-05	3.52411e-05
1	0	1	0.00117839	0.0148095	8.6e-06	1.63e-05	0.00403454	0.00463347	1.62806e-05	3.50191e-05
1.1	0	1	0.00110202	0.0156214	8.17e-06	1.78e-05	0.00412365	0.00486874	1.78329e-05	3.53839e-05
1.2	0	1	0.00106363	0.016298	7.84e-06	1.92e-05	0.00419459	0.00506426	1.91721e-05	3.56871e-05
1.3	0	1	0.00103036	0.0168998	7.49e-06	2.04e-05	0.00426615	0.00523541	2.03597e-05	3.60219e-05
1.4	0	1	0.00100046	0.0174492	7.15e-06	2.14e-05	0.00433886	0.00538919	2.14346e-05	3.63246e-05
0.7	0	2	0.00139631	0.0105828	9.59e-06	1.1e-05	0.00382686	0.00394652	8.62704e-06	3.90383e-05
0.8	0	2	0.00124542	0.0131284	9.12e-06	1.3e-05	0.00392492	0.00412722	1.30454e-05	3.60554e-05
0.9	0	2	0.00115059	0.014816	8.71e-06	1.64e-05	0.00401083	0.00464027	1.63632e-05	3.52e-05
1	0	2	0.0011821	0.0155761	8.61e-06	1.8e-05	0.00403231	0.00487379	1.80168e-05	3.538e-05
1.1	0	2	0.00105131	0.0164055	8.01e-06	1.96e-05	0.00415713	0.00510581	1.95532e-05	3.56405e-05
1.2	0	2	0.00101764	0.0170212	7.68e-06	2.08e-05	0.00422771	0.00528157	2.07913e-05	3.6065e-05
1.3	0	2	0.000984179	0.0175976	7.32e-06	2.19e-05	0.00430217	0.00544334	2.19388e-05	3.63489e-05
1.4	0	2	0.000958499	0.0181262	6.98e-06	2.3e-05	0.00437411	0.00559007	2.29905e-05	3.67641e-05
0.7	0	3	0.00131982	0.0118957	9.44e-06	1.11e-05	0.00385898	0.00400006	1.08375e-05	3.84629e-05
0.8	0	3	0.00121492	0.0143086	9.05e-06	1.55e-05	0.00393957	0.00449534	1.54559e-05	3.54889e-05
0.9	0	3	0.00109535	0.0155797	8.57e-06	1.8e-05	0.00404066	0.00487313	1.79984e-05	3.5189e-05
1	0	3	0.00123536	0.0161895	8.76e-06	1.96e-05	0.00400035	0.00507275	1.95739e-05	3.56999e-05
1.1	0	3	0.00131889	0.0167362	8.86e-06	2.1e-05	0.00398052	0.0052486	2.0992e-05	3.60716e-05
1.2	0	3	0.000977582	0.0176497	7.54e-06	2.22e-05	0.00425655	0.00546994	2.22437e-05	3.64388e-05
1.3	0	3	0.000948378	0.0182077	7.19e-06	2.34e-05	0.0043301	0.00562548	2.33736e-05	3.68385e-05
1.4	0	3	0.000923107	0.018715	6.84e-06	2.44e-05	0.00440384	0.00576458	2.43841e-05	3.72415e-05
0.7	0	4	0.00124222	0.0130803	9.28e-06	1.3e-05	0.00389157	0.00411813	1.30272e-05	3.78003e-05
0.8	0	4	0.00123624	0.01517	9.1e-06	1.74e-05	0.00392933	0.00476811	1.74045e-05	3.54492e-05
0.9	0	4	0.001057	0.0161705	8.47e-06	1.93e-05	0.00406137	0.0050534	1.93187e-05	3.55732e-05
1	0	4	0.00135159	0.0166508	9.1e-06	2.1e-05	0.00393061	0.00523326	2.09635e-05	3.60014e-05
1.1	0	4	0.000977082	0.0175888	7.78e-06	2.23e-05	0.00420611	0.00546269	2.22846e-05	3.64926e-05
1.2	0	4	0.0009429	0.0181975	7.42e-06	2.35e-05	0.00428152	0.00563377	2.35438e-05	3.68277e-05
1.3	0	4	0.00091481	0.0187305	7.06e-06	2.46e-05	0.00435628	0.00578073	2.46243e-05	3.72323e-05
1.4	0	4	0.000891523	0.019223	6.71e-06	2.56e-05	0.00443037	0.00591456	2.56094e-05	3.76799e-05
0.7	0	5	0.00115691	0.0142172	9.11e-06	1.53e-05	0.0039274	0.00446902	1.52922e-05	3.68007e-05
0.8	0	5	0.0013038	0.0157947	9.26e-06	1.9e-05	0.0038969	0.00497156	1.8977e-05	3.55335e-05
0.9	0	5	0.00102212	0.0167254	8.38e-06	2.06e-05	0.0040802	0.00522256	2.05989e-05	3.59254e-05
1	0	5	0.00154125	0.0169576	9.64e-06	2.22e-05	0.00381682	0.00535662	2.21907e-05	3.63026e-05
1.1	0	5	0.000942741	0.0180857	7.67e-06	2.35e-05	0.00422878	0.00561163	2.34689e-05	3.67845e-05
1.2	0	5	0.000913334	0.0186751	7.32e-06	2.47e-05	0.00430281	0.0057765	2.47051e-05	3.72495e-05
1.3	0	5	0.000885019	0.0191811	6.95e-06	2.57e-05	0.00437952	0.00591409	2.57206e-05	3.76049e-05
1.4	0	5	0.000860391	0.0196498	6.59e-06	2.66e-05	0.00445652	0.00603939	2.66403e-05	3.79611e-05
0.7	0	6	0.00109854	0.0150889	8.99e-06	1.71e-05	0.00395192	0.00473792	1.71499e-05	3.62749e-05
0.8	0	6	0.00142501	0.0162049	9.53e-06	2.02e-05	0.00383872	0.00511385	2.01848e-05	3.5722e-05
0.9	0	6	0.000990692	0.0172363	8.3e-06	2.18e-05	0.00409717	0.00537817	2.18116e-05	3.62556e-05
1.1	0	6	0.000916344	0.0185451	7.59e-06	2.46e-05	0.0042462	0.00574992	2.46017e-05	3.72383e-05
1.2	0	6	0.000886209	0.0190899	7.23e-06	2.57e-05	0.00432234	0.00589997	2.57279e-05	3.76234e-05
1.3	0	6	0.000858966	0.019579	6.86e-06	2.67e-05	0.00439984	0.00603168	2.67056e-05	3.79836e-05
1.4	0	6	0.000838014	0.0200526	6.5e-06	2.77e-05	0.00447532	0.00615845	2.76552e-05	3.84682e-05
0.7	0	7	0.00106202	0.0157929	8.92e-06	1.87e-05	0.00396726	0.00495565	1.87364e-05	3.62342e-05
0.9	0	7	0.00096254	0.0176869	8.23e-06	2.29e-05	0.00411238	0.00551518	2.29058e-05	3.65808e-05
1.1	0	7	0.000891259	0.0189499	7.51e-06	2.56e-05	0.00426276	0.00587135	2.5614e-05	3.76188e-05
1.2	0	7	0.000861255	0.0194555	7.14e-06	2.66e-05	0.00434031	0.00600847	2.66404e-05	3.79581e-05
1.3	0	7	0.000836733	0.0199441	6.77e-06	2.76e-05	0.00441718	0.00613975	2.76288e-05	3.84048e-05
1.4	0	7	0.000835771	0.0205272	6.49e-06	2.9e-05	0.0044772	0.00630372	2.89705e-05	3.97879e-05
0.7	0	8	0.00103101	0.016397	8.86e-06	2.02e-05	0.00398028	0.00514227	2.01505e-05	3.625e-05
0.9	0	8	0.000937464	0.0180779	8.16e-06	2.39e-05	0.00412592	0.00563382	2.3873e-05	3.69101e-05
1.1	0	8	0.000867015	0.0192987	7.43e-06	2.65e-05	0.00427876	0.00597541	2.64923e-05	3.79099e-05
1.2	0	8	0.000837185	0.0197789	7.06e-06	2.75e-05	0.00435764	0.00610392	2.74514e-05	3.82192e-05
1.3	0	8	0.000834572	0.0203887	6.76e-06	2.89e-05	0.00441886	0.00627621	2.88663e-05	3.96462e-05
1.4	0	8	0.000833696	0.0209797	6.48e-06	3.03e-05	0.00447895	0.00644222	3.02529e-05	4.10733e-05
0.7	0	9	0.00100843	0.0168984	8.81e-06	2.14e-05	0.00398977	0.00529731	2.13656e-05	3.65122e-05
0.9	0	9	0.000915228	0.0184211	8.11e-06	2.47e-05	0.00413792	0.00573782	2.47359e-05	3.72488e-05
1	0	9	0.00313157	0.0167835	1.42e-05	2.6e-05	0.00286262	0.00554872	2.60132e-05	3.7635e-05
1.1	0	9	0.000844984	0.0196053	7.36e-06	2.73e-05	0.0042933	0.00606663	2.72721e-05	3.81812e-05
1.2	0	9	0.000833845	0.0201887	7.05e-06	2.86e-05	0.00436004	0.00622977	2.8589e-05	3.93285e-05
1.3	0	9	0.000832557	0.0208145	6.76e-06	3.01e-05	0.00442044	0.00640686	3.00764e-05	4.08577e-05
1.4	0	9	0.00796137	0.0105038	3.51e-05	3.14e-05	-0.0015083	0.00483297	3.13953e-05	4.09756e-05
0.7	0	10	0.000988118	0.0173109	8.77e-06	2.24e-05	0.0039983	0.00542461	2.23877e-05	3.68154e-05
0.9	0	10	0.000890376	0.0187069	8.04e-06	2.54e-05	0.00415134	0.00582348	2.54495e-05	3.73904e-05
1.1	0	10	0.000834983	0.0199443	7.33e-06	2.82e-05	0.0042999	0.00616982	2.81912e-05	3.89058e-05
1.2	0	10	0.000831916	0.0205889	7.04e-06	2.97e-05	0.00436143	0.0063529	2.97266e-05	4.04674e-05
1.3	0	10	0.000830669	0.0212233	6.75e-06	3.13e-05	0.00442191	0.00653229	3.12615e-05	4.20414e-05
1.4	0	10	0.000829936	0.0218288	6.46e-06	3.27e-05	0.00448211	0.00670208	3.27336e-05	4.35534e-05
0.8	0	0	0.00142085	0.00986026	9.53e-06	1.1e-05	0.00384072	0.00396962	7.47054e-06	3.74681e-05
0.9	0	0	0.00128286	0.0122247	9.05e-06	1.13e-05	0.00393941	0.0041341	1.12821e-05	3.57024e-05
1	0	0	0.00121621	0.0137509	8.71e-06	1.41e-05	0.00401184	0.0043065	1.40926e-05	3.49048e-05
1.1	0	0	0.00121372	0.0145129	8.53e-06	1.56e-05	0.00404993	0.00453763	1.55925e-05	3.63903e-05
1.2	0	0	0.001198	0.0152104	8.3e-06	1.7e-05	0.00409785	0.00474591	1.69836e-05	3.77747e-05
1.3	0	0	0.00119428	0.0158469	8.1e-06	1.83e-05	0.0041383	0.00493592	1.83044e-05	3.91453e-05
1.4	0	0	0.00119121	0.0164361	7.91e-06	1.96e-05	0.00417864	0.00511063	1.95526e-05	4.04592e-05
0.8	0.5	0	0.00143926	0.00940935	9.57e-06	1.1e-05	0.00383188	0.00395489	6.81372e-06	3.75547e-05
0.9	0.5	0	0.00129939	0.0119366	9.1e-06	1.13e-05	0.00393047	0.00411922	1.07736e-05	3.58389e-05
1	0.5	0	0.00122625	0.013533	8.74e-06	1.37e-05	0.00400582	0.00424479	1.36641e-05	3.49487e-05
1.1	0.5	0	0.0012135	0.0143626	8.53e-06	1.53e-05	0.00405008	0.00449062	1.52709e-05	3.60901e-05
1.2	0.5	0	0.00119957	0.0150545	8.3e-06	1.66e-05	0.00409672	0.00469749	1.66405e-05	3.74669e-05
1.3	0.5	0	0.00119584	0.0156908	8.11e-06	1.79e-05	0.00413707	0.00488756	1.79495e-05	3.88251e-05
1.4	0.5	0	0.00132158	0.0161107	8.43e-06	1.91e-05	0.00406913	0.00503302	1.91499e-05	3.94131e-05
0.8	1	0	0.00145949	0.00894885	9.61e-06	1.09e-05	0.00382217	0.00393871	6.17387e-06	3.76842e-05
0.9	1	0	0.00131723	0.011673	9.14e-06	1.12e-05	0.00392084	0.00410317	1.03208e-05	3.60263e-05
1	1	0	0.0012361	0.0133331	8.77e-06	1.33e-05	0.00399991	0.00423494	1.32772e-05	3.50178e-05
1.1	1	0	0.00121348	0.0142331	8.53e-06	1.5e-05	0.0040501	0.00445013	1.49967e-05	3.58367e-05
1.2	1	0	0.00120091	0.0149209	8.31e-06	1.63e-05	0.00409575	0.00465599	1.63492e-05	3.72061e-05
1.3	1	0	0.00119719	0.015557	8.12e-06	1.76e-05	0.00413602	0.0048461	1.76479e-05	3.85539e-05
1.4	1	0	0.00131423	0.0159885	8.41e-06	1.88e-05	0.00407529	0.00499352	1.88401e-05	3.91402e-05
0.8	1.5	0	0.00147465	0.00857689	9.65e-06	1.09e-05	0.0038149	0.00392659	5.67874e-06	3.77344e-05
0.9	1.5	0	0.00133181	0.0114775	9.18e-06	1.12e-05	0.00391297	0.00409004	9.99206e-06	3.61699e-05
1	1.5	0	0.00124248	0.0131765	8.78e-06	1.3e-05	0.00399608	0.00422856	1.29759e-05	3.50161e-05
1.1	1.5	0	0.00121357	0.0141267	8.53e-06	1.48e-05	0.00405003	0.00441688	1.47735e-05	3.56329e-05
1.2	1.5	0	0.00120201	0.0148118	8.31e-06	1.61e-05	0.00409496	0.00462211	1.61133e-05	3.69952e-05
1.3	1.5	0	0.00119829	0.0154477	8.12e-06	1.74e-05	0.00413516	0.00481223	1.74034e-05	3.83347e-05
1.4	1.5	0	0.0013086	0.0158882	8.38e-06	1.86e-05	0.00408002	0.0049612	1.85891e-05	3.89197e-05
0.8	2	0	0.00149013	0.00822344	9.68e-06	1.09e-05	0.00380746	0.0039142	5.22733e-06	3.78473e-05
0.9	2	0	0.00134216	0.0113376	9.21e-06	1.12e-05	0.00390738	0.00408073	9.75966e-06	3.62573e-05
1	2	0	0.00124946	0.0130417	8.8e-06	1.27e-05	0.00399189	0.00422158	1.27213e-05	3.50801e-05
1.1	2	0	0.0012137	0.0140456	8.53e-06	1.46e-05	0.00404994	0.00439154	1.46046e-05	3.54801e-05
1.2	2	0	0.00120284	0.0147292	8.31e-06	1.59e-05	0.00409437	0.00459643	1.59356e-05	3.68365e-05
1.3	2	0	0.00119912	0.0153648	8.12e-06	1.72e-05	0.00413451	0.00478654	1.72191e-05	3.81698e-05
1.4	2	0	0.00130455	0.0158119	8.37e-06	1.84e-05	0.00408343	0.00493664	1.83999e-05	3.87537e-05
0.8	2.5	0	0.00150547	0.00789336	9.72e-06	1.09e-05	0.0038001	0.00390193	4.82251e-06	3.80295e-05
0.9	2.5	0	0.00134772	0.0112474	9.22e-06	1.12e-05	0.00390438	0.00407573	9.61005e-06	3.62803e-05
1	2.5	0	0.00125458	0.0129479	8.82e-06	1.25e-05	0.00398882	0.00421646	1.25457e-05	3.51357e-05
1.1	2.5	0	0.00121382	0.0139917	8.53e-06	1.45e-05	0.00404986	0.00437468	1.44928e-05	3.53799e-05
1.2	2.5	0	0.00120339	0.0146744	8.32e-06	1.58e-05	0.00409397	0.00457942	1.58184e-05	3.67319e-05
1.3	2.5	0	0.00119968	0.0153099	8.12e-06	1.71e-05	0.00413408	0.00476952	1.70975e-05	3.8061e-05
1.4	2.5	0	0.00130197	0.0157612	8.36e-06	1.83e-05	0.0040856	0.00492034	1.8275e-05	3.86443e-05
0.8	3	0	0.00150615	0.00783955	9.72e-06	1.09e-05	0.00379977	0.00390138	4.75727e-06	3.79776e-05
0.9	3	0	0.00135281	0.0111862	9.23e-06	1.12e-05	0.00390163	0.00407115	9.5104e-06	3.63568e-05
1	3	0	0.00125484	0.0129179	8.82e-06	1.25e-05	0.00398867	0.0042162	1.24881e-05	3.50945e-05
1.1	3	0	0.00121389	0.0139661	8.53e-06	1.44e-05	0.00404982	0.0043667	1.444e-05	3.53328e-05
1.2	3	0	0.00120365	0.0146485	8.32e-06	1.58e-05	0.00409378	0.00457138	1.57632e-05	3.66826e-05
1.3	3	0	0.00119994	0.015284	8.13e-06	1.7e-05	0.00413388	0.00476149	1.70403e-05	3.801e-05
1.4	3	0	0.00130077	0.0157371	8.35e-06	1.82e-05	0.0040866	0.00491262	1.82161e-05	3.85928e-05
0.8	3.5	0	0.00150606	0.0078469	9.72e-06	1.09e-05	0.00379982	0.00390146	4.76615e-06	3.79846e-05
1.4	0	-4	0.0014354	0.00905317	8.89e-06	1.14e-05	0.00397351	0.00419095	6.15006e-06	3.70811e-05
1.3	0	-3	0.00133805	0.0113603	8.64e-06	1.15e-05	0.00402615	0.00427867	9.59419e-06	3.62008e-05
1.4	0	-3	0.00128753	0.0125329	8.3e-06	1.17e-05	0.00409772	0.00439797	1.15308e-05	3.50423e-05
1.3	0	-2	0.00121937	0.0136589	8.2e-06	1.36e-05	0.00411872	0.00443296	1.36455e-05	3.51513e-05
1.4	0	-2	0.00121279	0.0142658	8e-06	1.48e-05	0.00416051	0.0045026	1.47766e-05	3.62112e-05
1.3	0	-1	0.00120456	0.0148254	8.14e-06	1.6e-05	0.00413027	0.00461932	1.60431e-05	3.71226e-05
1.4	0	-1	0.00128231	0.0153087	8.28e-06	1.72e-05	0.00410211	0.00477571	1.7191e-05	3.76997e-05
1.3	0	0	0.00119428	0.0158469	8.1e-06	1.83e-05	0.0041383	0.00493592	1.83044e-05	3.91453e-05
1.4	0	0	0.00119121	0.0164361	7.91e-06	1.96e-05	0.00417864	0.00511063	1.95526e-05	4.04592e-05
1.3	0	1	0.0011852	0.0167636	8.07e-06	2.05e-05	0.00414537	0.00521989	2.04582e-05	4.11186e-05
1.4	0	1	0.00118229	0.0173559	7.88e-06	2.18e-05	0.00418613	0.00539493	2.17739e-05	4.25091e-05
1.3	0	2	0.00117735	0.0175918	8.04e-06	2.25e-05	0.0041515	0.00547632	2.25053e-05	4.3046e-05
1.4	0	2	0.00117459	0.0181911	7.85e-06	2.39e-05	0.00419259	0.00565299	2.3893e-05	4.45064e-05
1.3	0	3	0.00117056	0.0183496	8.02e-06	2.45e-05	0.00415679	0.00571095	2.44635e-05	4.49241e-05
1.4	0	3	0.00116795	0.0189578	7.82e-06	2.59e-05	0.00419817	0.00588985	2.59243e-05	4.64507e-05
1.3	0	4	0.00116462	0.0190532	7.99e-06	2.64e-05	0.00416143	0.00592874	2.6354e-05	4.67504e-05
1.4	0	4	0.00177536	0.0187689	1.03e-05	2.78e-05	0.00368795	0.00596329	2.78261e-05	4.73358e-05
1.3	0	5	0.00115931	0.0197135	7.97e-06	2.82e-05	0.00416557	0.00613314	2.81921e-05	4.85256e-05
1.4	0	5	0.00115695	0.0203378	7.77e-06	2.98e-05	0.00420741	0.00631613	2.97881e-05	5.01803e-05
1.3	0	6	0.00115451	0.0203372	7.96e-06	3e-05	0.00416931	0.00632615	2.99844e-05	5.02523e-05
1.4	0	6	0.00115224	0.0209682	7.76e-06	3.16e-05	0.00421137	0.0065108	3.16415e-05	5.19693e-05
1.3	0	7	0.00115012	0.0209278	7.94e-06	3.17e-05	0.00417274	0.00650894	3.17325e-05	5.19338e-05
1.4	0	7	0.00114793	0.0215651	7.74e-06	3.34e-05	0.00421499	0.00669512	3.34476e-05	5.37115e-05
1.3	0	8	0.00114608	0.021488	7.92e-06	3.34e-05	0.00417589	0.00668226	3.34356e-05	5.35727e-05
1.4	0	8	0.00114396	0.0221315	7.72e-06	3.52e-05	0.00421833	0.00687	3.52072e-05	5.54096e-05
1.3	0	9	0.00114237	0.0220197	7.91e-06	3.51e-05	0.00417878	0.00684678	3.50931e-05	5.51718e-05
1.4	0	9	0.00114031	0.0226696	7.71e-06	3.69e-05	0.00422139	0.00703612	3.69204e-05	5.70662e-05
1.3	0	10	0.00113895	0.022525	7.9e-06	3.67e-05	0.00418145	0.0070031	3.67051e-05	5.6733e-05
1.4	0	10	0.00113695	0.0231815	7.69e-06	3.86e-05	0.00422422	0.00719414	3.85877e-05	5.86834e-05

[truncated: 10 more sheets: （20，20.2）, （21，20.2）, （22，20.2）, （23，20.2）, （24，20.2）, （24，15.1）, （25，15.1）, （26，15.1）, （27，15.1）, （28，15.1）]
