# Supplementary material for: Droplet Hamilton Dynamics 1: the rolling angle of a water droplet on an inclined surface
Source: Research Square preprint supplement (doi:10.21203/rs.3.rs-8817038/v1), 2026-02-10
Supplement: Supplementary file 4 [file b29393aaf3d4ba818ee84838.docx]

Supplementary Information for

**Droplet Hamilton Dynamics 1: the rolling angle of a water droplet on an inclined surface**

**Jian Dong*1,2,Bilong Liu, Dezhao Li3, Da-peng Tan*1**

1Key Laboratory of E&M, Zhejiang University of Technology, Hangzhou 310023, China

2State Key Lab of Transducer Technology, Shanghai Institute of Microsystem and Information Technology, Chinese Academy of Sciences, Shanghai 200031, China

3School of Physics, Zhejiang University of Technology, Hangzhou 310023, China

*[zjutdj@zjut.edu.cn](mailto:zjutdj@zjut.edu.cn); tandapeng@zjut.edu.cn

**This PDF file includes:**

S1: The ridgeline is a B-A curve.

S2: is uniquely determined by when and are fixed.

S3: The determination of when is given.

S4: Calculations of , , , , , , and when is given.

S5: The flow chart of “The judgement of 'pinned' or 'rolls' mode”

**S1: The ridgeline is a B-A curve.**

1. Let’s firstly deduce the B-A equation in . As is shown in Figure S1, the red line is a B-A curve and the point has two [principal curvature](https://fanyi.so.com/?src=onebox" \l "principal curvature" \t "https://www.so.com/_blank)s and . The tangential angle of the point in is the surface tilt angle . is an arbitrary point on the B-A curve . and are two [principal curvature](https://fanyi.so.com/?src=onebox" \l "principal curvature" \t "https://www.so.com/_blank)s in the point. We set up the pressure balance equation on the point and the p point as follows.

(S1)

(S2)

where is the liquid pressure in the point, the liquid pressure in the point and the atmosphere pressure.

Equation (S2) minus equation (S1) and we get

(S3)

The liquid pressure difference between the point and the point can be expressed by

(S4)

The rights of equations (S3) and (S4) should be equal, and we gain

(S5)

Equation (S5) is the B-A equation in the top-body-fixed plane coordinate system .


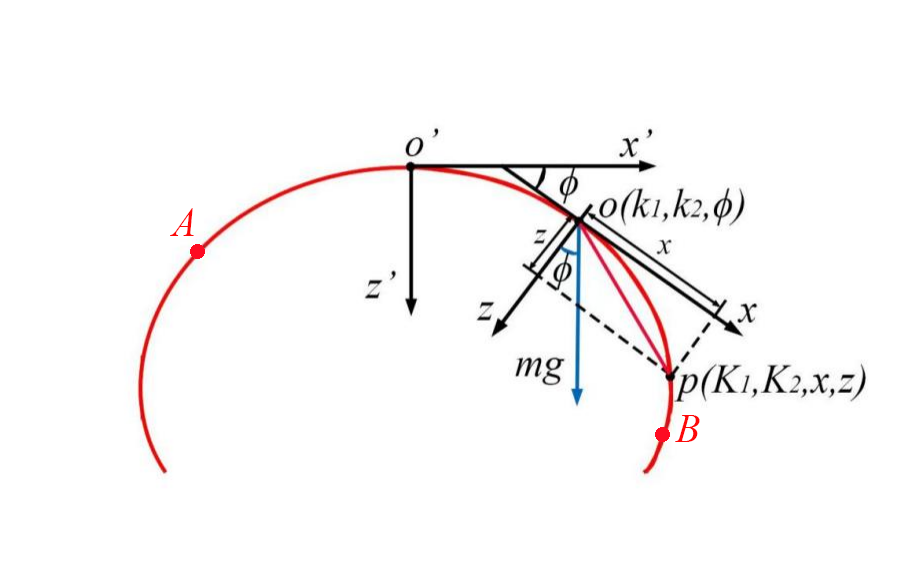


**Figure S1 The top-body-fixed coordinate system and the B-A coordinate system**

of a stationary droplet on an inclined surface. and are determined by the right-hand rule. is the ridgeline of the droplet. The coordinate systems and are the same as those in Figure 1 in manuscript.

1. Now, we begin to prove the ridgeline be a B-A curve in . As is shown in Figure S2, all points on the droplet curved surface are cup points. So, every point on the droplet ridgeline has ,, is the tangential angle of the point in . We [substitute](https://fanyi.so.com/" \l "substitute" \t "https://www.so.com/_blank) and into equation (4) in manuscript and get the ridgeline expression as follows.

(S6)

is the sectional curvature of the point on the cross section vertical to axis. Because of Mesnière's formula, , one principal curvature of the point, can be expressed by

(S7)

In addition, , another principal curvature of the point in plane , can be expressed by

(S8)

Substitute Equation and into equation , we get the expression of the ridgeline in as follows.

(S9)

Equation (S9) has the same form as equation (S5), which is the B-A equation in the top-body-fixed plane coordinate system . So, we deduce that the ridgeline is a B-A curve.


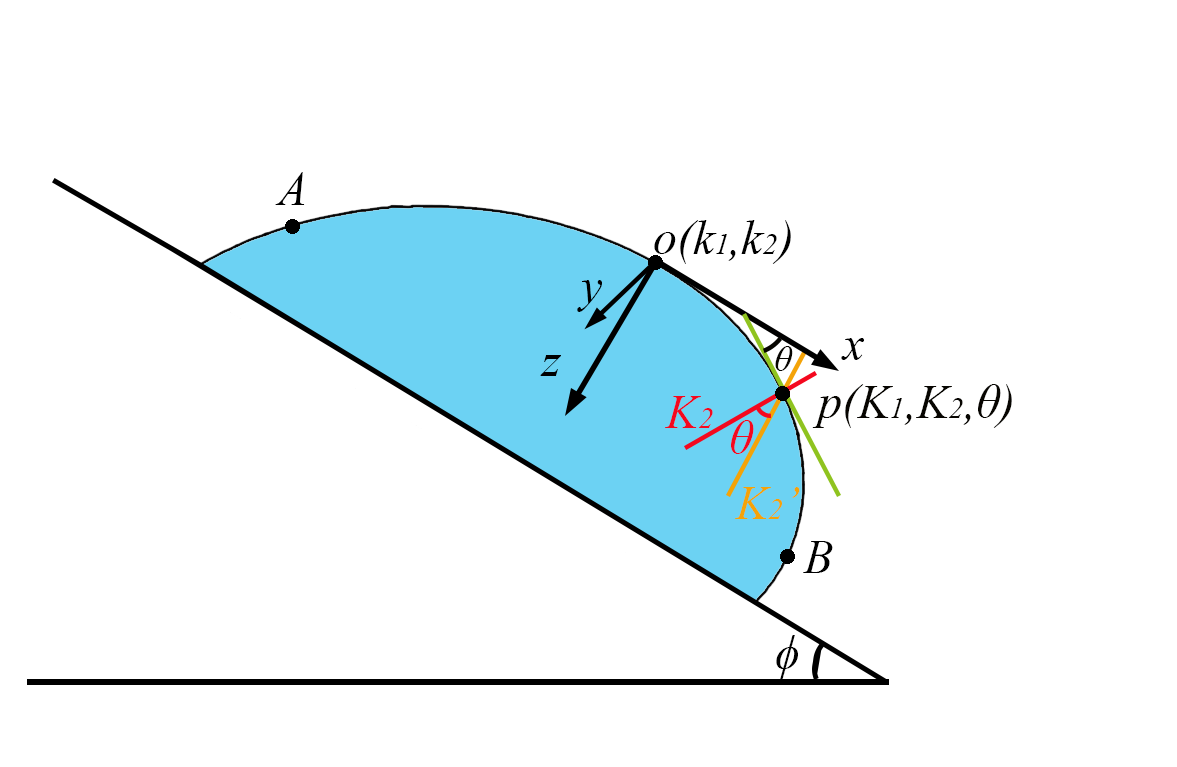


**Figure S2 Two principal curvatures** , **and the sectional curvature**  **on the cross section vertical to**  **axis of an arbitrary point**  **on the ridgeline.**

**S2:**  **is uniquely determined by**  **when**  **and are fixed.**

As is shown in Figure 3, transferring PDE (4) from the top-body-fixed rectangular coordinate system to the top-body-fixed cylindrical coordinate system and using the surface Euler’s formula on the point, we get follows.

(S10)

where and are two [principal curvature](https://fanyi.so.com/?src=onebox" \l "principal curvature" \t "https://www.so.com/_blank)s on the point.

We know PDE (S10) is a Cauchy problem with the vector variable when is fixed. is uniquely determined by when is determined. Because the ridgeline is a B-A curve, is uniquely determined by the vector when is determined. We deduce that is uniquely determined by when is determined. Because is uniquely determined by when is determined, we deduce that is uniquely determined by when is determined. Because is uniquely determined bywhen is determined, we deduce our final conclusion that is uniquely determined by when and are fixed.

**S3: The determination of when is given.**

**S3.1 The volume**  **calculation of the moving droplet with the given**


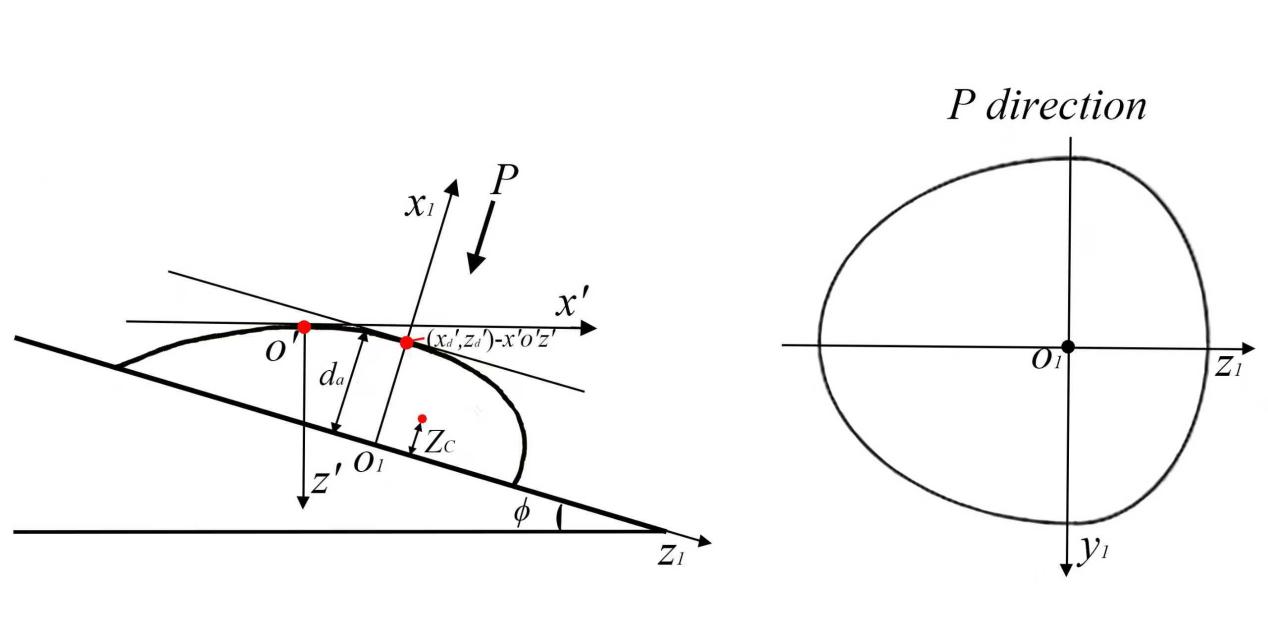


a b

**Figure S3 The schematic diagram of**  **calculation of**  **with the given** **. is determined by the right-hand rule. (a) The side view of a droplet on an inclined plane. (b) P direction view of a droplet on an inclined plane.**

As is shown in Figure S3, the moving droplet lays on an inclined surface with tilt angle . The ridgeline of is a B-A curve and the B-A curve top is .

Supposed that the distance from the point to the inclined surface is . We can calculate of by . Using , we can determine . Subsequently, we can gain the B-A curve from B-A* curve by determined .

The B-A curve in can be fitted as：

(S11)

In , the droplet curved surface is formed by rotating the B-A curve around the axis and can be expressed as：

(S12)

Translate the originof to the point and rotate thecounterclockwise by to obtain.Then, convert the rectangular coordinate system to the spherical coordinate system.The total transformation formulae for coordinate conversion are as follows:

(S13)

By substituting the conversion formula (S12) and into formula (S11), we get:

(S14)

The droplet volume on inclined planes can be calculated as:

(S15)

Its differential expression :

(S16)

By selecting the certain M and N, we obtain the certain . With the given , and , the equation (S14) is related to unknown variant . Using the MATLAB internal function to solve the equation (S14), we can get the value of . Subsequently, we substituteinto the difference expression (S16) to obtain the droplet volume .

The flow chart of “ and calculations” for the above algorithms is shown in Figure S4 .


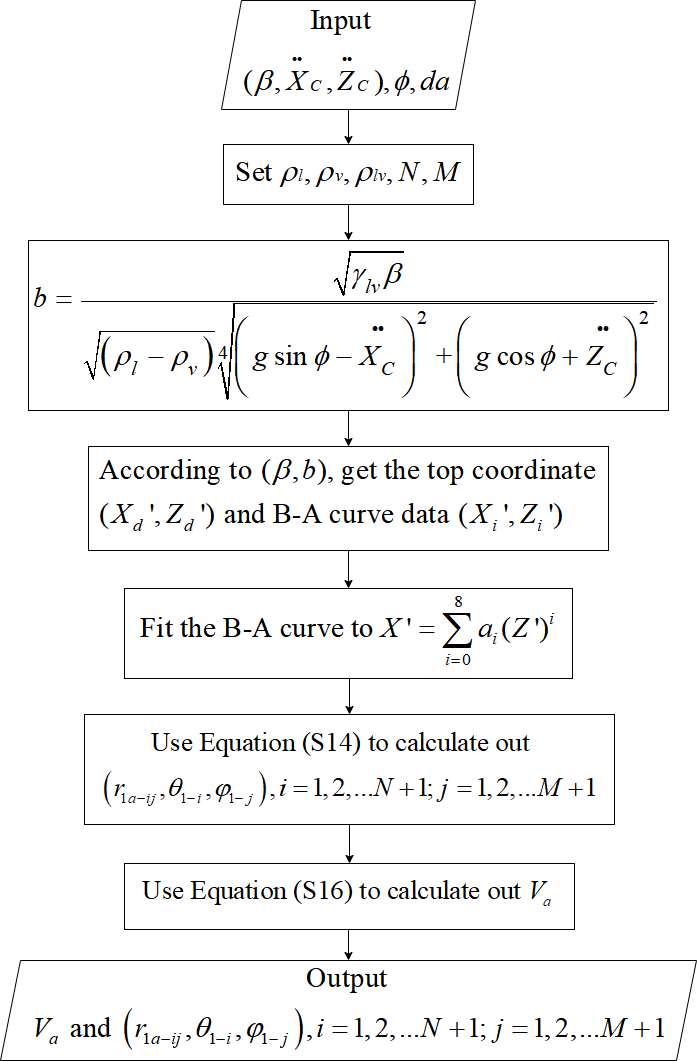


**Figure S4 The flow chart of “** **and** **calculations”**

**S3.2 The determination of the moving droplet shape with the given**

we can set up a loop in the software to search out to make sure . When is determined，we can get using the method in S3.1. Subsequently, fitting we can get the curved surface . The moving droplet body is formed by and the plane .

The flow chart “ determination” for the above algorithms is shown in Figure S5.


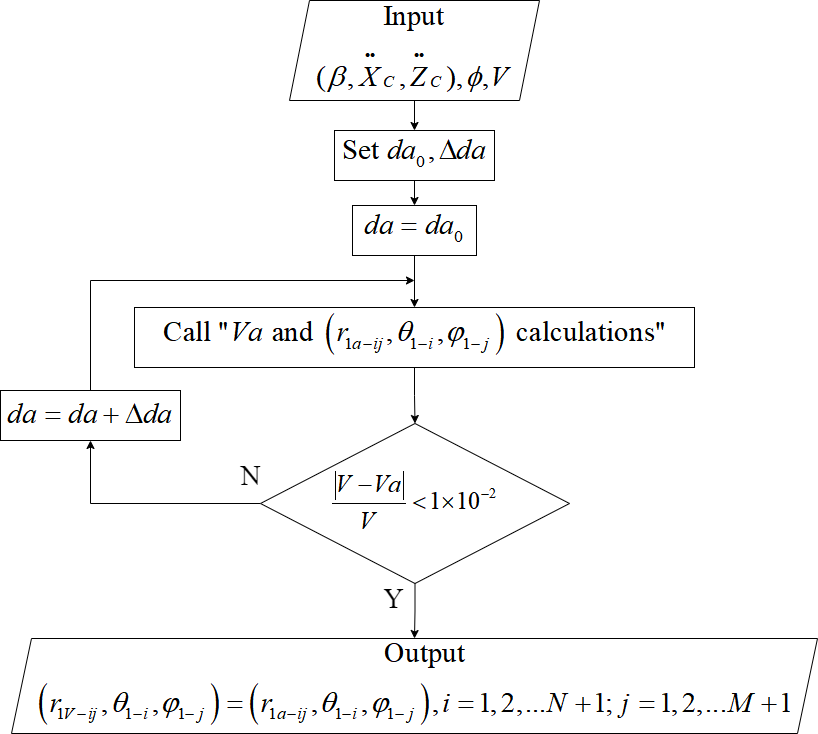


**Figure S5 The flow chart of “ determination”.**

**S4: Calculations of , , , , , , and when is given.**

Spherical coordinates of the points on the droplet profile surface are . We can calculate out , , and in the spherical coordinate system as follows.

(S17)

Cartesian coordinates of the points on the droplet profile surface are . can be transfered by spherical coordinates as follows.

(S18)

We can calculate out , , and in the Cartesian coordinate system using the following methods.

Calculations of and in X direction windward: Firstly, search in all and find out .corresponds toin. Secondly, find out all points and take outas the boundary of X direction windward. Thirdly, according to the boundary, we calculate out and , , and calculate out .

Calculations of and in Z direction windward: Firstly, search in all and find out .cooresponds to in. Secondly, find out all pointsand take out as the boundary of Z direction windward. Thirdly, according to the boundary, we calculate out and, , and calculate out .

**S5: The flow chart of “The judgement of 'pinned' or 'rolls' mode”**

The flow chart of “The judgement of 'pinned' or 'rolls' mode” is shown in Figure S6.


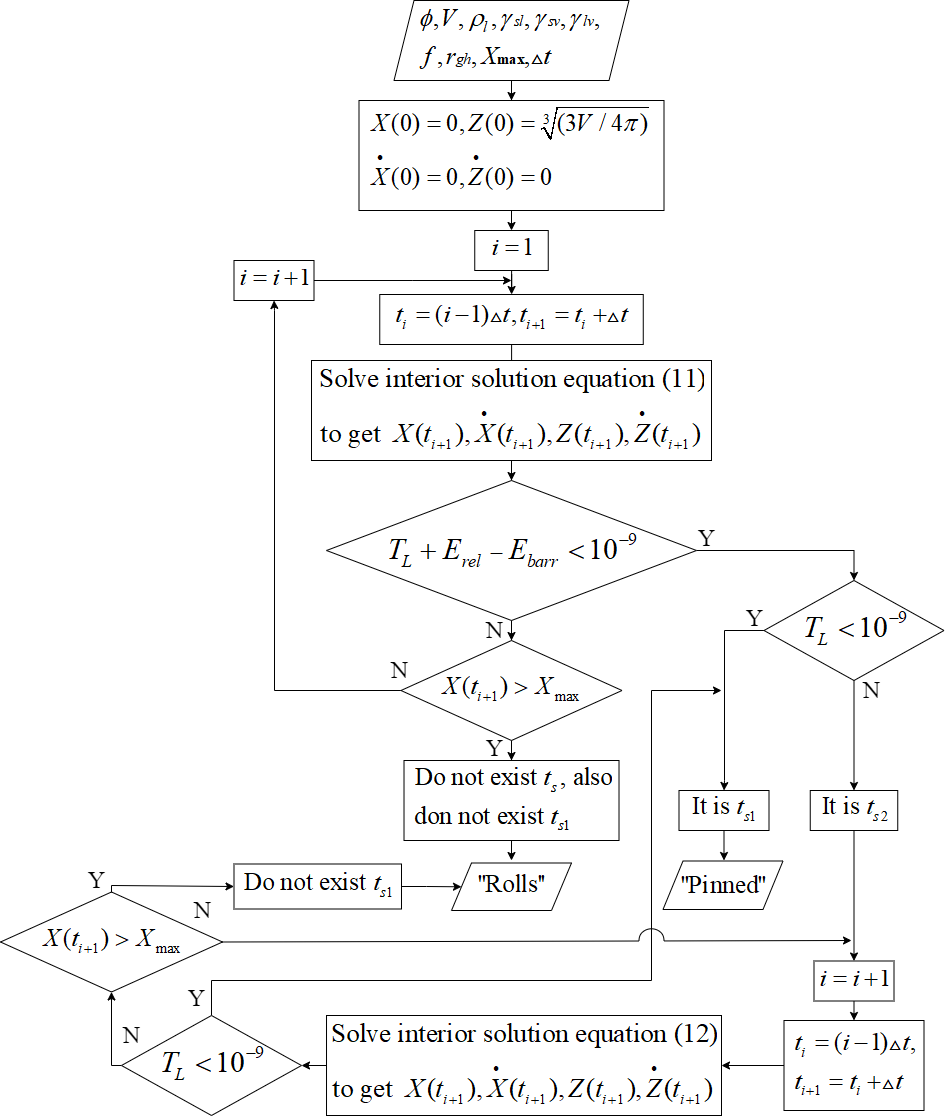


**Figure S6. The flow chart of “The judgement of 'pinned' or 'rolls' mode”.**
